# Supplementary material for: Regioselective and diastereodivergent organocatalytic asymmetric vinylogous Michael addition
Source: Royal Society of Chemistry journal article supplement (doi:10.1039/d1qo00371b), 2021-01-01
Supplement: d1qo00371b1.pdf [file d1qo00371b1.pdf]

## Supporting Information

### Regioselective and Diastereodivergent Organocatalytic Asymmetric Vinylogous Michael Addition

|                                                                                          |     |
|------------------------------------------------------------------------------------------|-----|
| A: General Remarks and Starting Materials .....                                          | 2   |
| B: Optimization Tables.....                                                              | 6   |
| C: General procedure for $\gamma$ - and $\gamma'$ -regioselective AVMA Reaction .....    | 14  |
| D: Products of $\gamma$ - and $\gamma'$ -regioselective AVMA and [4+2] cycloadducts..... | 18  |
| E: NMR spectra of substrates and products .....                                          | 42  |
| F: HPLC Charts of Products. ....                                                         | 130 |
| G: Determination of Absolute Configuration.....                                          | 210 |
| H. DFT Calculations Details .....                                                        | 217 |

## A: General Remarks and Starting Materials

### A1: General Remarks

$^1\text{H}$  NMR spectra and  $^{13}\text{C}$  NMR spectra were recorded on a Bruker AV-400/500 spectrometer (400/500 MHz and 100/125 MHz). Chemical shifts ( $\delta$ ) for protons are reported in parts per million (ppm) downfield from tetramethylsilane and are referenced to residual solvent peak. Chemical shifts ( $\delta$ ) for carbon are reported in parts per million (ppm) downfield from tetramethylsilane and are referenced to the carbon resonances of the solvent. Data are reported as follows: chemical shift, multiplicity (br = broad, s = singlet, d = doublet, dd = doublet of doublets, t = triplet, dt = doublet of triplets, q = quartet, quint = quintet, m = multiplet), coupling constants ( $J$ ) in Hertz (Hz), integration; “app” is used to denote the apparent splitting of a signal.

High resolution mass spectrometry (HRMS) was carried out using MicroMass GCT CA 055 instrument and recorded on a MicroMass LCTTM spectrometer.

Optical rotations were measured on an Autopol III automatic polarimeter (Rudolph Research analytical).  $[\alpha]_{\text{D}}^{\text{T}}$  values are reported in  $10^{-1} \text{ deg cm}^2 \text{ g}^{-1}$ ; concentrations ( $c$ ) are quoted in g/100 mL; D refers to the D-line of sodium (589 nm); temperatures (T) are given in degrees Celsius ( $^{\circ}\text{C}$ ).

Melting points were measured on a XT3A apparatus.

Enantiomeric excesses were determined by HPLC analysis on an Agilent HPLC 1200 or 1220 Series instrument, using the chiral stationary phase column (25 cm x 4.6 mm internal diameter, Daicel Chiralpak IA, IB, AD-H, AS-H as noted) specified in the individual experiment.

### A2: Starting Materials.

All solvents and inorganic reagents were from commercial sources (Adamas-beta, TCI, or Energy Chemical) and used without purification unless otherwise noted. Nitroalkenes were synthesized following the literature procedure.<sup>[1]</sup> The aminocatalysts **3a** and **3b** were prepared according our previous papers.<sup>[2]</sup> The different  $\beta$ -alkyl-cyclohex-2-enones **1**<sup>[3]</sup> and  $\beta$ -substituted-cyclohex-3-enones **1'**<sup>[4]</sup> were achieved as showed in Scheme S1.

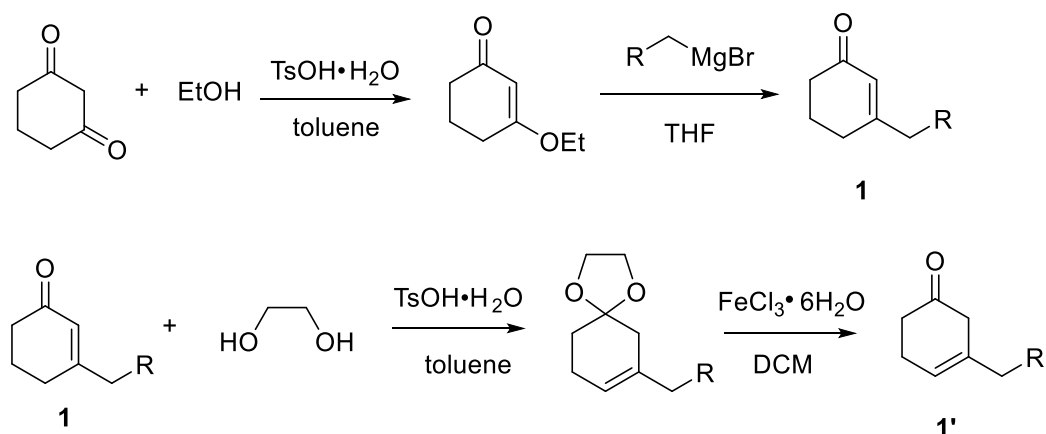

**Scheme S1.** Synthesis of starting materials **1** and **1'**

*p*-Toluenesulfonic acid (400 mg, 2.1 mmol) was added to a stirred solution of 1,3-cyclohexanedione (12.6 g, 112 mmol) in EtOH (50 mL) and PhMe (180 mL) at rt. The reaction mixture was heated at

reflux overnight. The reaction mixture was allowed to cool to rt before concentration to give orange oil under reduced pressure. The crude material was dissolved in EtOAc (100 mL) and neutralized using 1 M NaOH. The organic layer was washed by brine, dried by MgSO<sub>4</sub> and concentrated to afford intermediate 3-ethoxy-cyclohexenones which was used without further purification.

3-ethoxy-cyclohex-2-enones (20 mmol, 1.0 equiv) in anhydrous THF (15 mL) was added dropwise to a solution of a Grignard reagent (30 mmol 1.5 equiv) under argon at 0 °C. Once the addition was completed, the solution was stirred at 45 °C for about 2 h. The reaction was slowly quenched with diluted aqueous acid (1 M HCl) at 0 °C. The layers were separated and the aqueous layer extracted with EtOAc (3×50 mL). The combined organic layers were washed with saturated NaHCO<sub>3</sub> and brine, dried with Na<sub>2</sub>SO<sub>4</sub>, then filtered and evaporated under reduced pressure. The crude product was purified by flash column chromatography (PE/EA = 10 :1) to give the product β-alkyl-cyclohex-2-enones **1**.

A mixture of β-alkyl-2-cyclohex-2-enones **1** (36.00 mmol), toluenesulfonic acid (100 mg) and ethylene glycol (7 mL) in 100 mL of toluene is refluxed overnight and water formed is removed by Dean-Stark trap. The residue after concentration is chromatographed on silica gel (PE/EA = 95:5) to give the 7-alkyl-1,4-dioxaspiro[4.5]dec-7-enes.

To a solution of 7-alkyl-1,4-dioxaspiro[4.5]dec-7-enes (17 mmol) in CH<sub>2</sub>Cl<sub>2</sub> (25 mL) at rt was added FeCl<sub>3</sub>·6H<sub>2</sub>O (1.66 g, 3.5 equiv). The resulting yellow to amber colored suspension was stirred for about 15 min and TLC was conducted to make sure the reactant was consumed. Then saturated aqueous NaHCO<sub>3</sub> was added to quench the reaction. The aqueous layer was extracted three times with CH<sub>2</sub>Cl<sub>2</sub> and the combined organics were washed with brine, dry over MgSO<sub>4</sub>, and concentrated under reduced pressure. The resulting oil was chromatographed on silica gel (PE/EA = 95:5) to give different β-alkyl-cyclohex-3-enones **1'**.

### A3: For some selected Starting Materials NMR data.

#### 1'a: β-ethyl-cyclohex-3-enone

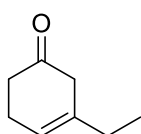

<sup>1</sup>H NMR (400 MHz, CDCl<sub>3</sub>): δ (ppm) 1.04 (t, *J* = 7.6 Hz, 3H), 2.00-2.06 (q, *J*<sub>1</sub> = 7.2 Hz, *J*<sub>2</sub> = 14.8 Hz, 2H), 2.45 (s, 4H), 2.81 (s, 2H), 5.61 (s, 1H). <sup>13</sup>C NMR (100 MHz, CDCl<sub>3</sub>): δ (ppm) 12.0, 24.9, 29.4, 38.5, 42.9, 119.2, 137.7, 211.0. HRMS (EI): exact mass calculated for [M]<sup>+</sup> (C<sub>8</sub>H<sub>12</sub>O) requires *m/z* 124.0888, found *m/z* 124.0891.

#### 1'f: β-benzyl-cyclohex-3-enone

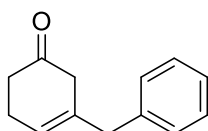

<sup>1</sup>H NMR (400 MHz, CDCl<sub>3</sub>): δ (ppm) 2.42 (s, 4H), 2.71 (s, 2H), 3.31 (s, 2H), 5.68 (s, 1H), 7.14-7.16 (m, 2H), 7.20-7.21 (m, 1H), 7.26-7.30 (m, 2H). <sup>13</sup>C NMR (100 MHz, CDCl<sub>3</sub>): δ (ppm) 25.0, 38.4, 42.6, 43.4, 122.4, 126.4, 128.5, 128.9, 135.6, 138.7, 210.4. HRMS (EI): exact mass calculated for [M]<sup>+</sup> (C<sub>13</sub>H<sub>14</sub>O) requires *m/z* 186.1045, found *m/z* 186.1044.

**1'g:  $\beta$ -phenethyl-cyclohex-3-enone**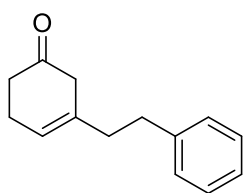

$^1\text{H}$  NMR (400 MHz,  $\text{CDCl}_3$ ):  $\delta$  (ppm) 2.29-2.33 (m, 2H), 2.42 (s, 4H), 2.71-2.75 (m, 2H), 2.83 (s, 2H), 5.62 (s, 1H), 7.15-7.20 (m, 3H), 7.26-7.29 (m, 2H).  $^{13}\text{C}$  NMR (100 MHz,  $\text{CDCl}_3$ ):  $\delta$  (ppm) 24.9, 34.0, 38.4, 38.4, 43.1, 121.2, 126.0, 128.3, 128.4, 135.5, 141.6, 210.6. HRMS (EI): exact mass calculated for  $[\text{M}]^+$  ( $\text{C}_{14}\text{H}_{16}\text{O}$ ) requires  $m/z$  200.1201, found  $m/z$  200.1202.

**1'q: 4,5-dihydro-[1,1'-biphenyl]-3(2H)-one**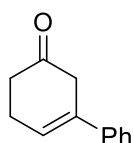

$^1\text{H}$  NMR (400 MHz,  $\text{CDCl}_3$ ):  $\delta$  (ppm) 2.53-2.57 (m, 2H), 2.62-2.68 (m, 2H), 3.27-3.28 (m, 2H), 6.31-6.34 (m, 1H), 7.25-7.29 (m, 1H), 7.32-7.38 (m, 4H).  $^{13}\text{C}$  NMR (100 MHz,  $\text{CDCl}_3$ ):  $\delta$  (ppm) 25.3, 38.0, 42.0, 123.6, 125.1, 127.6, 128.6, 134.9, 139.7, 210.0. HRMS (EI): exact mass calculated for  $[\text{M}]^+$  ( $\text{C}_{12}\text{H}_{12}\text{O}$ ) requires  $m/z$  172.0888, found  $m/z$  172.0890.

**1'r: 3',5'-dimethoxy-4,5-dihydro-[1,1'-biphenyl]-3(2H)-one**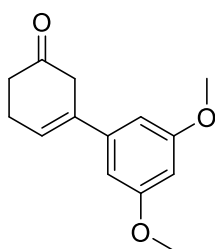

$^1\text{H}$  NMR (400 MHz,  $\text{CDCl}_3$ ):  $\delta$  (ppm) 2.54-2.57 (m, 2H), 2.63-2.66 (m, 2H), 3.25 (s, 2H), 3.80 (s, 6H), 6.32-6.34 (m, 1H), 6.40-6.41 (m, 1H), 6.51-6.51 (m, 2H).  $^{13}\text{C}$  NMR (100 MHz,  $\text{CDCl}_3$ ):  $\delta$  (ppm) 25.2, 38.0, 42.1, 55.4, 99.4, 103.6, 124.0, 134.9, 142.0, 160.8, 209.9. HRMS (EI): exact mass calculated for  $[\text{M}]^+$  ( $\text{C}_{14}\text{H}_{16}\text{O}_3$ ) requires  $m/z$  232.1099, found  $m/z$  232.1101.

**1's: 3',5'-bis(trifluoromethyl)-4,5-dihydro-[1,1'-biphenyl]-3(2H)-one**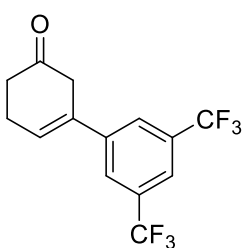

$^1\text{H}$  NMR (400 MHz,  $\text{CDCl}_3$ ):  $\delta$  (ppm) 2.59-2.62 (m, 2H), 2.71-2.74 (m, 2H), 3.30 (s, 2H), 6.51-6.53 (m, 1H), 7.79 (s, 3H).  $^{13}\text{C}$  NMR (100 MHz,  $\text{CDCl}_3$ ):  $\delta$  (ppm) 25.3, 37.3, 41.5, 121.1, 121.2, 121.2, 121.9, 124.6, 125.2, 127.5, 131.4, 131.8, 132.1, 132.4, 132.9, 141.7, 208.3. HRMS (EI): exact mass calculated for  $[\text{M}]^+$  ( $\text{C}_{14}\text{H}_{10}\text{F}_6\text{O}$ ) requires  $m/z$  308.0636, found  $m/z$  308.0637.

**1'u: 3-(phenylethynyl)cyclohex-3-en-1-one**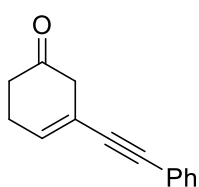

$^1\text{H}$  NMR (400 MHz,  $\text{CDCl}_3$ ):  $\delta$  (ppm) 2.50-2.53 (m, 2H), 2.58-2.63 (m, 2H), 3.09-3.09 (m, 2H), 6.37-6.39 (m, 1H), 7.31-7.33 (m, 3H), 7.42-7.45 (m, 2H).  $^{13}\text{C}$  NMR (100 MHz,  $\text{CDCl}_3$ ):  $\delta$  (ppm) 25.4, 37.7, 43.2, 88.4, 88.5, 119.0, 122.9, 128.4, 131.5, 133.5, 208.0. HRMS (EI): exact mass calculated for  $[\text{M}]^+$  ( $\text{C}_{14}\text{H}_{12}\text{O}$ ) requires  $m/z$  196.0888, found  $m/z$  196.0891.

**1'v: (E)-3-styrylcyclohex-3-en-1-one**

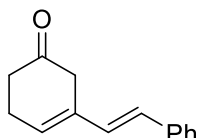

$^1\text{H}$  NMR (400 MHz,  $\text{CDCl}_3$ ):  $\delta$  (ppm) 2.53-2.57 (m, 2H), 2.63-2.64 (m, 2H), 3.14 (s, 2H), 6.08 (s, 1H), 6.37-6.41 (d,  $J = 16.0$  Hz, 1H), 6.83-6.87 (d,  $J = 16.0$  Hz, 1H), 7.21-7.26 (m, 1H), 7.30-7.34 (m, 2H), 7.40-7.42 (m, 2H).  $^{13}\text{C}$  NMR (100 MHz,  $\text{CDCl}_3$ ):  $\delta$  (ppm) 25.5, 38.5, 39.6, 126.4, 126.8, 127.6, 128.5, 128.7, 129.8, 134.1, 137.1, 209.7. HRMS (EI): exact mass calculated for  $[\text{M}]^+$  ( $\text{C}_{14}\text{H}_{14}\text{O}$ ) requires  $m/z$  198.1045, found  $m/z$  198.1046.

- [1] J. M. Lopchuk, R. P. Hughes, G. W. Gribble. *Org. Lett.* **2013**, *15*, 5218-5221.
- [2] a) H. Huang, F. Yu, Z. Jin, W. Li, W. Wu, X. Liang, J. Ye. *Chem. Commun.* **2010**, *46*, 5957-5959; b) P. Li, Y. Wang, X. Liang, J. Ye. *Chem. Commun.* **2008**, 3302-3304.
- [3] a) B. K. Bharat, R. M. James, Z. Murray. *Synthesis* **1991**, *2*, 176; b) X. Yin, Y. Zheng, X. Feng, K. Jiang, X.-Z. Wei, N. Gao, Y.-C. Chen. *Angew. Chem. Int. Ed.* **2014**, *53*, 6245-6248.
- [4] a) J. H. Babler, N. C. Malek, M. J. Coghlan. *J. Org. Chem.* **1978**, *43*, 1821-1823; b) D. Becker, Z. Harel, M. Nagler, A. Gillon. *J. Org. Chem.* **1982**, *47*, 3297-3306; c) S. E. Sen, S. L. Roach, J. K. Boggs, G. J. Ewing, J. Magrath. *J. Org. Chem.* **1997**, *62*, 6684-6686.

## B: Optimization Tables

**Table S1.** The effect of the primary amine on  $\gamma$ -AVMA reaction of  $\beta$ -methyl-cyclohex-2-enone<sup>[a]</sup>

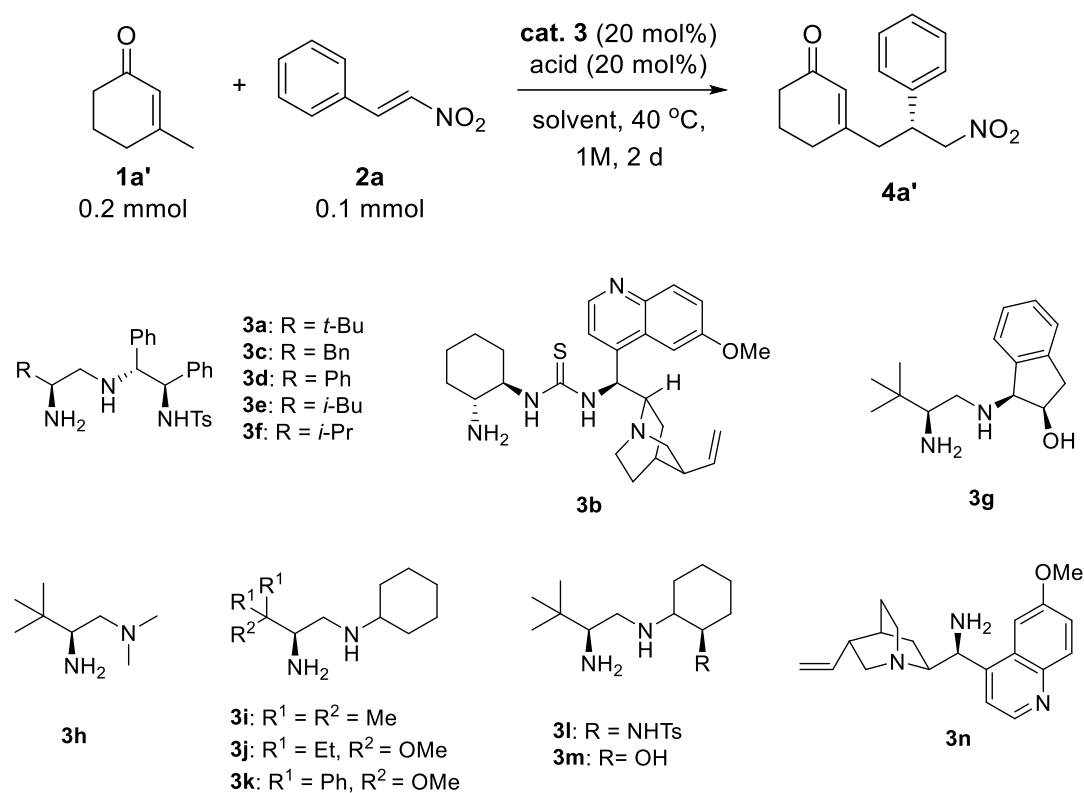

| entry            | catalyst  | conv. (%) <sup>[b]</sup> | ee (%) <sup>[c]</sup> |
|------------------|-----------|--------------------------|-----------------------|
| 1 <sup>[d]</sup> | <b>3a</b> | 90                       | 87                    |
| 2                | <b>3b</b> | 74                       | 90                    |
| 3 <sup>[d]</sup> | <b>3c</b> | 24                       | 47                    |
| 4 <sup>[d]</sup> | <b>3d</b> | 15                       | -14                   |
| 5 <sup>[d]</sup> | <b>3e</b> | 66                       | 71                    |
| 6 <sup>[d]</sup> | <b>3f</b> | 50                       | 81                    |
| 7                | <b>3g</b> | 79                       | 32                    |
| 8                | <b>3h</b> | 36                       | 35                    |
| 9                | <b>3i</b> | 88                       | 40                    |
| 10               | <b>3j</b> | 80                       | 60                    |
| 11               | <b>3k</b> | 20                       | 37                    |
| 12               | <b>3l</b> | 84                       | 43                    |
| 13               | <b>3m</b> | 68                       | 15                    |
| 14               | <b>3n</b> | 57                       | 81                    |

[a] All reactions were performed with **2a** (0.1 mmol), **1a'** (0.2 mmol), **cat. 3** (20 mol%) and 2-F-C<sub>6</sub>H<sub>4</sub>CO<sub>2</sub>H (30 mol%) in 100  $\mu$ L of toluene. [b] Determined by GC analysis. [c] Determined by chiral HPLC analysis. [d] 2-F-C<sub>6</sub>H<sub>4</sub>CO<sub>2</sub>H (40 mmol%) was added.

**Table S2.** The effect of the concentration and acid additives on  $\gamma$ -regioselective AVMA reaction<sup>[a]</sup>

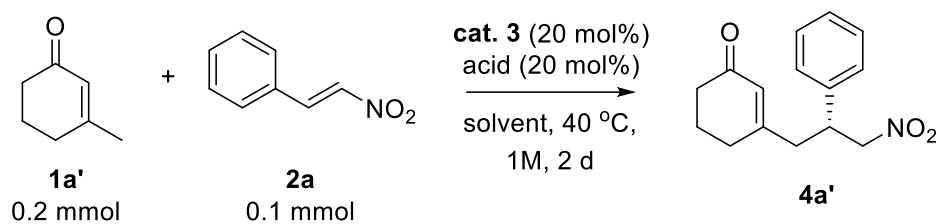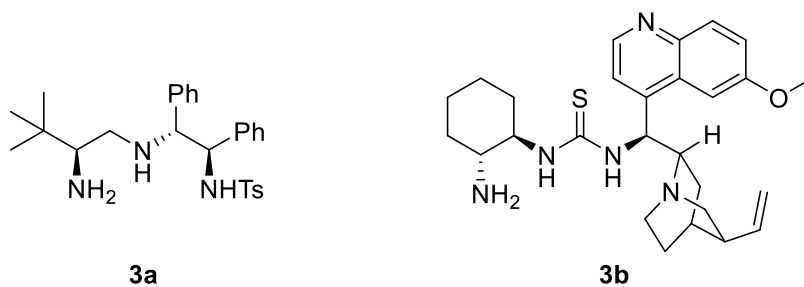

| entry                      | catalyst  | acid                                                                                 | conv. (%) <sup>[b]</sup> | ee (%) <sup>[c]</sup> |
|----------------------------|-----------|--------------------------------------------------------------------------------------|--------------------------|-----------------------|
| 1                          | <b>3a</b> | 2-F-C <sub>6</sub> H <sub>4</sub> CO <sub>2</sub> H                                  | 74                       | 90                    |
| <b>2<sup>[d]</sup></b>     | <b>3a</b> | <b>2-F-C<sub>6</sub>H<sub>4</sub>CO<sub>2</sub>H</b>                                 | <b>60</b>                | <b>94</b>             |
| 3                          | <b>3a</b> | 2-F-C <sub>6</sub> H <sub>4</sub> CO <sub>2</sub> H                                  | 84                       | 76                    |
| 4 <sup>[e]</sup>           | <b>3a</b> | 2-F-C <sub>6</sub> H <sub>4</sub> CO <sub>2</sub> H                                  | 90                       | 87                    |
| 5 <sup>[d, e]</sup>        | <b>3a</b> | 2-F-C <sub>6</sub> H <sub>4</sub> CO <sub>2</sub> H                                  | 84                       | 89                    |
| 6 <sup>[d, e]</sup>        | <b>3a</b> | C <sub>6</sub> H <sub>5</sub> CO <sub>2</sub> H                                      | 74                       | 45                    |
| 7 <sup>[d, e]</sup>        | <b>3a</b> | AcOH                                                                                 | 78                       | -16                   |
| 8 <sup>[d, e]</sup>        | <b>3a</b> | 2-MeO-C <sub>6</sub> H <sub>4</sub> CO <sub>2</sub> H                                | 75                       | 40                    |
| 9 <sup>[d, e]</sup>        | <b>3a</b> | 3-Br-2-F-C <sub>6</sub> H <sub>3</sub> CO <sub>2</sub> H                             | 83                       | 90                    |
| <b>10<sup>[d, e]</sup></b> | <b>3b</b> | <b>2-NO<sub>2</sub>-C<sub>6</sub>H<sub>4</sub>CO<sub>2</sub>H</b>                    | <b>67</b>                | <b>95</b>             |
| 11 <sup>[d, e]</sup>       | <b>3b</b> | 3,5-(NO <sub>2</sub> ) <sub>2</sub> -C <sub>6</sub> H <sub>3</sub> CO <sub>2</sub> H | 36                       | 93                    |
| 12 <sup>[d, e]</sup>       | <b>3b</b> | 4-NO <sub>2</sub> -C <sub>6</sub> H <sub>4</sub> CO <sub>2</sub> H                   | 61                       | 85                    |

[a] All reactions were performed with **2a** (0.1 mmol), **1a'** (0.2 mmol), **cat. 3** (20 mol%) and acid (30 mol%) in 100  $\mu$ L of toluene. [b] Determined by GC analysis. [c] Determined by chiral HPLC analysis. [d] Reaction in 500  $\mu$ L of toluene. [e] acid (40 mol%) was added.

**Table S3.** Study of  $\gamma$ -regioselective AVMA reaction catalyzed by **3a** and **3b**<sup>[a]</sup>

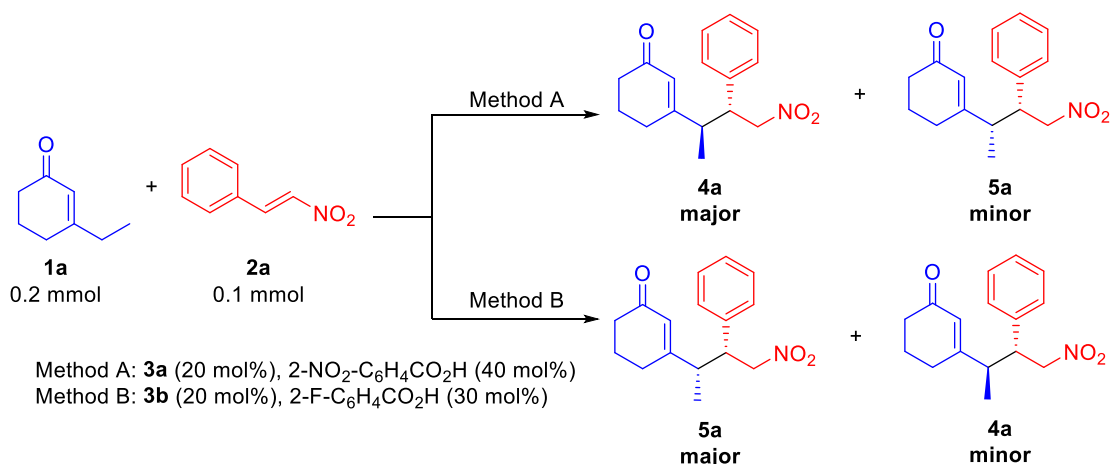

| entry | Method | conv. (%) <sup>[b]</sup> | ee (%) <sup>[c]</sup>             | d.r. ( <i>anti</i> : <i>syn</i> ) <sup>[d]</sup> |
|-------|--------|--------------------------|-----------------------------------|--------------------------------------------------|
| 1     | A      | 96                       | 55 ( <b>4a</b> )/56 ( <b>5a</b> ) | 88 ( <b>4a</b> ):12 ( <b>5a</b> )                |
| 2     | B      | 77                       | 94 ( <b>4a</b> )/93 ( <b>5a</b> ) | 13 ( <b>4a</b> ):87 ( <b>5a</b> )                |

[a] All reactions were performed with **2a** (0.1 mmol), **1a** (0.2 mmol), **cat. 3** (20 mol%) in toluene (0.2 M) for 3 days.  
 [b] Determined by GC analysis. [c] Determined by chiral HPLC analysis. [d] was determined by <sup>1</sup>H NMR analysis of the crude reactions.

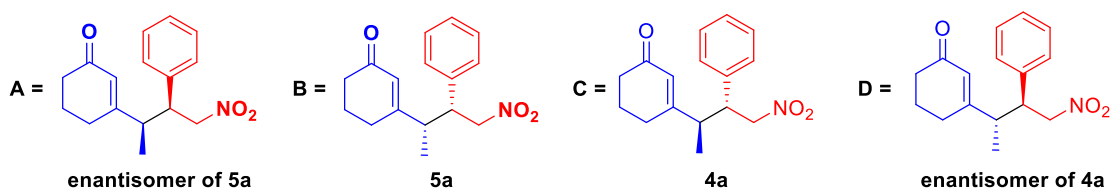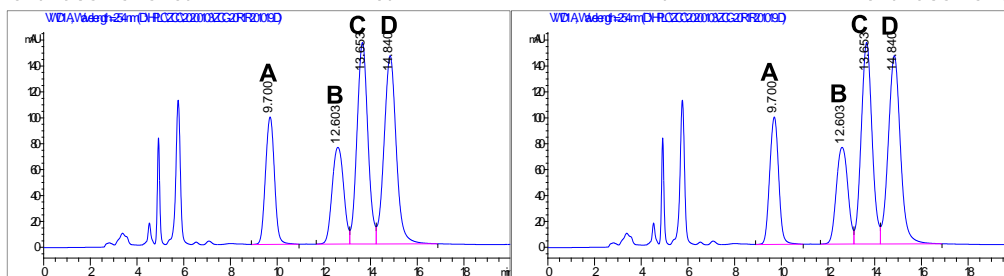

**Figure S1**

**Figure S2**

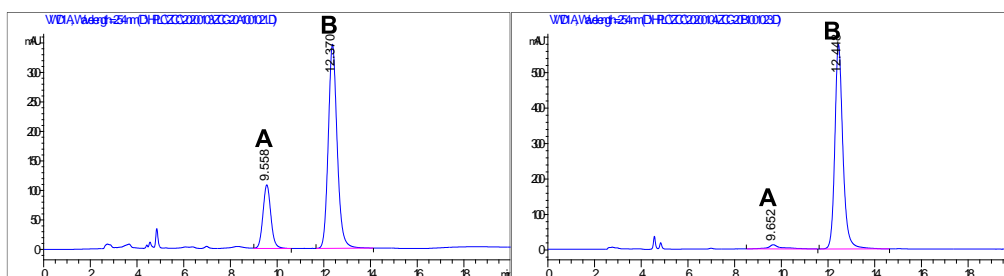

**Figure S3.**

**Figure S4**



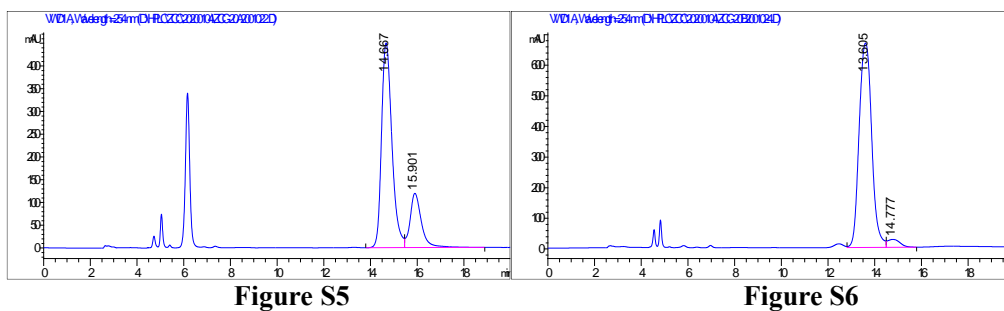

Notes:

- (1) Figure S1 and Figure S2: Chiral HPLC analysis for racemic stereoisomers of the reaction in Table S1.
- (2) Figure S3: Chiral HPLC analysis for minor diastereoisomer (**5a**) of Method A in Table S1.
- (3) Figure S5: Chiral HPLC analysis for major diastereoisomer (**4a**) of Method A in Table S1.
- (4) Figure S4: Chiral HPLC analysis for major diastereoisomer (**5a**) of Method B in Table S1.
- (5) Figure S6: Chiral HPLC analysis for minor diastereoisomer (**4a**) of Method B in Table S1.

**Table S4.** The effect of the acids on  $\gamma$ -regioselective *anti*-AVMA reaction<sup>[a]</sup>

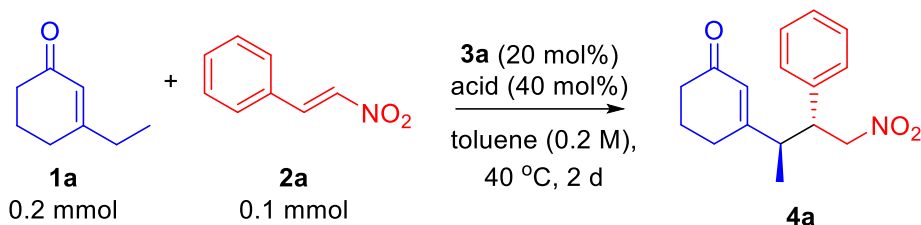

| entry                | acid                                                                                 | conv. (%) <sup>[b]</sup> | ee (%) <sup>[c]</sup> | d.r. <sup>[d]</sup> |
|----------------------|--------------------------------------------------------------------------------------|--------------------------|-----------------------|---------------------|
| 1                    | 2-F-C <sub>6</sub> H <sub>4</sub> CO <sub>2</sub> H                                  | 91                       | 76                    | 80:20               |
| 2                    | 2-OH-C <sub>6</sub> H <sub>4</sub> CO <sub>2</sub> H                                 | 64                       | 75                    | 83:17               |
| 3                    | 2-NO <sub>2</sub> -C <sub>6</sub> H <sub>4</sub> CO <sub>2</sub> H                   | 96                       | 88                    | 88:12               |
| 4                    | 3-NO <sub>2</sub> -C <sub>6</sub> H <sub>4</sub> CO <sub>2</sub> H                   | 71                       | 75                    | 84:16               |
| 5                    | 4-NO <sub>2</sub> -C <sub>6</sub> H <sub>4</sub> CO <sub>2</sub> H                   | 81                       | 71                    | 81:19               |
| 6                    | 2-MeO-C <sub>6</sub> H <sub>4</sub> CO <sub>2</sub> H                                | 85                       | 38                    | 66:34               |
| 7                    | 3,5-(NO <sub>2</sub> ) <sub>2</sub> -C <sub>6</sub> H <sub>3</sub> CO <sub>2</sub> H | 88                       | 81                    | 77:23               |
| 8                    | 2-F-4-NO <sub>2</sub> -C <sub>6</sub> H <sub>3</sub> CO <sub>2</sub> H               | 89                       | 85                    | 88:12               |
| 9                    | 2-NO <sub>2</sub> -4-F-C <sub>6</sub> H <sub>3</sub> CO <sub>2</sub> H               | 77                       | 89                    | 90:10               |
| 10 <sup>[e]</sup>    | 2-NO <sub>2</sub> -4-F-C <sub>6</sub> H <sub>3</sub> CO <sub>2</sub> H               | 76                       | 90                    | 92:8                |
| 11 <sup>[e, f]</sup> | 2-NO <sub>2</sub> -4-F-C <sub>6</sub> H <sub>3</sub> CO <sub>2</sub> H               | 69                       | 91                    | 94:6                |
| 12 <sup>[e, g]</sup> | 2-NO <sub>2</sub> -4-F-C <sub>6</sub> H <sub>3</sub> CO <sub>2</sub> H               | 68                       | 92                    | 94:6                |

[a] All reactions were performed with **2a** (0.1 mmol), **1a** (0.2 mmol), **cat. 3a** (20 mol%), and acid (40 mol%) in toluene. [b] Determined by GC analysis. [c] Determined by chiral HPLC analysis. [d] Determined by GC analysis. [e] The reaction was reacted at 30 °C. [f] Acid (50 mol%) was added. [g] Acid (60 mol%) was added.

**Table S5.** The effect of the acids on  $\gamma$ -regioselective *syn*-AVMA reaction<sup>[a]</sup>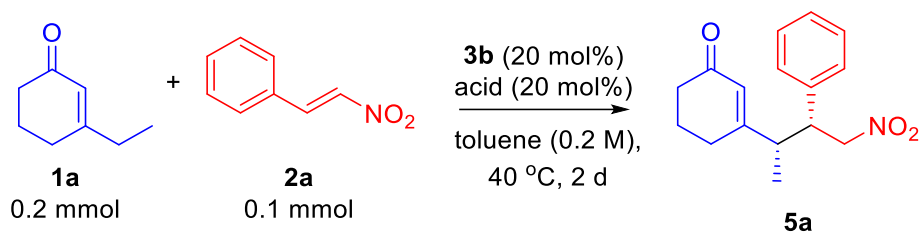

| entry                      | acid                                                                                 | conv. (%) <sup>[b]</sup> | ee (%) <sup>[c]</sup> | d.r. <sup>[d]</sup> |
|----------------------------|--------------------------------------------------------------------------------------|--------------------------|-----------------------|---------------------|
| 1                          | C <sub>6</sub> H <sub>5</sub> CO <sub>2</sub> H                                      | 70                       | 94                    | 37:63               |
| 2                          | 2-MeO-C <sub>6</sub> H <sub>4</sub> CO <sub>2</sub> H                                | 74                       | 93                    | 37:63               |
| 3                          | 2-OH-C <sub>6</sub> H <sub>4</sub> CO <sub>2</sub> H                                 | 48                       | 97                    | 26:74               |
| 4                          | 2-F-C <sub>6</sub> H <sub>4</sub> CO <sub>2</sub> H                                  | 58                       | 96                    | 44:56               |
| 5                          | 2-NO <sub>2</sub> -C <sub>6</sub> H <sub>4</sub> CO <sub>2</sub> H                   | 50                       | 97                    | 21:79               |
| 6                          | 3-NO <sub>2</sub> -C <sub>6</sub> H <sub>4</sub> CO <sub>2</sub> H                   | 75                       | 98                    | 28:72               |
| 7                          | 4-NO <sub>2</sub> -C <sub>6</sub> H <sub>4</sub> CO <sub>2</sub> H                   | 54                       | 97                    | 38:62               |
| 8                          | 3,5-(NO <sub>2</sub> ) <sub>2</sub> -C <sub>6</sub> H <sub>3</sub> CO <sub>2</sub> H | 29                       | 97                    | 39:61               |
| 9                          | 2-NO <sub>2</sub> -4-F-C <sub>6</sub> H <sub>3</sub> CO <sub>2</sub> H               | 43                       | 97                    | 25:75               |
| 10                         | 2-F-4-NO <sub>2</sub> -C <sub>6</sub> H <sub>3</sub> CO <sub>2</sub> H               | 43                       | 96                    | 58:42               |
| 11 <sup>[f]</sup>          | 2-NO <sub>2</sub> -C <sub>6</sub> H <sub>4</sub> CO <sub>2</sub> H                   | 60                       | 98                    | 15:85               |
| 12 <sup>[g]</sup>          | 2-NO <sub>2</sub> -C <sub>6</sub> H <sub>4</sub> CO <sub>2</sub> H                   | 42                       | 98                    | 12:88               |
| 13 <sup>[e, f]</sup>       | 2-NO <sub>2</sub> -C <sub>6</sub> H <sub>4</sub> CO <sub>2</sub> H                   | 48                       | 99                    | 12:88               |
| <b>14<sup>[e, h]</sup></b> | <b>2-NO<sub>2</sub>-C<sub>6</sub>H<sub>4</sub>CO<sub>2</sub>H</b>                    | <b>35</b>                | <b>99</b>             | <b>10:90</b>        |

[a] All reactions were performed with **2a** (0.1 mmol), **1a** (0.2 mmol), **cat. 3b** (20 mol%), and acid (20 mol%) in toluene. [b] Determined by GC analysis. [c] Determined by chiral HPLC analysis. [d] Determined by GC analysis. [e] The reaction was reacted at 30 °C. [f] Acid (40 mol%) was added. [g] Acid (60 mol%) was added. [h] Acid (50 mol%) was added.

**Table S6.** Research on  $\gamma'$ -regioselective *syn*-AVMA reaction<sup>[a]</sup>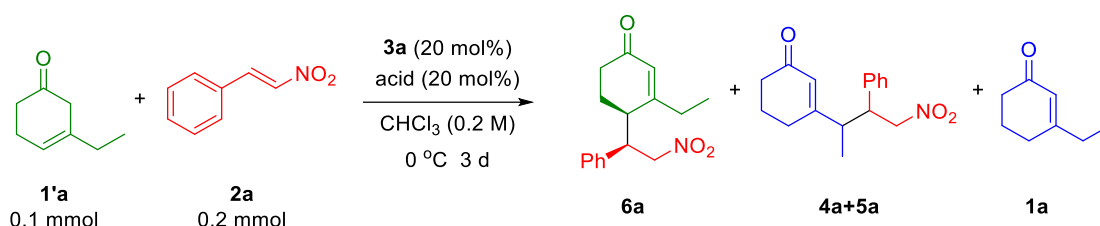

| entry            | acid                                                         | conv. <sup>[b]</sup><br>( <b>6a</b> ) | conv. <sup>[b]</sup><br>( <b>4a+5a</b> ) | conv. <sup>[b]</sup><br>( <b>1a</b> ) | d.r. <sup>[c]</sup> | ee (%) <sup>[d]</sup> |
|------------------|--------------------------------------------------------------|---------------------------------------|------------------------------------------|---------------------------------------|---------------------|-----------------------|
| 1                | $\text{C}_6\text{H}_5\text{CO}_2\text{H}$                    | 86.0                                  | 0                                        | 14.0                                  | >19:1               | 96                    |
| 2                | 4-Me- $\text{C}_6\text{H}_4\text{CO}_2\text{H}$              | 86.3                                  | 0                                        | 13.7                                  | >19:1               | 98                    |
| 3                | 4- $\text{NO}_2$ - $\text{C}_6\text{H}_4\text{CO}_2\text{H}$ | 90.0                                  | 0                                        | trace                                 | >19:1               | 99                    |
| 4                | 4-OH- $\text{C}_6\text{H}_4\text{CO}_2\text{H}$              | 83.4                                  | 0                                        | 16.7                                  | >19:1               | 94                    |
| 5 <sup>[e]</sup> | 4- $\text{NO}_2$ - $\text{C}_6\text{H}_4\text{CO}_2\text{H}$ | 75%                                   | 0                                        | trace                                 | >19:1               | 97                    |
| 6 <sup>[f]</sup> | 4- $\text{NO}_2$ - $\text{C}_6\text{H}_4\text{CO}_2\text{H}$ | <5                                    | 0                                        | trace                                 | N. D.               | N. D.                 |
| 7 <sup>[g]</sup> | 4- $\text{NO}_2$ - $\text{C}_6\text{H}_4\text{CO}_2\text{H}$ | <5                                    | 0                                        | trace                                 | N. D.               | N. D.                 |
| 8 <sup>[h]</sup> | 4- $\text{NO}_2$ - $\text{C}_6\text{H}_4\text{CO}_2\text{H}$ | <5                                    | 0                                        | trace                                 | N. D.               | N. D.                 |

[a] Reactions performed using 1.0 equiv of **1'a** (0.1 mmol, 0.2 M), 2.0 equiv of **2a**, 0.2 equiv of cat. **3a**, and 0.2 equiv of acid in TCM at  $0\text{ }^\circ\text{C}$ . [b] Determined by GC analysis. [c] The dr values were determined by HPLC analysis of the crude reaction mixture. [d] The ee values were determined by chiral HPLC analysis. [e] Toluene (0.2 M) was used as solvent. [f] EtOAc (0.2 M) was used as solvent. [g] MeOH (0.2 M) was used as solvent. [h]  $\text{CH}_3\text{CN}$  (0.2 M) was used as solvent. N. D. = not detected.

**Table S7.** Research on  $\gamma'$ -regioselective *anti*-AVMA reaction<sup>[a]</sup>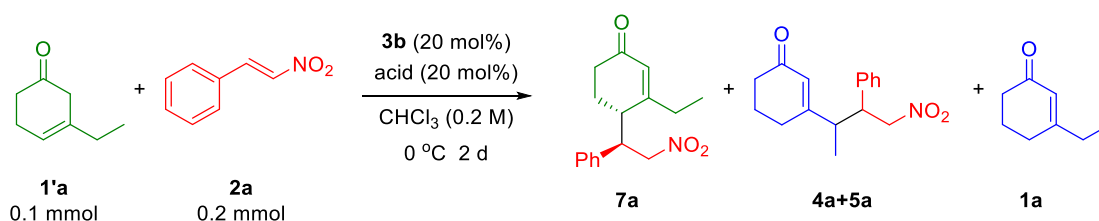

| entry | acid                                      | conv. <sup>[b]</sup><br>( <b>7a</b> ) | conv. <sup>[b]</sup><br>( <b>4a+5a</b> ) | conv. <sup>[b]</sup><br>( <b>1a</b> ) | dr <sup>[c]</sup> | ee (%) <sup>[d]</sup> |
|-------|-------------------------------------------|---------------------------------------|------------------------------------------|---------------------------------------|-------------------|-----------------------|
| 1     | $\text{C}_6\text{H}_5\text{CO}_2\text{H}$ | 0                                     | 35                                       | 55                                    | N. D.             | N. D.                 |

[a] Reactions performed using 1.0 equiv of **1'a** (0.1 mmol, 0.2 M), 2.0 equiv of **2a**, 0.2 equiv of cat. **3b**, and 0.2 equiv of benzoic acid in solvent at  $0\text{ }^\circ\text{C}$ . [b] Determined by GC analysis. N. D. = not detected.

**Table S8.** The effect of temperature on  $\gamma'$ -regioselective *anti*-AVMA reaction<sup>[a]</sup>

| entry | T (°C) | conv. <sup>[b]</sup><br>( <b>7a</b> ) | conv. <sup>[b]</sup><br>( <b>4a+5a</b> ) | conv. <sup>[b]</sup><br>( <b>1a</b> ) | dr <sup>[c]</sup> |
|-------|--------|---------------------------------------|------------------------------------------|---------------------------------------|-------------------|
| 1     | 0      | 23                                    | 20                                       | 25                                    | 1:6               |
| 2     | -20    | 20                                    | 15                                       | trace                                 | 1:7               |

[a] Reactions performed using 1.0 equiv of **1'a** (0.1 mmol, 0.2 M), 2.0 equiv of **2a**, 0.2 equiv of **cat. 3b**, and 0.1 equiv of benzoic acid in solvent TCM. [b] Determined by GC analysis. [c] The dr values were determined by HPLC analysis of the crude reaction mixture.

**Table S9.** The effect of the solvent on  $\gamma'$ -regioselective *anti*-AVMA reaction<sup>[a]</sup>

| entry | solvent        | conv. <sup>[b]</sup> | dr <sup>[c]</sup> |
|-------|----------------|----------------------|-------------------|
| 1     | Toluene        | 0                    | N. D.             |
| 2     | TCM            | 35                   | 1:7               |
| 3     | DCM            | 40                   | 1:10              |
| 4     | THF            | 0                    | N. D.             |
| 5     | DCM/MeOH (1:1) | 0                    | N. D.             |

[a] Reactions performed using 1.0 equiv of **1'a** (0.1 mmol, 0.2 M), 2.0 equiv of **2a**, 0.2 equiv of **cat. 3b**, and 0.1 equiv of benzoic acid in solvent at -20 °C. [b] Determined by GC analysis. [c] The dr values were determined by HPLC analysis of the crude reaction mixture. N. D. = not detected.

**Table S10.** The effect of the acids on  $\gamma'$ -regioselective *anti*-AVMA reaction<sup>[a]</sup>

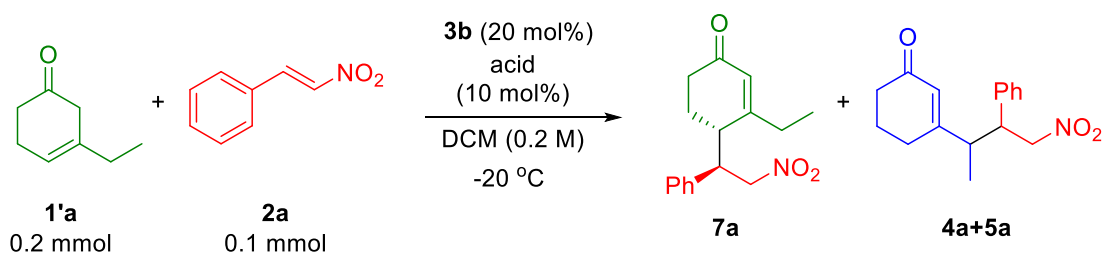

| Entry                   | acid                                                                                 | Time (h)  | conv. ( <b>7a</b> , <b>4a+5a</b> )(%) <sup>[b]</sup> | dr <sup>[c]</sup> | ee (%) <sup>[d]</sup> |
|-------------------------|--------------------------------------------------------------------------------------|-----------|------------------------------------------------------|-------------------|-----------------------|
| 1                       | C <sub>6</sub> H <sub>5</sub> CO <sub>2</sub> H                                      | 36        | 46, 36                                               | 1:8               | 97                    |
| 2                       | 4-MeO-C <sub>6</sub> H <sub>4</sub> CO <sub>2</sub> H                                | 36        | 27, 40                                               | 1:5               | N. D.                 |
| 3                       | 4-NO <sub>2</sub> -C <sub>6</sub> H <sub>4</sub> CO <sub>2</sub> H                   | 36        | 52, 42                                               | 1:8               | N. D.                 |
| 4                       | TsOH                                                                                 | 36        | 50, 42                                               | 1:5               | N. D.                 |
| 5                       | 3,5-(NO <sub>2</sub> ) <sub>2</sub> -C <sub>6</sub> H <sub>3</sub> CO <sub>2</sub> H | 36        | 39, 48                                               | 1:6               | N. D.                 |
| 6                       | CF <sub>3</sub> COOH                                                                 | 36        | 24, 66                                               | 1:4               | N. D.                 |
| 7                       | <i>t</i> Bu-COOH                                                                     | 36        | 58, 34                                               | 1:6               | N. D.                 |
| 8                       | (Ph) <sub>3</sub> COOH                                                               | 36        | 48, 35                                               | 1:5               | N. D.                 |
| 9                       | N-Boc-D-Phg                                                                          | 36        | 50, 41                                               | 1:7               | N. D.                 |
| 10                      | Ph <sub>3</sub> CCOOH                                                                | 36        | 67, 31                                               | 1:7               | N. D.                 |
| 11                      | Ph <sub>3</sub> CCOOH (3 Å MS)                                                       | 36        | 18, 12                                               | 1:9               | N. D.                 |
| 12 <sup>[e]</sup>       | 2,6-( <i>t</i> Bu) <sub>2</sub> -4-Me-C <sub>6</sub> H <sub>2</sub> OH               | 72        | 55, 5                                                | 1:19              | 98                    |
| <b>13<sup>[f]</sup></b> | <b>2,6-(<i>t</i>Bu)<sub>2</sub>-4-Me-C<sub>6</sub>H<sub>2</sub>OH</b>                | <b>72</b> | <b>64, 7</b>                                         | <b>1:19</b>       | <b>98</b>             |
| 14 <sup>[g]</sup>       | 2,6-( <i>t</i> Bu) <sub>2</sub> -4-Me-C <sub>6</sub> H <sub>2</sub> OH               | 72        | 26, 55                                               | 1:19              | N. D.                 |
| 15                      | none                                                                                 | 72        | 37, 7                                                | 1:19              | N. D.                 |

[a] Reactions performed using 1.0 equiv of **2a** (0.1 mmol, 0.2 M), 2.0 equiv of **1'a**, 0.2 equiv of **cat. 3b**, and 0.1 equiv of acid in DCM at -20 °C. [b] Determined by GC analysis. [c] The dr values were determined by HPLC analysis of the crude reaction mixture. [d] The ee values were determined by chiral HPLC analysis. [e] *c* = 0.1 M. [f] *c* = 0.1 M, additive (20 mol%) was added. [g] *c* = 0.1 M, T = 0 °C. N. D. = not detected.

## C: General procedure for $\gamma$ - and $\gamma'$ -regioselective AVMA Reaction

### C1: General procedure for $\gamma$ -anti-AVMA reaction

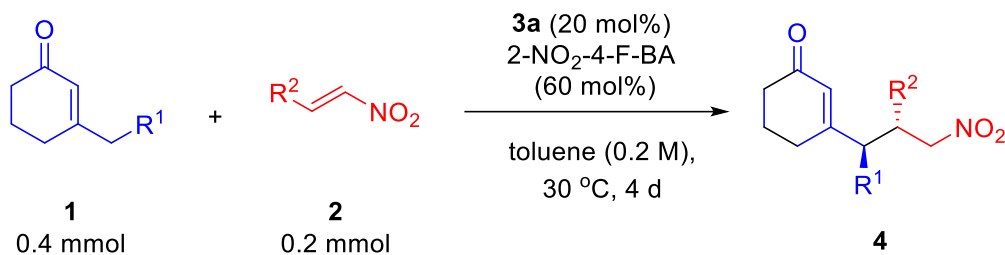

$\beta$ -Alkyl-cyclohex-2-enones **1** (0.4 mmol, 2.0 equiv) and nitroalkenes **2** (0.2 mmol, 1.0 equiv) were added to a solution of catalyst **3a** (0.04 mmol, 0.2 equiv) and 4-fluoro-2-nitro-benzoic acid (0.12 mmol, 0.6 equiv) in toluene (1 mL, 0.2 M). The reaction mixture was stirred at 30 °C for several days. The toluene was removed under vacuum and the residue was purified by silica gel chromatography (PE/EA= 8:1-5:1) to obtain product **4**. The reactions were also catalyzed by racemic **3i** (Table S1) for synthesis of racemic products **4** that used for chiral HPLC analysis.

### C2: General procedure for $\gamma$ -regioselective *syn*-AVMA reaction

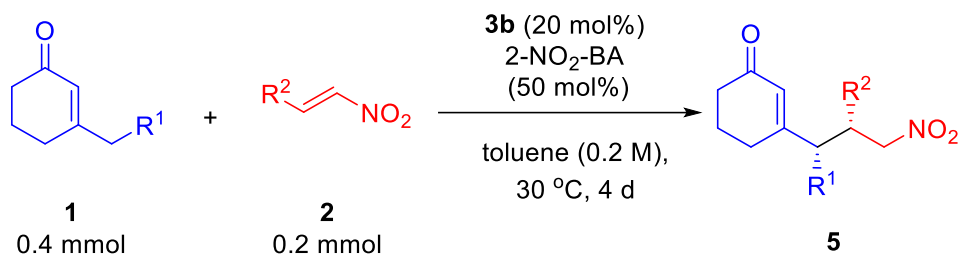

$\beta$ -Alkyl-cyclohex-2-enones **1** (0.4 mmol, 2.0 equiv) and nitroalkenes **2** (0.2 mmol, 1.0 equiv) were added to a solution of catalyst **3b** (0.04 mmol, 0.2 equiv) and 2-nitro-benzoic acid (0.1 mmol, 0.5 equiv) in toluene (1 mL, 0.2 M). The reaction mixture was stirred at 30 °C for several days. The toluene was removed under vacuum and the residue was purified by silica gel chromatography (PE/EA= 8:1-5:1) to obtain product **5**. The reactions were also catalyzed by racemic **3i** (Table S1) for synthesis of racemic products **5** that used for chiral HPLC analysis.

### C3: General procedure for $\gamma'$ -regioselective *syn*-AVMA reaction

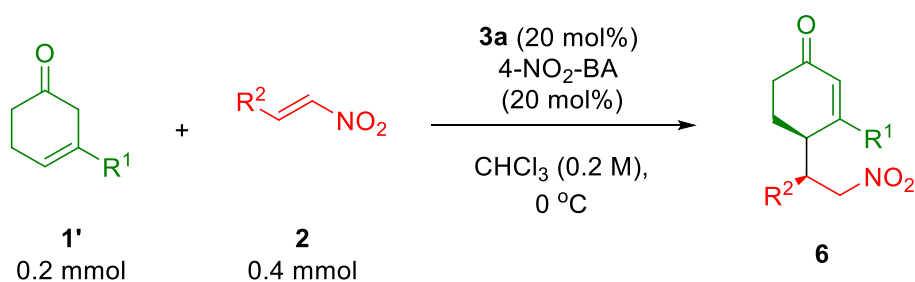

$\beta$ -Substituted-cyclohex-3-enones **1'** (0.2 mmol, 1.0 equiv) and nitroalkenes **2** (0.4 mmol, 2.0 equiv) were added to a solution of catalyst **3a** (0.04 mmol, 0.2 equiv) and 4-nitro-benzoic acid (0.04 mmol,

0.2 equiv) in chloroform (1 mL, 0.2 M). The reaction mixture was stirred at 0 °C for several days. The solvent was removed under vacuum and the residue was purified by silica gel chromatography (PE/EA= 8:1-5:1) to obtain product **6**. The reactions were also catalyzed by racemic **3i** (Table S1) for synthesis of racemic products **6** that used for chiral HPLC analysis.

#### C4: General procedure for $\gamma'$ -regioselective *anti*-AVMA reaction

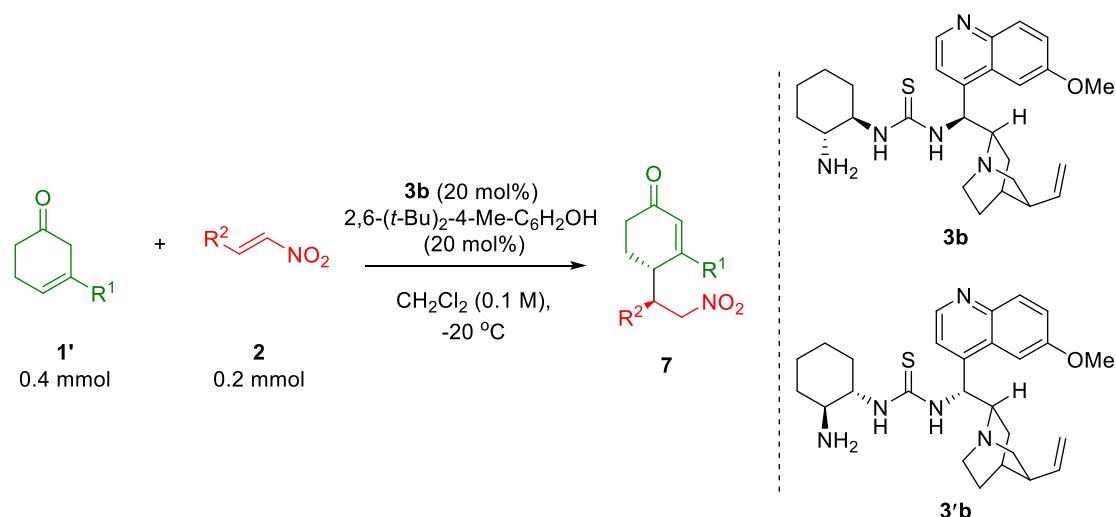

$\beta$ -Substituted -cyclohex-3-enones **1'** (0.4 mmol, 2.0 equiv) and nitroalkenes **2** (0.2 mmol, 1.0 equiv) were added to a solution of catalyst **3b** (0.04 mmol, 0.2 equiv) and 2,6-(*t*-Bu)<sub>2</sub>-4-Me-C<sub>6</sub>H<sub>2</sub>OH (0.04 mmol, 0.2 equiv) in CH<sub>2</sub>Cl<sub>2</sub> (2 mL, 0.1 M). The reaction mixture was stirred at -20 °C for several days. The solvent was removed under vacuum and the residue was purified by silica gel chromatography (PE/EA= 8:1-5:1) to obtain product **7**. For chiral HPLC analysis, the reactions were also conducted under the cat. **3'b** for synthesis of the enantiomers of **7b-7p**, **7r-7s**, and **7u**. Others were procured under the racemic cat. **3i**.

#### C5: Procedure for $\gamma$ -AVMA between $\beta$ -ethyl-cyclohex-2-enone and benzylidenemalononitrile

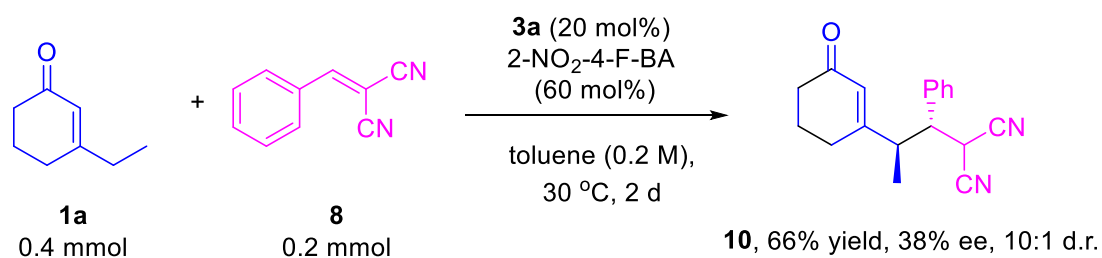

$\beta$ -Ethyl-cyclohex-2-enones **1a** (0.4 mmol, 2.0 equiv) and benzylidenemalononitrile **8** (0.2 mmol, 1.0 equiv) were added to a solution toluene of catalyst **3a** (0.04 mmol, 0.2 equiv) and 4-fluoro-2-nitrobenzoic acid (0.12 mmol, 0.6 equiv) in toluene (1 mL, 0.2 M). The reaction mixture was stirred at 30 °C for 2 days. The toluene was removed under vacuum and the residue was purified by silica gel chromatography (PE/EA= 8:1-5:1) to obtain product **10**. The reactions were also catalyzed by racemic **3i** (Table S1) for synthesis of racemic products **10** that used for chiral HPLC analysis

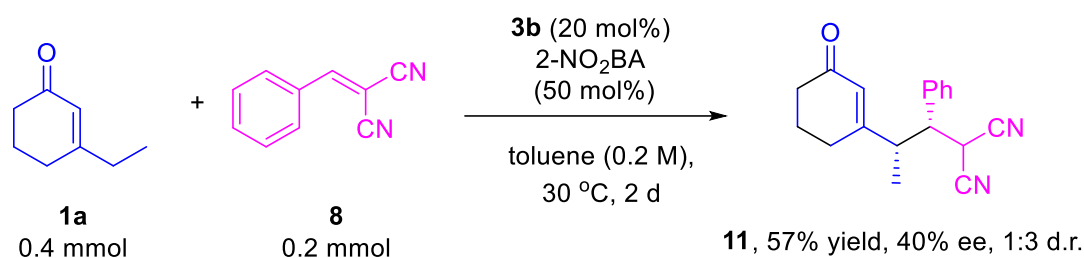

$\beta$ -Ethyl -cyclohex-2-enones **1a** (0.4 mmol, 2.0 equiv) and benzylidenemalononitrile **8** (0.2 mmol, 1.0 equiv) were added to a solution of catalyst **3b** (0.04 mmol, 0.2 equiv) and 2-nitro-benzoic acid (0.1 mmol, 0.5 equiv) in toluene (1 mL, 0.2 M). The reaction mixture was stirred at 30 °C for 2 days. The toluene was removed under vacuum and the residue was purified by silica gel chromatography (PE/EA= 8:1-5:1) to obtain product **11**. The reactions were also catalyzed by racemic **3i** (Table S1) for synthesis of racemic products **11** that used for chiral HPLC analysis

### C6: Procedure for $\gamma'$ -*syn*-AVMA between $\beta$ -styryl-cyclohex-3-enone and *N*-phenyl-maleimide

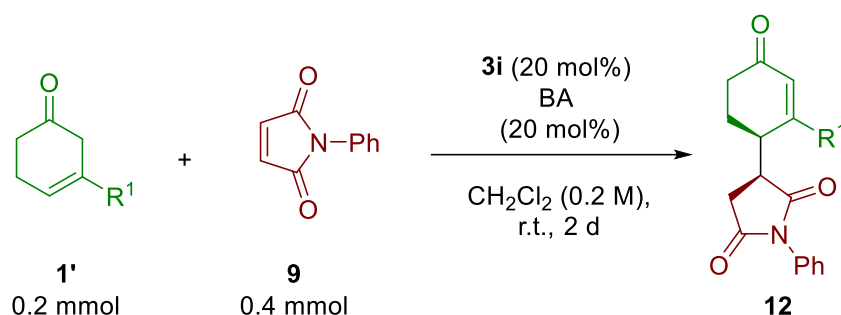

$\beta$ -Substituted-cyclohex-3-enones **1'** (0.2 mmol, 1.0 equiv) and *N*-phenyl-maleimide **9** (0.4 mmol, 2.0 equiv) were added to a solution of catalyst **3i** (0.04 mmol, 0.2 equiv) and benzoic acid (0.04 mmol, 0.2 equiv) in CH<sub>2</sub>Cl<sub>2</sub> (1 mL, 0.2 M). The reaction mixture was stirred at room temperature for 1 days. The solvent was removed under vacuum and the residue was purified by silica gel chromatography (PE/EA= 3:1-1:1) to obtain product **12**. The reactions were also catalyzed by racemic **3i** (Table S1) for synthesis of racemic products **12** that used for chiral HPLC analysis

### C7: Derivation of the adducts

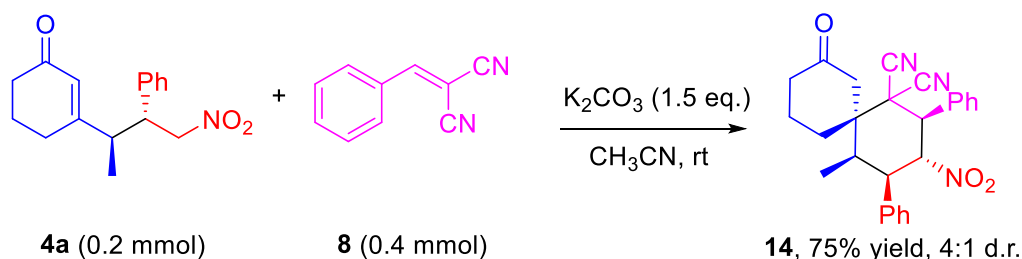

$\gamma$ -*Anti*-adduct **4a** (0.2 mmol, 1.0 equiv), **8** (0.4 mmol, 2.0 equiv) and potassium carbonate (0.3 mmol, 1.5 equiv) were added to CH<sub>3</sub>CN (2 mL, 0.1 M). The reaction mixture was stirred at r.t. for 12 h. The solvent was removed under vacuum and the residue was purified by silica gel chromatography (PE/EA= 6:1-4:1) to obtain product **14**.



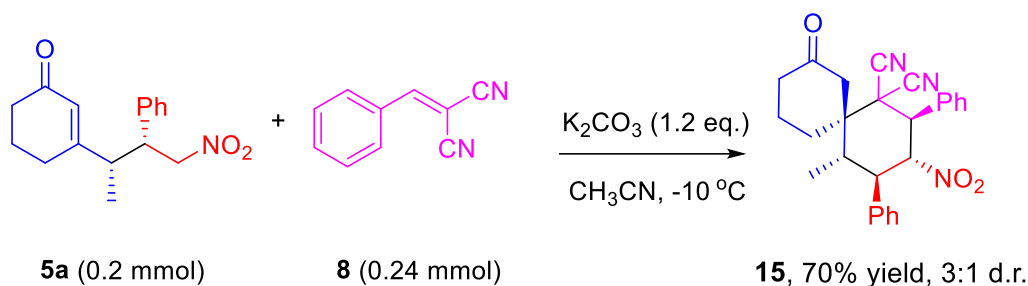

$\gamma$ -*Syn*-adduct **5a** (0.2 mmol, 1.0 equiv), **8** (0.24 mmol, 1.2 equiv) and potassium carbonate (0.24 mmol, 1.2 equiv) were added to CH<sub>3</sub>CN (2 mL, 0.1 M). The reaction mixture was stirred at -10 °C. for 12 h. The solvent was removed under vacuum and the residue was purified by silica gel chromatography (PE/EA= 6:1-4:1) to obtain product **15**.

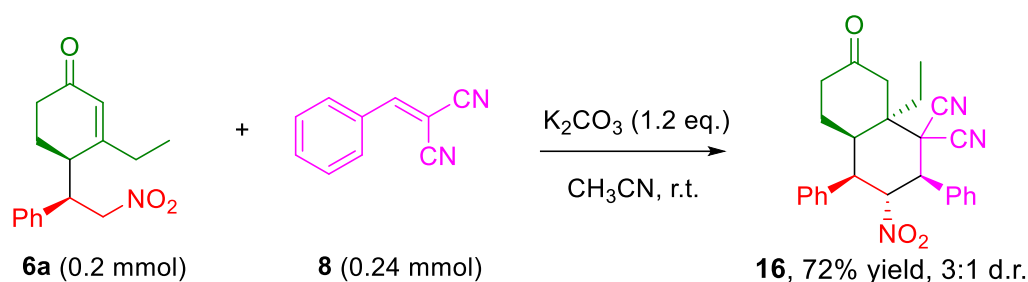

$\gamma'$ -*Syn*-adduct **6a** (0.2 mmol, 1.0 equiv), **8** (0.24 mmol, 1.2 equiv) and potassium carbonate (0.24 mmol, 1.2 equiv) were added to CH<sub>3</sub>CN (2 mL, 0.1 M). The reaction mixture was stirred at r.t. for 12 h. The solvent was removed under vacuum and the residue was purified by silica gel chromatography (PE/EA= 6:1-4:1) to obtain product **16**.

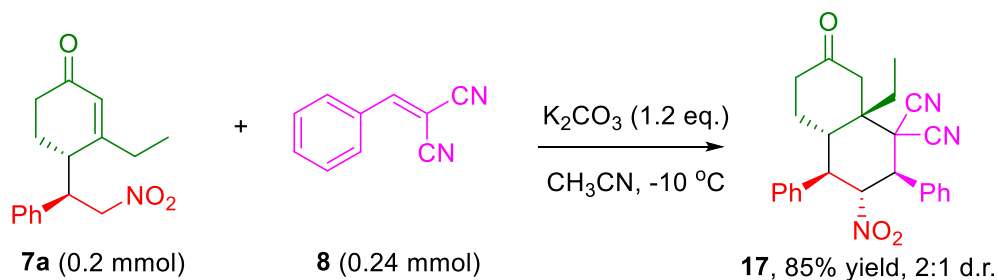

$\gamma'$ -*Anti*-adduct **7a** (0.2 mmol, 1.0 equiv), **8** (0.24 mmol, 1.2 equiv) and potassium carbonate (0.24 mmol, 1.2 equiv) were added to CH<sub>3</sub>CN (2 mL, 0.1 M). The reaction mixture was stirred at -10 °C. for 12 h. The solvent was removed under vacuum and the residue was purified by silica gel chromatography (PE/EA= 6:1-4:1) to obtain product **17**.

## D: Products of $\gamma$ - and $\gamma'$ -regioselective AVMA and [4+2] cycloadducts.

### 4a: 3-((2*R*,3*R*)-4-nitro-3-phenylbutan-2-yl)cyclohex-2-en-1-one

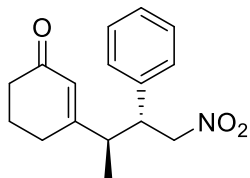

The product was obtained in 77% yield, pale yellow solid. Mp 94-96 °C;  $[\alpha]_D^{25}$  14.6 (*c* 1.00, CH<sub>2</sub>Cl<sub>2</sub>). <sup>1</sup>H NMR (400 MHz, CDCl<sub>3</sub>):  $\delta$  (ppm) 1.25 (d, *J* = 6.8 Hz, 3H), 1.61-1.71 (m, 1H), 1.75-1.84 (m, 1H), 2.08-2.12 (m, 2H), 2.17-2.22 (m, 2H), 2.66-2.74 (m, 1H), 3.54-3.62 (m, 1H), 4.62-4.68 (m, 1H), 4.73-4.78 (m, 1H), 5.74 (s, 1H), 7.10-7.12 (m, 2H), 7.21-7.25 (m, 1H), 7.26-7.31 (m, 2H). <sup>13</sup>C NMR (100 MHz, CDCl<sub>3</sub>):  $\delta$  (ppm) 16.9, 22.5, 27.2, 37.4, 45.2, 48.0, 78.5, 127.4, 127.8, 128.0, 128.9, 137.8, 166.5, 199.5. HRMS (EI): exact mass calculated for [M]<sup>+</sup> (C<sub>16</sub>H<sub>19</sub>NO<sub>3</sub>) requires *m/z* 273.1365, found *m/z* 273.1366. The enantiomeric ratio was determined by Daicel Chiralpak IA (25 cm), *n*-Hexane / EtOH = 9/1, 1.0 mL/min,  $\lambda$  = 254 nm, 19.90 min (major), 24.98 min (minor), ee = 92%.

### 4b: 3-((2*R*,3*R*)-4-nitro-3-(*p*-tolyl)butan-2-yl)cyclohex-2-en-1-one

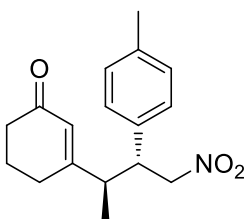

The product was obtained in 79% yield, yellow oil.  $[\alpha]_D^{25}$  12.6 (*c* 1.00, CH<sub>2</sub>Cl<sub>2</sub>). <sup>1</sup>H NMR (400 MHz, CDCl<sub>3</sub>):  $\delta$  (ppm) 1.24 (d, *J* = 6.8 Hz, 3H), 1.65-1.73 (m, 1H), 1.77-1.86 (m, 1H), 2.10-2.13 (m, 2H), 2.19-2.22 (m, 2H), 2.28 (s, 3H), 2.65-2.72 (m, 1H), 3.51-3.57 (m, 1H), 4.59-4.65 (m, 1H), 4.71-4.75 (m, 1H), 5.74 (s, 1H), 6.99 (d, *J* = 8.4 Hz, 2H), 7.07 (d, *J* = 8.0 Hz, 2H). <sup>13</sup>C NMR (100 MHz, CDCl<sub>3</sub>):  $\delta$  (ppm) 16.9, 21.1, 22.5, 27.2, 37.4, 45.2, 47.6, 78.7, 127.4, 127.6, 129.6, 134.6, 137.6, 166.9, 199.7. HRMS (EI): exact mass calculated for [M]<sup>+</sup> (C<sub>17</sub>H<sub>21</sub>NO<sub>3</sub>) requires *m/z* 287.1521, found *m/z* 287.1524. The enantiomeric ratio was determined by Daicel Chiralpak IA (25 cm), *n*-Hexane / EtOH = 9/1, 1.0 mL/min,  $\lambda$  = 254 nm, 16.29 min (major), 18.59 min (minor), ee = 92%.

### 4c: 3-((2*R*,3*R*)-3-(4-methoxyphenyl)-4-nitrobutan-2-yl)cyclohex-2-en-1-one

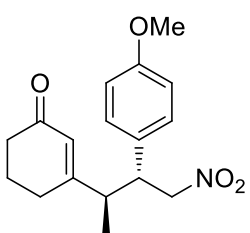

The product was obtained in 73% yield, yellow solid. Mp 98-101 °C;  $[\alpha]_D^{25}$  36.4 (*c* 1.00, CH<sub>2</sub>Cl<sub>2</sub>). <sup>1</sup>H NMR (400 MHz, CDCl<sub>3</sub>):  $\delta$  (ppm) 0.92 (d, *J* = 7.2 Hz, 3H), 2.00-2.11 (m, 2H), 2.37-2.45 (m, 4H), 2.53-2.61 (m, 1H), 3.41-3.47 (m, 1H), 3.79 (s, 3H), 4.47-4.54 (m, 2H), 5.97 (s, 1H), 6.86-6.88 (m, 2H), 7.08-7.11 (m, 2H). <sup>13</sup>C NMR (100 MHz, CDCl<sub>3</sub>):  $\delta$  (ppm) 17.3, 22.8, 26.1, 37.6, 45.5, 46.8, 55.3, 79.7, 114.4, 127.5, 129.0, 159.3, 166.4, 199.3. HRMS (EI): exact mass calculated for [M]<sup>+</sup> (C<sub>17</sub>H<sub>21</sub>NO<sub>4</sub>) requires *m/z* 303.1471, found *m/z* 303.1473. The enantiomeric ratio was determined by Daicel Chiralpak IA (25 cm), *n*-Hexane / EtOH = 9/1, 1.0 mL/min,  $\lambda$  = 254 nm, 24.37 min (major), 27.07 min (minor), ee = 93%.

### 4d: 3-((2*R*,3*R*)-3-(4-fluorophenyl)-4-nitrobutan-2-yl)cyclohex-2-en-1-one

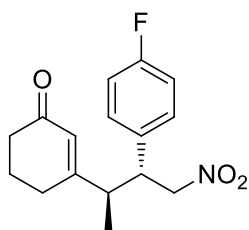

The product was obtained in 72% yield, yellow oil.  $[\alpha]_D^{25}$  13.8 (*c* 1.00, CH<sub>2</sub>Cl<sub>2</sub>). <sup>1</sup>H NMR (400 MHz, CDCl<sub>3</sub>):  $\delta$  (ppm) 1.26 (d, *J* = 6.8 Hz, 3H), 1.63-1.71 (m, 1H), 1.78-1.87 (m, 1H), 2.09-2.11 (m, 2H), 2.20-2.23 (m, 2H), 2.63-2.71 (m, 1H), 3.54-3.60 (m, 1H), 4.58-4.63 (m, 1H), 4.73-4.78 (m, 1H), 5.73 (s, 1H), 6.97-7.01 (m, 2H), 7.08-7.12 (m, 2H). <sup>13</sup>C NMR (100 MHz, CDCl<sub>3</sub>):  $\delta$  (ppm) 17.0, 22.5, 27.2, 37.3, 45.2, 47.3, 78.6, 115.8, 116.0, 127.5, 129.4, 129.4, 133.5, 133.6, 166.5,

199.7. HRMS (EI): exact mass calculated for [M]<sup>+</sup> (C<sub>16</sub>H<sub>18</sub>FNO<sub>3</sub>) requires *m/z* 291.1271, found *m/z* 291.1269. The enantiomeric ratio was determined by Daicel Chiralpak IA (25 cm), *n*-Hexane / EtOH = 9/1, 1.0 mL/min,  $\lambda$  = 254 nm, 22.55 min (major), 28.53 min (minor), ee = 93%.

#### 4e: 3-((2R,3R)-3-(4-chlorophenyl)-4-nitrobutan-2-yl)cyclohex-2-en-1-one

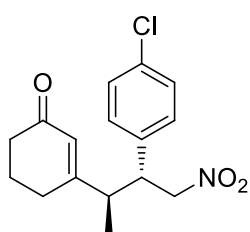

The product was obtained in 69% yield, yellow solid. Mp 64-66°C;  $[\alpha]_D^{25}$  12.1 (*c* 1.00, CH<sub>2</sub>Cl<sub>2</sub>). <sup>1</sup>H NMR (400 MHz, CDCl<sub>3</sub>):  $\delta$  (ppm) 1.26 (d, *J* = 6.8 Hz, 3H), 1.64-1.71 (m, 1H), 1.79-1.88 (m, 1H), 2.10-2.11 (m, 2H), 2.21-2.24 (m, 2H), 2.64-2.71 (m, 1H), 3.54-3.60 (m, 1H), 4.58-4.63 (m, 1H), 4.73-4.77 (m, 1H), 5.74 (s, 1H), 7.07 (d, *J* = 8.4 Hz, 2H), 7.27 (d, *J* = 8.4 Hz, 2H). <sup>13</sup>C NMR (100 MHz, CDCl<sub>3</sub>):  $\delta$  (ppm) 16.9, 22.5, 27.2, 37.3, 45.0, 47.3, 78.4, 127.5,

129.1, 133.9, 136.4, 166.0, 199.4. HRMS (EI): exact mass calculated for [M]<sup>+</sup> (C<sub>16</sub>H<sub>18</sub>ClNO<sub>3</sub>) requires *m/z* 307.0975, found *m/z* 307.0973. The enantiomeric ratio was determined by Daicel Chiralpak IA (25 cm), *n*-Hexane / EtOH = 9/1, 1.0 mL/min,  $\lambda$  = 254 nm, 24.56 min (major), 31.53 min (minor), ee = 94%.

#### 4f: 3-((2R,3R)-3-(4-bromophenyl)-4-nitrobutan-2-yl)cyclohex-2-en-1-one

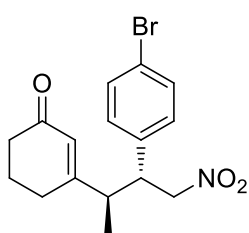

The product was obtained in 65% yield, yellow oil.  $[\alpha]_D^{25}$  11.0 (*c* 1.00, CH<sub>2</sub>Cl<sub>2</sub>). <sup>1</sup>H NMR (400 MHz, CDCl<sub>3</sub>):  $\delta$  (ppm) 1.26 (d, *J* = 6.8 Hz, 3H), 1.68-1.75 (m, 1H), 1.79-1.89 (m, 1H), 2.11-2.12 (m, 2H), 2.21-2.25 (m, 2H), 2.64-2.71 (m, 1H), 3.53-3.59 (m, 1H), 4.57-4.63 (m, 1H), 4.72-4.77 (m, 1H), 5.74 (s, 1H), 7.00 (d, *J* = 8.0 Hz, 2H), 7.43 (d, *J* = 8.4 Hz, 2H). <sup>13</sup>C NMR (100 MHz, CDCl<sub>3</sub>):  $\delta$  (ppm) 16.9, 22.5, 27.2, 37.3, 45.0, 47.4, 78.3, 122.0, 127.5, 129.5, 132.1, 136.9, 166.4,

199.7. HRMS (EI): exact mass calculated for [M]<sup>+</sup> (C<sub>16</sub>H<sub>18</sub>BrNO<sub>3</sub>) requires *m/z* 351.0470, found *m/z* 351.0469. The enantiomeric ratio was determined by Daicel Chiralpak IA (25 cm), *n*-Hexane / EtOH = 9/1, 1.0 mL/min,  $\lambda$  = 254 nm, 16.26 min (major), 16.38 min (minor), ee = 93%.

#### 4g: 3-((2R,3R)-4-nitro-3-(3-nitrophenyl)butan-2-yl)cyclohex-2-en-1-one

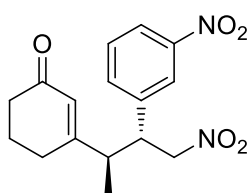

The product was obtained in 58% yield, yellow oil.  $[\alpha]_D^{25}$  4.0 (*c* 1.00, CH<sub>2</sub>Cl<sub>2</sub>). <sup>1</sup>H NMR (400 MHz, CDCl<sub>3</sub>):  $\delta$  (ppm) 1.30 (d, *J* = 6.8 Hz, 3H), 1.67-1.76 (m, 1H), 1.84-1.90 (m, 1H), 2.17-2.24 (m, 4H), 2.72-2.80 (m, 1H), 3.71-3.77 (m, 1H), 5.73 (s, 1H), 7.48-7.52 (m, 2H), 8.05 (s, 1H), 8.10-8.15 (m, 1H). <sup>13</sup>C NMR (100 MHz, CDCl<sub>3</sub>):  $\delta$  (ppm) 16.8, 22.5, 27.2, 37.3, 45.0, 47.4, 77.9, 122.5, 123.2,

127.8, 130.1, 134.0, 140.2, 148.4, 165.0, 199.0. HRMS (EI): exact mass calculated for  $[M]^+$  ( $C_{16}H_{18}N_2O_5$ ) requires  $m/z$  318.1216, found  $m/z$  318.1217. The enantiomeric ratio was determined by Daicel Chiralpak IA (25 cm), *n*-Hexane / EtOH = 9/1, 1.0 mL/min,  $\lambda$  = 254 nm, 34.80 min (major), 73.83 min (minor), ee = 91%.

**4h: 3-((2*R*,3*R*)-3-(naphthalen-2-yl)-4-nitrobutan-2-yl)cyclohex-2-en-1-one**

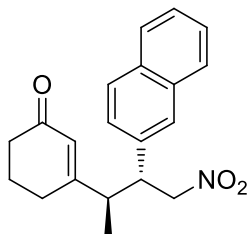

The product was obtained in 84% yield, yellow solid. Mp 94-95°C;  $[\alpha]_D^{25}$  32.5 (*c* 1.00,  $CH_2Cl_2$ ).  $^1H$  NMR (400 MHz,  $CDCl_3$ ):  $\delta$  (ppm) 1.28 (d,  $J$  = 6.8 Hz, 3H), 1.55-1.66 (m, 1H), 1.70-1.80 (m, 1H), 2.11-2.15 (m, 4H), 2.77-2.85 (m, 1H), 3.73-3.79 (m, 1H), 4.72-4.83 (m, 2H), 5.78 (s, 1H), 7.23-7.25 (m, 1H), 7.43-7.49 (m, 2H), 7.56 (s, 1H), 7.42-7.79 (m, 3H).  $^{13}C$  NMR (100 MHz,  $CDCl_3$ ):  $\delta$  (ppm) 16.8, 22.5, 27.3, 37.3, 45.1, 48.0, 78.4, 124.9, 126.4, 126.6, 127.2, 127.4, 127.7,

127.8, 128.9, 132.8, 133.2, 135.2, 166.4, 199.4. HRMS (EI): exact mass calculated for  $[M]^+$  ( $C_{20}H_{21}NO_3$ ) requires  $m/z$  323.1521, found  $m/z$  323.1524. The enantiomeric ratio was determined by Daicel Chiralpak IA (25 cm), *n*-Hexane / EtOH = 9/1, 1.0 mL/min,  $\lambda$  = 254 nm, 20.96 min (major), 24.24 min (minor), ee = 93%.

**4i: 3-((2*R*,3*S*)-3-(furan-2-yl)-4-nitrobutan-2-yl)cyclohex-2-en-1-one**

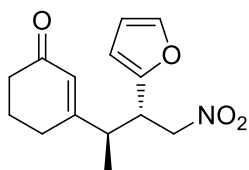

The product was obtained in 80% yield, yellow solid. Mp 58-59°C;  $[\alpha]_D^{25}$  19.5 (*c* 1.00,  $CH_2Cl_2$ ).  $^1H$  NMR (400 MHz,  $CDCl_3$ ):  $\delta$  (ppm) 1.20 (d,  $J$  = 6.8 Hz, 3H), 1.84-1.96 (m, 2H), 2.13-2.21 (m, 2H), 2.29-2.33 (m, 2H), 2.76-2.83 (m, 1H), 3.74-3.79 (m, 1H), 4.60-4.73 (m, 2H), 5.80 (s, 1H), 6.13 (d,  $J$  = 3.2 Hz, 1H), 6.26-6.28 (m, 1H), 7.32-7.33 (m, 1H).  $^{13}C$  NMR (100 MHz,  $CDCl_3$ ):  $\delta$  (ppm)

16.0, 22.7, 27.1, 37.5, 41.5, 43.4, 76.0, 108.2, 110.5, 127.1, 142.5, 150.8, 165.7, 199.5. HRMS (EI): exact mass calculated for  $[M]^+$  ( $C_{14}H_{17}NO_4$ ) requires  $m/z$  263.1158, found  $m/z$  263.1159. The enantiomeric ratio was determined by Daicel Chiralpak IA (25 cm), *n*-Hexane / EtOH = 9/1, 1.0 mL/min,  $\lambda$  = 254 nm, 18.57 min (major), 28.77 min (minor), ee = 91%.

**4j: 3-((2*R*,3*R*)-1-nitro-2-phenylpentan-3-yl)cyclohex-2-en-1-one**

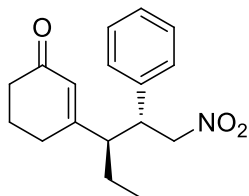

The product was obtained in 72% yield, yellow solid. Mp 72-74°C;  $[\alpha]_D^{25}$  31.1 (*c* 1.00,  $CH_2Cl_2$ ).  $^1H$  NMR (400 MHz,  $CDCl_3$ ):  $\delta$  (ppm) 0.88 (t,  $J$  = 7.2 Hz, 3H), 1.52-1.64 (m, 2H), 1.69-1.79 (m, 2H), 1.98-2.01 (m, 2H), 2.16-2.19 (m, 2H), 2.43-2.50 (m, 1H), 3.54-3.60 (m, 1H), 4.60-4.66 (m, 1H), 4.79-4.83 (m, 1H), 5.72 (s, 1H), 7.08-7.10 (m, 2H), 7.20-7.24 (m, 1H), 7.25-7.29 (m, 2H).  $^{13}C$  NMR

(100 MHz,  $CDCl_3$ ):  $\delta$  (ppm) 12.1, 22.4, 23.7, 27.2, 37.4, 47.5, 52.8, 79.2, 128.0, 128.0, 128.8, 129.3, 137.7, 164.7, 199.4. HRMS (ESI): exact mass calculated for  $[M+H]^+$  ( $C_{17}H_{21}NO_3$ ) requires  $m/z$  287.1521, found  $m/z$  287.1523. The enantiomeric ratio was determined by Daicel Chiralpak IA (25 cm), *n*-Hexane / EtOH = 9/1, 0.5 mL/min,  $\lambda$  = 254 nm, 29.08 min (major), 34.08 min (minor), ee = 93%.

#### 4k: 3-((2R,3R)-1-nitro-2-phenylhexan-3-yl)cyclohex-2-en-1-one

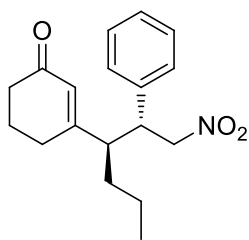

The product was obtained in 65% yield, yellow oil.  $[\alpha]_D^{25}$  53.8 (*c* 1.00, CH<sub>2</sub>Cl<sub>2</sub>). <sup>1</sup>H NMR (400 MHz, CDCl<sub>3</sub>):  $\delta$  (ppm) 0.91-0.94 (m, 3H), 1.13-1.24 (m, 1H), 1.28-1.37 (m, 1H), 1.54-1.65 (m, 4H), 1.69-1.78 (m, 1H), 1.99-2.01 (m, 2H), 2.15-2.18 (m, 1H), 2.52-2.59 (m, 1H), 3.53-3.59 (m, 1H), 4.60-4.66 (m, 1H), 4.79-4.84 (m, 1H), 5.70 (s, 1H), 7.08-7.10 (m, 2H), 7.20-7.25 (m, 2H), 7.27-7.29 (m, 1H). <sup>13</sup>C NMR (100 MHz, CDCl<sub>3</sub>):  $\delta$  (ppm) 14.0, 20.8, 22.4, 27.1, 32.9, 37.5, 47.6, 50.9, 79.2, 128.0, 128.8, 129.2, 137.7, 164.7, 199.2. HRMS (EI): exact mass calculated for [M]<sup>+</sup> (C<sub>18</sub>H<sub>23</sub>NO<sub>3</sub>) requires *m/z* 301.1678, found *m/z* 301.1675. The enantiomeric ratio was determined by Daicel Chiralpak AS (25 cm), *n*-Hexane / EtOH = 7/3, 0.55 mL/min,  $\lambda$  = 254 nm, 24.18 min (major), 28.57 min (minor), ee = 92%.

#### 4l: 3-((2R,3R)-1-nitro-2-phenylheptan-3-yl)cyclohex-2-en-1-one

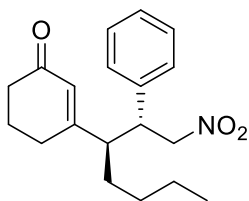

The product was obtained in 63% yield, yellow oil.  $[\alpha]_D^{25}$  128.2 (*c* 1.00, CH<sub>2</sub>Cl<sub>2</sub>). <sup>1</sup>H NMR (400 MHz, CDCl<sub>3</sub>):  $\delta$  (ppm) 0.87-0.91 (m, 3H), 1.12-1.40 (m, 4H), 1.60-1.79 (m, 4H), 1.98-2.01 (m, 2H), 2.15-2.19 (m, 2H), 2.50-2.56 (m, 1H), 3.53-3.59 (m, 1H), 4.60-4.66 (m, 1H), 4.79-4.83 (m, 1H), 5.70 (s, 1H), 7.08-7.10 (m, 2H), 7.20-7.25 (m, 2H), 7.27-7.29 (m, 1H). <sup>13</sup>C NMR (100 MHz, CDCl<sub>3</sub>):  $\delta$  (ppm) 13.9, 22.4, 22.6, 27.1, 29.8, 29.8, 30.5, 37.5, 47.6, 51.2, 79.2, 128.0, 128.8, 129.2, 137.7, 164.8, 199.2. HRMS (EI): exact mass calculated for [M]<sup>+</sup> (C<sub>19</sub>H<sub>25</sub>NO<sub>3</sub>) requires *m/z* 315.1834, found *m/z* 315.1832. The enantiomeric ratio was determined by Daicel Chiralpak IA (25 cm), *n*-Hexane / EtOH = 19/1, 1.0 mL/min,  $\lambda$  = 254 nm, 15.03 min (major), 16.39 min (minor), ee = 94%.

#### 4m: 3-((2R,3R)-1-nitro-2-phenyloctan-3-yl)cyclohex-2-en-1-one

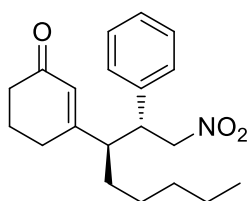

The product was obtained in 67% yield, yellow oil.  $[\alpha]_D^{25}$  29.7 (*c* 1.00, CH<sub>2</sub>Cl<sub>2</sub>). <sup>1</sup>H NMR (400 MHz, CDCl<sub>3</sub>):  $\delta$  0.86-0.89 (m, 3H), 1.16-1.30 (m, 6H), 1.54-1.64 (m, 3H), 1.70-1.78 (m, 1H), 1.98-2.01 (m, 2H), 2.15-2.18 (m, 2H), 2.50-2.56 (m, 1H), 3.52-3.58 (m, 1H), 4.60-4.66 (m, 1H), 4.79-4.83 (m, 1H), 5.70 (s, 1H), 7.07-7.10 (m, 2H), 7.20-7.29 (m, 3H). <sup>13</sup>C NMR (100 MHz, CDCl<sub>3</sub>):  $\delta$  (ppm) 14.0, 22.4, 22.5, 27.1, 27.3, 30.7, 31.7, 37.5, 47.6, 51.2, 79.2, 128.0, 128.8, 129.2, 137.7, 164.8, 199.2. HRMS (EI): exact mass calculated for [M]<sup>+</sup> (C<sub>20</sub>H<sub>27</sub>NO<sub>3</sub>) requires *m/z* 329.1991, found *m/z* 329.1994. The enantiomeric ratio was determined by Daicel Chiralpak AD (25 cm), *n*-Hexane / EtOH = 19/1, 0.8 mL/min,  $\lambda$  = 254 nm, 22.43 min (major), 25.26 min (minor), ee = 93%.

#### 4n: 3-((1R,2R)-3-nitro-1,2-diphenylpropyl)cyclohex-2-en-1-one

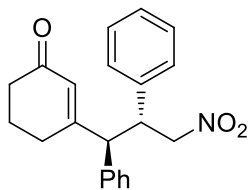

The product was obtained in 69% yield, yellow oil.  $[\alpha]_D^{25}$  12.5 ( $c$  1.00,  $\text{CH}_2\text{Cl}_2$ ).  $^1\text{H}$  NMR (400 MHz,  $\text{CDCl}_3$ ):  $\delta$  (ppm) 1.49-1.59 (m, 1H), 1.68-1.76 (m, 1H), 2.00-2.12 (m, 3H), 2.18-2.45 (m, 1H), 3.79 (d,  $J$  = 12.0 Hz, 1H), 4.15-4.22 (m, 1H), 4.38-4.49 (m, 2H), 5.93 (s, 1H), 7.25-7.27 (m, 3H), 7.30-7.44 (m, 7H).  $^{13}\text{C}$  NMR (100 MHz,  $\text{CDCl}_3$ ):  $\delta$  (ppm) 22.4, 27.8, 37.1, 46.0, 56.5, 79.8, 127.6, 127.9, 128.0, 128.2, 128.4, 129.1, 129.6, 137.2, 137.8, 163.5, 199.3. HRMS (EI): exact mass calculated for  $[\text{M}]^+$  ( $\text{C}_{21}\text{H}_{21}\text{NO}_3$ ) requires  $m/z$  335.1521, found  $m/z$  335.1521. The enantiomeric ratio was determined by Daicel Chiralpak IB (25 cm),  $n$ -Hexane / EtOH = 7/3, 0.9 mL/min,  $\lambda$  = 220 nm, 10.05 min (minor), 15.31 min (major), ee = 99%.

#### 4o: 3-((2R,3R)-4-nitro-1,3-diphenylbutan-2-yl)cyclohex-2-en-1-one

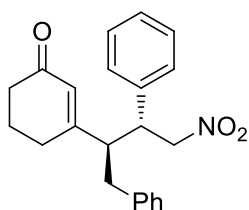

The product was obtained in 58% yield, yellow solid. Mp 101-103°C;  $[\alpha]_D^{25}$  45.2 ( $c$  1.00,  $\text{CH}_2\text{Cl}_2$ ).  $^1\text{H}$  NMR (400 MHz,  $\text{CDCl}_3$ ):  $\delta$  (ppm) 1.42-1.56 (m, 2H), 1.65-1.72 (m, 1H), 1.84-1.92 (m, 1H), 2.01-2.04 (m, 2H), 2.75-2.81 (m, 1H), 2.88-2.94 (m, 1H), 3.09-3.13 (m, 1H), 3.66-3.73 (m, 1H), 4.69-4.74 (m, 1H), 4.86-4.90 (m, 1H), 5.67 (s, 1H), 7.10-7.13 (m, 4H), 7.18-7.25 (m, 3H), 7.26-7.31 (m, 3H).  $^{13}\text{C}$  NMR (100 MHz,  $\text{CDCl}_3$ ):  $\delta$  (ppm) 22.1, 28.8, 37.2, 37.8, 47.6, 52.4, 79.0, 126.8, 128.1, 128.7, 128.8, 129.2, 137.4, 138.0, 164.3, 198.9. HRMS (EI): exact mass calculated for  $[\text{M}]^+$  ( $\text{C}_{22}\text{H}_{23}\text{NO}_3$ ) requires  $m/z$  349.1678, found  $m/z$  349.1682. The enantiomeric ratio was determined by Daicel Chiralpak IA (25 cm),  $n$ -Hexane / EtOH = 19/1, 1.0 mL/min,  $\lambda$  = 254 nm, 19.80 min (major), 22.48 min (minor), ee = 99%.

#### 4p: 3-((2R,3R)-2-(4-bromophenyl)-1-nitrohexan-3-yl)cyclohex-2-en-1-one

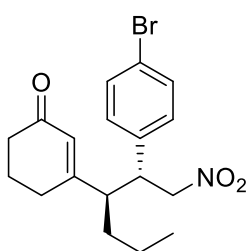

The product was obtained in 78% yield, yellow solid. Mp 99-101°C;  $[\alpha]_D^{25}$  40.5 ( $c$  1.00,  $\text{CH}_2\text{Cl}_2$ ).  $^1\text{H}$  NMR (400 MHz,  $\text{CDCl}_3$ ):  $\delta$  (ppm) 0.90-0.94 (t,  $J$  = 7.2 Hz, 3H), 1.13-1.31 (m, 2H), 1.54-1.65 (m, 3H), 1.74-1.80 (m, 1H), 2.00-2.03 (m, 2H), 2.18-2.21 (m, 2H), 2.49-2.56 (m, 1H), 3.50-3.56 (m, 1H), 4.55-4.61 (m, 1H), 4.78-4.82 (m, 1H), 5.72 (s, 1H), 6.98 (d,  $J$  = 8 Hz, 2H), 7.42 (m,  $J$  = 8 Hz, 2H).  $^{13}\text{C}$  NMR (100 MHz,  $\text{CDCl}_3$ ):  $\delta$  (ppm) 12.9, 19.7, 21.4, 26.1, 31.9, 36.4, 46.0, 49.6, 77.9, 120.9, 128.2, 128.6, 131.0, 135.8, 163.1, 198.0. HRMS (EI): exact mass calculated for  $[\text{M}]^+$  ( $\text{C}_{18}\text{H}_{22}\text{BrNO}_3$ ) requires  $m/z$  379.0783, found  $m/z$  379.0784. The enantiomeric ratio was determined by Daicel Chiralpak IA (25 cm),  $n$ -Hexane / EtOH = 9/1, 0.95 mL/min,  $\lambda$  = 220 nm, 12.43 min (major), 13.32 min (minor), ee = 95%.

#### 5a: 3-((2S,3R)-4-nitro-3-phenylbutan-2-yl)cyclohex-2-en-1-one

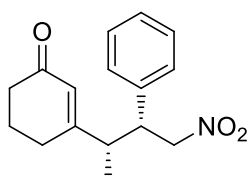

The product was obtained in 68% yield, pale yellow solid. Mp 138-140°C;  $[\alpha]_D^{25}$  38.3 ( $c$  1.00,  $\text{CH}_2\text{Cl}_2$ ).  $^1\text{H}$  NMR (400 MHz,  $\text{CDCl}_3$ ):  $\delta$  (ppm) 0.92 (d,  $J$  = 6.8 Hz, 3H), 2.00-2.12 (m, 2H), 2.33-2.49 (m, 4H), 2.58-2.65 (m, 1H), 3.46-3.53 (m, 1H), 4.49-4.59 (m, 2H), 5.98 (s, 1H), 7.18 (m, 2H), 7.28-7.37 (m, 3H).  $^{13}\text{C}$  NMR (100

MHz, CDCl<sub>3</sub>):  $\delta$  (ppm) 17.4, 22.8, 26.1, 37.6, 45.4, 47.4, 79.5, 127.5, 128.0, 128.2, 129.1, 137.3, 166.2, 199.3. HRMS (EI): exact mass calculated for [M]<sup>+</sup> (C<sub>16</sub>H<sub>19</sub>NO<sub>3</sub>) requires  $m/z$  273.1365, found  $m/z$  273.1367. The enantiomeric ratio was determined by Daicel Chiralpak IA (25 cm), *n*-Hexane / EtOH = 9/1, 1.0 mL/min,  $\lambda$  = 254 nm, 15.80 min (minor), 23.33 min (major), ee = 99%.

### 5b: 3-((2*S*,3*R*)-4-nitro-3-(*p*-tolyl)butan-2-yl)cyclohex-2-en-1-one

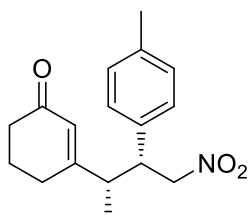

The product was obtained in 76% yield, pale yellow solid. Mp 145-147 °C; [ $\alpha$ ]<sub>D</sub><sup>25</sup> 45.1 (*c* 1.00, CH<sub>2</sub>Cl<sub>2</sub>). <sup>1</sup>H NMR (400 MHz, CDCl<sub>3</sub>):  $\delta$  (ppm) 0.92 (d, *J* = 6.8 Hz, 3H), 1.99-2.11 (m, 2H), 2.33 (s, 3H), 2.38-2.45 (m, 4H), 2.55-2.63 (m, 1H), 3.42-3.49 (m, 1H), 4.47-4.56 (m, 2H), 5.97 (s, 1H), 7.06 (d, *J* = 8.0 Hz, 2H), 7.15 (d, *J* = 8.0 Hz, 2H). <sup>13</sup>C NMR (100 MHz, CDCl<sub>3</sub>):  $\delta$  (ppm) 17.3, 21.1, 22.8, 26.1, 37.6, 45.4, 47.1, 79.6, 127.5, 127.8, 129.7, 134.1, 137.9, 166.4, 199.3. HRMS

(EI): exact mass calculated for [M]<sup>+</sup> (C<sub>17</sub>H<sub>21</sub>NO<sub>3</sub>) requires  $m/z$  287.1521, found  $m/z$  287.1522. The enantiomeric ratio was determined by Daicel Chiralpak IA (25 cm), *n*-Hexane / EtOH = 9/1, 1.0 mL/min,  $\lambda$  = 254 nm, 14.67 min (minor), 24.36 min (major), ee = 98%.

### 5c: 3-((2*S*,3*R*)-3-(4-methoxyphenyl)-4-nitrobutan-2-yl)cyclohex-2-en-1-one

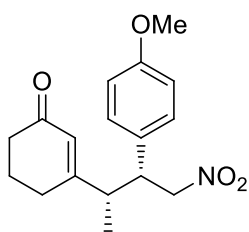

The product was obtained in 63% yield, pale yellow solid. Mp 136-138 °C; [ $\alpha$ ]<sub>D</sub><sup>25</sup> 53.3 (*c* 1.00, CH<sub>2</sub>Cl<sub>2</sub>). <sup>1</sup>H NMR (400 MHz, CDCl<sub>3</sub>):  $\delta$  (ppm) 0.92 (d, *J* = 6.8 Hz, 3H), 1.98-2.13 (m, 2H), 2.37-2.46 (m, 4H), 2.53-2.61 (m, 1H), 3.41-3.48 (m, 1H), 3.79 (s, 3H), 4.47-4.54 (m, 2H), 5.97 (s, 1H), 6.87 (d, *J* = 8.8 Hz, 2H), 7.10 (d, *J* = 8.8 Hz, 2H). <sup>13</sup>C NMR (100 MHz, CDCl<sub>3</sub>):  $\delta$  (ppm) 17.3, 22.8, 26.1, 37.6, 45.5, 46.8, 55.3, 79.7, 114.4, 127.5, 129.0, 159.3, 166.4, 199.3. HRMS (EI): exact

mass calculated for [M]<sup>+</sup> (C<sub>17</sub>H<sub>21</sub>NO<sub>4</sub>) requires  $m/z$  303.1471, found  $m/z$  303.1473. The enantiomeric ratio was determined by Daicel Chiralpak IA (25 cm), *n*-Hexane / EtOH = 9/1, 1.0 mL/min,  $\lambda$  = 254 nm, 25.22 min (major), 40.32 min (minor), ee = 99%.

### 5d: 3-((2*S*,3*R*)-3-(4-fluorophenyl)-4-nitrobutan-2-yl)cyclohex-2-en-1-one

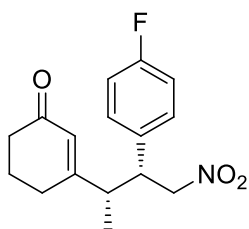

The product was obtained in 83% yield, pale yellow solid. Mp 111-113 °C; [ $\alpha$ ]<sub>D</sub><sup>25</sup> 37.8 (*c* 1.00, CH<sub>2</sub>Cl<sub>2</sub>). <sup>1</sup>H NMR (400 MHz, CDCl<sub>3</sub>):  $\delta$  (ppm) 0.92 (d, *J* = 6.8 Hz, 3H), 2.00-2.12 (m, 2H), 2.37-2.46 (m, 4H), 2.54-2.62 (m, 1H), 3.46-3.52 (m, 1H), 4.48-4.55 (m, 2H), 5.97 (s, 1H), 7.03-7.07 (m, 2H), 7.15-7.19 (m, 2H). <sup>13</sup>C NMR (100 MHz, CDCl<sub>3</sub>):  $\delta$  (ppm) 17.4, 22.8, 26.4, 37.6, 45.4, 46.8, 79.5, 116.0, 116.2, 127.6, 129.5, 129.6, 133.0, 133.0, 165.8, 199.1. HRMS (EI): exact mass

calculated for [M]<sup>+</sup> (C<sub>16</sub>H<sub>18</sub>FNO<sub>3</sub>) requires  $m/z$  291.1271, found  $m/z$  291.1269. The enantiomeric ratio was determined by Daicel Chiralpak IA (25 cm), *n*-Hexane / EtOH = 9/1, 1.0 mL/min,  $\lambda$  = 254 nm, 19.29 min (minor), 26.30 min (major), ee = 99%.

### 5e: 3-((2*S*,3*R*)-3-(4-chlorophenyl)-4-nitrobutan-2-yl)cyclohex-2-en-1-one

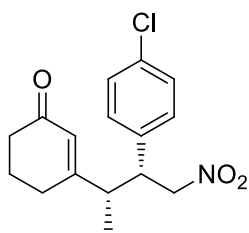

The product was obtained in 73% yield, pale yellow solid. Mp 111-113 °C;  $[\alpha]_{\text{D}}^{25}$  48.7 (*c* 1.00, CH<sub>2</sub>Cl<sub>2</sub>). <sup>1</sup>H NMR (400 MHz, CDCl<sub>3</sub>): δ (ppm) 0.92 (d, *J* = 6.8 Hz, 3H), 1.99-2.14 (m, 2H), 2.33-2.50 (m, 4H), 2.54-2.62 (m, 1H), 3.45-3.51 (m, 1H), 4.48-4.55 (m, 2H), 5.97 (s, 1H), 7.14 (d, *J* = 8.4 Hz, 2H), 7.34 (d, *J* = 8.4 Hz, 2H). <sup>13</sup>C NMR (100 MHz, CDCl<sub>3</sub>): δ (ppm) 17.4, 22.8, 26.0, 37.6, 45.2, 46.9, 79.3, 127.6, 129.3, 129.3, 134.1, 135.8, 165.6, 199.1. HRMS (EI): exact mass calculated for [M]<sup>+</sup> (C<sub>16</sub>H<sub>18</sub>ClNO<sub>3</sub>) requires *m/z* 307.0975, found *m/z* 307.0973. The enantiomeric ratio was determined by Daicel Chiralpak IA (25 cm), *n*-Hexane / EtOH = 9/1, 1.0 mL/min, λ = 254 nm, 20.48 min (major), 28.09 min (minor), ee = 97%.

#### 5f: 3-((2S,3R)-3-(4-bromophenyl)-4-nitrobutan-2-yl)cyclohex-2-en-1-one

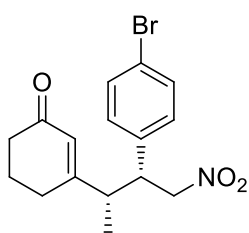

The product was obtained in 66% yield, pale yellow solid. Mp 126-128 °C;  $[\alpha]_{\text{D}}^{25}$  74.3 (*c* 1.00, CH<sub>2</sub>Cl<sub>2</sub>). <sup>1</sup>H NMR (400 MHz, CDCl<sub>3</sub>): δ (ppm) 0.92 (d, *J* = 6.8 Hz, 3H), 1.99-2.14 (m, 2H), 2.32-2.50 (m, 4H), 2.54-2.61 (m, 1H), 3.44-3.50 (m, 1H), 4.48-4.55 (m, 2H), 5.97 (s, 1H), 7.08 (d, *J* = 8.4 Hz, 2H), 7.49 (d, *J* = 8.4 Hz, 2H). <sup>13</sup>C NMR (100 MHz, CDCl<sub>3</sub>): δ (ppm) 17.4, 22.8, 26.0, 37.6, 45.2, 46.9, 79.2, 122.2, 127.6, 129.6, 136.3, 165.6, 199.1. HRMS (EI): exact mass calculated for [M]<sup>+</sup> (C<sub>16</sub>H<sub>18</sub>BrNO<sub>3</sub>) requires *m/z* 351.0470, found *m/z* 351.0471. The enantiomeric ratio was determined by Daicel Chiralpak IA (25 cm), *n*-Hexane / EtOH = 9/1, 1.0 mL/min, λ = 254 nm, 22.00 min (minor), 30.13 min (major), ee = 99%.

#### 5g: 3-((2S,3R)-4-nitro-3-(3-nitrophenyl)butan-2-yl)cyclohex-2-en-1-one

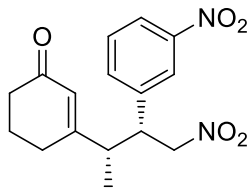

The product was obtained in 55% yield, pale yellow solid. Mp 137-140 °C;  $[\alpha]_{\text{D}}^{25}$  40.0 (*c* 1.00, CH<sub>2</sub>Cl<sub>2</sub>). <sup>1</sup>H NMR (400 MHz, CDCl<sub>3</sub>): δ (ppm) 0.94 (d, *J* = 6.8 Hz, 3H), 2.02-2.16 (m, 2H), 2.36-2.52 (m, 4H), 2.63-2.71 (m, 1H), 3.62-3.69 (m, 1H), 4.55-4.64 (m, 2H), 6.01 (s, 1H), 7.55-7.60 (m, 2H), 8.11 (s, 1H), 8.19-8.22 (m, 2H). <sup>13</sup>C NMR (100 MHz, CDCl<sub>3</sub>): δ (ppm) 17.5, 22.8, 26.1, 37.6, 45.0, 47.1, 78.9, 122.8, 123.4, 127.8, 130.2, 134.3, 139.7, 148.7, 164.7, 198.9. HRMS (EI): exact mass calculated for [M]<sup>+</sup> (C<sub>16</sub>H<sub>18</sub>N<sub>2</sub>O<sub>5</sub>) requires *m/z* 318.1216, found *m/z* 318.1218. The enantiomeric ratio was determined by Daicel Chiralpak IA (25 cm), *n*-Hexane / EtOH = 9/1, 1.0 mL/min, λ = 254 nm, 42.37 min (minor), 47.95 min (major), ee = 98%.

#### 5h: 3-((2S,3R)-3-(naphthalen-2-yl)-4-nitrobutan-2-yl)cyclohex-2-en-1-one

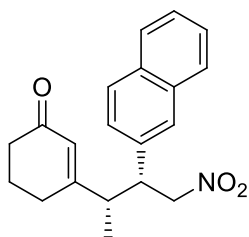

The product was obtained in 82% yield, pale yellow solid. Mp 171-172 °C;  $[\alpha]_{\text{D}}^{25}$  53.2 (*c* 1.00, CH<sub>2</sub>Cl<sub>2</sub>). <sup>1</sup>H NMR (400 MHz, CDCl<sub>3</sub>): δ (ppm) 0.93 (d, *J* = 7.2 Hz, 3H), 2.01-2.15 (m, 2H), 2.39-2.51 (m, 4H), 2.69-2.77 (m, 1H), 3.63-3.70 (m, 1H), 4.56-4.69 (m, 2H), 6.04 (s, 1H), 7.30-7.32 (m, 1H), 7.49-7.51 (m, 2H), 7.65 (s, 1H), 7.80-7.87 (m, 3H). <sup>13</sup>C NMR (100 MHz, CDCl<sub>3</sub>): δ (ppm) 17.6, 22.9, 26.0, 37.6, 45.3, 47.6, 79.5, 124.7, 126.4, 126.6, 127.7, 127.7, 127.8, 129.1, 133.0,



133.4, 134.6, 166.1, 199.2. HRMS (EI): exact mass calculated for  $[M]^+$  ( $C_{20}H_{21}NO_3$ ) requires  $m/z$  323.1521, found  $m/z$  323.1522. The enantiomeric ratio was determined by Daicel Chiralpak IA (25 cm), *n*-Hexane / EtOH = 9/1, 1.0 mL/min,  $\lambda$  = 254 nm, 18.38 min (minor), 29.92 min (major), ee = 98%.

**5i: 3-((2*S*,3*S*)-3-(furan-2-yl)-4-nitrobutan-2-yl)cyclohex-2-en-1-one**

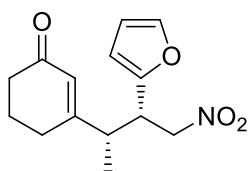

The product was obtained in 61% yield, pale yellow oil.  $[\alpha]_D^{25}$  31.5 (*c* 1.00,  $CH_2Cl_2$ ).  $^1H$  NMR (400 MHz,  $CDCl_3$ ):  $\delta$  (ppm) 1.01 (d,  $J$  = 6.8 Hz, 3H), 1.96-2.11 (m, 2H), 2.25-2.43 (m, 4H), 2.66-2.74 (m, 1H), 3.67-3.73 (m, 1H), 4.46-4.50 (m, 1H), 4.60-4.66 (m, 1H), 5.92 (s, 1H), 6.20 (d,  $J$  = 3.2 Hz, 1H), 6.30-6.32 (m, 1H), 7.38 (d,  $J$  = 1.2 Hz, 1H).  $^{13}C$  NMR (100 MHz,  $CDCl_3$ ):  $\delta$  (ppm) 16.5, 22.8, 26.5, 37.6, 41.1, 43.3, 77.0, 109.2, 110.4, 127.4, 142.7, 150.1, 165.6, 199.3. HRMS (EI): exact mass calculated for  $[M]^+$  ( $C_{14}H_{17}NO_4$ ) requires  $m/z$  263.1158, found  $m/z$  263.1159. The enantiomeric ratio was determined by Daicel Chiralpak IA (25 cm), *n*-Hexane / EtOH = 9/1, 1.0 mL/min,  $\lambda$  = 254 nm, 21.10 min (major), 22.81 min (minor), ee = 97%.

**5j: 3-((2*R*,3*S*)-1-nitro-2-phenylpentan-3-yl)cyclohex-2-en-1-one**

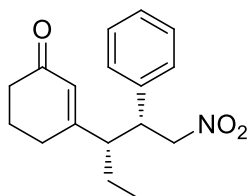

The product was obtained in 78% yield, pale yellow solid. Mp 192-194 °C;  $[\alpha]_D^{25}$  99.1 (*c* 1.00,  $CH_2Cl_2$ ).  $^1H$  NMR (400 MHz,  $CDCl_3$ ):  $\delta$  (ppm) 0.69 (t,  $J$  = 7.2 Hz, 3H), 1.21-1.35 (m, 2H), 2.04-2.10 (m, 2H), 2.34-2.40 (m, 3H), 2.44-2.47 (m, 2H), 3.46-3.52 (m, 1H), 4.44-4.56 (m, 2H), 6.01 (s, 1H), 7.18-7.20 (m, 2H), 7.28-7.37 (m, 3H).  $^{13}C$  NMR (100 MHz,  $CDCl_3$ ):  $\delta$  (ppm) 11.8, 22.8, 23.7, 25.7, 37.8, 47.0, 53.1, 79.7, 127.9, 128.2, 129.1, 129.7, 137.6, 164.2, 198.9. HRMS (ESI): exact mass calculated for  $[M+H]^+$  ( $C_{17}H_{21}NO_3+H$ ) requires  $m/z$  288.1600, found  $m/z$  288.1601. The enantiomeric ratio was determined by Daicel Chiralpak IA (25 cm), *n*-Hexane / EtOH = 9/1, 1.0 mL/min,  $\lambda$  = 254 nm, 12.33 min (minor), 15.92 min (major), ee = 95%.

**5k: 3-((2*R*,3*S*)-1-nitro-2-phenylhexan-3-yl)cyclohex-2-en-1-one**

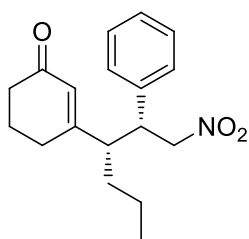

The product was obtained in 78% yield, pale yellow solid. Mp 128-130 °C;  $[\alpha]_D^{25}$  53.9 (*c* 1.00,  $CH_2Cl_2$ ).  $^1H$  NMR (400 MHz,  $CDCl_3$ ): 0.66 (t,  $J$  = 8 Hz, 3H), 0.89-0.96 (m, 1H), 1.00-1.13 (m, 2H), 1.23-1.30 (m, 1H), 1.95-2.02 (m, 2H), 2.27-2.28 (m, 2H), 2.36-2.45 (m, 3H), 3.37-3.44 (m, 1H), 4.36-4.48 (m, 2H), 5.93 (s, 1H), 7.10-7.12 (m, 2H), 7.21-7.30 (m, 3H).  $^{13}C$  NMR (100 MHz,  $CDCl_3$ ):  $\delta$  (ppm) 12.7, 19.4, 21.7, 24.7, 31.7, 36.7, 46.1, 50.1, 78.8, 126.9, 127.1, 128.1, 128.4, 136.6, 163.5, 197.9. HRMS (EI): exact mass calculated for  $[M]^+$  ( $C_{18}H_{23}NO_3$ ) requires  $m/z$  301.1678, found  $m/z$  301.1679. The enantiomeric ratio was determined by Daicel Chiralpak AS (25 cm), *n*-Hexane / EtOH = 7/3, 0.55 mL/min,  $\lambda$  = 220 nm, 14.87 min (minor), 23.16 min (major), ee = 99%.

**5l: 3-((2*R*,3*S*)-1-nitro-2-phenylheptan-3-yl)cyclohex-2-en-1-one**

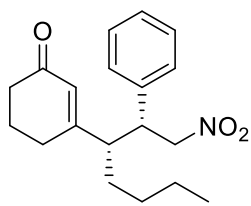

The product was obtained in 57% yield, white solid. Mp 108-110 °C;  $[\alpha]_D^{25}$  99.7 (*c* 1.00, CH<sub>2</sub>Cl<sub>2</sub>). <sup>1</sup>H NMR (400 MHz, CDCl<sub>3</sub>):  $\delta$  (ppm) 0.74 (t, *J* = 7.2 Hz, 3H), 0.95-1.20 (m, 5H), 1.30-1.34 (m, 1H), 2.04-2.10 (m, 2H), 2.35-2.36 (m, 2H), 2.43-2.50 (m, 3H), 3.44-3.51 (m, 1H), 4.43-4.54 (m, 2H), 6.00 (s, 1H), 7.17-7.19 (m, 2H), 7.28-7.37 (m, 3H). <sup>13</sup>C NMR (100 MHz, CDCl<sub>3</sub>):  $\delta$  (ppm) 12.7, 19.4, 21.7, 24.7, 31.7, 36.7, 46.1, 50.1, 78.8, 126.9, 127.1, 128.1, 136.6, 163.5, 197.9. HRMS (EI): exact mass calculated for [M]<sup>+</sup> (C<sub>19</sub>H<sub>25</sub>NO<sub>3</sub>) requires *m/z* 315.1834, found *m/z* 315.1833. The enantiomeric ratio was determined by Daicel Chiralpak IA (25 cm), *n*-Hexane / EtOH = 19/1, 1.0 mL/min,  $\lambda$  = 254 nm, 9.94 min (major), 12.59 min (minor), ee = 99%.

### 5m: 3-((2R,3S)-1-nitro-2-phenyloctan-3-yl)cyclohex-2-en-1-one

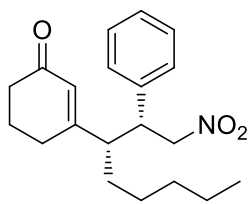

The product was obtained in 58% yield, white solid. Mp 95-97 °C;  $[\alpha]_D^{25}$  67.3 (*c* 1.00, CH<sub>2</sub>Cl<sub>2</sub>). <sup>1</sup>H NMR (400 MHz, CDCl<sub>3</sub>):  $\delta$  (ppm) 0.78 (t, *J* = 7.2 Hz, 3H), 1.18-0.95 (m, 7H), 1.33-1.28 (m, 1H), 2.10-2.03 (m, 2H), 2.37-2.34 (m, 2H), 2.50-2.44 (m, 3H), 3.47 (td, *J*<sub>1</sub> = 4.8 Hz, *J*<sub>2</sub> = 10.8 Hz, 1H), 4.55-4.43 (m, 2H), 6.00 (m, 1H), 7.19-7.17 (m, 2H), 7.38-7.28 (m, 3H). <sup>13</sup>C NMR (100 MHz, CDCl<sub>3</sub>):  $\delta$  (ppm) 13.9, 22.4, 22.8, 25.7, 26.9, 29.7, 30.5, 31.4, 37.8, 47.1, 51.3, 79.8, 127.9, 128.2, 129.1, 129.5, 137.6, 164.6, 199.0. HRMS (EI): exact mass calculated for [M]<sup>+</sup> (C<sub>20</sub>H<sub>27</sub>NO<sub>3</sub>) requires *m/z* 329.1991, found *m/z* 329.1994. The enantiomeric ratio was determined by Daicel Chiralpak AD (25 cm), *n*-Hexane / EtOH = 19/1, 0.8 mL/min,  $\lambda$  = 254 nm, 20.21 min (major), 22.48 min (minor), ee = 98%.

### 5n: 3-((1S,2R)-3-nitro-1,2-diphenylpropyl)cyclohex-2-en-1-one

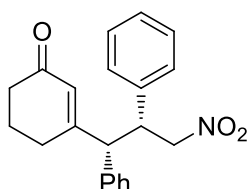

The product was obtained in 34% yield, yellow oil.  $[\alpha]_D^{25}$  8.5 (*c* 1.00, CH<sub>2</sub>Cl<sub>2</sub>). <sup>1</sup>H NMR (400 MHz, CDCl<sub>3</sub>):  $\delta$  (ppm) 7.17-7.03 (m, 10H), 6.33 (s, 1H), 4.75-4.61 (m, 2H), 4.20-4.14 (m, 1H), 3.79-3.76 (m, 1H), 2.44-2.24 (m, 4H), 2.03-1.87 (m, 2H). <sup>13</sup>C NMR (100 MHz, CDCl<sub>3</sub>):  $\delta$  (ppm) 22.4, 27.8, 37.1, 46.0, 56.6, 79.8, 127.6, 127.9, 128.0, 128.4, 129.1, 129.6, 137.2, 137.9, 163.4, 199.2. HRMS (EI): exact mass calculated for [M]<sup>+</sup> (C<sub>21</sub>H<sub>21</sub>NO<sub>3</sub>) requires *m/z* 335.1521, found *m/z* 335.1522. The enantiomeric ratio was determined by Daicel Chiralpak IA (25 cm), *n*-Hexane / IPA = 9/1, 1.0 mL/min,  $\lambda$  = 254 nm, 11.49 min (major), 14.64 min (minor), ee = 92%.

### 5o: 3-((2S,3R)-4-nitro-1,3-diphenylbutan-2-yl)cyclohex-2-en-1-one

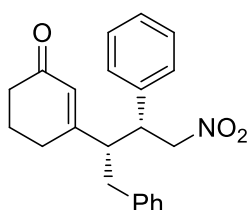

The product was obtained in 56% yield, pale yellow solid. Mp 108-110 °C;  $[\alpha]_D^{25}$  57.0 (*c* 1.00, CH<sub>2</sub>Cl<sub>2</sub>). <sup>1</sup>H NMR (400 MHz, CDCl<sub>3</sub>):  $\delta$  (ppm) 1.84-1.95 (m, 2H), 2.05-2.15 (m, 1H), 2.27-2.39 (m, 3H), 2.45 (dd, *J* = 13.8, 11.5 Hz, 1H), 2.63 (dd, *J* = 13.8, 3.7 Hz, 1H), 2.79 (td, *J* = 11.5, 3.7 Hz, 1H), 3.62 (td, *J* = 10.6, 4.9 Hz, 1H), 4.54 (qd, *J* = 12.5, 7.5 Hz, 2H), 5.83 (s, 1H), 6.85-6.94 (m, 2H), 7.10-7.21 (m, 3H), 7.28-7.37 (m, 3H), 7.41 (t, *J* = 7.3 Hz, 2H). <sup>13</sup>C NMR (100 MHz, CDCl<sub>3</sub>):  $\delta$  (ppm) 22.4, 27.4,

37.5, 38.0, 47.3, 53.3, 79.5, 126.6, 128.0, 128.1, 128.5, 128.5, 128.7, 128.9, 129.4, 129.4, 137.4, 138.3, 163.7, 198.7. HRMS (EI): exact mass calculated for  $[M]^+$  ( $C_{22}H_{23}NO_3$ ) requires  $m/z$  349.1678, found  $m/z$  349.1680. The enantiomeric ratio was determined by Daicel Chiralpak IB (25 cm), *n*-Hexane / EtOH = 19/1, 1.0 mL/min,  $\lambda$  = 220 nm, 19.65 min (minor), 20.64 min (major), ee = 98%.

**5p: 3-((2*R*,3*S*)-2-(4-bromophenyl)-1-nitrohexan-3-yl)cyclohex-2-en-1-one**

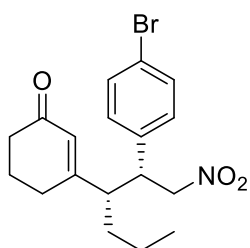

The product was obtained in 46% yield, pale yellow solid. Mp 56-59 °C;  $[\alpha]_D^{25}$  24.9 (*c* 1.00,  $CH_2Cl_2$ ).  $^1H$  NMR (400 MHz,  $CDCl_3$ ):  $\delta$  (ppm) 0.75 (t,  $J$  = 7.2 Hz, 3H), 0.94-1.20 (m, 3H), 1.22-1.34 (m, 1H), 2.02-2.11 (m, 2H), 2.32-2.37 (m, 2H), 2.40-2.48 (m, 3H), 3.39-3.51 (m, 1H), 4.41-4.52 (m, 2H), 5.99 (s, 1H), 7.08 (d,  $J$  = 8.4 Hz, 2H), 7.49 (d,  $J$  = 8.0 Hz, 2H).  $^{13}C$  NMR (100 MHz,  $CDCl_3$ ):  $\delta$  (ppm)

13.7, 20.4, 22.7, 25.6, 32.7, 37.7, 46.6, 50.9, 79.5, 122.1, 129.6, 129.6, 132.3, 136.7, 164.0, 198.9. HRMS (EI): exact mass calculated for  $[M]^+$  ( $C_{18}H_{22}BrNO_3$ ) requires  $m/z$  379.0783, found  $m/z$  379.0784. The enantiomeric ratio was determined by Daicel Chiralpak IA (25 cm), *n*-Hexane / EtOH = 19/1, 1.0 mL/min,  $\lambda$  = 220 nm, 14.60 min (minor), 18.44 min (major), ee = 99%.

**6a: (R)-3-ethyl-4-((R)-2-nitro-1-phenylethyl)cyclohex-2-en-1-one**

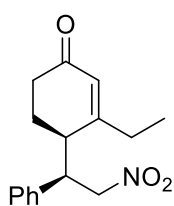

The product was obtained in 68% yield, pale yellow oil.  $[\alpha]_D^{25}$  -138 (*c* 1.0,  $CH_2Cl_2$ ).  $^1H$  NMR (400 MHz,  $CDCl_3$ ):  $\delta$  (ppm) 1.01 (t,  $J$  = 7.2 Hz, 3H), 1.84-1.97 (m, 3H), 1.99-2.08 (m, 1H), 2.31-2.38 (m, 1H), 2.45- 2.53 (m, 1H), 2.67-2.71 (m, 1H), 3.94-3.99 (m, 1H), 4.59-4.63 (m, 1H), 4.88-4.94 (m, 1H), 5.96 (s, 1H), 7.22 (d,  $J$  = 7.2 Hz, 2H), 7.29-7.32 (m, 1H), 7.35-7.38 (m, 2H).  $^{13}C$  NMR (100 MHz,  $CDCl_3$ ):  $\delta$  (ppm)

11.6, 24.6, 29.3, 34.3, 43.1, 45.3, 76.6, 126.8, 127.8, 128.2, 129.1, 137.5, 167.4, 198.3. HRMS (EI): exact mass calculated for  $[M]^+$  ( $C_{16}H_{19}NO_3$ ) requires  $m/z$  273.1365, found  $m/z$  273.1366. The enantiomeric ratio was determined by Daicel Chiralpak IA (25 cm), *n*-Hexane / EtOH = 4/1, 1.0 mL/min,  $\lambda$  = 220 nm, 10.76 min (major), 13.02 min (minor), ee = 99%.

**6b: (R)-3-ethyl-4-((R)-2-nitro-1-(*p*-tolyl)ethyl)cyclohex-2-en-1-one**

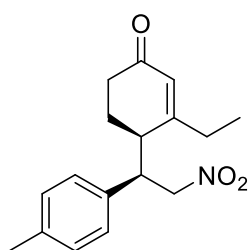

The product was obtained in 70% yield, colorless oil.  $[\alpha]_D^{25}$  -141 (*c* 1.0,  $CH_2Cl_2$ ).  $^1H$  NMR (400 MHz,  $CDCl_3$ ):  $\delta$  (ppm) 1.02 (t,  $J$  = 7.2 Hz, 3H), 1.82-1.90 (m, 1H), 1.93-2.07 (m, 3H), 2.29-2.38 (m, 4H), 2.44-2.51 (m, 1H), 2.64-2.69 (m, 1H), 3.90-3.96 (m, 1H), 4.56-4.60 (m, 1H), 4.85-4.91 (m, 1H), 5.95 (s, 1H), 7.10 (d,  $J$  = 8.4 Hz, 2H), 7.16 (d,  $J$  = 8.0 Hz, 2H).  $^{13}C$  NMR (100 MHz,  $CDCl_3$ ):  $\delta$  (ppm)

10.6, 20.0, 23.6, 28.3, 33.3, 42.0, 44.0, 125.7, 126.6, 128.7, 133.3, 136.9, 166.5, 197.4. HRMS (EI): exact mass calculated for  $[M]^+$  ( $C_{17}H_{21}NO_3$ ) requires  $m/z$  287.1521, found  $m/z$  287.1519. The enantiomeric ratio was determined by Daicel Chiralpak IB, *n*-Hexane / EtOH = 9/1, 1.0 mL/min,  $\lambda$  = 220 nm, 14.94 min (minor), 22.26 min (major), ee = 98%.

**6c: (R)-3-ethyl-4-((R)-1-(4-methoxyphenyl)-2-nitroethyl)cyclohex-2-en-1-one**

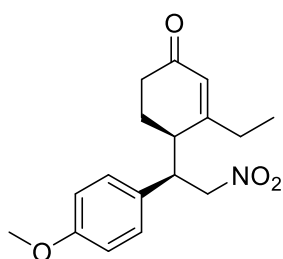

The product was obtained in 66% yield, colorless oil.  $[\alpha]_{\text{D}}^{25}$  -165 ( $c$  1.0,  $\text{CH}_2\text{Cl}_2$ ).  $^1\text{H}$  NMR (400 MHz,  $\text{CDCl}_3$ ):  $\delta$  (ppm) 1.01 (t,  $J = 7.2$  Hz, 3H), 1.84-1.96 (m, 3H), 2.00-2.09 (m, 1H), 2.31-2.38 (m, 1H), 2.45-2.53 (m, 1H), 2.62-2.66 (m, 1H), 3.34 (s, 3H), 3.86-3.92 (m, 1H), 4.58-4.62 (m, 1H), 4.81-4.87 (m, 1H), 5.94 (s, 1H), 6.88 (d,  $J = 8.8$  Hz, 2H), 7.13 (d,  $J = 8.8$  Hz, 2H).  $^{13}\text{C}$  NMR (100 MHz,  $\text{CDCl}_3$ ):  $\delta$  (ppm) 10.6, 23.7, 28.4, 33.1, 42.0, 43.8, 54.3, 113.4, 125.7, 127.8, 128.2, 158.3, 166.7, 197.3. HRMS (EI): exact mass calculated for  $[\text{M}]^+$  ( $\text{C}_{17}\text{H}_{21}\text{NO}_4$ ) requires  $m/z$  303.1471, found  $m/z$  303.1473. The enantiomeric ratio was determined by Daicel Chiralpak IB,  $n$ -Hexane / EtOH = 9/1, 1.0 mL/min,  $\lambda = 220$  nm, 16.98 min (minor), 25.70 (major), ee = 95%.

**6d: (R)-3-ethyl-4-((R)-1-(4-fluorophenyl)-2-nitroethyl)cyclohex-2-en-1-one**

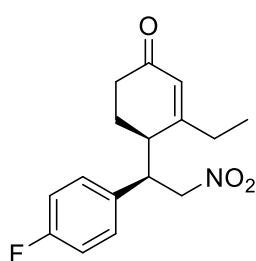

The product was obtained in 74% yield, pale yellow oil.  $[\alpha]_{\text{D}}^{25}$  -167 ( $c$  1.0,  $\text{CH}_2\text{Cl}_2$ ).  $^1\text{H}$  NMR (400 MHz,  $\text{CDCl}_3$ ):  $\delta$  (ppm) 0.94 (t,  $J = 7.2$  Hz, 3H), 1.78-1.88 (m, 3H), 1.93-2.02 (m, 1H), 2.25-2.32 (m, 1H), 2.38-2.47 (m, 1H), 2.55-2.60 (m, 1H), 3.84-3.90 (m, 1H), 4.53-4.57 (m, 1H), 4.75-4.81 (m, 1H), 5.88 (s, 1H), 6.97-7.01 (m, 2H), 7.12-7.15 (m, 2H).  $^{13}\text{C}$  NMR (100 MHz,  $\text{CDCl}_3$ ):  $\delta$  (ppm) 10.6, 23.6, 28.4, 33.1, 42.0, 43.8, 115.0, 115.2, 125.9, 128.3, 128.4, 166.1, 197.1. HRMS (EI): exact mass calculated for  $[\text{M}]^+$  ( $\text{C}_{16}\text{H}_{18}\text{FNO}_3$ ) requires  $m/z$  291.1271, found  $m/z$  291.1273. The enantiomeric ratio was determined by Daicel Chiralpak IA,  $n$ -Hexane / EtOH = 9/1, 1.0 mL/min,  $\lambda = 220$  nm, 18.95 min (major), 21.35 (minor), ee = 99%.

**6e: (R)-4-((R)-1-(4-chlorophenyl)-2-nitroethyl)-3-ethylcyclohex-2-en-1-one**

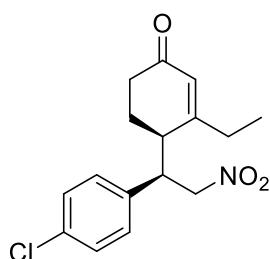

The product was obtained in 76% yield, pale yellow oil.  $[\alpha]_{\text{D}}^{25}$  -148 ( $c$  1.0,  $\text{CH}_2\text{Cl}_2$ ).  $^1\text{H}$  NMR (400 MHz,  $\text{CDCl}_3$ ):  $\delta$  (ppm) 1.03 (t,  $J = 7.6$  Hz, 3H), 1.82-2.08 (m, 4H), 2.31-2.39 (m, 1H), 2.44-2.52 (m, 1H), 2.63-2.68 (m, 1H), 3.91-3.97 (m, 1H), 4.58-4.62 (m, 1H), 4.82-4.88 (m, 1H), 5.96 (s, 1H), 7.17 (d,  $J = 8.4$  Hz, 2H), 7.35 (d,  $J = 8.4$  Hz, 2H).  $^{13}\text{C}$  NMR (100 MHz,  $\text{CDCl}_3$ ):  $\delta$  (ppm) 11.6, 24.6, 29.4, 34.2, 42.9, 44.9, 76.4, 127.0, 129.1, 129.4, 134.2, 136.0, 166.8, 198.1. HRMS (EI): exact mass calculated for  $[\text{M}]^+$  ( $\text{C}_{16}\text{H}_{18}\text{ClNO}_3$ ) requires  $m/z$  307.0975, found  $m/z$  307.0973. The enantiomeric ratio was determined by Daicel Chiralpak IB,  $n$ -Hexane / EtOH = 9/1, 1.0 mL/min,  $\lambda = 220$  nm, 15.75 min (minor), 27.64 (major), ee = 99%.

**6f: (R)-4-((R)-1-(4-bromophenyl)-2-nitroethyl)-3-ethylcyclohex-2-en-1-one**

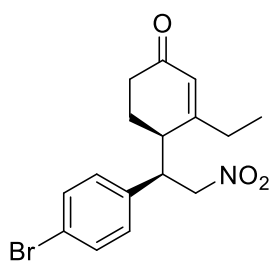

The product was obtained in 80% yield, pale yellow oil.  $[\alpha]_{\text{D}}^{25}$  -98 ( $c$  1.0,  $\text{CH}_2\text{Cl}_2$ ).  $^1\text{H}$  NMR (400 MHz,  $\text{CDCl}_3$ ):  $\delta$  (ppm) 1.03 (t,  $J = 7.2$  Hz, 3H), 1.82-1.89 (m, 1H), 1.93-2.07 (m, 3H), 2.31-2.38 (m, 1H), 2.44-2.52 (m, 1H), 2.63-2.68 (m, 1H), 3.90-3.96 (m, 1H), 4.58-4.62 (m, 1H), 4.82-4.88 (m, 1H), 5.96 (s, 1H), 7.12 (d,  $J = 8.4$  Hz, 2H), 7.50 (d,  $J = 8.4$  Hz, 2H).  $^{13}\text{C}$  NMR (100 MHz,  $\text{CDCl}_3$ ):  $\delta$  (ppm) 11.7, 24.5, 29.4, 34.2, 42.9, 44.9, 76.3, 122.2, 127.0, 129.4, 132.3, 136.6, 166.7, 198.0. HRMS (EI): exact mass calculated for  $[\text{M}]^+$  ( $\text{C}_{16}\text{H}_{18}\text{BrNO}_3$ ) requires  $m/z$

351.0470, found  $m/z$  351.0470. The enantiomeric ratio was determined by Daicel Chiralpak IB (25 cm), *n*-Hexane / EtOH = 9/1, 1.0 mL/min,  $\lambda = 220$  nm, 19.71 min (minor), 36.38 (major), ee = 98%.

**6g: (R)-3-ethyl-4-((R)-2-nitro-1-(3-nitrophenyl)ethyl)cyclohex-2-en-1-one**

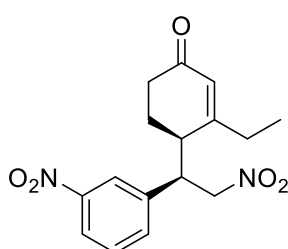

The product was obtained in 79% yield, pale yellow oil.  $[\alpha]_D^{25} -102$  (*c* 1.0, CH<sub>2</sub>Cl<sub>2</sub>). <sup>1</sup>H NMR (400 MHz, CDCl<sub>3</sub>):  $\delta$  (ppm) 1.06 (t, *J* = 7.2 Hz, 3H), 1.85-1.94 (m, 1H), 1.97-2.07 (m, 3H), 2.34-2.41 (m, 1H), 2.46-2.55 (m, 1H), 2.73-2.77 (m, 1H), 4.10-4.16 (m, 1H), 4.65-4.69 (m, 1H), 4.95-5.01 (m, 1H), 6.01 (s, 1H), 7.57-7.60 (m, 2H), 8.18 (s, 1H), 8.21-8.22 (m, 1H). <sup>13</sup>C NMR (100 MHz, CDCl<sub>3</sub>):  $\delta$  (ppm) 10.6, 23.3, 28.2, 33.3, 41.9, 44.0, 74.8, 121.6, 122.3, 126.5, 129.2, 133.0, 138.9, 147.6, 164.6, 196.8. HRMS (EI): exact mass calculated for [M]<sup>+</sup> (C<sub>16</sub>H<sub>18</sub>N<sub>2</sub>O<sub>5</sub>) requires  $m/z$  318.1216, found  $m/z$  318.1219. The enantiomeric ratio was determined by Daicel Chiralpak IB, *n*-Hexane / EtOH = 7/3, 0.8 mL/min,  $\lambda = 220$  nm, 13.57 min (minor), 20.74 (major), ee = 94%.

**6h: (R)-3-ethyl-4-((R)-1-(naphthalen-2-yl)-2-nitroethyl)cyclohex-2-en-1-one**

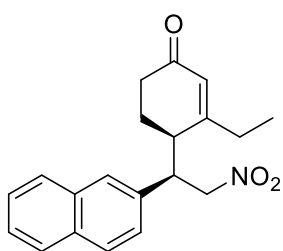

The product was obtained in 80% yield, colorless oil.  $[\alpha]_D^{25} -144$  (*c* 1.0, CH<sub>2</sub>Cl<sub>2</sub>). <sup>1</sup>H NMR (400 MHz, CDCl<sub>3</sub>):  $\delta$  (ppm) 0.99 (t, *J* = 7.2 Hz, 3H), 1.87-2.06 (m, 4H), 2.30-2.37 (m, 1H), 4.65-4.68 (m, 1H), 4.99-5.06 (m, 1H), 5.98 (s, 1H), 7.35 (d, *J* = 8.4 Hz, 1H), 7.49-7.51 (m, 2H), 7.67 (s, 1H), 7.80-7.86 (m, 3H). <sup>13</sup>C NMR (100 MHz, CDCl<sub>3</sub>):  $\delta$  (ppm) 10.6, 23.5, 28.3, 33.3, 41.9, 44.3, 75.4, 124.2, 125.5, 125.7, 125.8, 125.9, 126.7, 126.8, 128.0, 131.8, 132.2, 133.8, 166.3, 197.4. HRMS (EI): exact mass calculated for [M]<sup>+</sup> (C<sub>20</sub>H<sub>21</sub>NO<sub>3</sub>) requires  $m/z$  323.1521, found  $m/z$  323.1526. The enantiomeric ratio was determined by Daicel Chiralpak IB, *n*-Hexane / EtOH = 7/3, 0.8 mL/min,  $\lambda = 220$  nm, 13.36 (minor), 24.64 min (major), ee = 99%.

**6i: (R)-3-ethyl-4-((S)-1-(furan-2-yl)-2-nitroethyl)cyclohex-2-en-1-one**

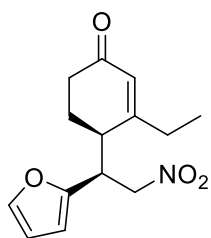

The product was obtained in 82% yield, pale yellow oil.  $[\alpha]_D^{25} -142$  (*c* 1.0, CH<sub>2</sub>Cl<sub>2</sub>). <sup>1</sup>H NMR (400 MHz, CDCl<sub>3</sub>):  $\delta$  (ppm) 1.01 (t, *J* = 7.2 Hz, 3H), 1.78-1.83 (m, 1H), 2.02-2.13 (m, 3H), 2.33-2.40 (m, 1H), 2.91-2.93 (m, 1H), 4.09-4.13 (m, 1H), 4.49-4.52 (m, 1H), 4.80-4.86 (m, 1H), 5.99 (s, 1H), 6.20 (s, 1H), 6.34 (s, 1H), 7.40 (s, 1H). <sup>13</sup>C NMR (100 MHz, CDCl<sub>3</sub>):  $\delta$  (ppm) 11.6, 24.7, 28.5, 34.6, 39.1, 40.7, 75.4, 108.1, 110.7, 127.2, 142.5, 151.0, 166.2, 198.3. HRMS (EI): exact mass calculated for [M]<sup>+</sup> (C<sub>14</sub>H<sub>17</sub>NO<sub>4</sub>) requires  $m/z$  263.1158, found  $m/z$  263.1160. The enantiomeric ratio was determined by Daicel Chiralpak IB, *n*-Hexane / EtOH = 7/3, 0.8 mL/min,  $\lambda = 220$  nm, 8.66 min (minor), 13.91 min (major), ee = 96%.

**6j: (R)-4-((R)-2-nitro-1-phenylethyl)-3-propylcyclohex-2-en-1-one**

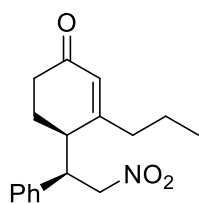

The product was obtained in 83% yield, pale yellow solid.  $[\alpha]_D^{25}$  -141 (*c* 1.0, CH<sub>2</sub>Cl<sub>2</sub>). <sup>1</sup>H NMR (400 MHz, CDCl<sub>3</sub>):  $\delta$  (ppm) 0.77 (t, *J* = 6.4 Hz, 3H), 1.25-1.34 (m, 1H), 1.40-1.52 (m, 1H), 1.70-1.86 (m, 3H), 1.91-1.99 (m, 1H), 2.23-2.30 (m, 1H), 2.37-2.46 (m, 1H), 2.58-2.63 (m, 1H), 3.85-3.91 (m, 1H), 4.53-4.57 (m, 1H), 4.81-4.87 (m, 1H), 5.87 (s, 1H), 7.15-7.16 (m, 2H), 7.21-7.25 (m, 1H), 7.27-7.31 (m, 2H). <sup>13</sup>C NMR (100 MHz, CDCl<sub>3</sub>):  $\delta$  (ppm) 12.7, 19.5, 23.5, 33.2, 37.3, 41.7, 44.4, 75.6, 126.8, 126.8, 127.1, 128.1, 136.5, 165.0, 197.3. HRMS (EI): exact mass calculated for [M]<sup>+</sup> (C<sub>17</sub>H<sub>21</sub>NO<sub>3</sub>) requires *m/z* 287.1521, found *m/z* 287.1523. The enantiomeric ratio was determined by Daicel Chiralpak IB, *n*-Hexane / EtOH = 4/1, 0.9 mL/min,  $\lambda$  = 220 nm, 11.44 min (minor), 16.49 min (major), ee = 99%.

**6k: (R)-3-butyl-4-((R)-2-nitro-1-phenylethyl)cyclohex-2-en-1-one**

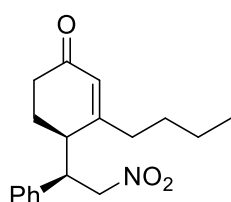

The product was obtained in 74% yield, pale yellow oil.  $[\alpha]_D^{25}$  -145 (*c* 1.0, CH<sub>2</sub>Cl<sub>2</sub>). <sup>1</sup>H NMR (400 MHz, CDCl<sub>3</sub>):  $\delta$  (ppm) 0.79 (t, *J* = 7.2 Hz, 3H), 1.13-1.23 (m, 3H), 1.34-1.44 (m, 1H), 1.75-1.84 (m, 3H), 1.91-2.00 (m, 1H), 2.23-2.30 (m, 1H), 2.38-2.46 (m, 1H), 2.59-2.63 (m, 1H), 3.85-3.90 (m, 1H), 4.53-4.57 (m, 1H), 4.80-4.86 (m, 1H), 5.87 (s, 1H), 7.14-7.16 (m, 2H), 7.22-7.25 (m, 1H), 7.27-7.31 (m, 1H). <sup>13</sup>C NMR (100 MHz, CDCl<sub>3</sub>):  $\delta$  (ppm) 13.8, 22.3, 24.6, 29.4, 34.2, 36.1, 42.7, 45.4, 76.7, 127.7, 127.8, 128.2, 129.1, 137.5, 166.4, 198.3. HRMS (EI): exact mass calculated for [M]<sup>+</sup> (C<sub>18</sub>H<sub>23</sub>NO<sub>3</sub>) requires *m/z* 301.1678, found *m/z* 301.1680. The enantiomeric ratio was determined by Daicel Chiralpak IB, *n*-Hexane / EtOH = 4/1, 0.9 mL/min,  $\lambda$  = 220 nm, 10.81 min (minor), 16.71 min (major), ee = 98%.

**6l: (R)-4-((R)-2-nitro-1-phenylethyl)-3-pentylcyclohex-2-en-1-one**

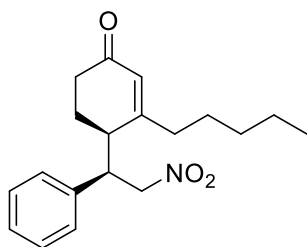

The product was obtained in 75% yield, pale yellow oil.  $[\alpha]_D^{25}$  -150 (*c* 1.0, CH<sub>2</sub>Cl<sub>2</sub>). <sup>1</sup>H NMR (400 MHz, CDCl<sub>3</sub>):  $\delta$  (ppm) 0.86 (t, *J* = 7.2 Hz, 3H), 1.16-1.37 (m, 5H), 1.41-1.51 (m, 1H), 1.85-1.92 (m, 3H), 1.98-2.07 (m, 1H), 2.30-2.38 (m, 1H), 2.45-2.53 (m, 1H), 2.66-2.71 (m, 1H), 3.92-3.98 (m, 1H), 4.60-4.64 (m, 1H), 4.87-4.93 (m, 1H), 5.94 (s, 1H), 7.23 (d, *J* = 7.2 Hz, 2H), 7.29-7.32 (m, 1H), 7.34-7.38 (m, 2H). <sup>13</sup>C NMR (100 MHz, CDCl<sub>3</sub>):  $\delta$  (ppm) 12.7, 21.3, 23.6, 28.4, 33.2, 35.1, 41.7, 44.4, 75.7, 126.7, 126.8, 127.2, 128.1, 136.5, 165.4, 197.3. HRMS (EI): exact mass calculated for [M]<sup>+</sup> (C<sub>19</sub>H<sub>25</sub>NO<sub>3</sub>) requires *m/z* 315.1834, found *m/z* 315.1839. The enantiomeric ratio was determined by Daicel Chiralpak IB, *n*-Hexane / EtOH = 4/1, 0.9 mL/min,  $\lambda$  = 220 nm, 10.68 min (minor), 16.66 min (major), ee = 98%.

**6m: (R)-3-hexyl-4-((R)-2-nitro-1-phenylethyl)cyclohex-2-en-1-one**

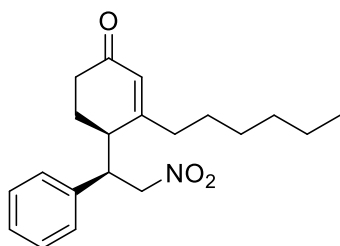

The product was obtained in 75% yield, pale yellow oil.  $[\alpha]_D^{25}$  -148 (*c* 1.0, CH<sub>2</sub>Cl<sub>2</sub>). <sup>1</sup>H NMR (400 MHz, CDCl<sub>3</sub>):  $\delta$  (ppm) 0.87 (t, *J* = 7.2 Hz, 3H), 1.21-1.35 (m, 7H), 1.42-1.47 (m, 1H), 1.80-1.91 (m, 3H), 1.98-2.07 (m, 1H), 2.30-2.38 (m, 1H), 2.45-2.53 (m, 1H), 2.66-2.70 (m, 1H), 3.92-3.97 (m, 1H), 4.60-4.64 (m, 1H), 4.87-4.93 (m, 1H), 5.94 (s, 1H), 7.22 (d, *J* = 7.2 Hz, 2H), 7.29-7.32 (m, 1H), 7.34-7.38 (m, 2H). <sup>13</sup>C NMR (100 MHz, CDCl<sub>3</sub>):  $\delta$  (ppm) 14.0, 22.5, 24.6, 27.3, 28.8, 31.4, 34.2, 36.4, 42.7, 45.4, 76.7, 127.7, 127.8, 128.2,

129.1, 137.5, 166.5, 198.4. HRMS (EI): exact mass calculated for  $[M]^+$  ( $C_{20}H_{27}NO_3$ ) requires  $m/z$  329.1991, found  $m/z$  329.1990. The enantiomeric ratio was determined by Daicel Chiralpak IB, *n*-Hexane / EtOH = 4/1, 0.9 mL/min,  $\lambda$  = 220 nm, 10.63 min (minor), 18.92 min (major), ee = 99%.

**6n: (R)-3-benzyl-4-((R)-2-nitro-1-phenylethyl)cyclohex-2-en-1-one**

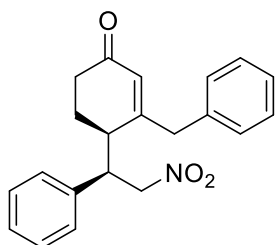

The product was obtained in 79% yield, pale yellow oil.  $[\alpha]_D^{25}$  -142 (*c* 1.0,  $CH_2Cl_2$ ).  $^1H$  NMR (400 MHz,  $CDCl_3$ ):  $\delta$  (ppm) 1.83-1.99 (m, 2H), 2.33-2.41 (m, 1H), 2.50-2.58 (m, 2H), 2.90 (d,  $J$  = 15.6 Hz, 1H), 3.20 (d,  $J$  = 15.6 Hz, 1H), 3.94-4.00 (m, 1H), 4.65-4.69 (m, 1H), 4.84-4.90 (m, 1H), 5.91 (s, 1H), 7.00 (d,  $J$  = 7.2 Hz, 2H), 7.12 (d,  $J$  = 7.2 Hz, 2H), 7.27-7.40 (m, 6H).  $^{13}C$  NMR (100 MHz,  $CDCl_3$ ):  $\delta$  (ppm) 24.9, 33.9, 41.7, 43.2, 45.2, 77.0, 127.2, 127.9, 128.3, 128.9, 129.1, 129.2, 129.4, 136.4, 137.6, 165.0, 198.3. HRMS (EI): exact mass calculated for  $[M]^+$  ( $C_{21}H_{21}NO_3$ ) requires  $m/z$  335.1521, found  $m/z$  335.1525. The enantiomeric ratio was determined by Daicel Chiralpak IB, *n*-Hexane / EtOH = 4/1, 0.9 mL/min,  $\lambda$  = 220 nm, 15.07 min (minor), 25.50 min (major), ee = 98%.

**6o: (R)-4-((R)-2-nitro-1-phenylethyl)-3-phenethylcyclohex-2-en-1-one**

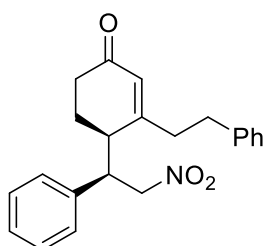

The product was obtained in 77% yield, pale yellow oil.  $[\alpha]_D^{25}$  -146 (*c* 1.0,  $CH_2Cl_2$ ).  $^1H$  NMR (400 MHz,  $CDCl_3$ ):  $\delta$  (ppm) 1.82-1.89 (m, 1H), 1.94-2.02 (m, 1H), 2.09-2.12 (m, 2H), 2.30-2.38 (m, 1H), 2.46-2.54 (m, 2H), 2.55-2.65 (m, 1H), 3.88-3.93 (m, 1H), 4.60-4.64 (m, 1H), 4.83-4.89 (m, 1H), 5.96 (s, 1H), 7.03 (d,  $J$  = 7.2 Hz, 2H), 7.18-7.21 (m, 3H), 7.25-7.28 (m, 2H), 7.32-7.38 (m, 3H).  $^{13}C$  NMR (100 MHz,  $CDCl_3$ ):  $\delta$  (ppm) 23.7, 32.8, 32.8, 37.1, 41.9, 44.5, 75.9, 125.4, 126.8, 127.0, 127.2, 127.2, 127.6, 128.1, 136.4, 139.1, 164.6, 197.2. HRMS (EI): exact mass calculated for  $[M]^+$  ( $C_{22}H_{23}NO_3$ ) requires  $m/z$  349.1678, found  $m/z$  349.1681. The enantiomeric ratio was determined by Daicel Chiralpak IB, *n*-Hexane / EtOH = 4/1, 0.8 mL/min,  $\lambda$  = 220 nm, 16.36 min (minor), 29.11 min (major), ee = 99%.

**6p: (R)-4-((R)-1-(4-bromophenyl)-2-nitroethyl)-3-pentylcyclohex-2-en-1-one**

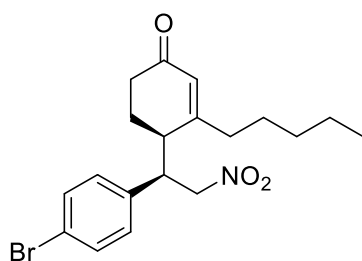

The product was obtained in 79% yield, pale yellow solid, Mp 96-99 °C.  $[\alpha]_D^{25}$  -144 (*c* 1.0,  $CH_2Cl_2$ ).  $^1H$  NMR (400 MHz,  $CDCl_3$ ):  $\delta$  (ppm) 0.87 (t,  $J$  = 7.2 Hz, 3H), 1.19-1.51 (m, 6H), 1.81-1.92 (m, 3H), 1.97-2.06 (m, 1H), 2.30-2.38 (m, 1H), 2.44-2.52 (m, 1H), 2.63-2.67 (m, 1H), 3.89-3.94 (m, 1H), 4.58-4.63 (m, 1H), 4.82-4.88 (m, 1H), 5.95 (s, 1H), 7.12 (d,  $J$  = 8.4 Hz, 2H), 7.50 (d,  $J$  = 8.4 Hz, 2H).  $^{13}C$  NMR (100 MHz,  $CDCl_3$ ):  $\delta$  (ppm) 23.7, 32.8, 32.8, 37.1, 41.8, 44.5, 75.9, 125.4, 126.8, 127.0, 127.2, 127.6, 128.1, 136.4, 139.1, 164.6, 197.2. HRMS (EI): exact mass calculated for  $[M]^+$  ( $C_{19}H_{24}BrNO_3$ ) requires  $m/z$  393.0904, found  $m/z$  393.0910. The enantiomeric ratio was determined by Daicel Chiralpak IB, *n*-Hexane / EtOH = 4/1, 0.9 mL/min,  $\lambda$  = 220 nm, 11.432 min (minor), 21.310 min (major), ee = 98%.

**6q: (R)-6-((R)-2-nitro-1-phenylethyl)-5,6-dihydro-[1,1'-biphenyl]-3(4H)-one**

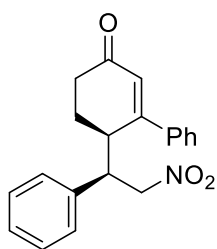

The product was obtained in 80% yield, white solid, Mp 126-127 °C.  $[\alpha]_D^{25}$  -116 (*c* 1.0, CH<sub>2</sub>Cl<sub>2</sub>). <sup>1</sup>H NMR (400 MHz, CDCl<sub>3</sub>): δ (ppm) 2.08-2.16 (m, 1H), 2.26-2.43 (m, 3H), 3.46-3.49 (m, 1H), 3.90-3.96 (m, 1H), 4.47-4.51 (m, 1H), 4.63-4.69 (m, 1H), 6.22 (s, 1H), 7.06-7.08 (m, 2H), 7.16-7.21 (m, 3H), 7.28-7.31 (m, 2H), 7.35-7.38 (m, 3H). <sup>13</sup>C NMR (100 MHz, CDCl<sub>3</sub>): δ (ppm) 25.3, 33.7, 40.7, 46.7, 126.3, 128.0, 128.8, 129.1, 129.3, 129.8, 136.8, 139.1, 161.2, 198.3. HRMS (EI): exact mass calculated for [M]<sup>+</sup> (C<sub>20</sub>H<sub>19</sub>NO<sub>3</sub>) requires *m/z* 321.1365, found *m/z* 321.1368. The enantiomeric ratio was determined by Daicel Chiralpak AD-H (25 cm), *n*-Hexane/*i*PrOH = 7/3, 0.7 mL/min, λ = 254 nm, 8.35 min (major), 9.14 min (minor), ee = 95%.

**6r: (R)-3',5'-dimethoxy-6-((R)-2-nitro-1-phenylethyl)-5,6-dihydro-[1,1'-biphenyl]-3(4H)-one**

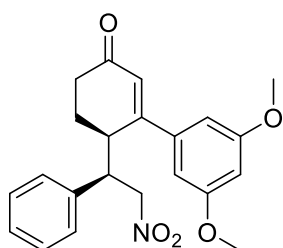

The product was obtained in 74% yield, yellow oil.  $[\alpha]_D^{25}$  -123 (*c* 1.0, CH<sub>2</sub>Cl<sub>2</sub>). <sup>1</sup>H NMR (400 MHz, CDCl<sub>3</sub>): δ (ppm) 2.08-2.15 (m, 1H), 2.23-2.37 (m, 3H), 3.39-3.41 (m, 1H), 3.80 (s, 6H), 3.92-3.97 (m, 1H), 4.50-4.55 (m, 1H), 4.63-4.69 (m, 1H), 6.21 (s, 1H), 6.39-6.40 (m, 2H), 6.45-6.46 (m, 1H), 7.07-7.10 (m, 2H), 7.19-7.21 (m, 3H). <sup>13</sup>C NMR (100 MHz, CDCl<sub>3</sub>): δ (ppm) 25.4, 33.7, 40.8, 46.8, 55.5, 101.3, 104.7, 128.1, 128.2, 128.8, 129.2, 136.9, 141.3, 161.1, 198.4. HRMS (EI): exact mass calculated for [M]<sup>+</sup> (C<sub>22</sub>H<sub>23</sub>NO<sub>5</sub>) requires *m/z* 381.1576, found *m/z* 381.1572. The enantiomeric ratio was determined by Daicel Chiralpak AD-H (25 cm), *n*-Hexane/*i*PrOH = 7/3, 0.7 mL/min, λ = 254 nm, 9.53 min (major), 10.34 min (minor), ee = 93%.

**6s: (R)-6-((R)-2-nitro-1-phenylethyl)-3',5'-bis(trifluoromethyl)-5,6-dihydro-[1,1'-biphenyl]-3(4H)-one**

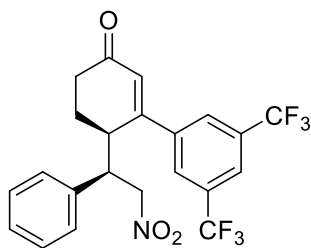

The product was obtained in 67% yield, pale yellow oil.  $[\alpha]_D^{25}$  -127 (*c* 1.0, CH<sub>2</sub>Cl<sub>2</sub>). <sup>1</sup>H NMR (400 MHz, CDCl<sub>3</sub>): δ (ppm) 2.28-2.32 (M, 1H), 2.41-2.50 (m, 1H), 2.59-2.64 (m, 1H), 2.74-2.83 (m, 1H), 3.38-3.40 (m, 1H), 3.74-3.80 (m, 1H), 4.76-4.88 (m, 2H), 6.12 (s, 1H), 6.86-6.87 (m, 2H), 6.93-6.94 (m, 3H), 7.32 (s, 2H), 7.63 (s, 1H). <sup>13</sup>C NMR (100 MHz, CDCl<sub>3</sub>): δ (ppm) 25.7, 32.3, 41.3, 46.2, 78.4, 121.5, 122.2, 122.2, 124.2, 126.2, 128.2, 128.5, 128.7, 129.7, 131.4, 136.1, 142.0, 160.0, 197.4. HRMS (EI): exact mass calculated for [M]<sup>+</sup> (C<sub>22</sub>H<sub>17</sub>F<sub>6</sub>NO<sub>3</sub>) requires *m/z* 457.1113, found *m/z* 457.1116. The enantiomeric ratio was determined by Daicel Chiralpak IB (25 cm), *n*-Hexane/*i*PrOH = 7/3, 0.9 mL/min, λ = 254 nm, 8.34 min (minor), 10.01 min (major), ee = 90%.

**6t: (R)-6-((R)-1-(4-bromophenyl)-2-nitroethyl)-5,6-dihydro-[1,1'-biphenyl]-3(4H)-one**



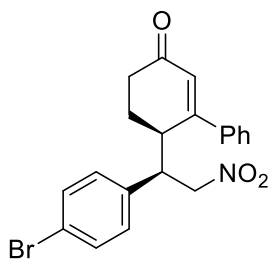

The product was obtained in 60% yield, white solid, Mp 110-111 °C;  $[\alpha]_D^{25}$  -143 (*c* 1.0, CH<sub>2</sub>Cl<sub>2</sub>). <sup>1</sup>H NMR (400 MHz, CDCl<sub>3</sub>): δ (ppm) 2.09-2.15 (m, 1H), 2.28-2.39 (m, 1H), 2.41-2.46 (m, 2H), 3.39-3.43 (m, 1H), 3.83-3.89 (m, 1H), 4.53-4.58 (m, 1H), 4.62-4.68 (m, 1H), 6.19 (s, 1H), 6.89-6.91 (m, 2H), 7.18-7.20 (m, 2H), 7.24-7.26 (m, 2H), 7.31-7.40 (m, 3H). <sup>13</sup>C NMR (100 MHz, CDCl<sub>3</sub>): δ (ppm) 25.3, 33.5, 40.7, 46.1, 122.1, 126.2, 129.0, 129.1, 129.7, 129.8, 131.8, 135.8, 139.0, 161.3, 197.9. HRMS(EI) exact mass calculated for M<sup>+</sup>(C<sub>20</sub>H<sub>18</sub>BrNO<sub>3</sub>) requires *m/z* 399.0470, found *m/z* 399.0473. The enantiomeric ratio was determined by Daicel Chiralpak IA (25 cm), *n*-Hexane / *i*PrOH = 4/1, 1.0 mL/min, λ = 254 nm, 22.12 min (minor), 48.63 min (major), ee = 92%.

**6u: (R)-4-((R)-2-nitro-1-phenylethyl)-3-(phenylethynyl)cyclohex-2-en-1-one**

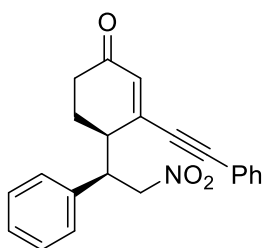

The product was obtained in 74% yield, pale yellow oil.  $[\alpha]_D^{25}$  -143 (*c* 1.0, CH<sub>2</sub>Cl<sub>2</sub>). <sup>1</sup>H NMR (400 MHz, CDCl<sub>3</sub>): δ (ppm) 1.69-1.79 (m, 1H), 2.02-2.09 (m, 1H), 2.18-2.26 (m, 1H), 2.33-2.40 (m, 1H), 2.92-2.97 (m, 1H), 4.55-4.60 (m, 1H), 4.80-4.84 (m, 1H), 4.95-5.01 (m, 1H), 6.42-6.43 (d, *J* = 2.0 Hz, 1H), 7.30-7.33 (m, 5H), 7.36-7.43 (m, 5H), 7.57-7.59 (m, 2H). <sup>13</sup>C NMR (100 MHz, CDCl<sub>3</sub>): δ (ppm) 24.4, 36.3, 43.3, 45.9, 75.0, 86.5, 102.9, 121.3, 128.0, 128.2, 128.7, 129.1, 130.1, 132.3, 134.7, 137.1, 143.0, 197.4. HRMS (EI): exact mass calculated for [M]<sup>+</sup> (C<sub>22</sub>H<sub>19</sub>NO<sub>3</sub>) requires *m/z* 345.1365, found *m/z* 345.1363. The enantiomeric ratio was determined by Daicel Chiralpak AS-H (25 cm), *n*-Hexane / *i*PrOH = 4/1, 0.9 mL/min, λ = 254 nm, 26.10 min (minor), 29.63 min (major), ee >99%.

**7a: (S)-3-ethyl-4-((R)-2-nitro-1-phenylethyl)cyclohex-2-en-1-one**

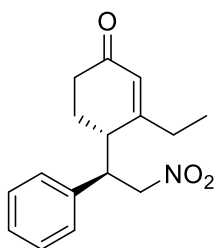

The product was obtained in 66% yield, colorless oil.  $[\alpha]_D^{25}$  43 (*c* 1.0, CH<sub>2</sub>Cl<sub>2</sub>). <sup>1</sup>H NMR (400 MHz, CDCl<sub>3</sub>): δ (ppm) 1.20 (t, *J* = 7.6 Hz, 3H), 1.77-1.82 (m, 1H), 1.93-2.05 (m, 2H), 2.10-2.19 (m, 1H), 2.29-2.38 (m, 1H), 2.42-2.51 (m, 1H), 2.56-2.58 (m, 1H), 3.78-3.84 (m, 1H), 4.70-4.75 (m, 1H), 4.78-4.84 (m, 1H), 5.98 (s, 1H), 7.16-7.18 (m, 2H), 7.30-7.36 (m, 3H). <sup>13</sup>C NMR (100 MHz, CDCl<sub>3</sub>): δ (ppm) 12.0, 24.7, 30.4, 32.6, 40.8, 45.8, 78.9, 126.9, 127.5, 128.4, 129.2, 137.0, 166.4, 198.4. HRMS (EI): exact mass calculated for [M]<sup>+</sup> (C<sub>16</sub>H<sub>19</sub>NO<sub>3</sub>) requires *m/z* 273.1365, found *m/z* 273.1363. The enantiomeric ratio was determined by Daicel Chiralpak IA (25 cm), *n*-Hexane / EtOH = 9/1, 1.0 mL/min, λ = 220 nm, 11.26 min (minor), 16.83 min (major), ee = 98%.

**7c: (S)-3-ethyl-4-((R)-1-(4-methoxyphenyl)-2-nitroethyl)cyclohex-2-en-1-one**

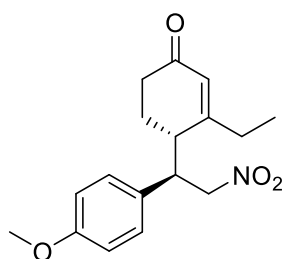

The product was obtained in 66% yield, colorless oil.  $[\alpha]_{\text{D}}^{25}$  34 ( $c$  1.0,  $\text{CH}_2\text{Cl}_2$ ).  $^1\text{H}$  NMR (400 MHz,  $\text{CDCl}_3$ ):  $\delta$  (ppm) 1.20 (t,  $J = 7.6$  Hz, 3H), 1.78-1.86 (m, 1H), 1.93-1.99 (m, 1H), 2.02-2.06 (m, 1H), 2.10-2.18 (m, 1H), 2.93-2.37 (m, 1H), 2.40-2.48 (m, 1H), 2.48-2.54 (m, 1H), 3.75-3.81 (m, 4H), 4.67-4.79 (m, 2H), 5.97 (s, 1H), 6.86 (d,  $J = 8.4$  Hz, 2H), 7.08 (d,  $J = 8.4$  Hz, 2H).  $^{13}\text{C}$  NMR (100 MHz,  $\text{CDCl}_3$ ):  $\delta$  (ppm) 12.0, 24.7, 30.4, 32.6, 40.9, 45.1, 55.3, 79.1, 114.5, 126.9, 128.6, 128.7, 159.4, 166.6, 198.5. HRMS (EI): exact mass calculated for  $[\text{M}]^+$  ( $\text{C}_{17}\text{H}_{21}\text{NO}_4$ ) requires  $m/z$  303.1471, found  $m/z$  303.1469. The enantiomeric ratio was determined by Daicel Chiralpak IA (25 cm),  $n$ -Hexane / EtOH = 9/1, 1.0 mL/min,  $\lambda = 254$  nm, 19.83 min (minor), 34.59 min (major), ee = 99%.

**7d: (S)-3-ethyl-4-((R)-1-(4-fluorophenyl)-2-nitroethyl)cyclohex-2-en-1-one**

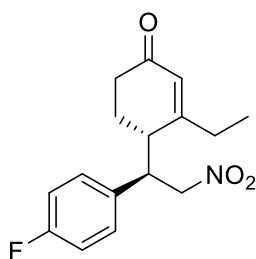

The product was obtained in 57% yield, pale yellow oil.  $[\alpha]_{\text{D}}^{25}$  22 ( $c$  1.0,  $\text{CH}_2\text{Cl}_2$ ).  $^1\text{H}$  NMR (400 MHz,  $\text{CDCl}_3$ ):  $\delta$  (ppm) 1.20 (t,  $J = 7.2$  Hz, 3H), 1.74-1.79 (m, 1H), 1.98-2.04 (m, 1H), 2.07-2.12 (m, 1H), 2.17-2.23 (m, 1H), 2.29-2.35 (m, 1H), 2.39-2.45 (m, 1H), 2.53-2.56 (m, 1H), 3.76-3.82 (m, 1H), 4.66-4.71 (m, 1H), 4.74-4.79 (m, 1H), 5.99 (s, 1H), 7.03-7.08 (m, 2H), 7.15-7.18 (m, 2H).  $^{13}\text{C}$  NMR (100 MHz,  $\text{CDCl}_3$ ):  $\delta$  (ppm) 12.0, 24.8, 30.6, 32.5, 41.0, 45.3, 79.0, 116.2, 116.4, 127.0, 129.1, 129.2, 166.2, 198.1. HRMS (EI): exact mass calculated for  $[\text{M}]^+$  ( $\text{C}_{16}\text{H}_{18}\text{FNO}_3$ ) requires  $m/z$  291.1271, found  $m/z$  291.1271. The enantiomeric ratio was determined by Daicel Chiralpak IA (25 cm),  $n$ -Hexane / EtOH = 9/1, 1.0 mL/min,  $\lambda = 254$  nm, 13.42 min (minor), 22.98 min (major), ee = 96%.

**7e: (S)-4-((R)-1-(4-chlorophenyl)-2-nitroethyl)-3-ethylcyclohex-2-en-1-one**

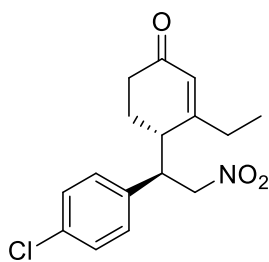

The product was obtained in 52% yield, pale yellow oil.  $[\alpha]_{\text{D}}^{25}$  18 ( $c$  1.0,  $\text{CH}_2\text{Cl}_2$ ).  $^1\text{H}$  NMR (400 MHz,  $\text{CDCl}_3$ ):  $\delta$  (ppm) 1.20 (t,  $J = 7.6$  Hz, 3H), 1.73-1.79 (m, 1H), 1.94-2.03 (m, 1H), 2.10-2.14 (m, 1H), 2.17-2.24 (m, 1H), 2.29-2.37 (m, 1H), 2.39-2.47 (m, 1H), 2.53-2.57 (m, 1H), 3.75-3.81 (m, 1H), 4.65-4.70 (m, 1H), 4.73-4.78 (m, 1H), 5.99 (s, 1H), 7.13 (d,  $J = 8.4$  Hz, 2H), 7.33 (d,  $J = 8.4$  Hz, 2H).  $^{13}\text{C}$  NMR (100 MHz,  $\text{CDCl}_3$ ):  $\delta$  (ppm) 12.0, 24.9, 30.6, 32.5, 40.9, 45.5, 78.9, 127.0, 128.9, 129.4, 130.8, 135.6, 166.2, 198.1. HRMS (EI): exact mass calculated for  $[\text{M}]^+$  ( $\text{C}_{16}\text{H}_{18}\text{ClNO}_3$ ) requires  $m/z$  307.0975, found  $m/z$  307.0979. The enantiomeric ratio was determined by Daicel Chiralpak IB (25 cm),  $n$ -Hexane / EtOH = 4/1, 1.0 mL/min,  $\lambda = 254$  nm, 11.80 min (minor), 12.45 min (major), ee = 97%.

**7f: (S)-4-((R)-1-(4-bromophenyl)-2-nitroethyl)-3-ethylcyclohex-2-en-1-one**

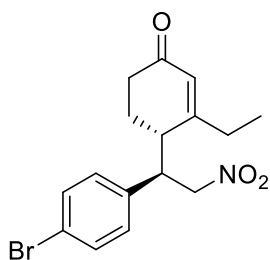

The product was obtained in 70% yield, pale yellow oil.  $[\alpha]_D^{25}$  21 (*c* 1.0, CH<sub>2</sub>Cl<sub>2</sub>). <sup>1</sup>H NMR (400 MHz, CDCl<sub>3</sub>):  $\delta$  (ppm) 1.20 (t, *J* = 7.6 Hz, 3H), 1.73-1.78 (m, 1H), 1.94-2.03 (m, 1H), 2.06-2.15 (m, 1H), 2.18-2.24 (m, 1H), 2.27-2.36 (m, 1H), 2.39-2.47 (m, 1H), 2.53-2.57 (m, 1H), 3.74-3.80 (m, 1H), 4.65-4.70 (m, 1H), 4.73-4.78 (m, 1H), 5.99 (s, 1H), 7.07 (d, *J* = 8.4 Hz, 2H), 7.48 (d, *J* = 8.4 Hz, 2H). <sup>13</sup>C NMR (100 MHz, CDCl<sub>3</sub>):  $\delta$  (ppm) 12.0, 24.9, 30.6, 32.5, 40.8, 45.6, 78.8, 122.4, 127.0, 129.2, 132.4, 136.1, 166.1, 198.0. HRMS (EI): exact mass calculated for [M]<sup>+</sup> (C<sub>16</sub>H<sub>18</sub>BrNO<sub>3</sub>) requires *m/z* 351.0470, found *m/z* 351.0474. The enantiomeric ratio was determined by Daicel Chiralpak IA (25 cm), *n*-Hexane / EtOH = 9/1, 1.0 mL/min,  $\lambda$  = 254 nm, 16.40 min (minor), 33.03min (major), ee = 94%.

**7h: (S)-3-ethyl-4-((R)-1-(naphthalen-2-yl)-2-nitroethyl)cyclohex-2-en-1-one**

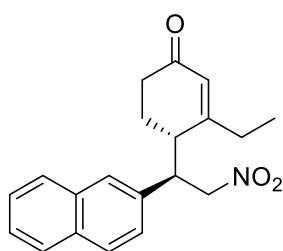

The product was obtained in 63% yield, colorless oil.  $[\alpha]_D^{25}$  22 (*c* 1.0, CH<sub>2</sub>Cl<sub>2</sub>). <sup>1</sup>H NMR (400 MHz, CDCl<sub>3</sub>):  $\delta$  (ppm) 1.22 (t, *J* = 7.2 Hz, 3H), 1.77-1.83 (m, 1H), 1.93-2.02 (m, 1H), 2.17-2.21 (m, 2H), 2.32-2.42 (m, 1H), 2.45-2.54 (m, 1H), 2.66-2.70 (m, 1H), 3.93-3.99 (m, 1H), 4.75-4.79 (m, 1H), 4.87-4.92 (m, 1H), 6.00 (s, 1H), 7.29-7.32 (m, 1H), 7.48-7.53 (m, 2H), 7.64 (s, 1H), 7.78-7.85 (m, 3H). <sup>13</sup>C NMR (100 MHz, CDCl<sub>3</sub>):  $\delta$  (ppm) 12.0, 25.2, 30.8, 32.6, 41.0, 46.3, 79.1, 124.6, 126.6, 126.8, 126.9, 127.1, 127.8, 129.2, 132.9, 133.3, 134.6, 166.7, 198.4. HRMS (EI): exact mass calculated for [M]<sup>+</sup> (C<sub>20</sub>H<sub>21</sub>NO<sub>3</sub>) requires *m/z* 323.1521, found *m/z* 323.1524. The enantiomeric ratio was determined by Daicel Chiralpak IA (25 cm), *n*-Hexane / EtOH = 9/1, 1.0 mL/min,  $\lambda$  = 254 nm, 15.25 min (minor), 19.78 min (major), ee = 98%.

**7i: (S)-3-ethyl-4-((S)-1-(furan-2-yl)-2-nitroethyl)cyclohex-2-en-1-one**

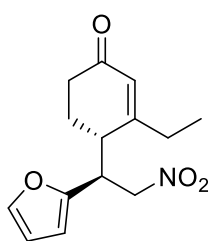

The product was obtained in 52% yield, pale yellow oil.  $[\alpha]_D^{25}$  40 (*c* 1.0, CH<sub>2</sub>Cl<sub>2</sub>). <sup>1</sup>H NMR (400 MHz, CDCl<sub>3</sub>):  $\delta$  (ppm) 1.17 (t, *J* = 7.2 Hz, 3H), 1.71-1.79 (m, 1H), 1.89-1.97 (m, 1H), 2.02-2.11 (m, 1H), 2.14-2.21 (m, 1H), 2.30-2.50 (m, 2H), 4.09-4.14 (m, 1H), 4.74-4.80 (m, 1H), 4.86-4.92 (m, 1H), 5.98 (s, 1H), 6.08 (d, *J* = 3.2 Hz, 2H), 6.30-6.31 (m, 1H), 7.35 (d, *J* = 1.6 Hz, 1H). <sup>13</sup>C NMR (100 MHz, CDCl<sub>3</sub>):  $\delta$  (ppm) 11.8, 23.3, 28.7, 33.4, 38.4, 39.6, 76.1, 108.7, 110.9, 127.2, 142.4, 149.2, 165.0, 198.4. HRMS (EI): exact mass calculated for [M]<sup>+</sup> (C<sub>14</sub>H<sub>17</sub>NO<sub>3</sub>) requires *m/z* 263.1158, found *m/z* 263.1162. The enantiomeric ratio was determined by Daicel Chiralpak IA (25 cm), *n*-Hexane/EtOH = 9/1, 1.0 mL/min,  $\lambda$  = 254 nm, 11.69 min (minor), 15.08 min (major), ee = 93%.

**7j: (S)-4-((R)-2-nitro-1-phenylethyl)-3-propylcyclohex-2-en-1-one**

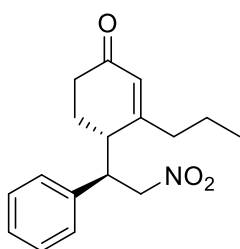

The product was obtained in 63% yield, pale yellow oil.  $[\alpha]_D^{25}$  37 (*c* 1.0, CH<sub>2</sub>Cl<sub>2</sub>). <sup>1</sup>H NMR (400 MHz, CDCl<sub>3</sub>):  $\delta$  (ppm) 1.01 (t, *J* = 7.2 Hz, 3H), 1.50-1.60 (m, 1H), 1.64-1.71 (m, 1H), 1.76-1.80 (m, 1H), 1.93-2.06 (m, 2H), 2.10-2.18 (m, 1H), 2.26-2.41 (m, 2H), 2.55-2.58 (m, 1H), 3.77-3.83 (m, 1H), 4.71-4.76 (m, 1H), 4.79-4.84 (m, 1H), 5.97 (s, 1H), 7.17 (m, 2H), 7.30-7.36 (m, 3H). <sup>13</sup>C NMR (100 MHz, CDCl<sub>3</sub>):  $\delta$  (ppm) 13.9, 21.3, 24.7, 32.5, 39.6, 40.7, 45.9, 79.0, 127.5, 127.9,

128.3, 129.2, 137.0, 165.0, 198.4. HRMS (EI): exact mass calculated for  $[M]^+$  ( $C_{17}H_{21}NO_3$ ) requires  $m/z$  287.1521, found  $m/z$  287.1520. The enantiomeric ratio was determined by Daicel Chiralpak IA (25 cm), *n*-Hexane / EtOH = 9/1, 1.0 mL/min,  $\lambda$  = 254 nm, 10.72 min (minor), 18.97 min (major), ee = 97%.

**7k: (S)-3-butyl-4-((R)-2-nitro-1-phenylethyl)cyclohex-2-en-1-one**

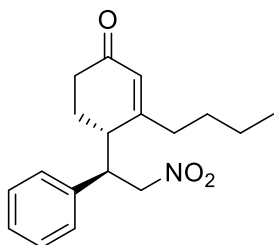

The product was obtained in 66% yield, colorless oil.  $[\alpha]_D^{25}$  36 (*c* 1.0,  $CH_2Cl_2$ ).

$^1H$  NMR (400 MHz,  $CDCl_3$ ):  $\delta$  (ppm) 0.97 (t,  $J$  = 7.6 Hz, 3H), 1.37-1.45 (m, 2H), 1.48-1.54 (m, 1H), 1.58-1.65 (m, 1H), 1.77-1.80 (m, 1H), 1.91-2.06 (m, 2H), 2.09-2.17 (m, 1H), 2.26-2.33 (m, 1H), 2.36-2.44 (m, 1H), 2.56-2.59 (m, 1H), 3.77-3.83 (m, 1H), 4.71-4.76 (m, 1H), 4.78-4.84 (m, 1H), 5.97 (s, 1H), 7.12-7.19 (m, 2H), 7.30-7.36 (m, 3H).  $^{13}C$  NMR (100 MHz,  $CDCl_3$ ):  $\delta$  (ppm)

13.9, 22.5, 24.7, 30.2, 32.5, 37.3, 40.7, 45.9, 79.0, 127.5, 127.8, 128.3, 129.2, 137.0, 165.3, 198.4. HRMS (EI): exact mass calculated for  $[M]^+$  ( $C_{18}H_{23}NO_3$ ) requires  $m/z$  301.1678, found  $m/z$  301.1680. The enantiomeric ratio was determined by Daicel Chiralpak IA (25 cm), *n*-Hexane / EtOH = 9/1, 1.0 mL/min,  $\lambda$  = 254 nm, 10.71 min (minor), 13.08 min (major), ee = 94%.

**7l: (S)-4-((R)-2-nitro-1-phenylethyl)-3-pentylcyclohex-2-en-1-one**

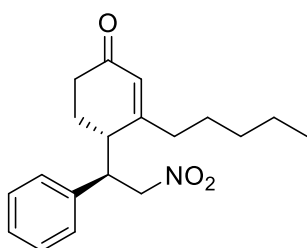

The product was obtained in 55% yield, pale yellow oil.  $[\alpha]_D^{25}$  24 (*c* 1.0,  $CH_2Cl_2$ ).

$^1H$  NMR (400 MHz,  $CDCl_3$ ):  $\delta$  (ppm) 0.97 (t,  $J$  = 7.2 Hz, 3H), 1.39-1.43 (m, 2H), 1.46-1.51 (m, 1H), 1.56-1.65 (m, 3H), 1.76-1.81 (m, 1H), 1.92-2.01 (m, 2H), 2.12-2.28 (m, 1H), 2.26-2.33 (m, 1H), 2.36-2.44 (m, 1H), 2.55-2.59 (m, 1H), 3.78-3.83 (m, 1H), 4.71-4.76 (m, 1H), 4.78-4.83 (m, 1H), 5.97 (s, 1H), 7.16-7.18 (m, 2H), 7.31-7.36 (m, 3H).  $^{13}C$  NMR (100 MHz,  $CDCl_3$ ):  $\delta$  (ppm)

13.9, 22.5, 24.7, 30.2, 32.5, 37.3, 40.7, 45.9, 79.0, 127.5, 127.9, 128.4, 129.2, 137.0, 175.7, 198.4. HRMS (EI): exact mass calculated for  $[M]^+$  ( $C_{19}H_{25}NO_3$ ) requires  $m/z$  315.1834, found  $m/z$  315.1830. The enantiomeric ratio was determined by Daicel Chiralpak IA (25 cm), *n*-Hexane / EtOH = 9/1, 1.0 mL/min,  $\lambda$  = 254 nm, 9.60 min (minor), 11.53 min (major), ee = 96%.

**7m: (S)-3-hexyl-4-((R)-2-nitro-1-phenylethyl)cyclohex-2-en-1-one**

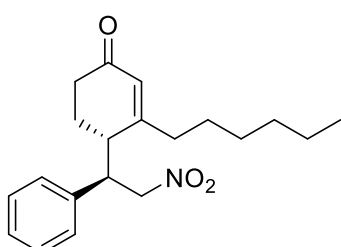

The product was obtained in 64% yield, pale yellow oil.  $[\alpha]_D^{25}$  36 (*c* 1.0,  $CH_2Cl_2$ ).

$^1H$  NMR (400 MHz,  $CDCl_3$ ):  $\delta$  (ppm) 0.91 (t,  $J$  = 6.8 Hz, 3H), 1.32-1.42 (m, 6H), 1.46-1.53 (m, 1H), 1.60-1.65 (m, 1H), 1.76-1.83 (m, 1H), 1.91-2.06 (m, 2H), 2.12-2.17 (m, 1H), 2.25-2.33 (m, 1H), 2.36-2.43 (m, 1H), 2.55-2.58 (m, 1H), 3.77-3.83 (m, 1H), 4.70-4.75 (m, 1H), 4.78-4.84 (m, 1H), 5.96 (s, 1H), 7.16-7.18 (m, 2H), 7.30-7.36 (m, 3H).  $^{13}C$  NMR (100 MHz,  $CDCl_3$ ):  $\delta$  (ppm)

14.0, 22.5, 24.7, 28.0, 29.0, 31.6, 32.5, 37.6, 40.7, 45.9, 79.0, 127.5, 127.8, 128.3, 129.2, 137.0, 165.4, 198.4. HRMS (EI): exact mass calculated for  $[M]^+$  ( $C_{20}H_{27}NO_3$ ) requires  $m/z$  329.1991, found  $m/z$  329.1996. The enantiomeric ratio was determined by Daicel Chiralpak IA (25 cm), *n*-Hexane / EtOH = 9/1, 1.0 mL/min,  $\lambda$  = 254 nm, 8.85 min (minor), 11.77 min (major), ee = 99%.

**7n: (S)-3-benzyl-4-((R)-2-nitro-1-phenylethyl)cyclohex-2-en-1-one**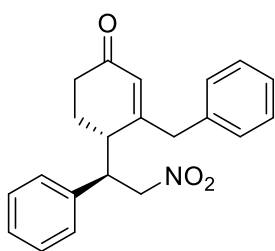

The product was obtained in 58% yield, pale yellow oil.  $[\alpha]_D^{25}$  60 (*c* 1.0, CH<sub>2</sub>Cl<sub>2</sub>). <sup>1</sup>H NMR (400 MHz, CDCl<sub>3</sub>):  $\delta$  (ppm) 1.77-1.90 (m, 3H), 2.04-2.14 (m, 1H), 2.55-2.56 (m, 1H), 3.60 (d, *J* = 15.2 Hz, 1H), 3.78 (d, *J* = 15.2 Hz, 1H), 3.89-3.95 (m, 1H), 4.77-4.82 (m, 1H), 4.84-4.89 (m, 1H), 5.96 (s, 1H), 7.14-7.16 (m, 2H), 7.20-7.22 (m, 2H), 7.28-7.38 (m, 6H). <sup>13</sup>C NMR (100 MHz, CDCl<sub>3</sub>):  $\delta$  (ppm) 24.6, 32.5, 39.4, 43.8, 45.4, 78.8, 127.4, 128.4, 129.1, 129.2, 129.5, 136.4, 136.7, 163.0, 198.3. HRMS (EI): exact mass calculated for [M]<sup>+</sup> (C<sub>21</sub>H<sub>21</sub>NO<sub>3</sub>) requires *m/z* 335.1521, found *m/z* 335.1527. The enantiomeric ratio was determined by Daicel Chiralpak IA (25 cm), *n*-Hexane / EtOH = 4/1, 0.8 mL/min,  $\lambda$  = 254 nm, 12.09 min (major), 13.16 min (minor), ee = 97%.

**7o: (S)-4-((R)-2-nitro-1-phenylethyl)-3-phenethylcyclohex-2-en-1-one**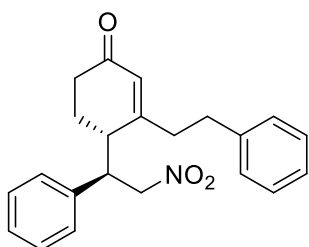

The product was obtained in 68% yield, pale yellow oil.  $[\alpha]_D^{25}$  27 (*c* 1.0, CH<sub>2</sub>Cl<sub>2</sub>). <sup>1</sup>H NMR (400 MHz, CDCl<sub>3</sub>):  $\delta$  (ppm) 1.72-1.79 (m, 1H), 1.85-1.95 (m, 2H), 2.01-2.11 (m, 1H), 2.43-2.46 (m, 1H), 2.59-2.67 (m, 1H), 2.70-2.77 (m, 1H), 2.84-2.96 (m, 2H), 3.76-3.81 (m, 1H), 4.65-4.70 (m, 1H), 4.73-4.78 (m, 1H), 6.02 (s, 1H), 7.07-7.11 (m, 2H), 7.22-7.24 (m, 3H), 7.28-7.35 (m, 5H). <sup>13</sup>C NMR (100 MHz, CDCl<sub>3</sub>):  $\delta$  (ppm) 24.4, 32.4, 34.5, 39.1, 40.8, 45.6, 78.7, 126.6, 127.5, 128.4, 128.4, 128.8, 129.2, 136.8, 140.1, 163.9, 198.2. HRMS (EI): exact mass calculated for [M]<sup>+</sup> (C<sub>22</sub>H<sub>23</sub>NO<sub>3</sub>) requires *m/z* 349.1678, found *m/z* 349.16740. The enantiomeric ratio was determined by Daicel Chiralpak IA (25 cm), *n*-Hexane / EtOH = 9/1, 1.0 mL/min,  $\lambda$  = 254 nm, 13.73 min (minor), 14.52 min (major), ee = 99%

**7p: (S)-4-((R)-1-(4-bromophenyl)-2-nitroethyl)-3-butylcyclohex-2-en-1-one**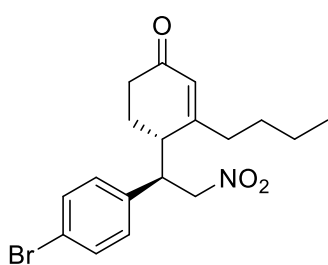

The product was obtained in 56% yield, pale yellow soild.  $[\alpha]_D^{25}$  30 (*c* 1.0, CH<sub>2</sub>Cl<sub>2</sub>). <sup>1</sup>H NMR (400 MHz, CDCl<sub>3</sub>):  $\delta$  (ppm) 0.96 (t, *J* = 7.2 Hz, 3H), 1.35-1.46 (m, 2H), 1.47-1.65 (m, 2H), 1.71-1.77 (m, 1H), 1.92-2.19 (m, 3H), 2.21-2.30 (m, 1H), 2.34-2.42 (m, 1H), 2.53-2.57 (m, 1H), 3.72-3.78 (m, 1H), 4.66-4.78 (m, 2H), 5.97 (s, 1H), 7.08 (d, *J* = 8.4 Hz, 2H), 7.48 (d, *J* = 8.4 Hz, 2H). <sup>13</sup>C NMR (100 MHz, CDCl<sub>3</sub>):  $\delta$  (ppm) 13.9, 22.5, 24.9, 30.2, 32.4, 37.5, 40.7, 45.7, 78.8, 122.4, 127.9, 129.2, 132.4, 136.2, 165.1, 198.0. HRMS (EI): exact mass calculated for [M]<sup>+</sup> (C<sub>18</sub>H<sub>22</sub>BrNO<sub>3</sub>) requires *m/z* 379.0783, found *m/z* 379.0786. The enantiomeric ratio was determined by Daicel Chiralpak IA (25 cm), *n*-Hexane / EtOH = 9/1, 0.8 mL/min,  $\lambda$  = 254 nm, 18.18 min (minor), 29.87 min (major), ee = 99%.

**7q: (S)-6-((R)-2-nitro-1-phenylethyl)-5,6-dihydro-[1,1'-biphenyl]-3(4*H*)-one**

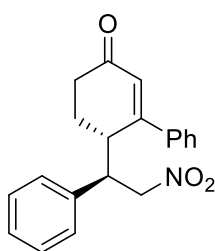

The product was obtained in 69% yield, yellow oil.  $[\alpha]_D^{25}$  107 ( $c$  1.0,  $\text{CH}_2\text{Cl}_2$ ).  $^1\text{H}$  NMR (400 MHz,  $\text{CDCl}_3$ ):  $\delta$  (ppm) 1.85-1.91 (m, 1H), 2.11-2.21 (m, 1H), 2.29-2.35 (m, 1H), 2.37-2.47 (m, 1H), 3.34-3.38 (m, 1H), 3.74-3.80 (m, 1H), 4.27-4.37 (m, 2H), 6.35 (s, 1H), 7.17-7.19 (m, 2H), 7.30-7.38 (m, 3H), 7.51-7.53 (m, 3H), 7.54-7.58 (m, 2H).  $^{13}\text{C}$  NMR (100 MHz,  $\text{CDCl}_3$ ):  $\delta$  (ppm) 25.1, 32.3, 38.9, 46.8, 79.4, 126.3, 127.5, 128.2, 128.4, 129.2, 129.7, 130.7, 137.5, 139.2, 160.7, 198.6.

HRMS(EI) exact mass calculated for  $\text{M}^+(\text{C}_{20}\text{H}_{19}\text{NO}_3)$  requires  $m/z$  321.1365, found  $m/z$  321.1368. The enantiomeric ratio was determined by Daicel Chiralpak AD-H (25 cm),  $n$ -Hexane / EtOH = 7/3, 0.7 mL/min,  $\lambda$  = 254 nm, 11.51 min (minor), 14.95 min (major), ee = 97%.

**7r: (S)-3',5'-dimethoxy-6-((R)-2-nitro-1-phenylethyl)-5,6-dihydro-[1,1'-biphenyl]-3(4H)-one**

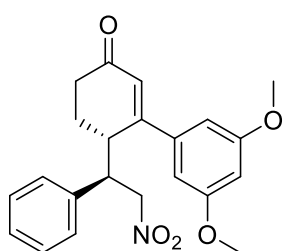

The product was obtained in 72% yield, pale yellow oil.  $[\alpha]_D^{25}$  72 ( $c$  1.0,  $\text{CH}_2\text{Cl}_2$ ).  $^1\text{H}$  NMR (400 MHz,  $\text{CDCl}_3$ ):  $\delta$  (ppm) 1.82-1.87 (m, 1H), 2.09-2.18 (m, 1H), 2.28-2.45 (m, 2H), 3.25-3.29 (m, 1H), 3.73-3.77 (m, 1H), 3.87 (s, 6H), 4.38-4.40 (m, 2H), 6.34 (s, 1H), 6.57-6.58 (m, 1H), 6.66-6.66 (m, 2H), 7.18-7.19 (m, 2H), 7.30-7.37 (m, 3H).  $^{13}\text{C}$  NMR (100 MHz,  $\text{CDCl}_3$ ):  $\delta$  (ppm) 24.0, 31.3, 38.0, 45.8, 54.6, 78.4, 100.9, 103.5, 126.5, 127.1, 127.3, 128.2, 136.5, 140.2, 159.6, 160.6, 197.6. HRMS (EI): exact mass calculated for  $[\text{M}]^+$

( $\text{C}_{22}\text{H}_{23}\text{NO}_5$ ) requires  $m/z$  381.1576, found  $m/z$  381.1579. The enantiomeric ratio was determined by Daicel Chiralpak IB (25 cm),  $n$ -Hexane/ $i$ PrOH = 7/3, 0.9 mL/min,  $\lambda$  = 254 nm, 6.50 min (major), 10.08 min (minor), ee = 99%.

**7s: (S)-6-((R)-2-nitro-1-phenylethyl)-3',5'-bis(trifluoromethyl)-5,6-dihydro-[1,1'-biphenyl]-3(4H)-one**

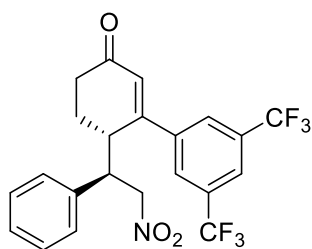

The product was obtained in 49% yield, pale yellow oil.  $[\alpha]_D^{25}$  45 ( $c$  1.0,  $\text{CH}_2\text{Cl}_2$ ).  $^1\text{H}$  NMR (400 MHz,  $\text{CDCl}_3$ ):  $\delta$  (ppm) 2.04-2.10 (m, 1H), 2.18-2.34 (m, 3H), 3.37-3.40 (m, 1H), 3.73-3.79 (m, 1H), 4.42-4.47 (m, 1H), 4.53-4.58 (m, 1H), 6.34 (s, 1H), 7.03-7.05 (m, 2H), 7.32-7.36 (m, 3H), 7.96 (s, 2H), 8.02 (s, 1H).  $^{13}\text{C}$  NMR (100 MHz,  $\text{CDCl}_3$ ):  $\delta$  (ppm) 23.1, 31.7, 37.4, 44.8, 77.3, 120.5, 122.8, 123.2, 125.6, 126.5, 127.7, 128.3, 129.9, 131.6,

131.9, 132.2, 135.1, 140.1, 196.5. HRMS (EI): exact mass calculated for  $[\text{M}]^+$  ( $\text{C}_{22}\text{H}_{17}\text{F}_6\text{NO}_3$ ) requires  $m/z$  457.1113, found  $m/z$  457.1110. The enantiomeric ratio was determined by Daicel Chiralpak IB (25 cm),  $n$ -Hexane/ $i$ PrOH = 7/3, 0.9 mL/min,  $\lambda$  = 254 nm, 10.11 min (major), 11.07 min (minor), ee = 91%.

**7t: (S)-6-((R)-1-(4-bromophenyl)-2-nitroethyl)-5,6-dihydro-[1,1'-biphenyl]-3(4H)-one**

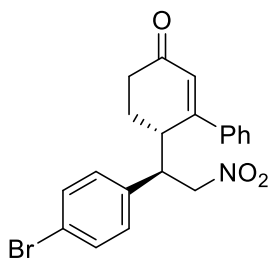

The product was obtained in 68% yield, pale yellow oil.  $[\alpha]_D^{25}$  133 (*c* 1.0, CH<sub>2</sub>Cl<sub>2</sub>). <sup>1</sup>H NMR (400 MHz, CDCl<sub>3</sub>): δ (ppm) 1.82-1.88 (m, 1H), 2.13-2.22 (m, 1H), 2.32-2.49 (m, 2H), 3.30-3.35 (m, 1H), 3.72-3.78 (m, 1H), 4.21-4.33 (m, 2H), 6.35 (s, 1H), 7.06-7.09 (m, 2H), 7.47-7.56 (m, 7H). <sup>13</sup>C NMR (100 MHz, CDCl<sub>3</sub>): δ (ppm) 25.2, 32.3, 38.8, 46.4, 79.2, 122.4, 126.2, 128.3, 129.2, 129.7, 130.8, 132.4, 136.6, 139.1, 160.3, 198.2. HRMS (EI): exact mass calculated for [M]<sup>+</sup> (C<sub>20</sub>H<sub>18</sub>BrNO<sub>3</sub>) requires *m/z* 399.0470, found *m/z* 399.0468.

The enantiomeric ratio was determined by Daicel Chiralpak IA (25 cm), *n*-Hexane / *i*-PrOH = 4/1, 1.0 mL/min, λ = 254 nm, 13.4 min (major), 16.07 min (minor), ee = 97%.

#### 7u: (S)-4-((R)-2-nitro-1-phenylethyl)-3-(phenylethynyl)cyclohex-2-en-1-one

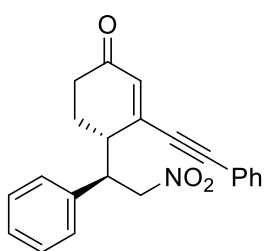

The product was obtained in 55% yield, pale yellow oil.  $[\alpha]_D^{25}$  47 (*c* 1.0, CH<sub>2</sub>Cl<sub>2</sub>). <sup>1</sup>H NMR (400 MHz, CDCl<sub>3</sub>): δ (ppm) 1.68-1.76 (m, 1H), 2.03-2.12 (m, 1H), 2.26-2.41 (m, 2H), 2.85-2.89 (m, 1H), 4.08-4.14 (m, 1H), 4.86-4.92 (m, 1H), 5.10-5.14 (m, 1H), 6.37 (s, 1H), 7.28-7.36 (m, 5H), 7.42-7.45 (m, 3H), 7.56-7.58 (m, 2H). <sup>13</sup>C NMR (100 MHz, CDCl<sub>3</sub>): δ (ppm) 23.6, 32.4, 40.5, 45.3, 77.9, 87.3, 101.4, 120.4, 126.8, 127.3, 127.7, 128.2, 129.0, 131.0, 133.0, 135.8, 142.3, 196.3. HRMS (EI): exact mass calculated for [M]<sup>+</sup> (C<sub>22</sub>H<sub>19</sub>NO<sub>3</sub>) requires *m/z* 345.1365, found *m/z* 345.1367.

The enantiomeric ratio was determined by Daicel Chiralpak AS-H (25 cm), *n*-Hexane / *i*-PrOH = 4/1, 0.9 mL/min, λ = 254 nm, 19.80 min (minor), 20.67 min (major), ee = 99%.

#### 10: 2-((1S,2R)-2-(3-oxocyclohex-1-en-1-yl)-1-phenylpropyl)malononitrile

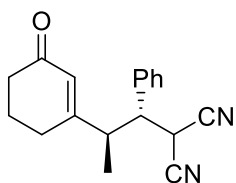

The product was obtained in 66% yield, white solid.  $[\alpha]_D^{25}$  20 (*c* 1.0, CH<sub>2</sub>Cl<sub>2</sub>). <sup>1</sup>H NMR (400 MHz, CDCl<sub>3</sub>): δ (ppm) 1.37-1.39 (d, *J* = 6.8 Hz, 3H), 1.62-1.78 (m, 2H), 2.02-2.05 (m, 2H), 2.15-2.18 (m, 2H), 3.06-3.11 (m, 1H), 3.20-3.24 (m, 1H), 4.26-4.28 (d, *J* = 4.8 Hz, 1H), 5.80 (s, 1H), 7.28-7.32 (m, 2H), 7.35-7.40 (m, 3H). <sup>13</sup>C NMR (100 MHz, CDCl<sub>3</sub>): δ (ppm) 17.0, 21.4, 26.3, 26.7, 36.2, 42.7, 48.9, 110.4, 110.6, 126.8, 127.1, 128.2, 128.3, 134.5, 164.2, 198.3. HRMS (EI): exact mass calculated for [M]<sup>+</sup> (C<sub>18</sub>H<sub>12</sub>N<sub>2</sub>O) requires *m/z* 278.1419, found *m/z* 278.1417.

The enantiomeric ratio was determined by Daicel Chiralpak AY-H (25 cm), *n*-Hexane / *i*-PrOH = 7/3, 0.7 mL/min, λ = 254 nm, 20.38 min (minor), 29.24 min (major), ee = 38%.

#### 11: 2-((1S,2S)-2-(3-oxocyclohex-1-en-1-yl)-1-phenylpropyl)malononitrile

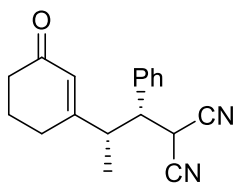

The product was obtained in 57% yield, white solid.  $[\alpha]_D^{25}$  47 (*c* 1.0, CH<sub>2</sub>Cl<sub>2</sub>). <sup>1</sup>H NMR (400 MHz, CDCl<sub>3</sub>): δ (ppm) 0.98 (d, *J* = 6.8 Hz, 3H), 2.04-2.16 (m, 2H), 2.35-2.54 (m, 4H), 3.02-3.10 (m, 1H), 3.19-3.22 (m, 1H), 4.06-4.07 (m, 1H), 6.15 (s, 1H), 7.39-7.41 (m, 2H), 7.43-7.48 (m, 3H). <sup>13</sup>C NMR (100 MHz, CDCl<sub>3</sub>): δ (ppm) 16.9, 21.6, 25.7, 27.4, 36.5, 42.7, 48.1, 110.3, 110.7, 126.9, 127.3, 128.4, 128.5, 133.8, 163.6, 197.9. HRMS (EI): exact mass calculated for [M]<sup>+</sup> (C<sub>18</sub>H<sub>12</sub>N<sub>2</sub>O) requires *m/z* 278.1419, found *m/z* 278.1416.

The enantiomeric ratio was determined by Daicel Chiralpak AY-H (25 cm), *n*-Hexane / *i*-PrOH = 7/3, 0.7 mL/min, λ = 254 nm, 13.72 min (minor), 20.86 min (major), ee =

40%.

**12a: (S)-3-((R)-4-oxo-2-((E)-styryl)cyclohex-2-en-1-yl)-1-phenylpyrrolidine-2,5-dione**

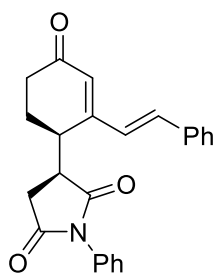

The product was obtained in 68% yield, white solid. Mp 170-171°C. <sup>1</sup>H NMR (400MHz, CDCl<sub>3</sub>): δ 2.20-2.25(m, 1H), 2.33-2.50 (m, 2H), 2.54-2.59 (m, 1H), 2.69-2.75 (m, 1H), 2.96-3.03 (m, 1H), 3.28-3.33 (m, 1H), 3.83-3.85 (m, 1H), 6.32 (s, 1H), 6.74-6.78 (d, *J* = 16 Hz, 1H), 7.03-7.07 (m, 3H), 7.31-7.38 (m, 5H), 7.44-7.46 (m, 2H). <sup>13</sup>C NMR(100MHz, CDCl<sub>3</sub>): δ 29.7, 32.1, 34.2, 35.1, 43.7, 126.5, 127.0, 127.6, 128.7, 128.9, 129.0, 129.0, 129.7, 131.4, 135.2, 137.3, 156.1, 174.6, 178.2, 198.3; HRMS(EI) exact mass calculated for M<sup>+</sup>(C<sub>24</sub>H<sub>21</sub>NO<sub>3</sub>) requires *m/z* 371.1521,

found *m/z* 371.1524; The enantiomeric excess was determined by Daicel Chiralpak AS-H, *n*-Hexane / EtOH = 4:1, 0.7 mL/min, λ = 254 nm, 38.06 min (minor), 43.63 min (major), ee = 99%.

**12b: (S)-3-((R)-2-((E)-4-chlorostyryl)-4-oxocyclohex-2-en-1-yl)-1-phenylpyrrolidine-2,5-dione**

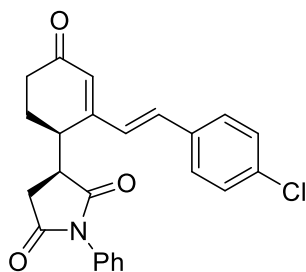

The product was obtained in 50% yield, white solid. Mp 183-184°C. <sup>1</sup>H NMR(400MHz, CDCl<sub>3</sub>): δ 2.21-2.27(m, 1H), 2.38-2.48(m, 2H), 2.54-2.58(m, 1H), δ 2.65-2.71 (m, 1H), 2.94-3.01 (m, 1H), 3.26-3.31(m, 1H), 3.80-3.82 (m, 1H), 6.32 (s, 1H), 6.72-6.76 (d, *J* = 16.4 Hz, 1H), 6.89-6.91(m, 2H), 7.00-7.05 (d, *J* = 16.4 Hz, 1H), δ 7.24-7.734 (m, 7H); <sup>13</sup>C NMR(100MHz, CDCl<sub>3</sub>): δ 29.7, 32.1, 34.2, 35.0, 43.7, 126.3, 127.7, 128.7, 128.8, 129.0, 129.2, 129.3, 131.4, 133.8, 135.5, 135.8, 155.7, 174.6, 178.2,

198.1. HRMS(EI) exact mass calculated for M<sup>+</sup> (C<sub>24</sub>H<sub>20</sub>ClNO<sub>3</sub>) requires *m/z* 405.1132, found *m/z* 405.1133; The enantiomeric excess was determined by Daicel Chiralpak AS-H, *n*-Hexane / EtOH = 7:3, 0.7 mL/min, λ = 254 nm, 27.61 min (minor), 36.87 min (major), ee = 98%.

**14: (2R,3R,4R,5R,6S)-5-methyl-3-nitro-8-oxo-2,4-diphenylspiro[5.5]undecane-1,1-dicarbonitrile**

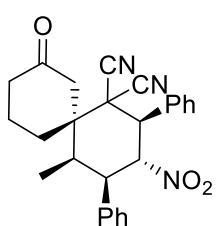

The product was obtained in 75% yield, white solid. <sup>1</sup>H NMR (400 MHz, CDCl<sub>3</sub>) δ (ppm) 1.11 (d, *J* = 7.6 Hz, 3H), 1.66-1.83 (m, 1H), 2.02-2.26 (m, 3H), 2.44-2.60 (m, 3H), 2.96 (d, *J* = 13.6 Hz, 1H), 3.38-3.44 (m, 1H), 3.88 (dd, *J*<sub>1</sub> = 4.0 Hz, *J*<sub>2</sub> = 12.0 Hz, 1H), 4.07 (d, *J* = 12.0 Hz, 1H), 5.82 (t, *J* = 12.0 Hz, 1H), 7.20-7.25 (m, 2H), 7.26-7.37 (m, 3H), 7.43-7.48 (m, 3H), 7.57 (s, 2H). <sup>13</sup>C NMR (100 MHz, d<sub>6</sub>-DMSO): δ (ppm) 9.54, 19.8, 31.9, 39.0, 46.1, 47.7, 47.8, 48.1, 49.0, 79.6, 84.2,

113.9, 128.1, 128.8, 128.9, 130.2, 132.4, 137.4, 208.4. HRMS (EI): exact mass calculated for [M]<sup>+</sup> (C<sub>26</sub>H<sub>25</sub>N<sub>3</sub>O<sub>3</sub>) requires *m/z* 427.1896, found *m/z* 427.1898. The enantiomeric ratio was determined by Daicel Chiralpak IA (25 cm), *n*-Hexane / EtOH = 9/1, 1.0 mL/min, λ = 220 nm, 11.38 min (minor), 13.87 min (major), ee = 84%.

**15: (2R,3R,4R,5S,6R)-5-methyl-3-nitro-8-oxo-2,4-diphenylspiro[5.5]undecane-1,1-dicarbonitrile**



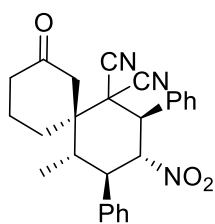

The product was obtained in 70% yield, white solid;  $^1\text{H}$  NMR (400 MHz,  $\text{d}_6\text{-DMSO}$ )  $\delta$  (ppm) 0.64 (d,  $J = 6.8$  Hz, 3H), 2.00-2.16 (m, 2H), 2.22-2.42 (m, 4H), 2.46-2.47 (m, 1H), 2.68-2.83 (m, 2H), 3.29-3.32 (m, 1H), 4.39 (d,  $J = 12$  Hz, 1H), 5.60-5.66 (t,  $J = 11.6$  Hz, 1H), 7.10-7.11 (m, 1H), 7.26-7.33 (m, 2H), 7.45-7.47 (m, 4H), 7.64-7.65 (m, 1H), 7.77-7.78 (m, 2H).  $^{13}\text{C}$  NMR (100 MHz,  $\text{d}_6\text{-DMSO}$ ):  $\delta$  (ppm) 13.8, 20.55, 24.8, 38.5, 42.8, 46.4, 46.7, 49.2, 49.3, 52.8, 55.4, 90.6, 113.2, 113.9, 126.3, 128.6, 129.0, 129.2, 129.8, 130.3, 131.0, 132.4, 137.2, 209.5. HRMS (EI): exact mass calculated for  $[\text{M}]^+$  ( $\text{C}_{26}\text{H}_{25}\text{N}_3\text{O}_3$ ) requires  $m/z$  427.1896, found  $m/z$  427.1892. The enantiomeric ratio was determined by Daicel Chiralpak IA (25 cm),  $n\text{-Hexane} / \text{EtOH} = 9/1$ , 1.0 mL/min,  $\lambda = 220$  nm, 13.50 min (minor), 15.73 min (major), ee = 83%.

**16: (2R,3R,4R,4aR,8aR)-8a-ethyl-3-nitro-7-oxo-2,4-diphenyloctahydronaphthalene-1,1(2H)-dicarbonitrile**

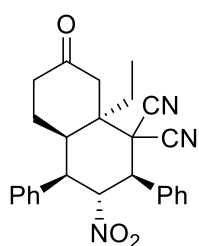

The product was obtained in 72% yield, white solid;  $^1\text{H}$  NMR (400 MHz,  $\text{CDCl}_3$ )  $\delta$  (ppm) 1.20-1.23 (t,  $J = 6.8$  Hz, 3H), 1.80-1.90 (m, 2H), 2.04-2.13 (m, 1H), 2.39-2.48 (m, 3H), 2.53-2.57 (m, 2H), 2.63-2.67 (m, 1H), 3.79-3.83 (m, 1H), 4.04-4.06 (d,  $J = 12$  Hz, 1H), 5.75-5.81 (t,  $J = 12$  Hz, 3H), 7.20-7.21 (m, 2H), 7.26-7.34 (m, 3H), 7.37-7.39 (m, 3H), 7.49 (m, 2H).  $^{13}\text{C}$  NMR (100 MHz,  $\text{CDCl}_3$ ):  $\delta$  (ppm) 8.1, 22.2, 28.6, 39.3, 40.3, 45.9, 46.3, 46.7, 48.6, 49.9, 84.0, 112.2, 113.9, 128.1, 128.6, 129.2, 129.3, 130.4, 130.6, 135.2, 205.5. HRMS (EI): exact mass calculated for  $[\text{M}]^+$  ( $\text{C}_{26}\text{H}_{25}\text{N}_3\text{O}_3$ ) requires  $m/z$  427.1896, found  $m/z$  427.1894. The enantiomeric ratio was determined by Daicel Chiralpak AD (25 cm),  $n\text{-Hexane} / \text{EtOH} = 7/3$ , 0.55 mL/min,  $\lambda = 220$  nm, 15.23 min (minor), 16.89 min (major), ee = 88%.

**17: (2R,3R,4R,4aS,8aS)-8a-ethyl-3-nitro-7-oxo-2,4-diphenyloctahydronaphthalene-1,1(2H)-dicarbonitrile**

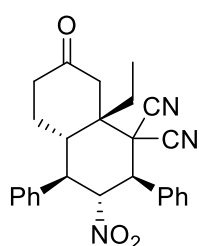

The product was obtained in 80% yield, white solid;  $^1\text{H}$  NMR (400 MHz,  $\text{CDCl}_3$ )  $\delta$  (ppm) 1.22-1.26 (t,  $J = 7.6$  Hz, 3H), 1.58-1.62 (m, 1H), 1.85-2.04 (m, 3H), 2.29-2.51 (m, 3H), 2.90-2.93 (m, 1H), 3.00-3.04 (m, 1H), 3.66-3.72 (t,  $J = 11.6$  Hz, 1H), 3.94 (d,  $J = 12$  Hz, 1H), 5.44-5.50 (t,  $J = 11.6$  Hz, 1H), 7.07-7.09 (m, 1H), 7.32-7.38 (m, 2H), 7.40-7.44 (m, 3H), 7.51-7.54 (m, 4H).  $^{13}\text{C}$  NMR (100 MHz,  $\text{CDCl}_3$ ):  $\delta$  (ppm) 7.7, 12.1, 21.6, 28.7, 31.0, 34.1, 39.6, 40.9, 46.0, 46.2, 47.4, 48.1, 89.8, 111.0, 111.4, 128.2, 128.3, 129.2, 129.5, 134.6, 204.4. HRMS (EI): exact mass calculated for  $[\text{M}]^+$  ( $\text{C}_{26}\text{H}_{25}\text{N}_3\text{O}_3$ ) requires  $m/z$  427.1896, found  $m/z$  427.1897. The enantiomeric ratio was determined by Daicel Chiralpak AD (25 cm),  $n\text{-Hexane} / \text{EtOH} = 7/3$ , 0.55 mL/min,  $\lambda = 220$  nm, 13.50 min (minor), 15.25 min (major), ee = 84%.

## E: NMR spectra of substrates and products

### 1'a: 3-ethylcyclohex-3-en-1-one

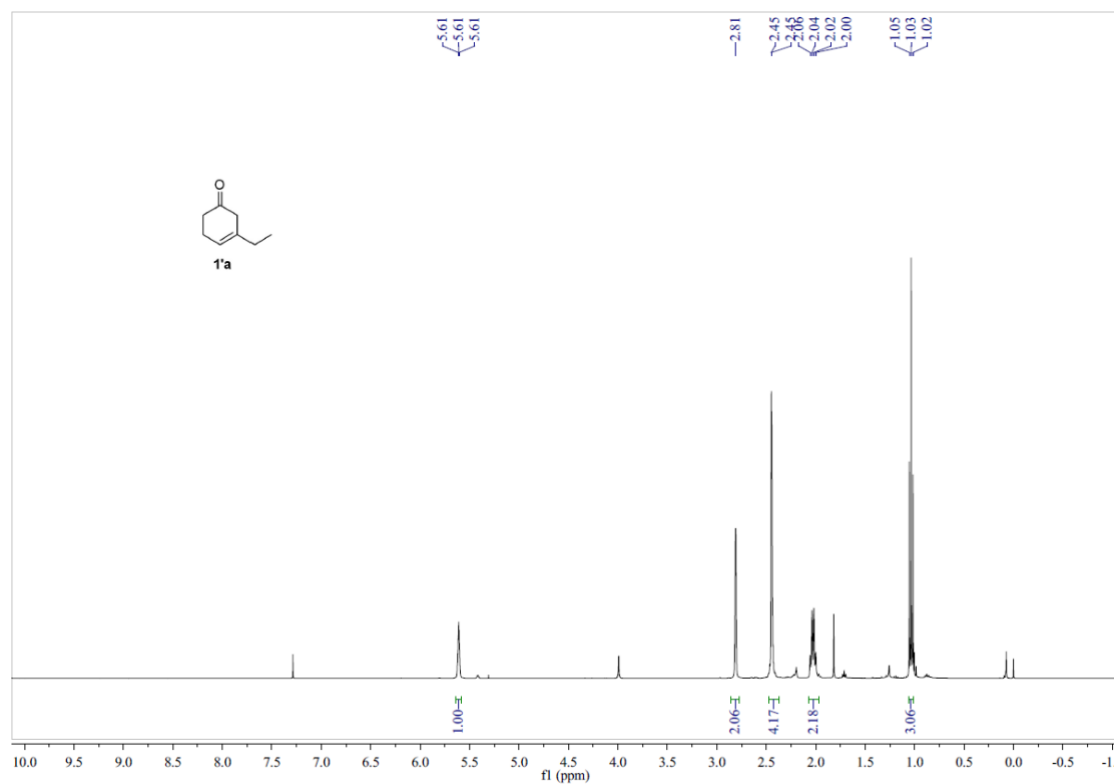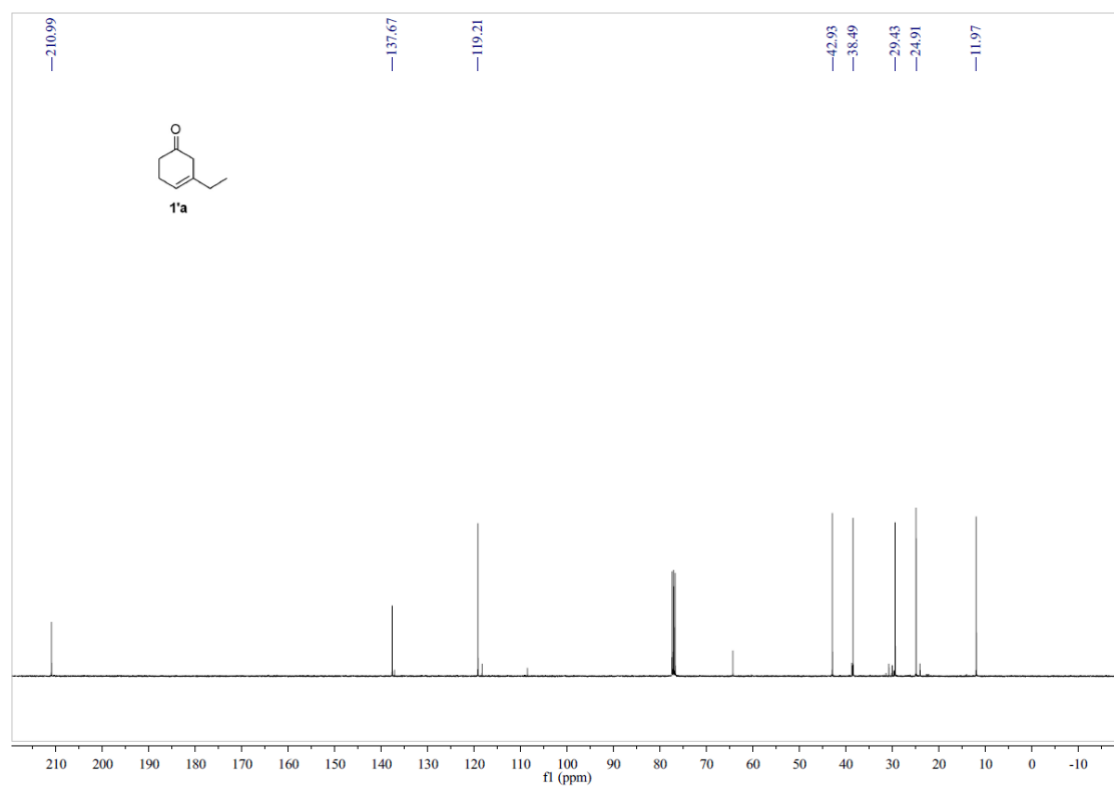

**1'f: 3-benzylcyclohex-3-en-1-one**

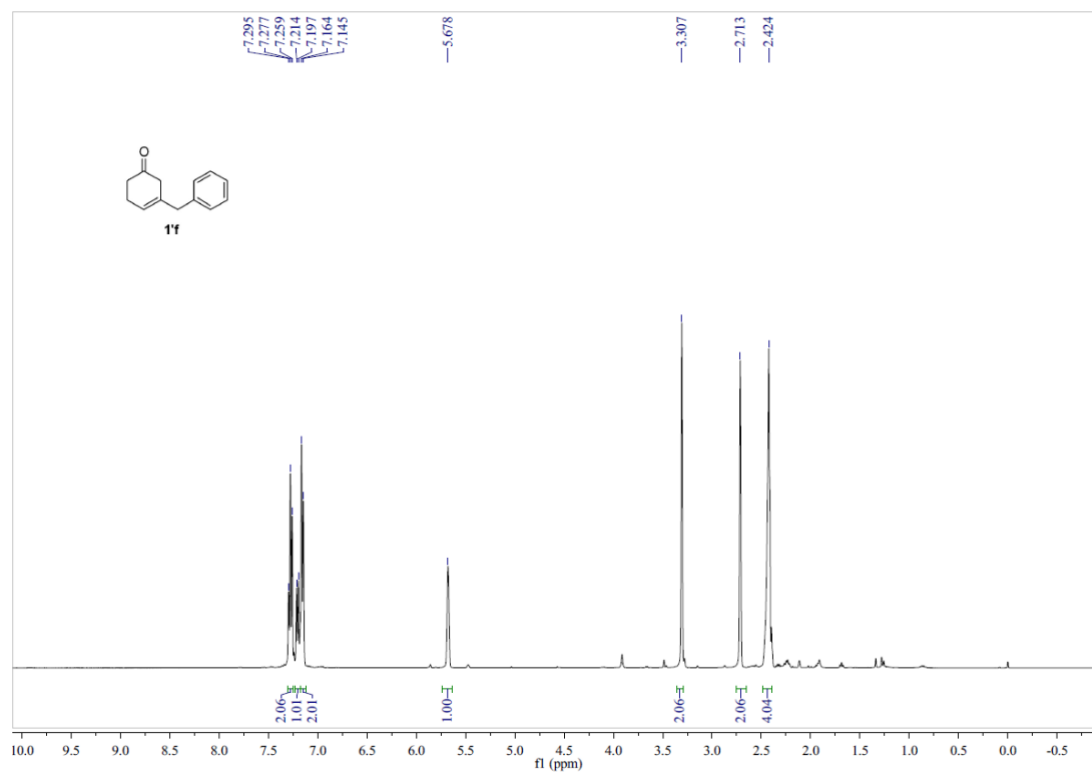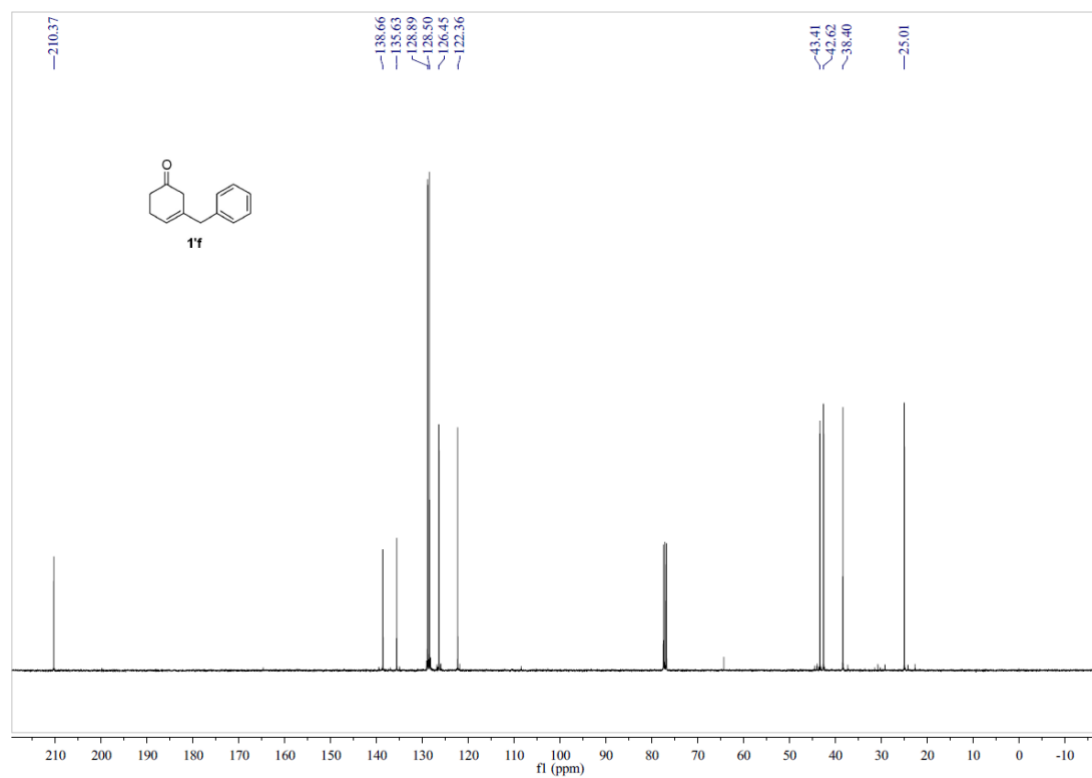

# 1'g: 3-phenethylcyclohex-3-en-1-one

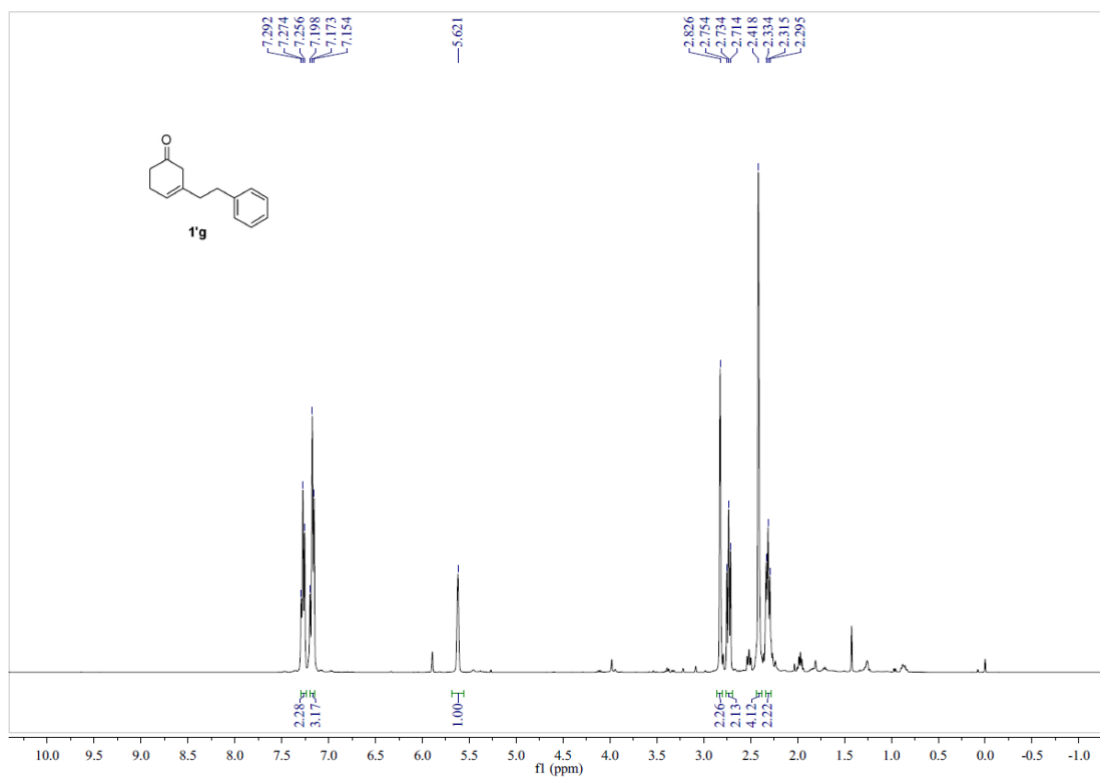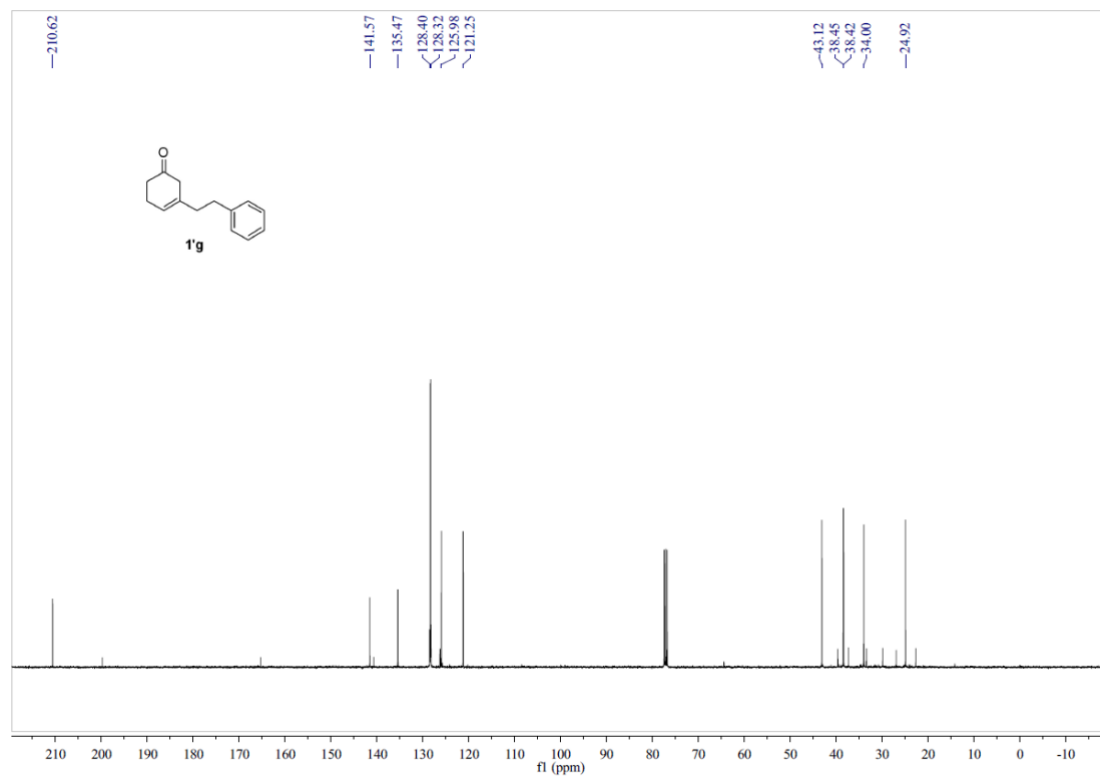

# 1'q:4,5-dihydro-[1,1'-biphenyl]-3(2H)-one

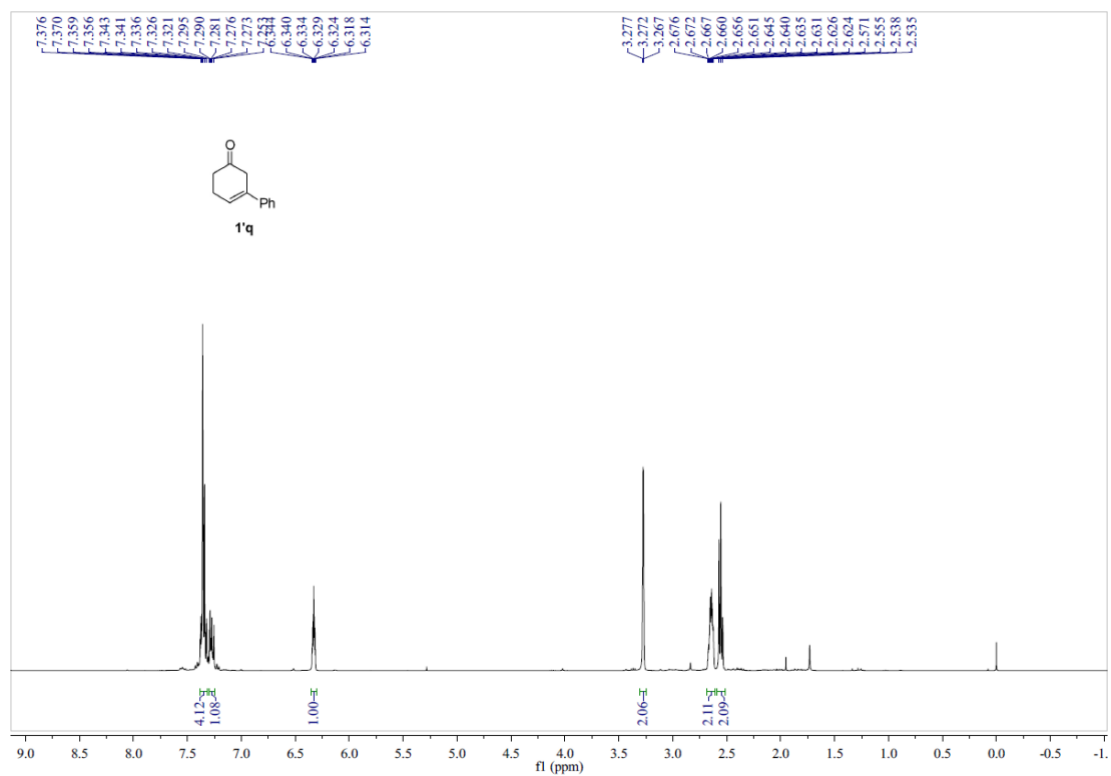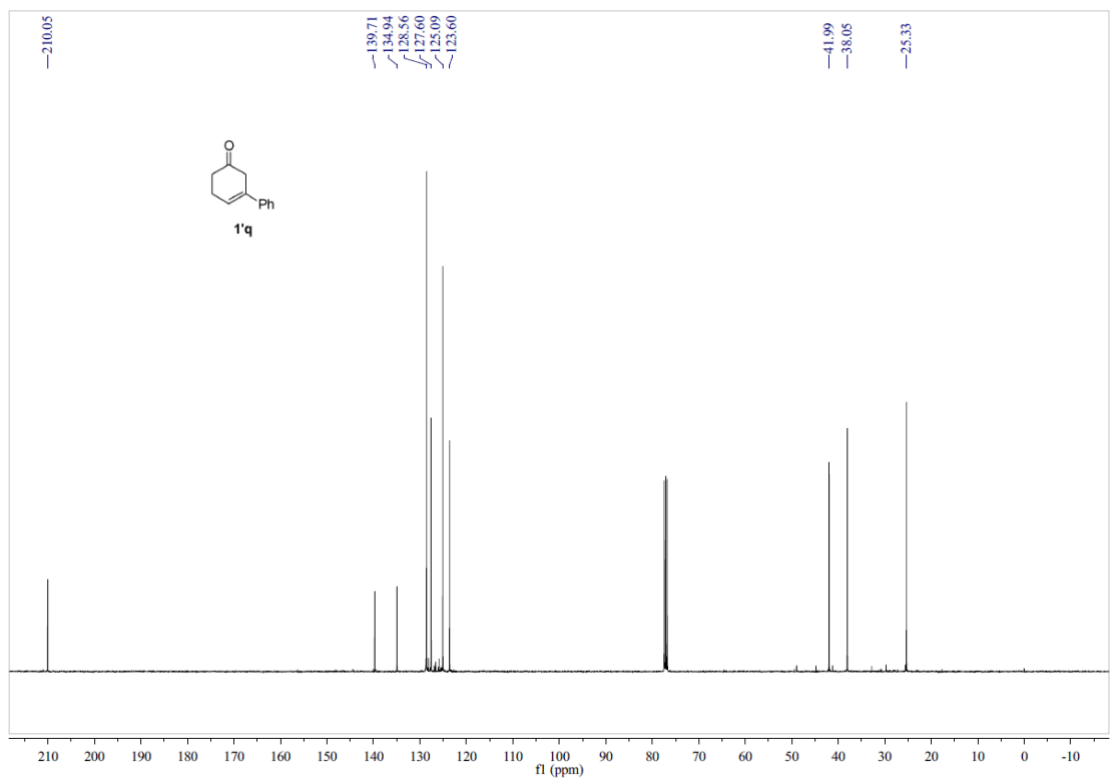

**1'r: 3',5'-dimethoxy-4,5-dihydro-[1,1'-biphenyl]-3(2H)-one**

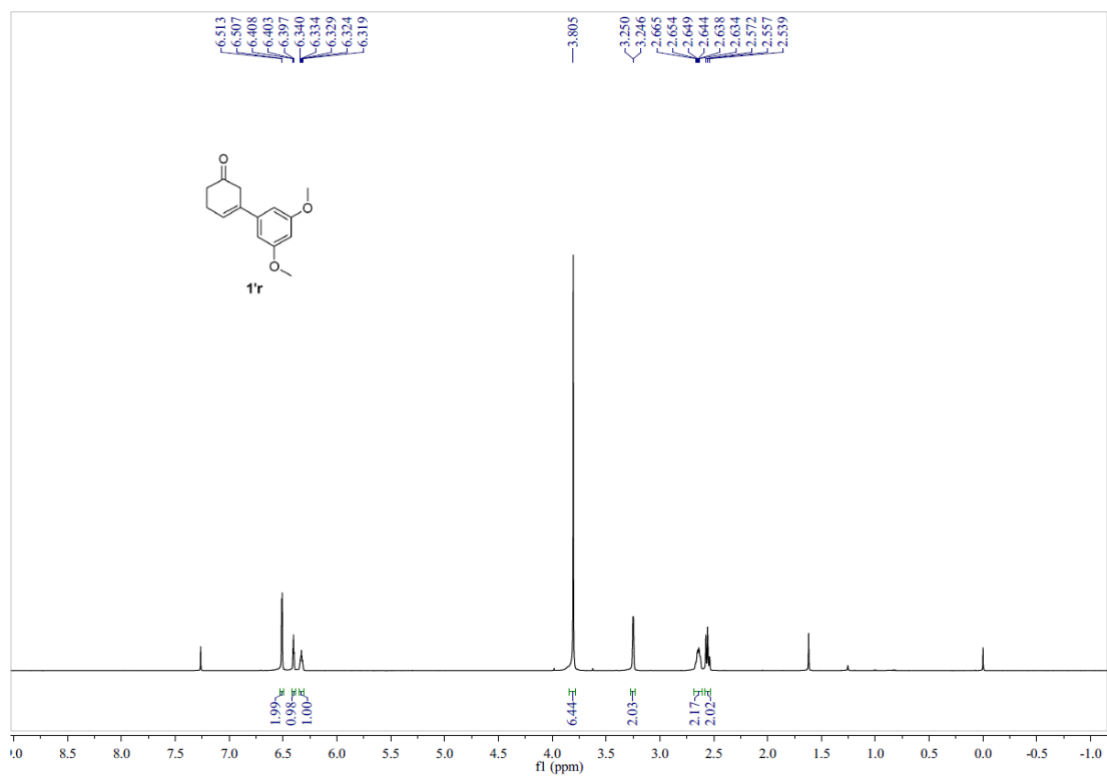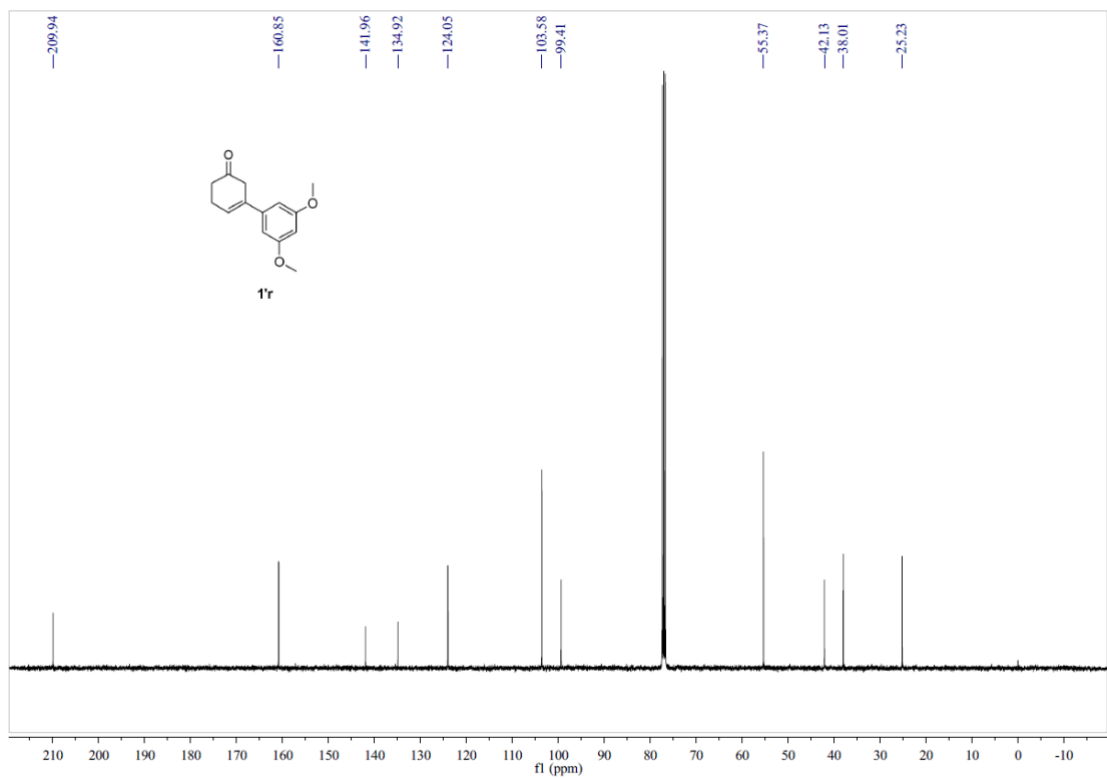

**1's: 3',5'-bis(trifluoromethyl)-4,5-dihydro-[1,1'-biphenyl]-3(2H)-one**

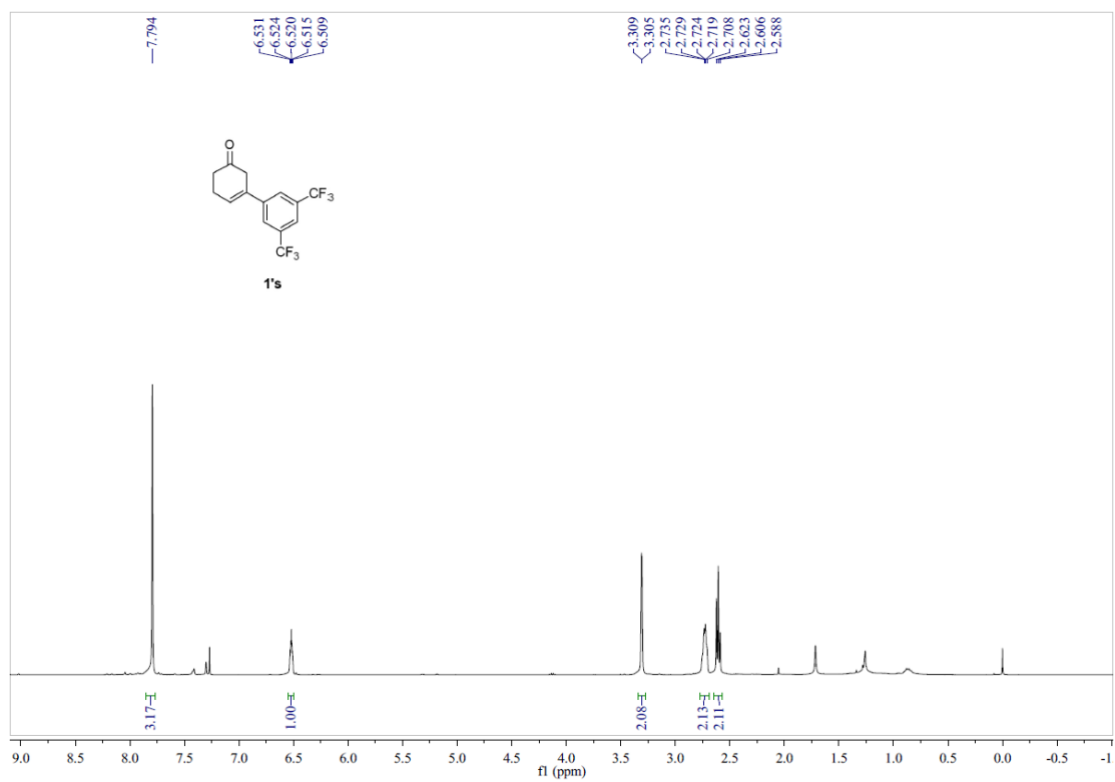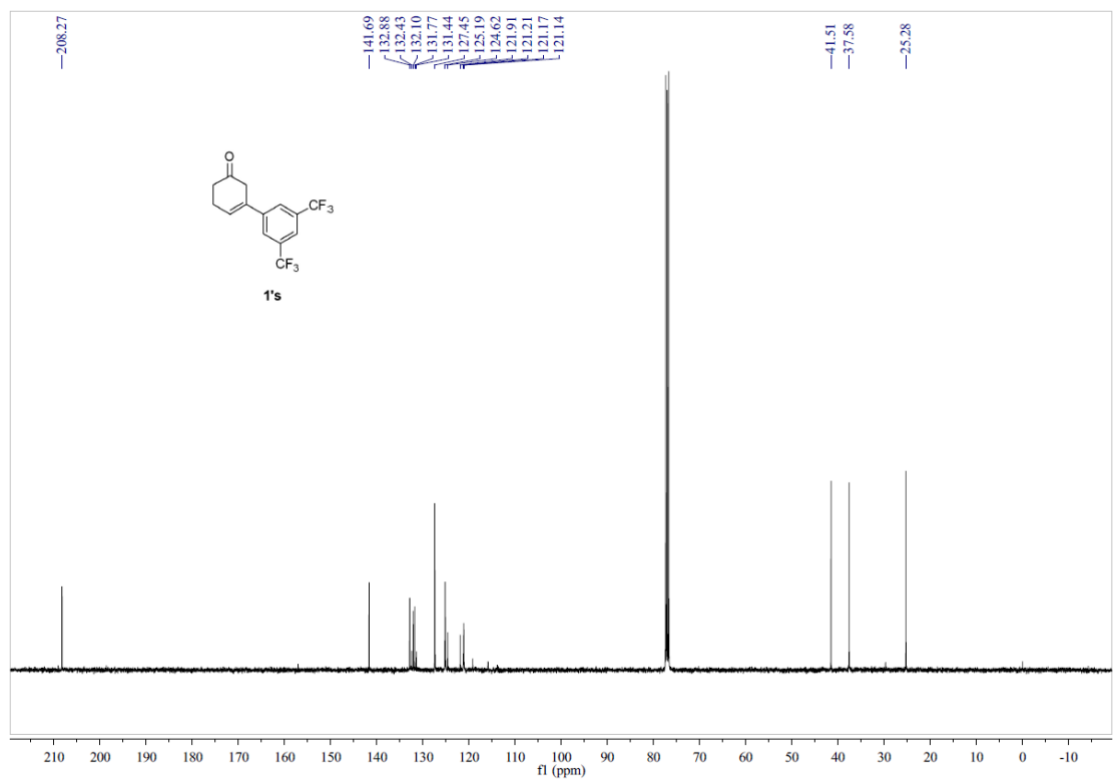

1'u: 3-(phenylethynyl)cyclohex-3-en-1-one

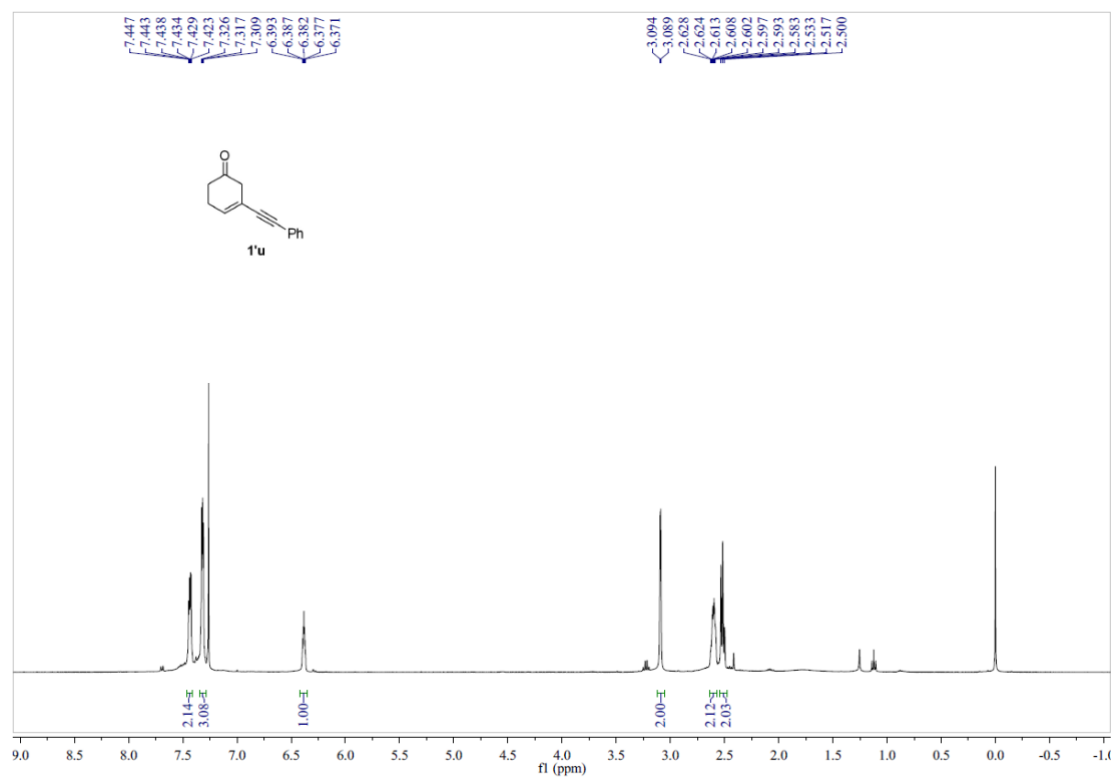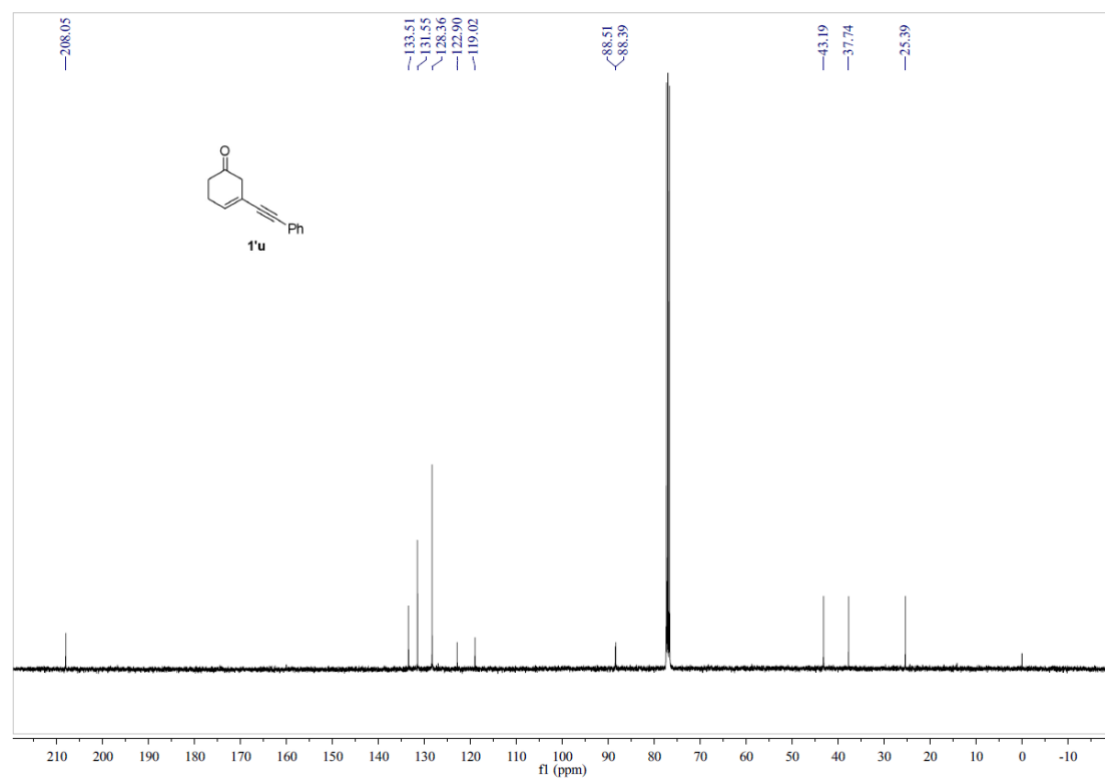



1'v: (E)-3-styrylcyclohex-3-en-1-one

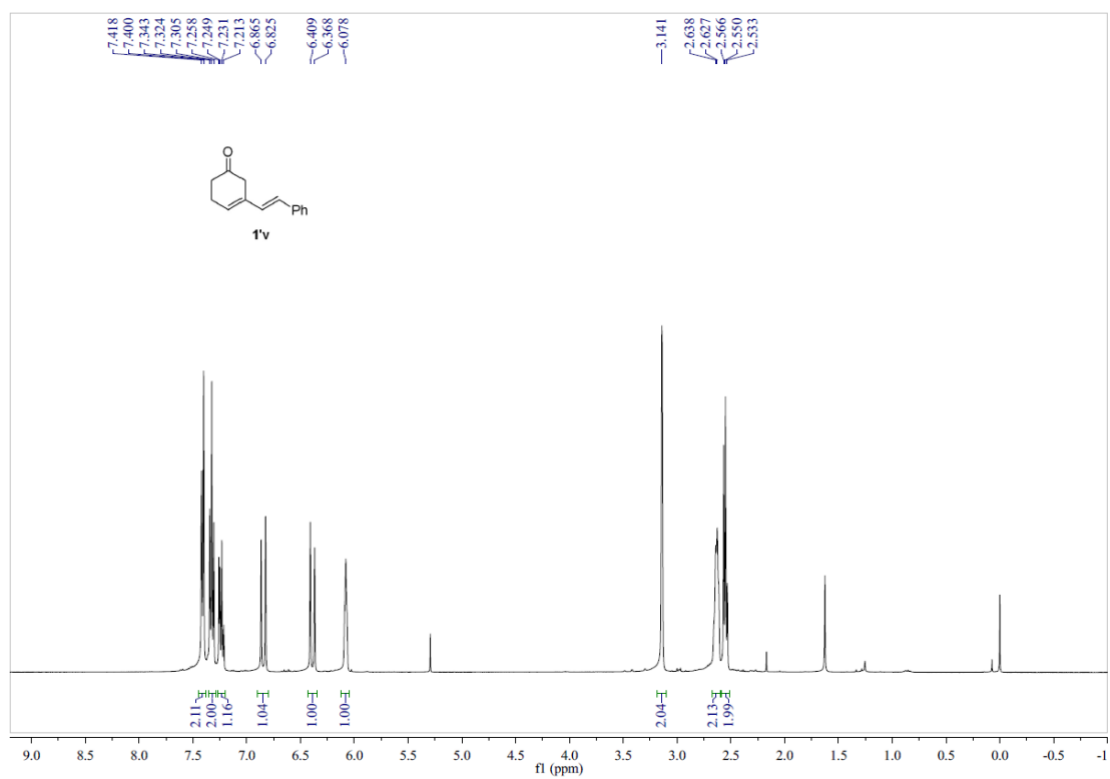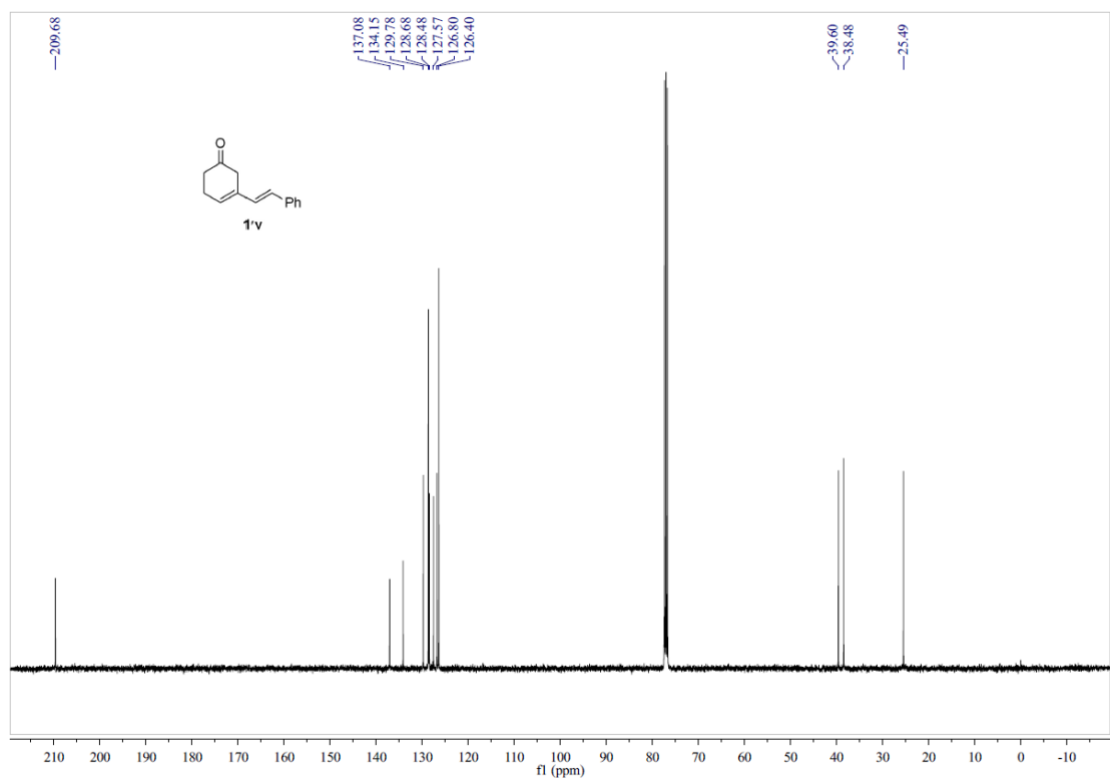

4a: 3-((2R,3R)-4-nitro-3-phenylbutan-2-yl)cyclohex-2-en-1-one

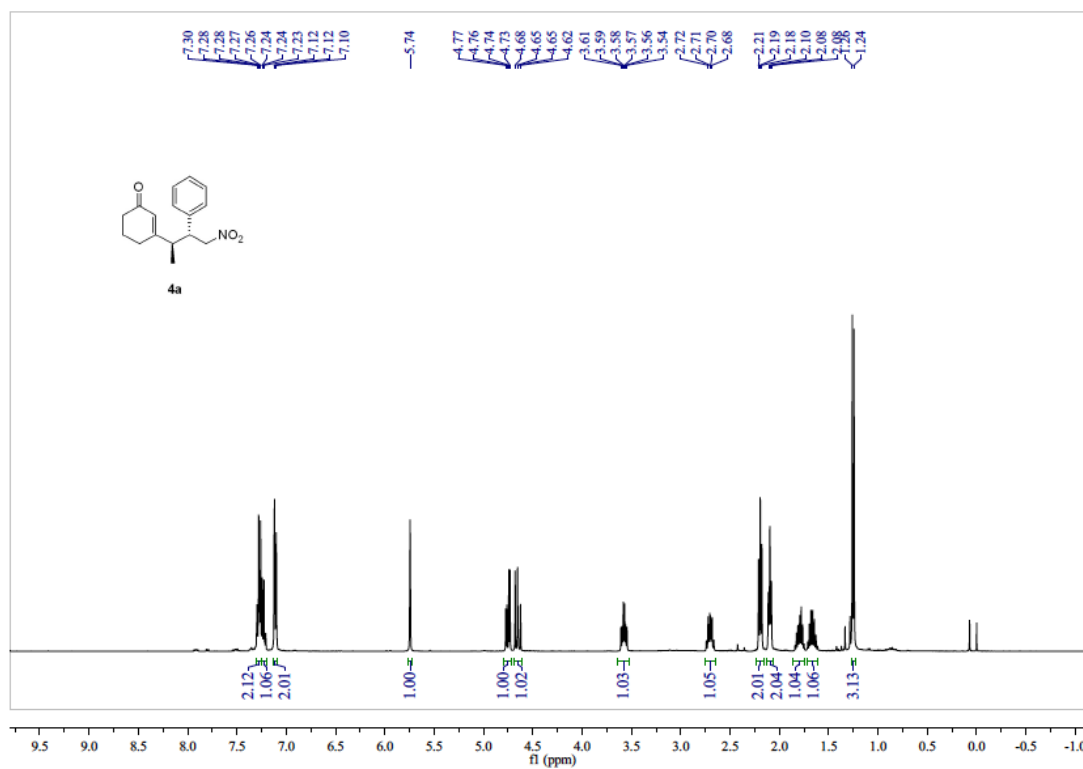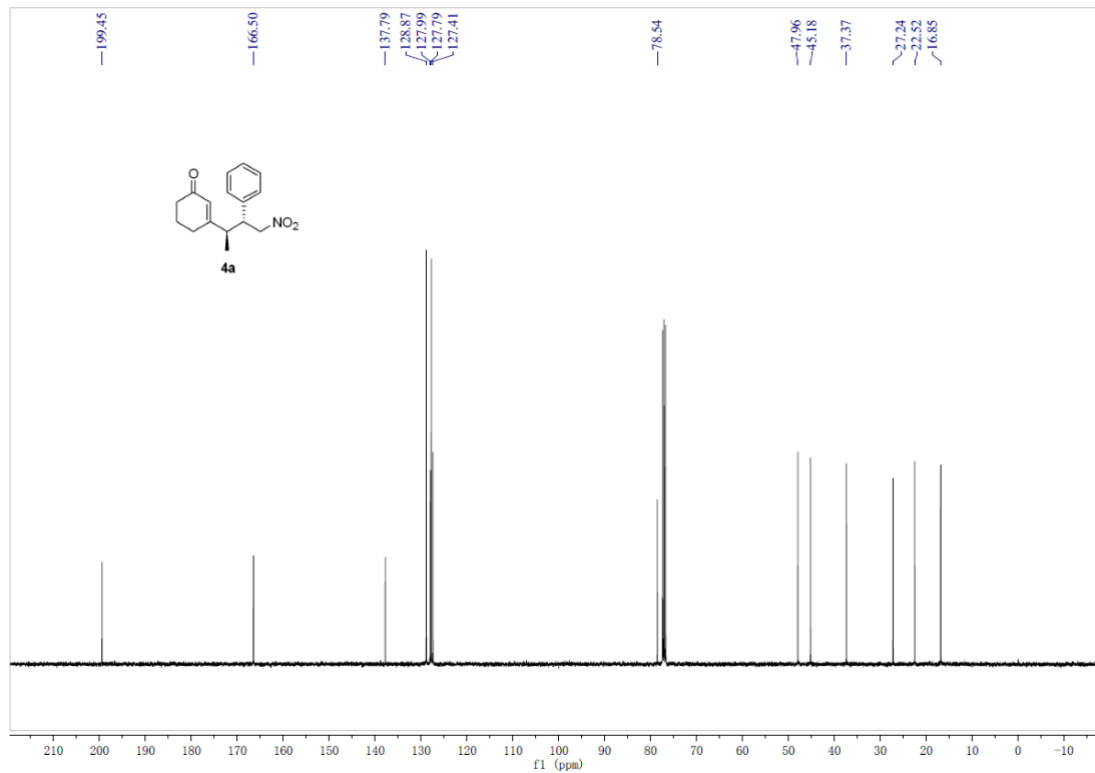

**4b: 3-((2R,3R)-4-nitro-3-(p-tolyl)butan-2-yl)cyclohex-2-en-1-one**

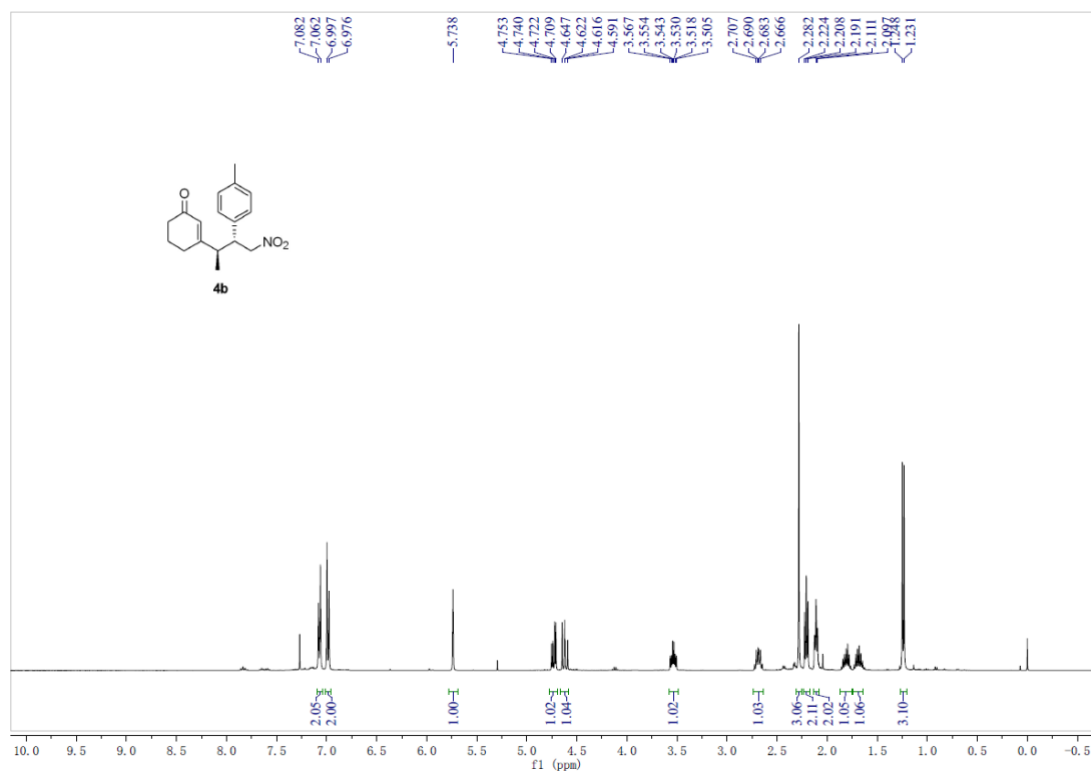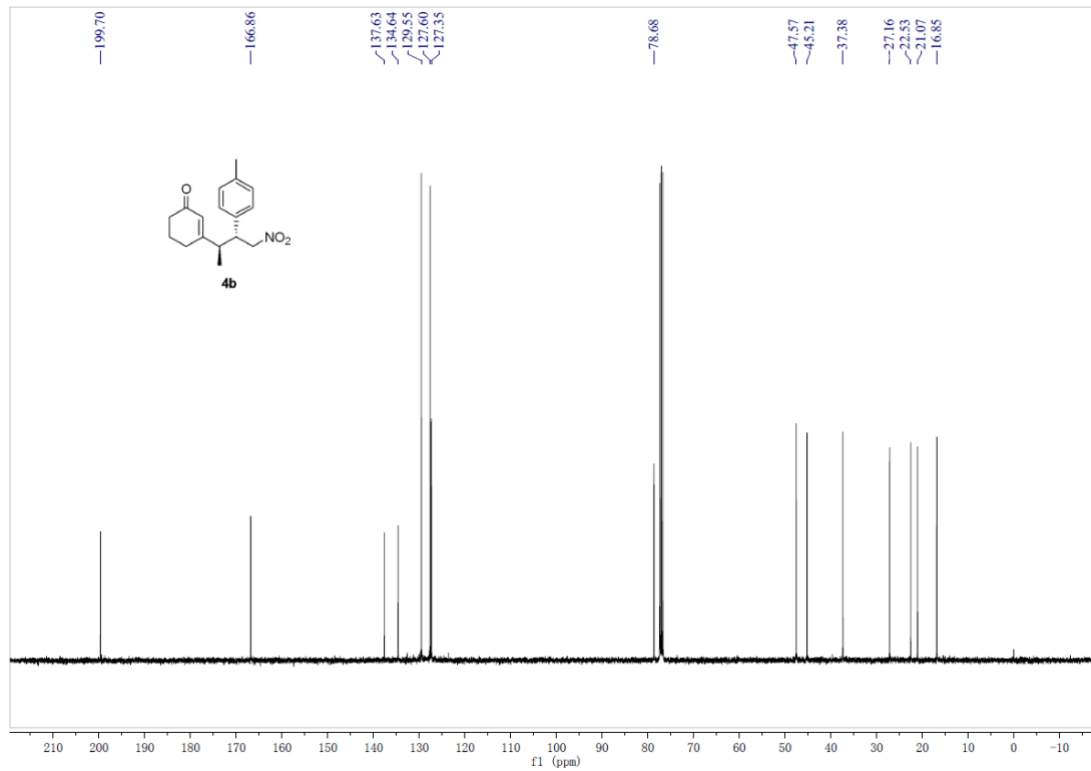

**4c: 3-((2*R*,3*R*)-3-(4-methoxyphenyl)-4-nitrobutan-2-yl)cyclohex-2-en-1-one**

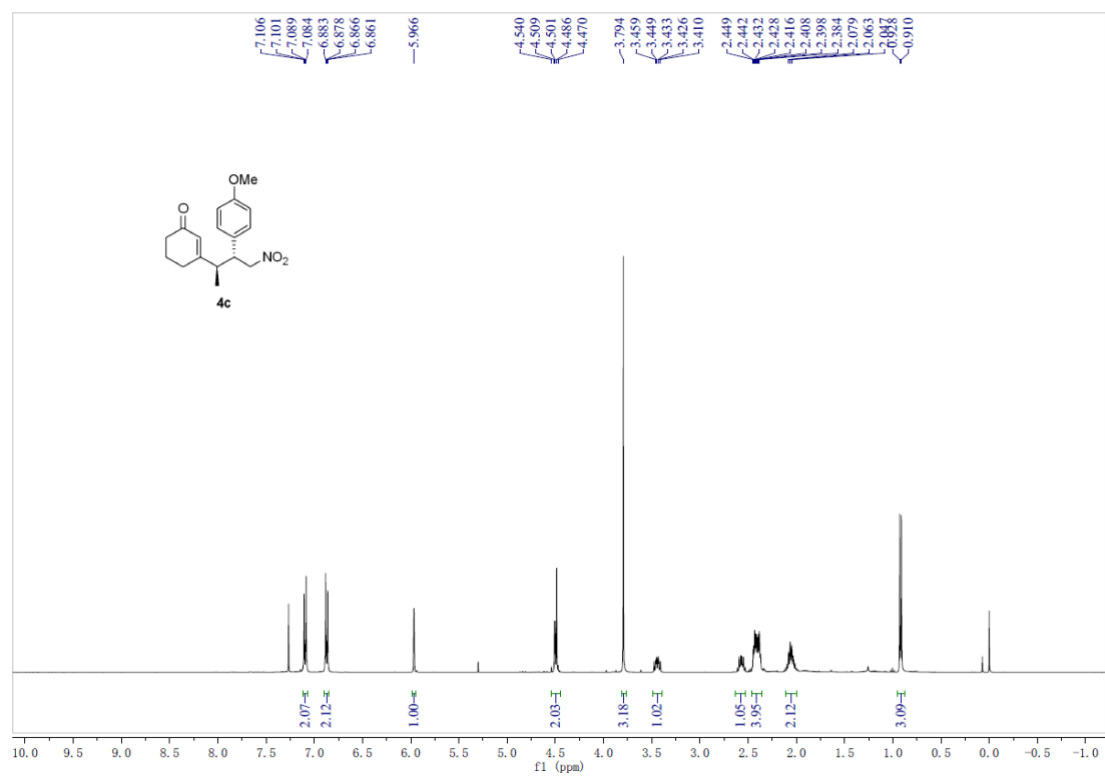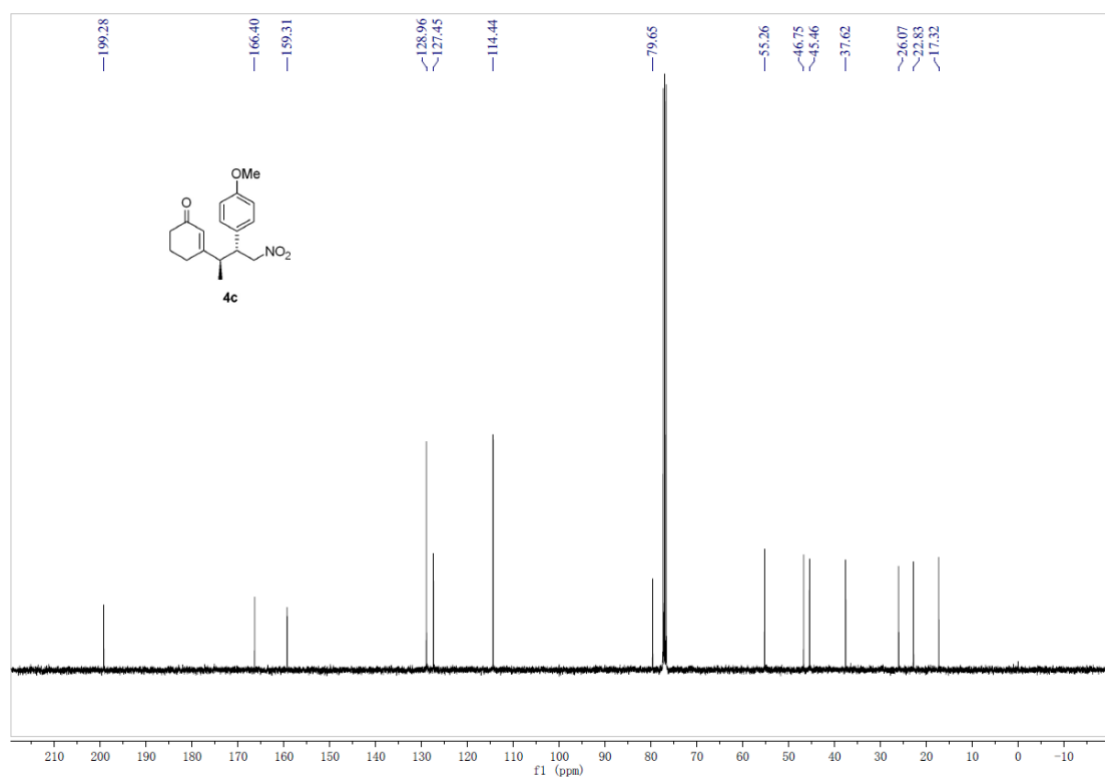

**4d: 3-((2R,3R)-3-(4-fluorophenyl)-4-nitrobutan-2-yl)cyclohex-2-en-1-one**

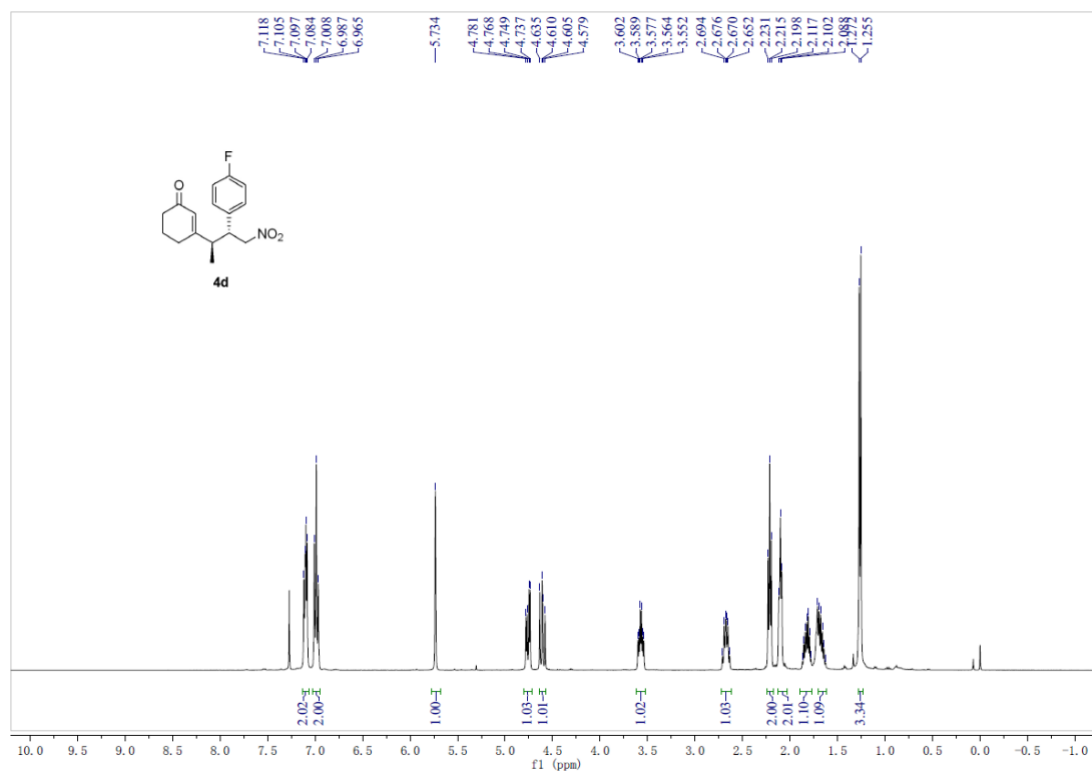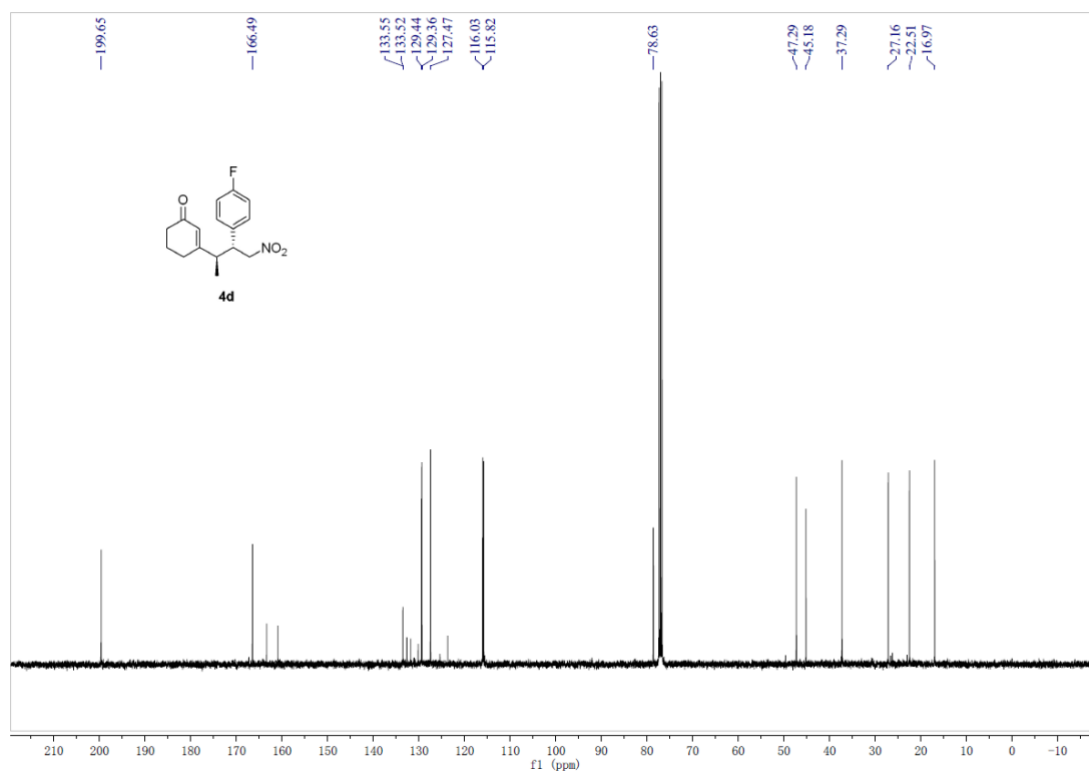

**4e: 3-((2*R*,3*R*)-3-(4-chlorophenyl)-4-nitrobutan-2-yl)cyclohex-2-en-1-one**

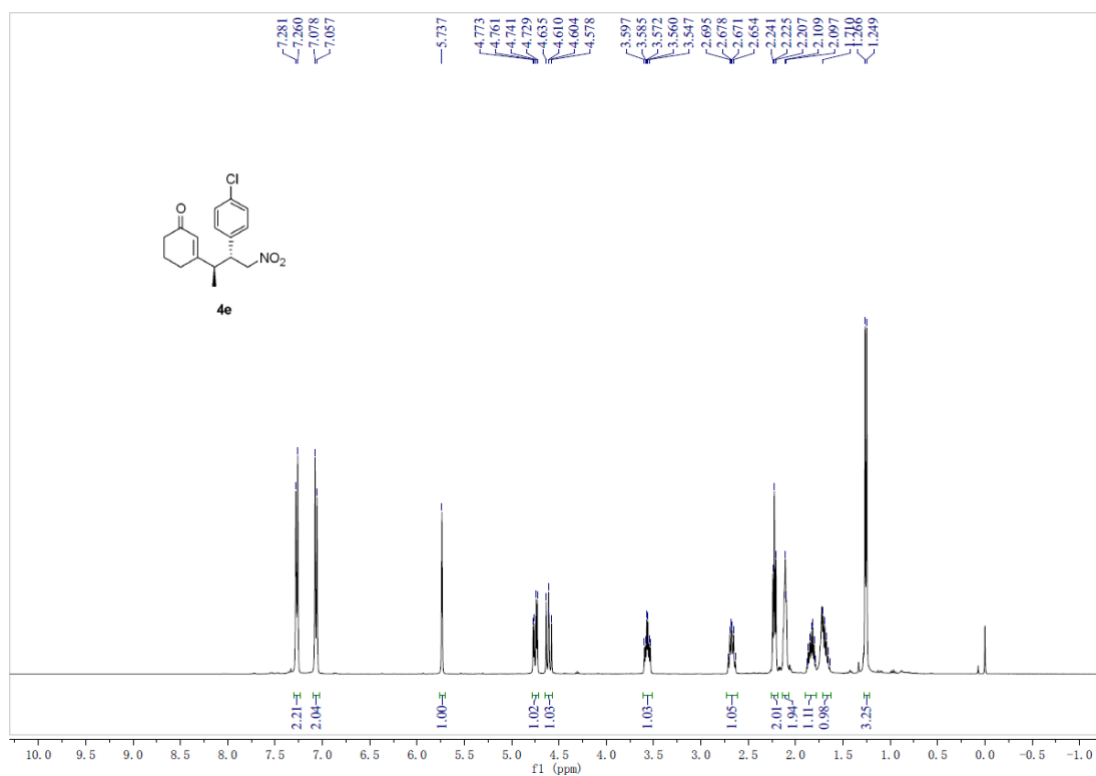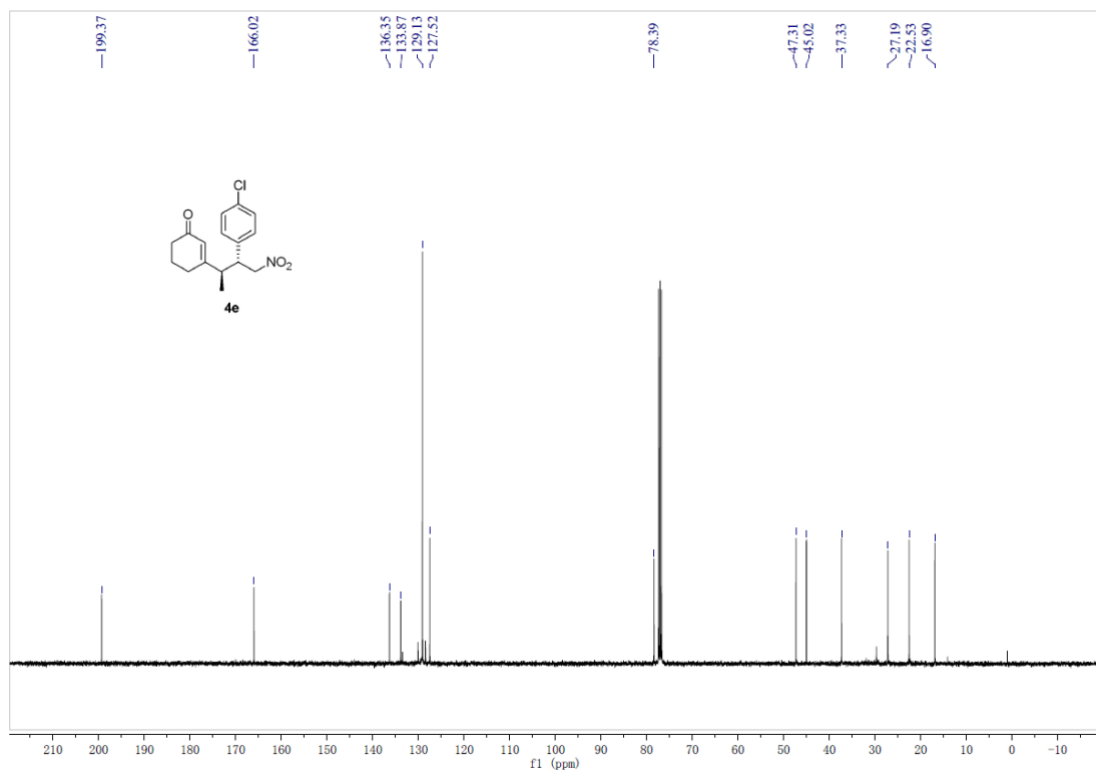

**4f: 3-((2*R*,3*R*)-3-(4-bromophenyl)-4-nitrobutan-2-yl)cyclohex-2-en-1-one**

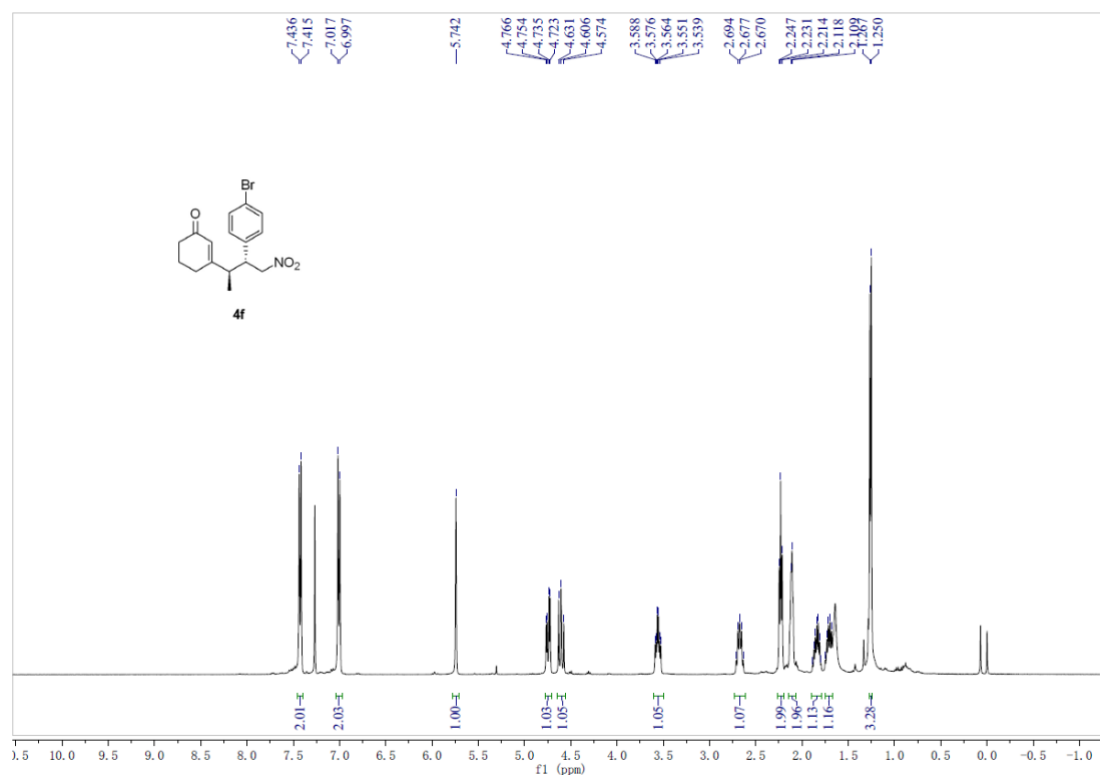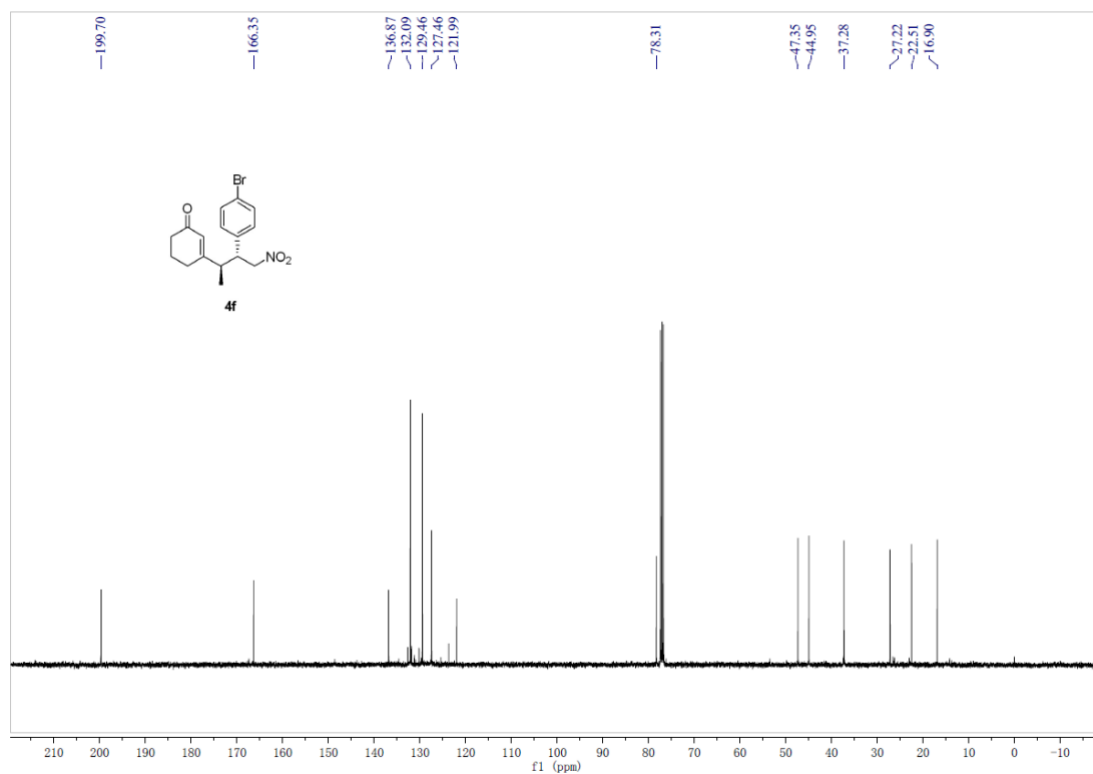

**4g: 3-((2*R*,3*R*)-4-nitro-3-(3-nitrophenyl)butan-2-yl)cyclohex-2-en-1-one**

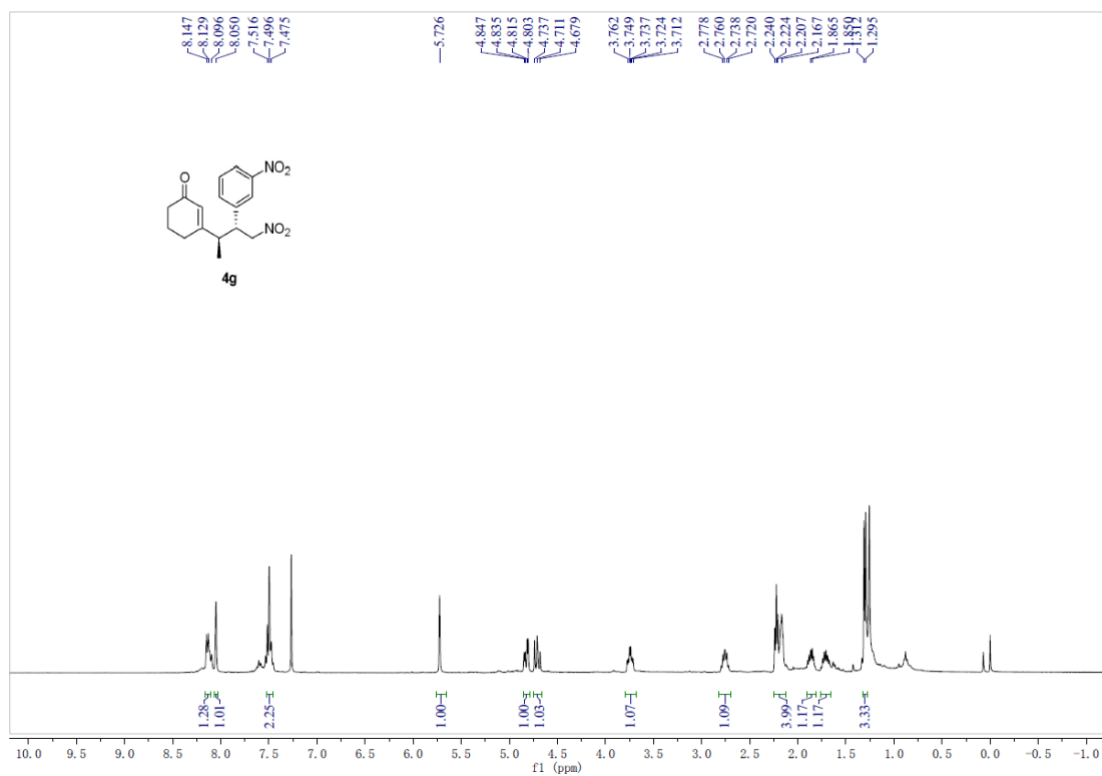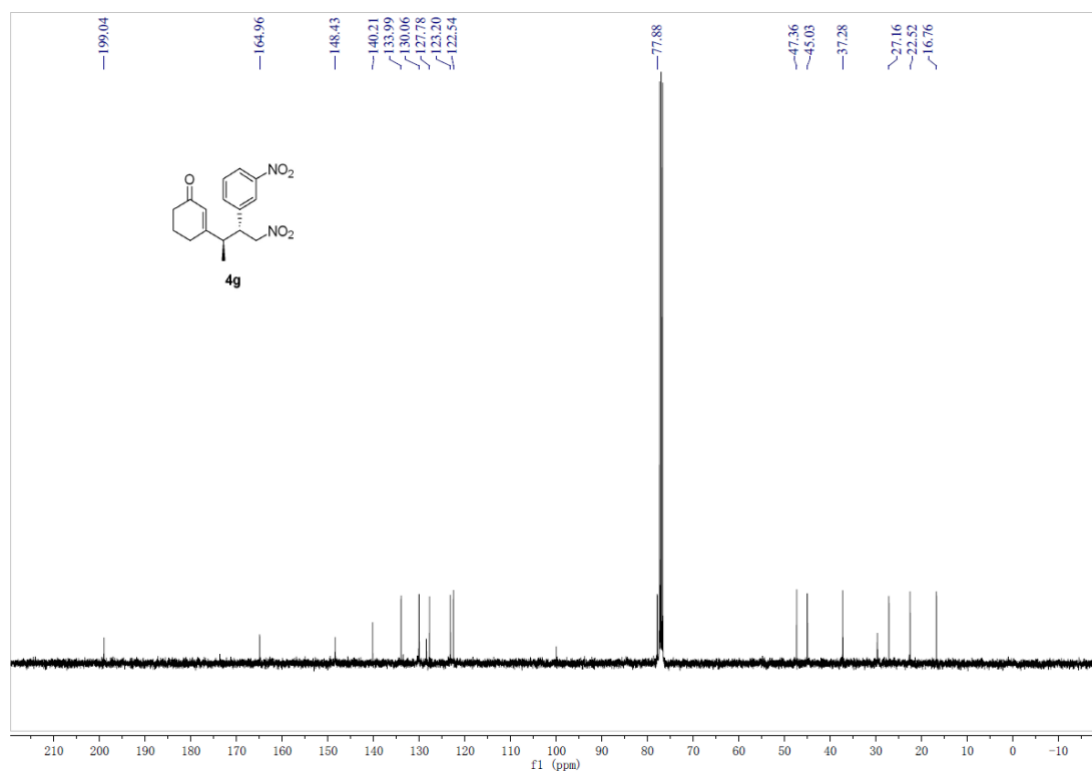



**4h: 3-((2R,3R)-3-(naphthalen-2-yl)-4-nitrobutan-2-yl)cyclohex-2-en-1-one**

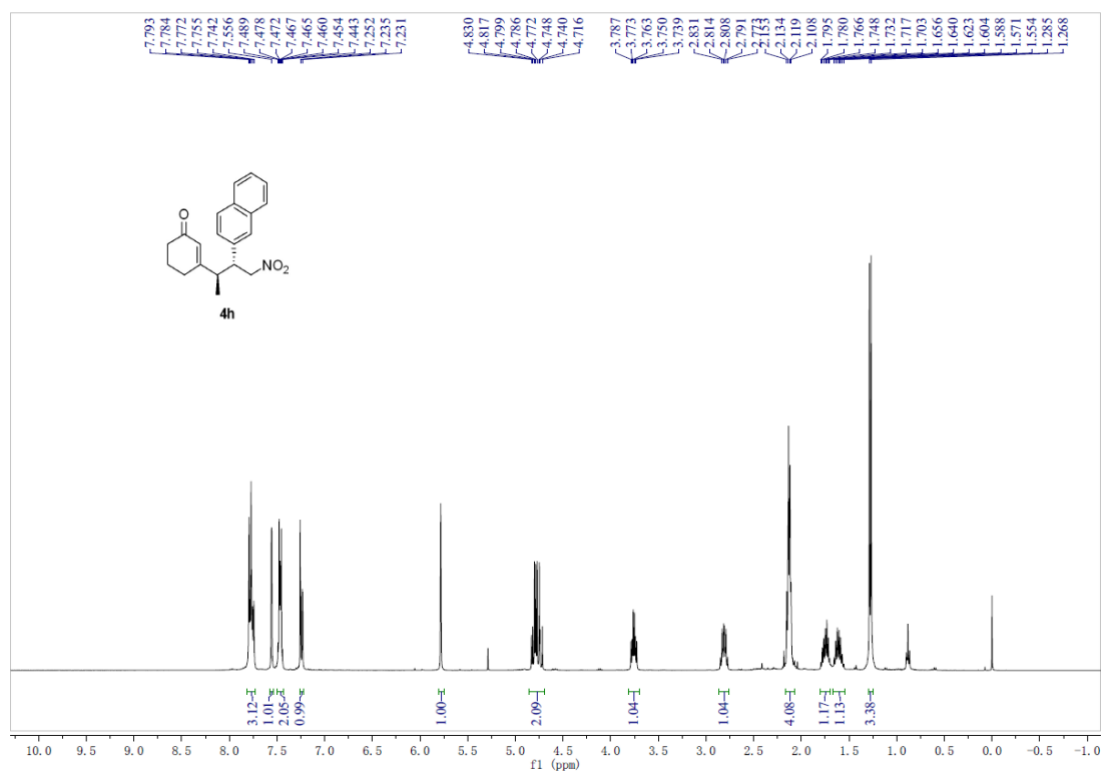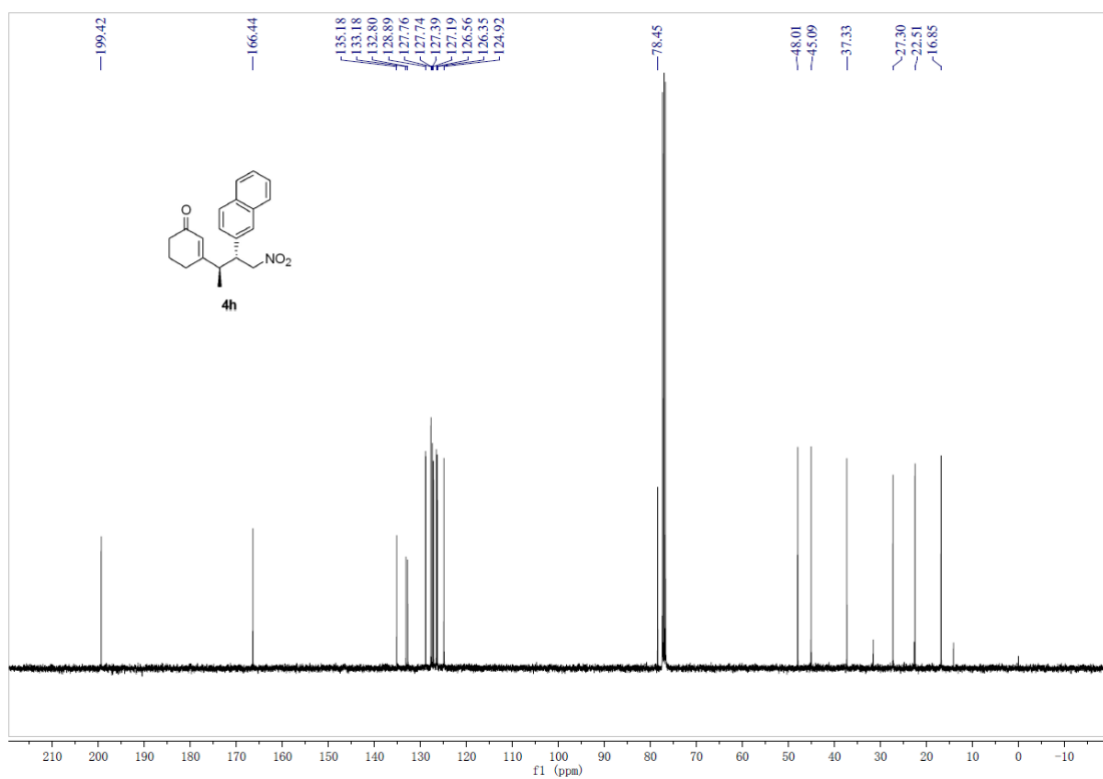

**4i: 3-((2*R*,3*S*)-3-(furan-2-yl)-4-nitrobutan-2-yl)cyclohex-2-en-1-one**

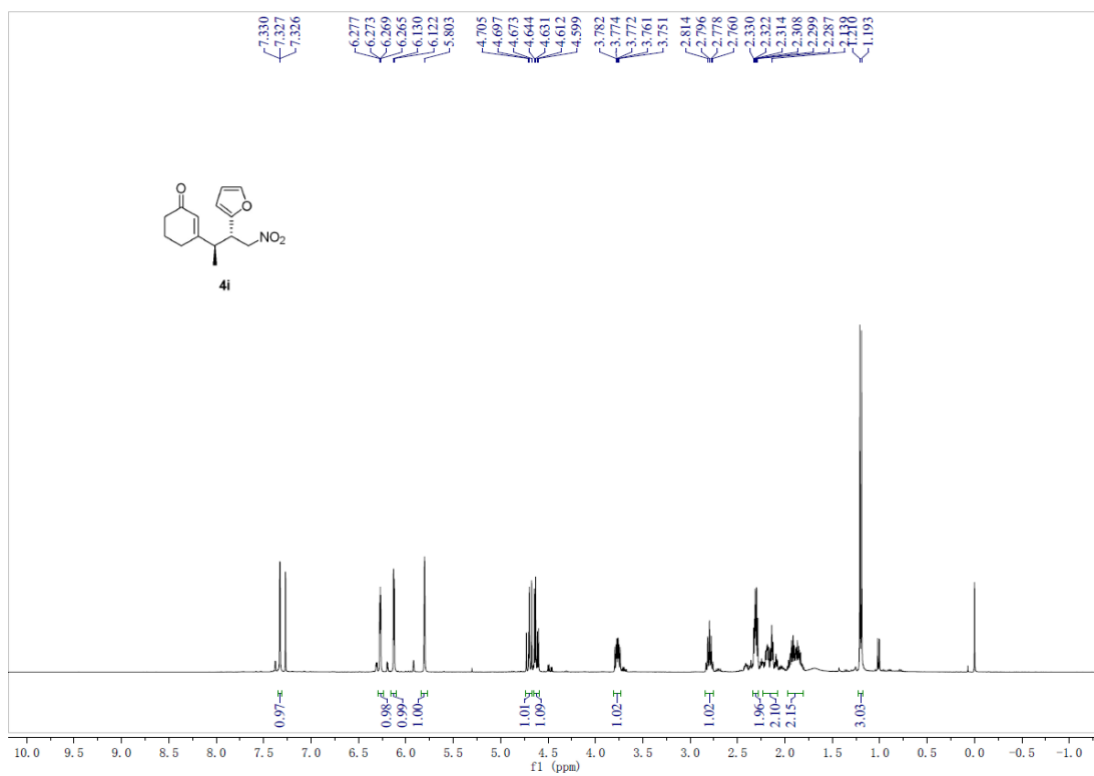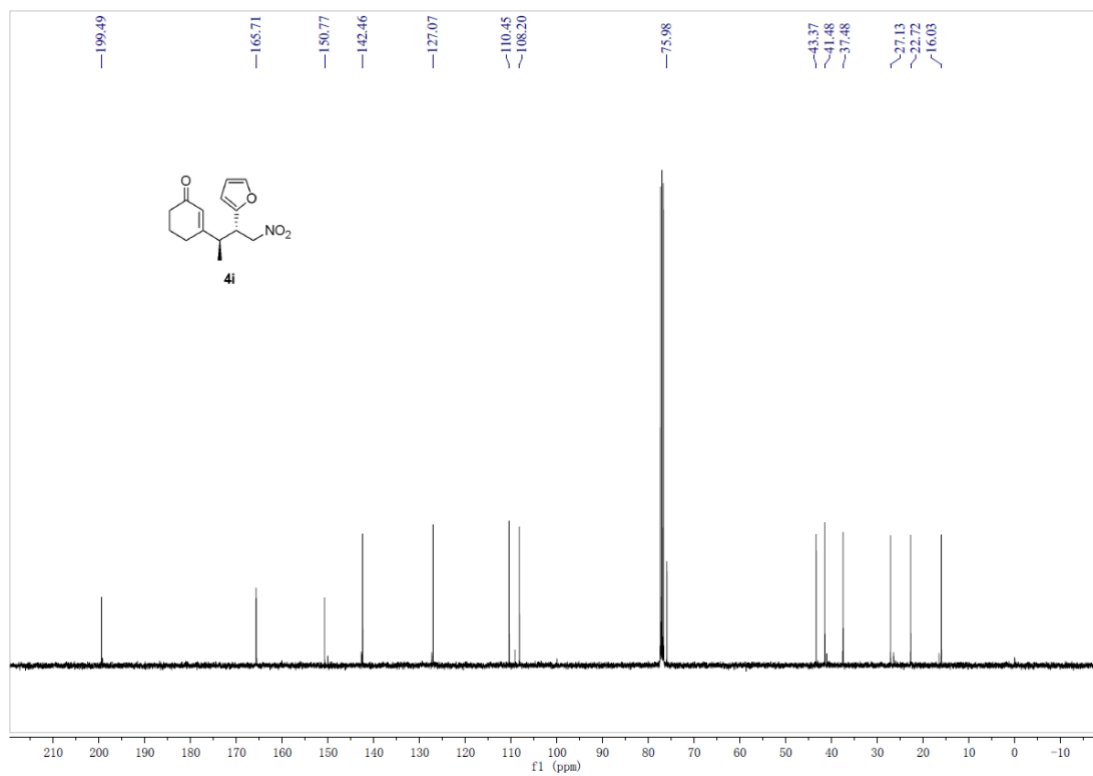

4j:3-((2R,3R)-1-nitro-2-phenylpentan-3-yl)cyclohex-2-en-1-one

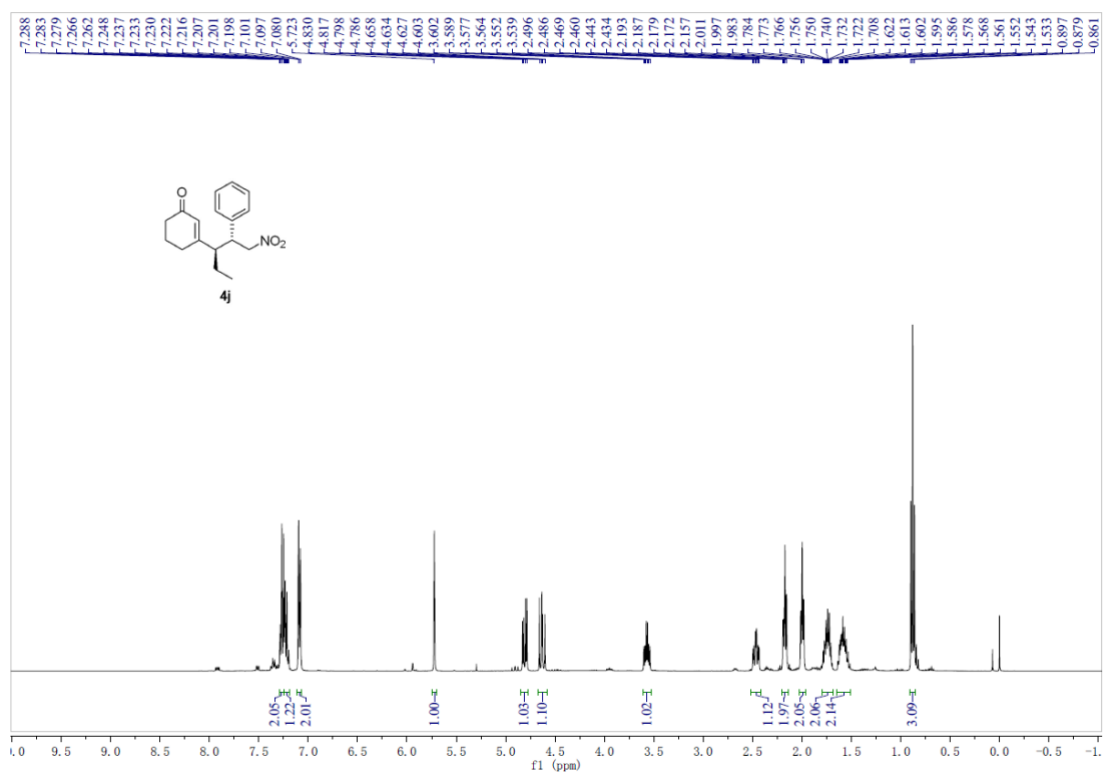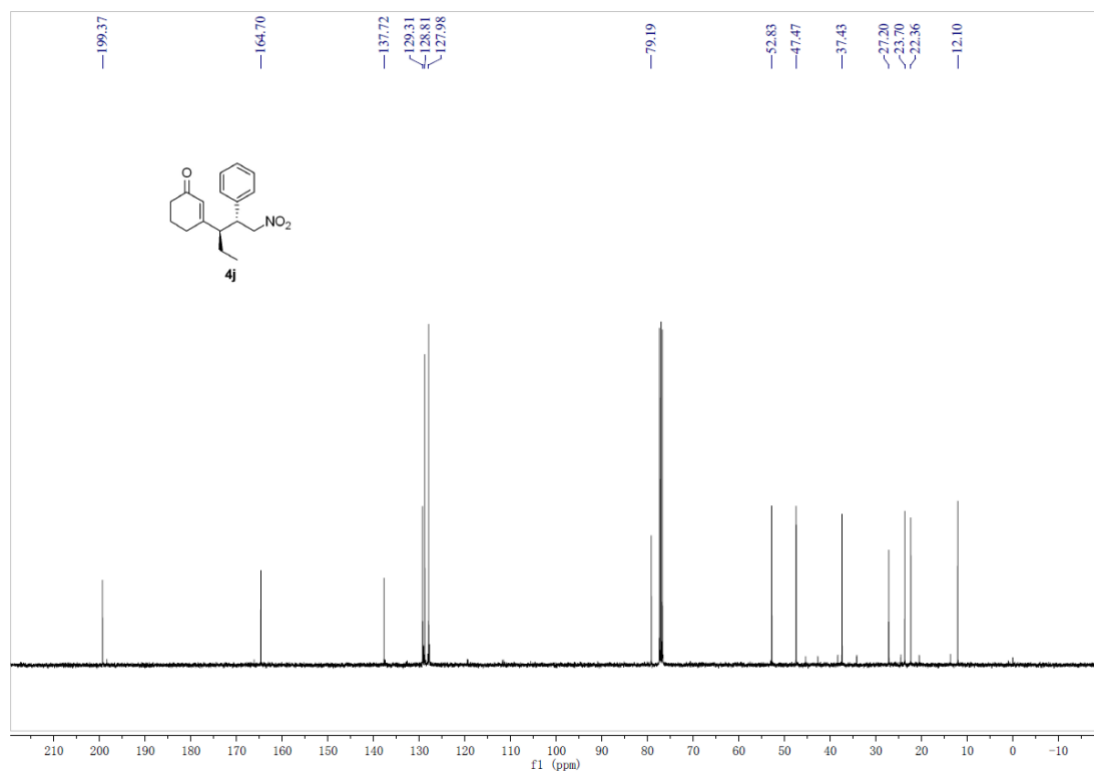

**4k: 3-((2R,3R)-1-nitro-2-phenylhexan-3-yl)cyclohex-2-en-1-one**

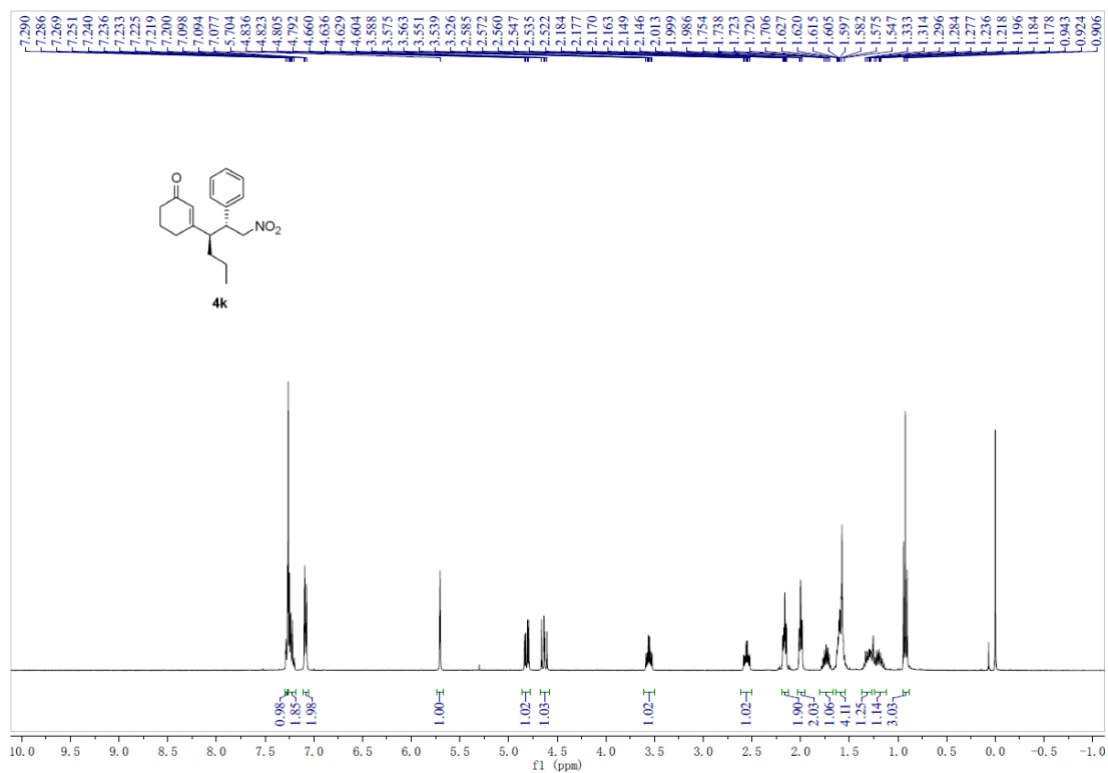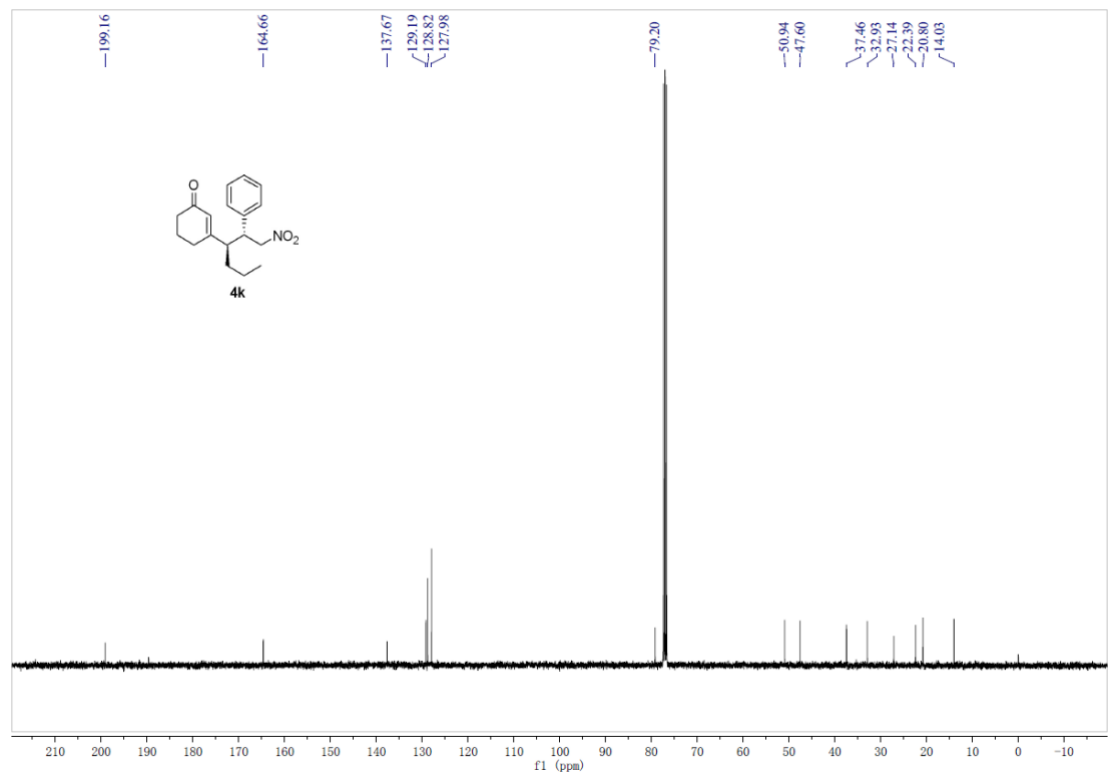

**4l: 3-((2*R*,3*R*)-1-nitro-2-phenylheptan-3-yl)cyclohex-2-en-1-one**

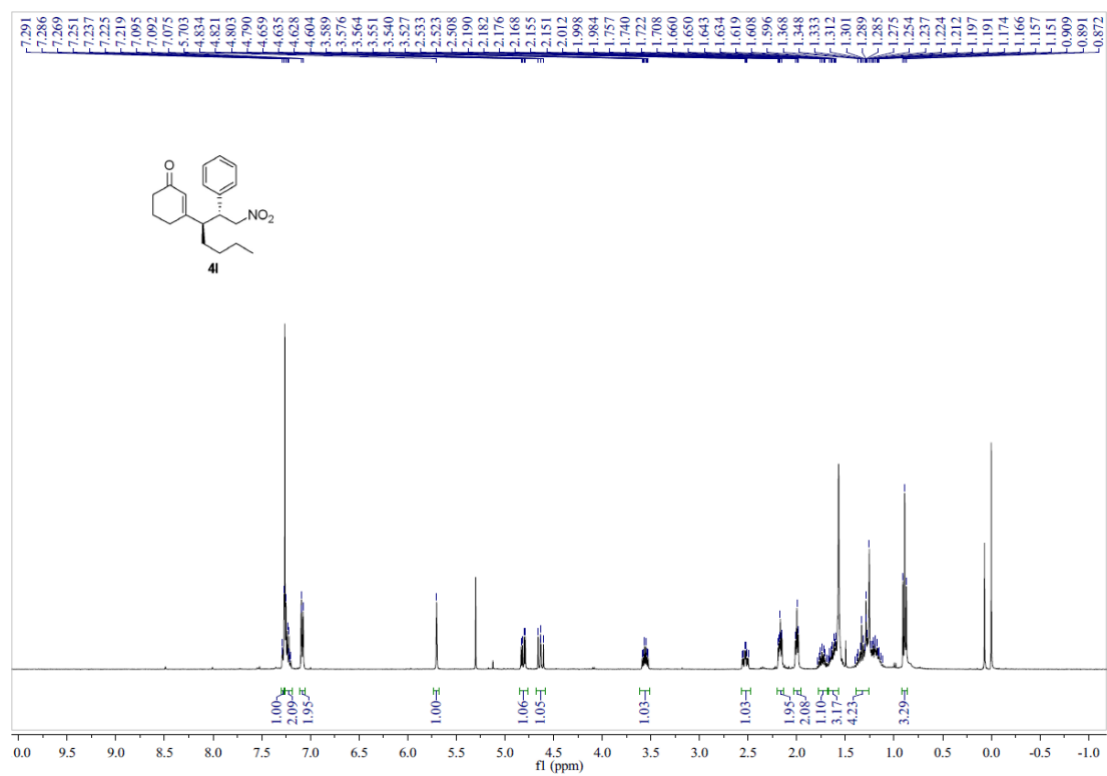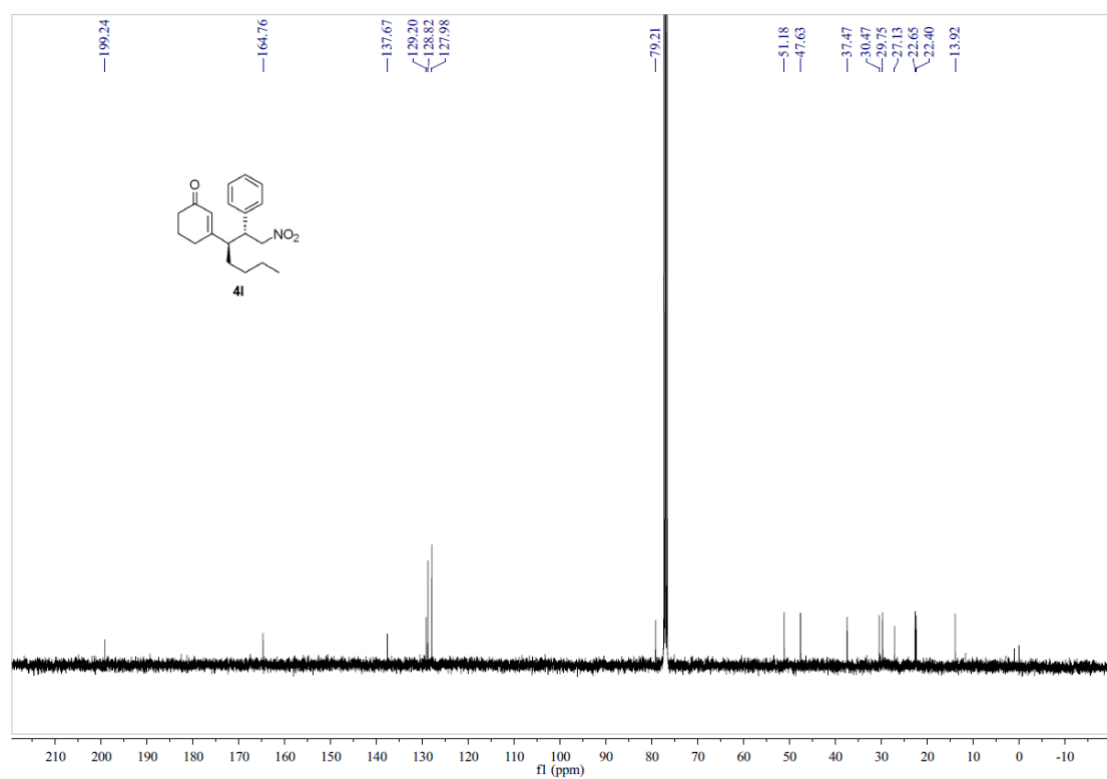

**4m: 3-((2R,3R)-1-nitro-2-phenyloctan-3-yl)cyclohex-2-en-1-one**

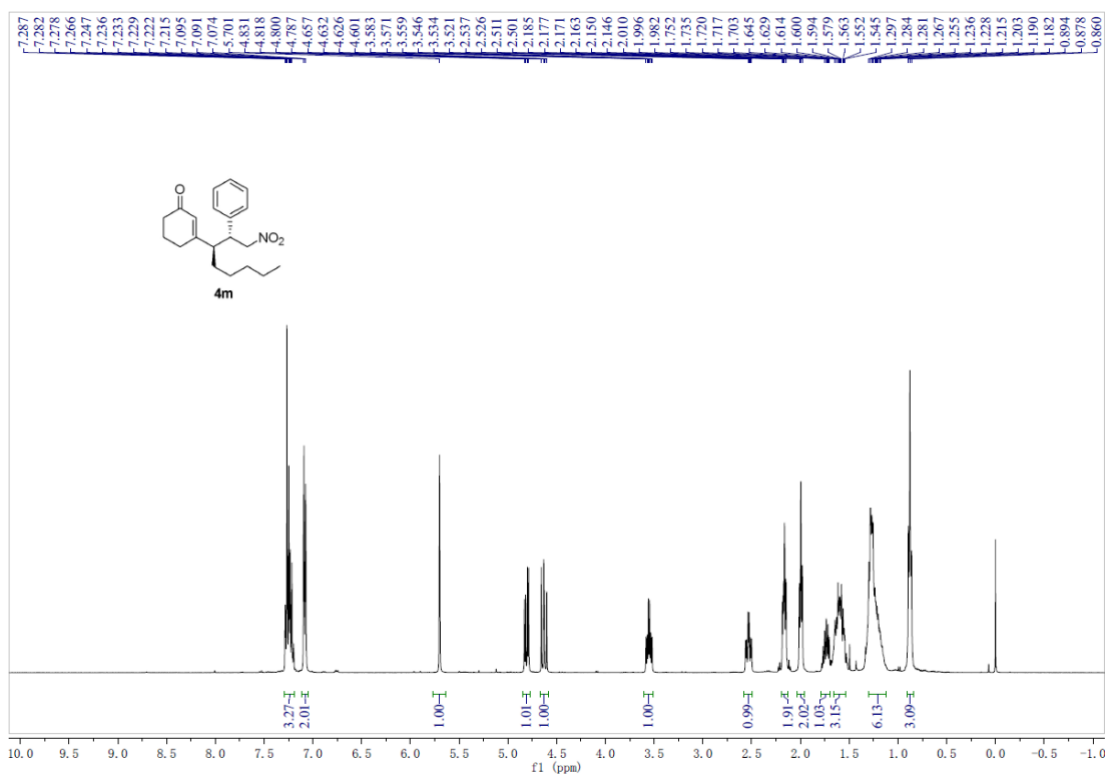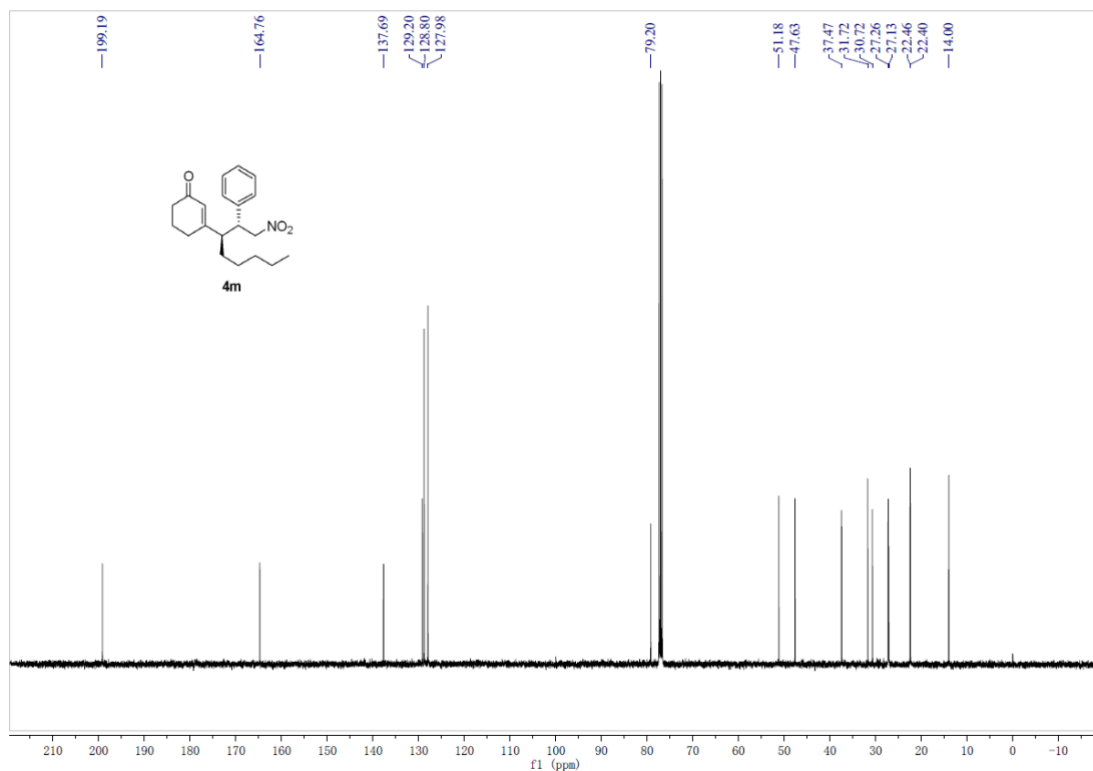

**4n: 3-((1R,2R)-3-nitro-1,2-diphenylpropyl)cyclohex-2-en-1-one**

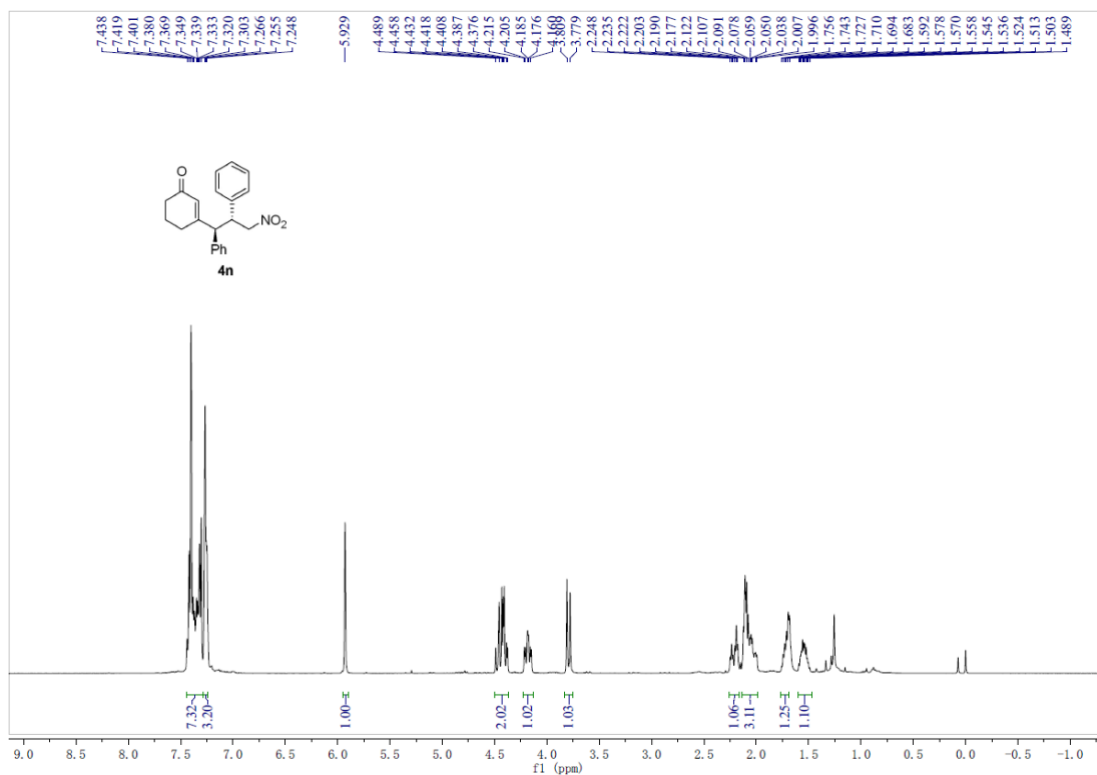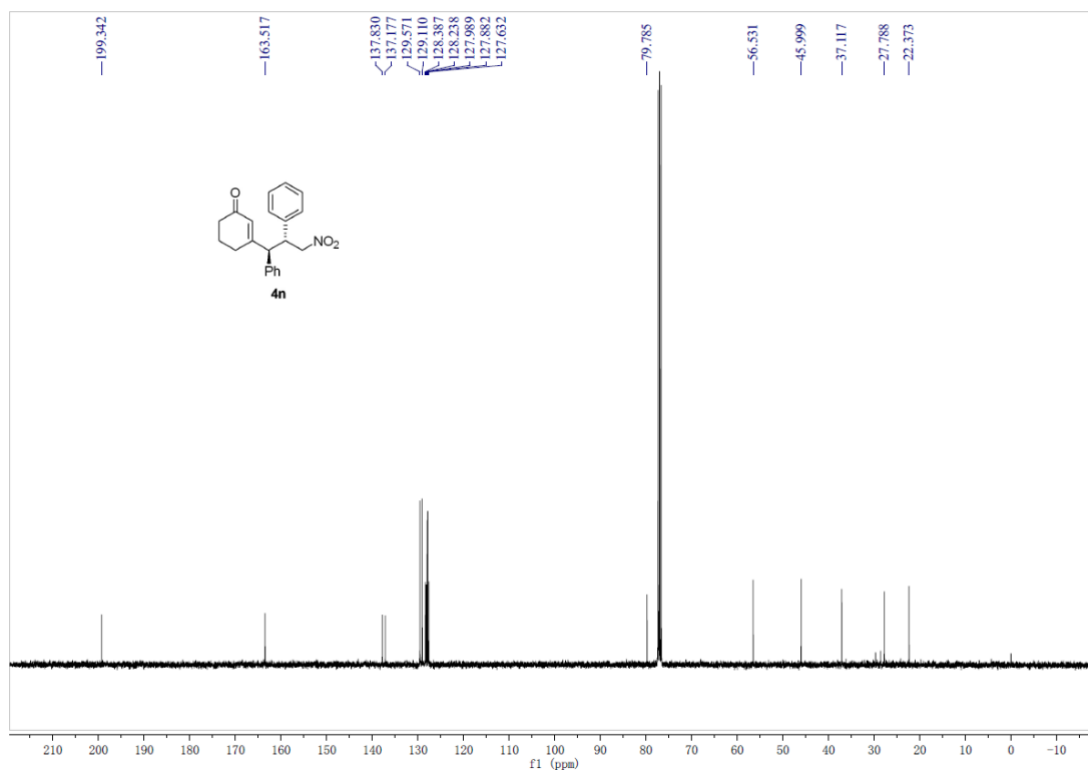

**4o: 3-((2*R*,3*R*)-4-nitro-1,3-diphenylbutan-2-yl)cyclohex-2-en-1-one**

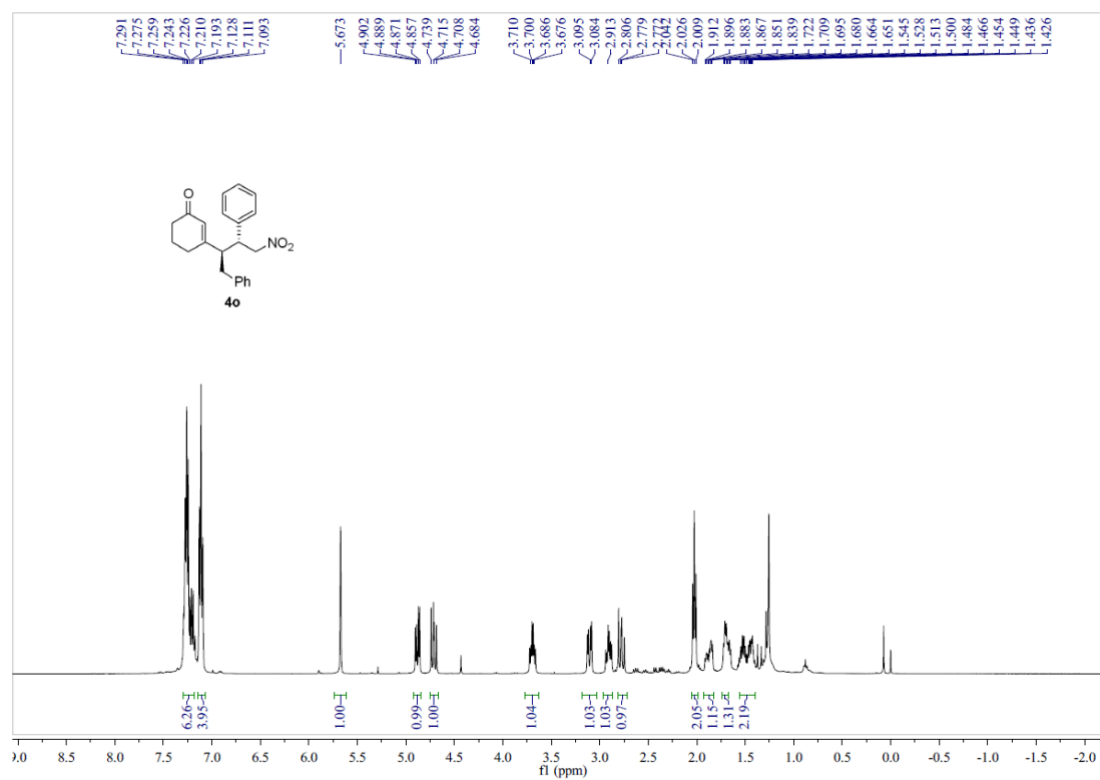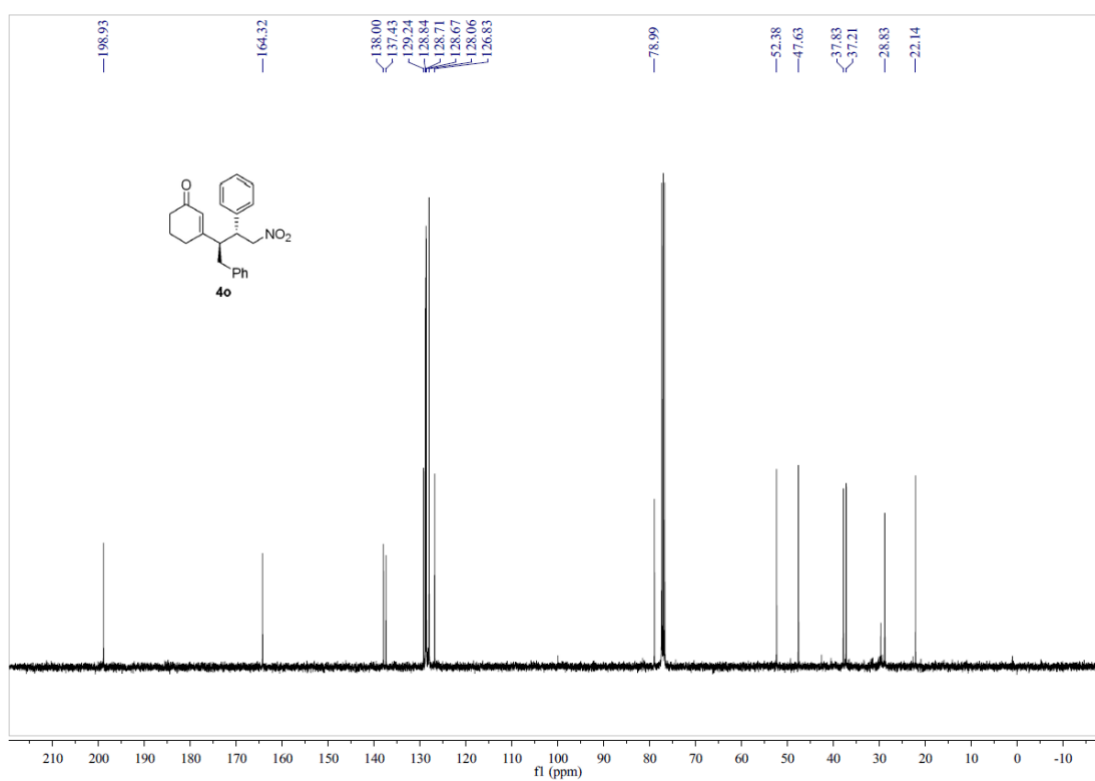



**4p: 3-((2R,3R)-2-(4-bromophenyl)-1-nitrohexan-3-yl)cyclohex-2-en-1-one**

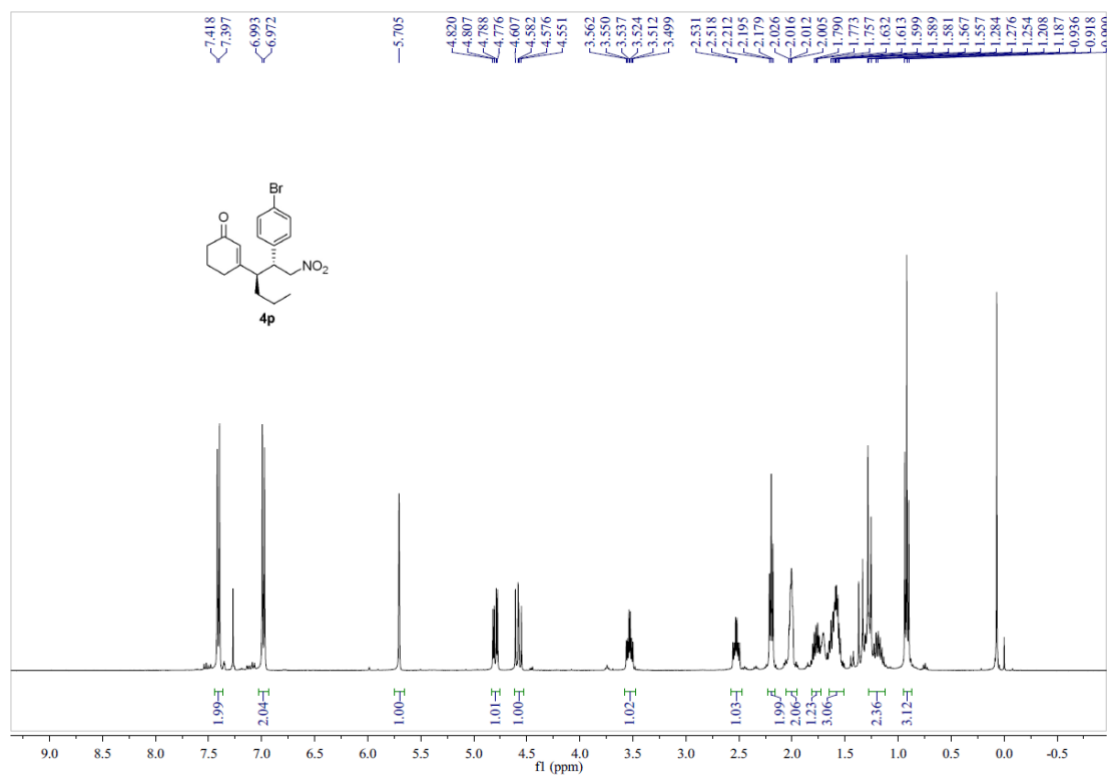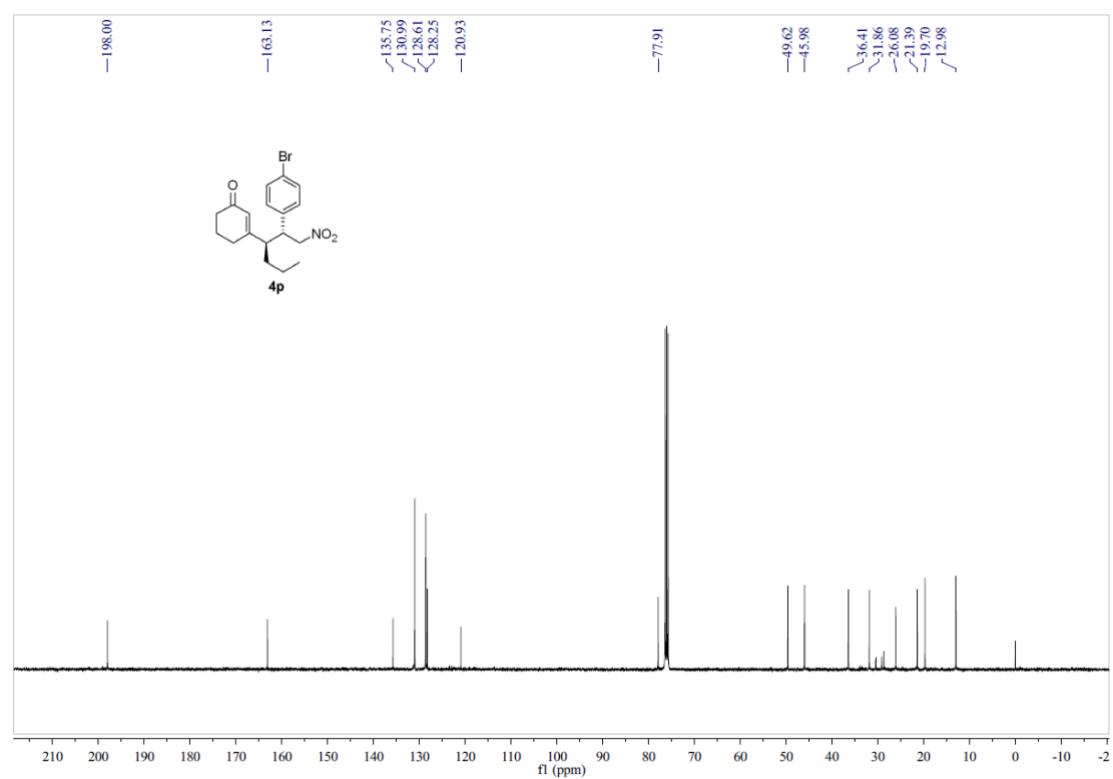

**5a: 3-((2*S*,3*R*)-4-nitro-3-phenylbutan-2-yl)cyclohex-2-en-1-one**

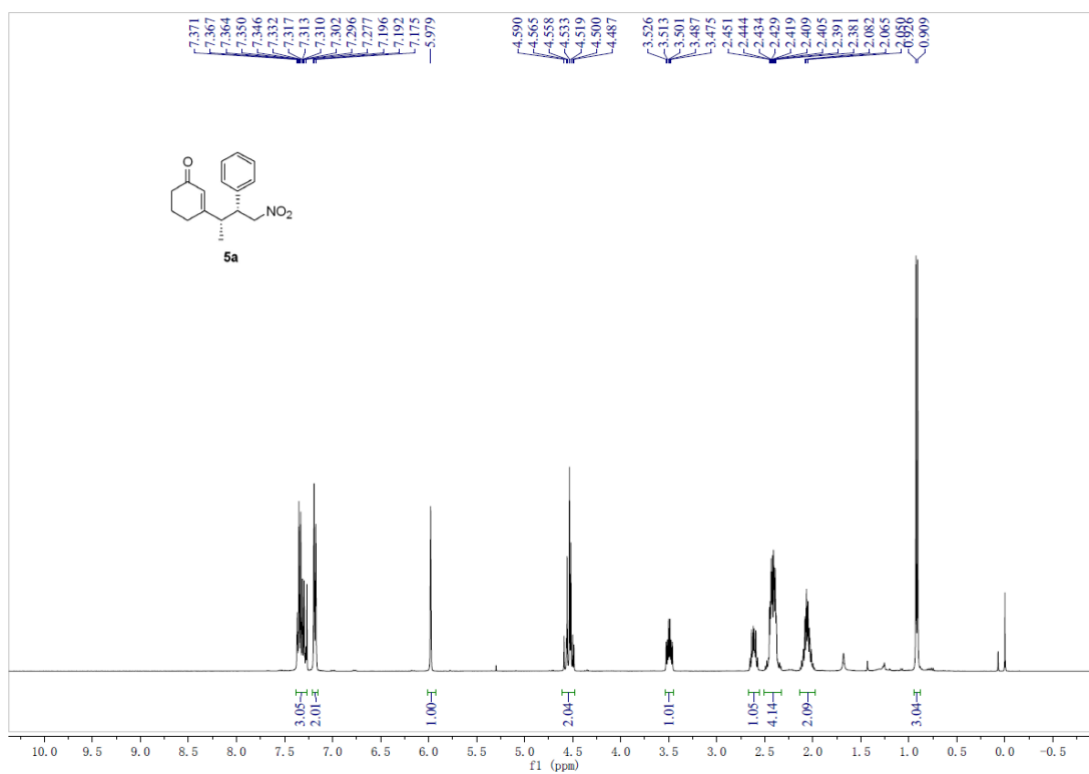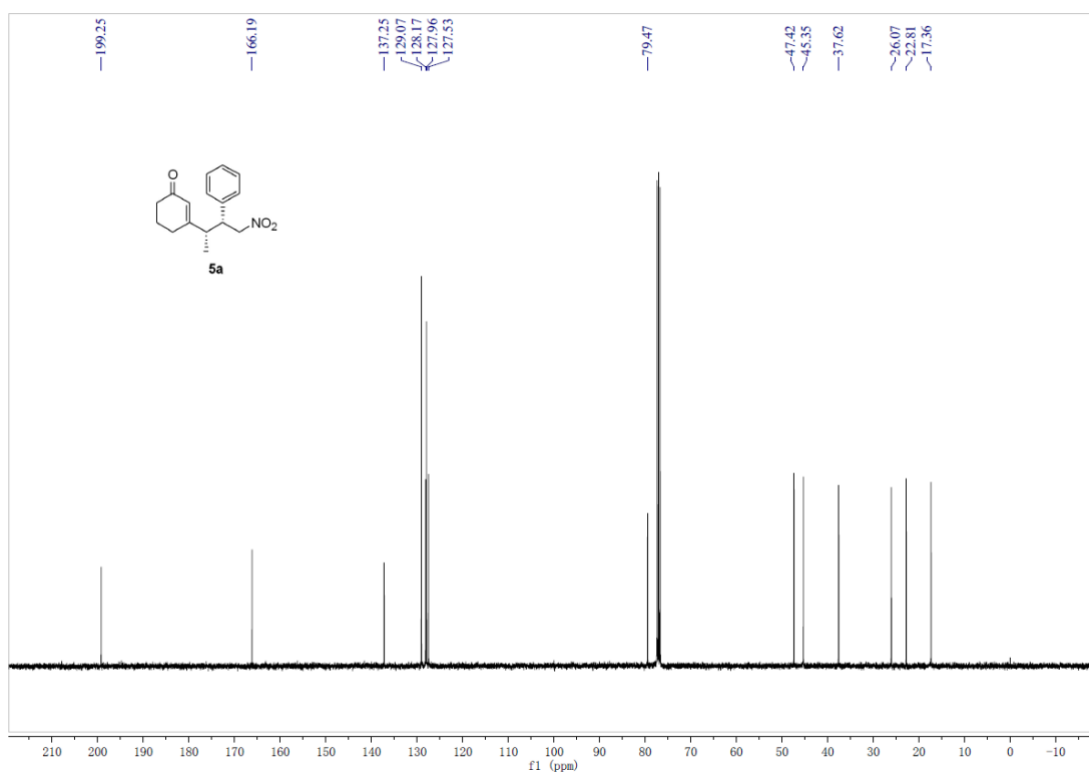

**5b: 3-((2*S*,3*R*)-4-nitro-3-(*p*-tolyl)butan-2-yl)cyclohex-2-en-1-one**

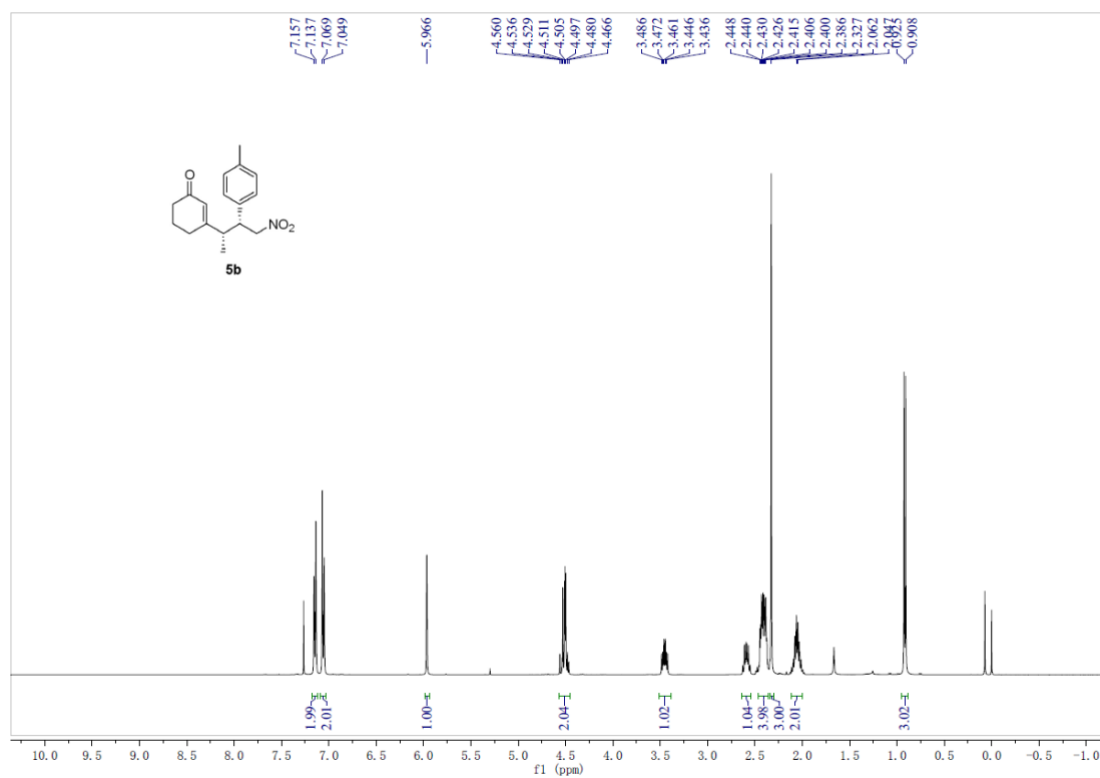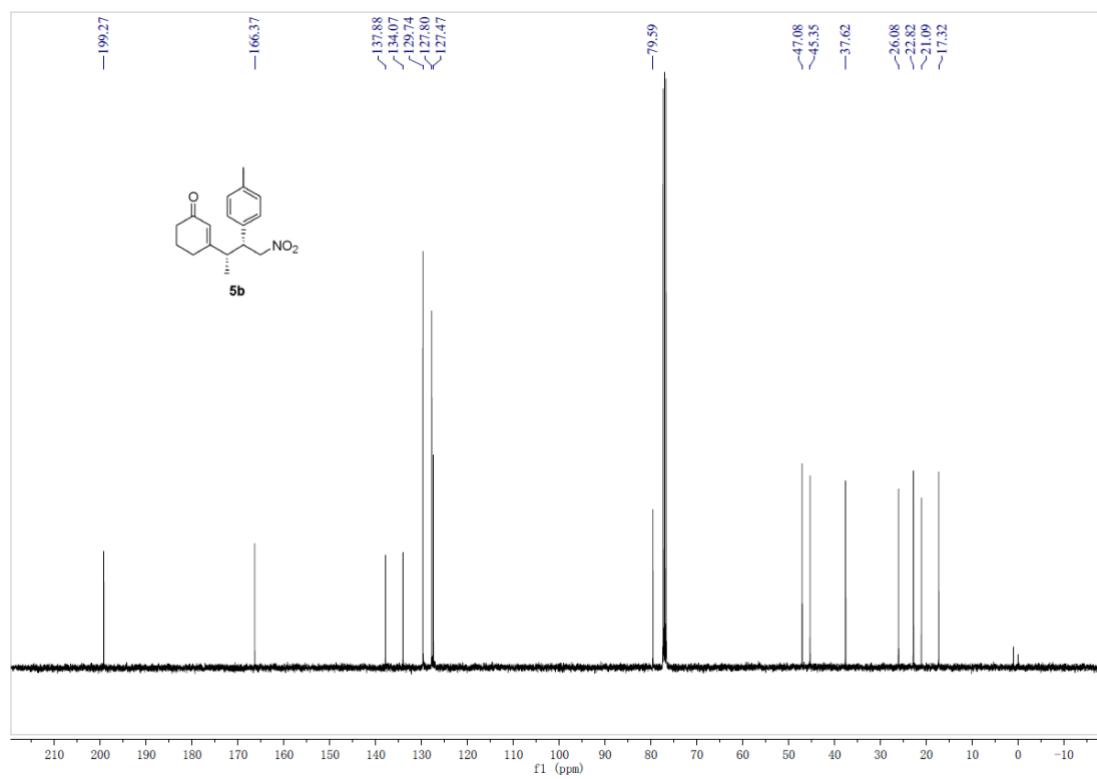

**5c: 3-((2*S*,3*R*)-3-(4-methoxyphenyl)-4-nitrobutan-2-yl)cyclohex-2-en-1-one**

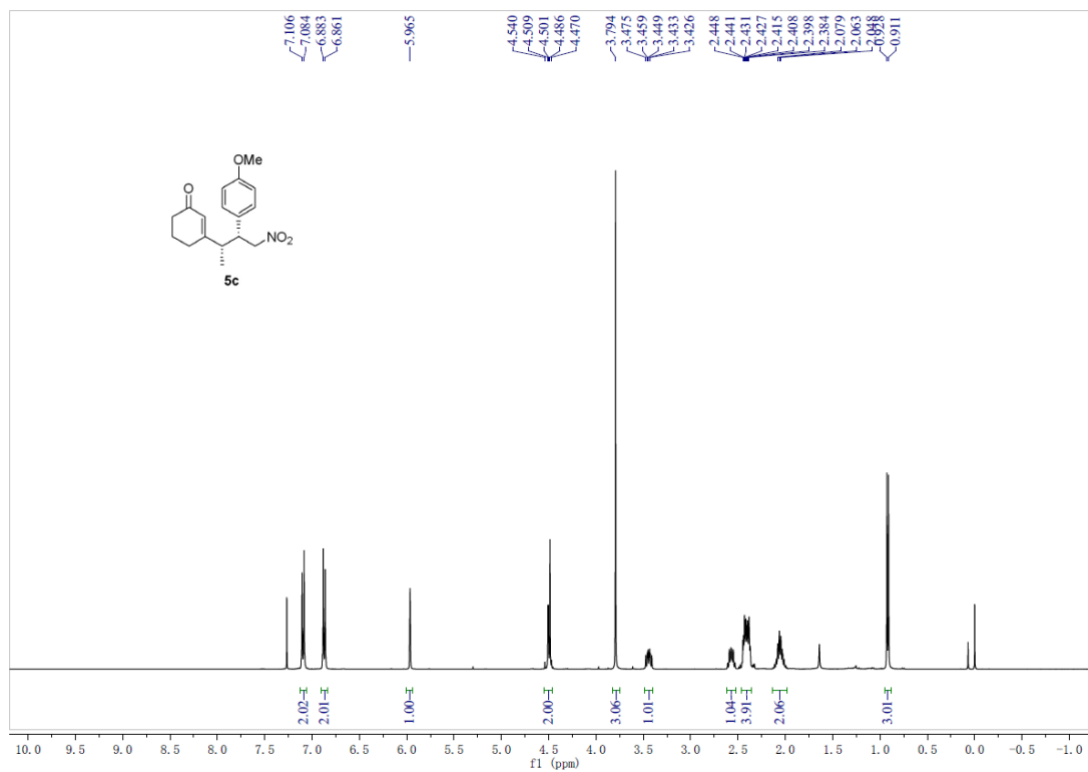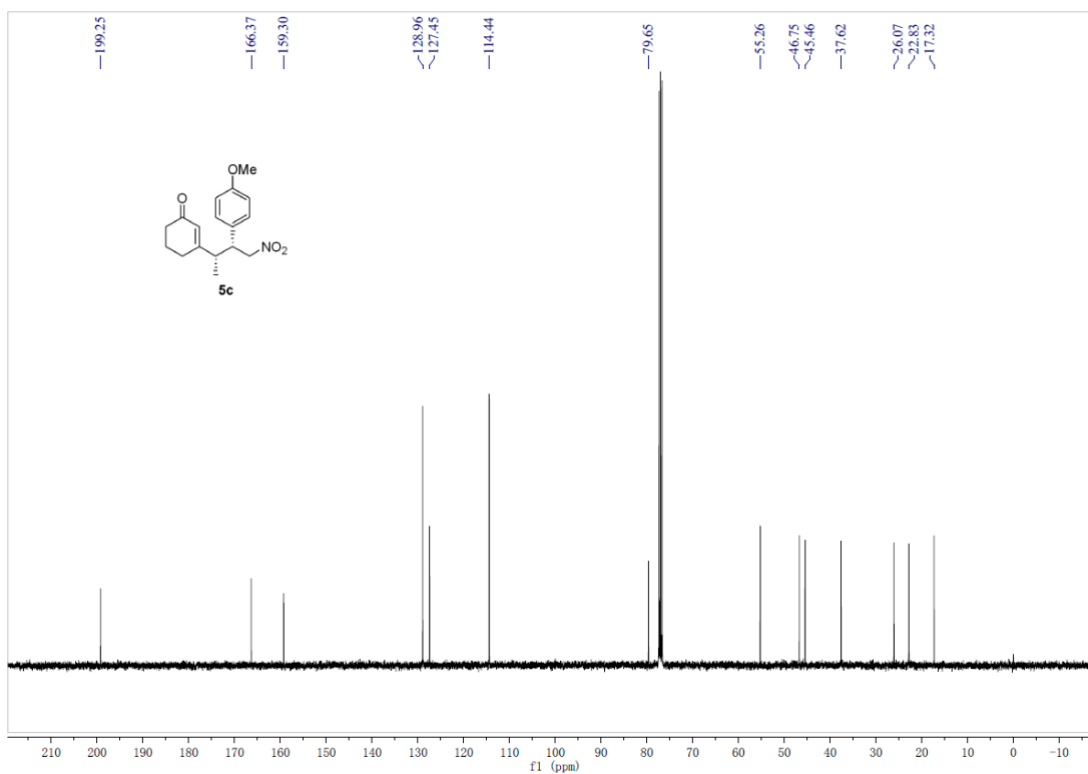

**5d: 3-((2*S*,3*R*)-3-(4-fluorophenyl)-4-nitrobutan-2-yl)cyclohex-2-en-1-one**

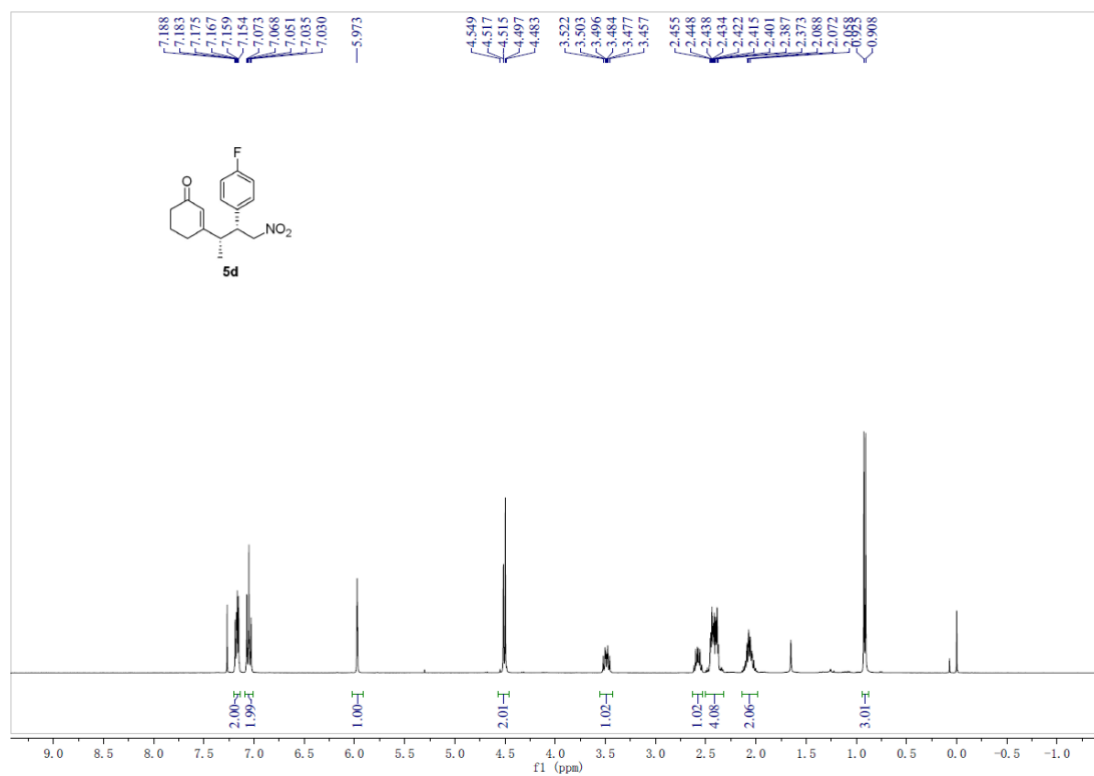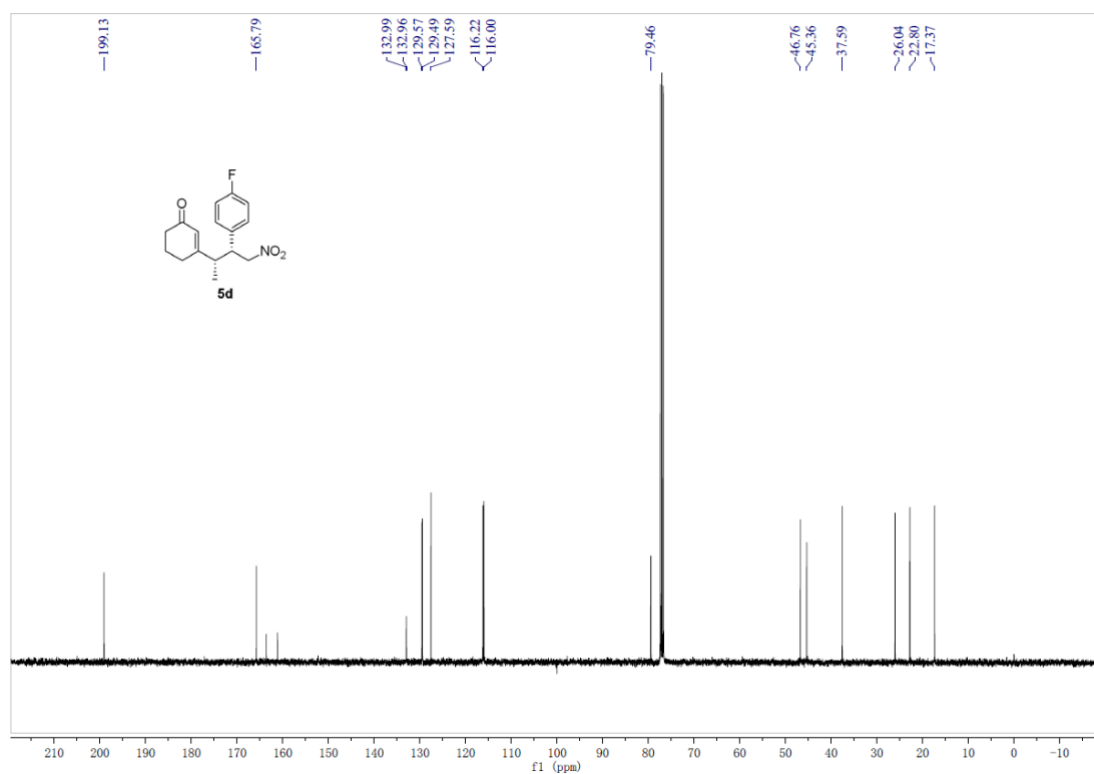

**5e: 3-((2*S*,3*R*)-3-(4-chlorophenyl)-4-nitrobutan-2-yl)cyclohex-2-en-1-one**

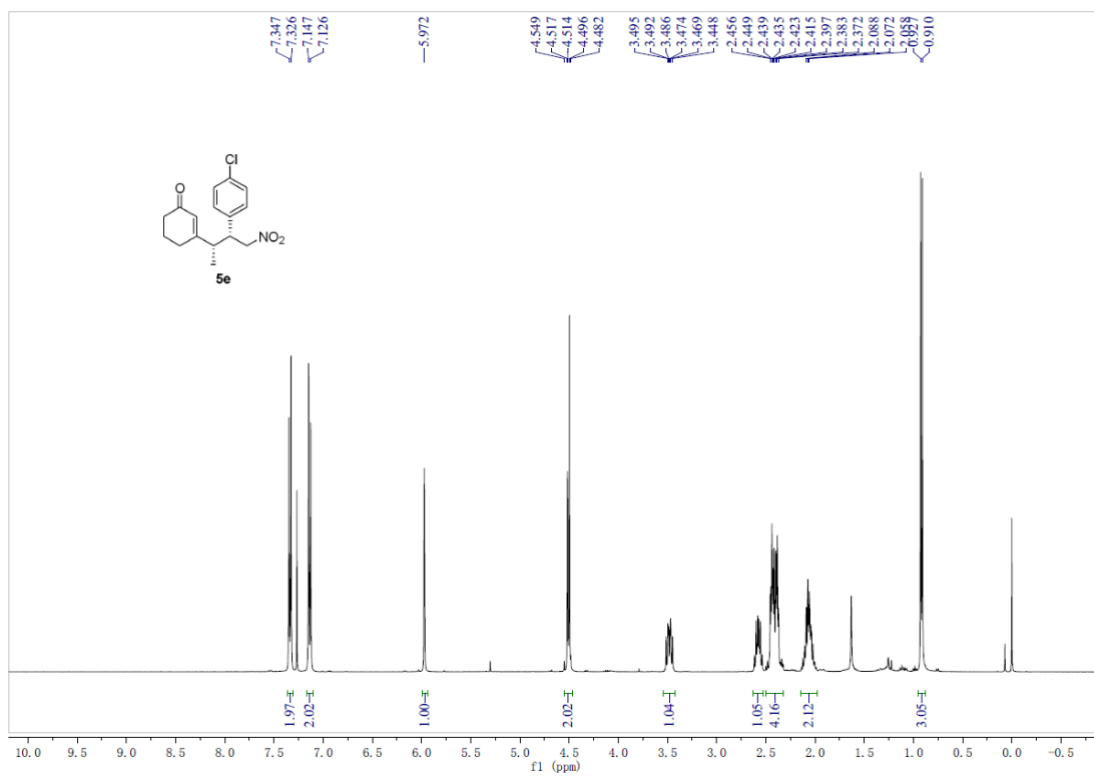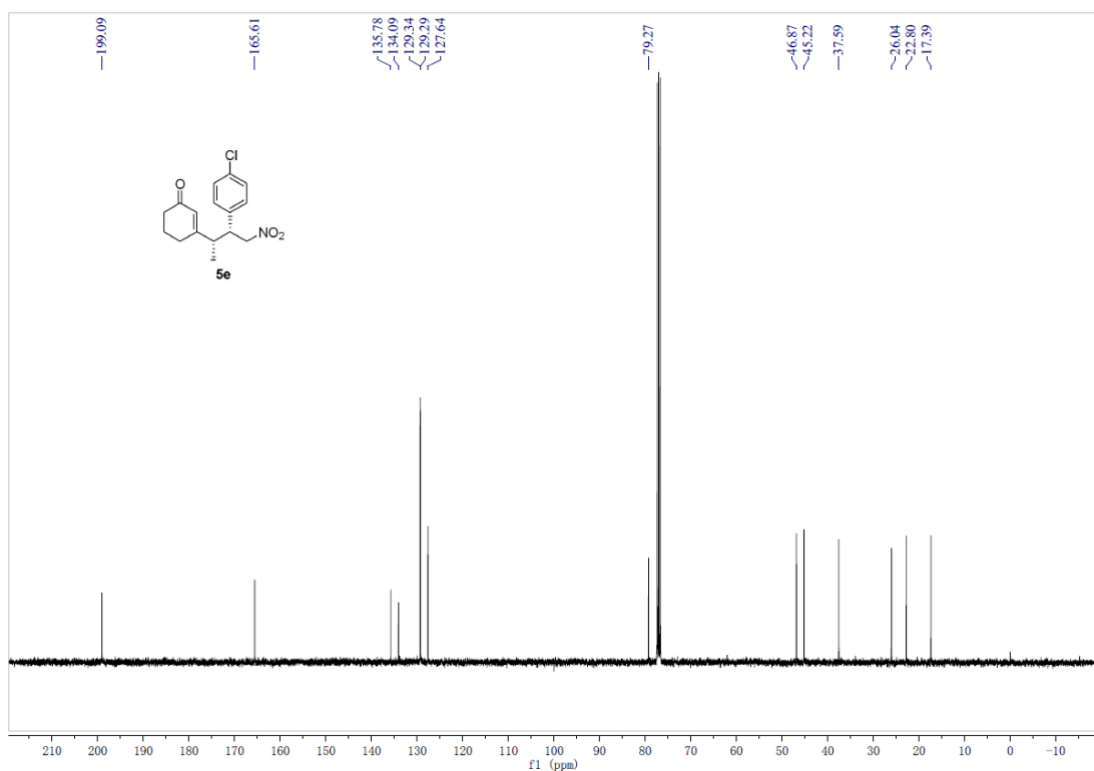

**5f: 3-((2*S*,3*R*)-3-(4-bromophenyl)-4-nitrobutan-2-yl)cyclohex-2-en-1-one**

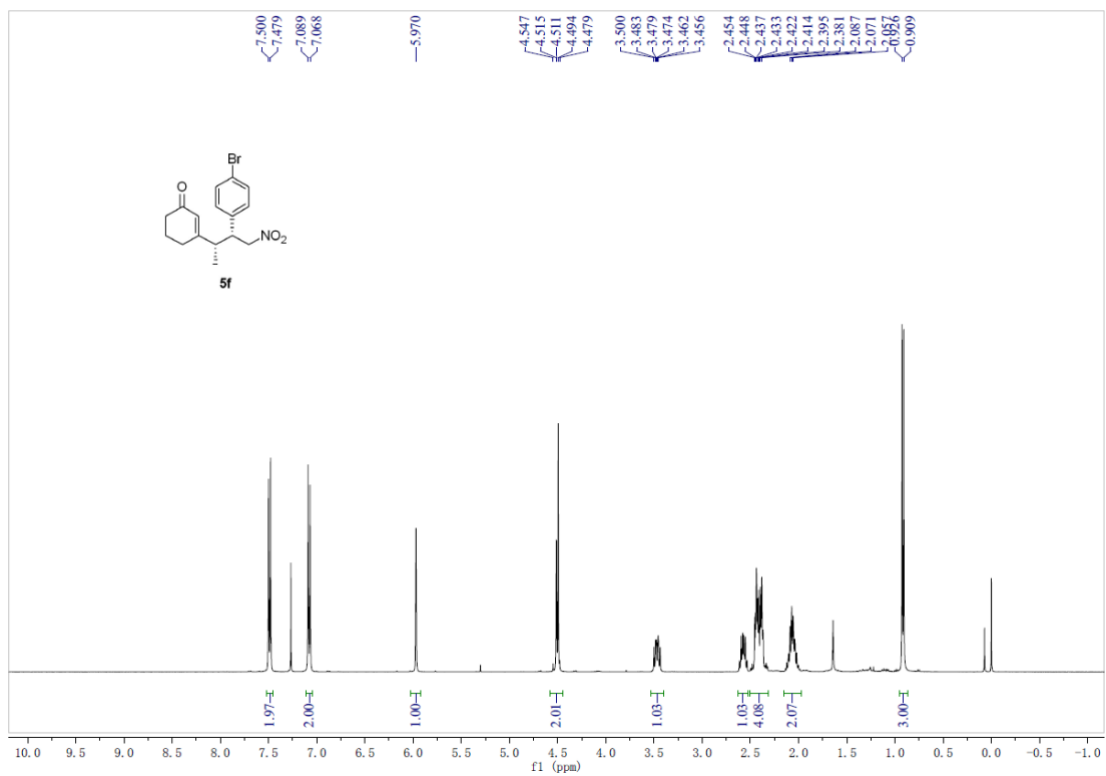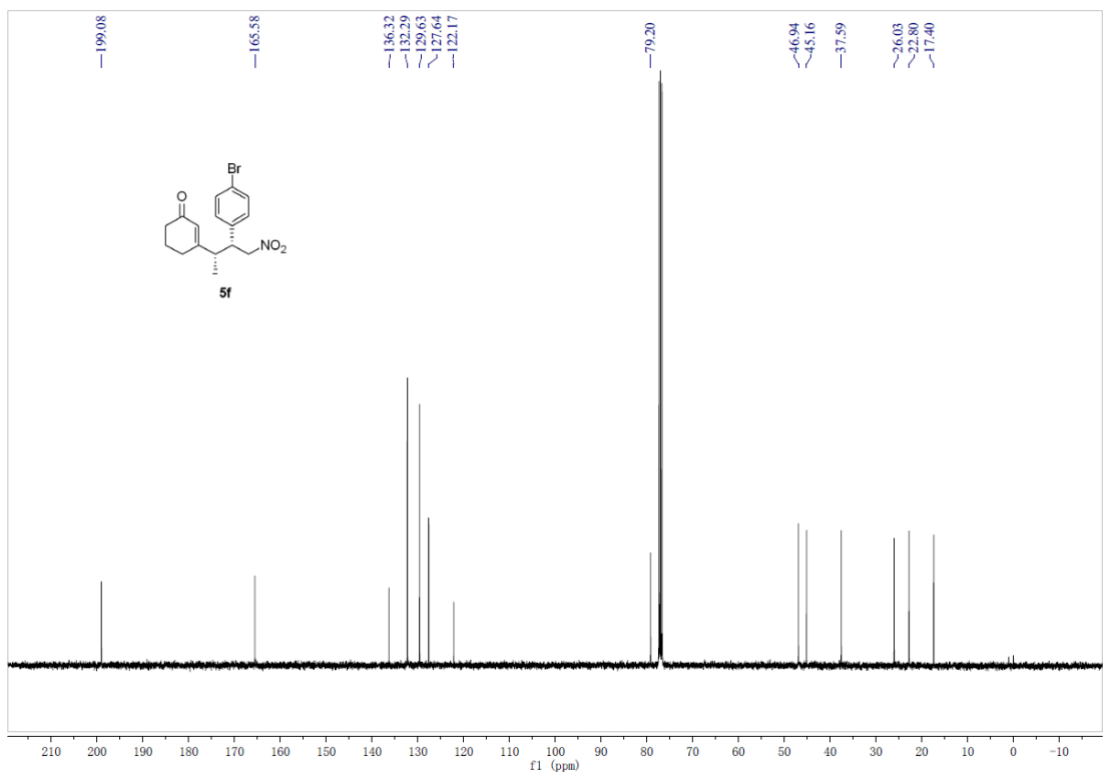

**5g: 3-((2*S*,3*R*)-4-nitro-3-(3-nitrophenyl)butan-2-yl)cyclohex-2-en-1-one**

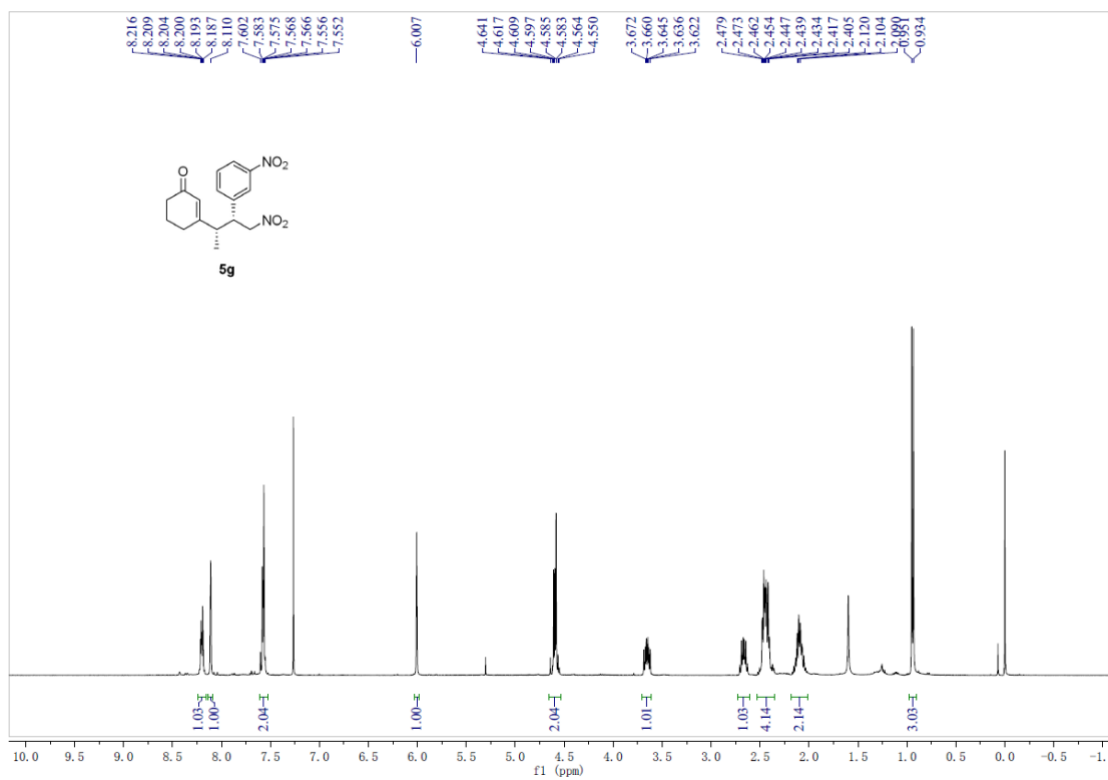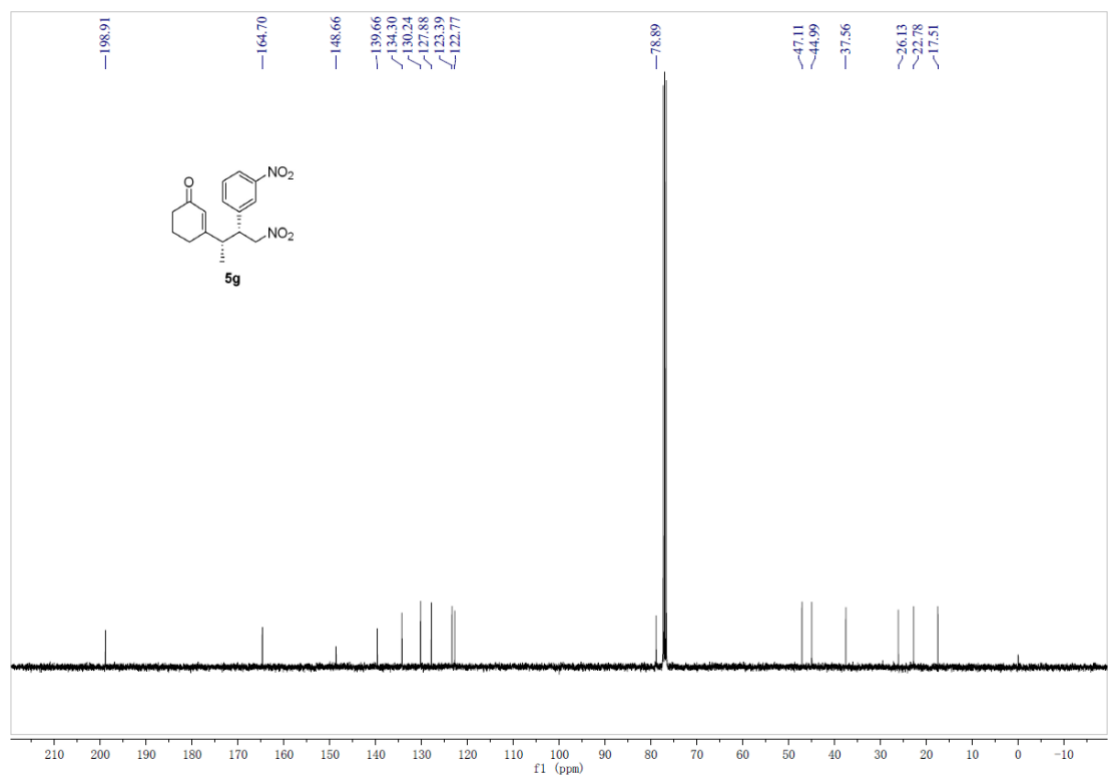



**5h: 3-((2S,3R)-3-(naphthalen-2-yl)-4-nitrobutan-2-yl)cyclohex-2-en-1-one**

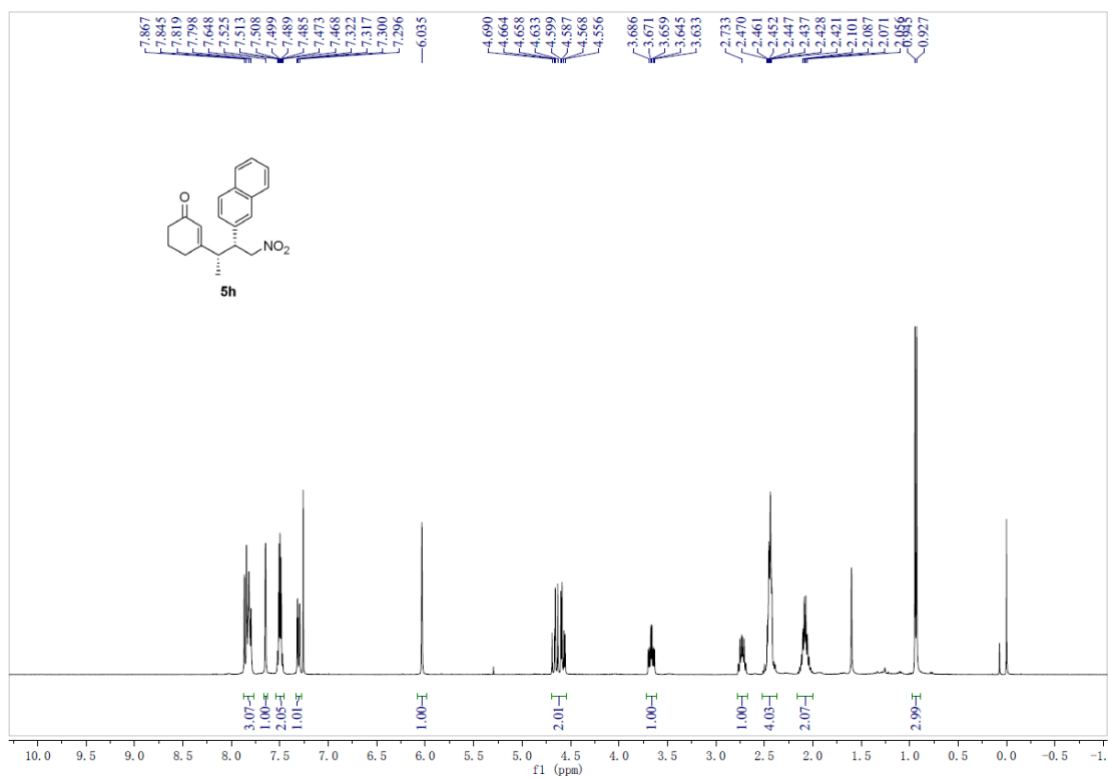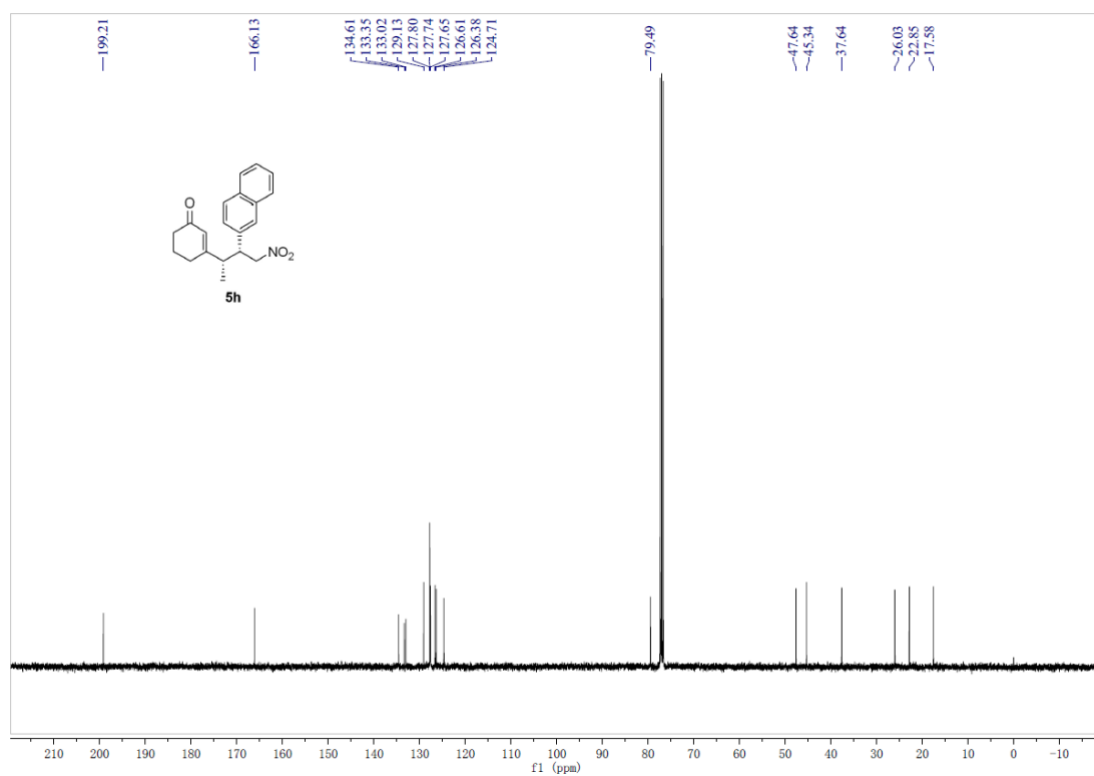

**5i: 3-((2*S*,3*S*)-3-(furan-2-yl)-4-nitrobutan-2-yl)cyclohex-2-en-1-one**

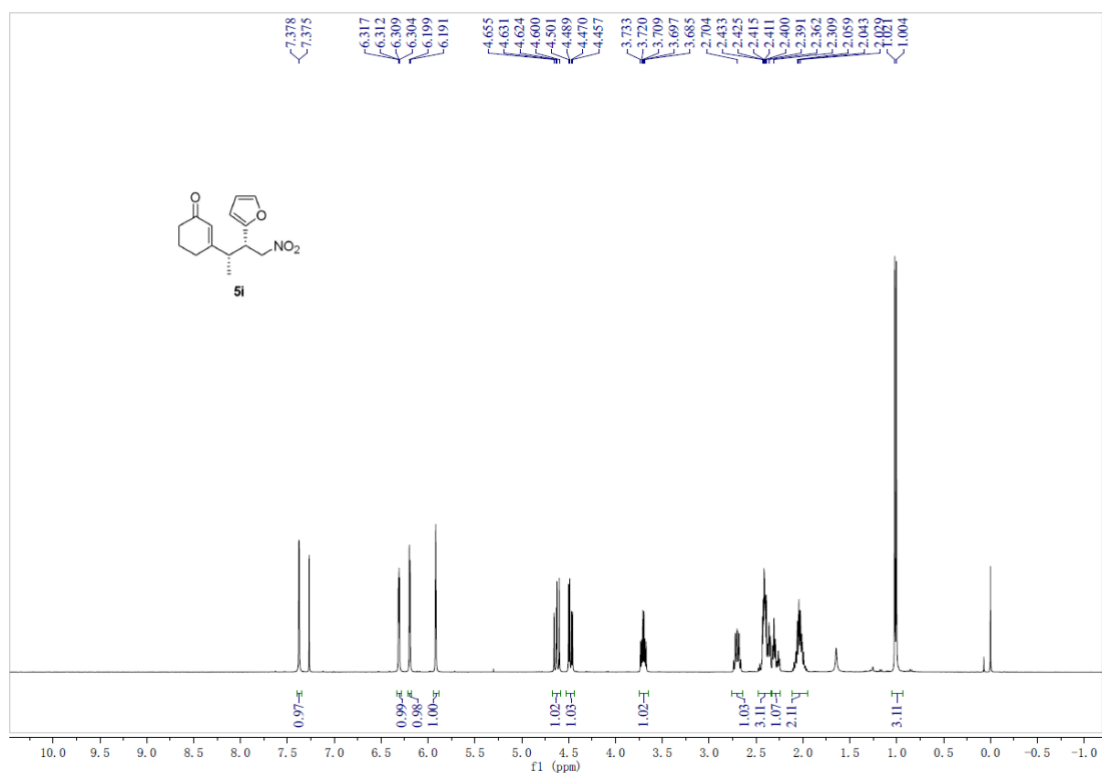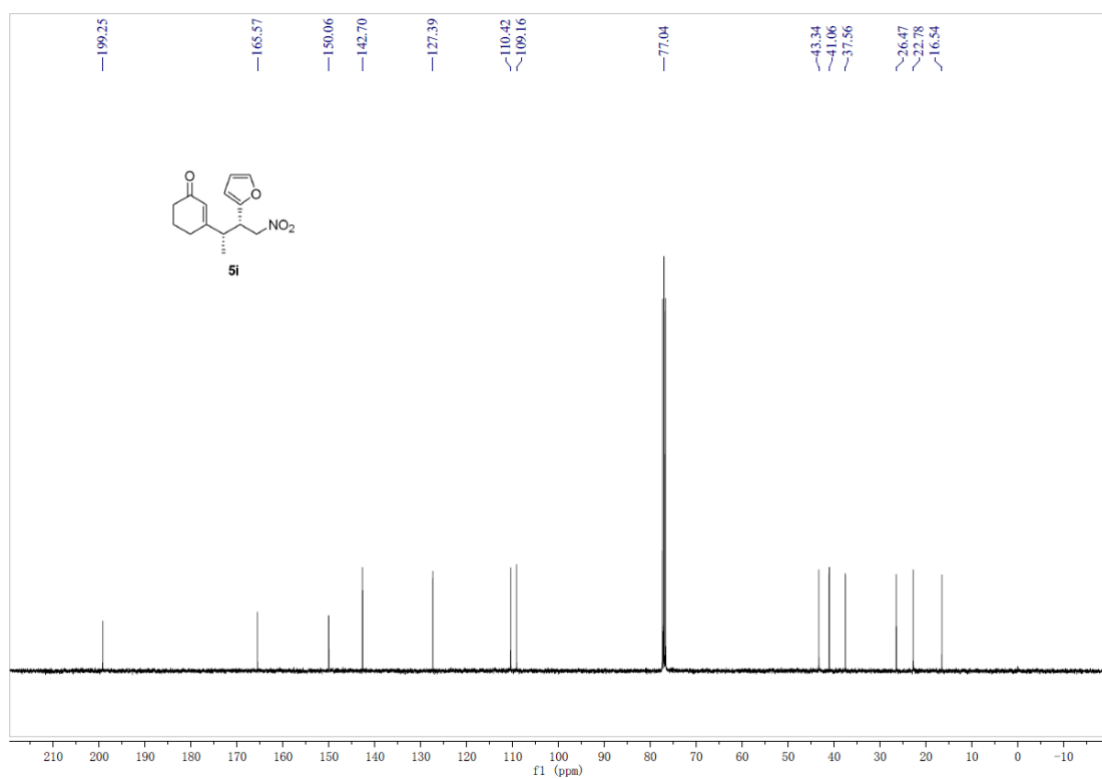

**5j: 3-((2R,3S)-1-nitro-2-phenylpentan-3-yl)cyclohex-2-en-1-one**

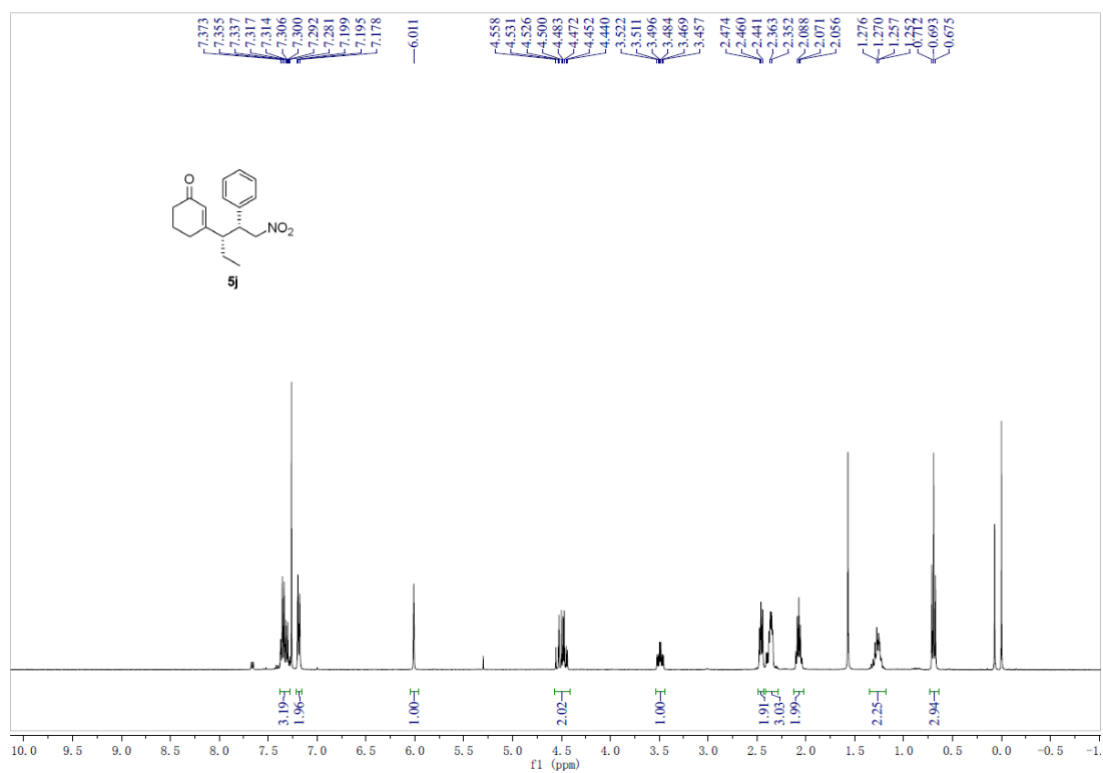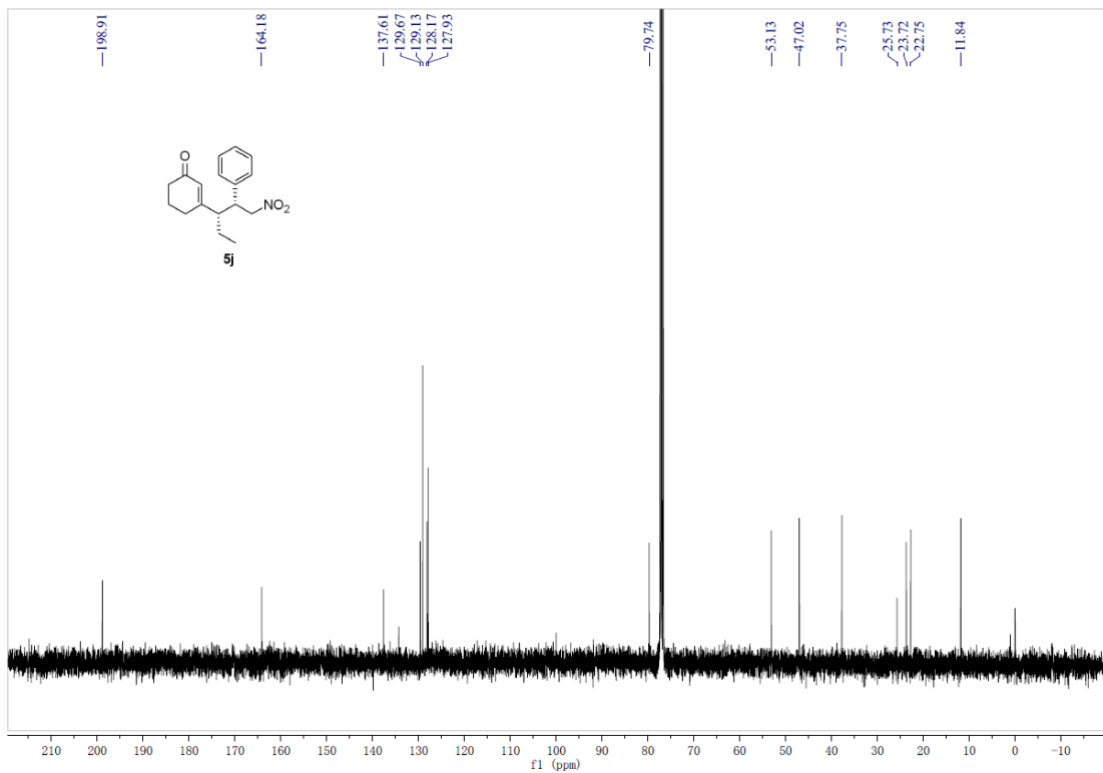

**5k: 3-((2R,3S)-1-nitro-2-phenylhexan-3-yl)cyclohex-2-en-1-one**

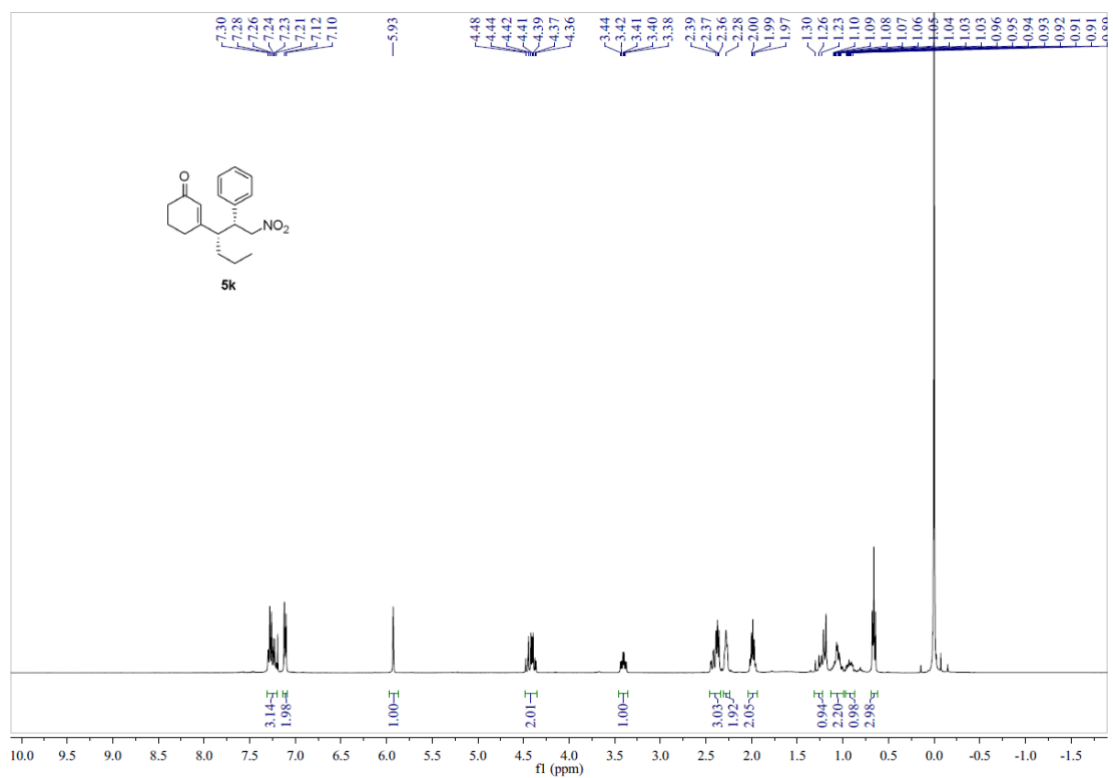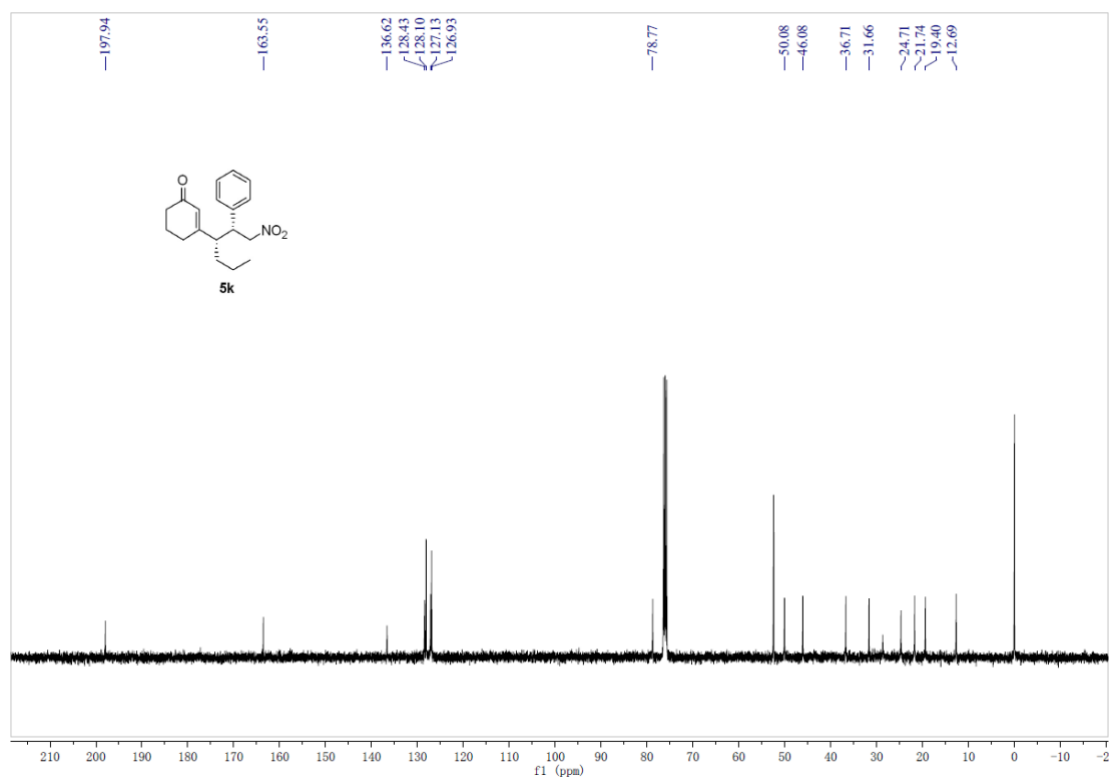

**5l: 3-((2R,3S)-1-nitro-2-phenylheptan-3-yl)cyclohex-2-en-1-one**

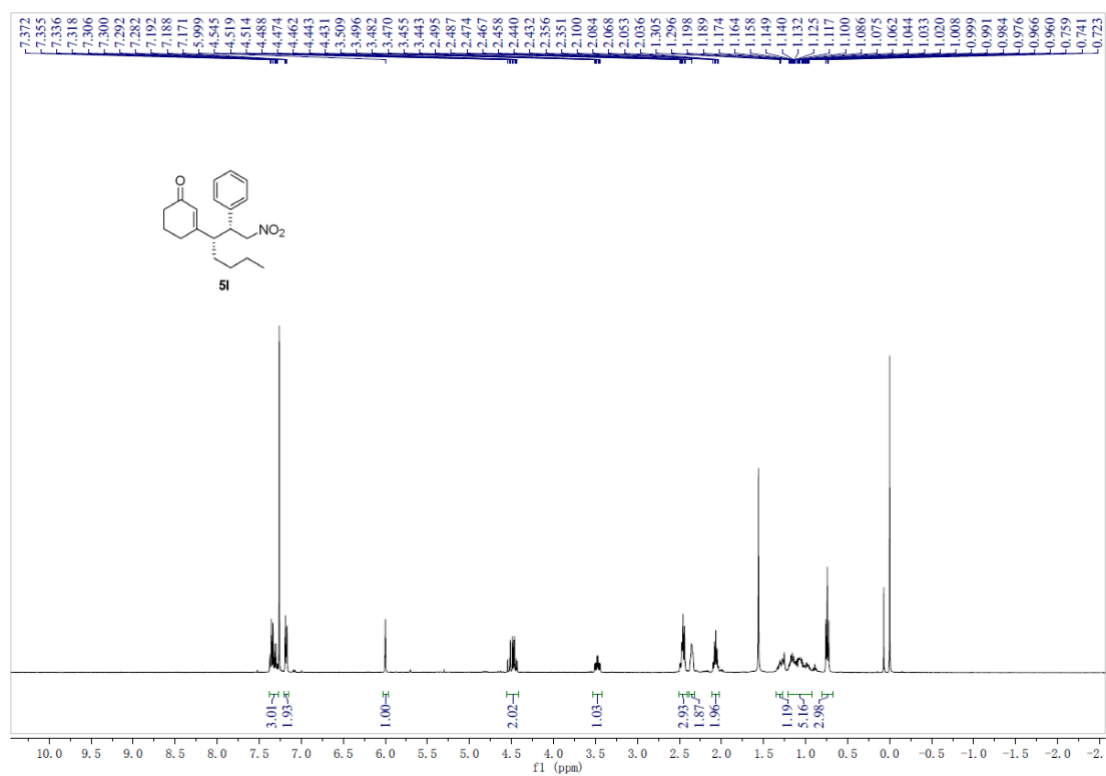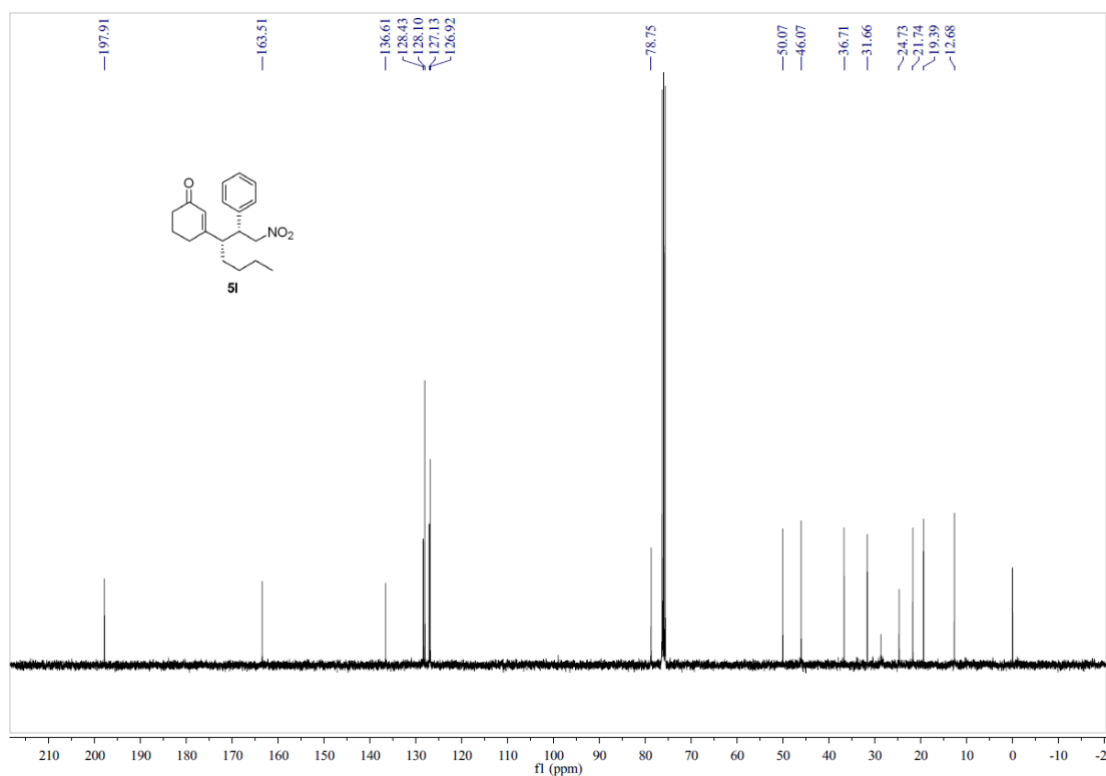

**5m: 3-((2R,3S)-1-nitro-2-phenyloctan-3-yl)cyclohex-2-en-1-one**

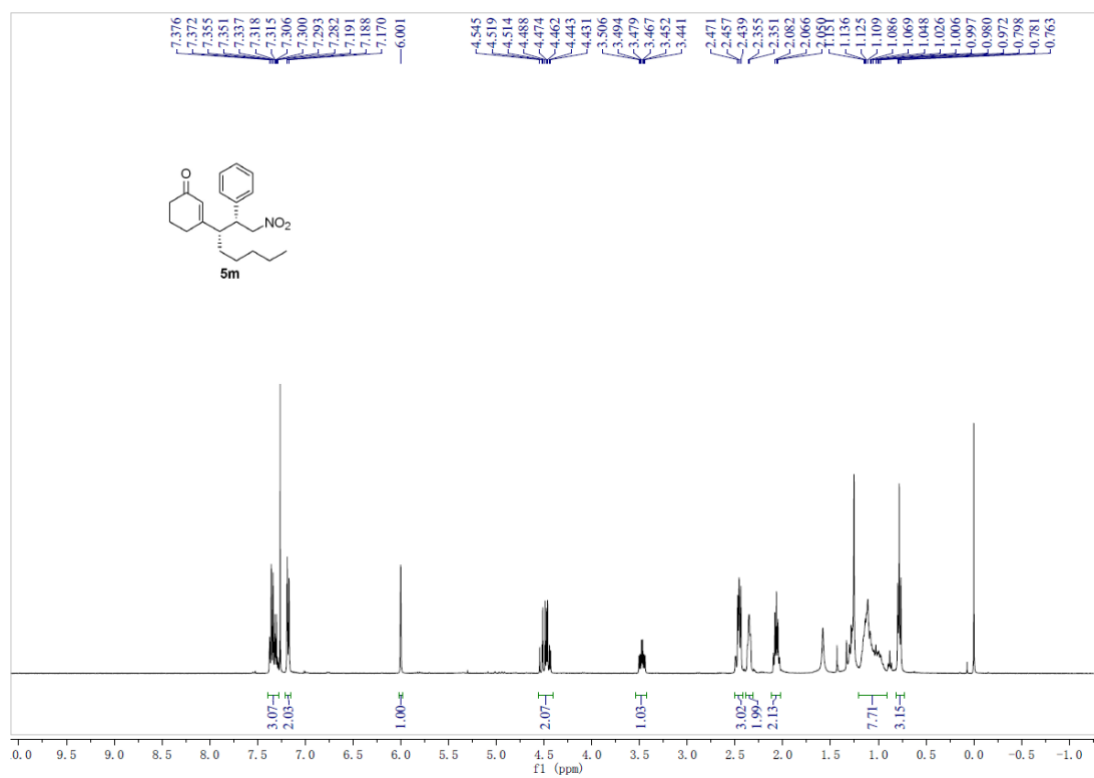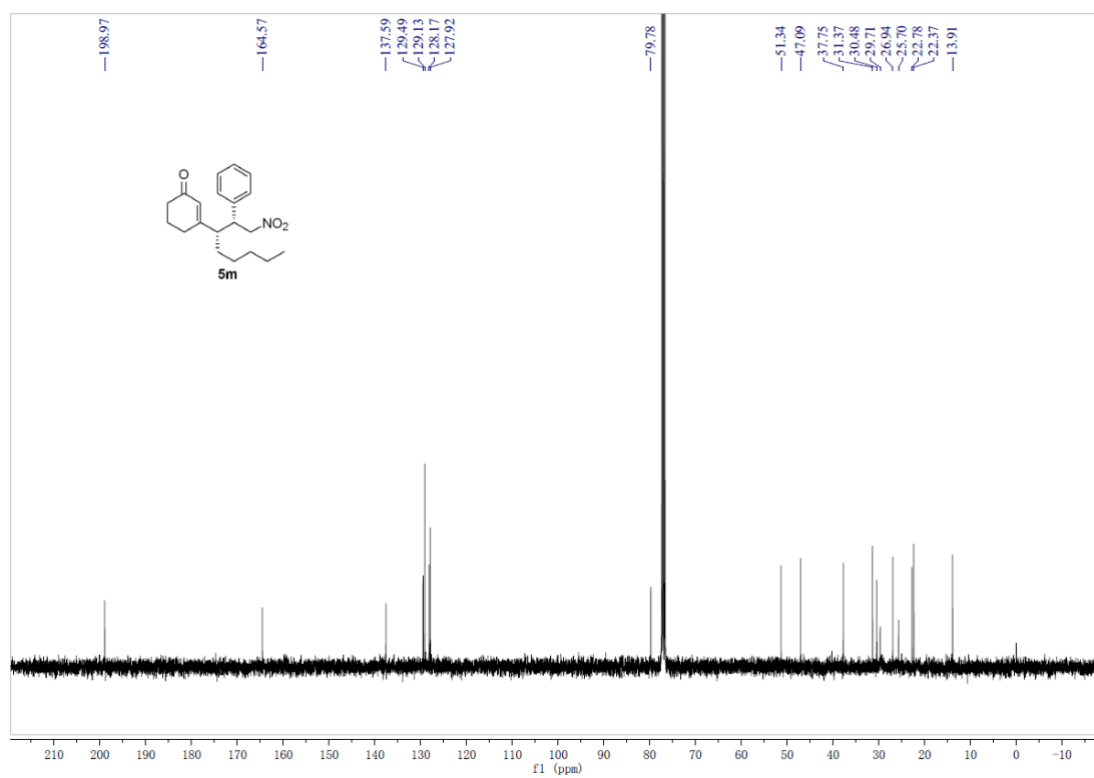

**5n: 3-((1*S*,2*R*)-3-nitro-1,2-diphenylpropyl)cyclohex-2-en-1-one**

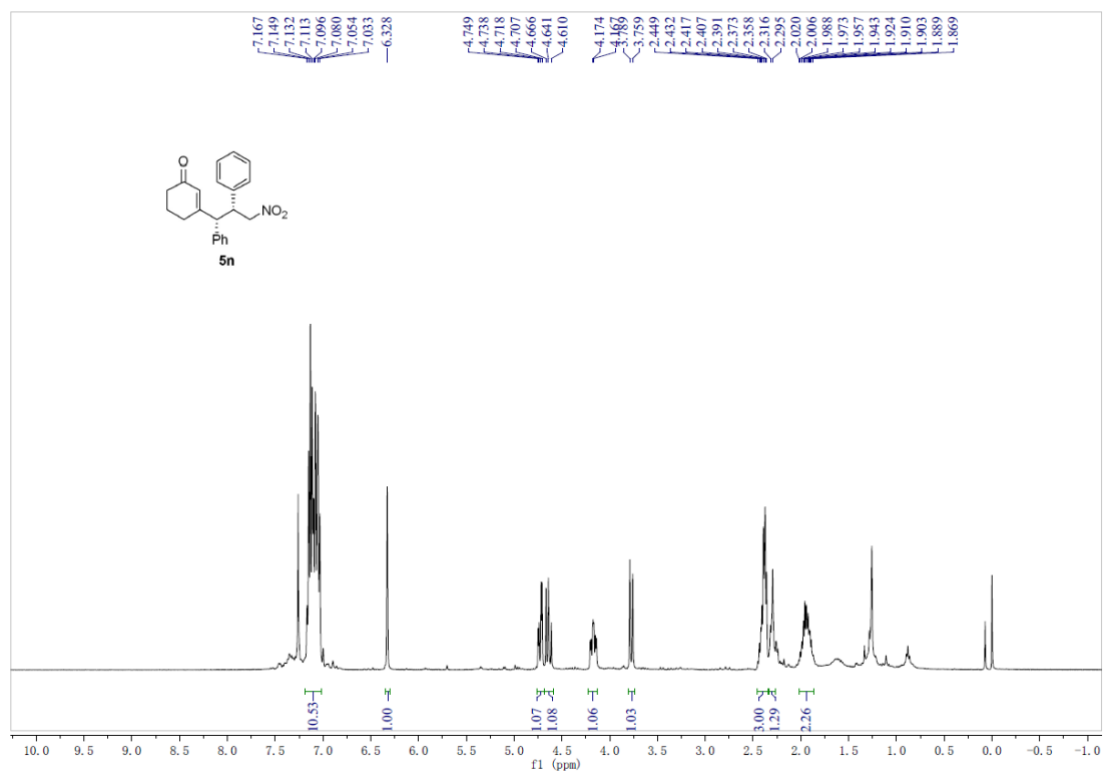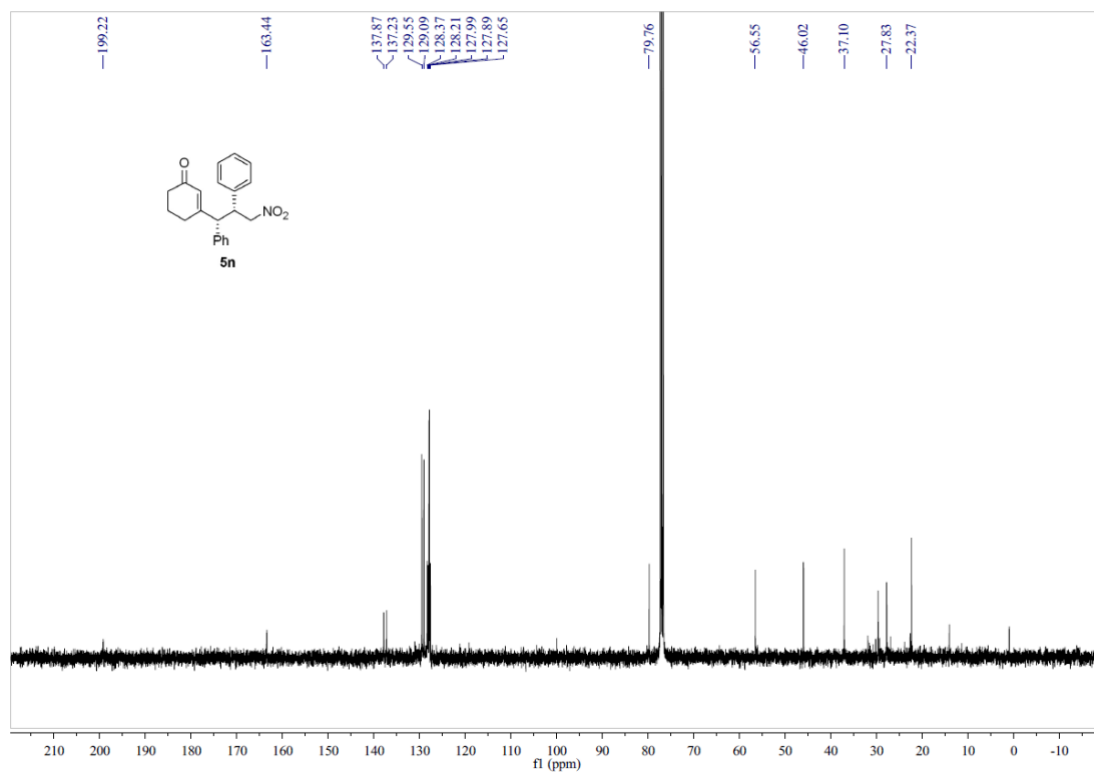

**5o: 3-((2*S*,3*R*)-4-nitro-1,3-diphenylbutan-2-yl)cyclohex-2-en-1-one**

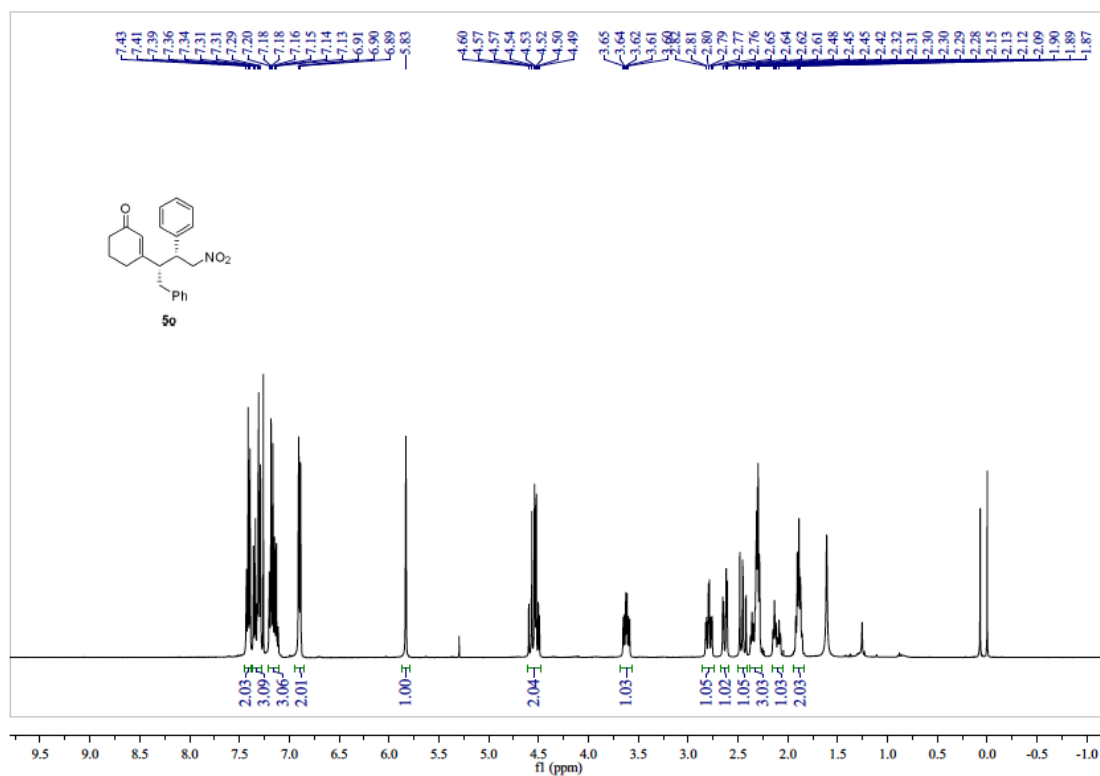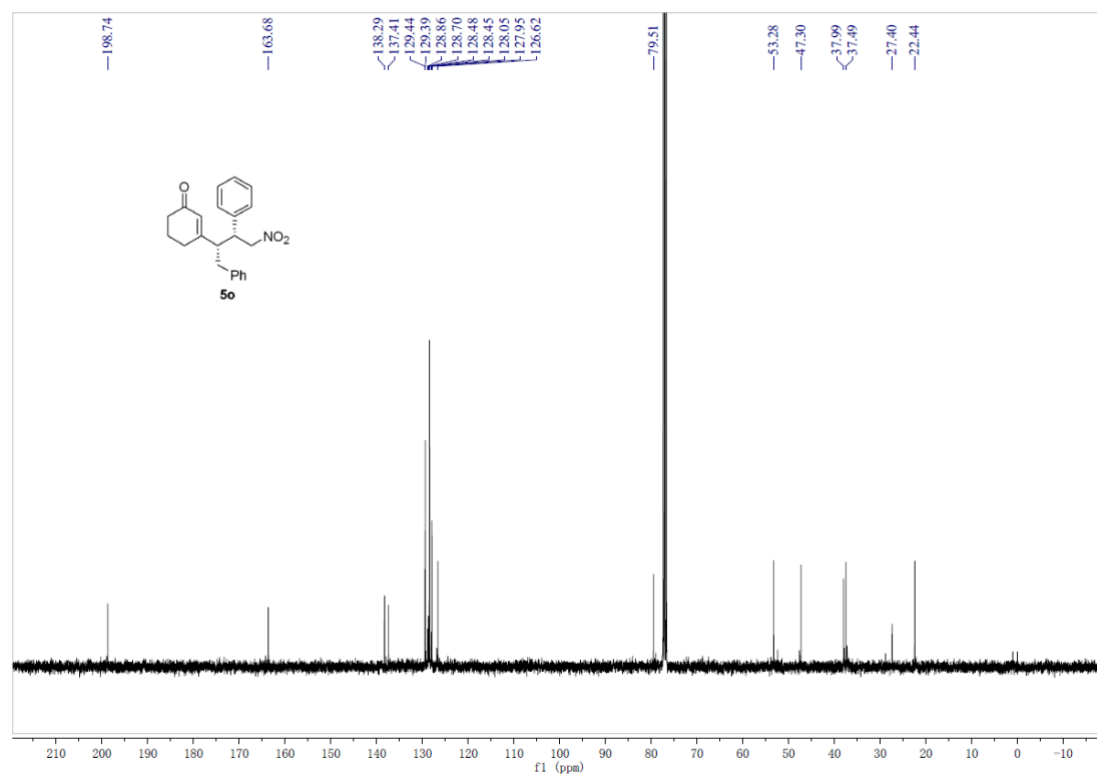



**5p: 3-((2*R*,3*S*)-2-(4-bromophenyl)-1-nitrohexan-3-yl)cyclohex-2-en-1-one**

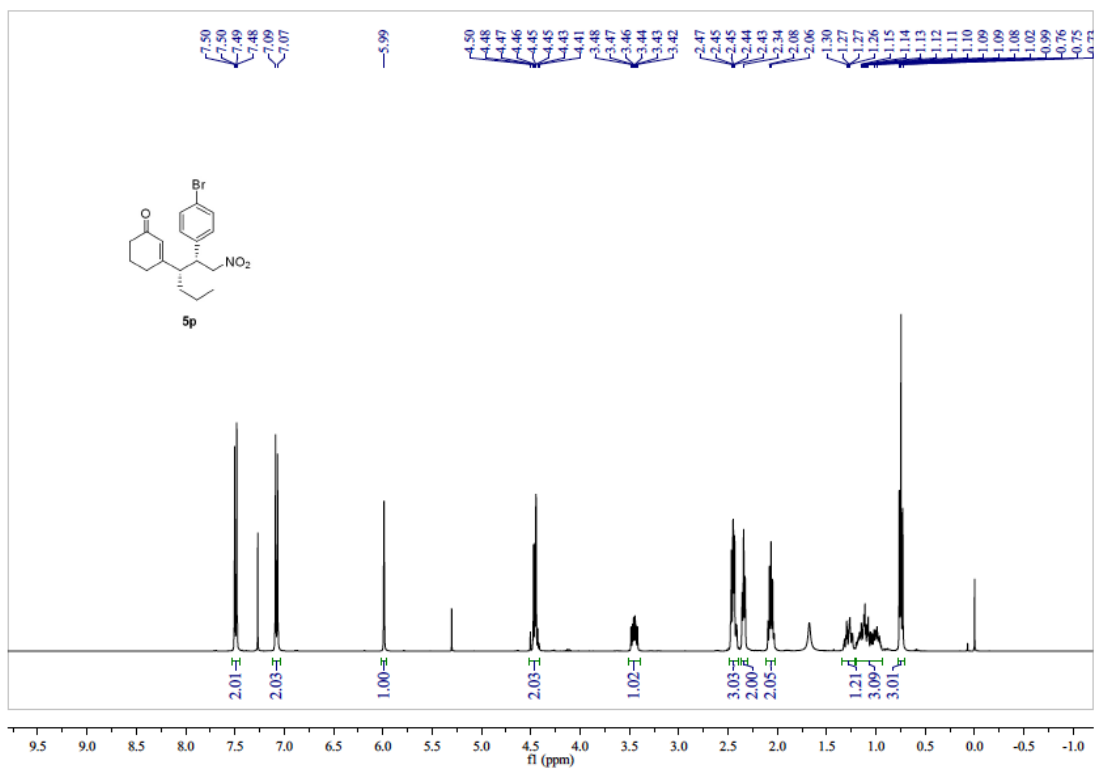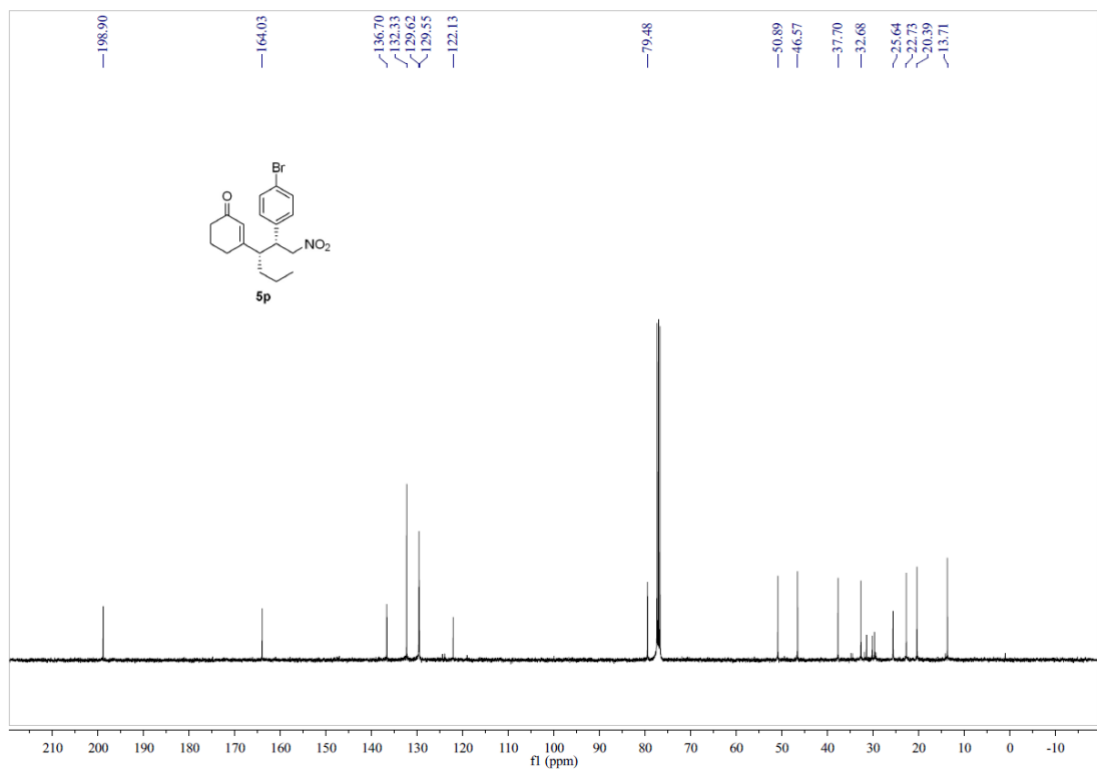

**6a: (R)-3-ethyl-4-((R)-2-nitro-1-phenylethyl)cyclohex-2-en-1-one**

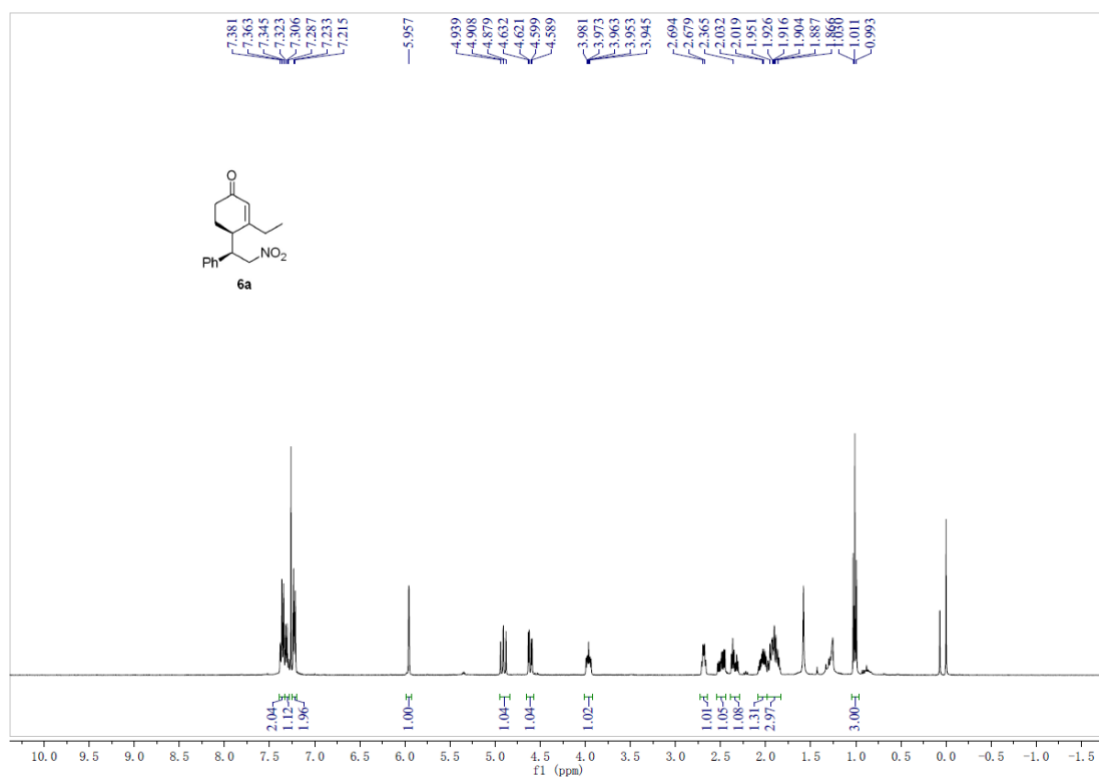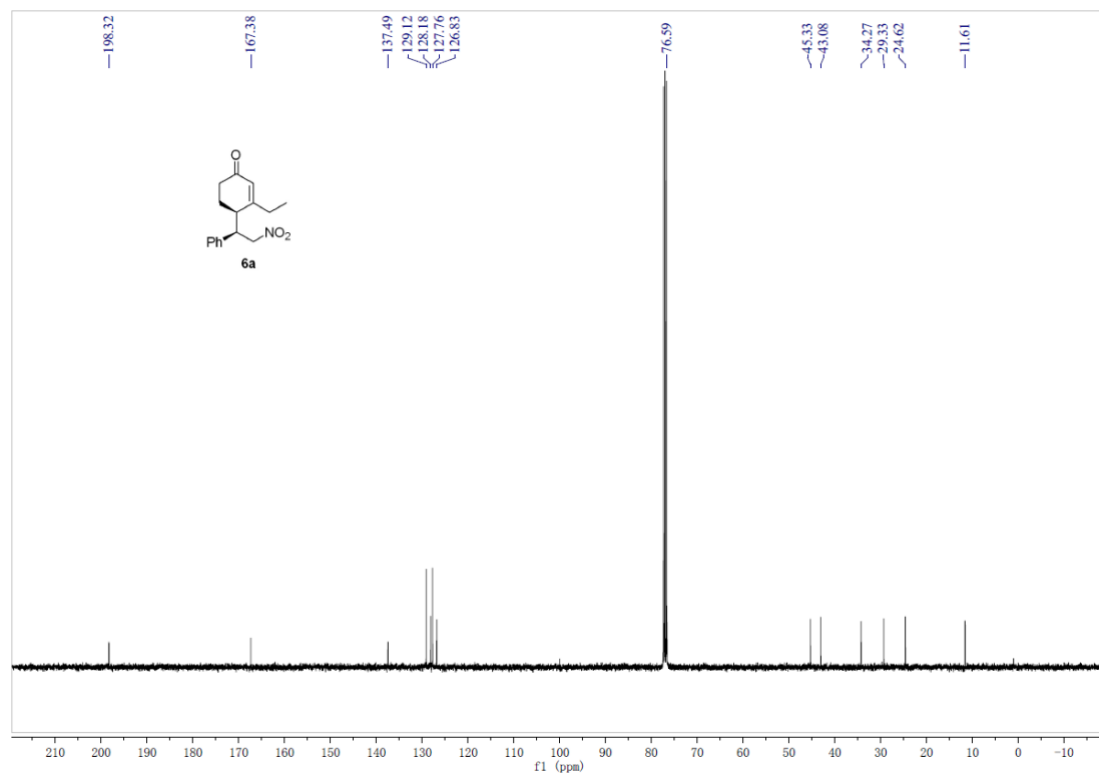

**6b: (R)-3-ethyl-4-((R)-2-nitro-1-(p-tolyl)ethyl)cyclohex-2-en-1-one**

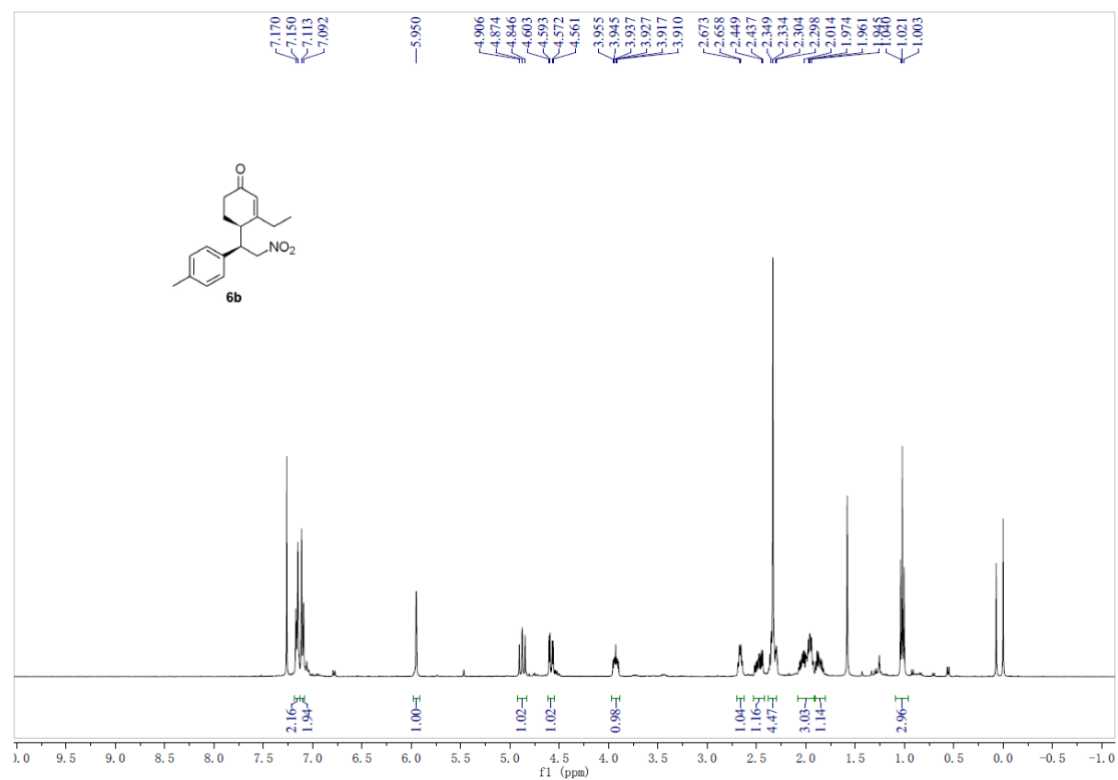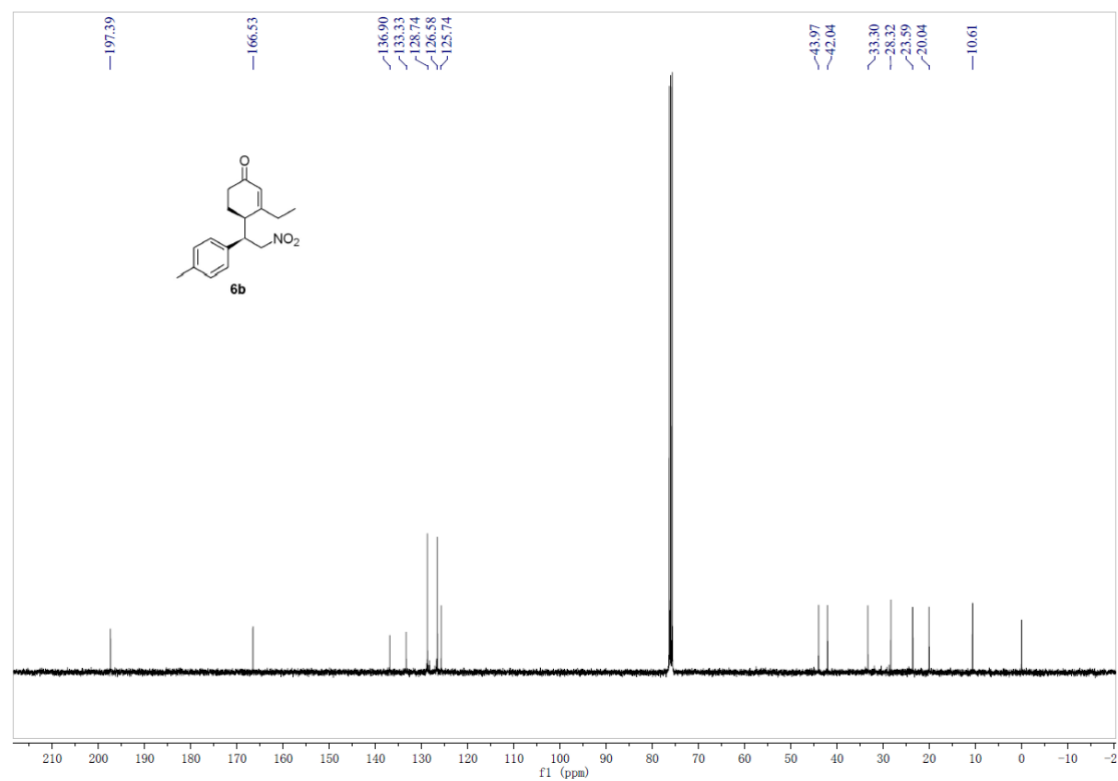

**6c: (R)-3-ethyl-4-((R)-1-(4-methoxyphenyl)-2-nitroethyl)cyclohex-2-en-1-one**

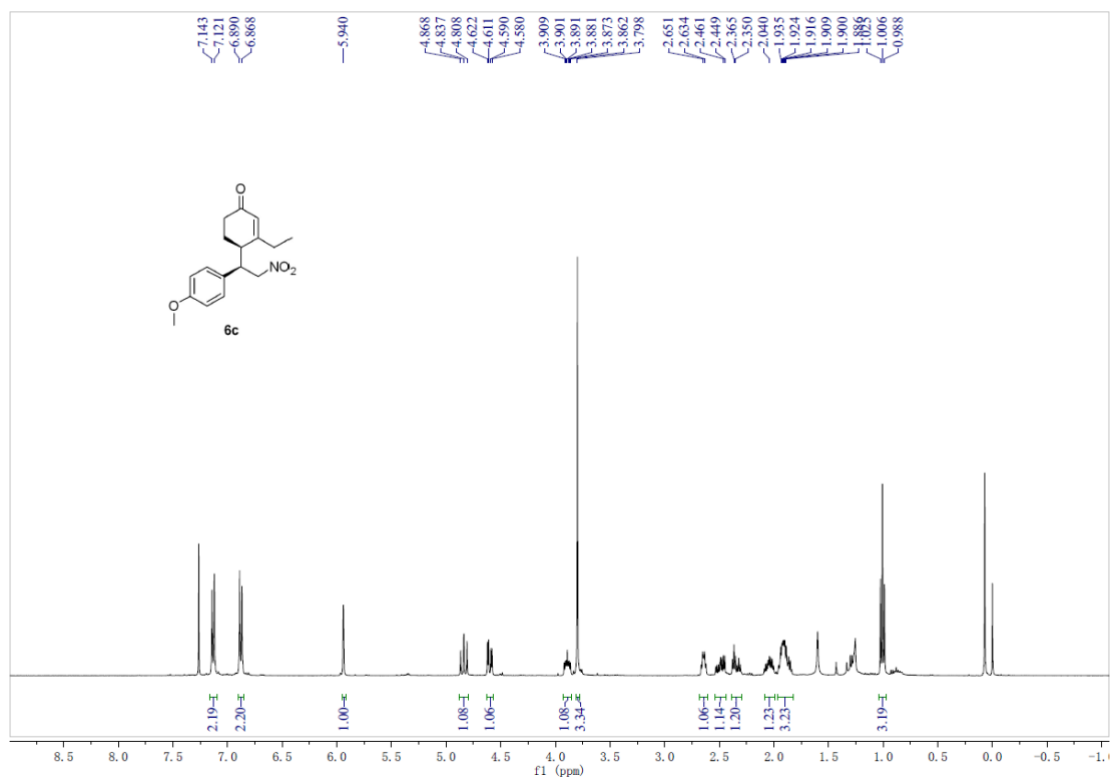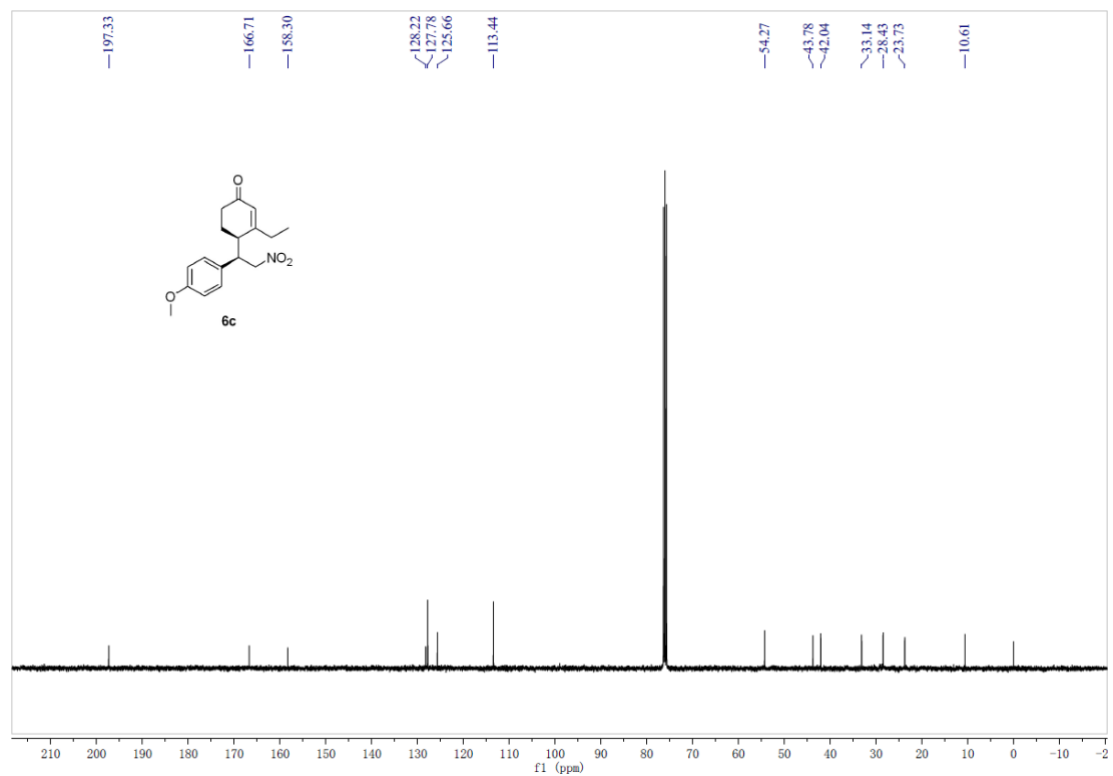

**6d: (R)-3-ethyl-4-((R)-1-(4-fluorophenyl)-2-nitroethyl)cyclohex-2-en-1-one**

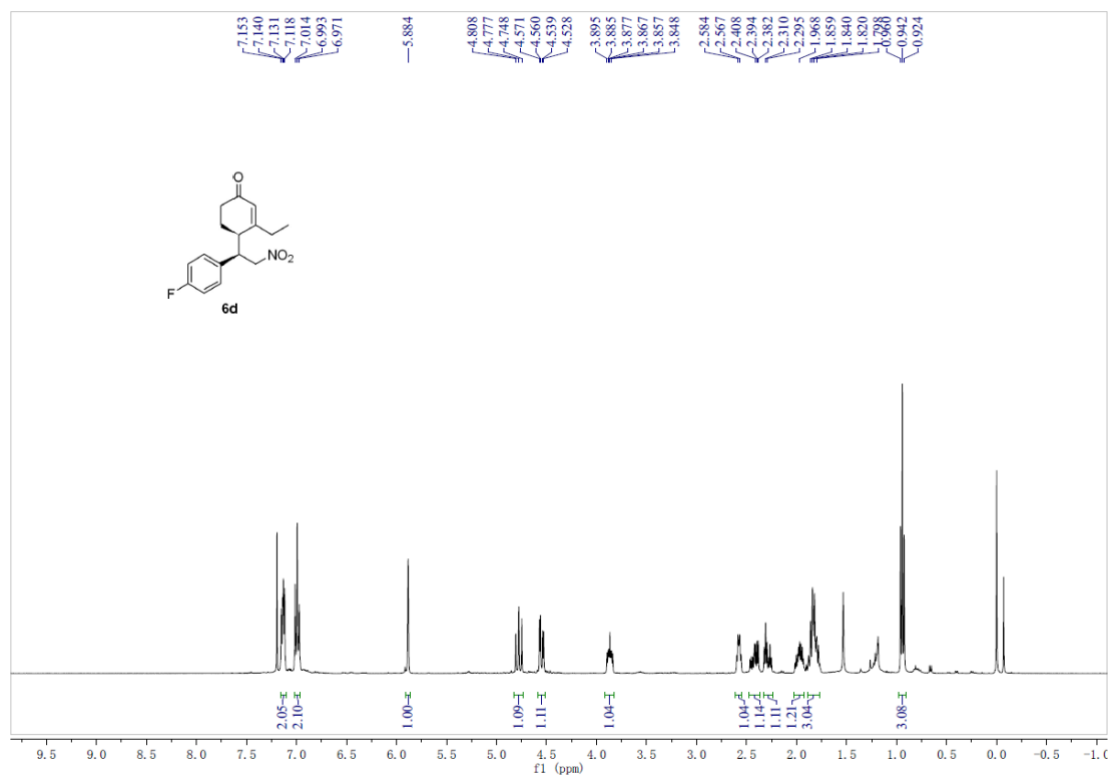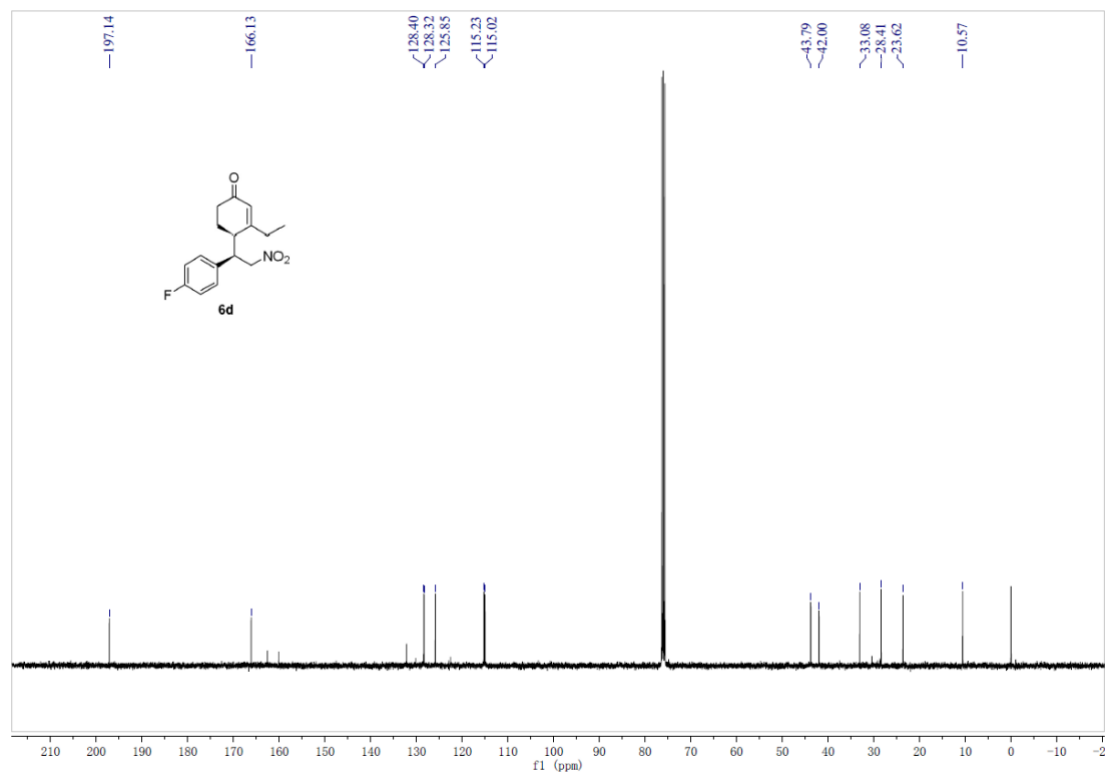

**6e: (R)-4-((R)-1-(4-chlorophenyl)-2-nitroethyl)-3-ethylcyclohex-2-en-1-one**

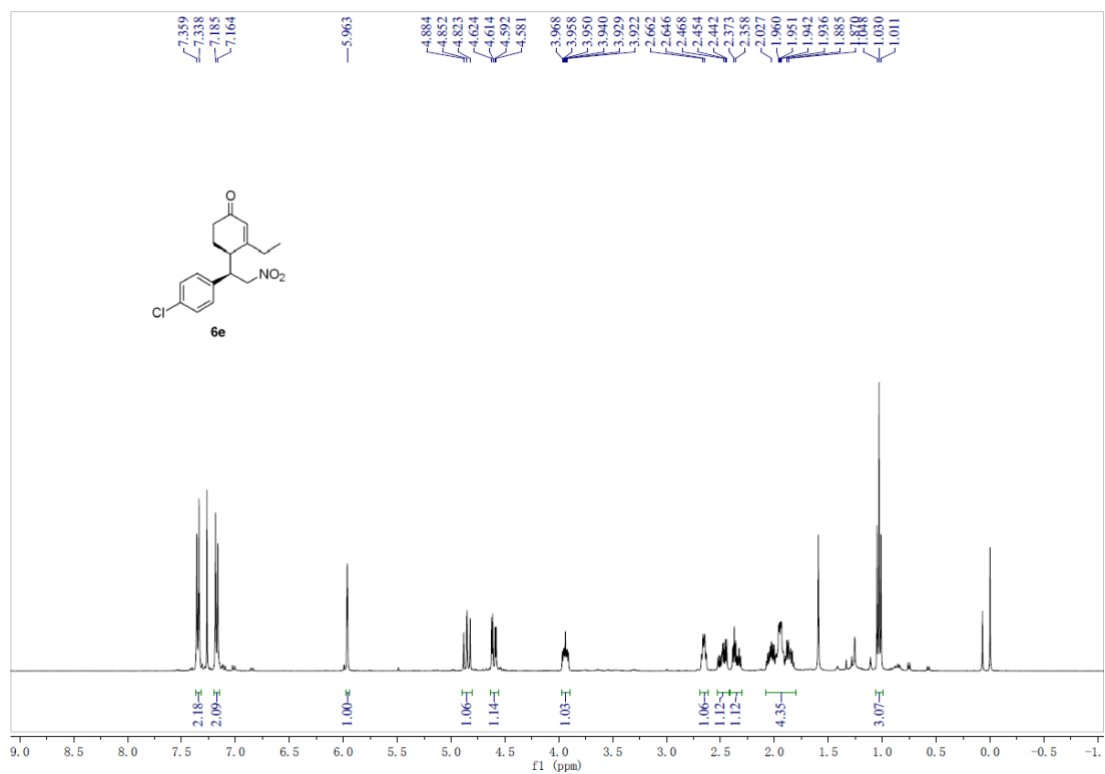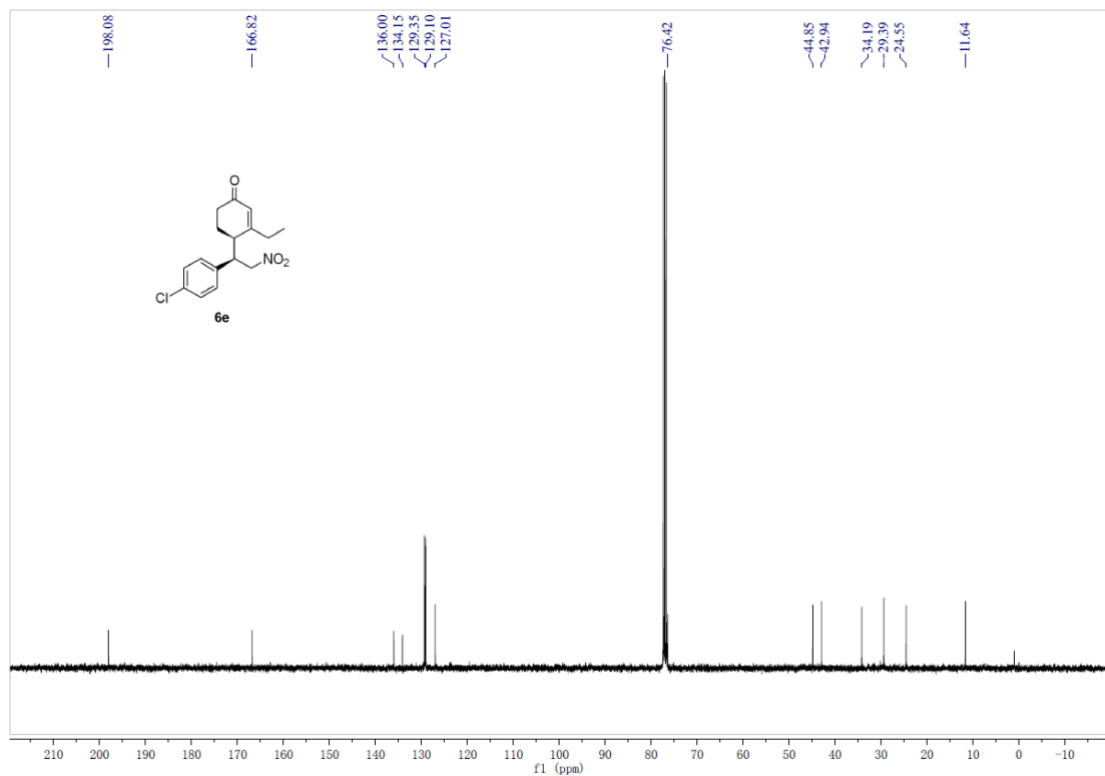

**6f: (R)-4-((R)-1-(4-bromophenyl)-2-nitroethyl)-3-ethylcyclohex-2-en-1-one**

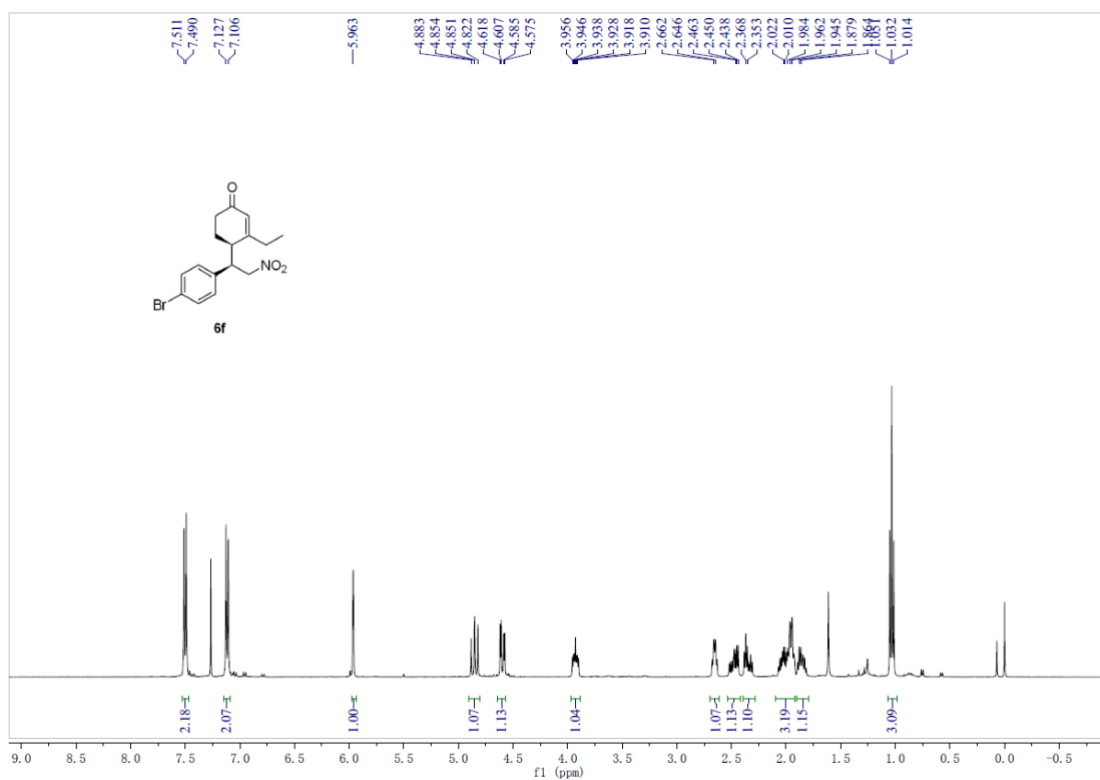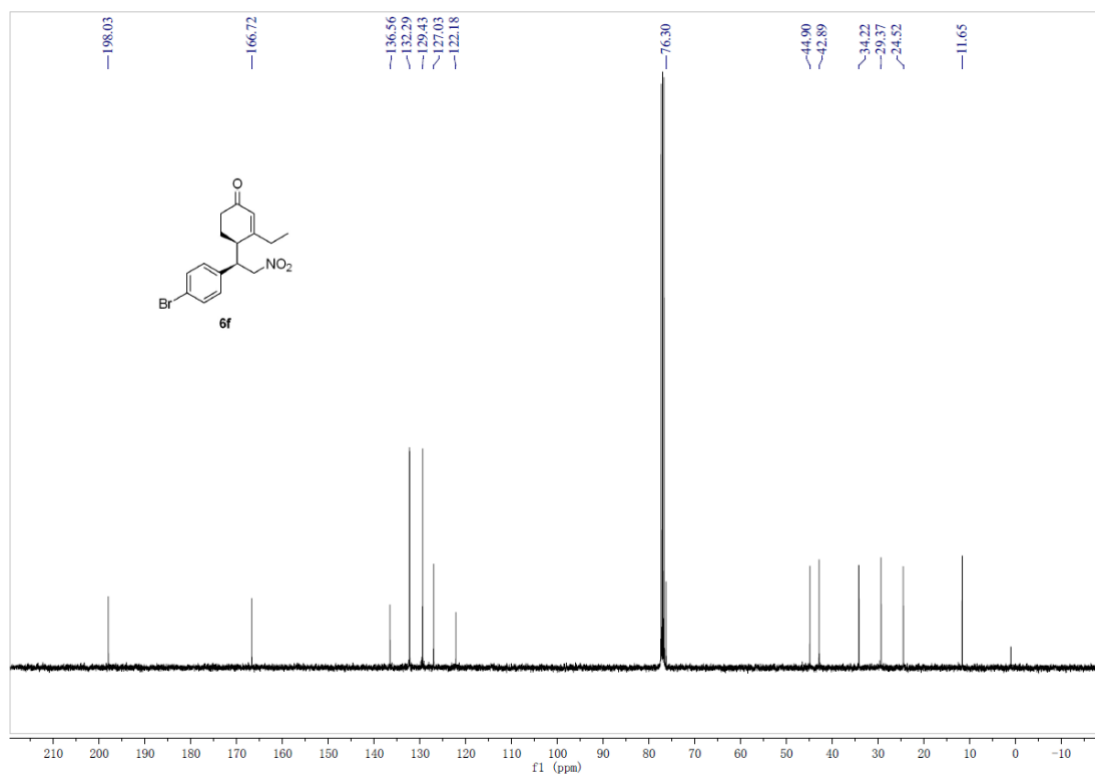

**6g: (R)-3-ethyl-4-((R)-2-nitro-1-(3-nitrophenyl)ethyl)cyclohex-2-en-1-one**

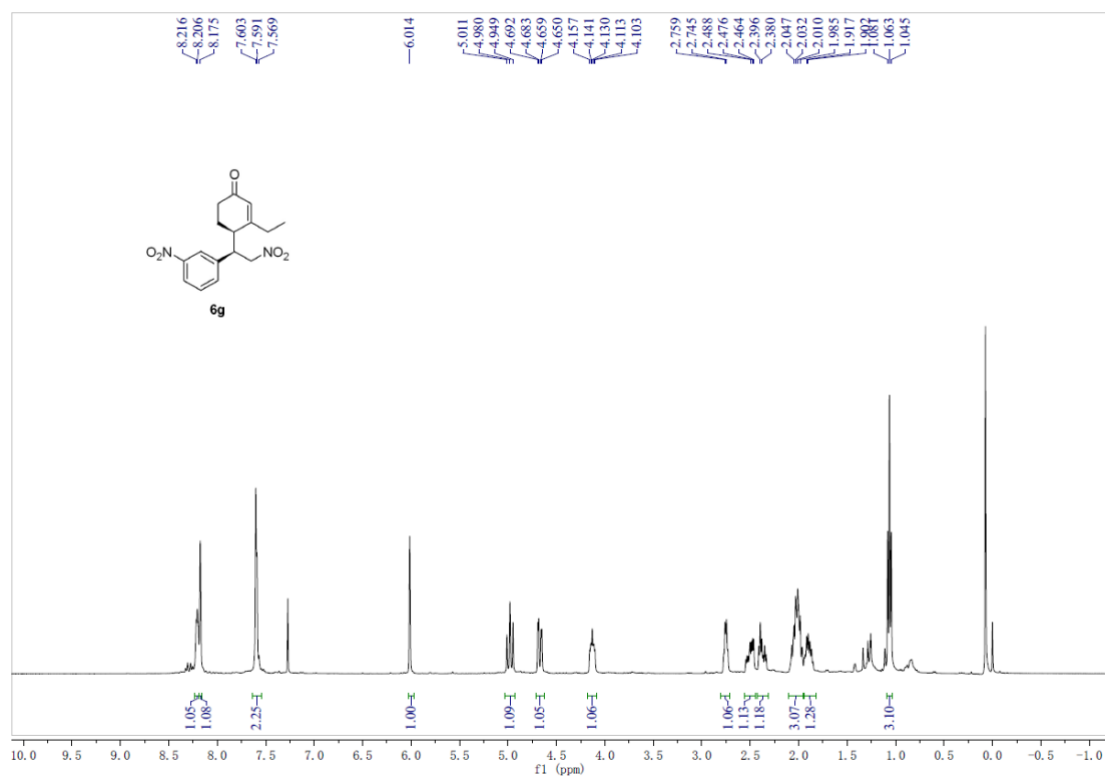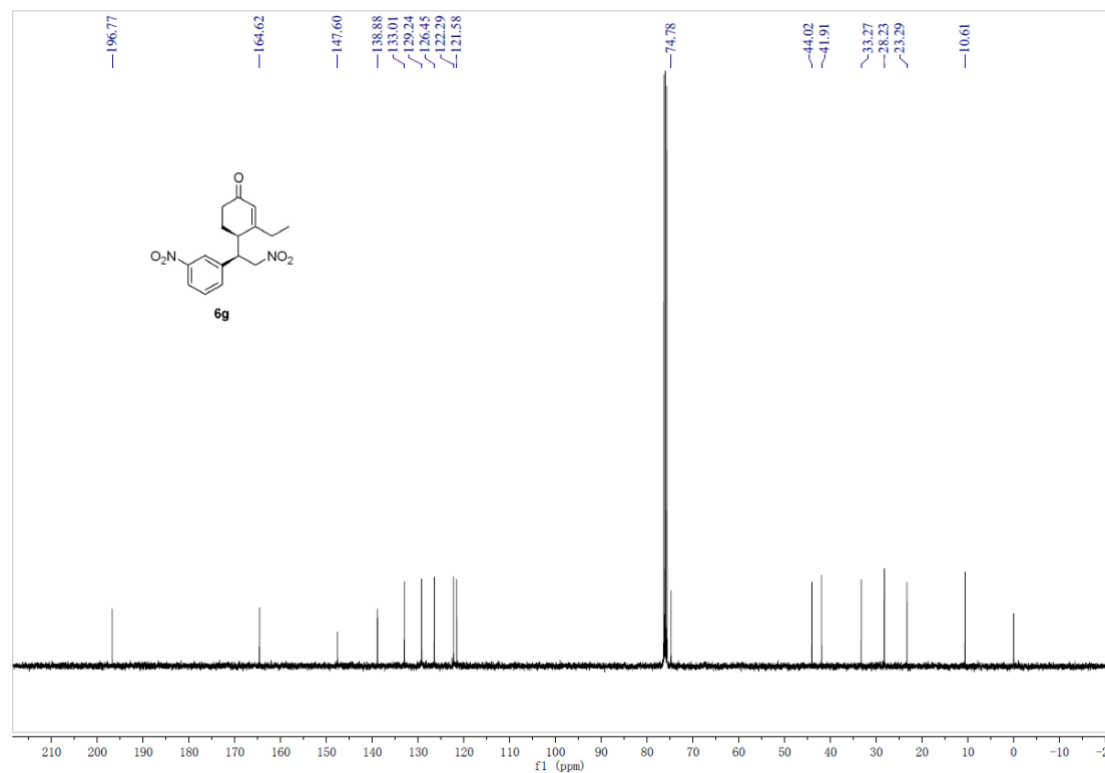



**6h: (R)-3-ethyl-4-((R)-1-(naphthalen-2-yl)-2-nitroethyl)cyclohex-2-en-1-one**

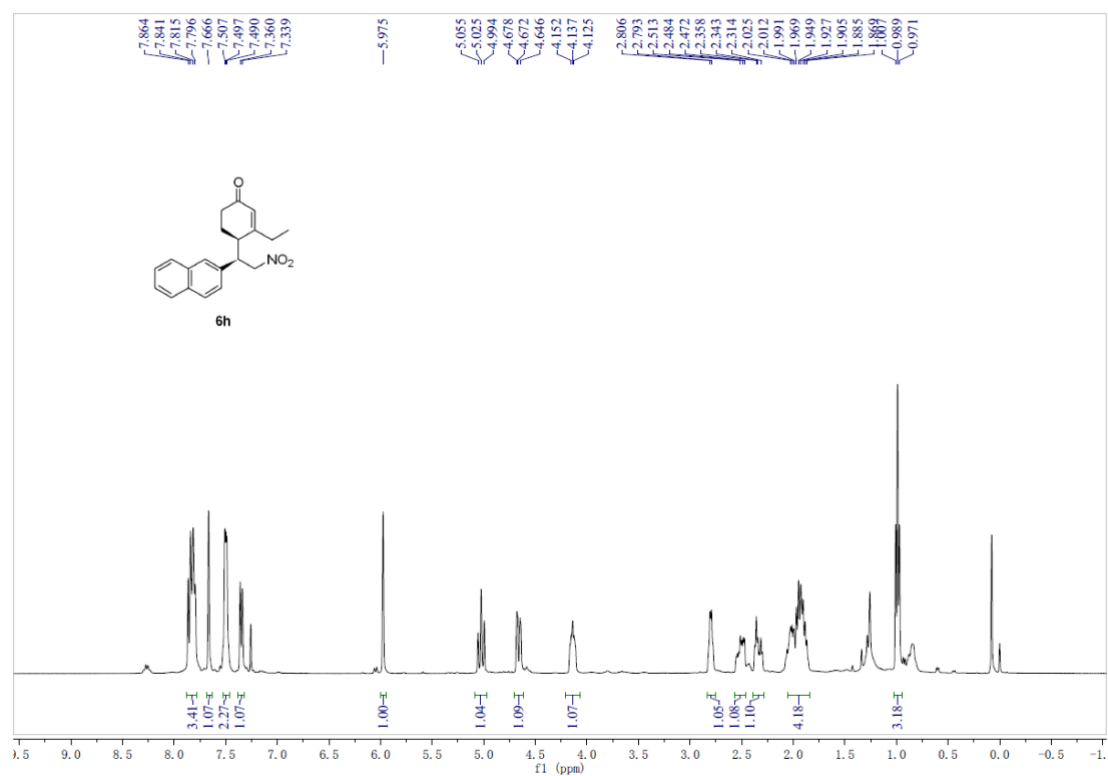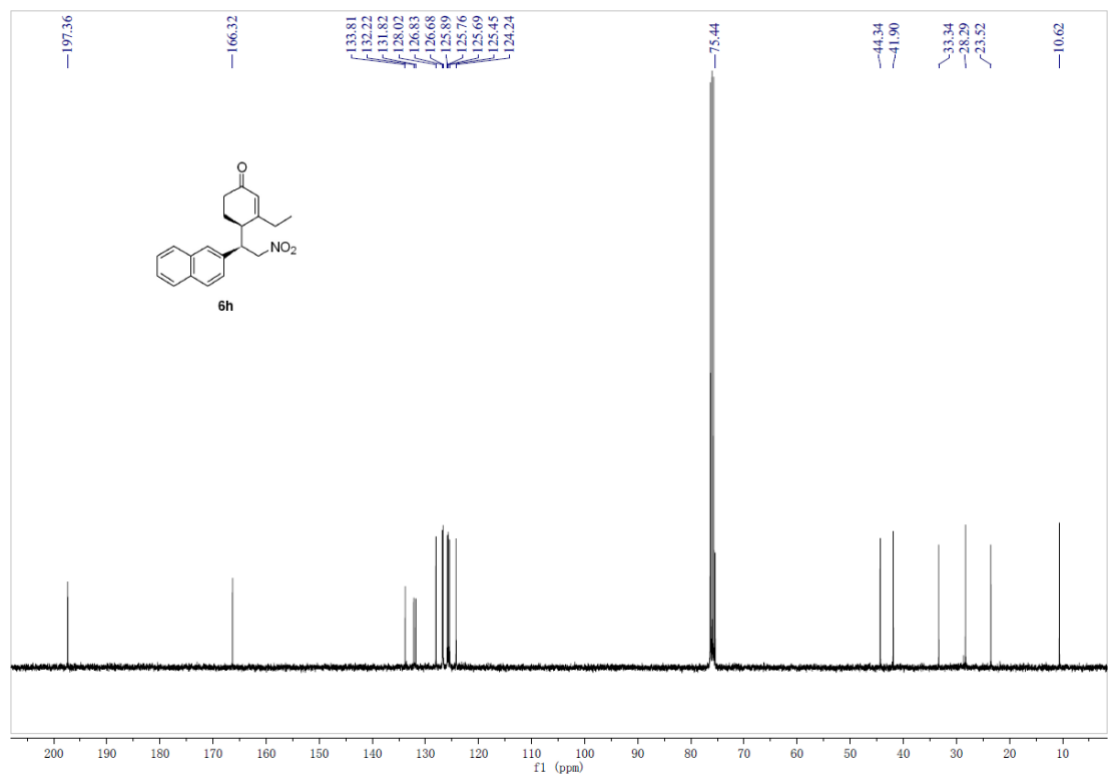

**6i: (R)-3-ethyl-4-((S)-1-(furan-2-yl)-2-nitroethyl)cyclohex-2-en-1-one**

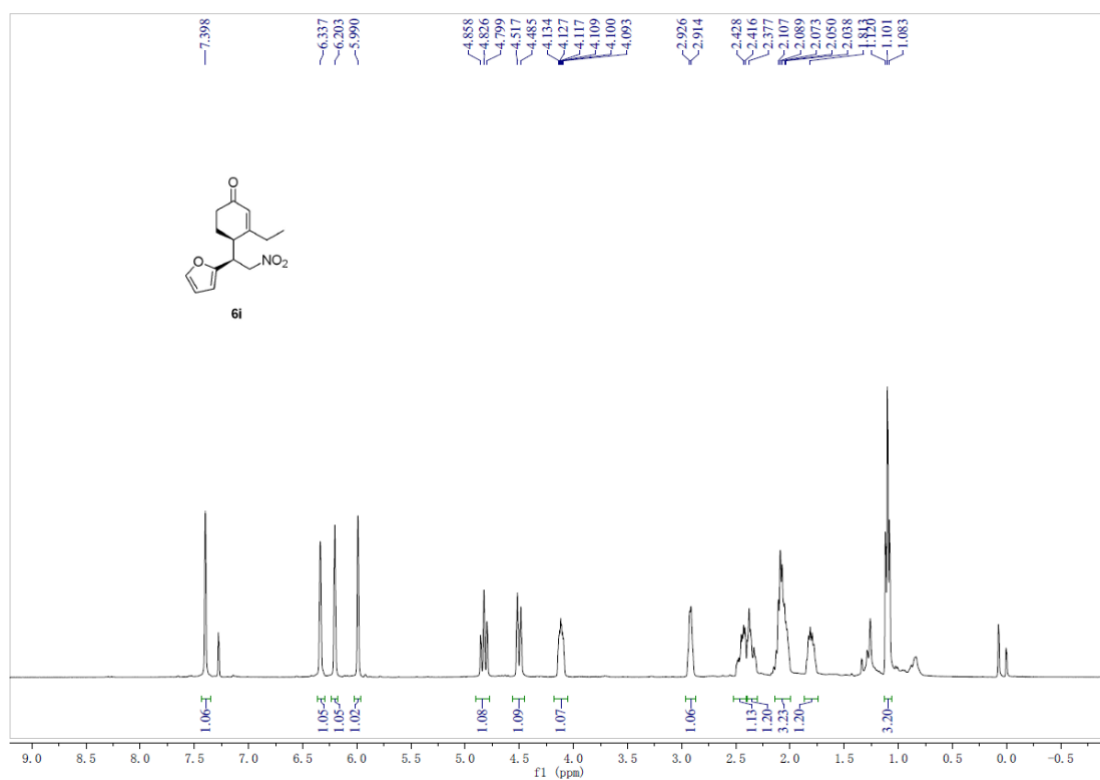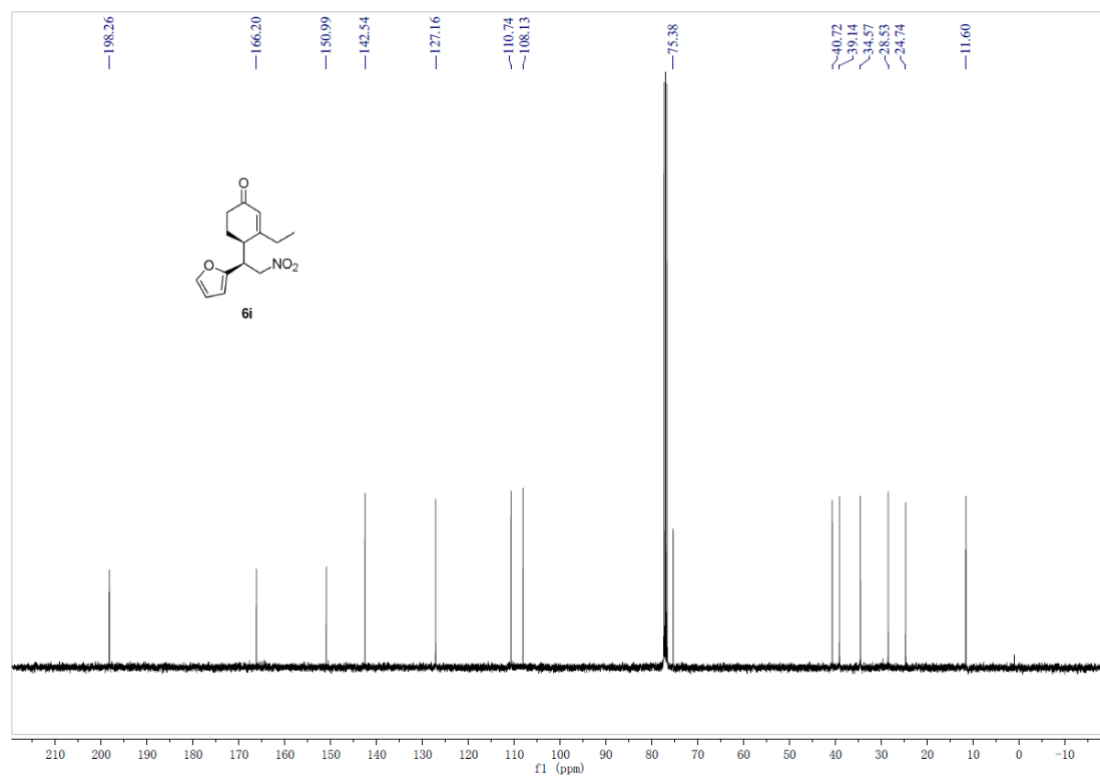

**6j: (R)-4-((R)-2-nitro-1-phenylethyl)-3-propylcyclohex-2-en-1-one**

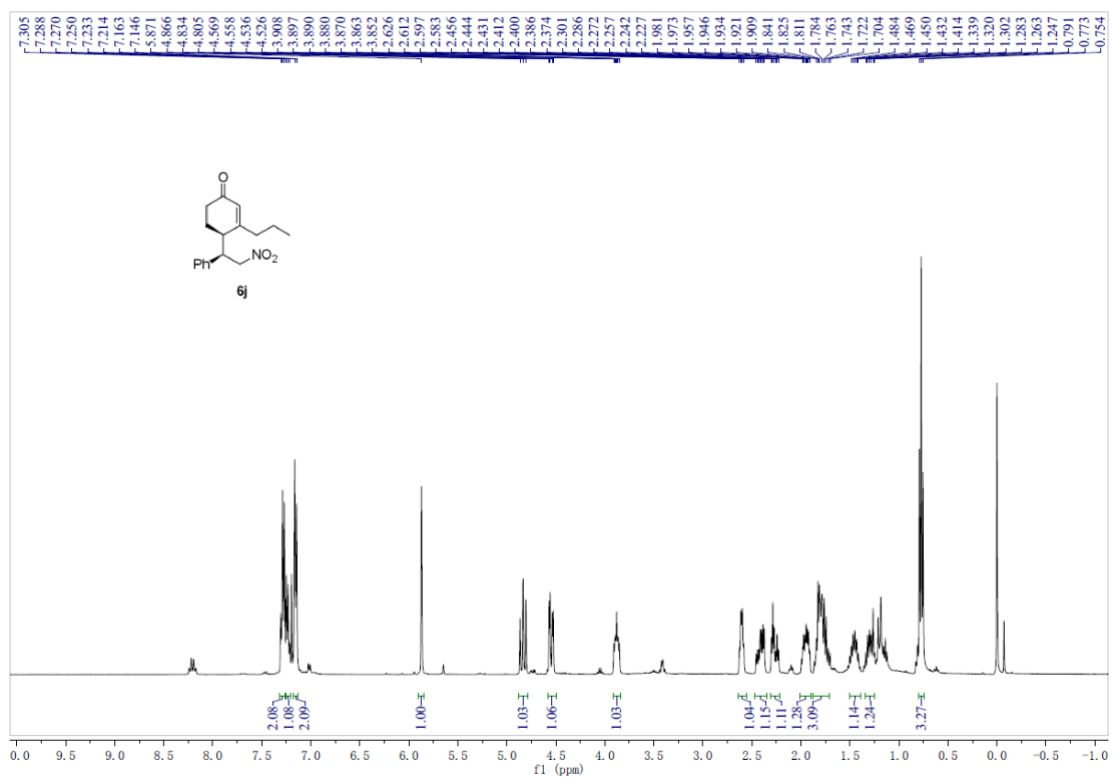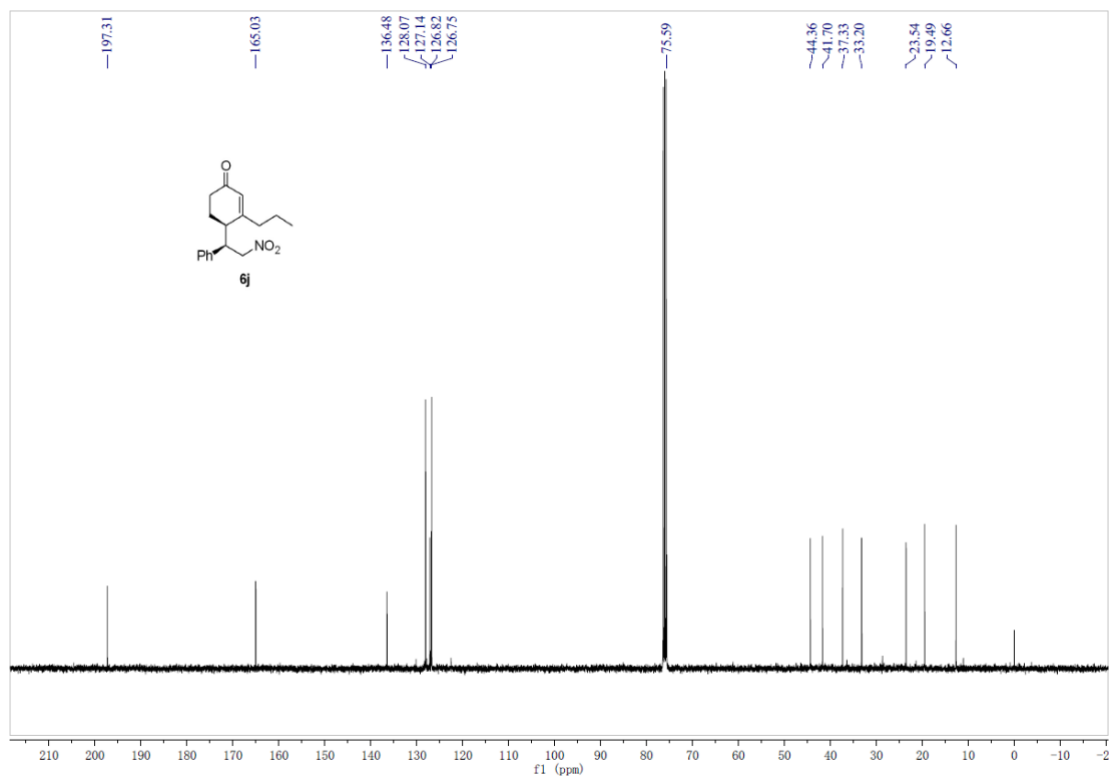

**6k: (R)-3-butyl-4-((R)-2-nitro-1-phenylethyl)cyclohex-2-en-1-one**

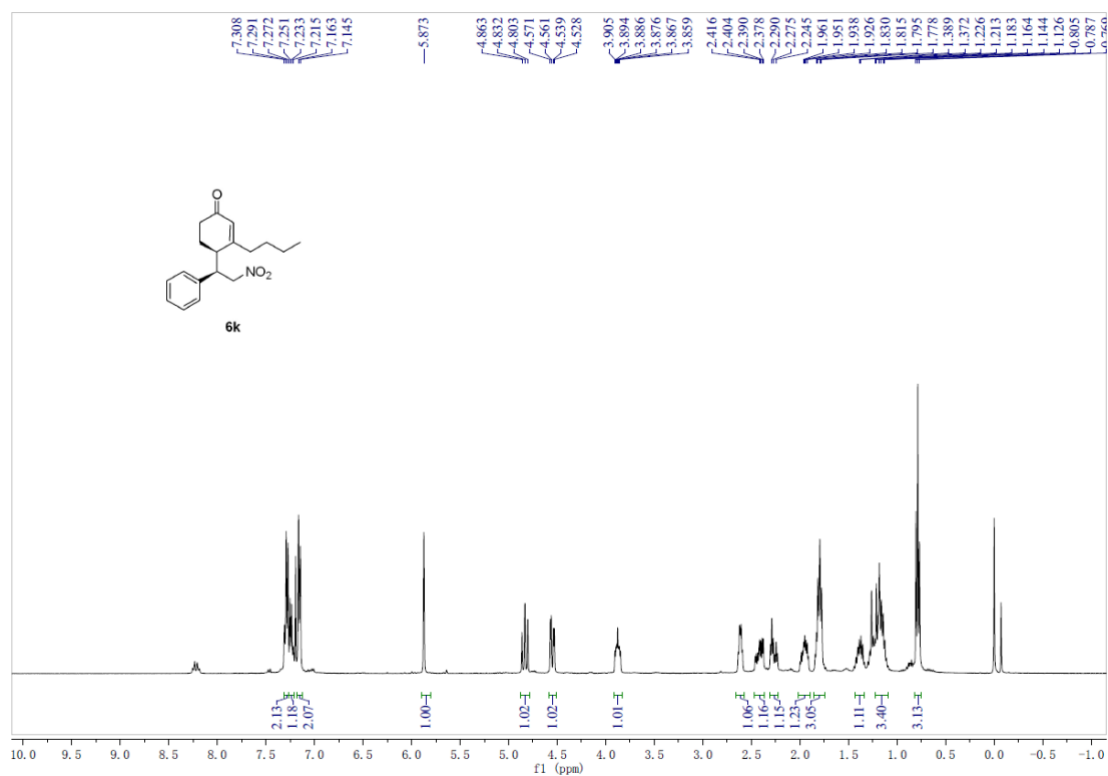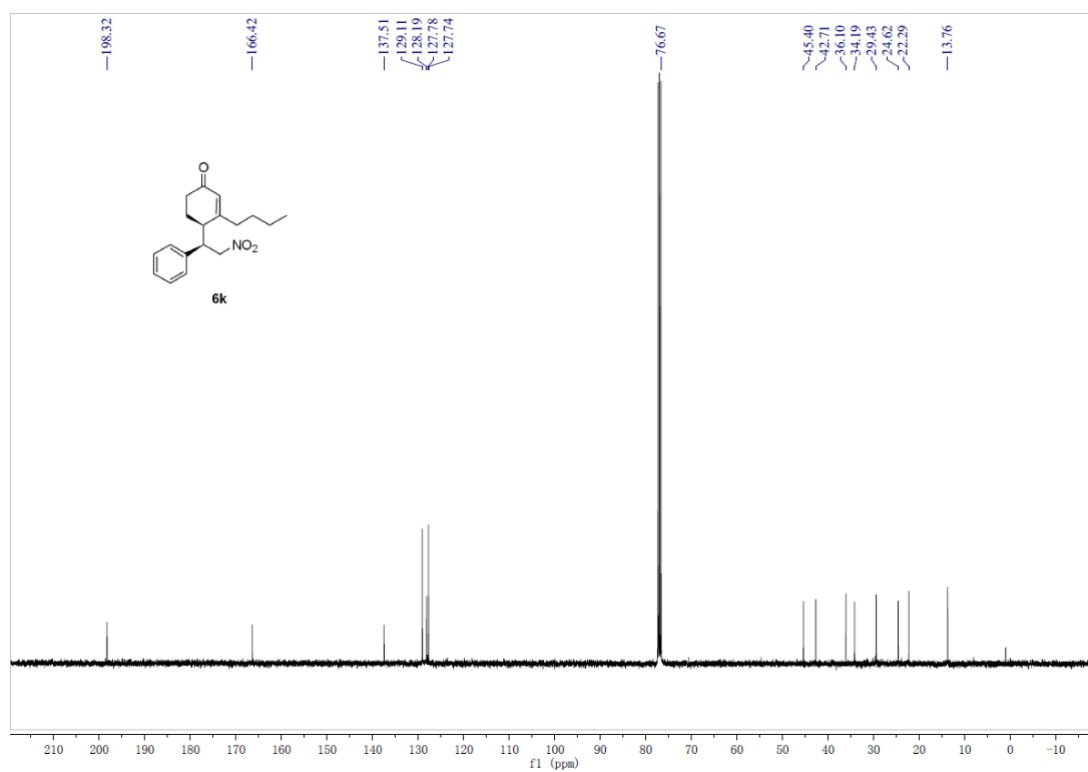

**6l: (R)-4-((R)-2-nitro-1-phenylethyl)-3-pentylcyclohex-2-en-1-one**

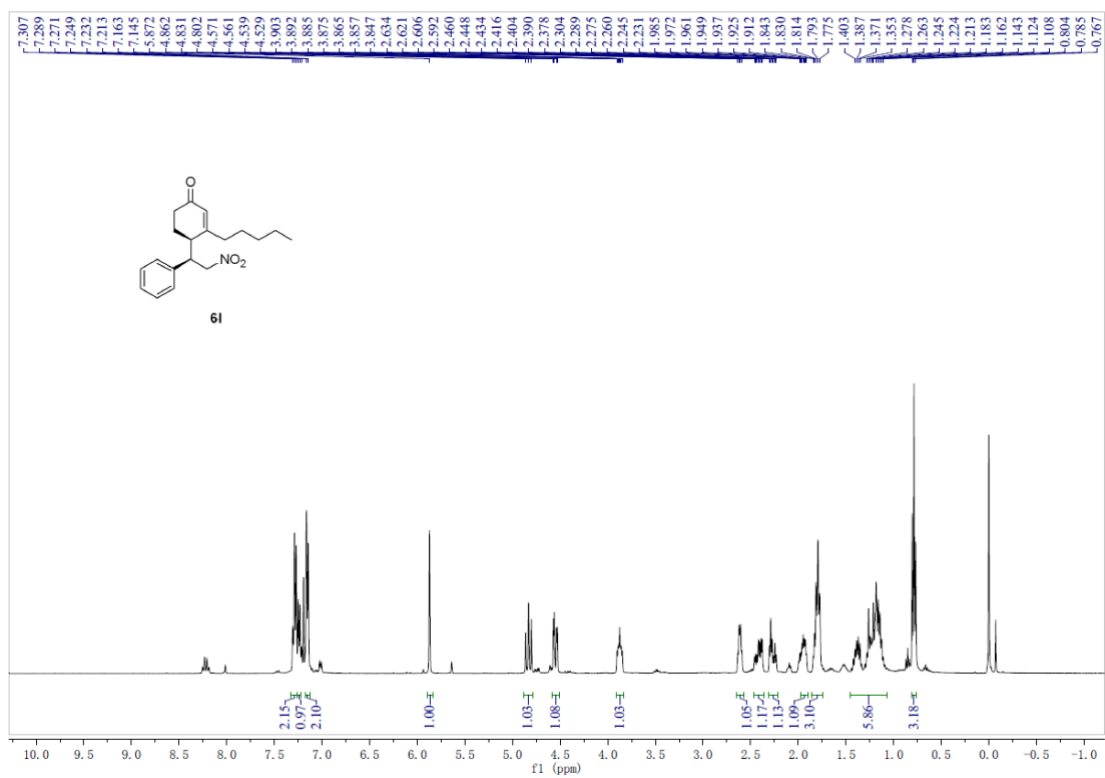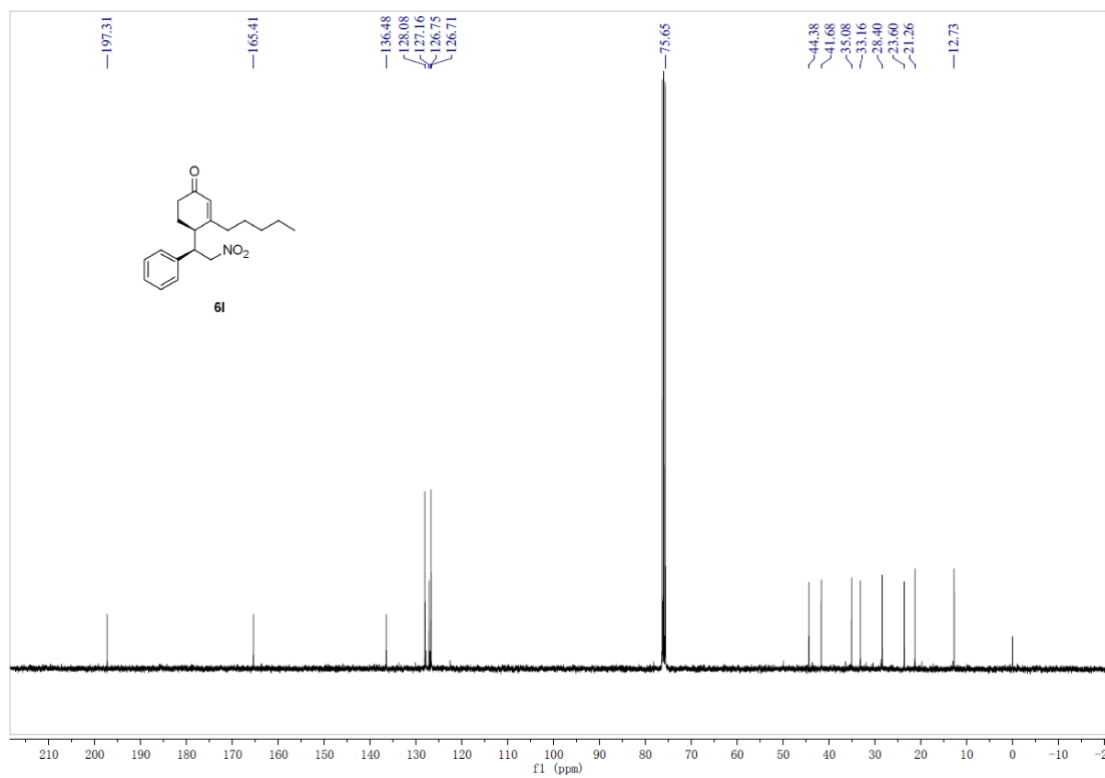

**6m: (R)-3-hexyl-4-((R)-2-nitro-1-phenylethyl)cyclohex-2-en-1-one**

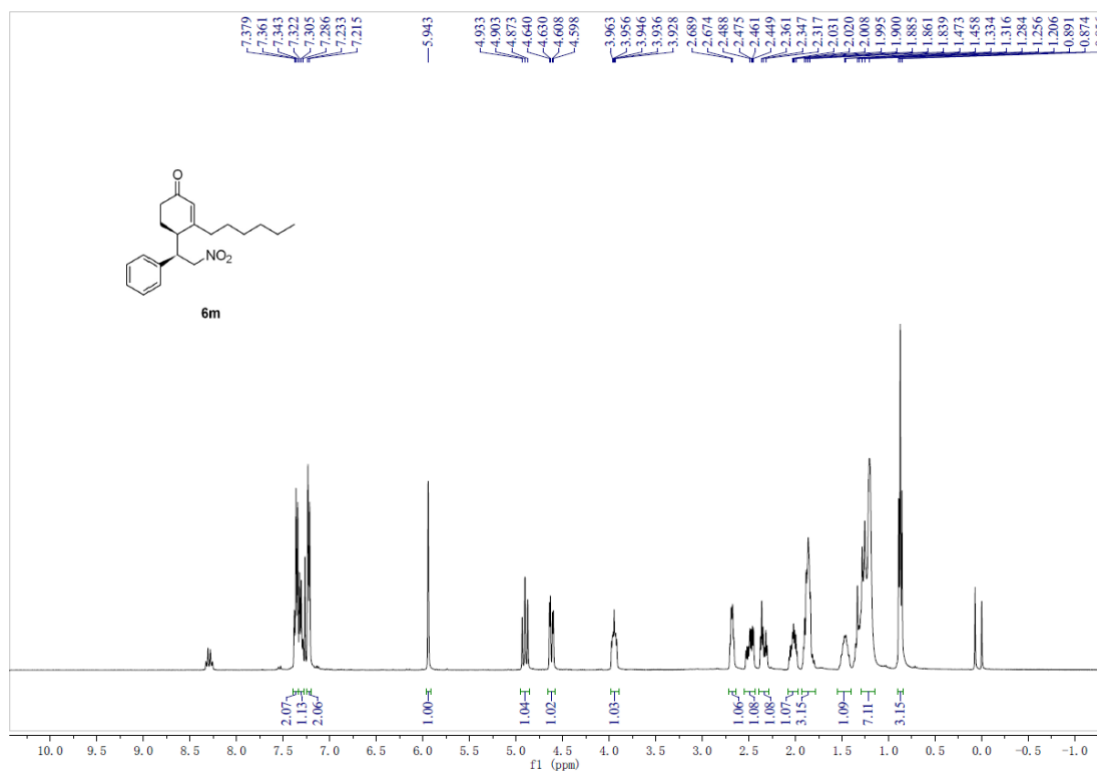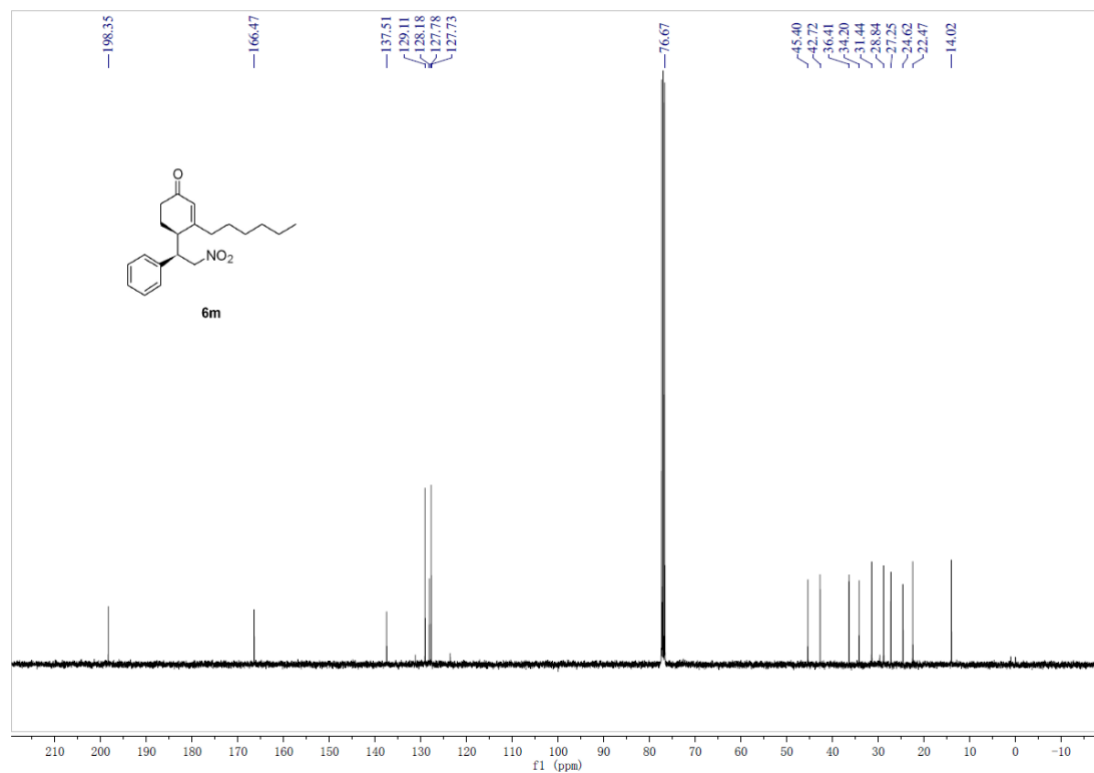

**6n: (R)-3-benzyl-4-((R)-2-nitro-1-phenylethyl)cyclohex-2-en-1-one**

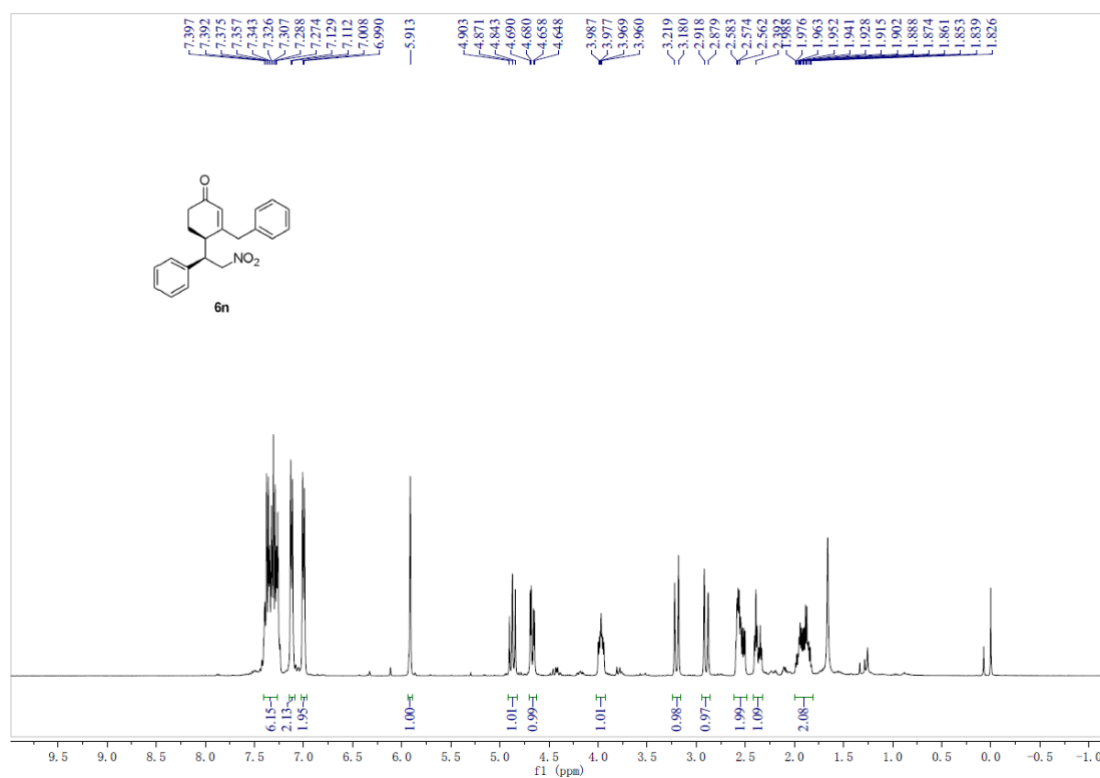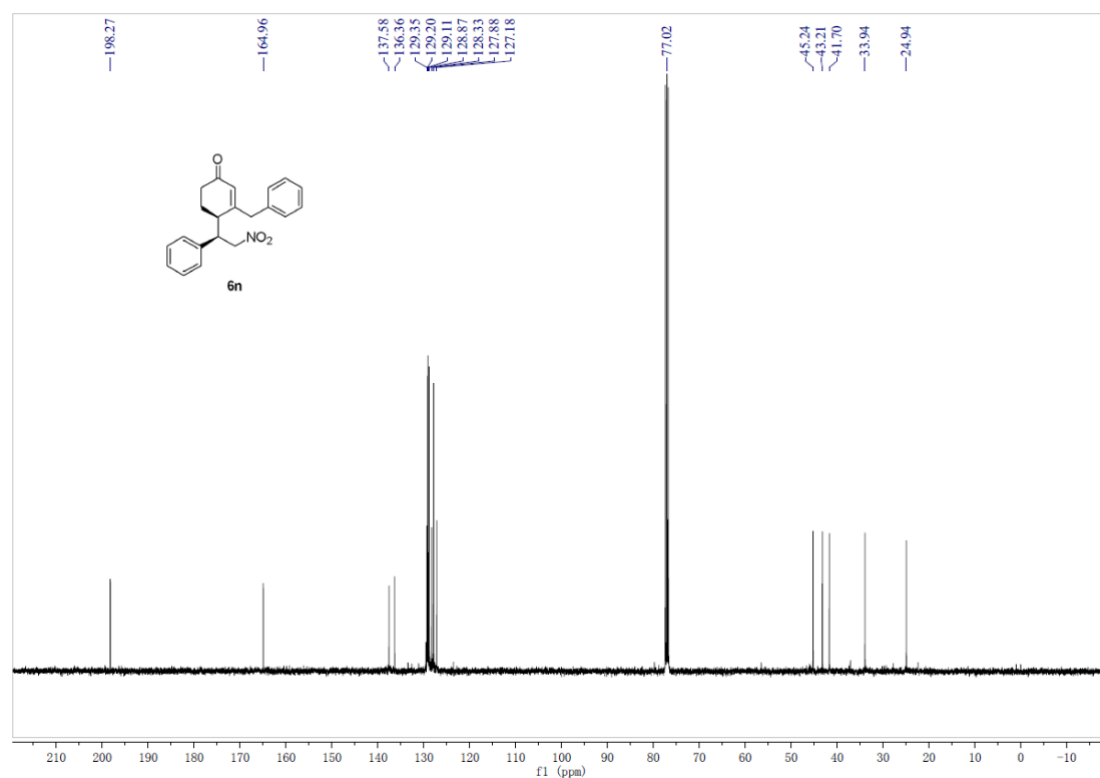

**6o: (R)-4-((R)-2-nitro-1-phenylethyl)-3-phenethylcyclohex-2-en-1-one**

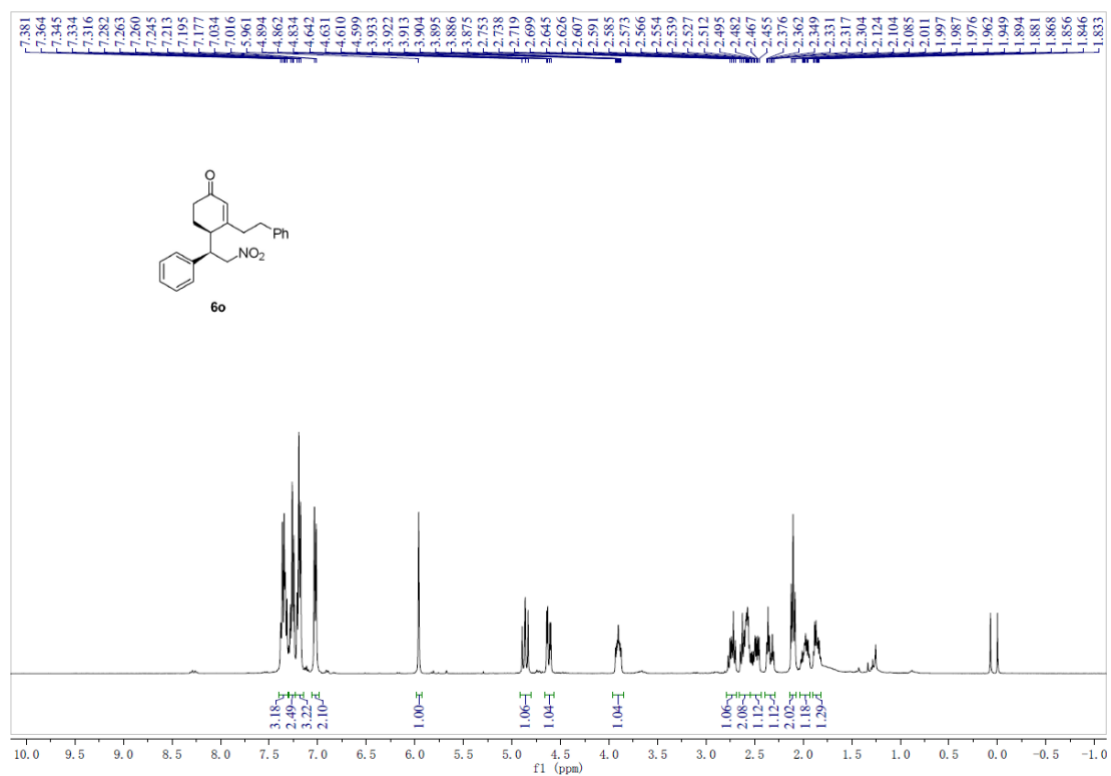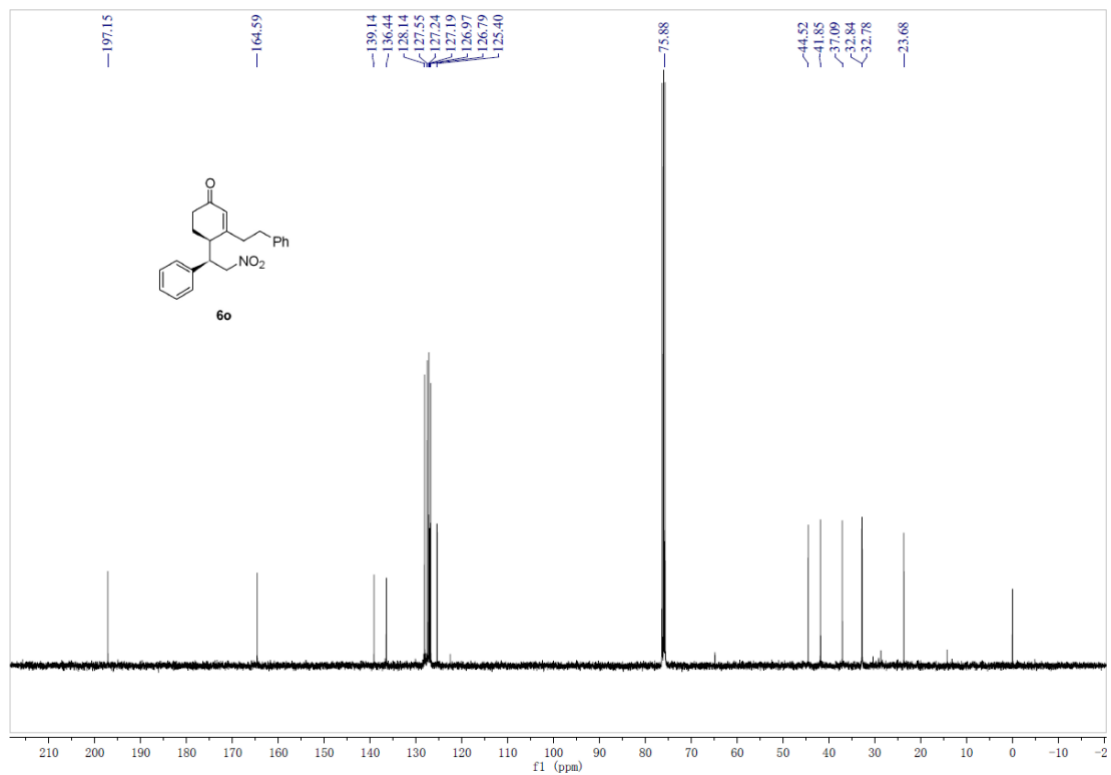



**6p: (R)-4-((R)-1-(4-bromophenyl)-2-nitroethyl)-3-pentylcyclohex-2-en-1-one**

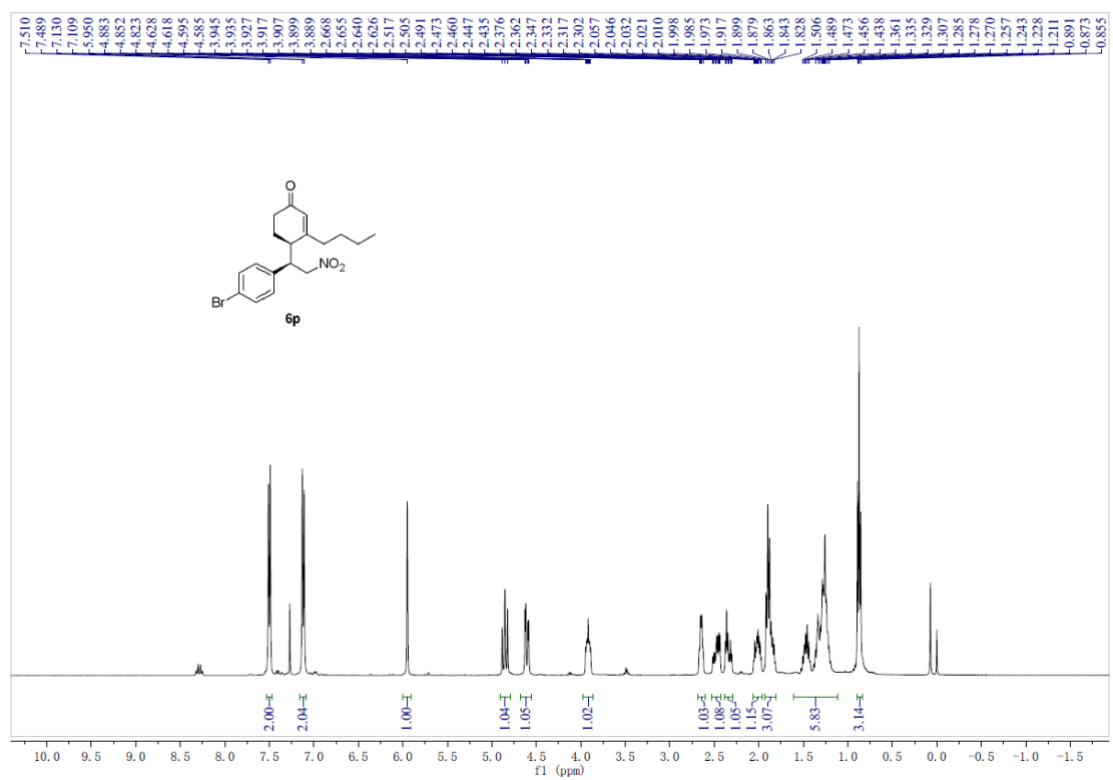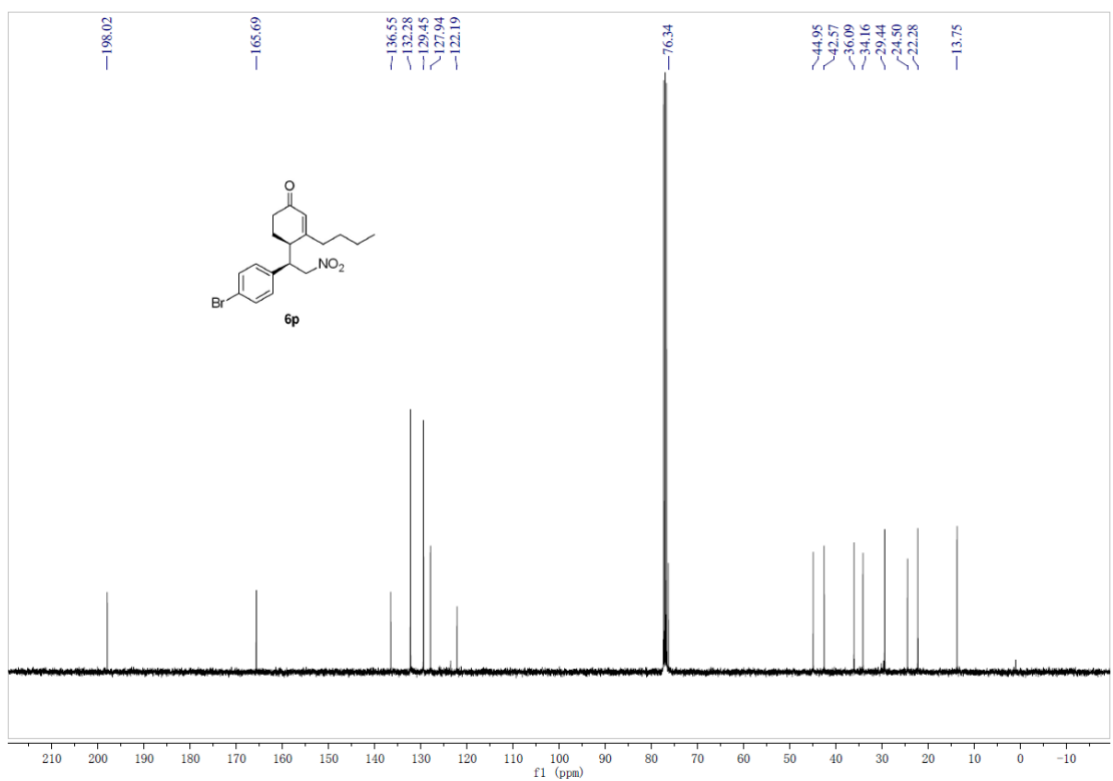

**6q: (R)-6-((R)-2-nitro-1-phenylethyl)-5,6-dihydro-[1,1'-biphenyl]-3(4H)-one**

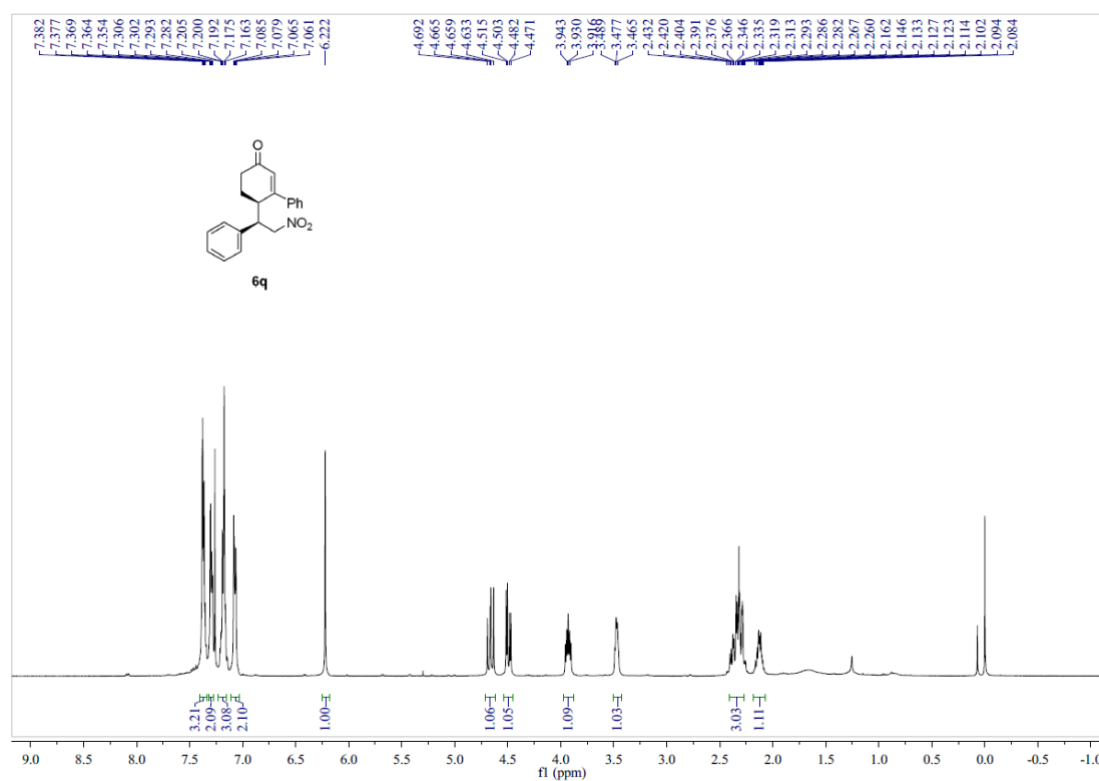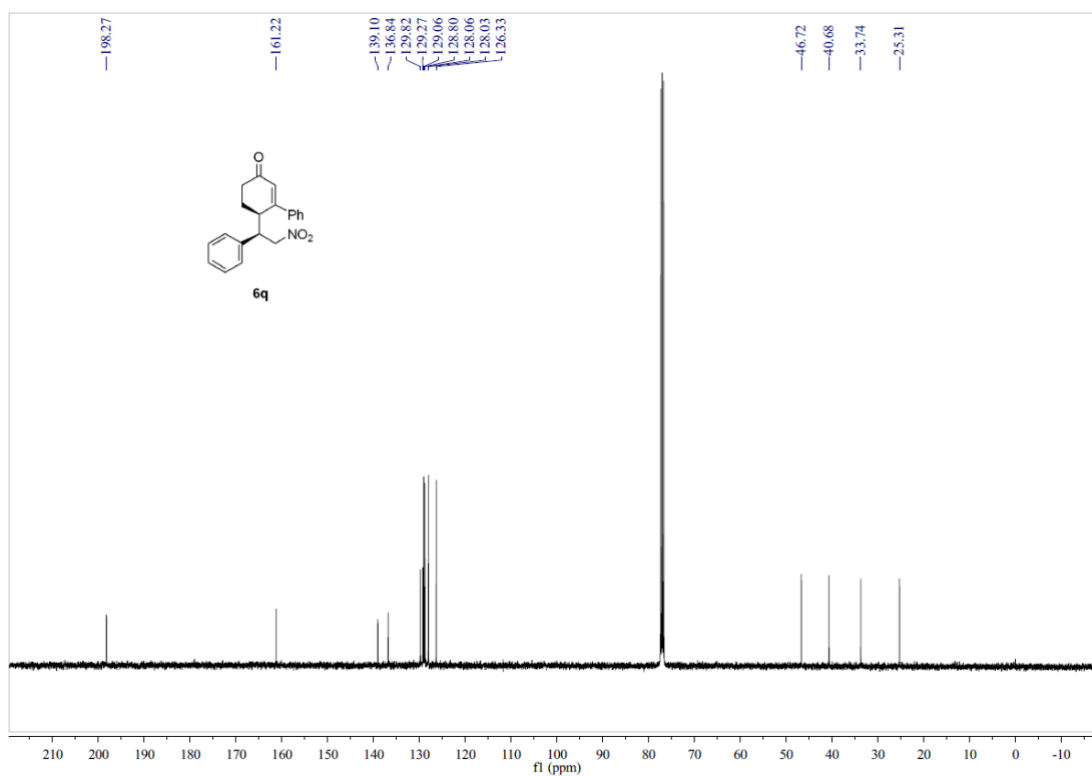

**6r: (R)-3',5'-dimethoxy-6-((R)-2-nitro-1-phenylethyl)-5,6-dihydro-[1,1'-biphenyl]-3(4H)-one**

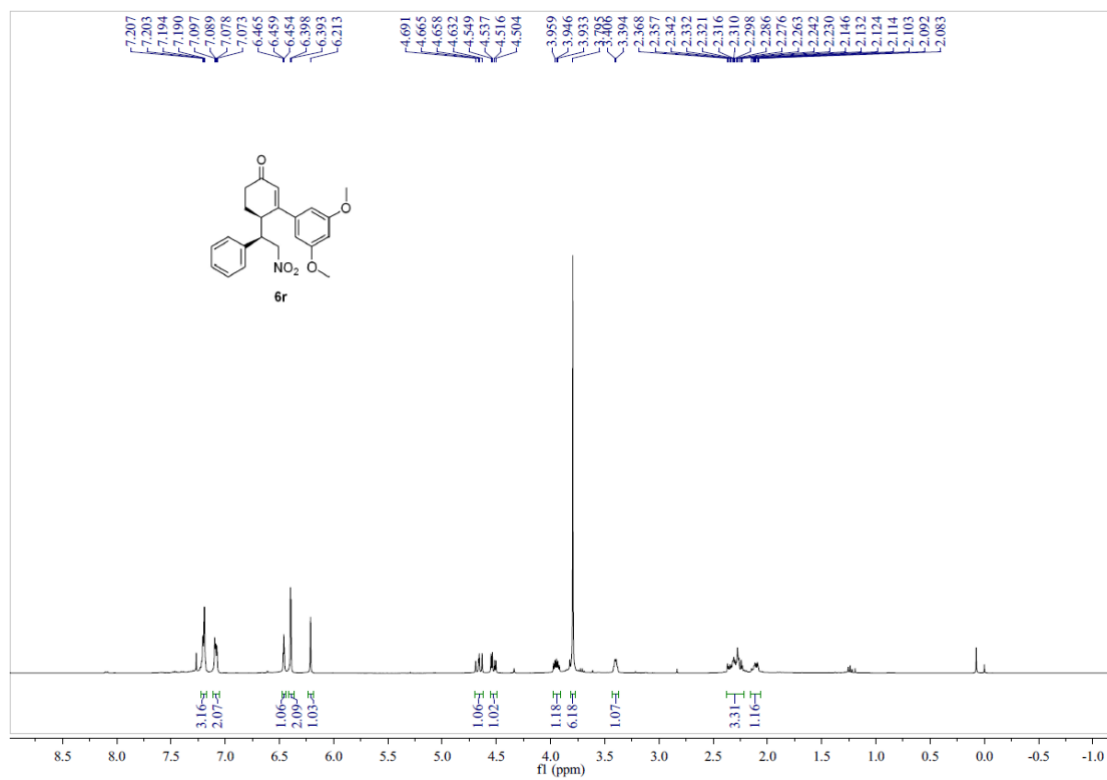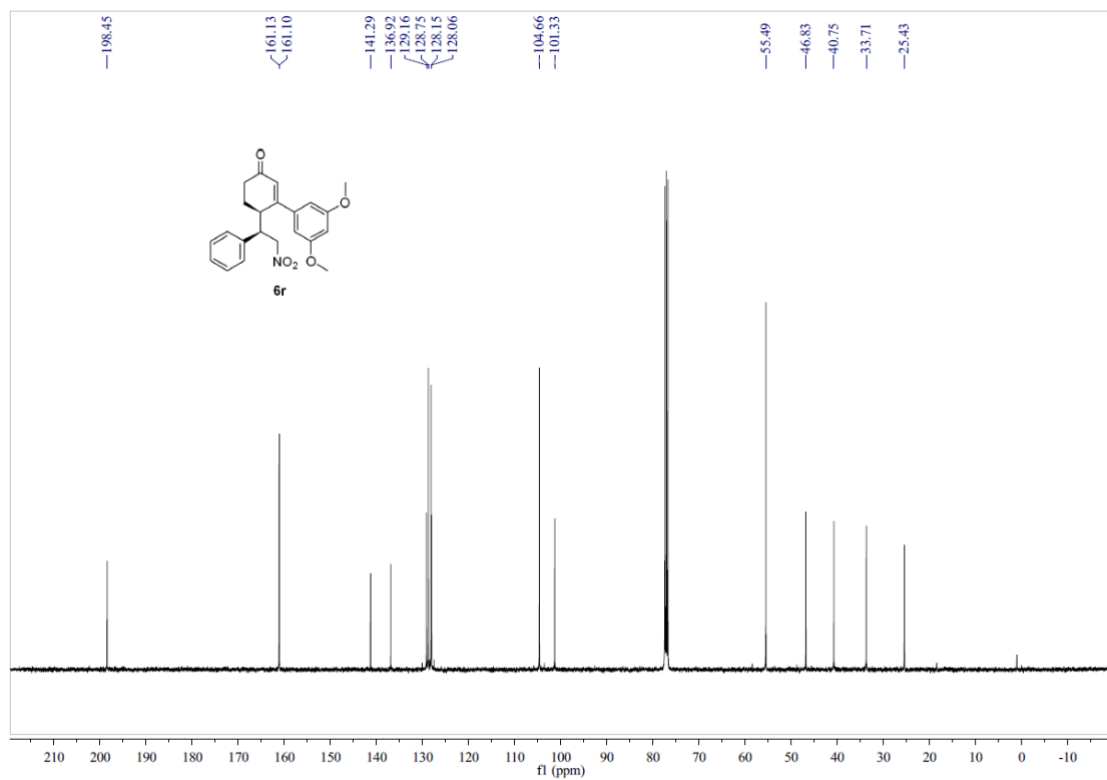

**6s: (S)-6-((R)-2-nitro-1-phenylethyl)-3',5'-bis(trifluoromethyl)-5,6-dihydro-[1,1'-biphenyl]-3(4H)-one**

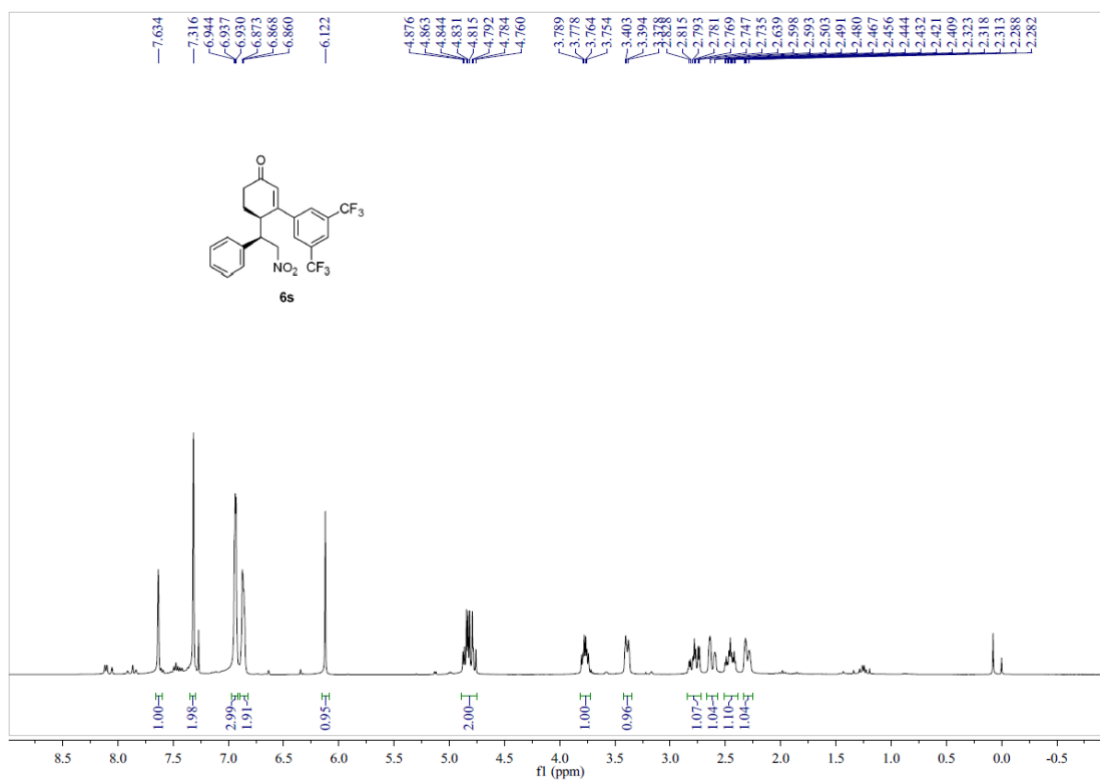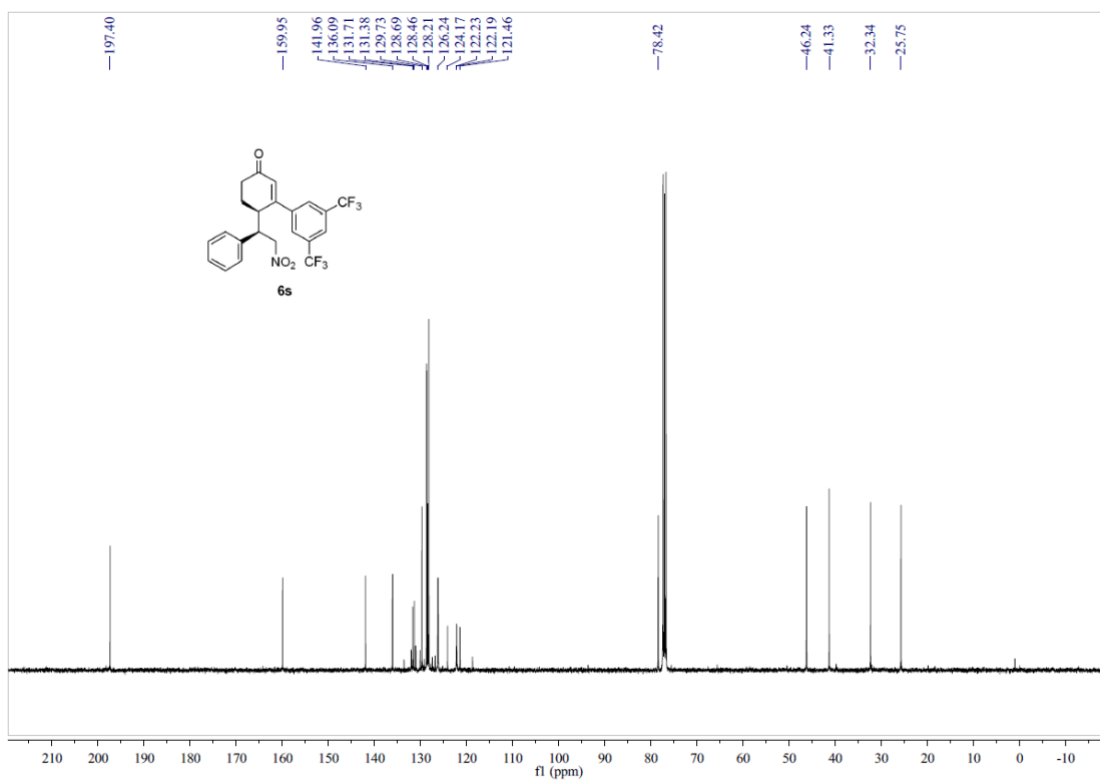

**6t: (R)-6-((R)-1-(4-bromophenyl)-2-nitroethyl)-5,6-dihydro-[1,1'-biphenyl]-3(4H)-one**

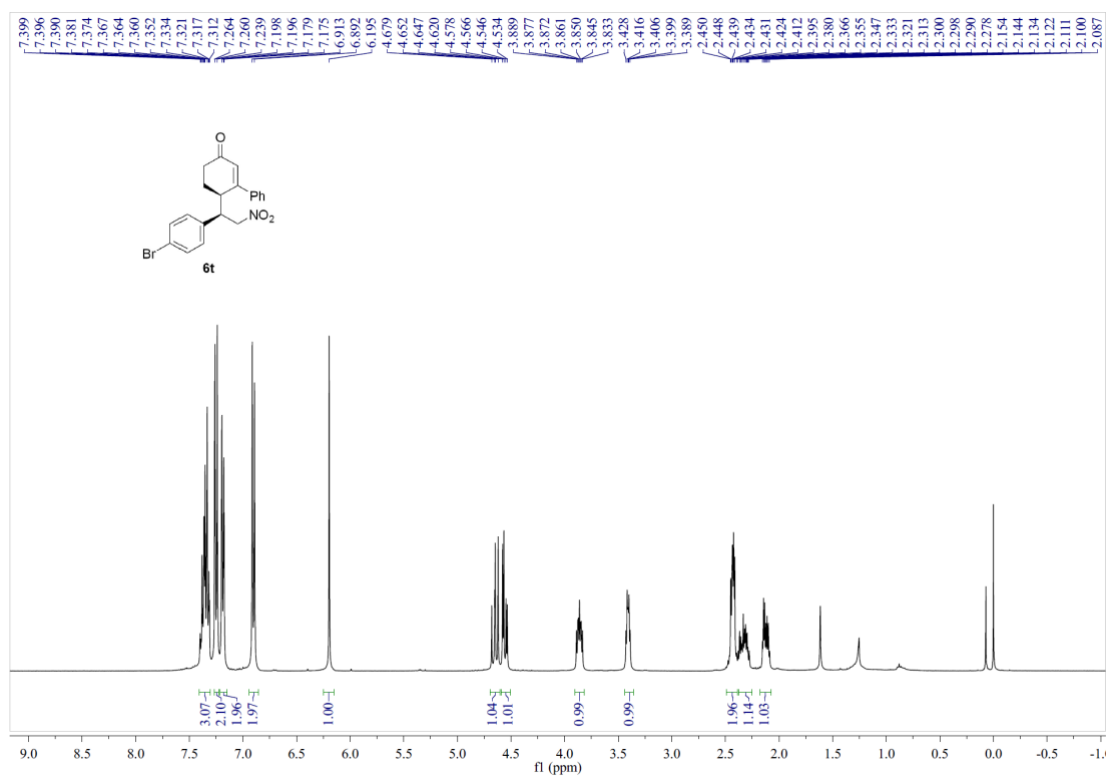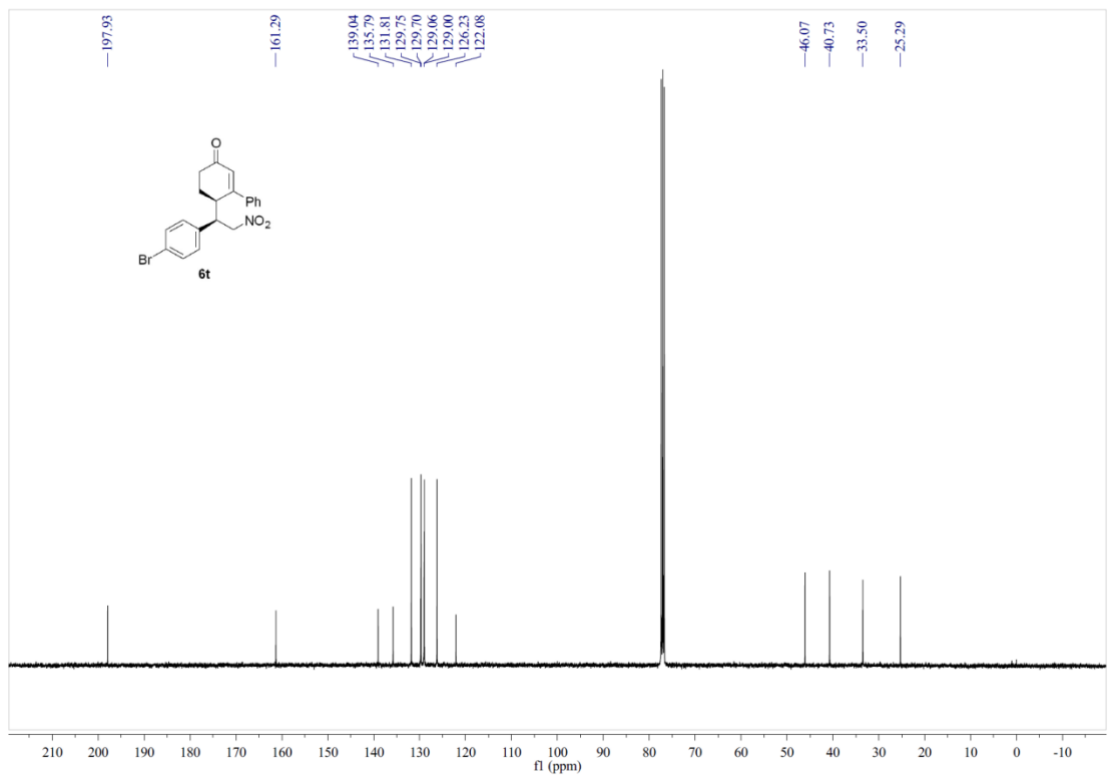

**6u: (R)-4-((R)-2-nitro-1-phenylethyl)-3-(phenylethynyl)cyclohex-2-en-1-one**

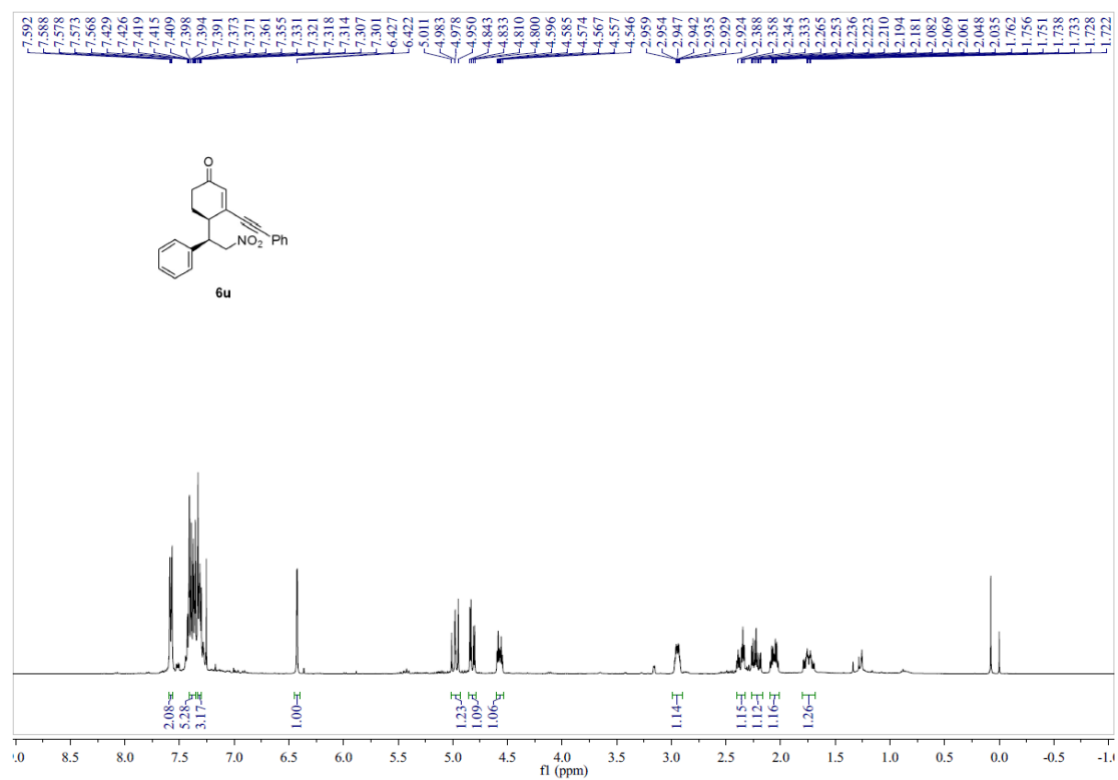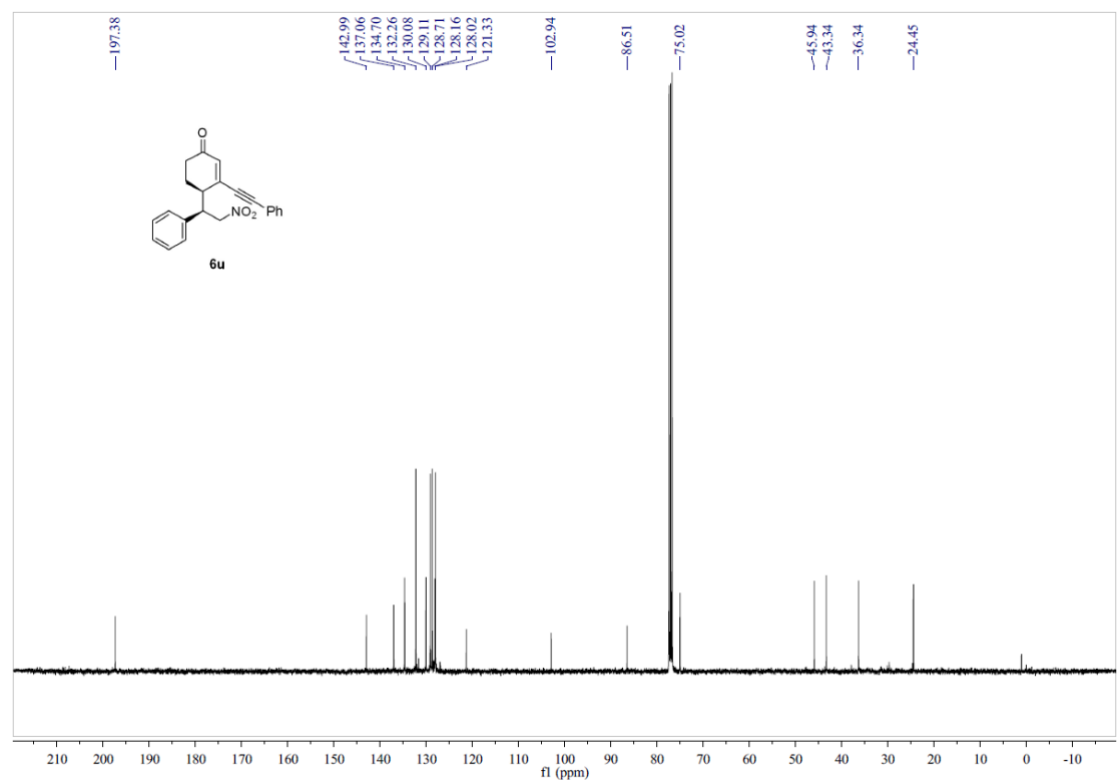

**7a: (S)-3-ethyl-4-((R)-2-nitro-1-phenylethyl)cyclohex-2-en-1-one**

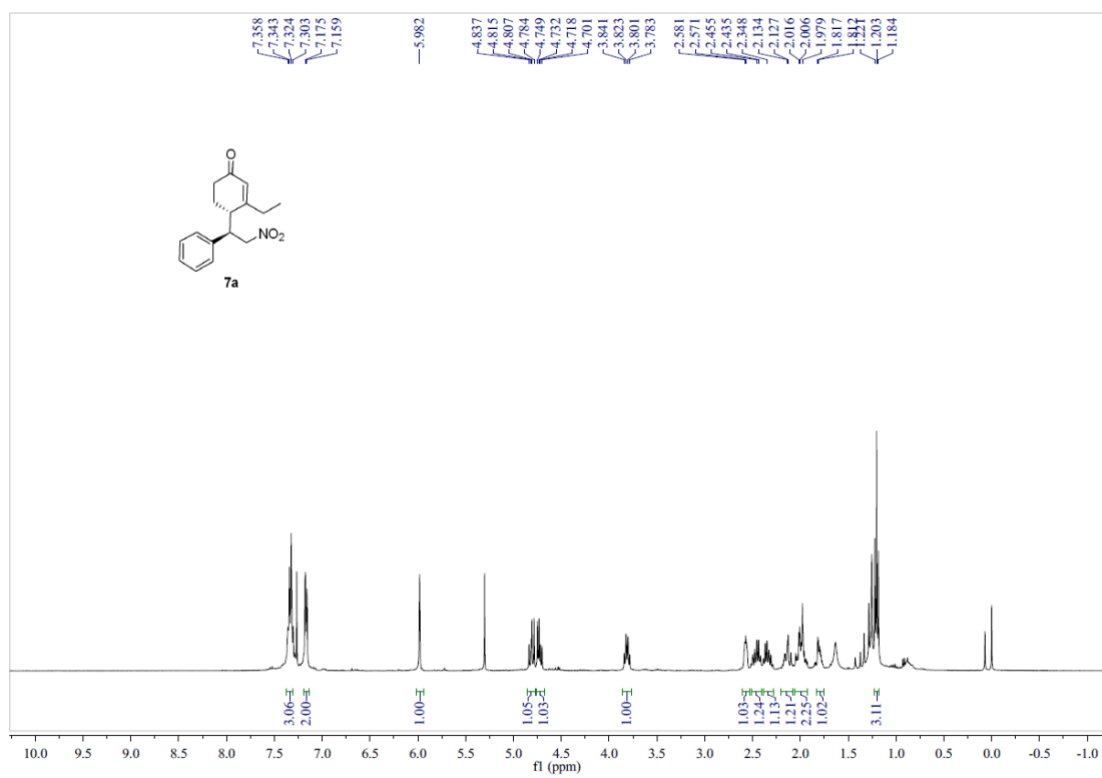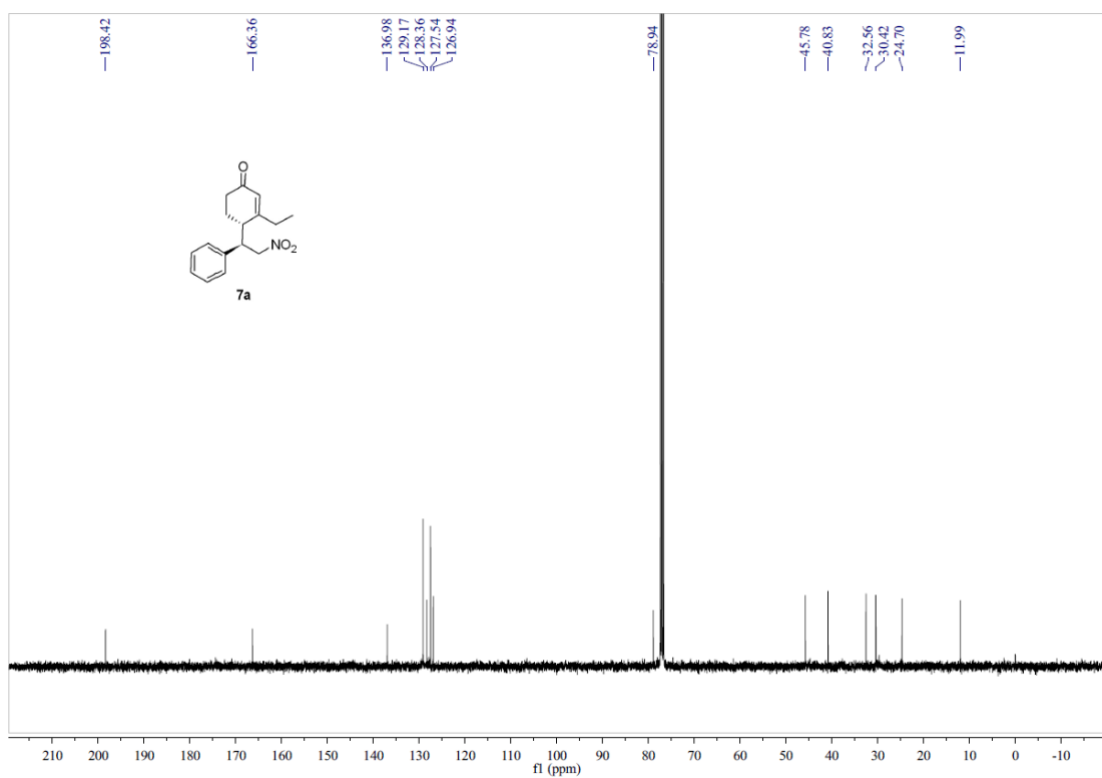

**7c: (S)-3-ethyl-4-((R)-1-(4-methoxyphenyl)-2-nitroethyl)cyclohex-2-en-1-one**

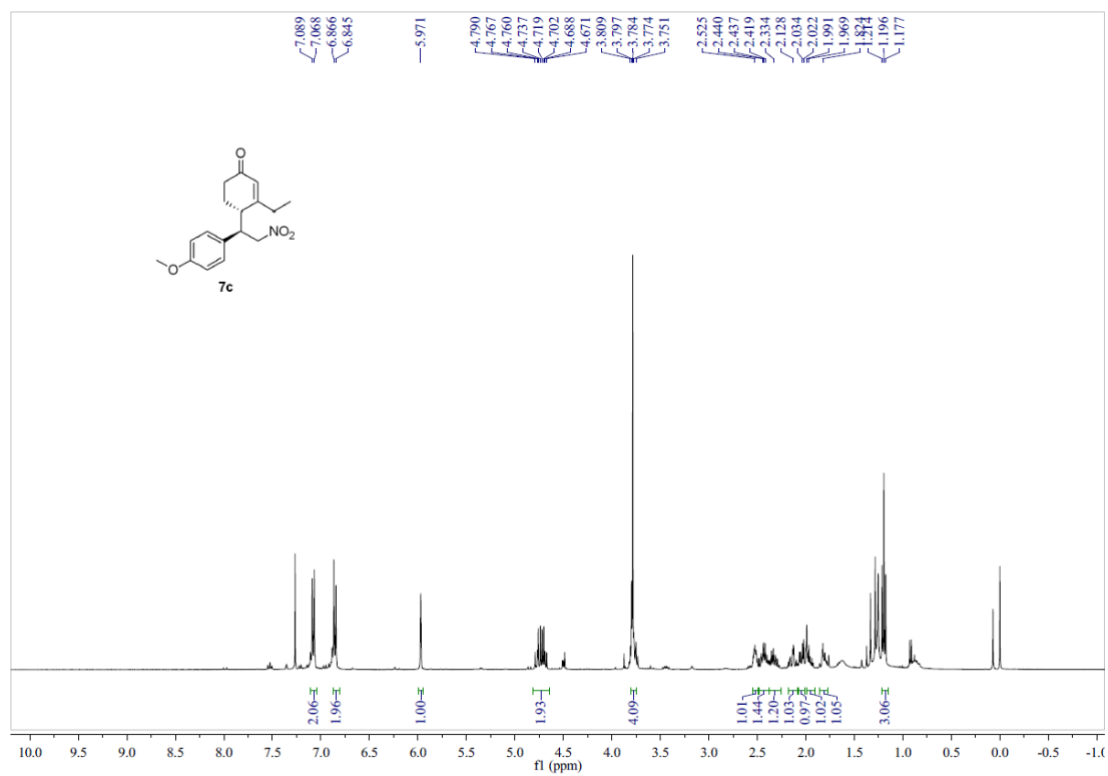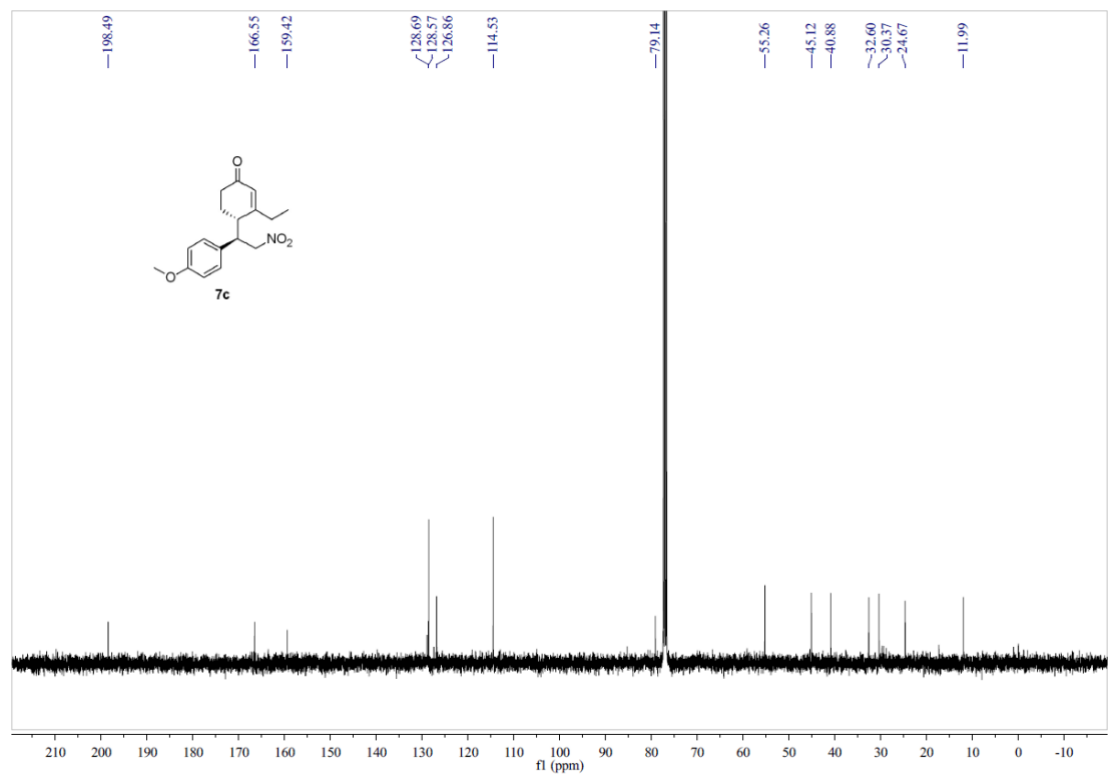



**7d: (S)-3-ethyl-4-((R)-1-(4-fluorophenyl)-2-nitroethyl)cyclohex-2-en-1-one**

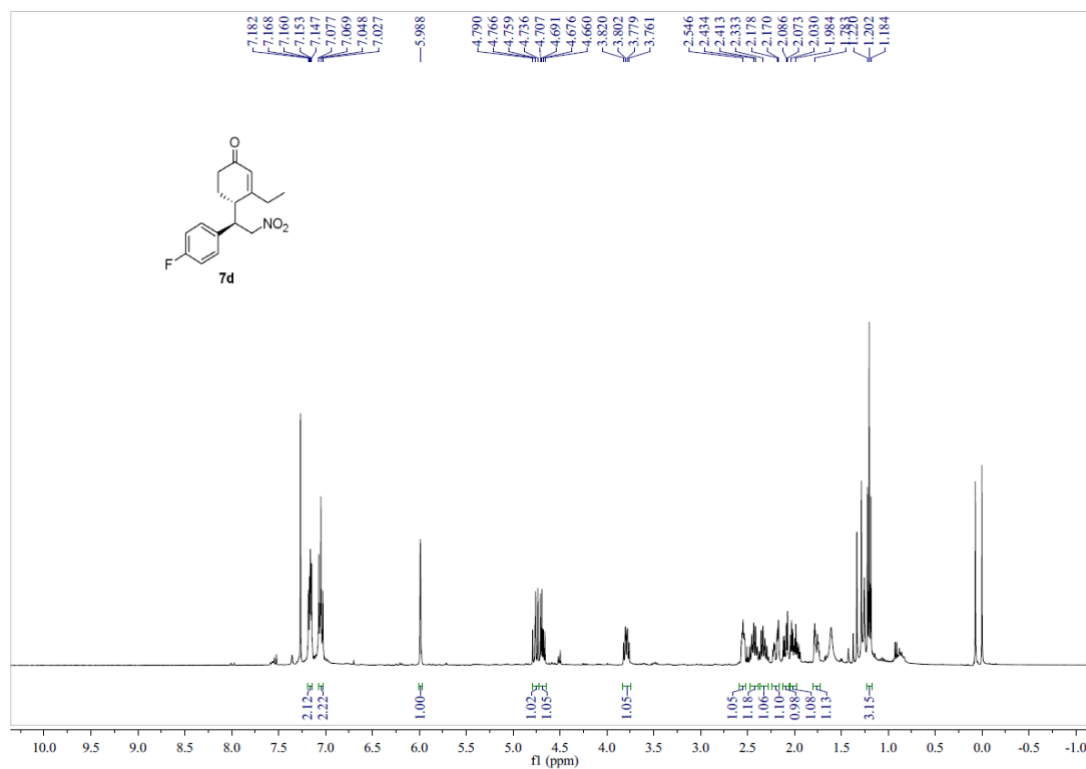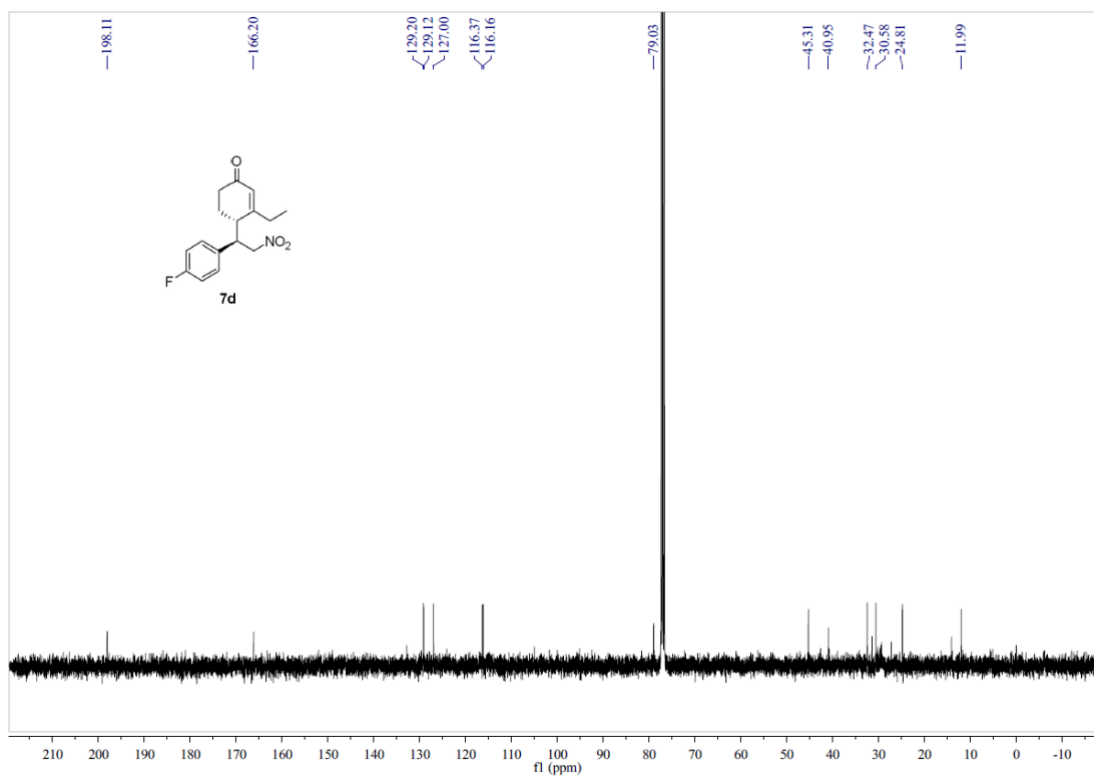

**7e: (S)-4-((R)-1-(4-chlorophenyl)-2-nitroethyl)-3-ethylcyclohex-2-en-1-one**

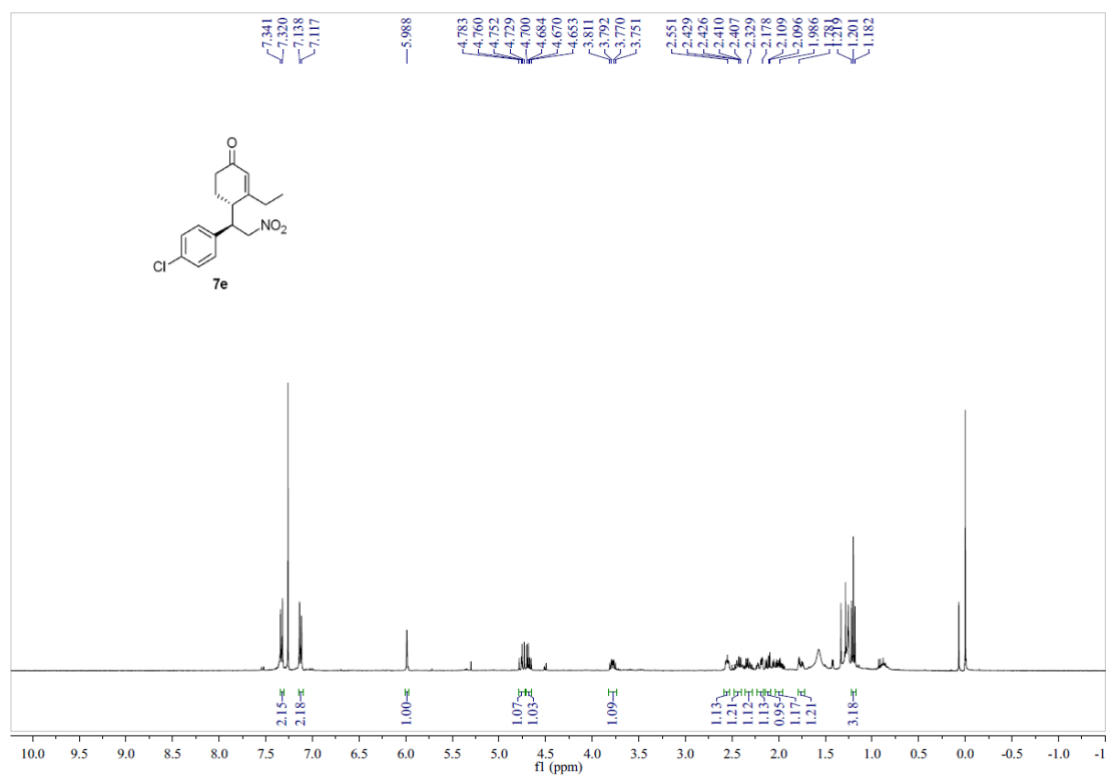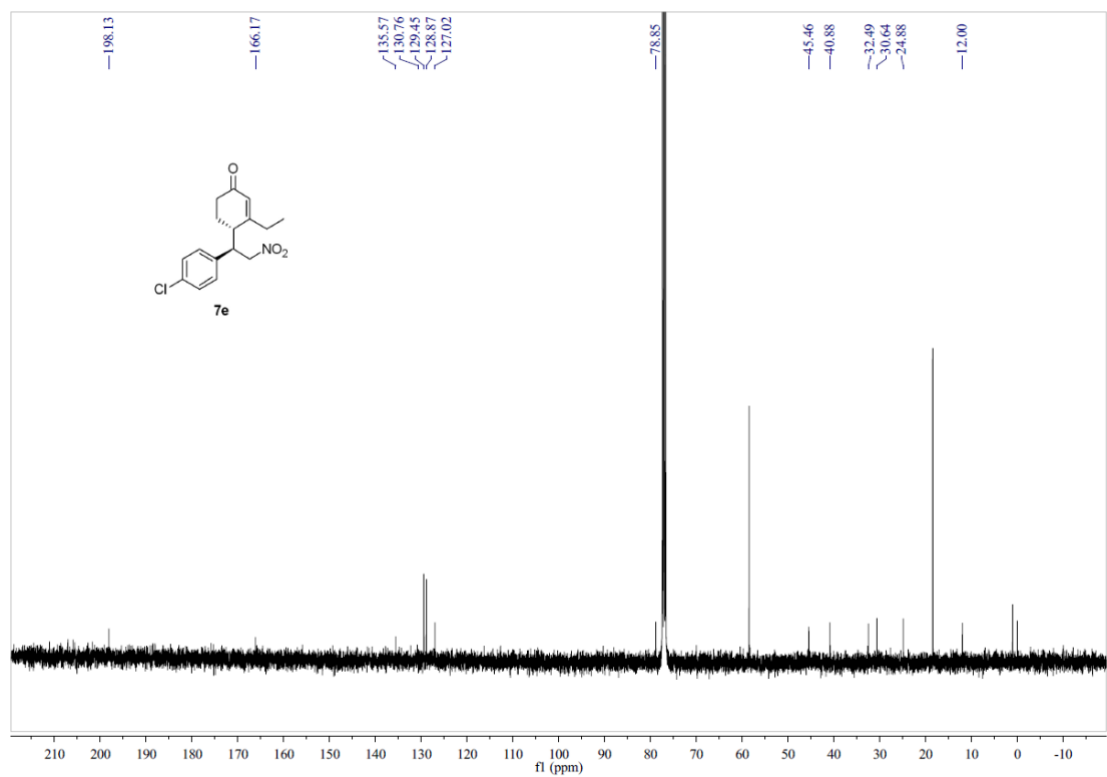

**7f: (S)-4-((R)-1-(4-bromophenyl)-2-nitroethyl)-3-ethylcyclohex-2-en-1-one**

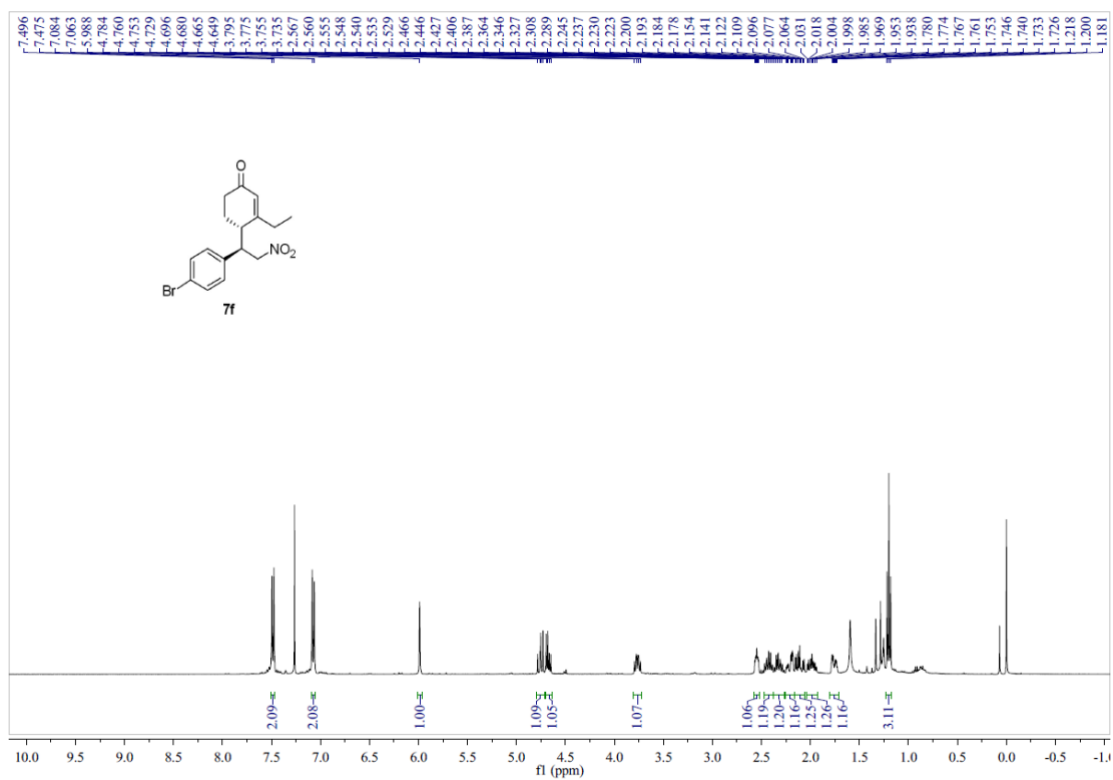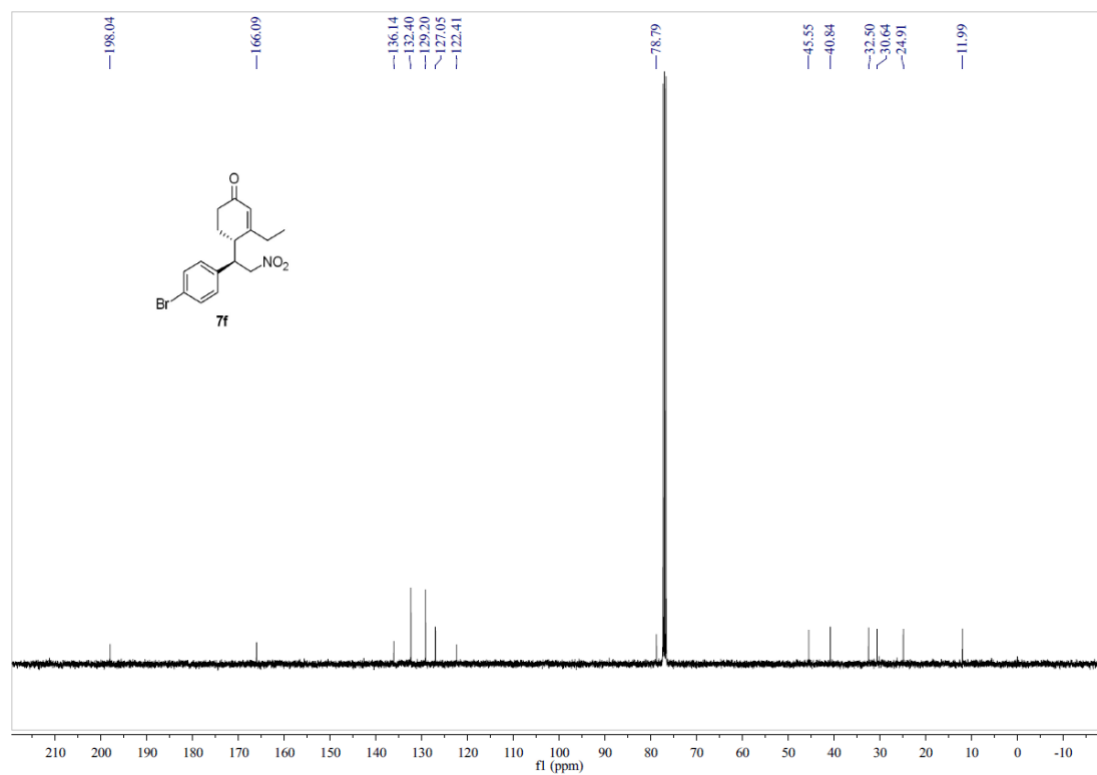

**7h: (S)-3-ethyl-4-((R)-1-(naphthalen-2-yl)-2-nitroethyl)cyclohex-2-en-1-one**

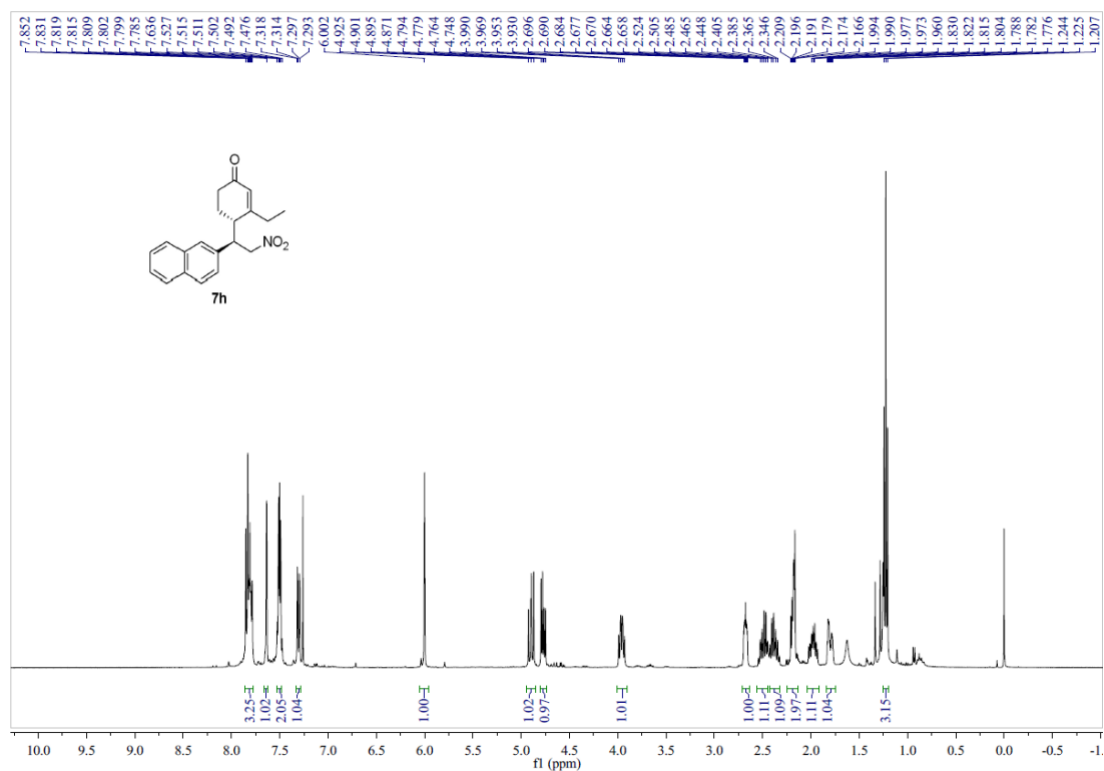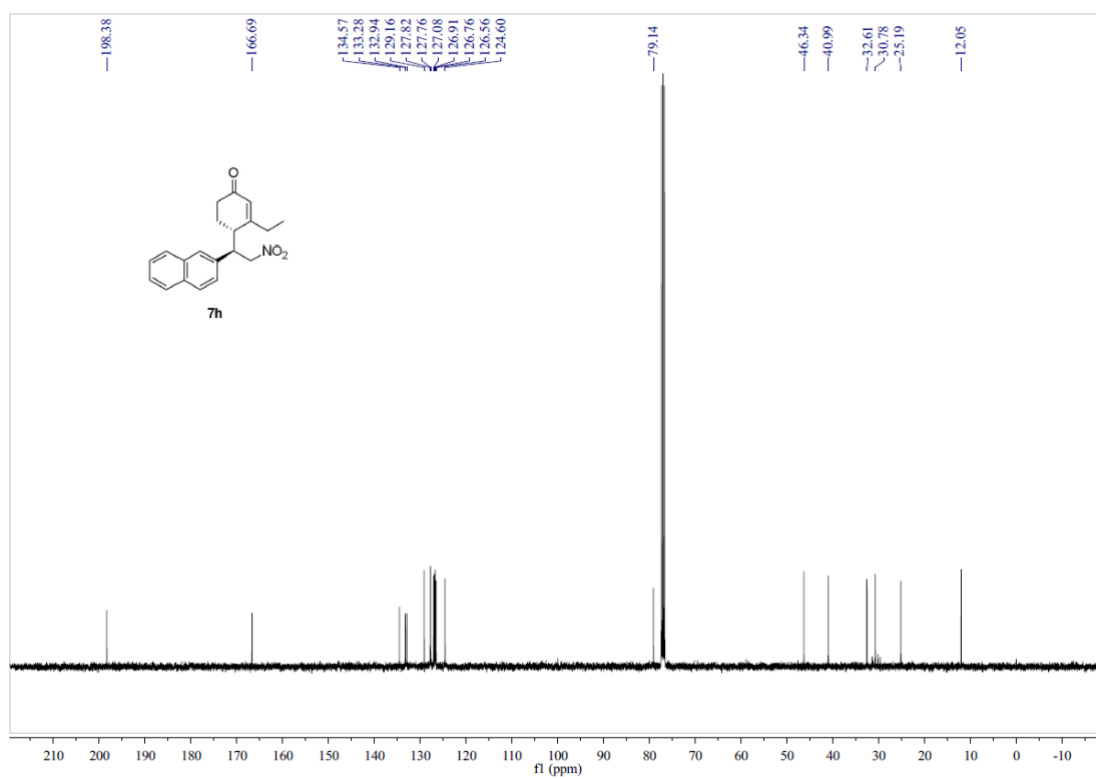

**7i: (S)-3-ethyl-4-((S)-1-(furan-2-yl)-2-nitroethyl)cyclohex-2-en-1-one**

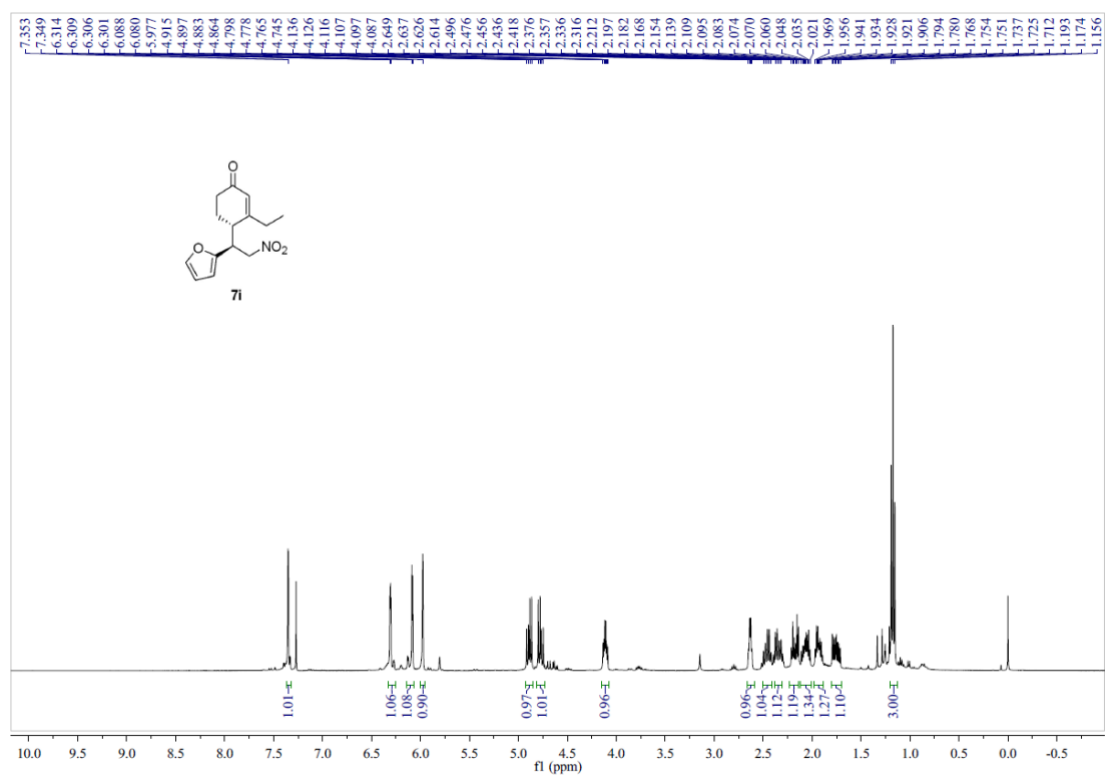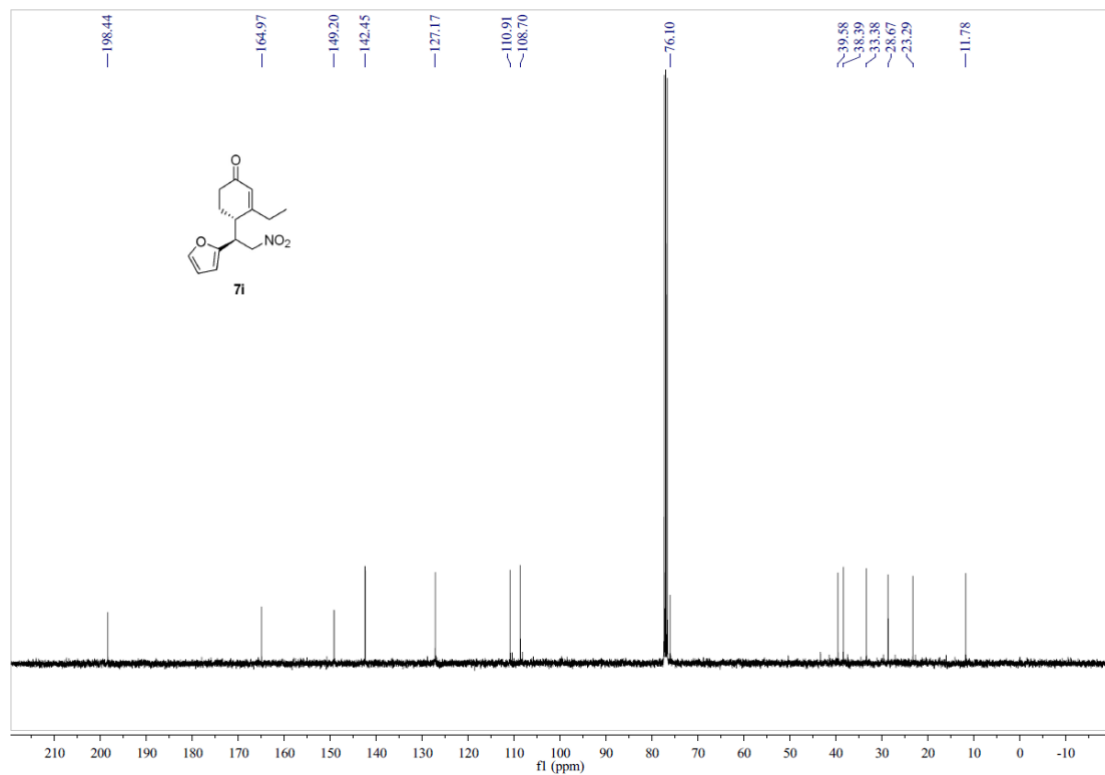

**7j: (S)-4-((R)-2-nitro-1-phenylethyl)-3-propylcyclohex-2-en-1-one**

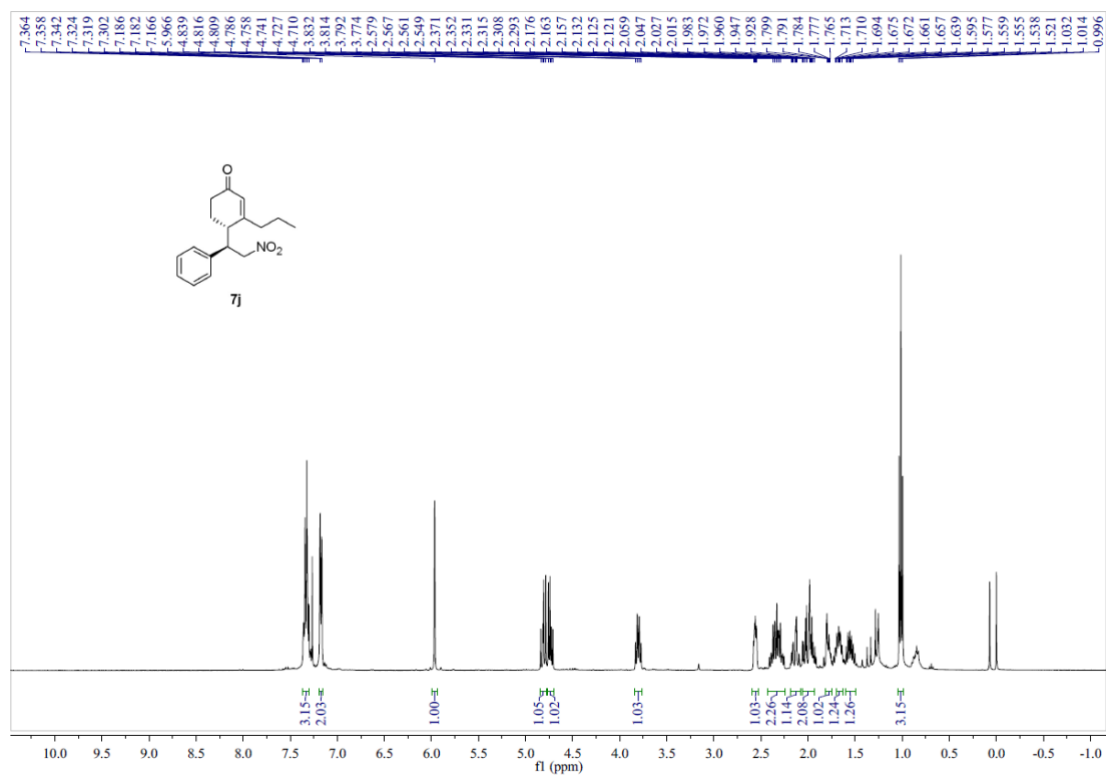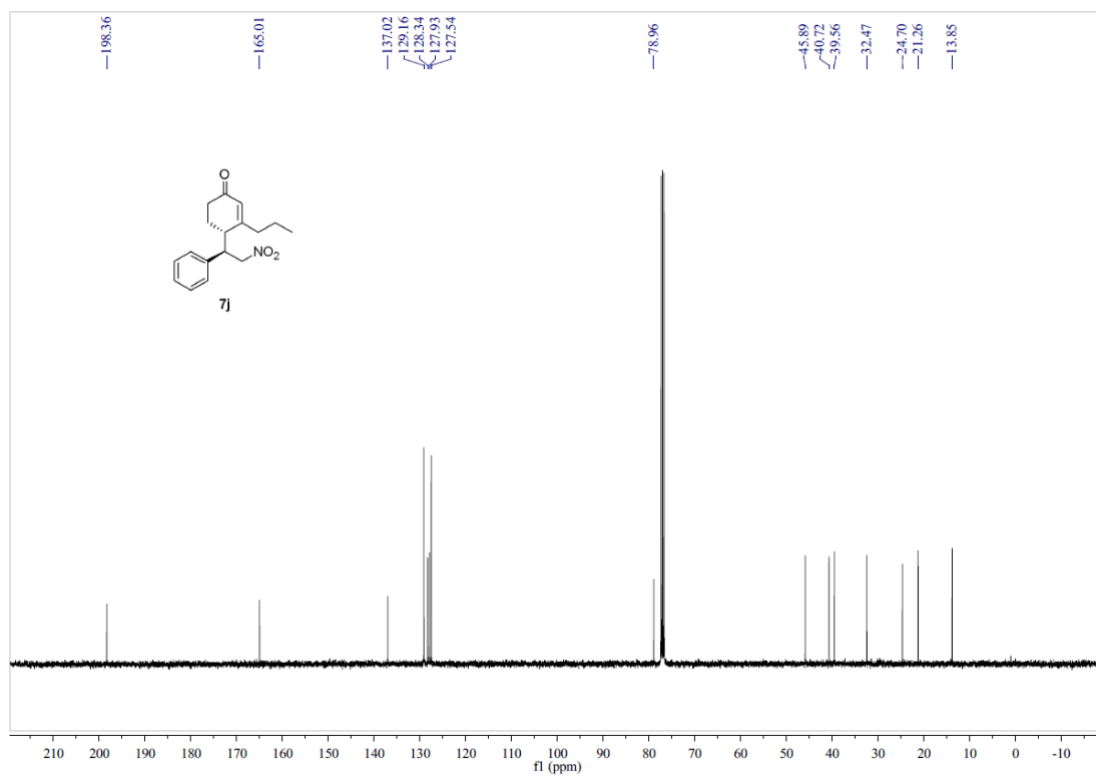

**7k: (S)-3-butyl-4-((R)-2-nitro-1-phenylethyl)cyclohex-2-en-1-one**

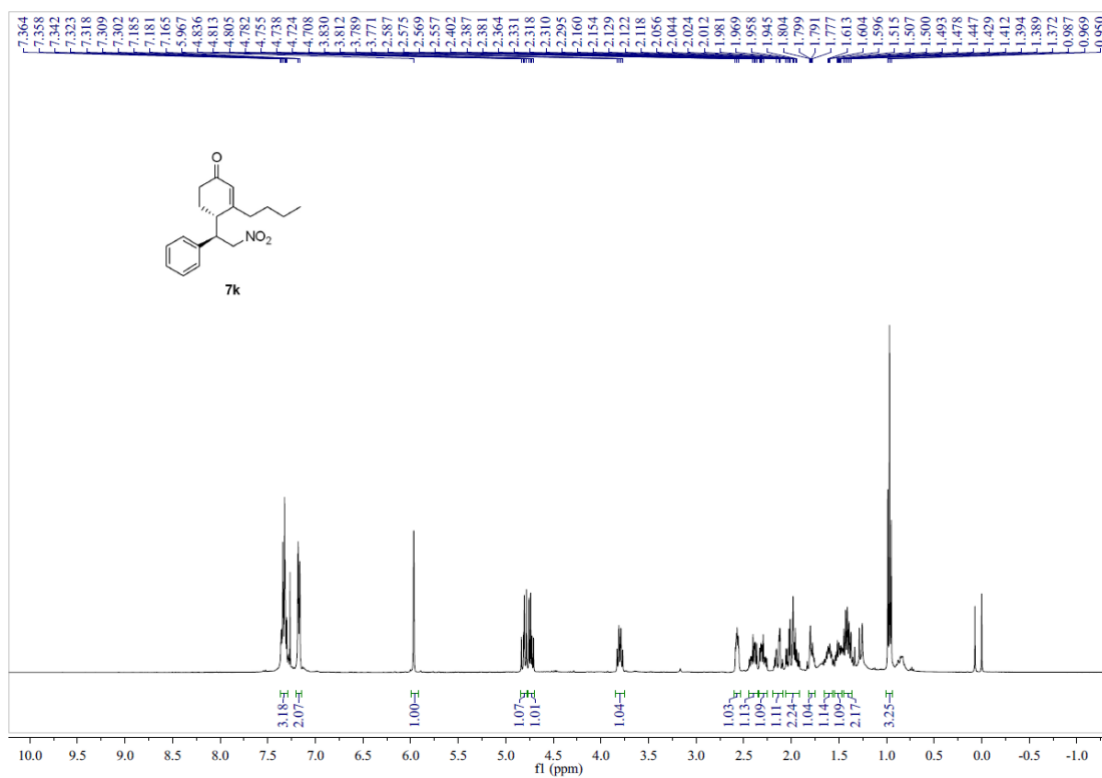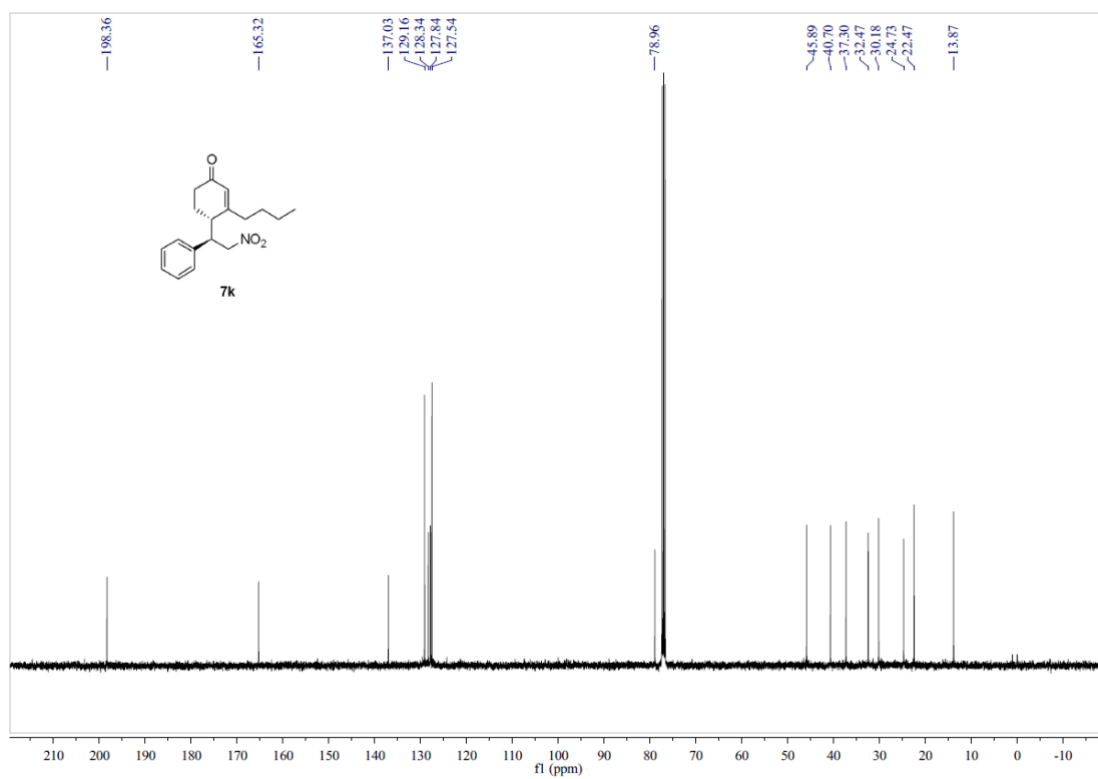

**71: (S)-4-((R)-2-nitro-1-phenylethyl)-3-pentylcyclohex-2-en-1-one**

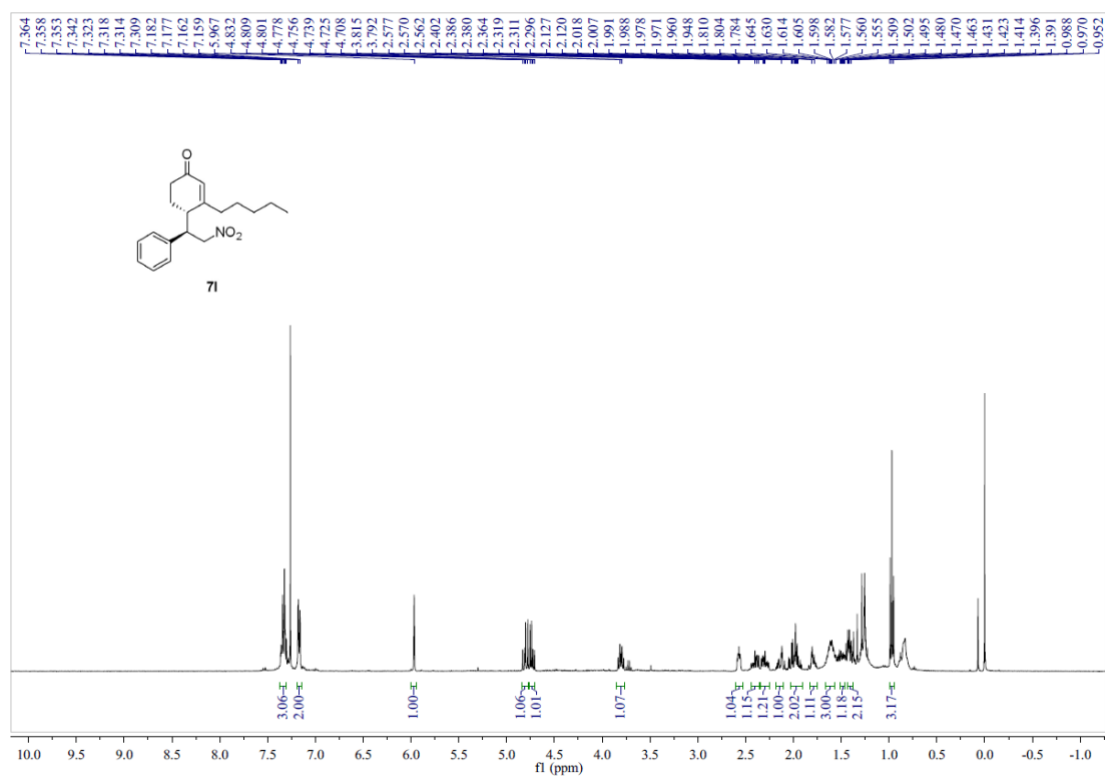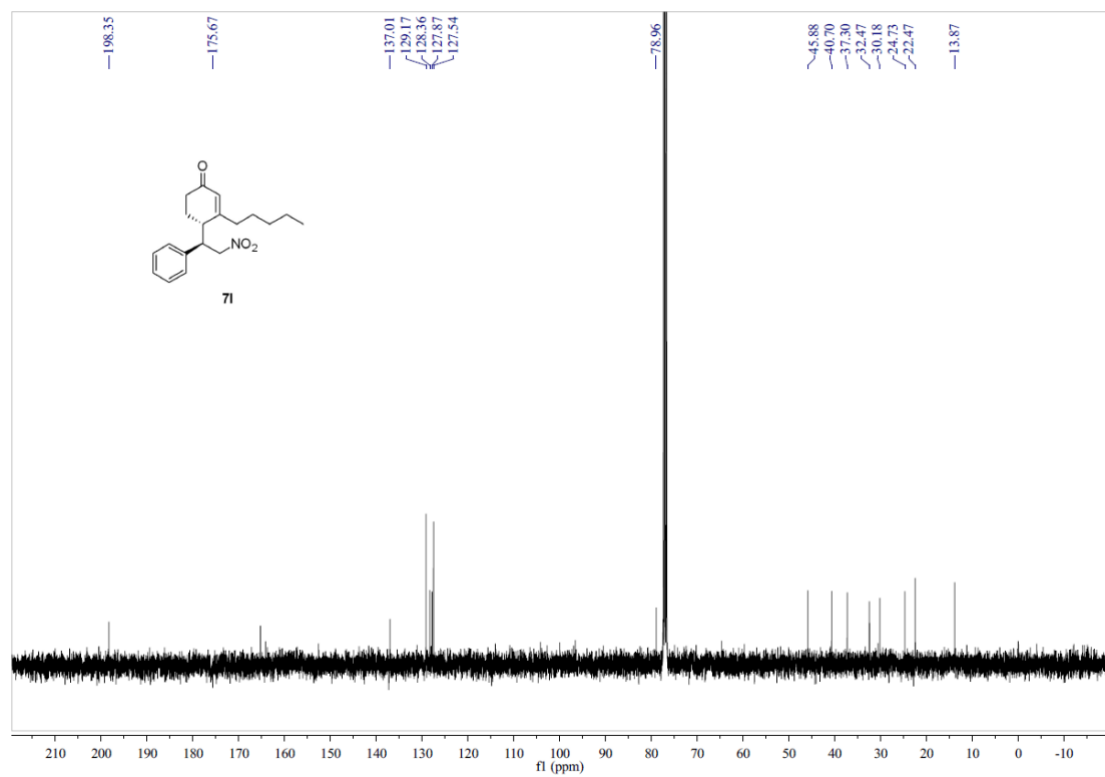



**7m: (S)-3-hexyl-4-((R)-2-nitro-1-phenylethyl)cyclohex-2-en-1-one**

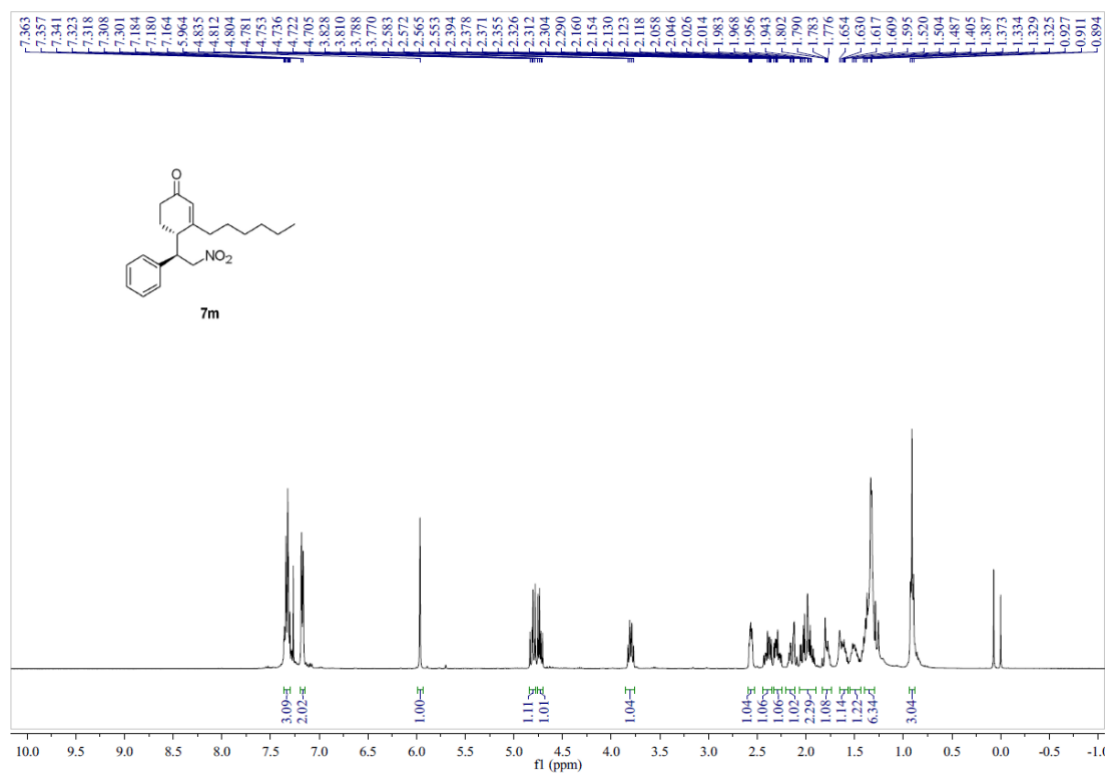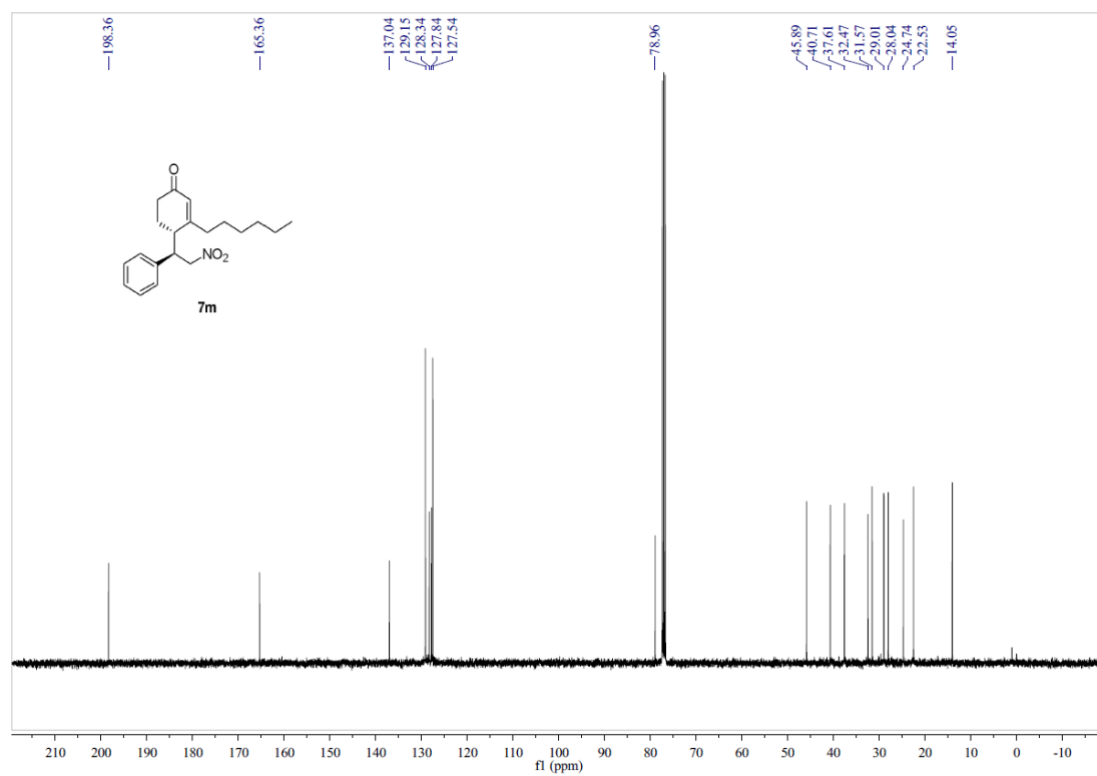

**7n: (S)-3-benzyl-4-((R)-2-nitro-1-phenylethyl)cyclohex-2-en-1-one**

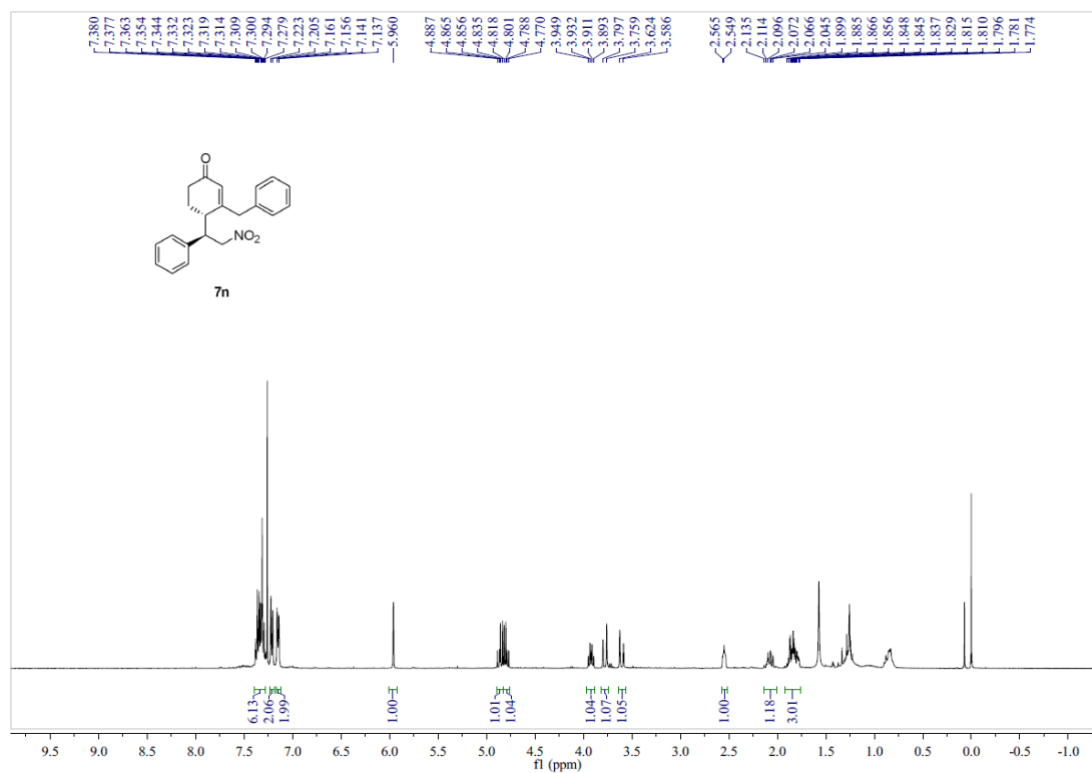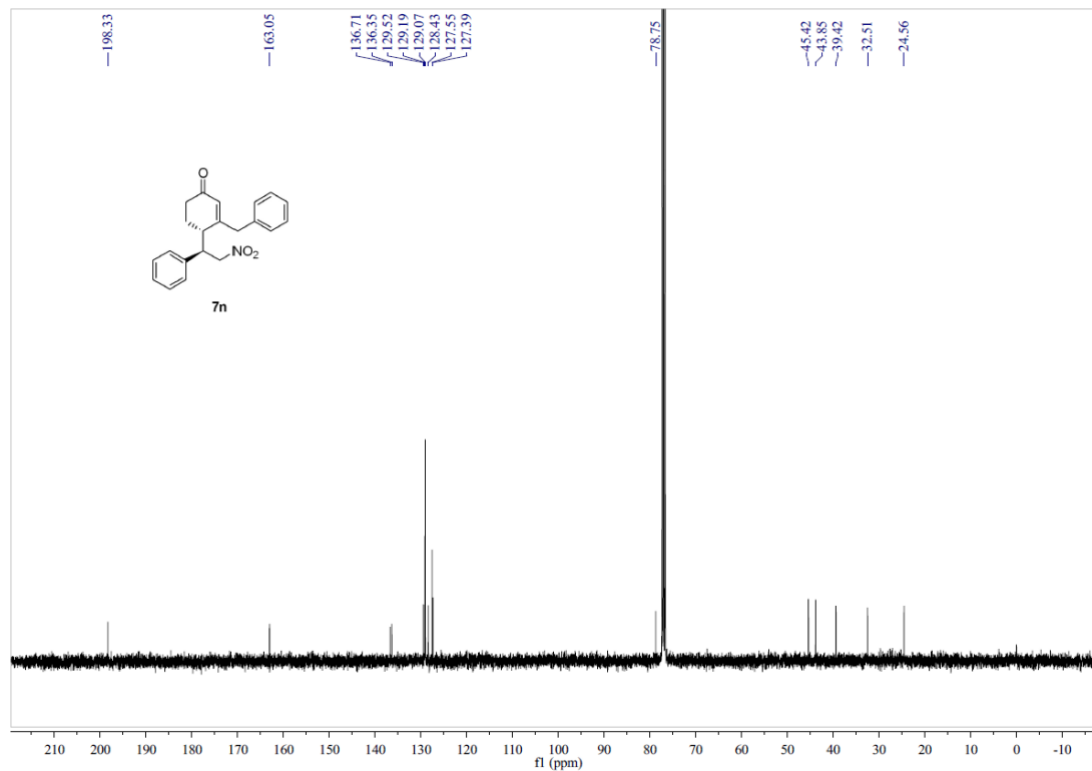

**7o: (S)-4-((R)-2-nitro-1-phenylethyl)-3-phenethylcyclohex-2-en-1-one**

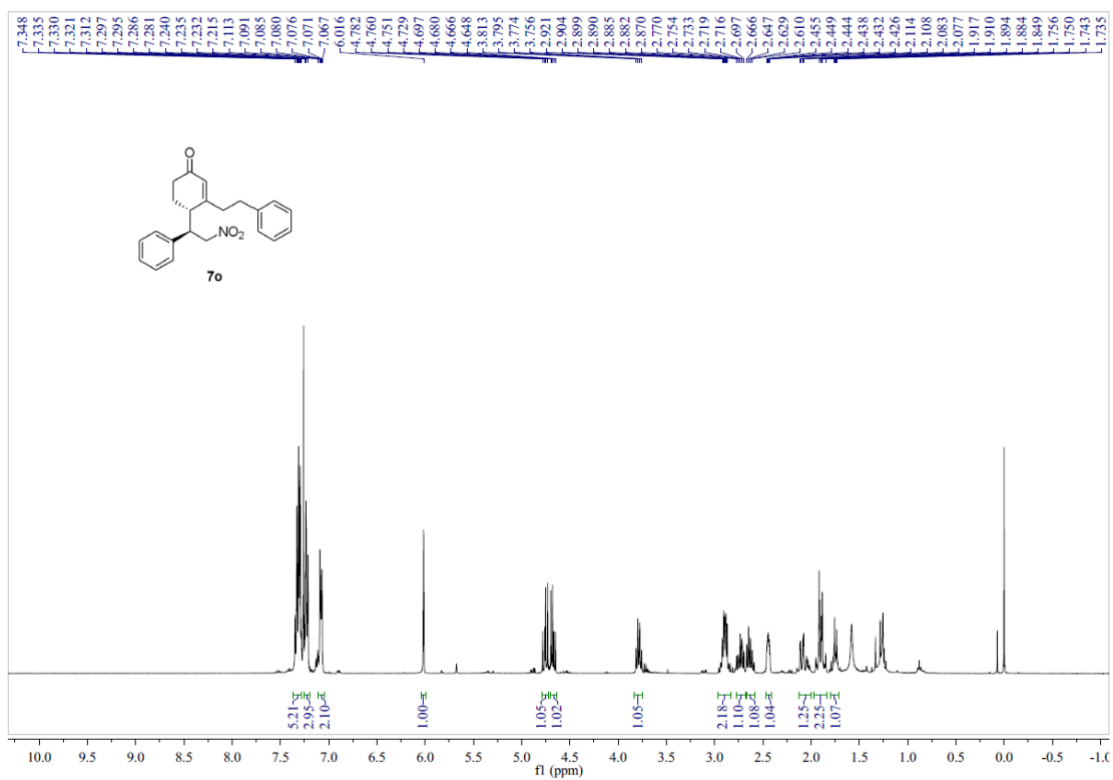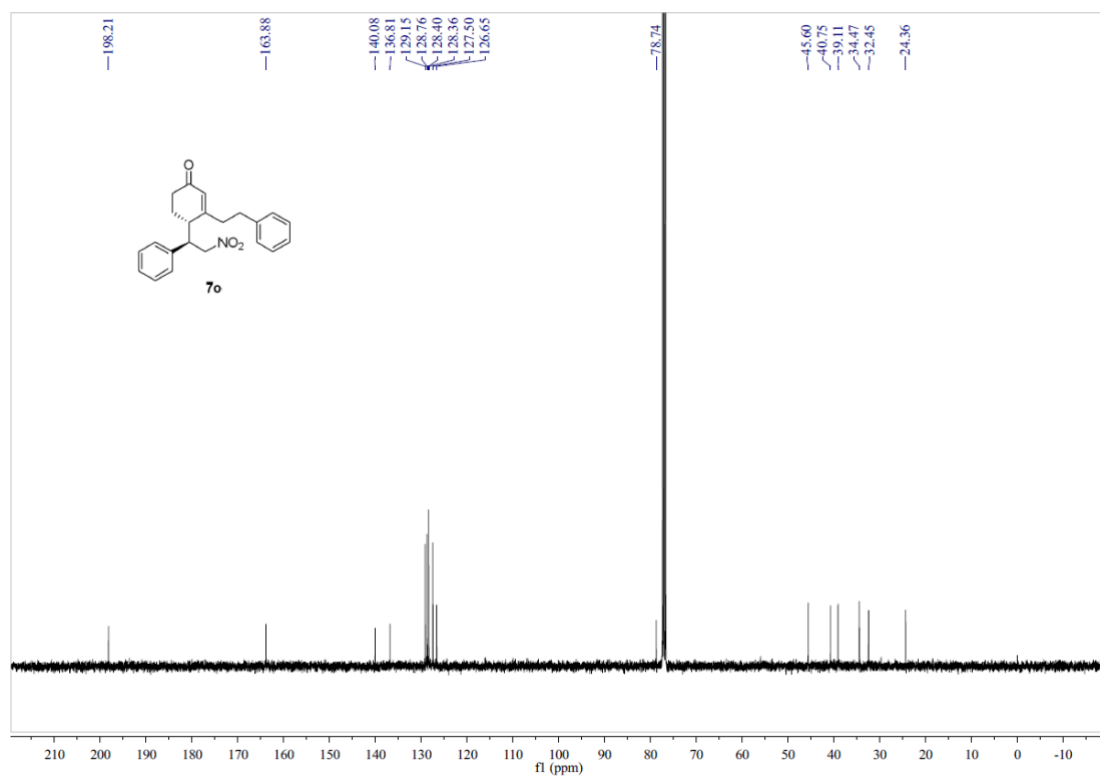

**7p: (S)-4-((R)-1-(4-bromophenyl)-2-nitroethyl)-3-butylcyclohex-2-en-1-one**

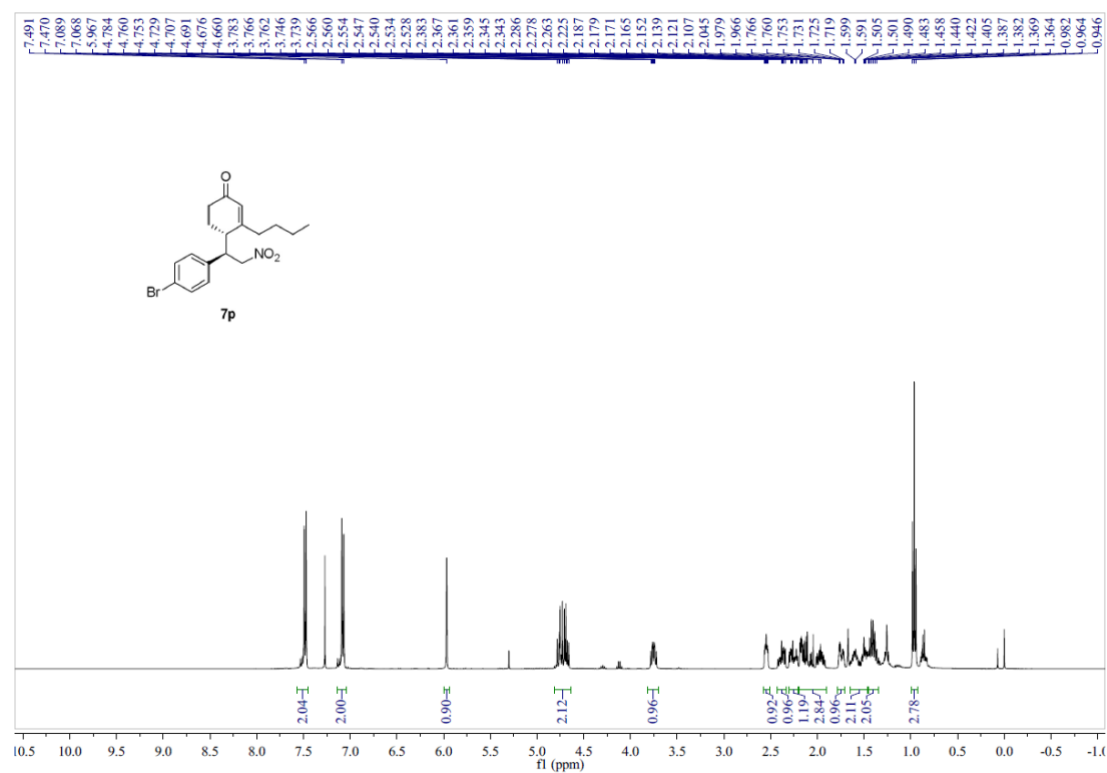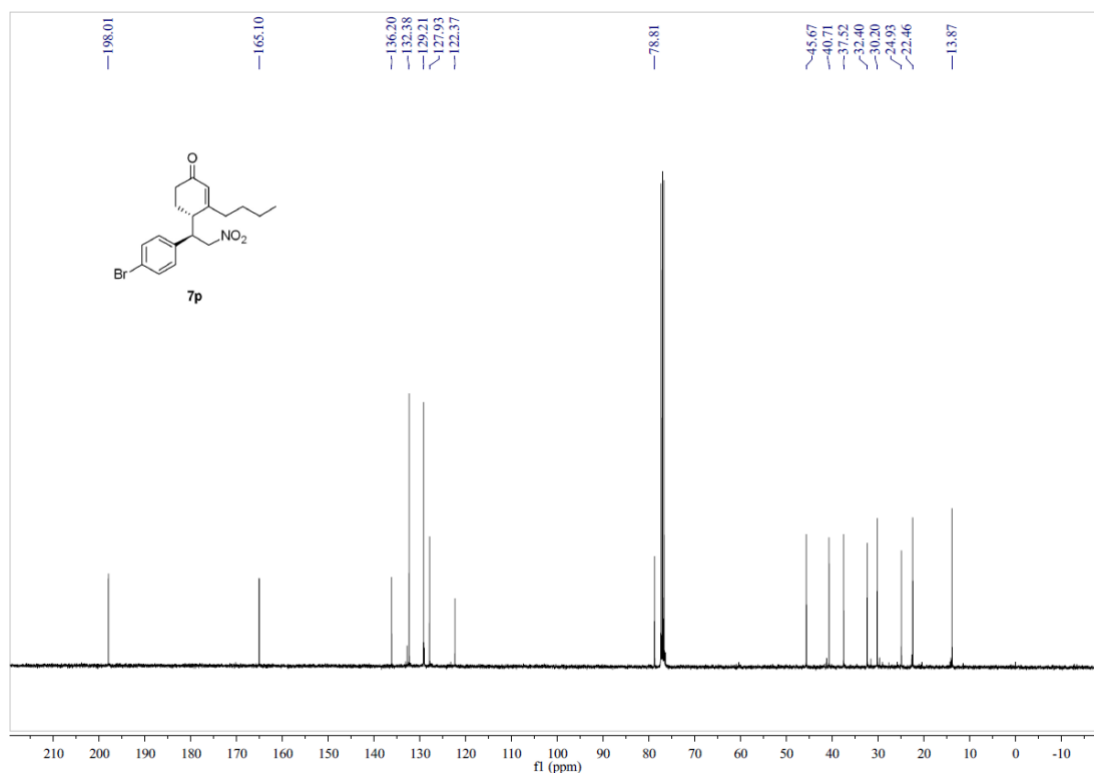

**7q: (S)-6-((R)-2-nitro-1-phenylethyl)-5,6-dihydro-[1,1'-biphenyl]-3(4H)-one**

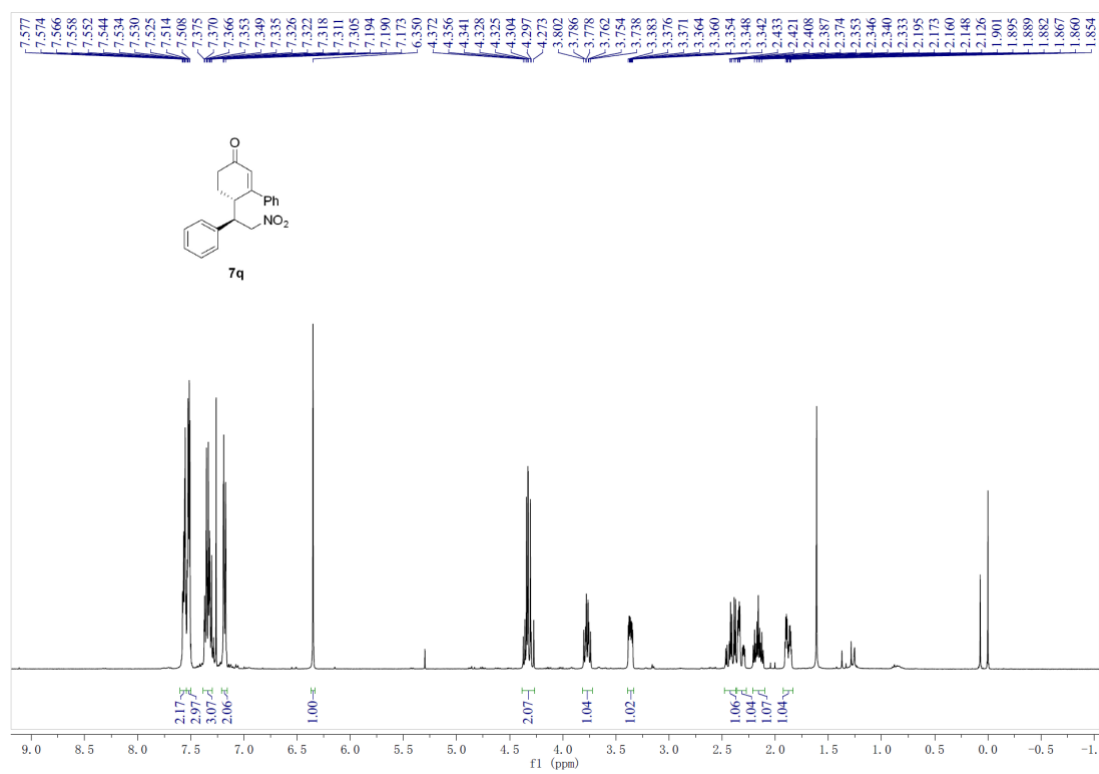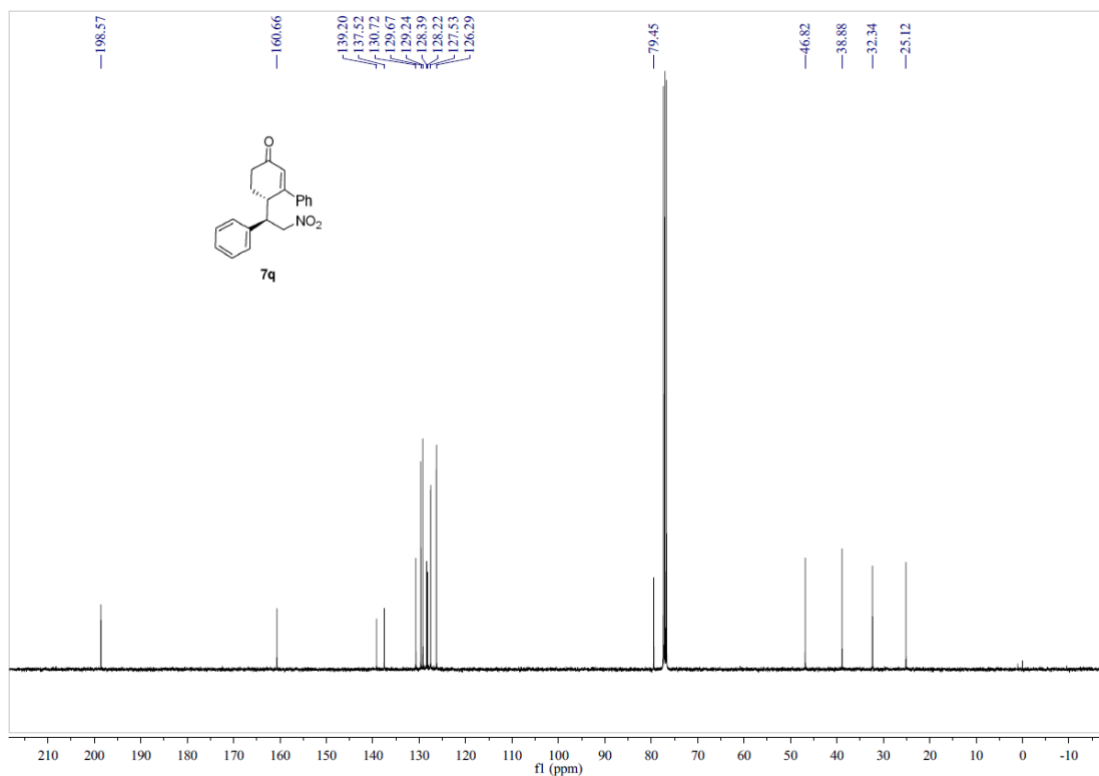

**7r: (S)-3',5'-dimethoxy-6-((R)-2-nitro-1-phenylethyl)-5,6-dihydro-[1,1'-biphenyl]-3(4H)-one**

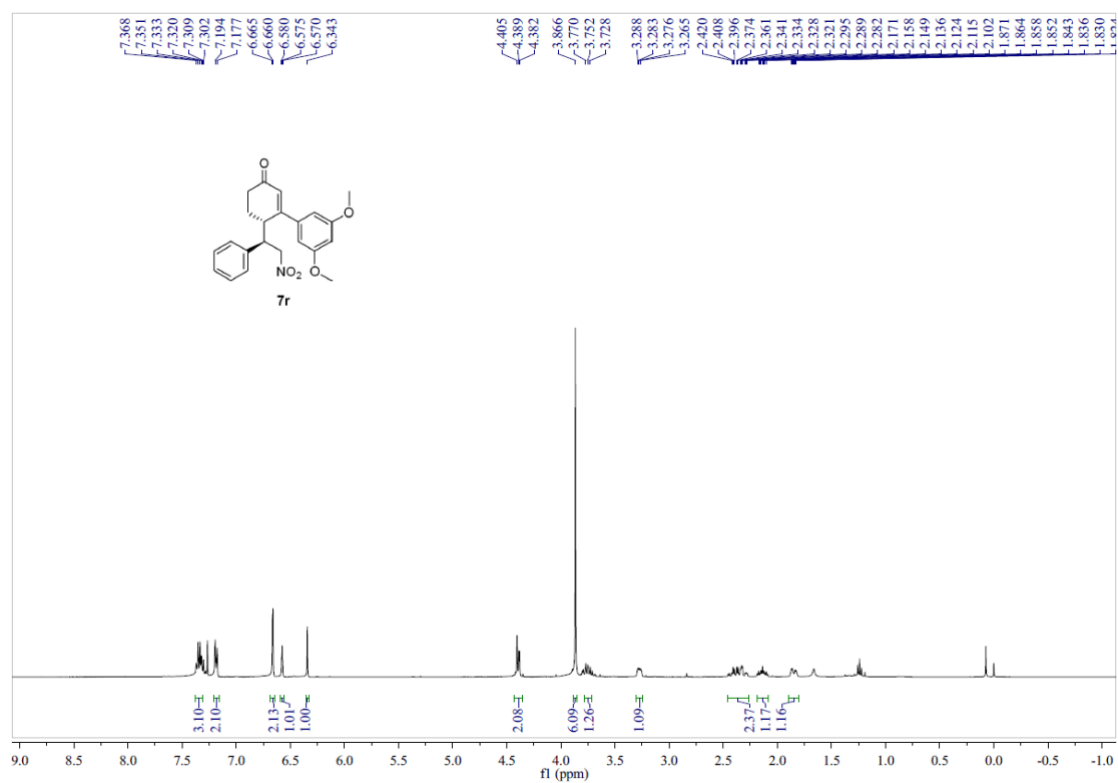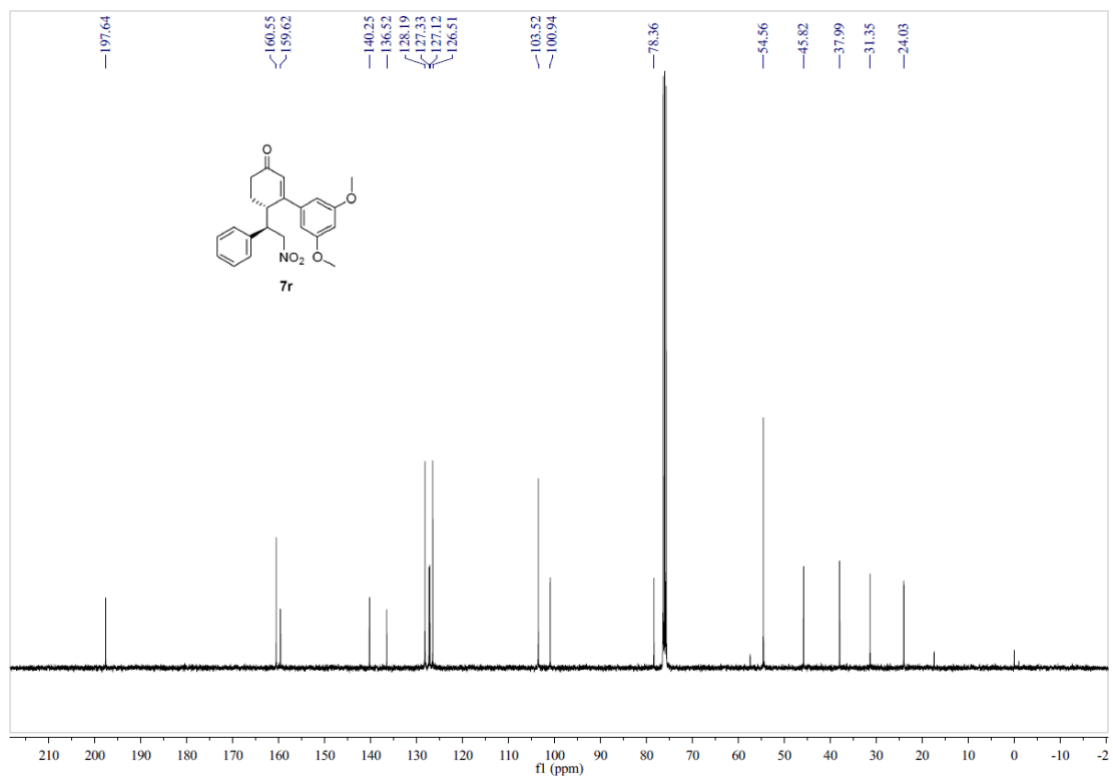

**7s: (S)-6-((R)-2-nitro-1-phenylethyl)-3',5'-bis(trifluoromethyl)-5,6-dihydro-[1,1'-biphenyl]-3(4H)-one**

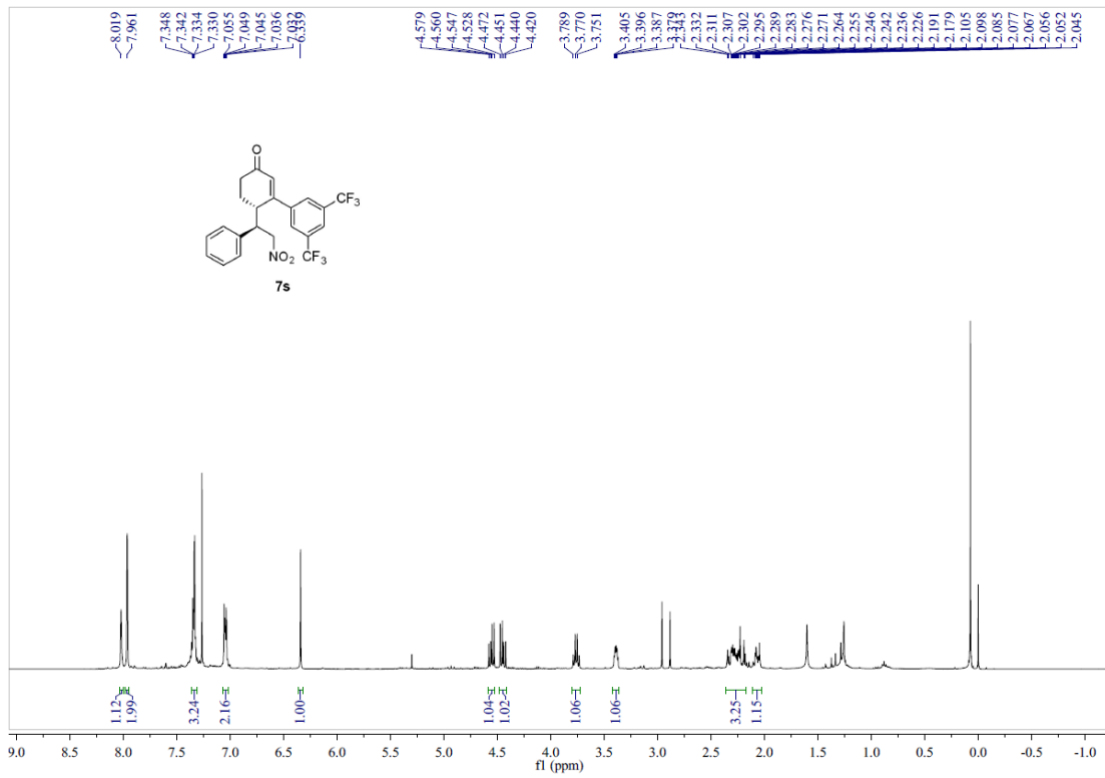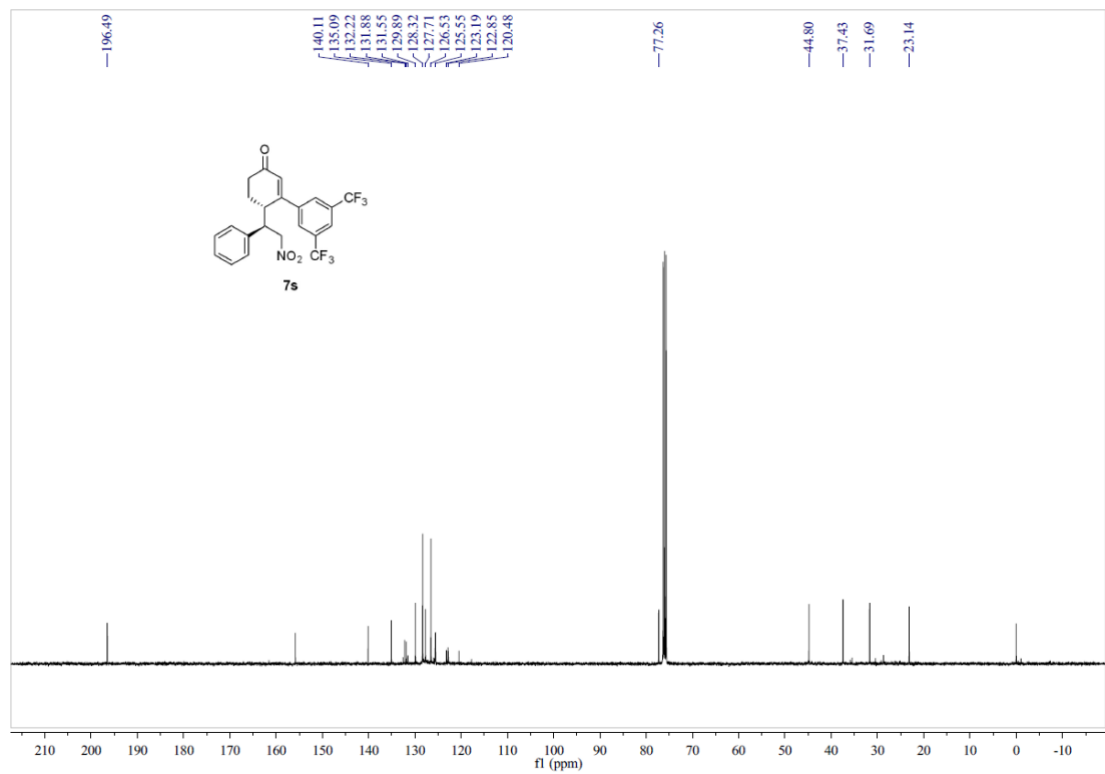

7t: (S)-6-((R)-1-(4-bromophenyl)-2-nitroethyl)-5,6-dihydro-[1,1'-biphenyl]-3(4H)-one

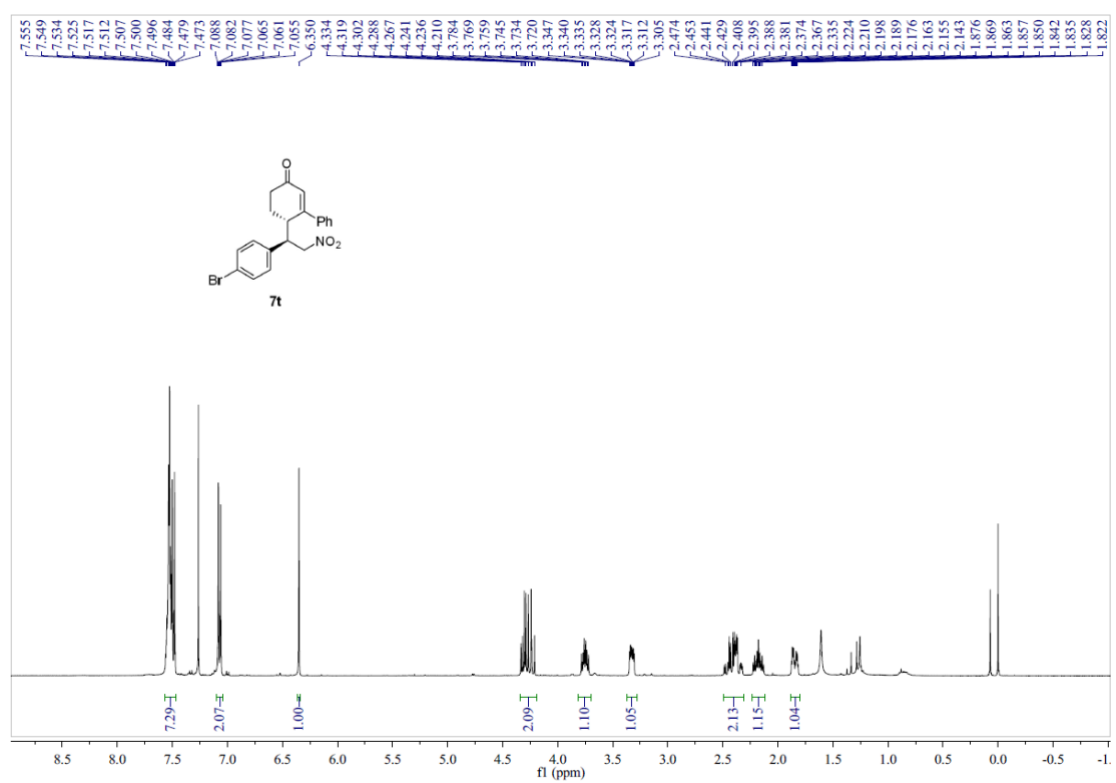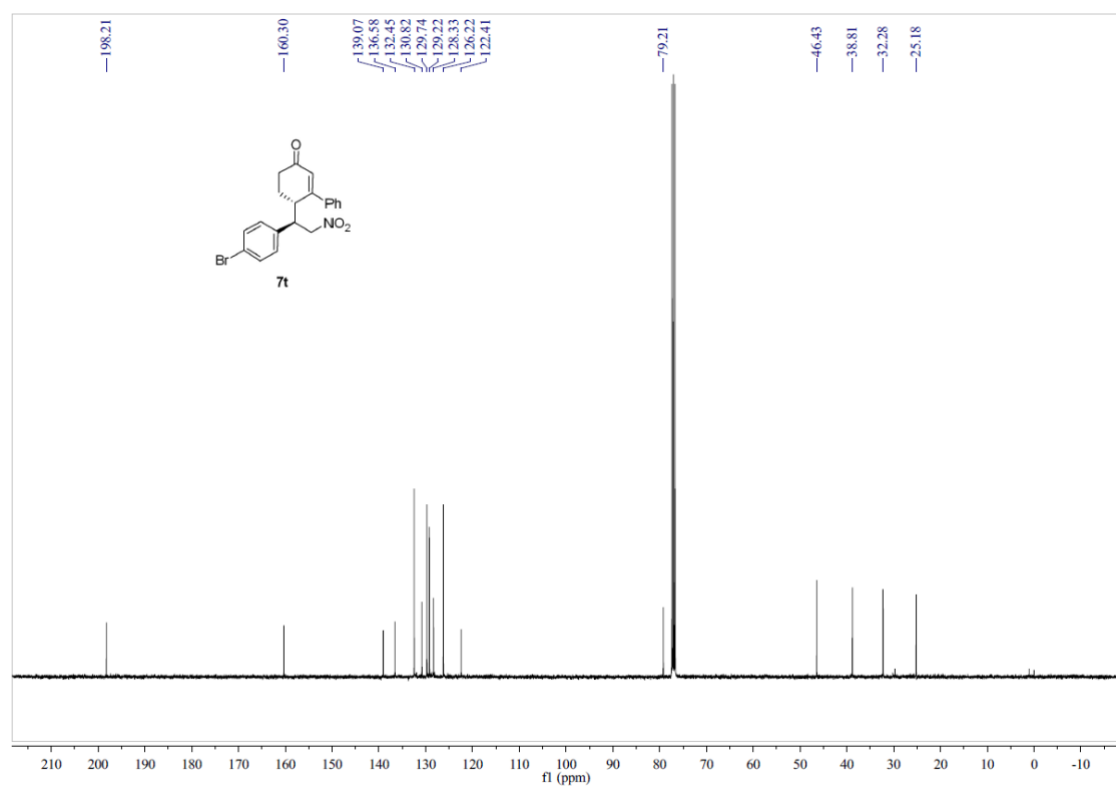



**7u: (S)-4-((R)-2-nitro-1-phenylethyl)-3-(phenylethynyl)cyclohex-2-en-1-one**

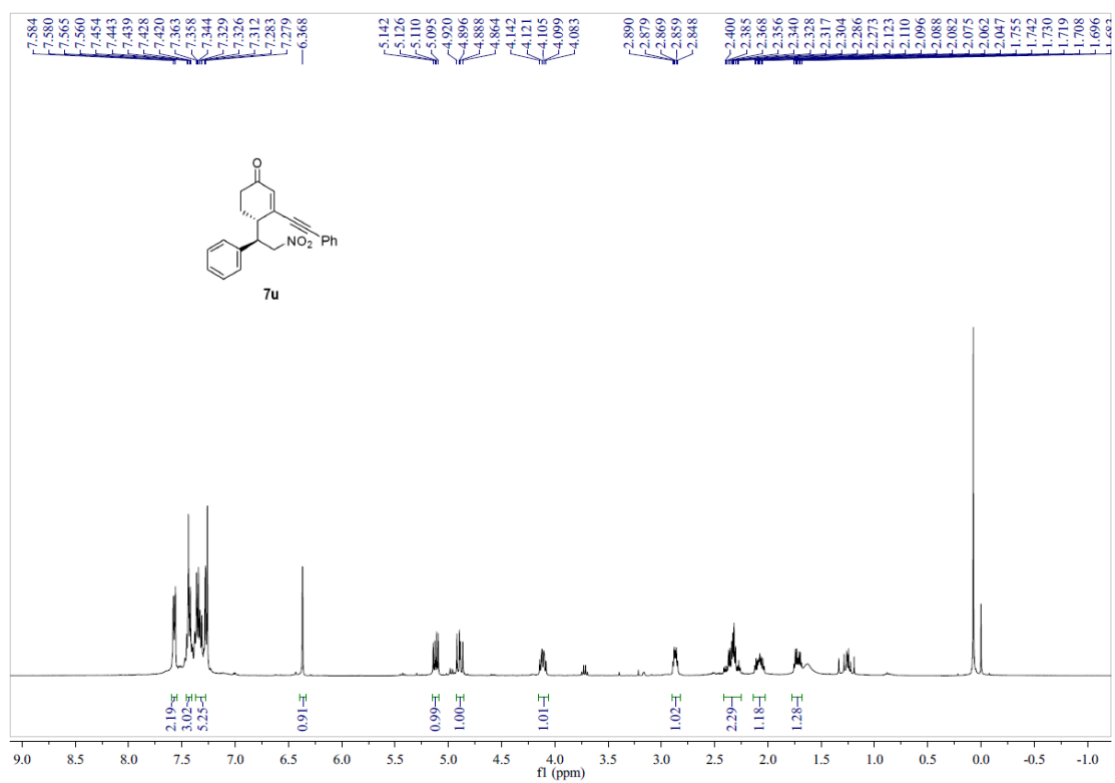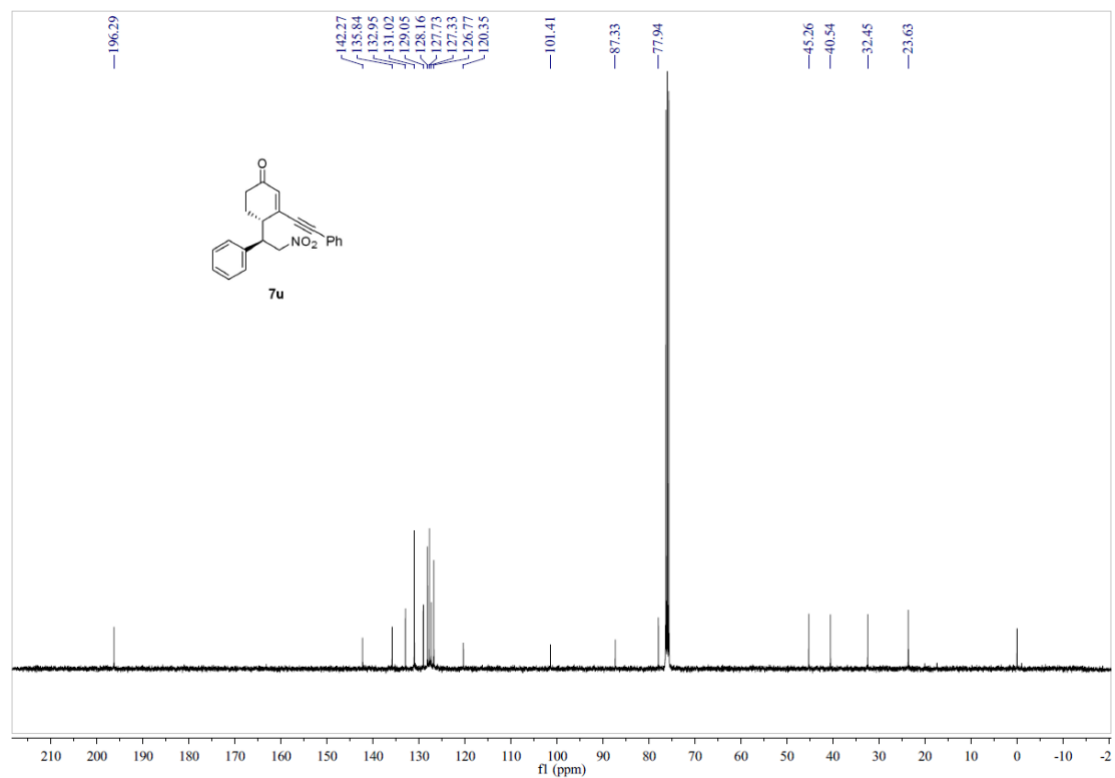

**10: 2-((1*S*,2*R*)-2-(3-oxocyclohex-1-en-1-yl)-1-phenylpropyl)malononitrile**

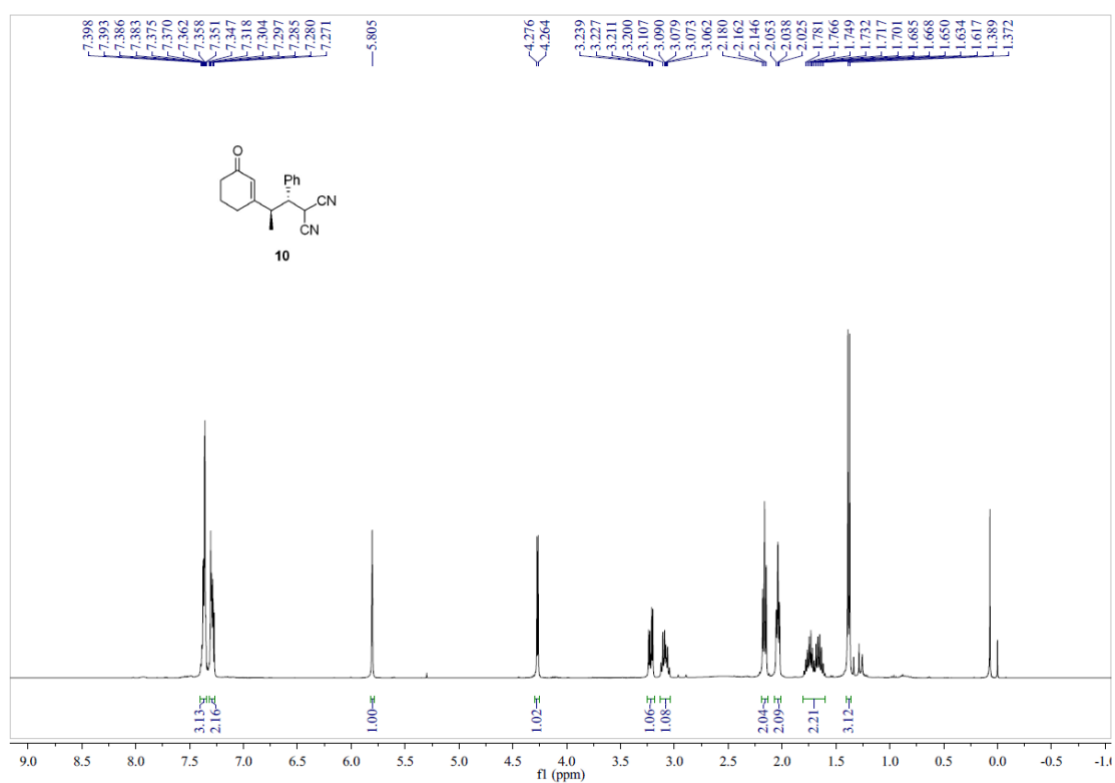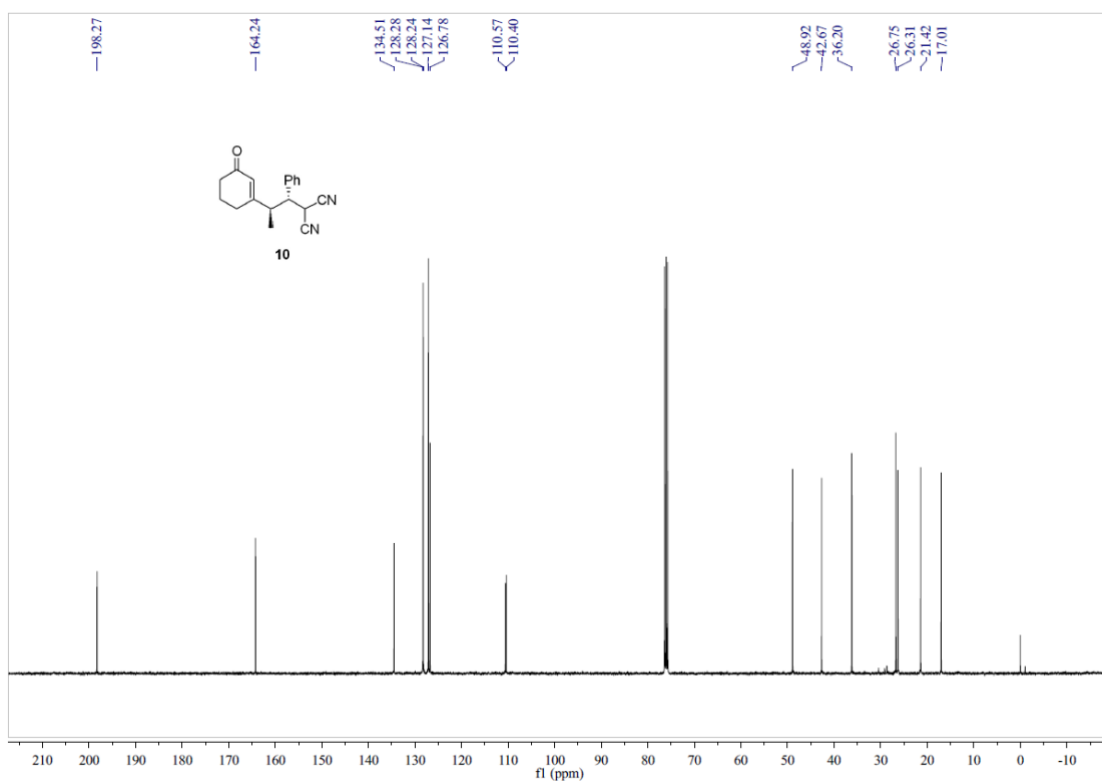

**11: 2-((1*S*,2*S*)-2-(3-oxocyclohex-1-en-1-yl)-1-phenylpropyl)malononitrile**

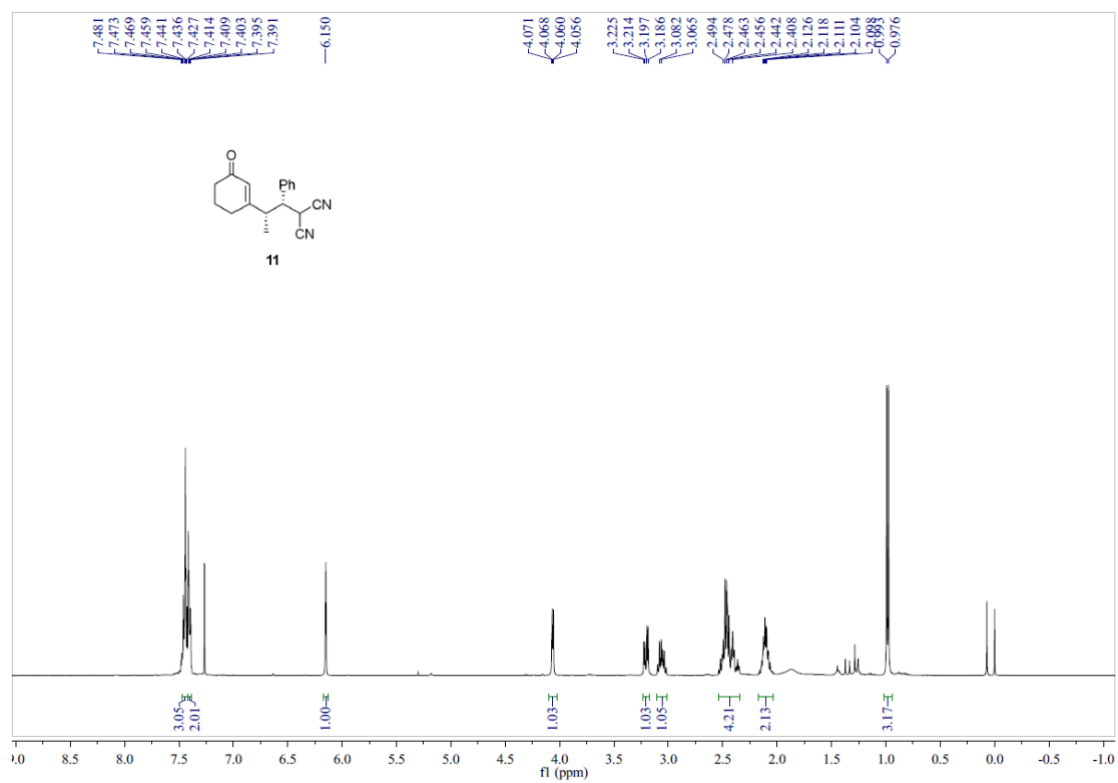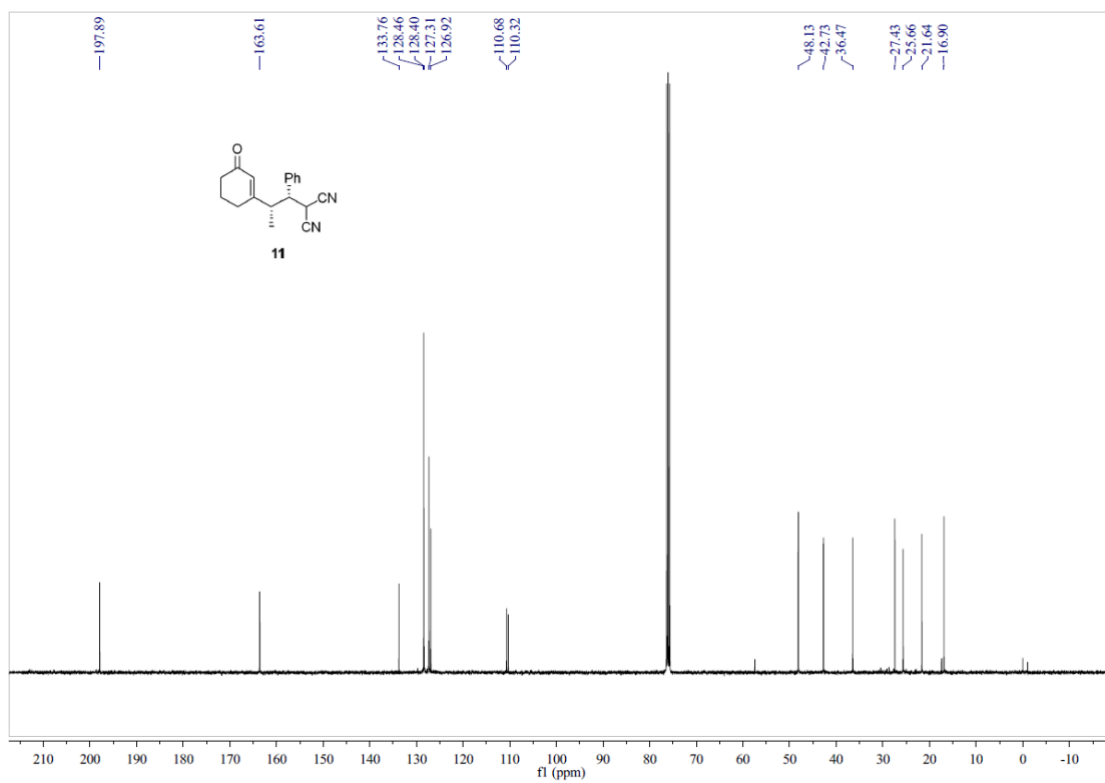

**12a: (S)-3-((R)-4-oxo-2-((E)-styryl)cyclohex-2-en-1-yl)-1-phenylpyrrolidine-2,5-dione**

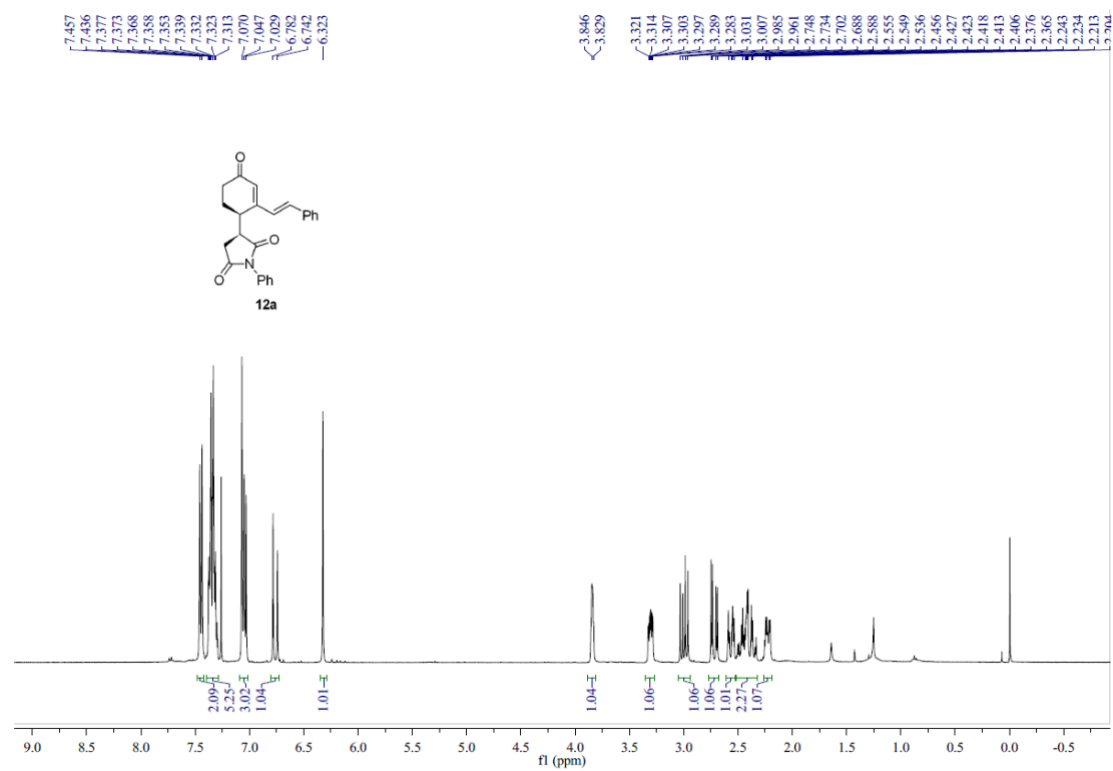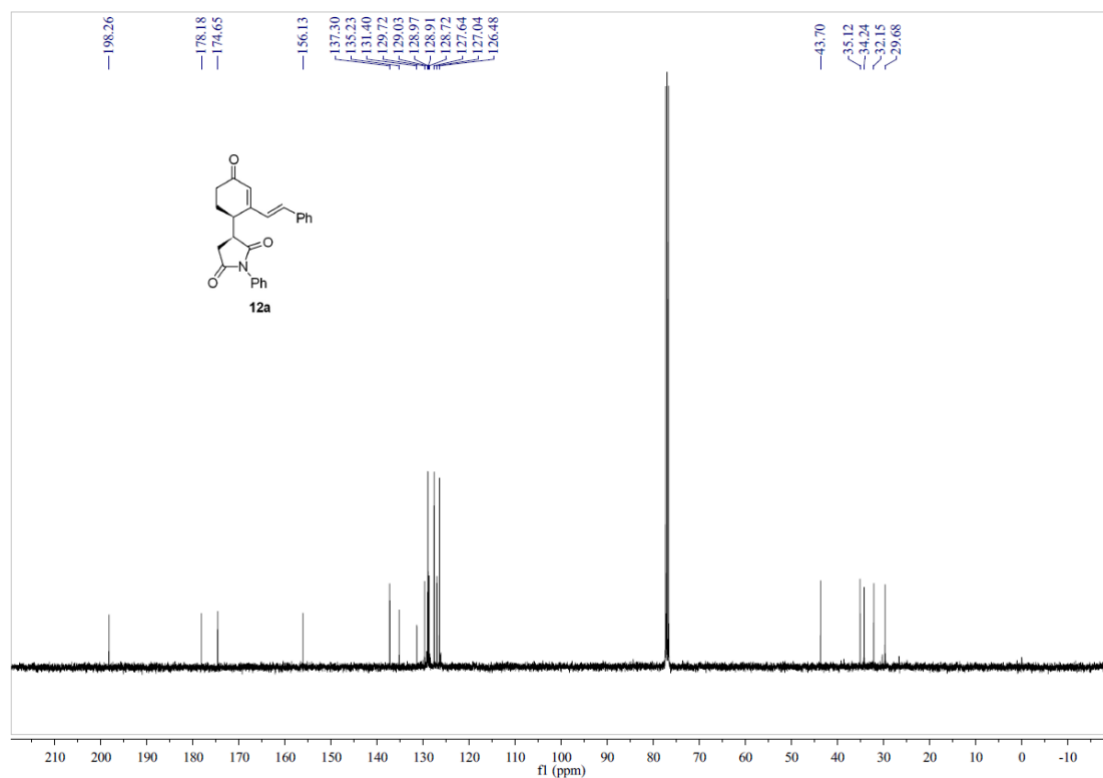

**12b: (S)-3-((R)-2-((E)-4-chlorostyryl)-4-oxocyclohex-2-en-1-yl)-1-phenylpyrrolidine-2,5-dione**

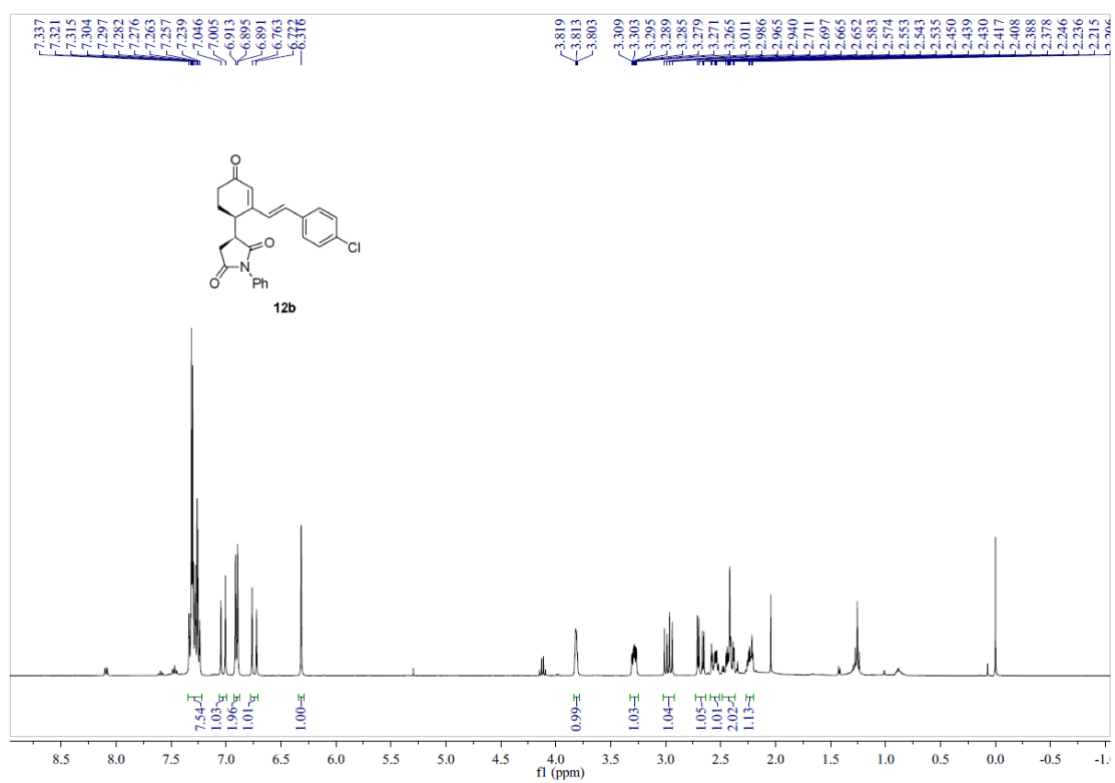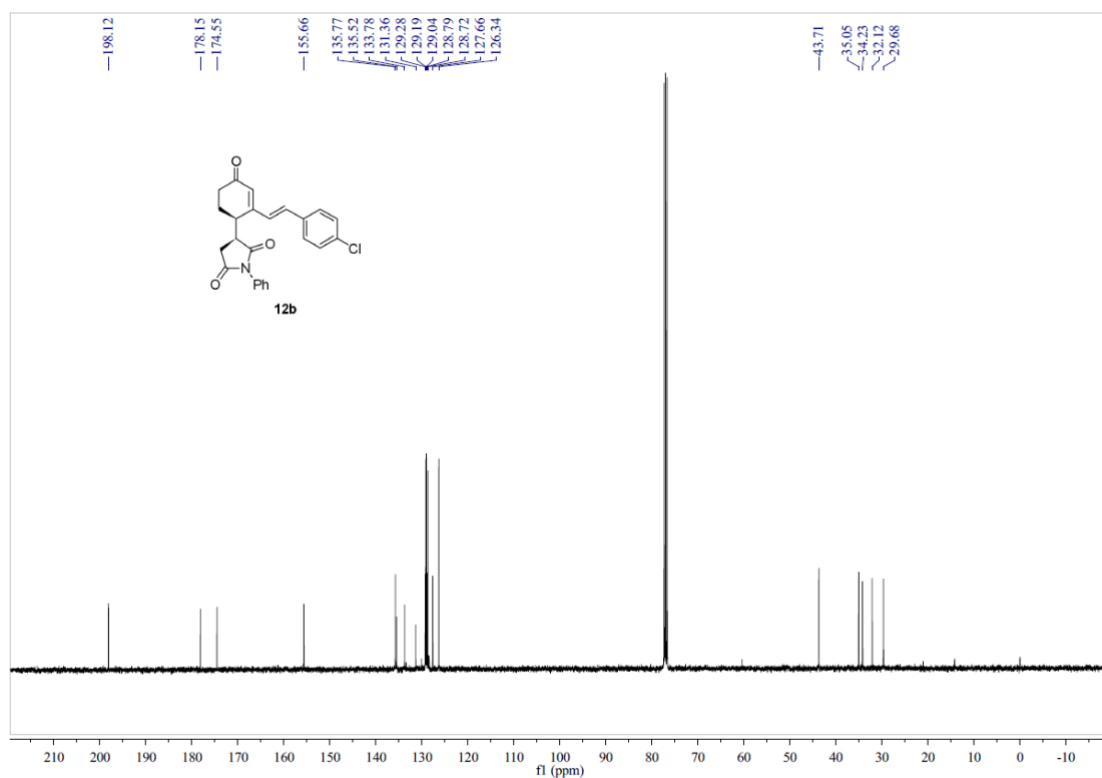

14: (2R,3R,4R,5R,6S)-5-methyl-3-nitro-8-oxo-2,4-diphenylspiro[5.5]undecane-1,1-dicarbonitrile

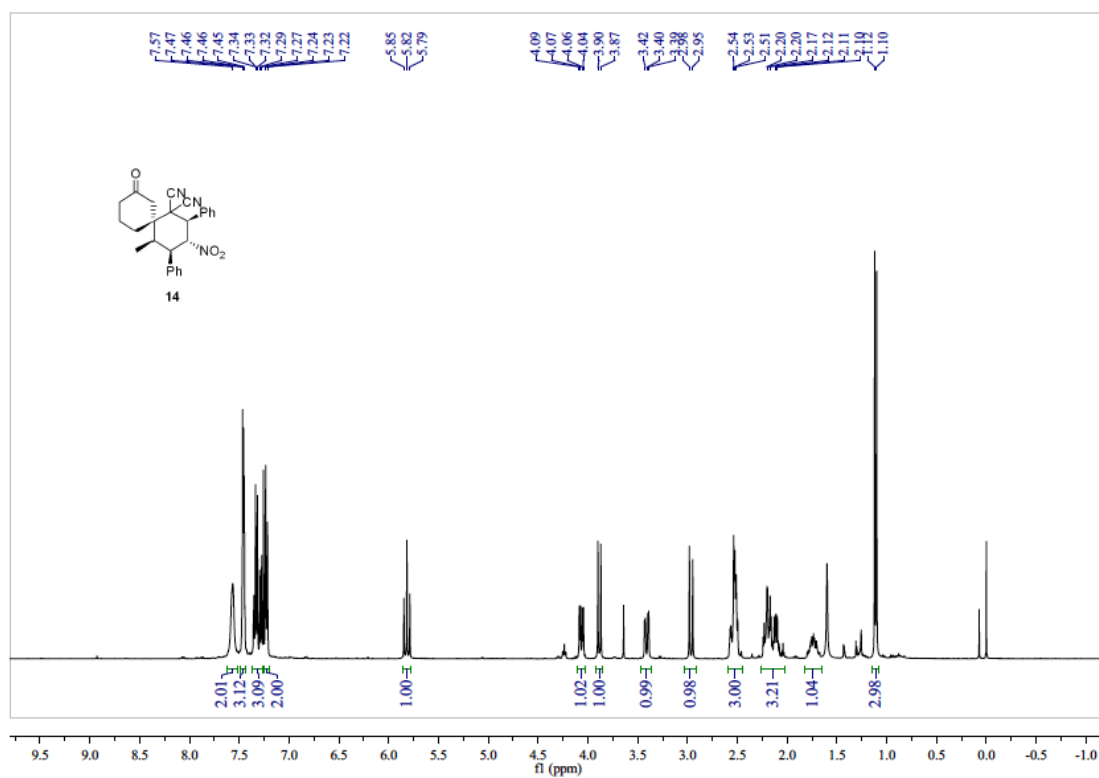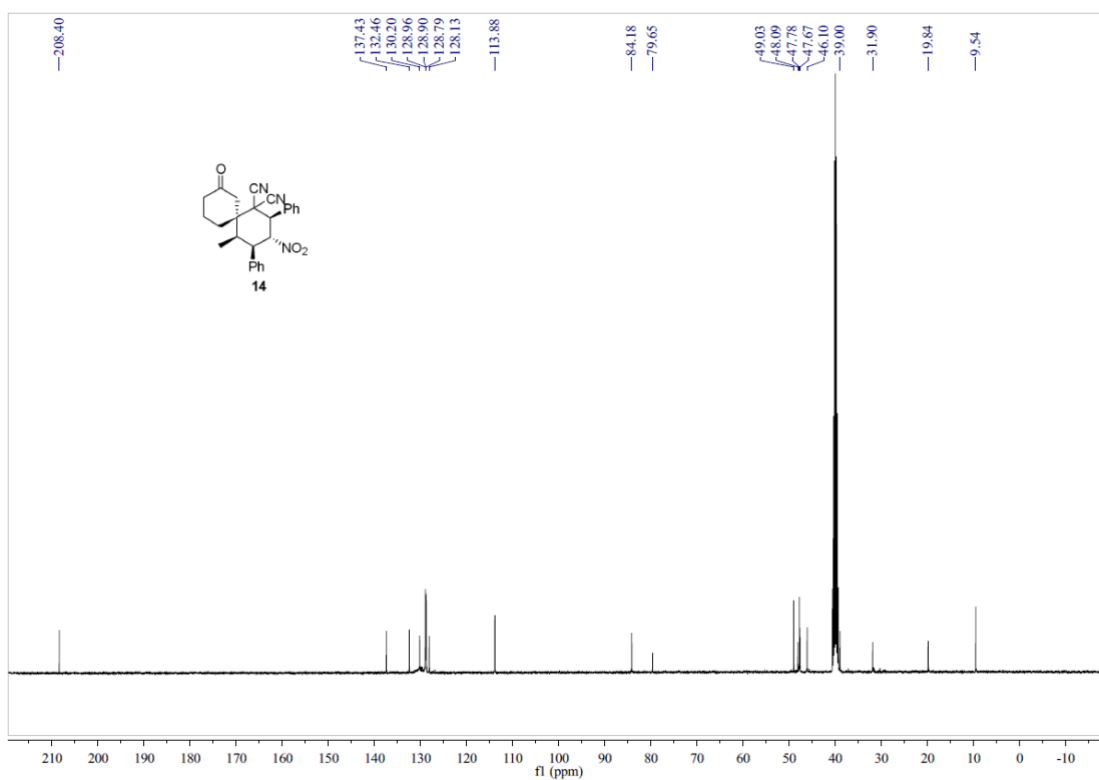

**15: (2R,3R,4R,5S,6R)-5-methyl-3-nitro-8-oxo-2,4-diphenylspiro[5.5]undecane-1,1-dicarbonitrile**

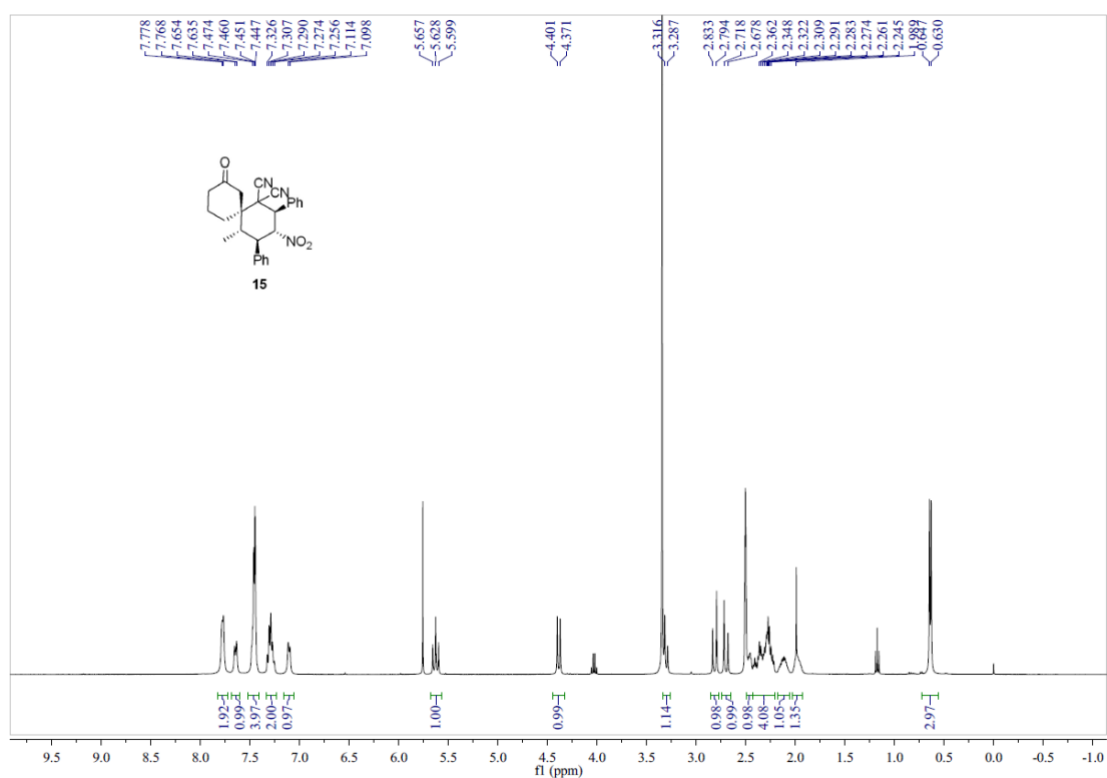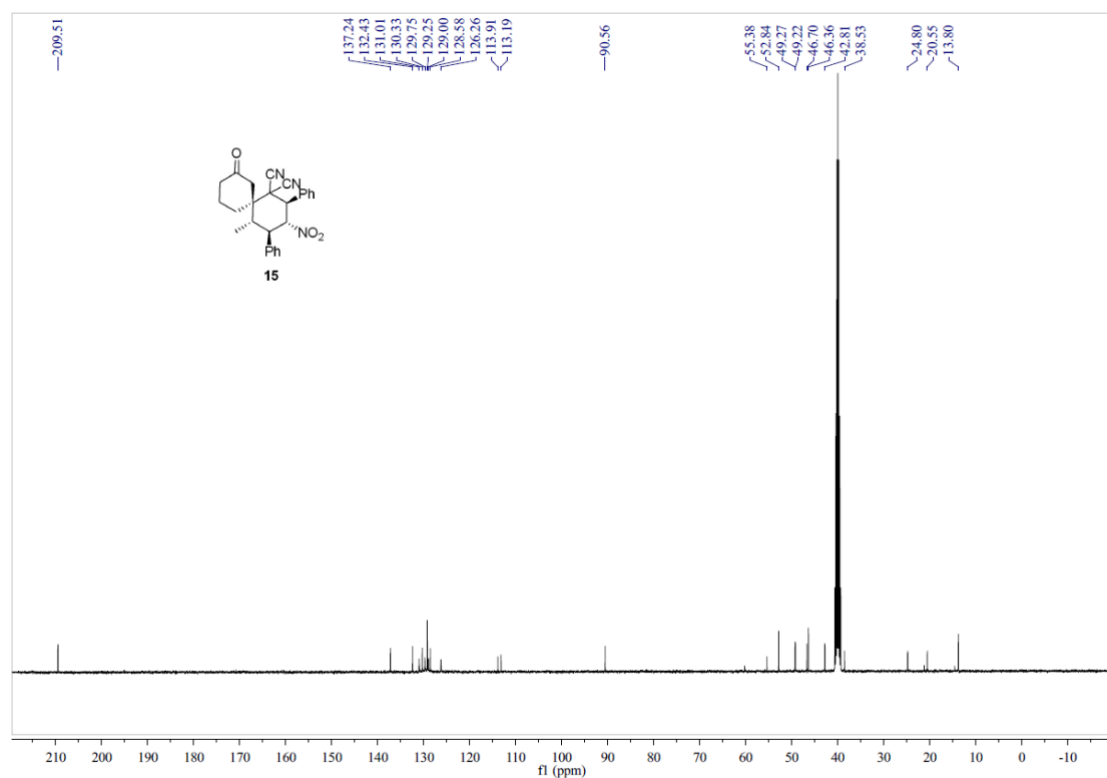

**16: (2R,3R,4R,4aR,8aR)-8a-ethyl-3-nitro-7-oxo-2,4-diphenyloctahydronaphthalene-1,1(2H)-dicarbonitrile**

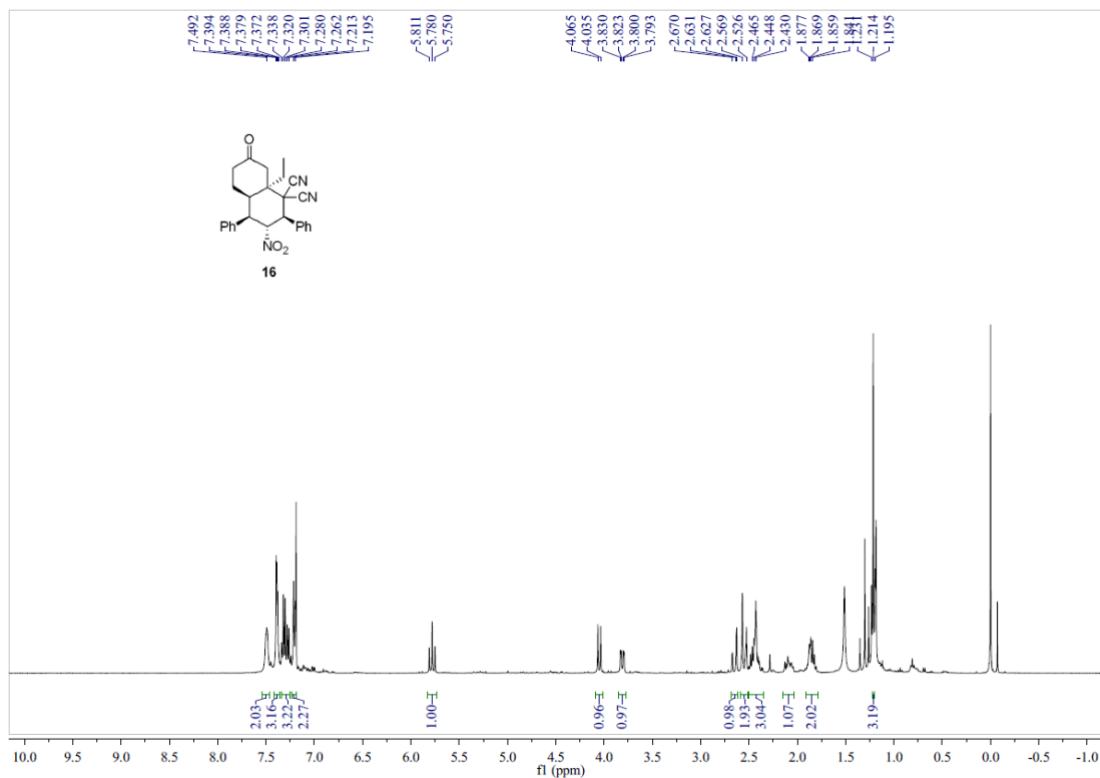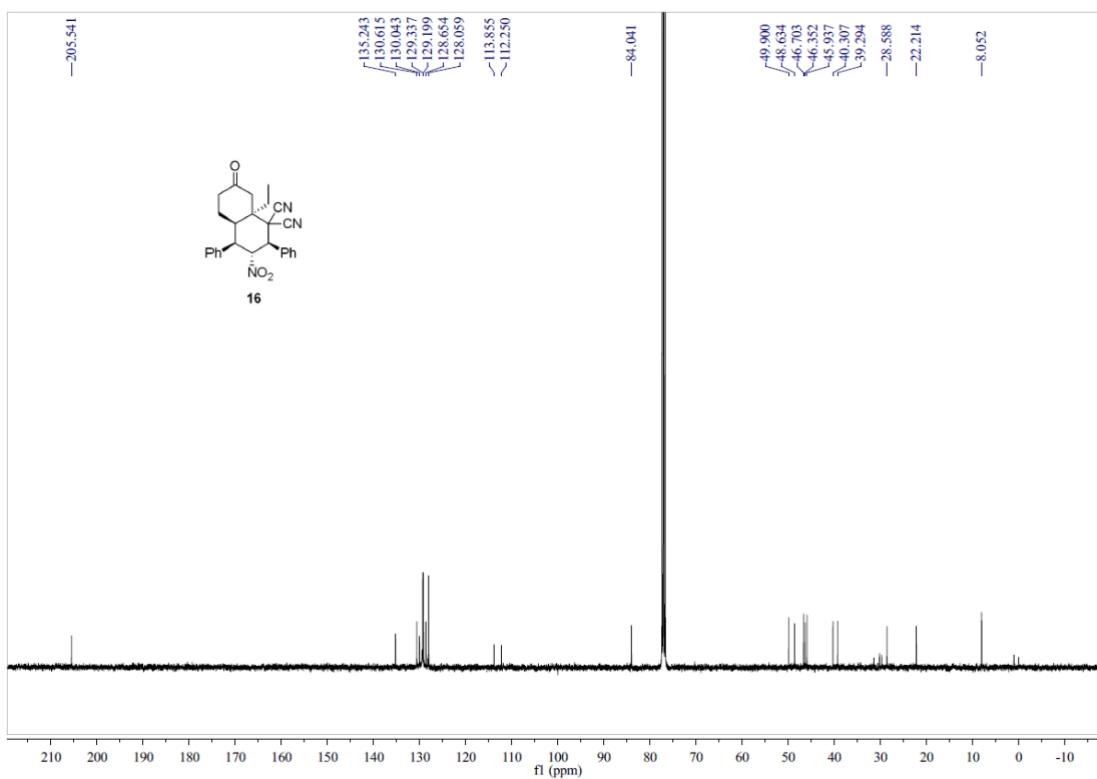



**17: (2*R*,3*R*,4*R*,4*aS*,8*aS*)-8*a*-ethyl-3-nitro-7-oxo-2,4-diphenyloctahydronaphthalene-1,1(2*H*)-dicarbonitrile**

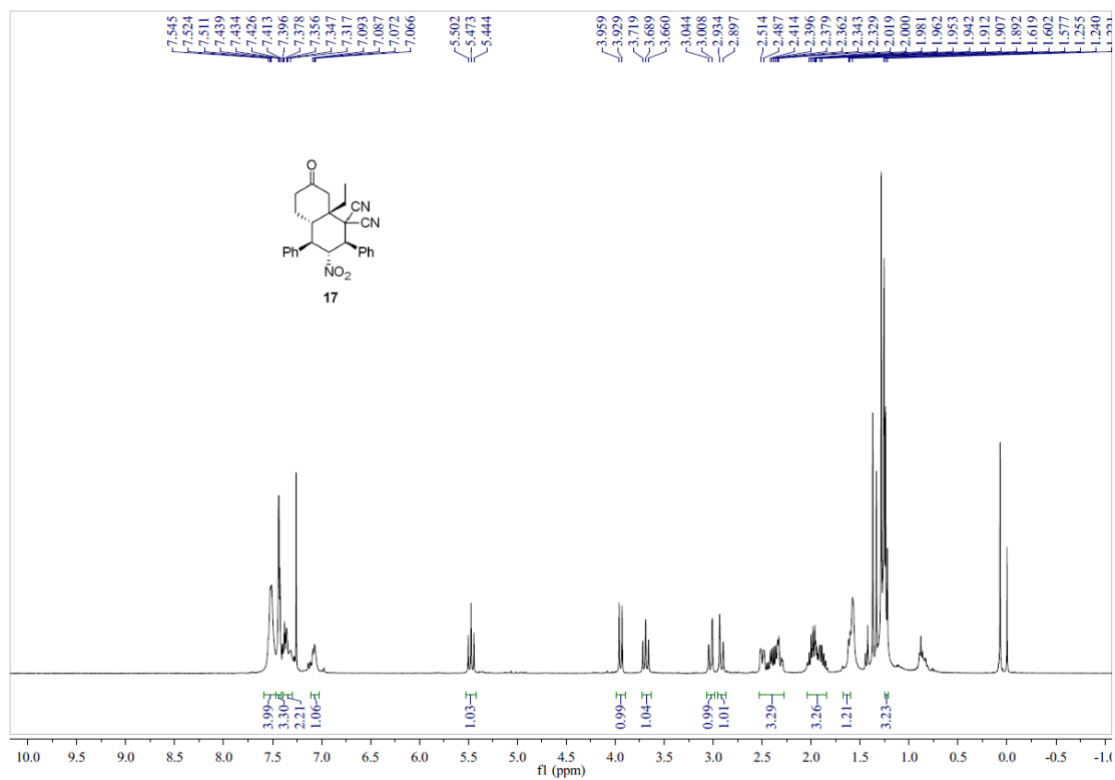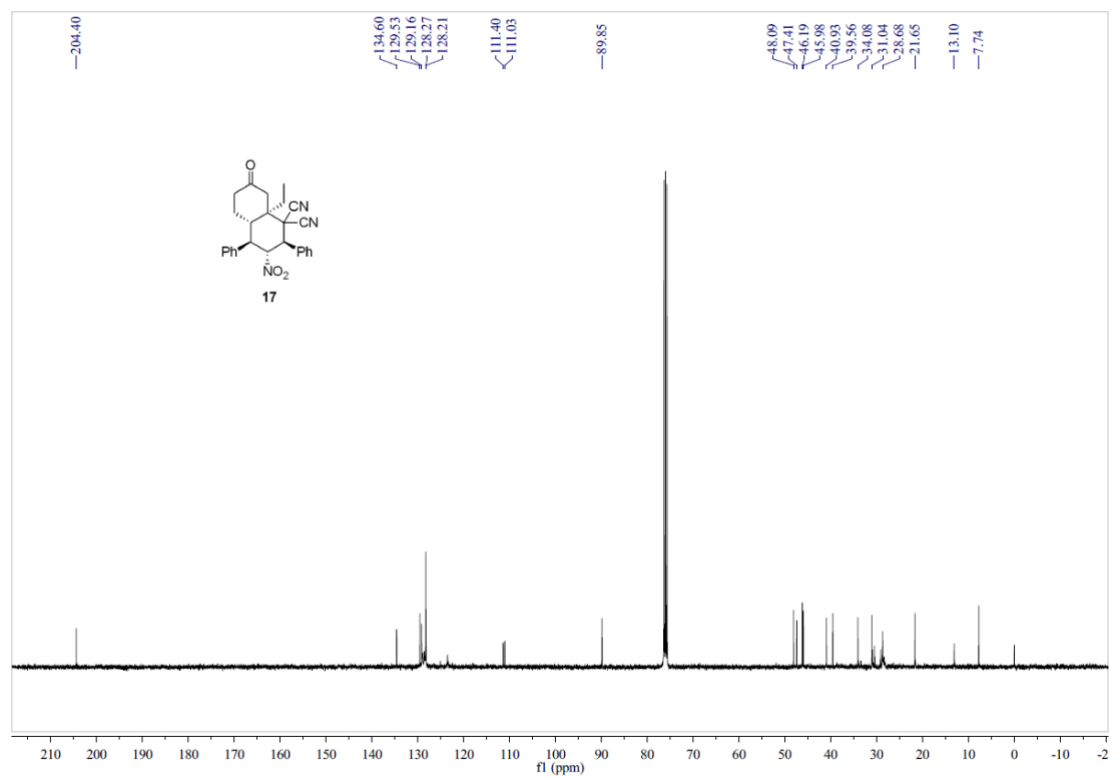

## F: HPLC Charts of Products.

### 4a: 3-((2*R*,3*R*)-4-nitro-3-phenylbutan-2-yl)cyclohex-2-en-1-one

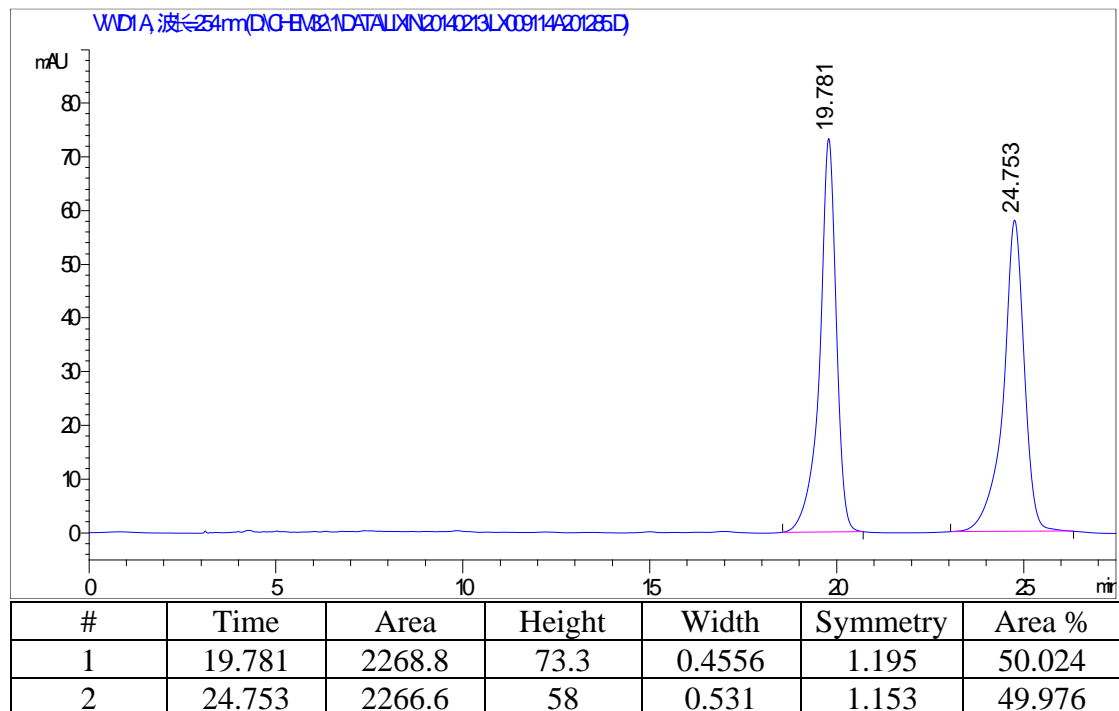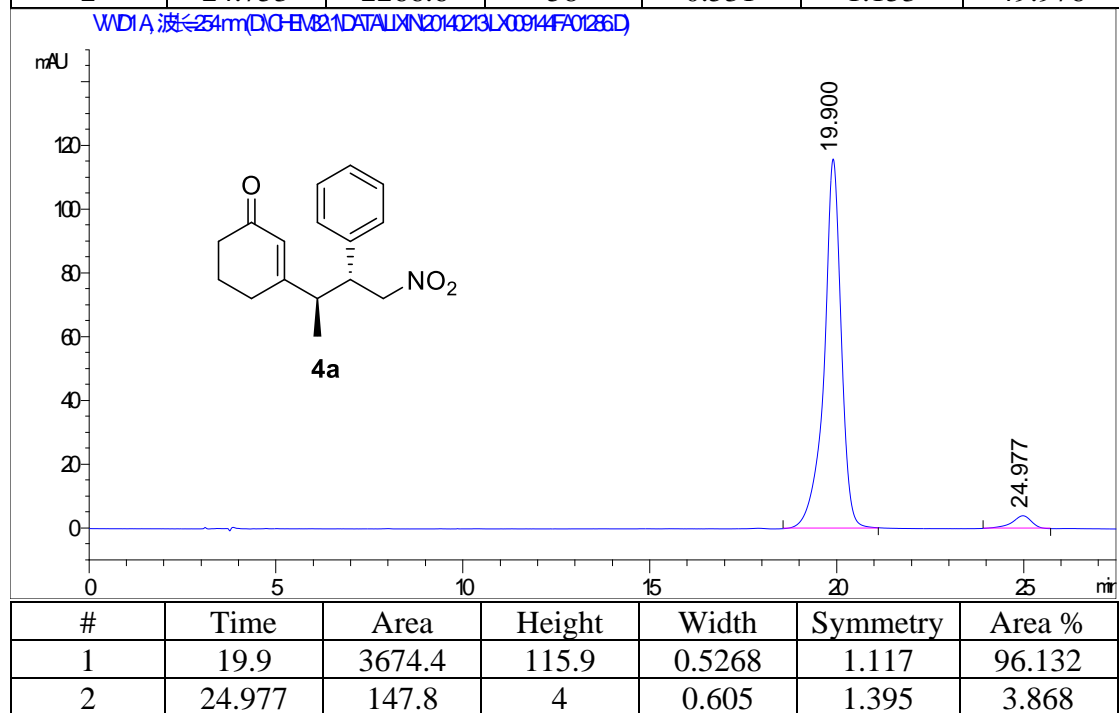

**4b: 3-((2R,3R)-4-nitro-3-(p-tolyl)butan-2-yl)cyclohex-2-en-1-one**

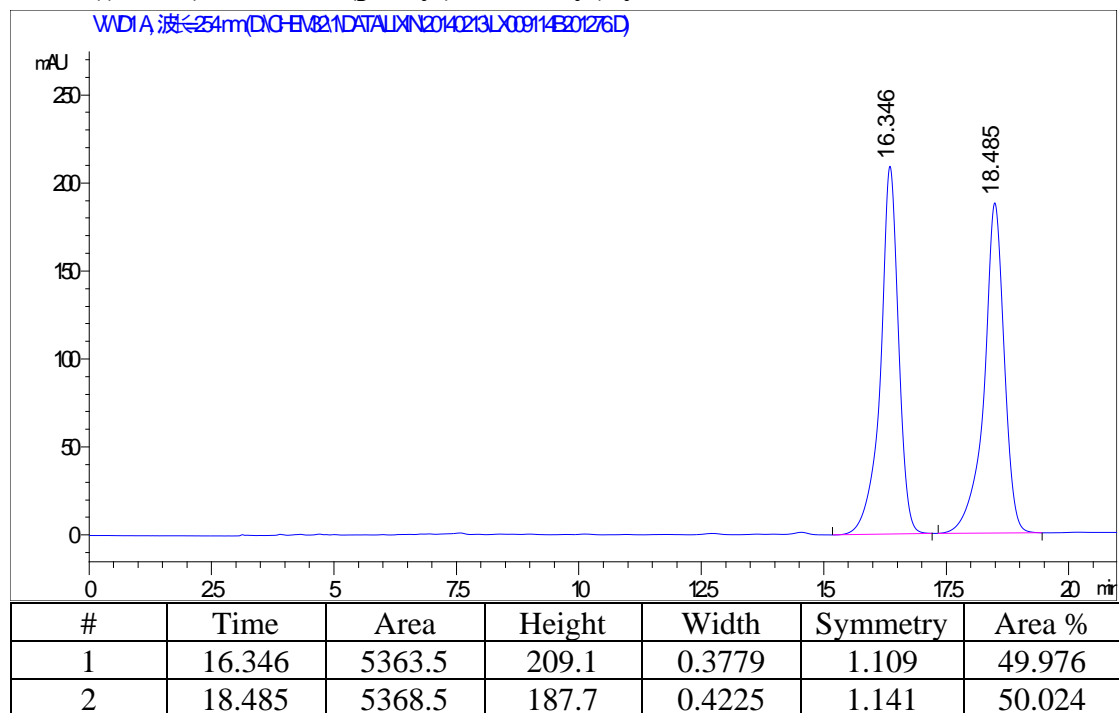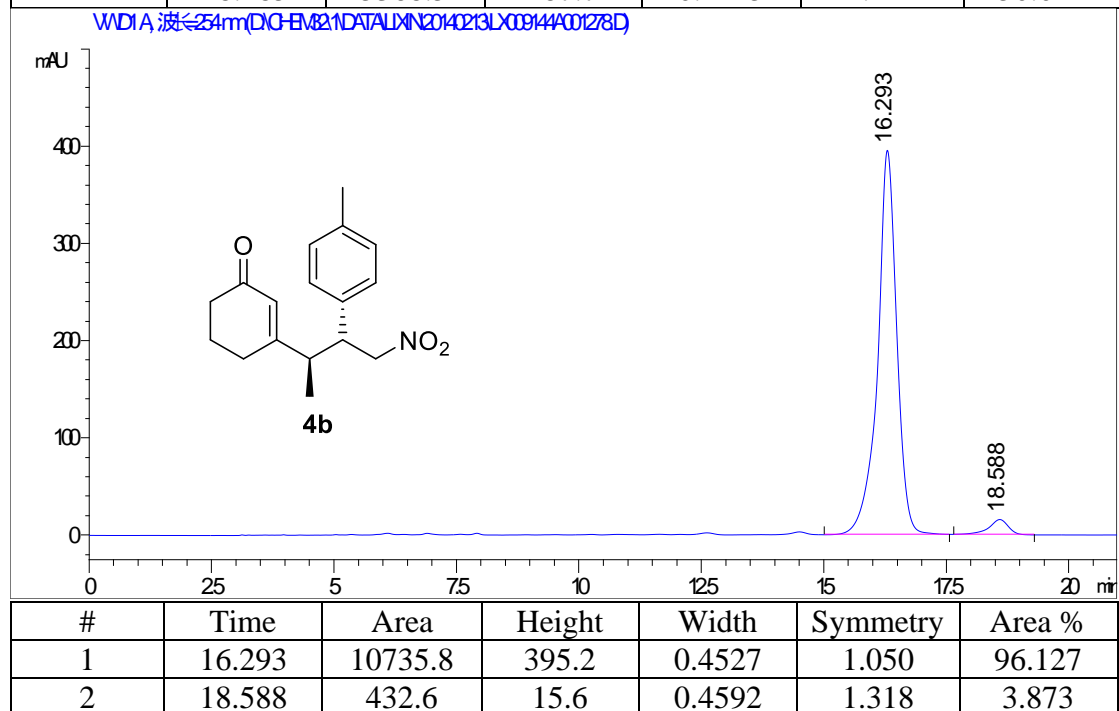

**4c: 3-((2R,3R)-3-(4-methoxyphenyl)-4-nitrobutan-2-yl)cyclohex-2-en-1-one**

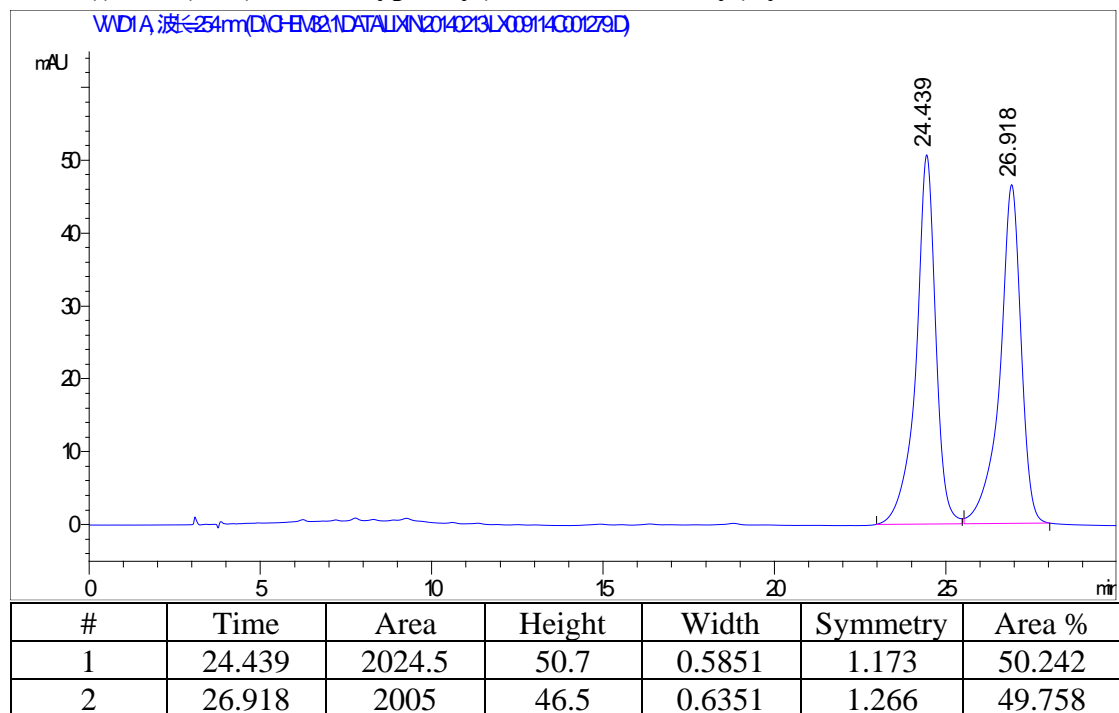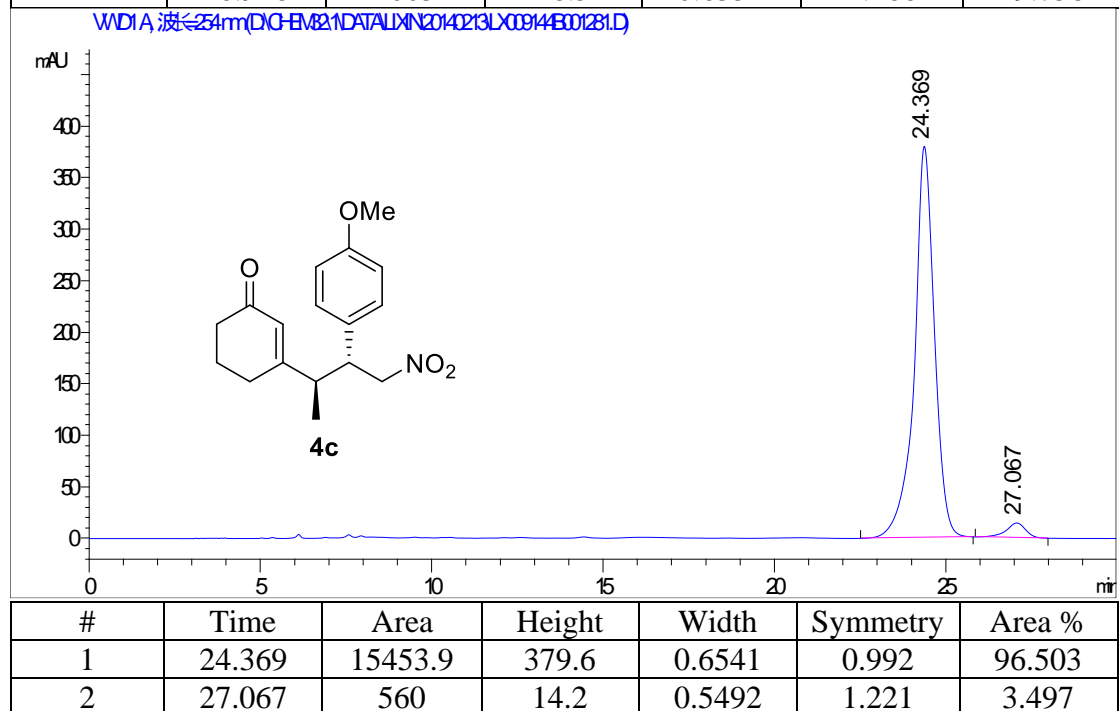

**4d: 3-((2R,3R)-3-(4-fluorophenyl)-4-nitrobutan-2-yl)cyclohex-2-en-1-one**

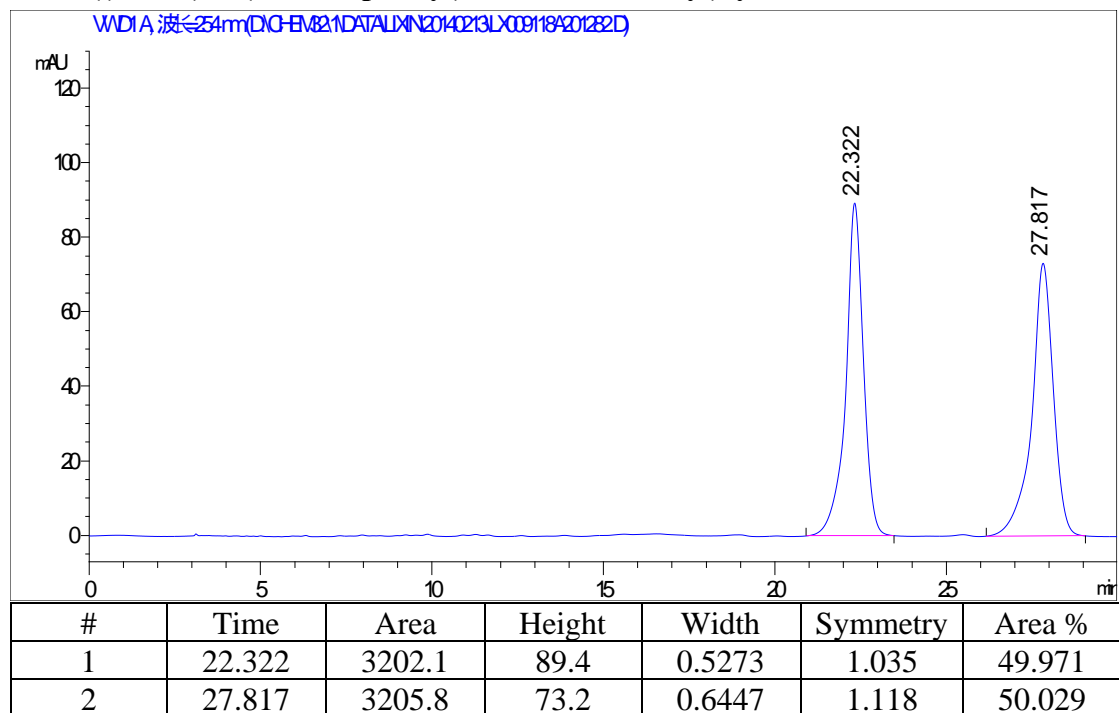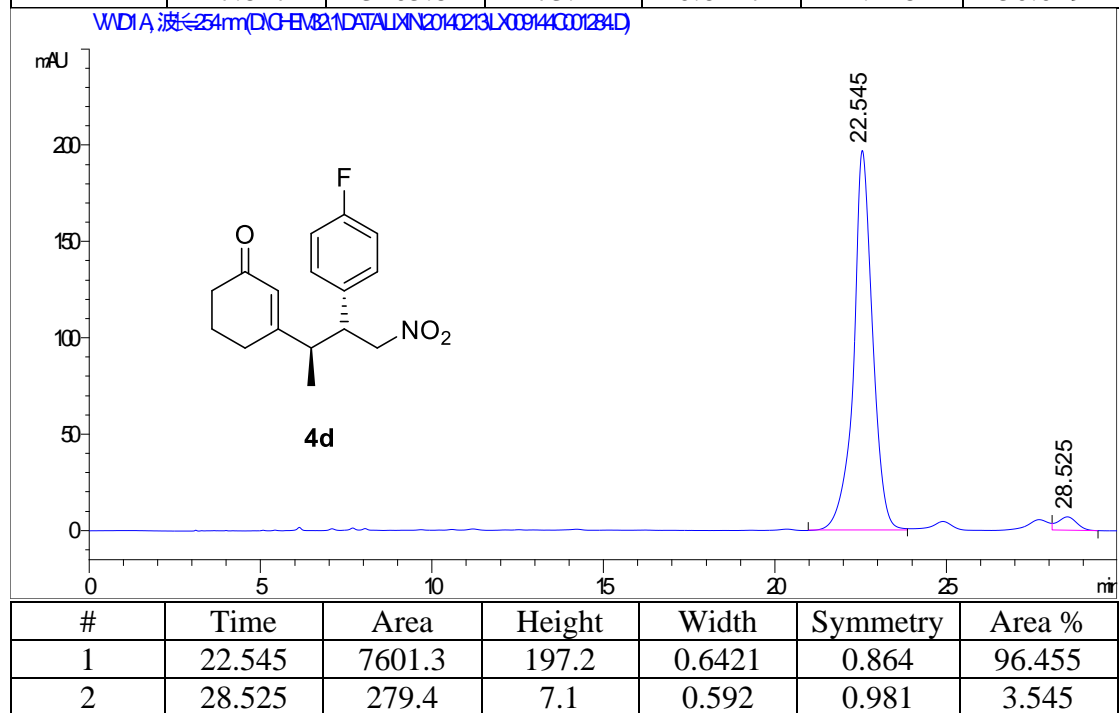

**4e: 3-((2R,3R)-3-(4-chlorophenyl)-4-nitrobutan-2-yl)cyclohex-2-en-1-one**

WDIA, 波長=254nm(DIC-EM&1DATA\LXN20140213LX009118201287.D)

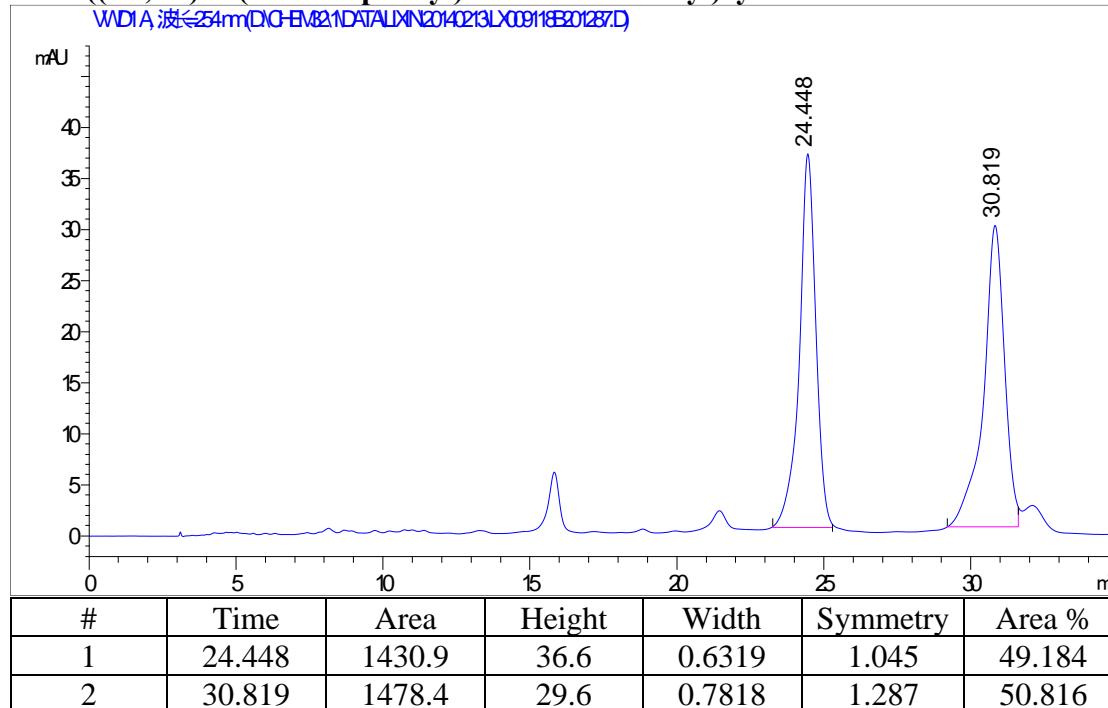

WDIA, 波長=254nm(DIC-EM&1DATA\LXN20140213LX009144001289.D)

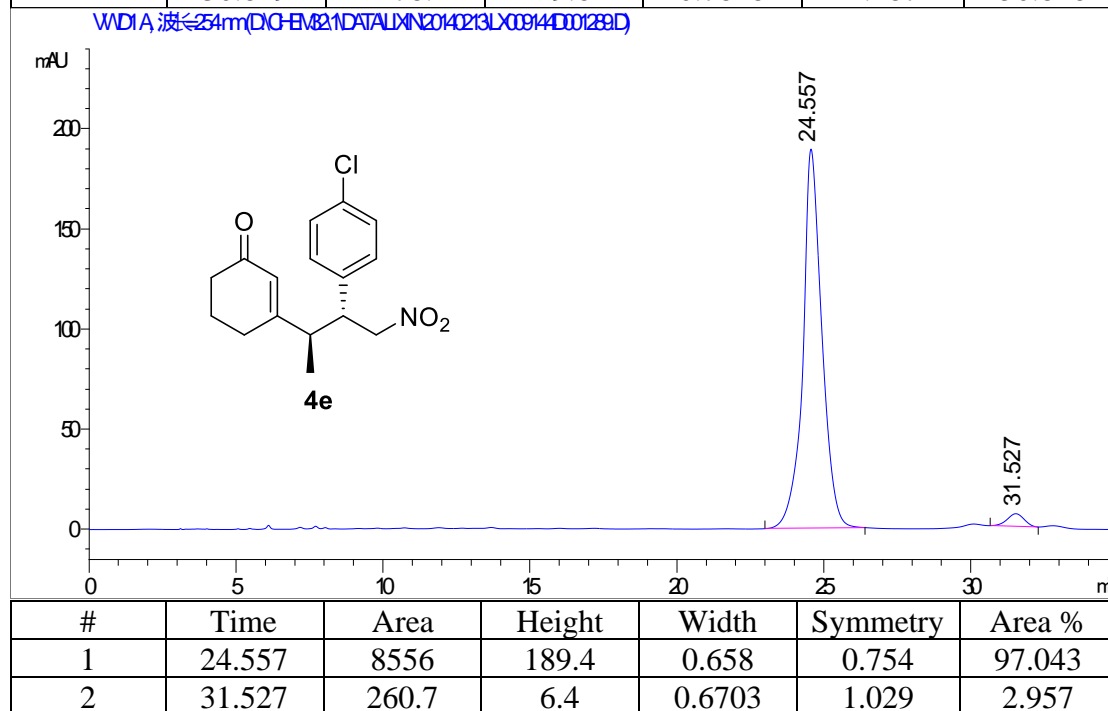

**4f: 3-((2R,3R)-3-(4-bromophenyl)-4-nitrobutan-2-yl)cyclohex-2-en-1-one**

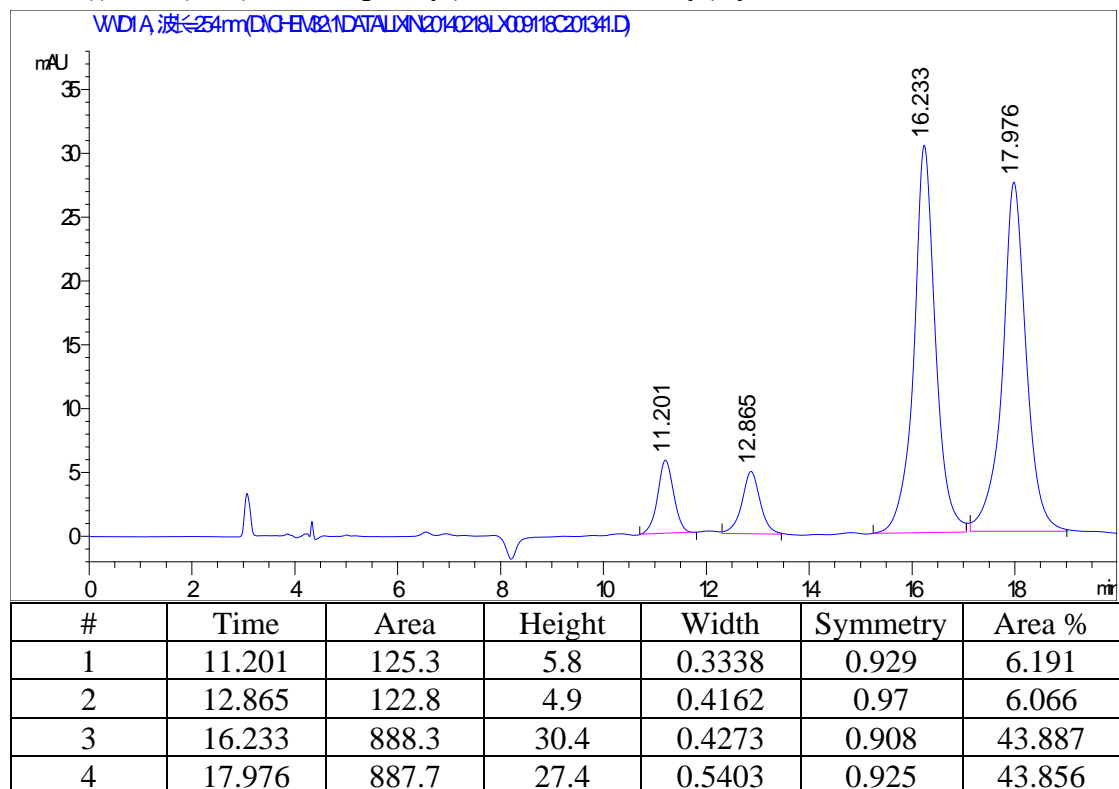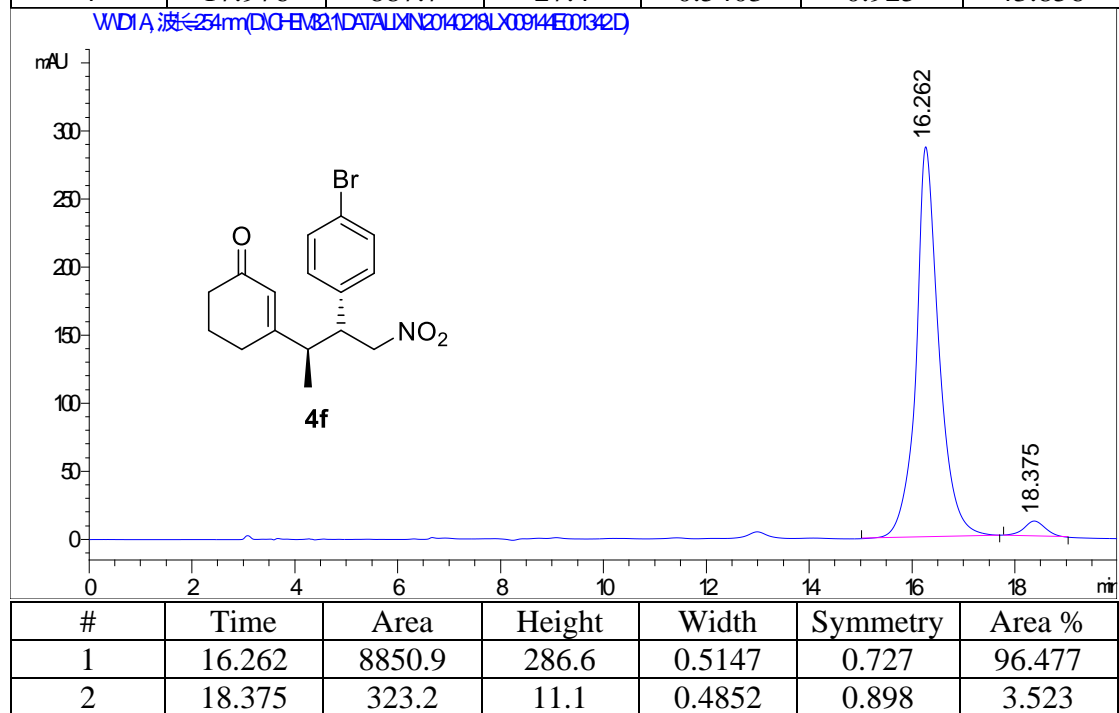

**4g: 3-((2R,3R)-4-nitro-3-(3-nitrophenyl)butan-2-yl)cyclohex-2-en-1-one**

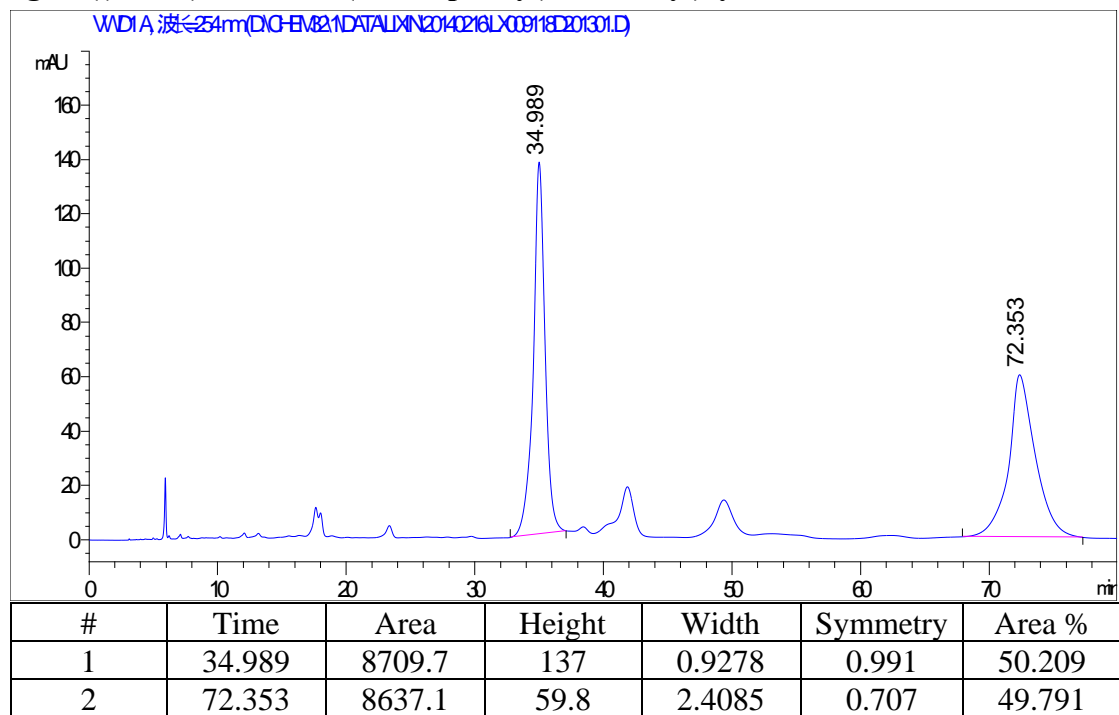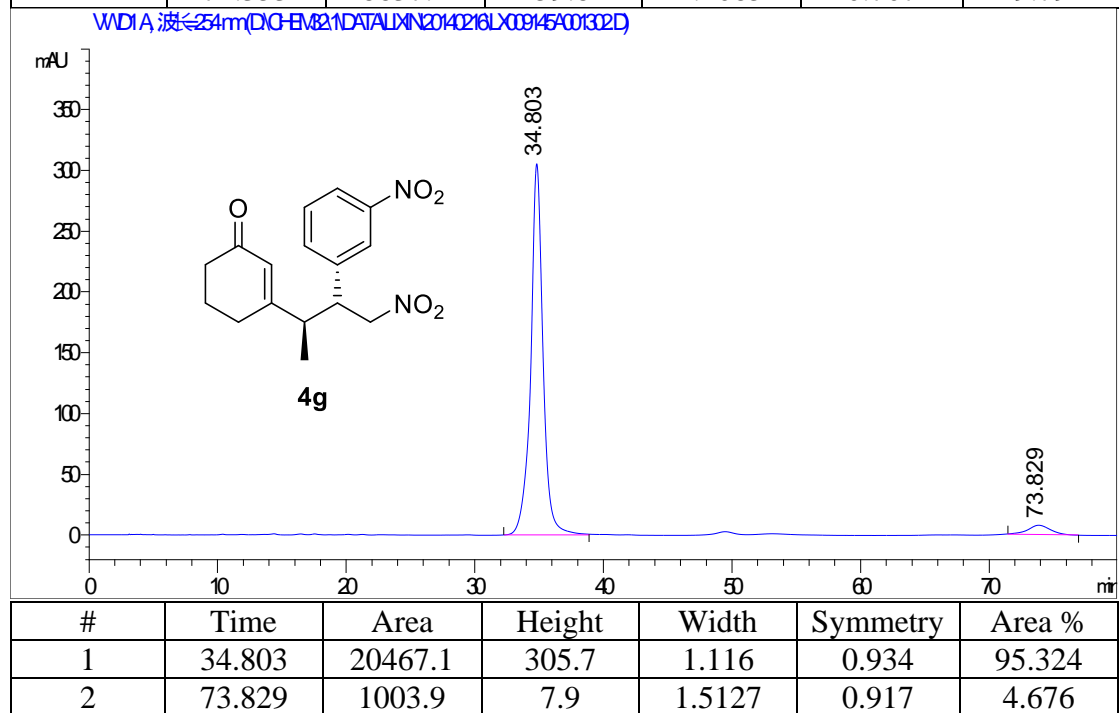



**4h: 3-((2R,3R)-3-(naphthalen-2-yl)-4-nitrobutan-2-yl)cyclohex-2-en-1-one**

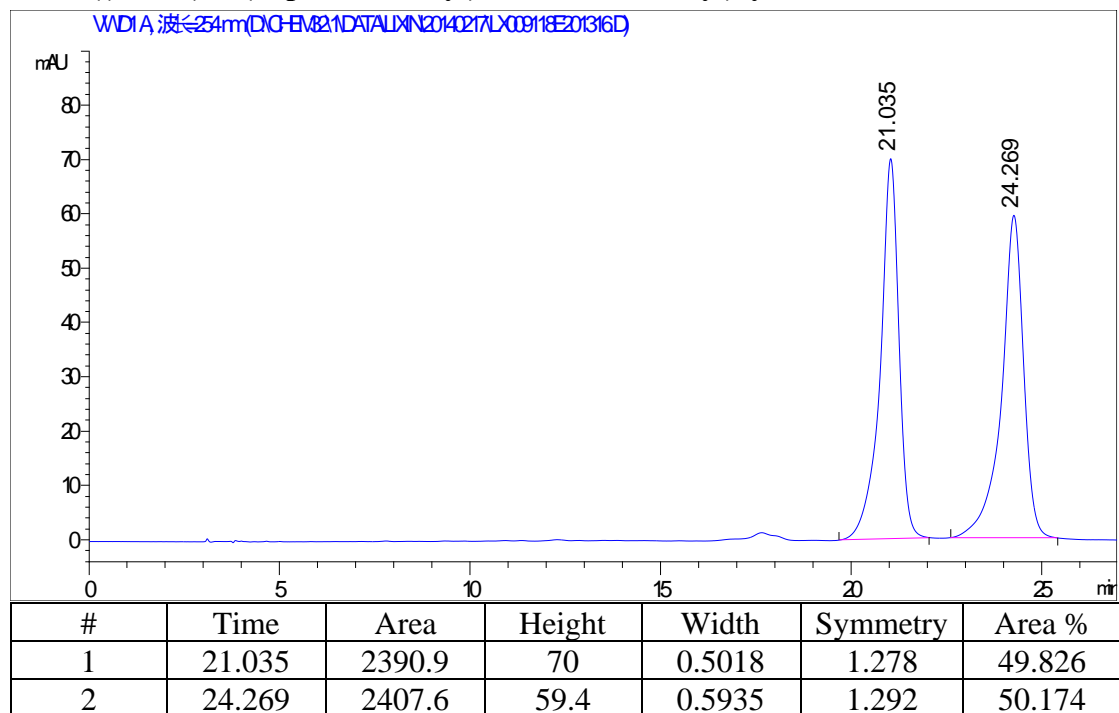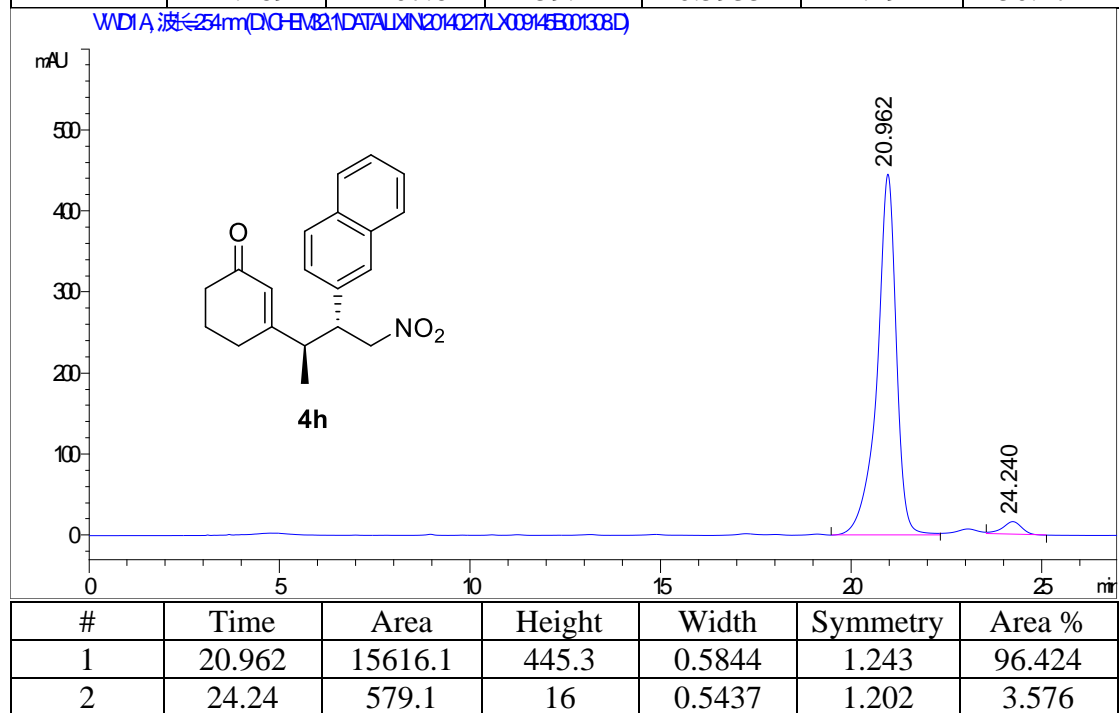

**4i: 3-((2R,3S)-3-(furan-2-yl)-4-nitrobutan-2-yl)cyclohex-2-en-1-one**

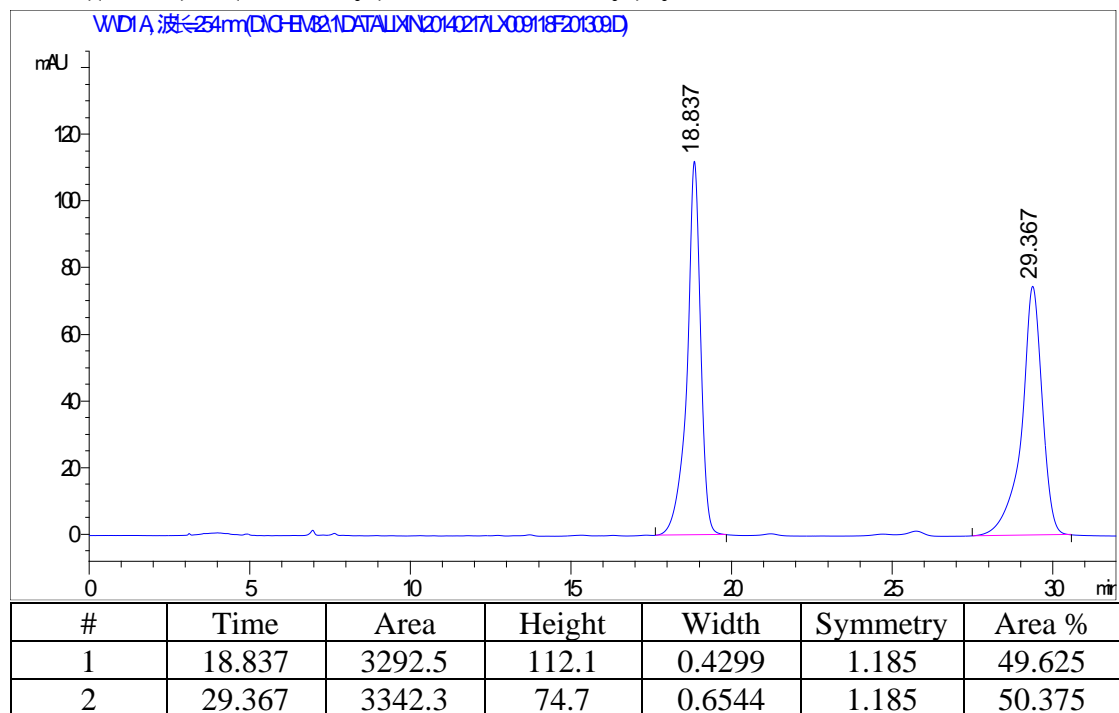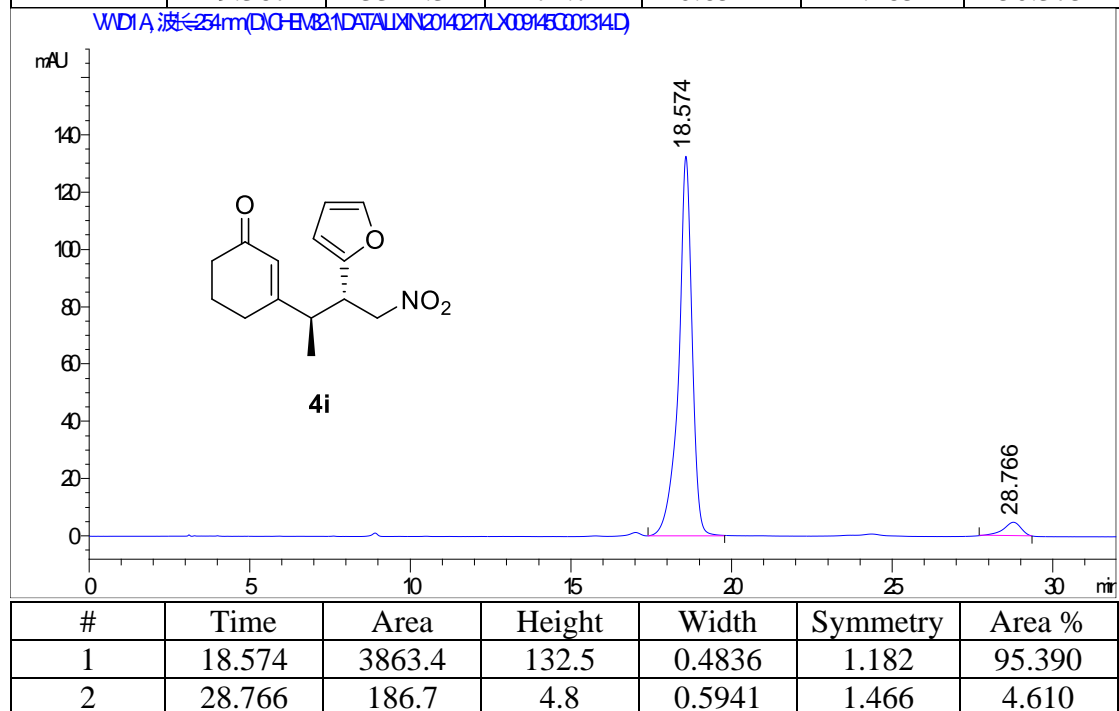

**4j:3-((2R,3R)-1-nitro-2-phenylpentan-3-yl)cyclohex-2-en-1-one**

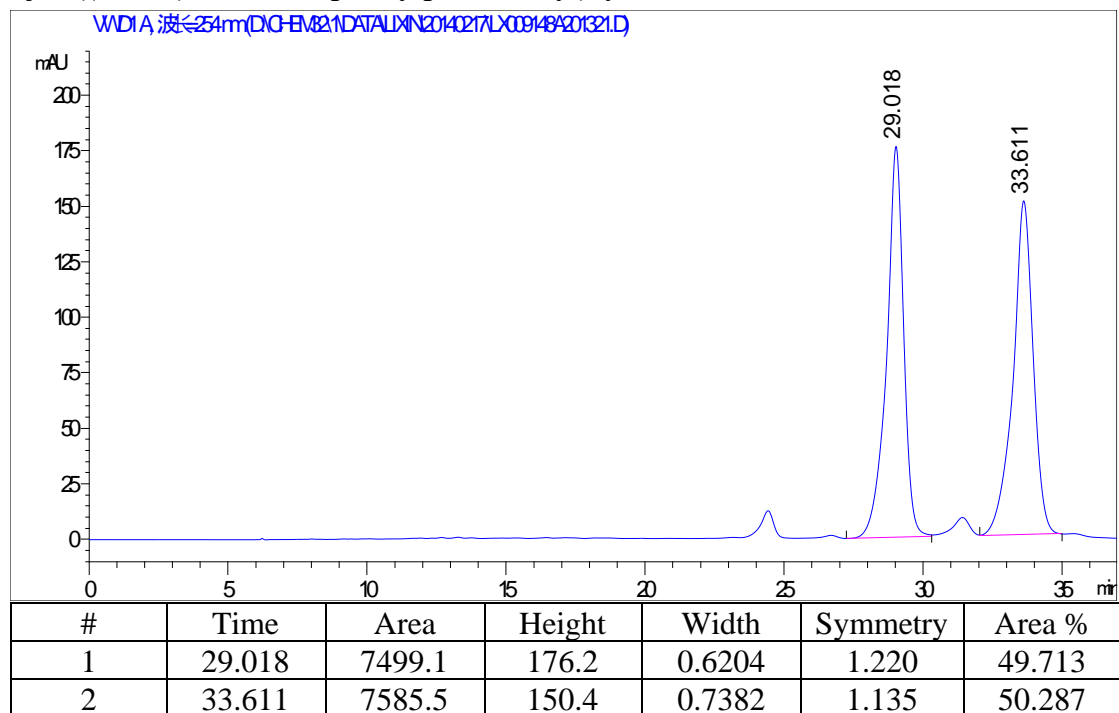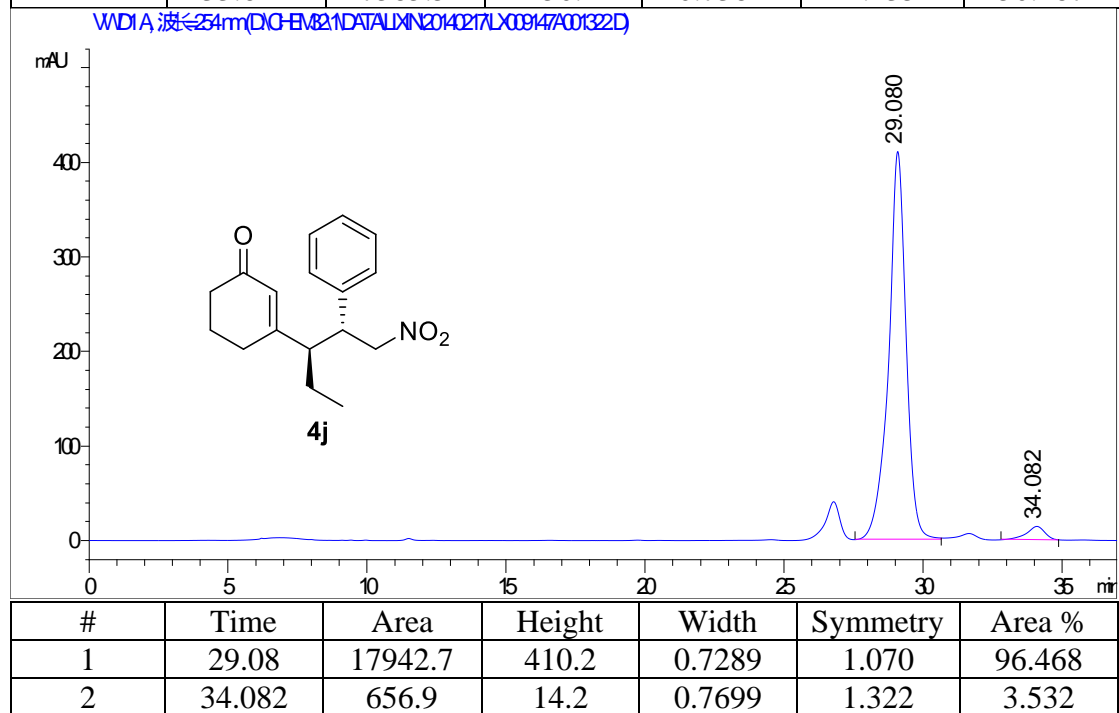

**4k: 3-((2R,3R)-1-nitro-2-phenylhexan-3-yl)cyclohex-2-en-1-one**

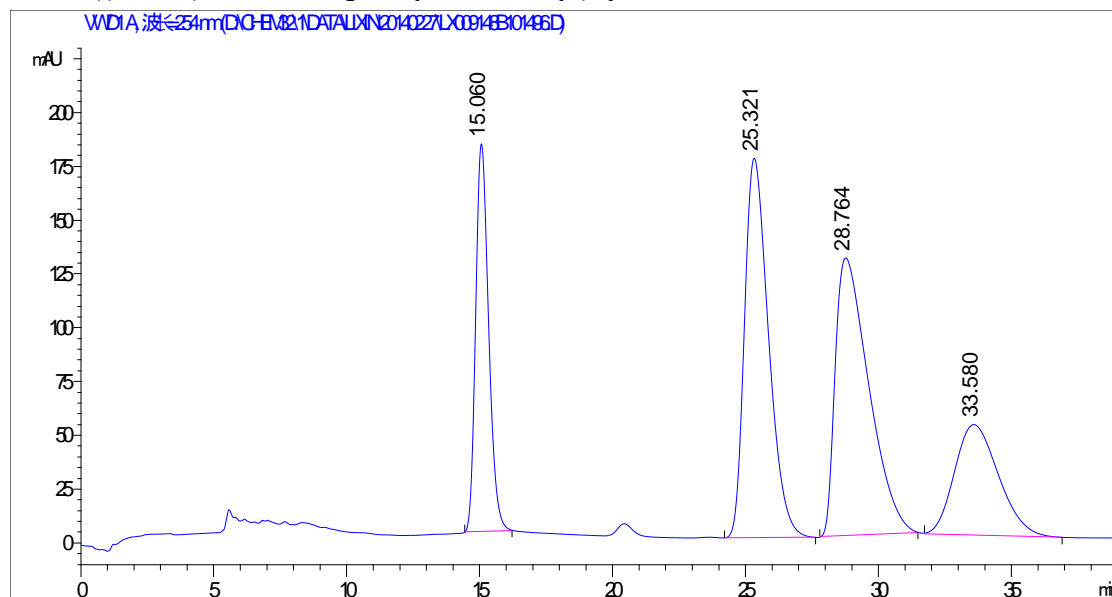

| # | Time   | Area    | Height | Width  | Symmetry | Area % |
|---|--------|---------|--------|--------|----------|--------|
| 1 | 15.06  | 6093.1  | 180.1  | 0.5639 | 0.761    | 17.705 |
| 2 | 25.321 | 11086.5 | 176.4  | 0.9678 | 0.638    | 32.214 |
| 3 | 28.764 | 11312   | 129    | 1.4613 | 0.443    | 32.870 |
| 4 | 33.58  | 5923.2  | 51.4   | 1.9195 | 0.758    | 17.211 |

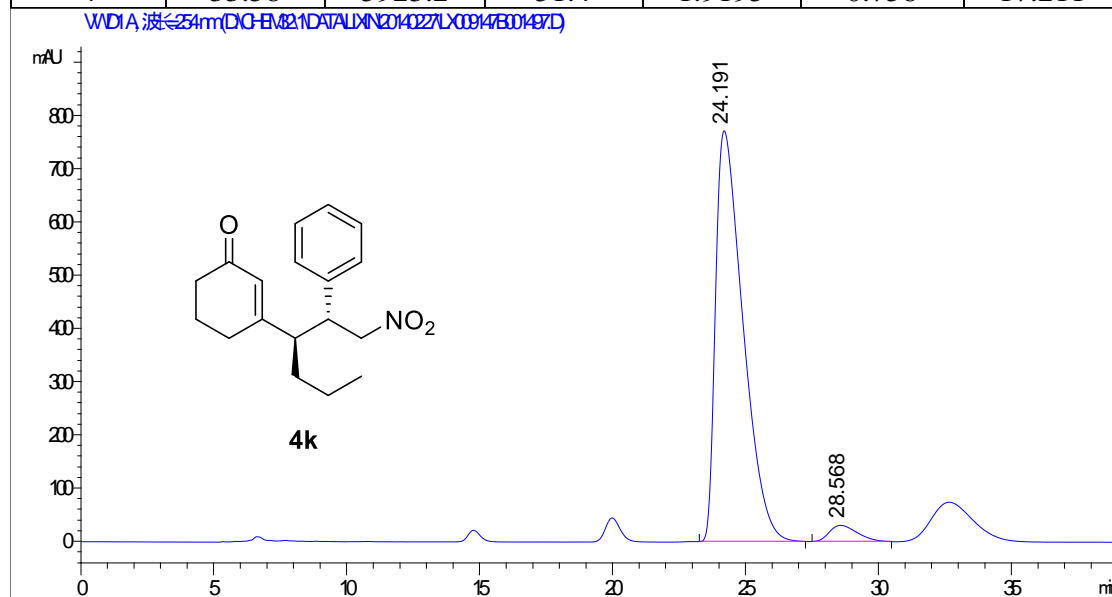

| # | Time   | Area    | Height | Width  | Symmetry | Area % |
|---|--------|---------|--------|--------|----------|--------|
| 1 | 24.191 | 55202.1 | 771.4  | 1.1926 | 0.445    | 96.110 |
| 2 | 28.568 | 2234.5  | 30.5   | 1.222  | 0.649    | 3.890  |

**4I: 3-((2R,3R)-1-nitro-2-phenylheptan-3-yl)cyclohex-2-en-1-one**

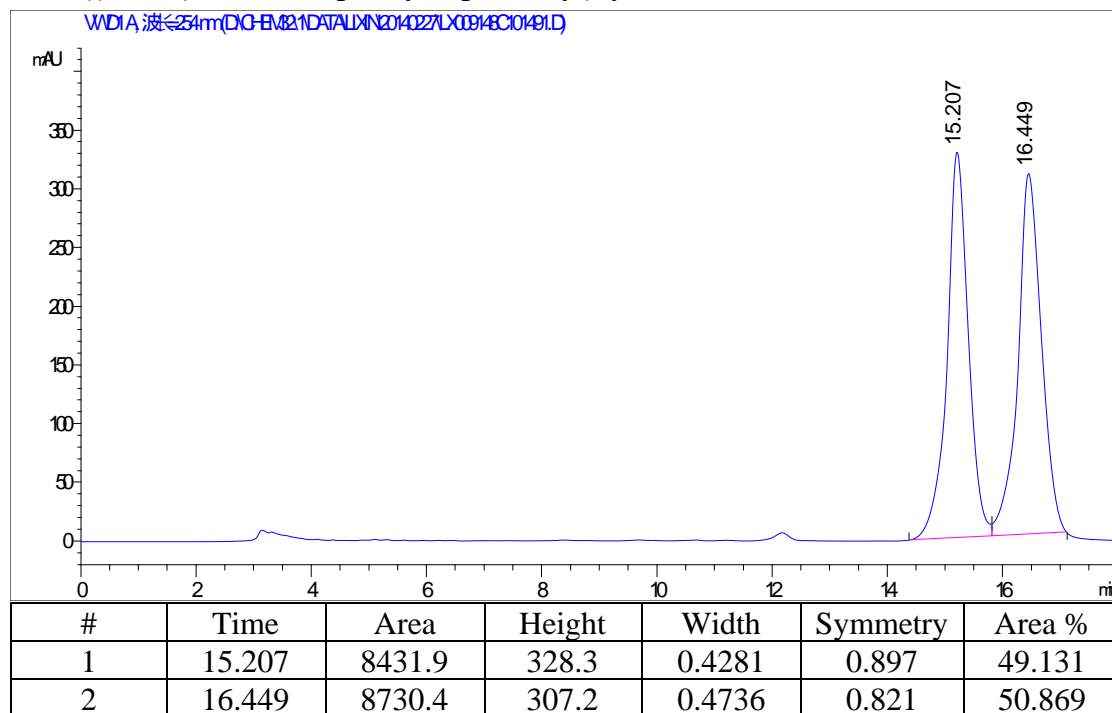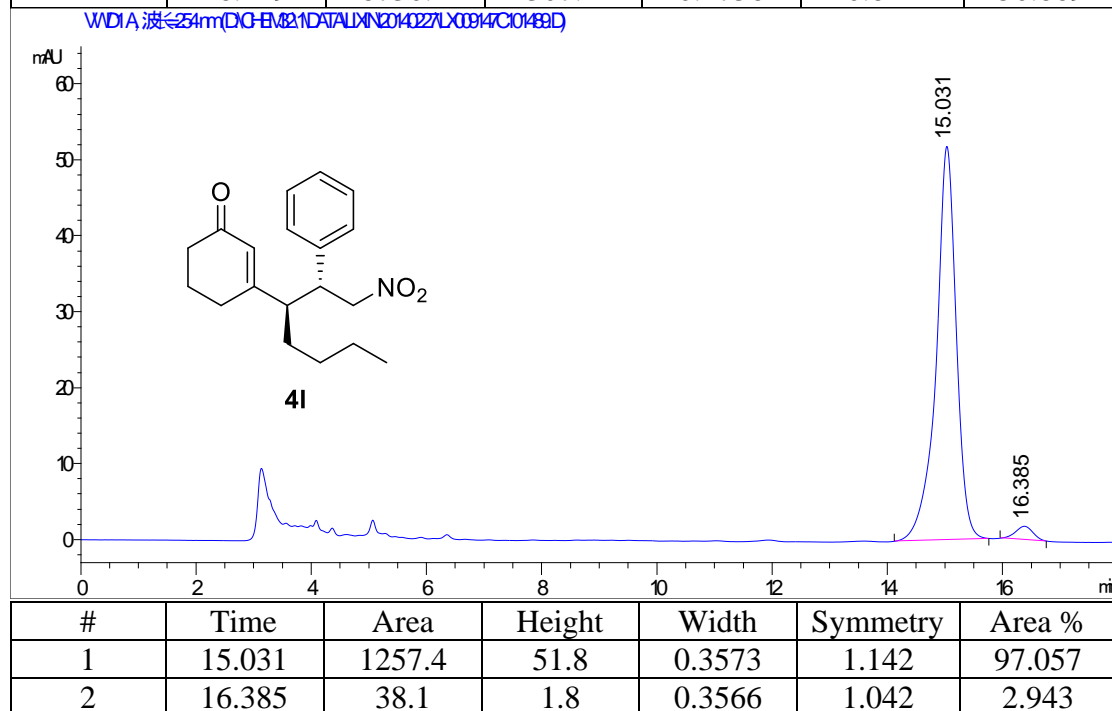

**4m: 3-((2R,3R)-1-nitro-2-phenyloctan-3-yl)cyclohex-2-en-1-one**

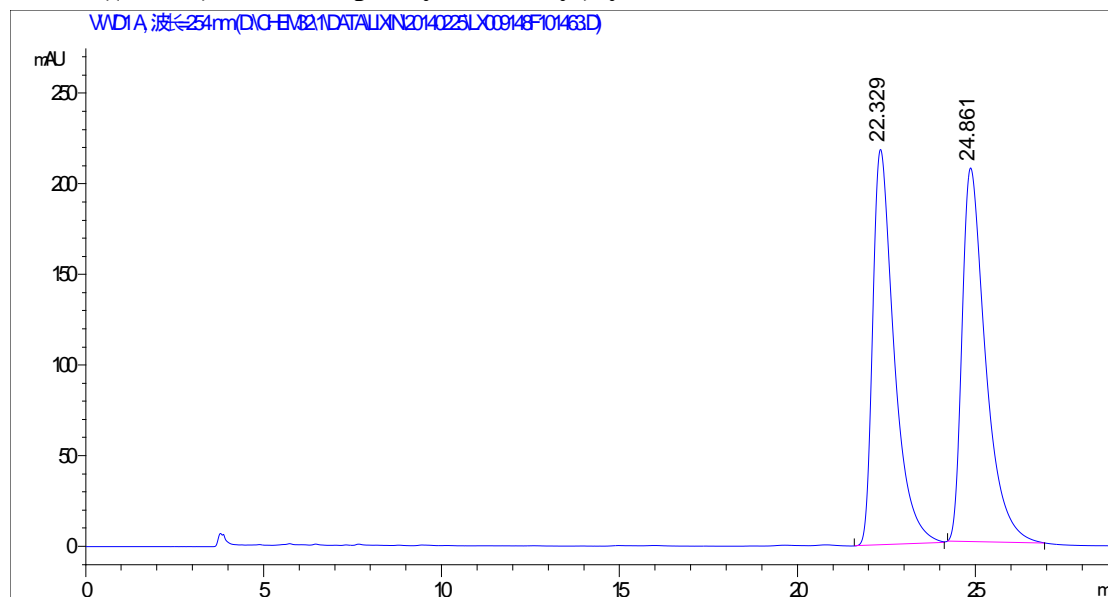

| # | Time   | Area   | Height | Width  | Symmetry | Area % |
|---|--------|--------|--------|--------|----------|--------|
| 1 | 22.329 | 9121.1 | 218.3  | 0.6964 | 0.548    | 49.053 |
| 2 | 24.861 | 9473.3 | 206.3  | 0.7655 | 0.547    | 50.947 |

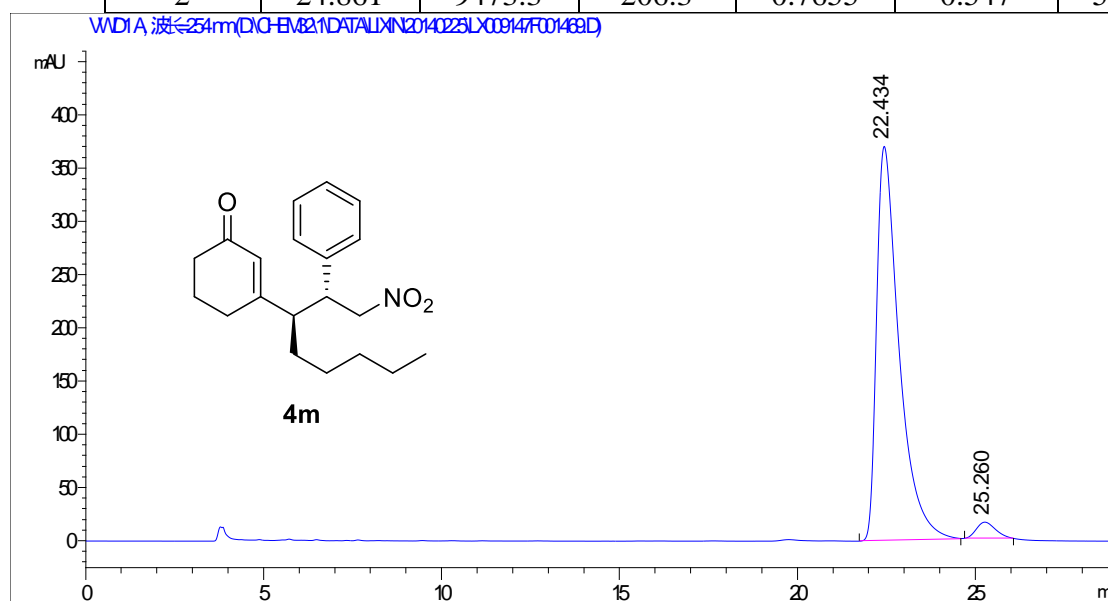

| # | Time   | Area  | Height | Width  | Symmetry | Area % |
|---|--------|-------|--------|--------|----------|--------|
| 1 | 22.434 | 16257 | 370.1  | 0.7321 | 0.488    | 96.495 |
| 2 | 25.26  | 590.5 | 15.5   | 0.6367 | 0.766    | 3.505  |

**4n: 3-((1R,2R)-3-nitro-1,2-diphenylpropyl)cyclohex-2-en-1-one**

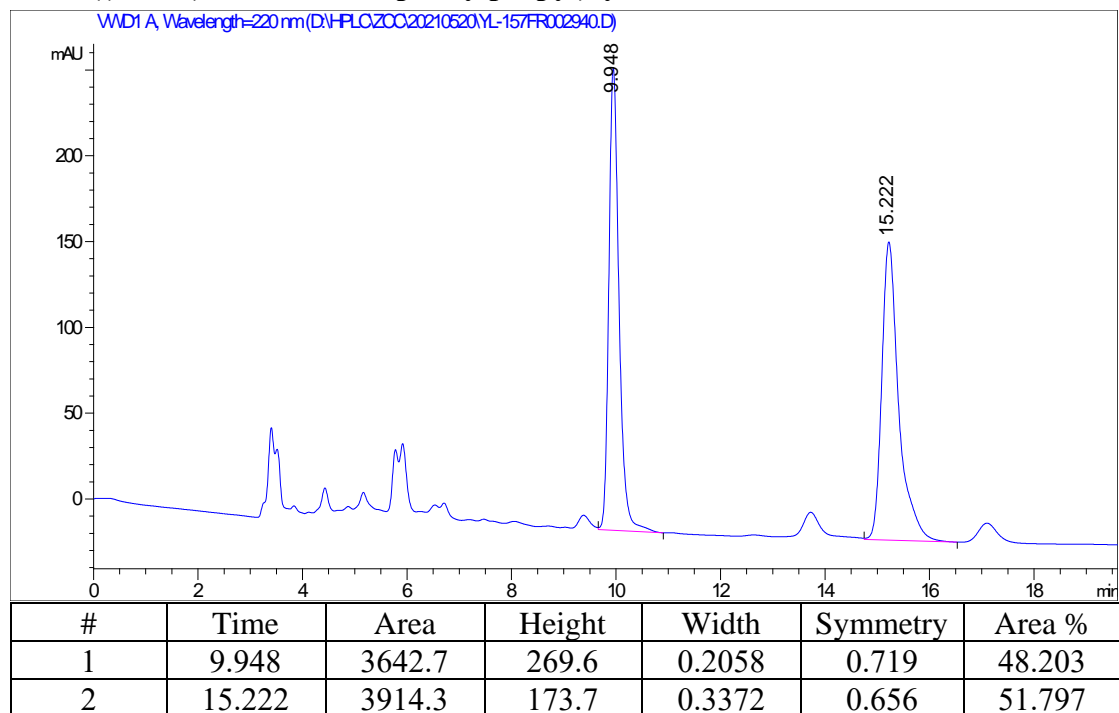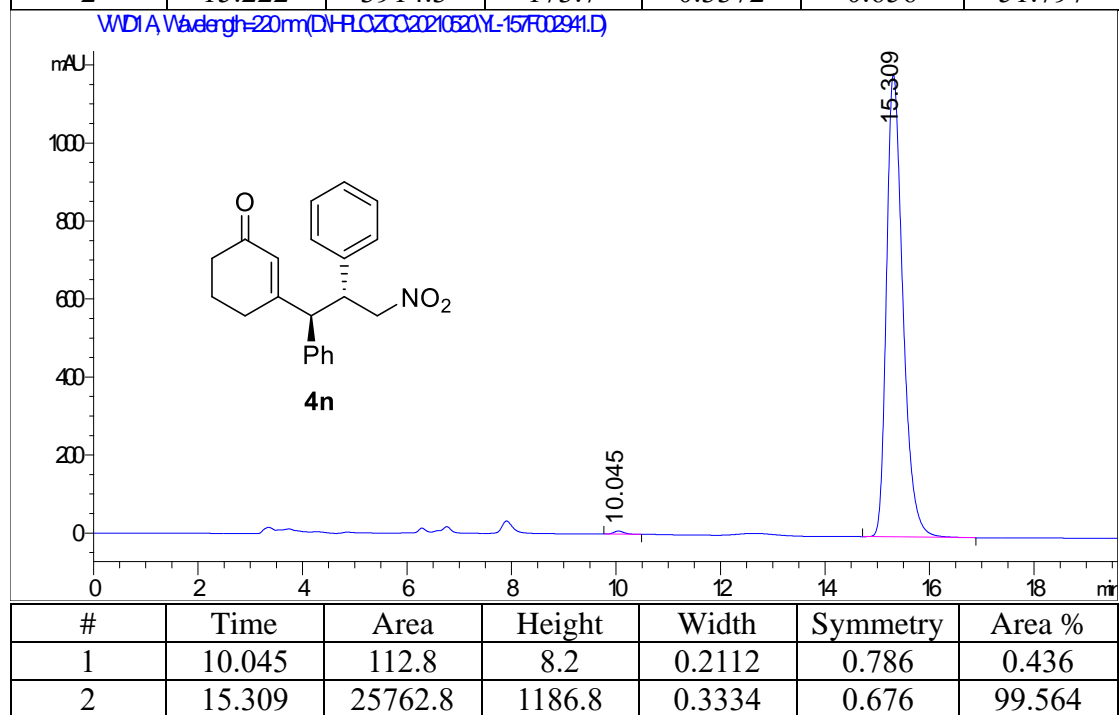

**4o: 3-((2R,3R)-4-nitro-1,3-diphenylbutan-2-yl)cyclohex-2-en-1-one**

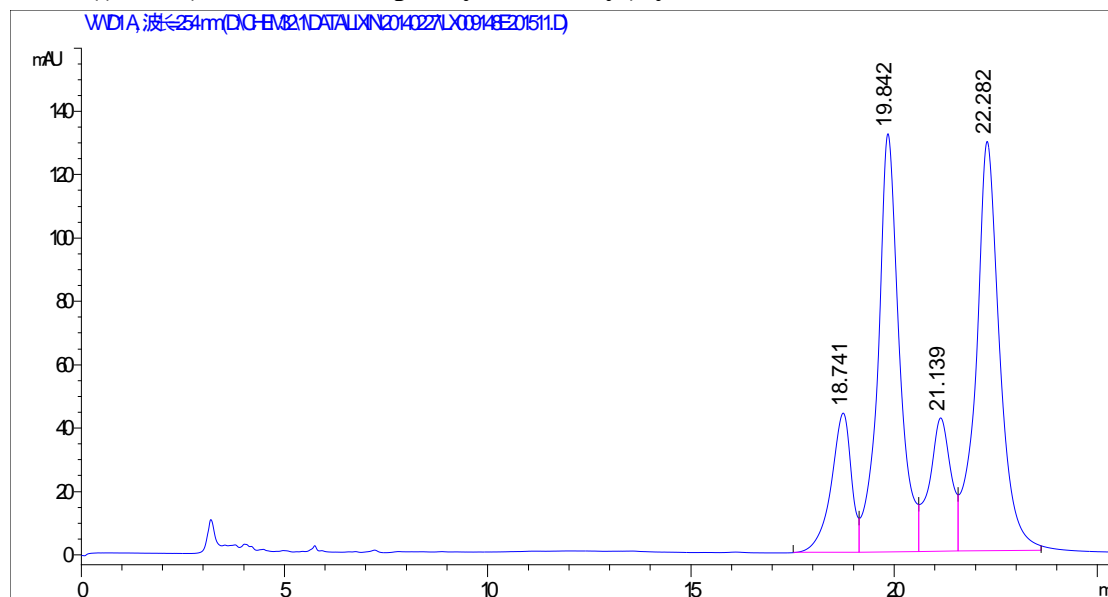

| # | Time   | Area   | Height | Width  | Symmetry | Area % |
|---|--------|--------|--------|--------|----------|--------|
| 1 | 18.741 | 1519.6 | 44     | 0.5169 | 1.475    | 11.593 |
| 2 | 19.842 | 4792.3 | 132    | 0.5225 | 0.857    | 36.560 |
| 3 | 21.139 | 1571.7 | 42.2   | 0.5381 | 1.093    | 11.991 |
| 4 | 22.282 | 5224.2 | 129.3  | 0.6733 | 0.862    | 39.856 |

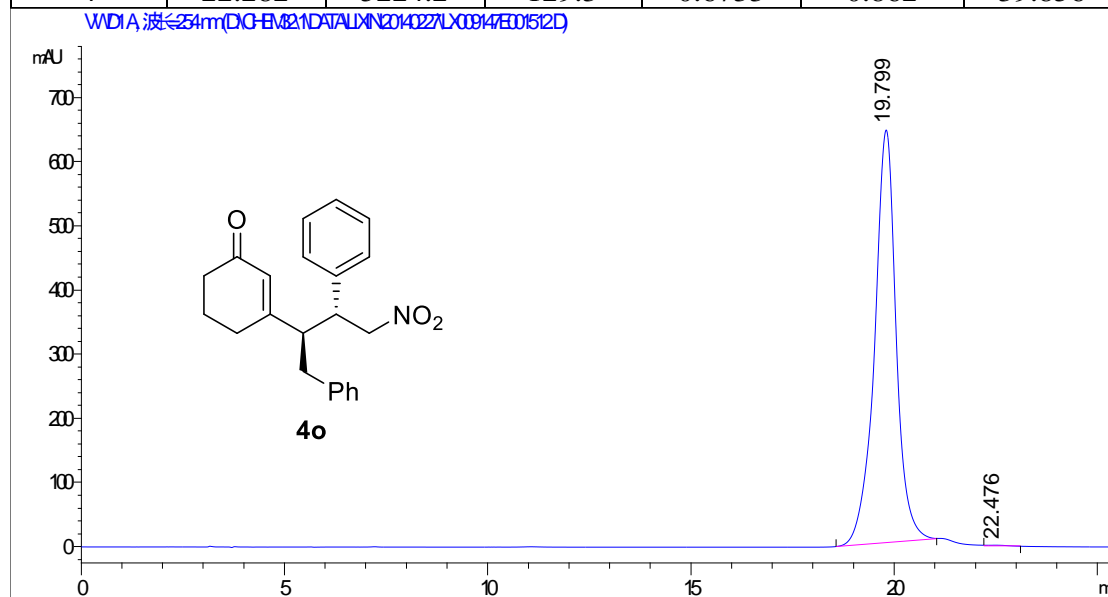

| # | Time   | Area    | Height | Width  | Symmetry | Area % |
|---|--------|---------|--------|--------|----------|--------|
| 1 | 19.799 | 23746.6 | 643.3  | 0.6152 | 1.128    | 99.752 |
| 2 | 22.476 | 58.9    | 1.6    | 0.6104 | 0.730    | 0.248  |



**4p: 3-((2R,3R)-2-(4-bromophenyl)-1-nitrohexan-3-yl)cyclohex-2-en-1-one**

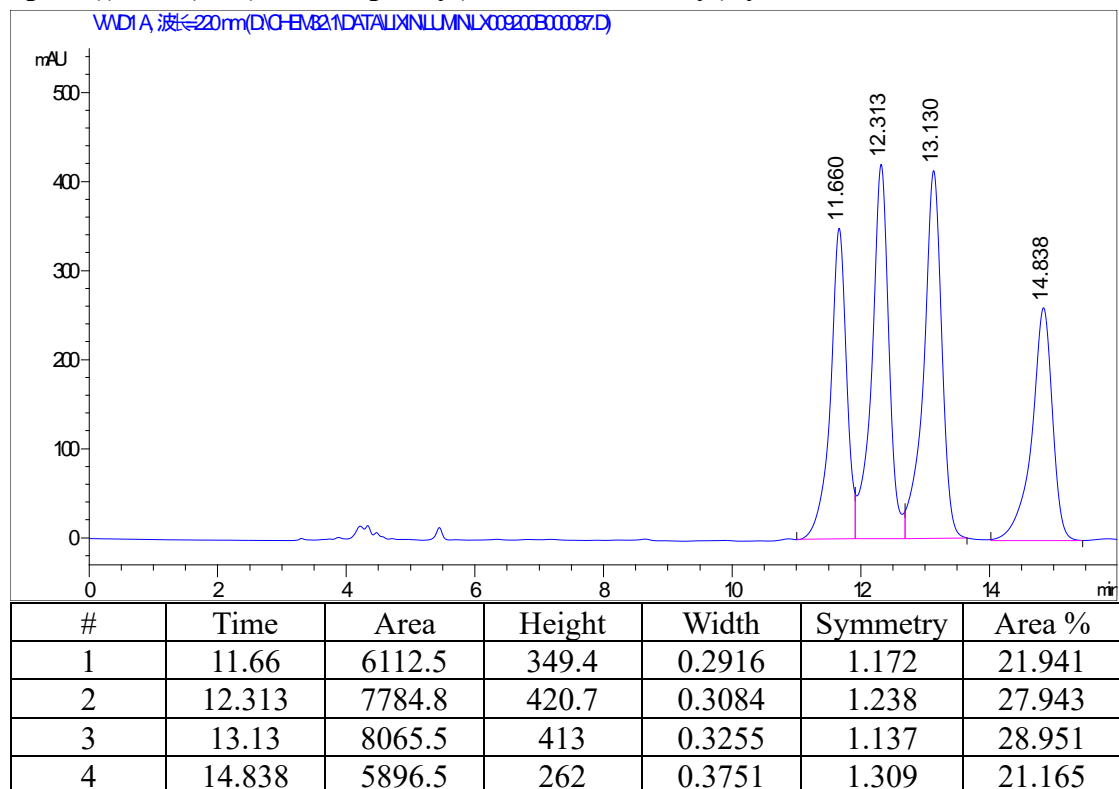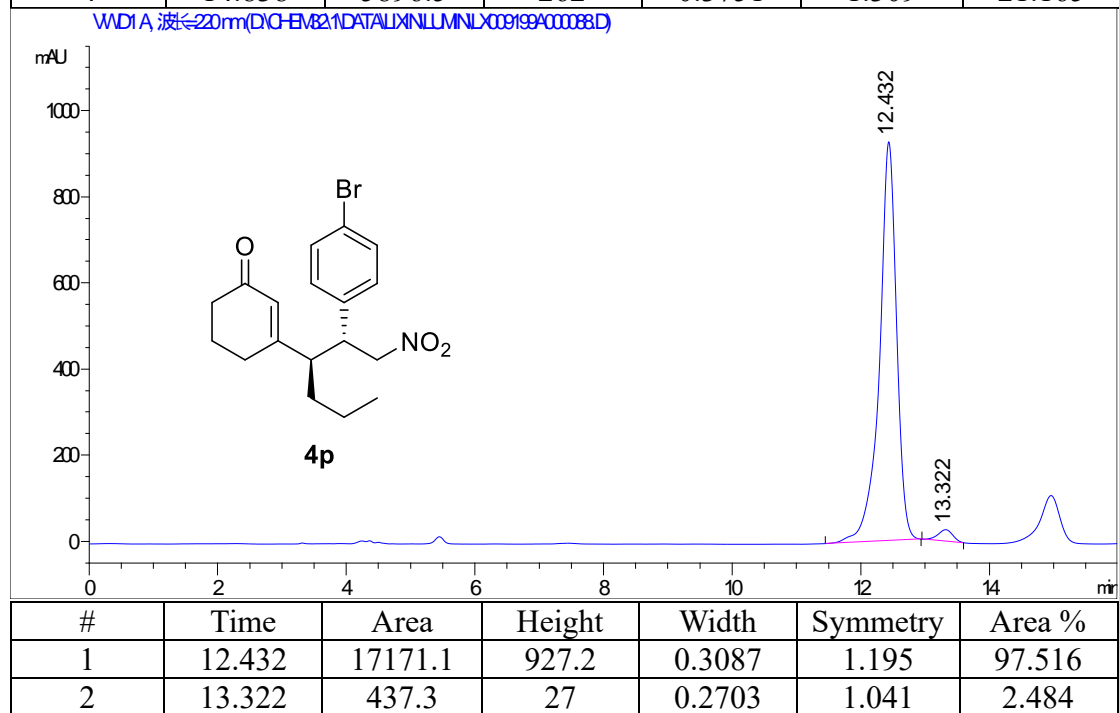

**5a: 3-((2S,3R)-4-nitro-3-phenylbutan-2-yl)cyclohex-2-en-1-one**

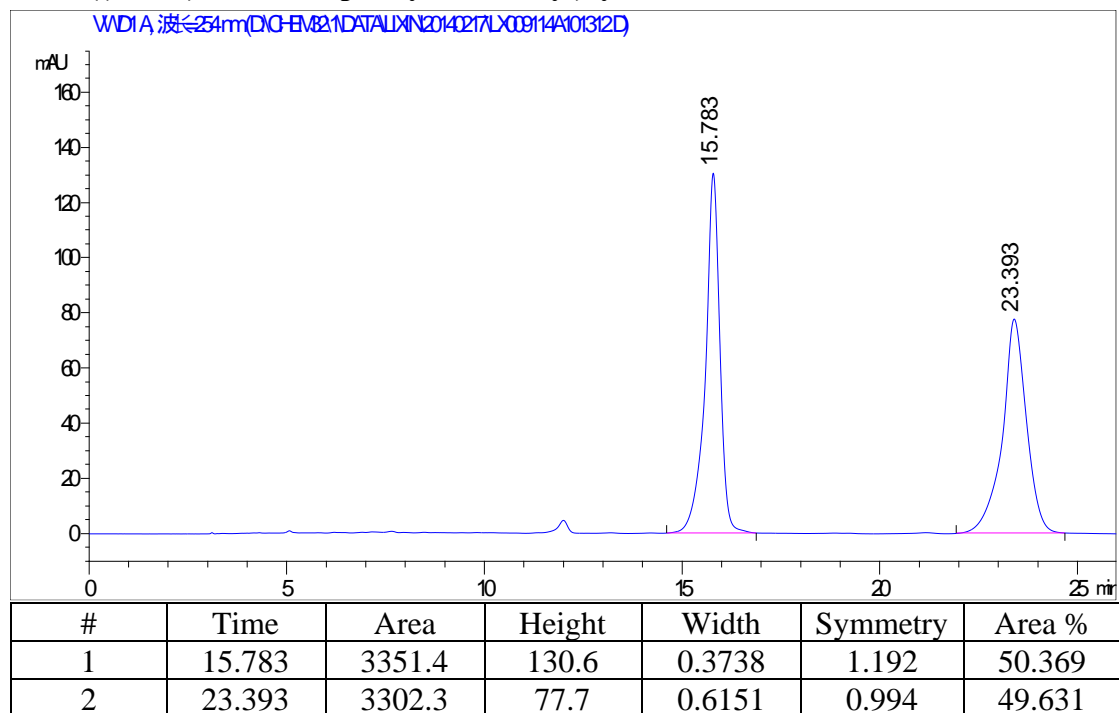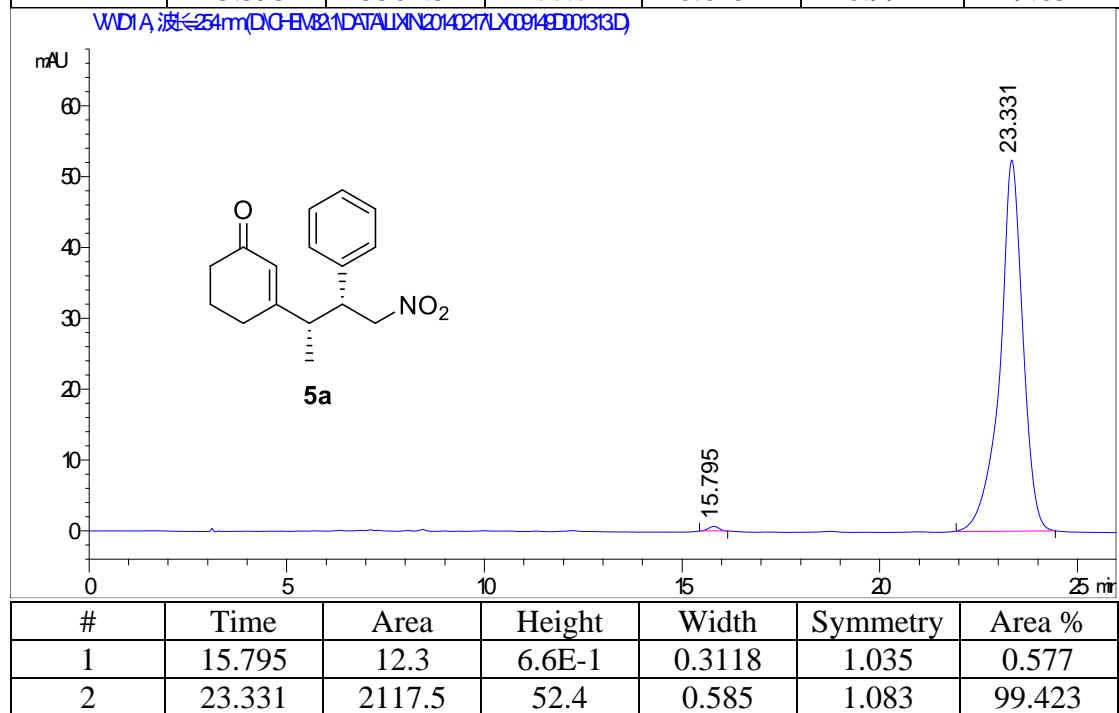

**5b: 3-((2S,3R)-4-nitro-3-(p-tolyl)butan-2-yl)cyclohex-2-en-1-one**

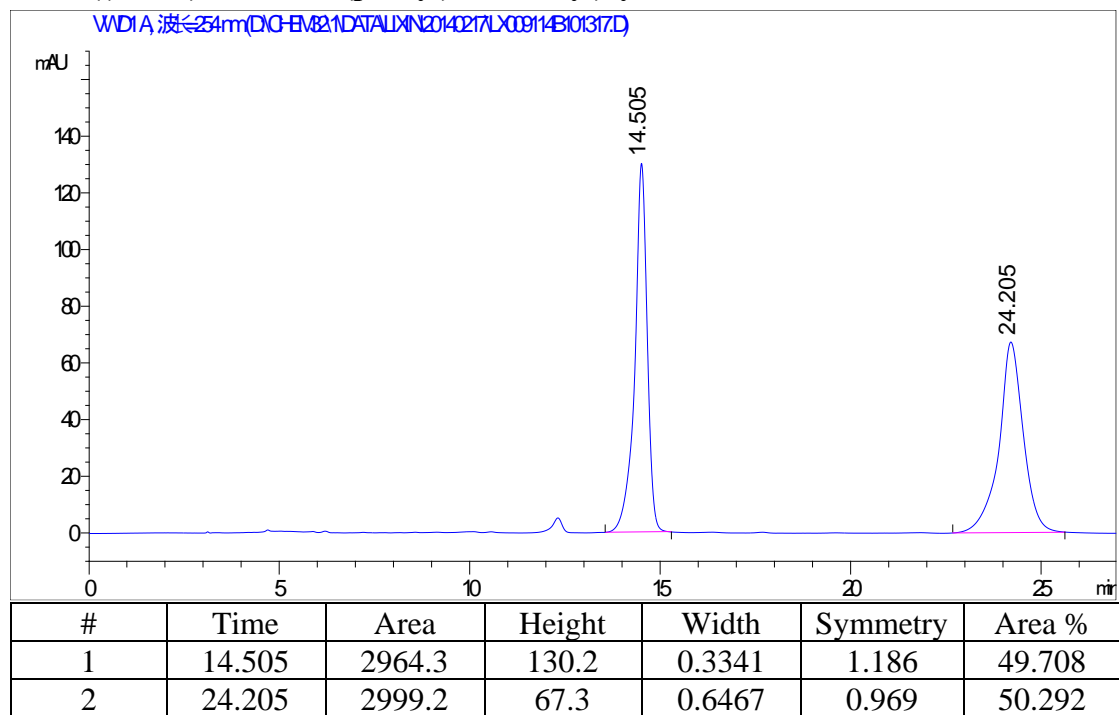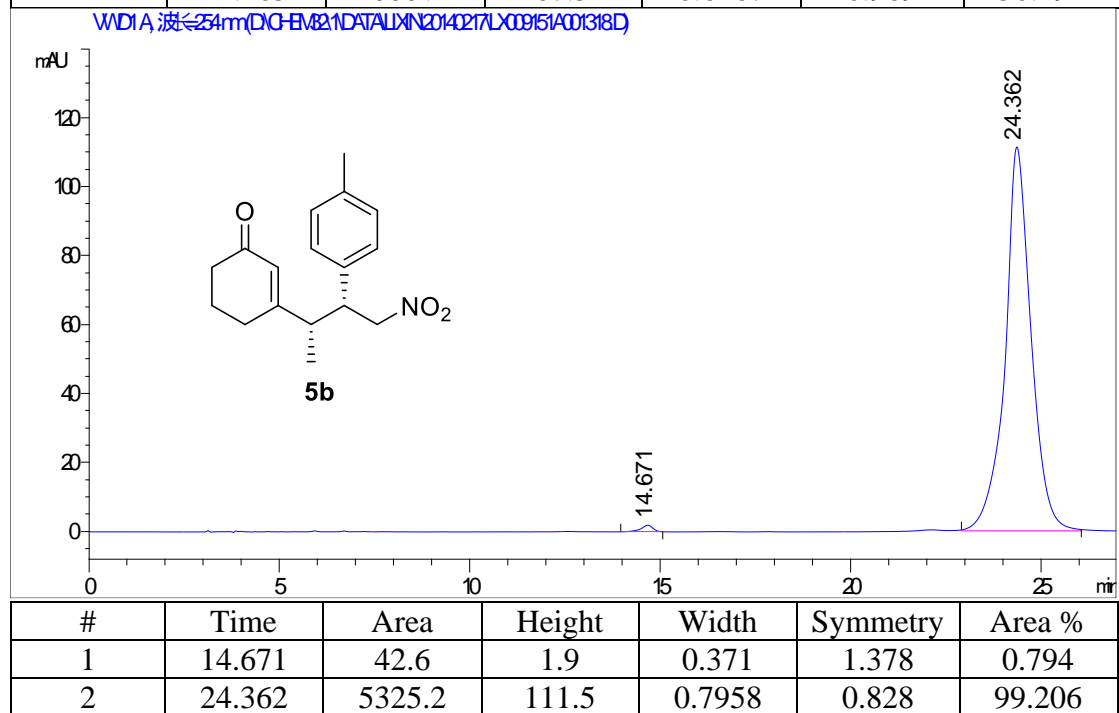

**5c: 3-((2S,3R)-3-(4-methoxyphenyl)-4-nitrobutan-2-yl)cyclohex-2-en-1-one**

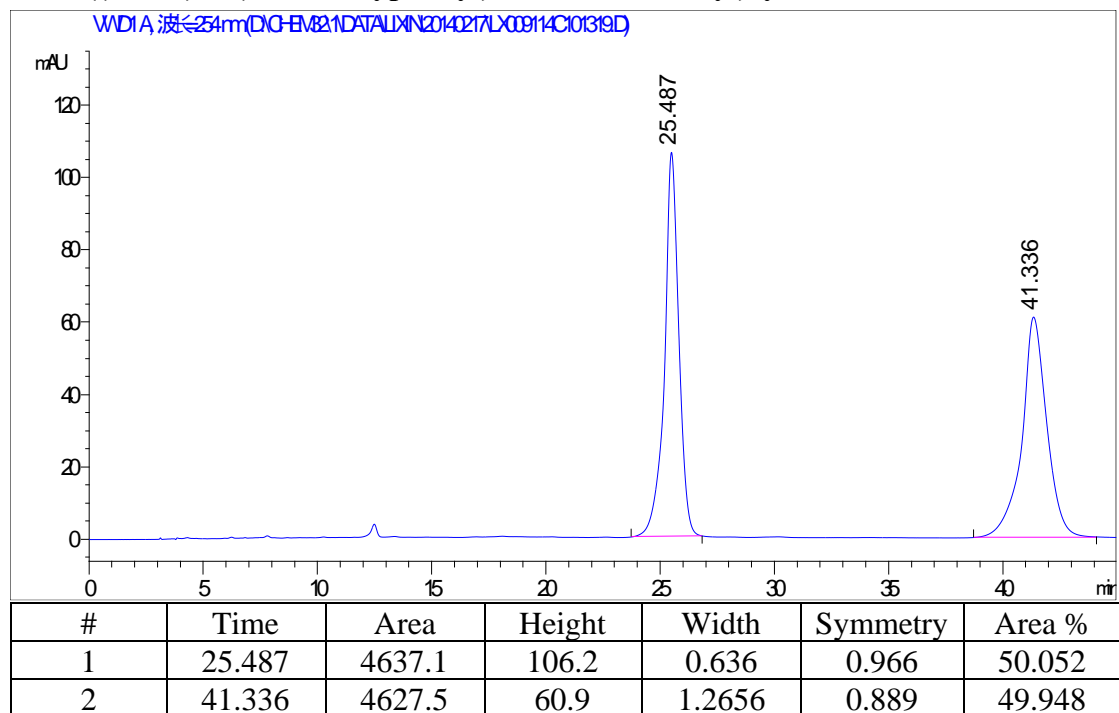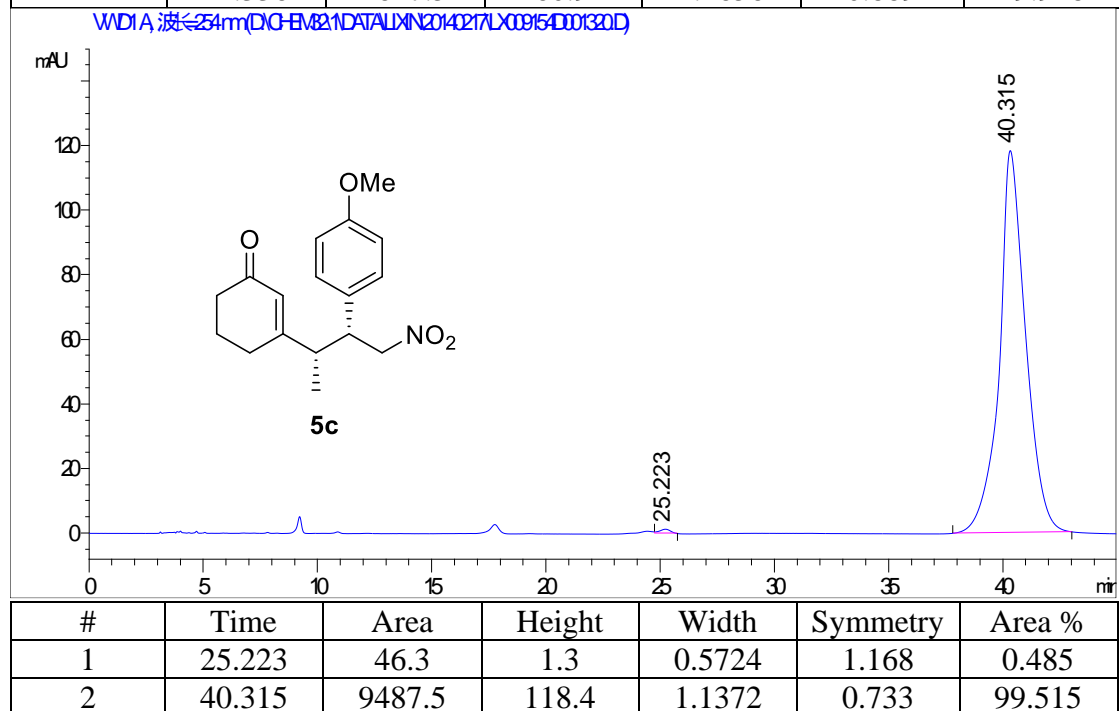

**5d: 3-((2*S*,3*R*)-3-(4-fluorophenyl)-4-nitrobutan-2-yl)cyclohex-2-en-1-one**

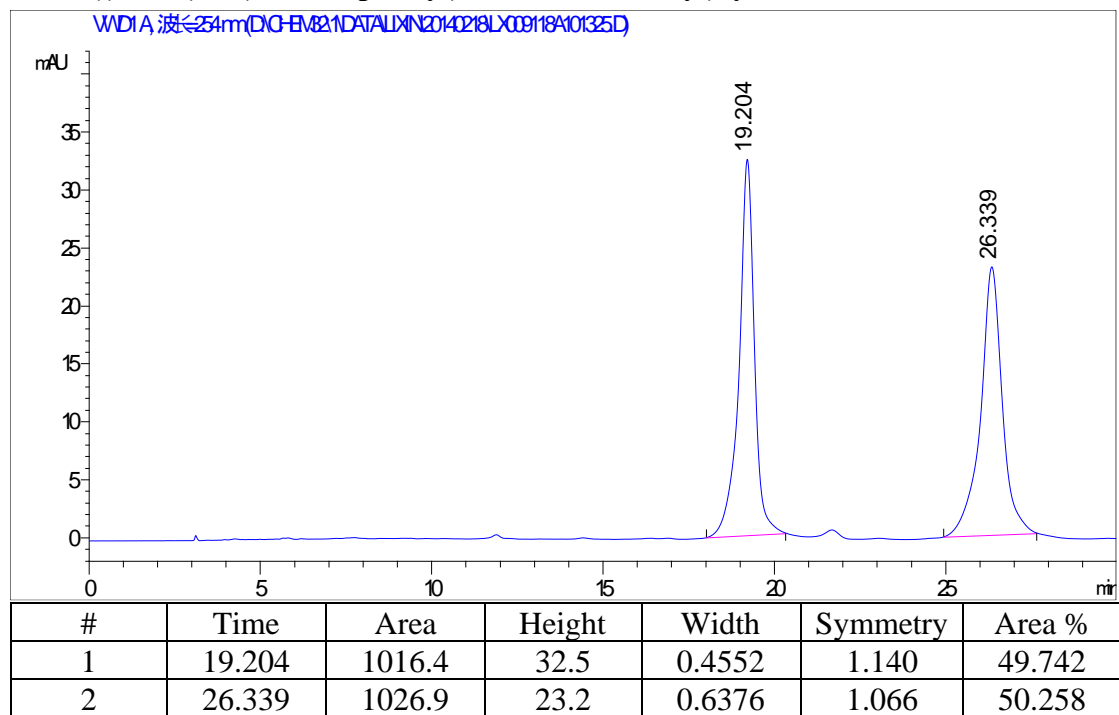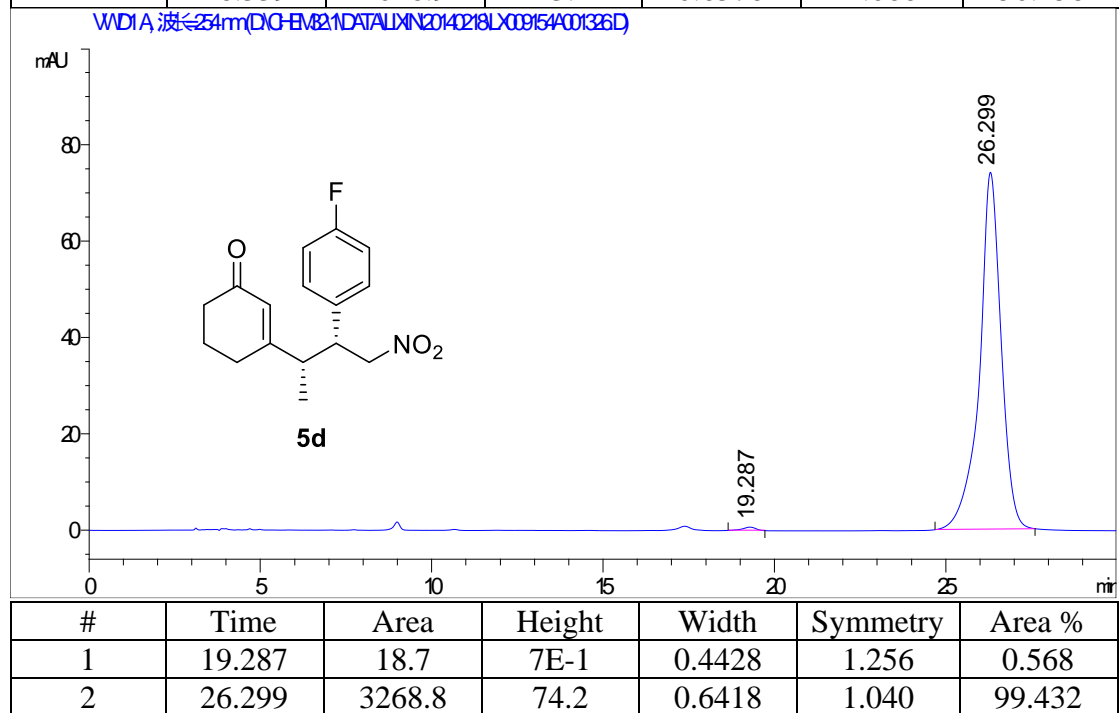

**5e: 3-((2*S*,3*R*)-3-(4-chlorophenyl)-4-nitrobutan-2-yl)cyclohex-2-en-1-one**

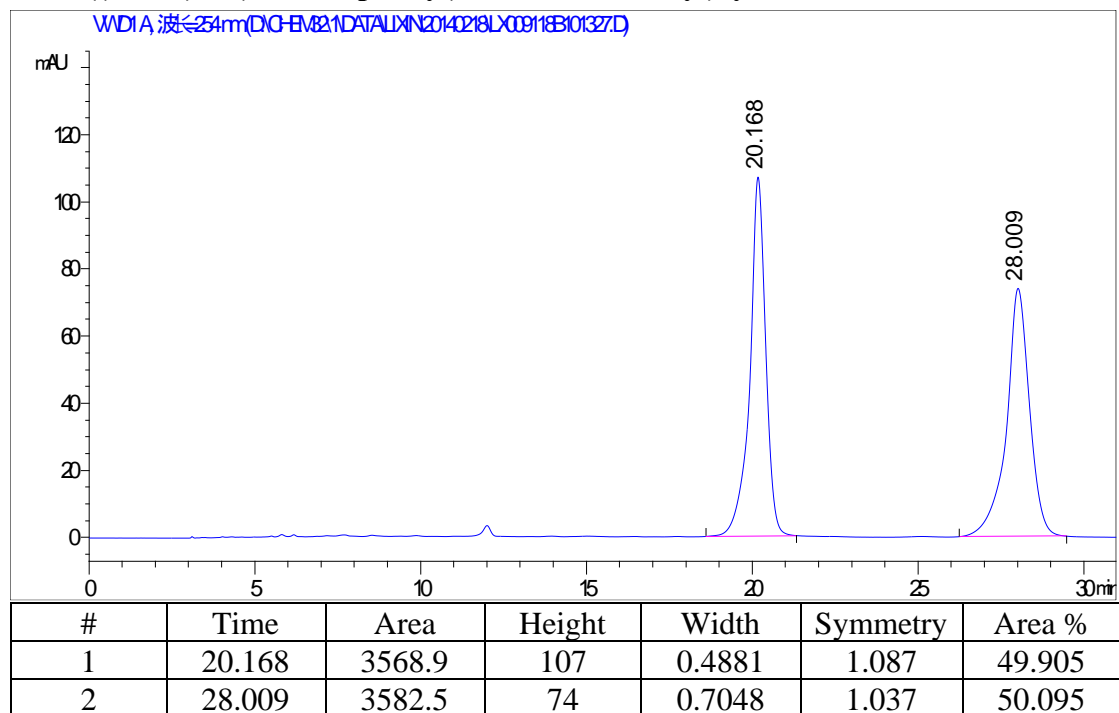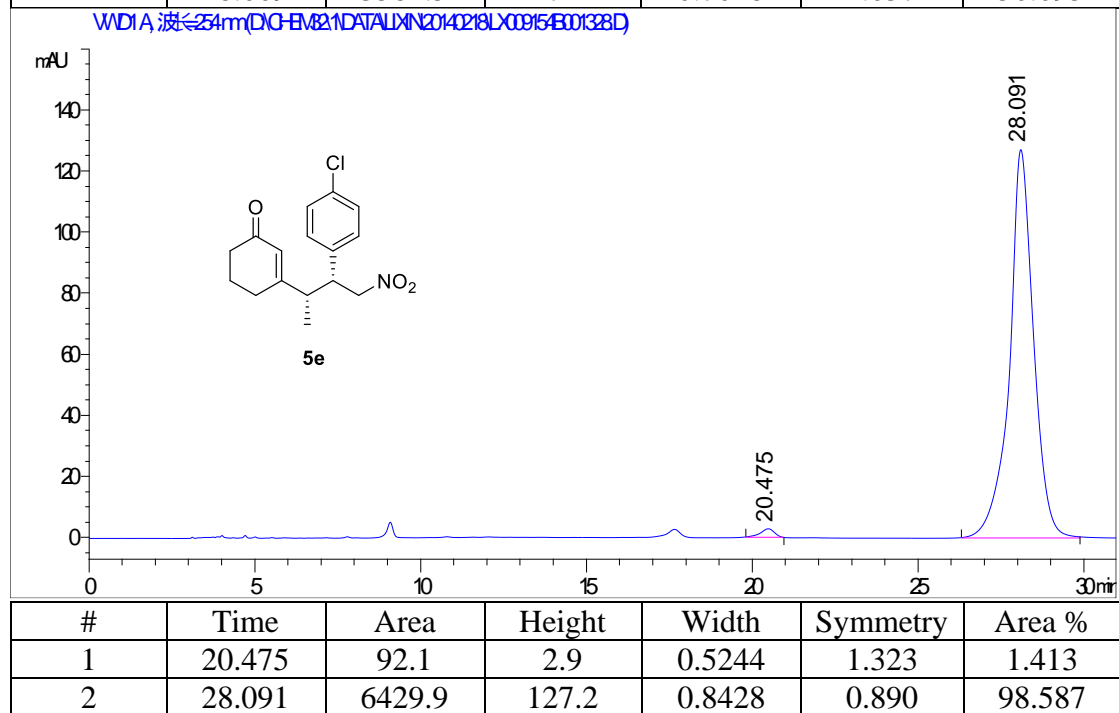

**5f: 3-((2*S*,3*R*)-3-(4-bromophenyl)-4-nitrobutan-2-yl)cyclohex-2-en-1-one**

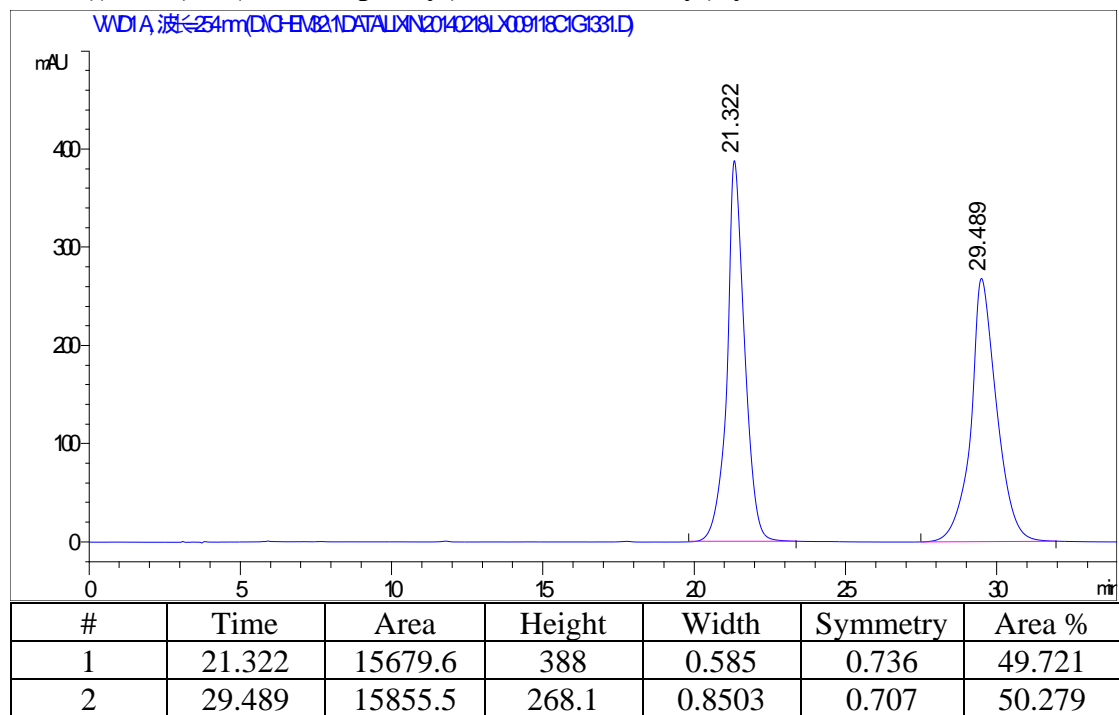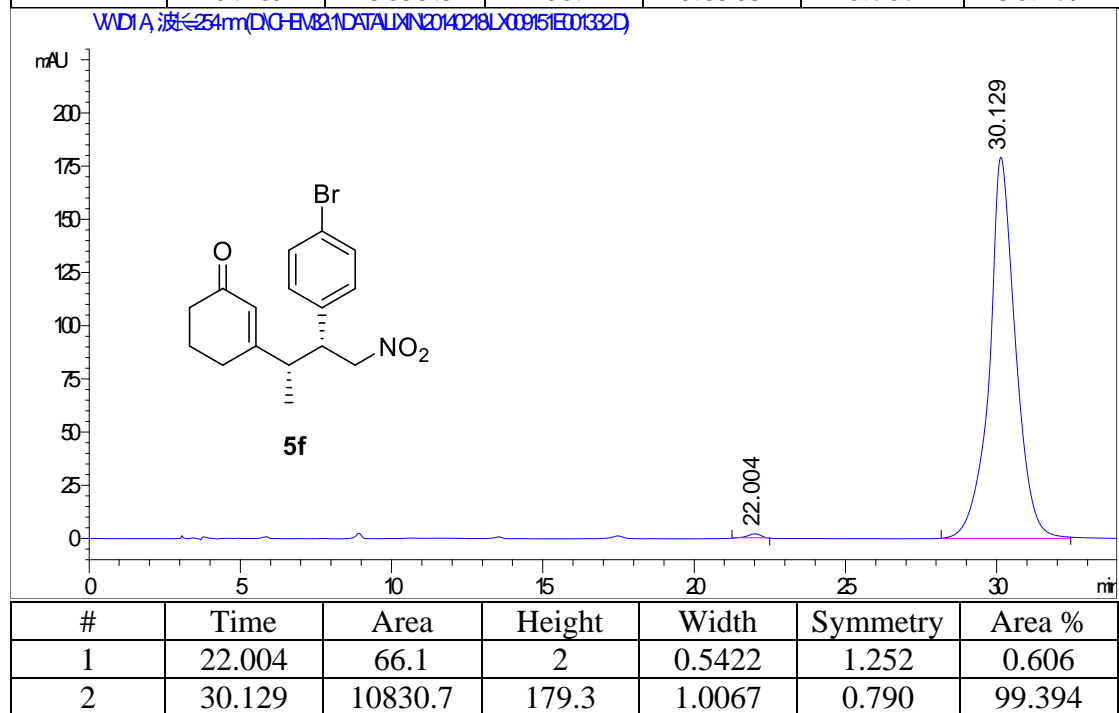

**5g: 3-((2S,3R)-4-nitro-3-(3-nitrophenyl)butan-2-yl)cyclohex-2-en-1-one**

WDIA, 波長=254nm(DIC-EM81DATA\LXN20140218LX009151D101329.D)

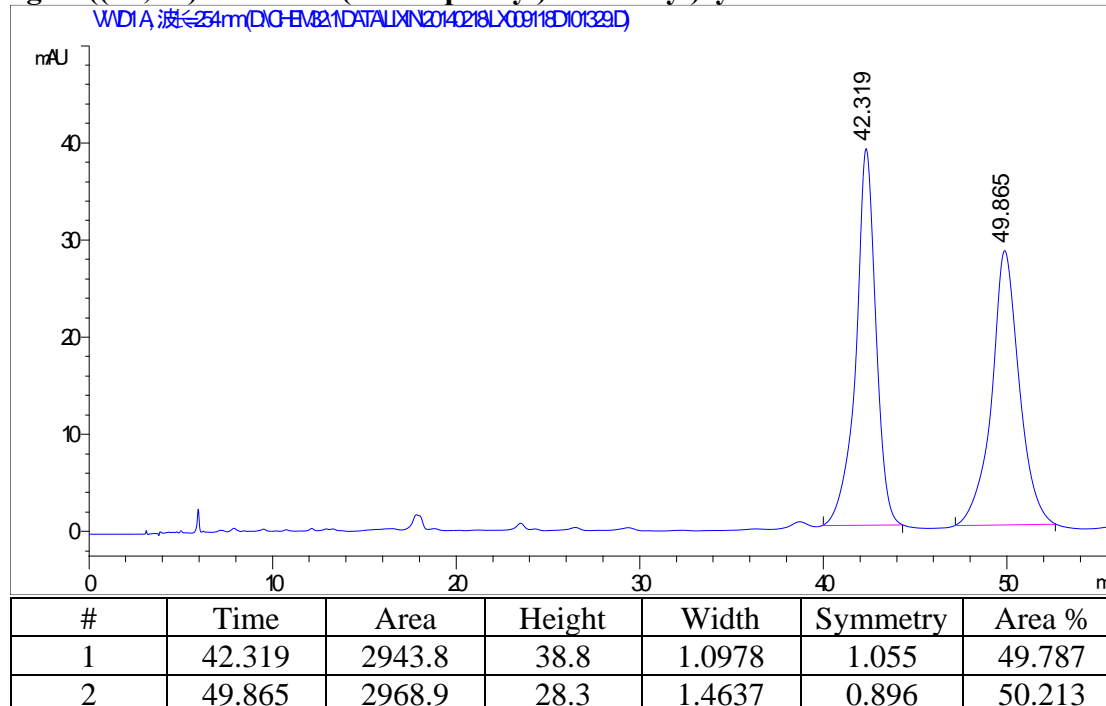

WDIA, 波長=254nm(DIC-EM81DATA\LXN20140218LX009151F001330.D)

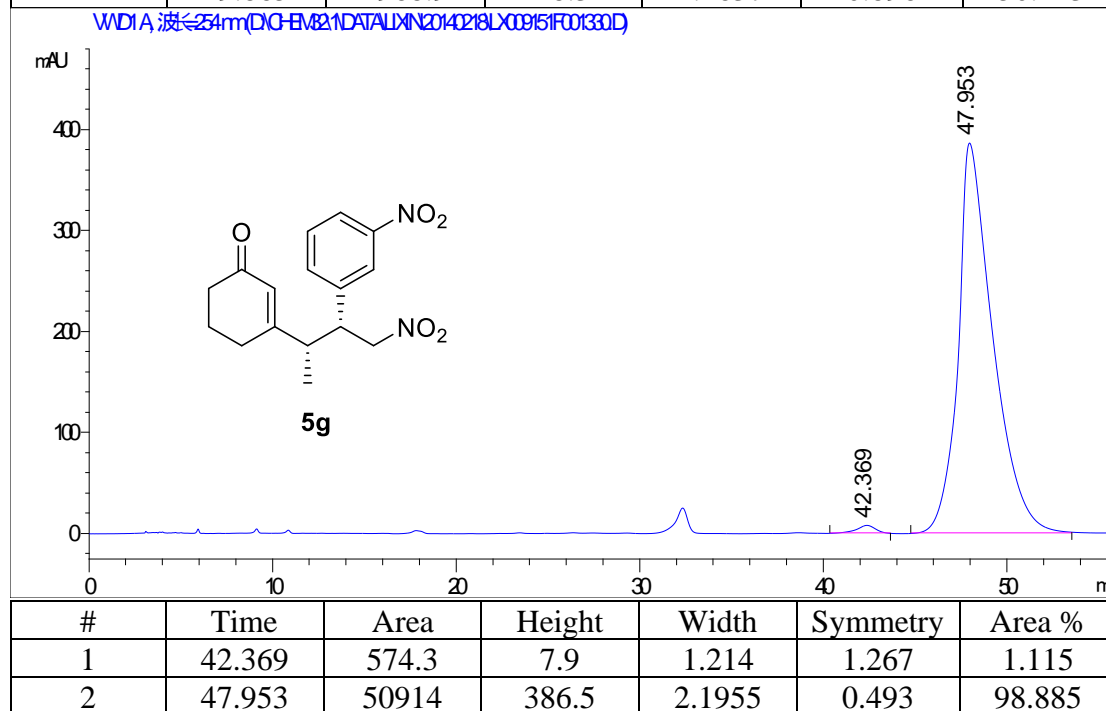



**5h: 3-((2S,3R)-3-(naphthalen-2-yl)-4-nitrobutan-2-yl)cyclohex-2-en-1-one**

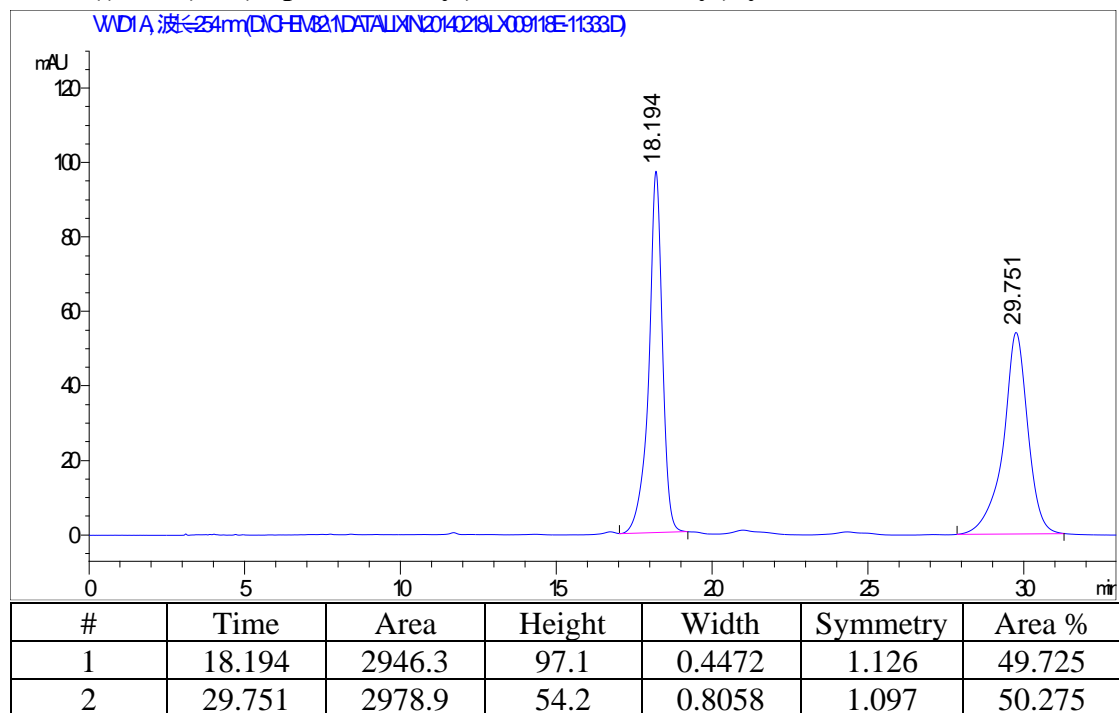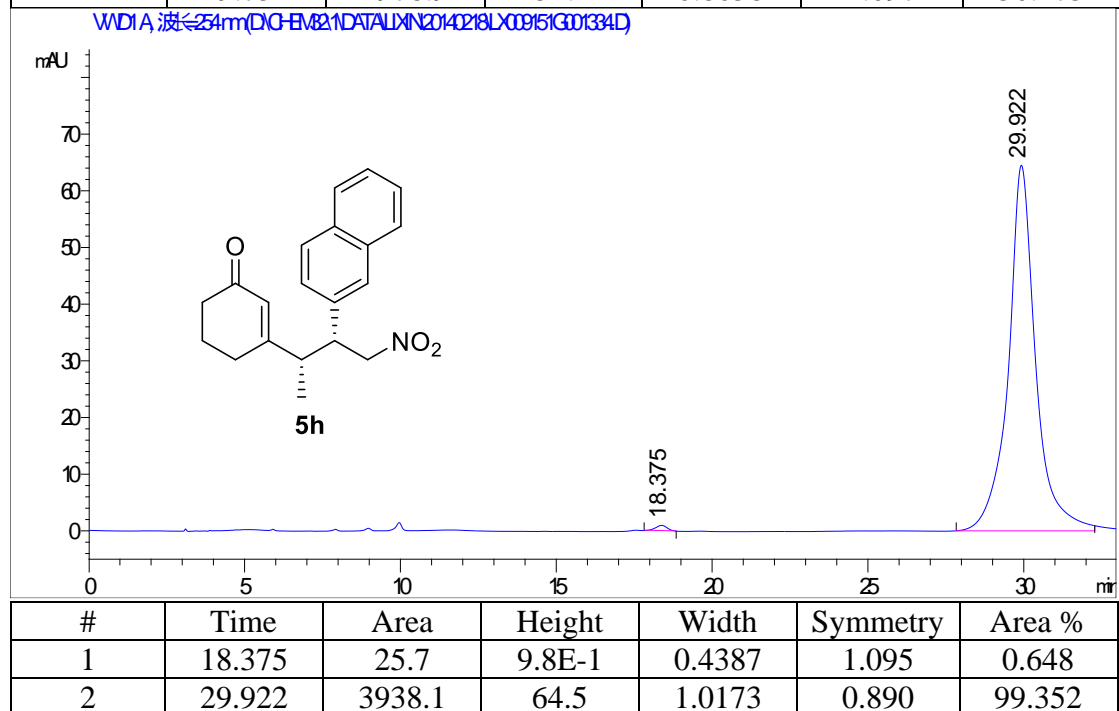

**5i: 3-((2*S*,3*S*)-3-(furan-2-yl)-4-nitrobutan-2-yl)cyclohex-2-en-1-one**

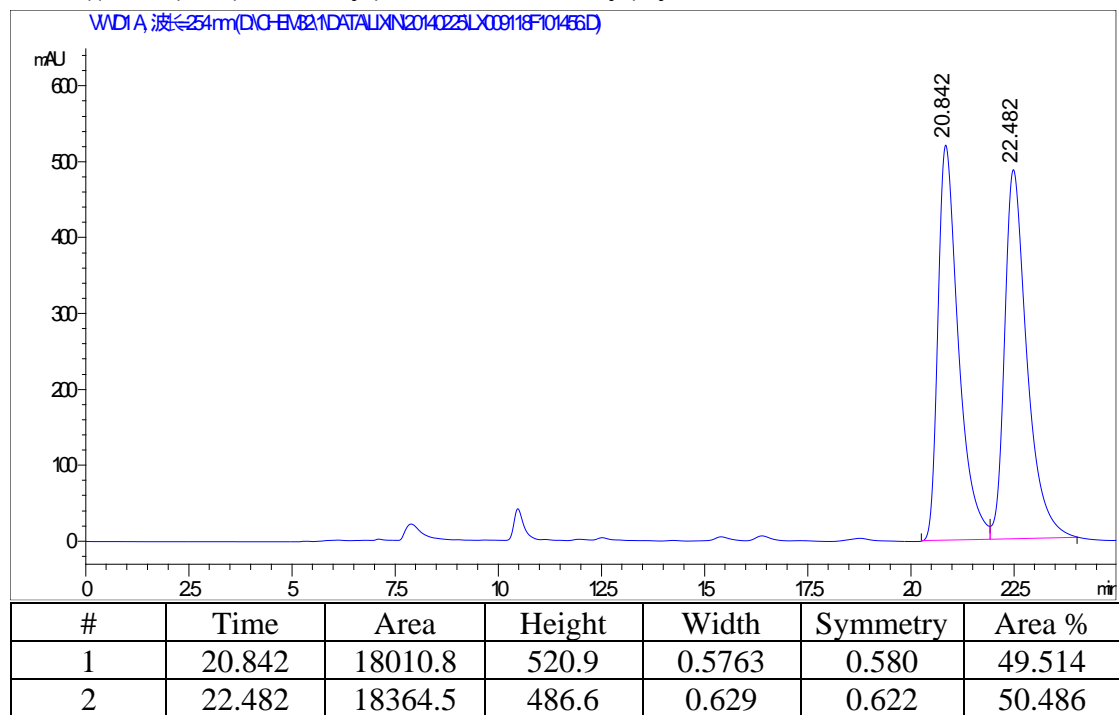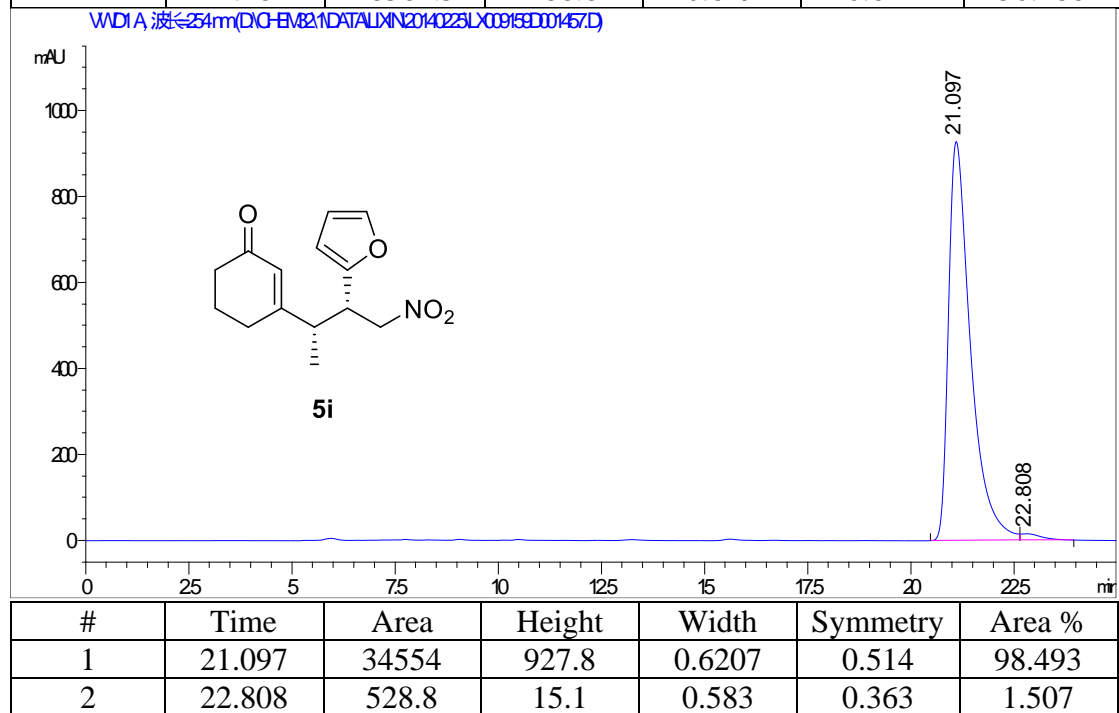

**5j: 3-((2R,3S)-1-nitro-2-phenylpentan-3-yl)cyclohex-2-en-1-one**

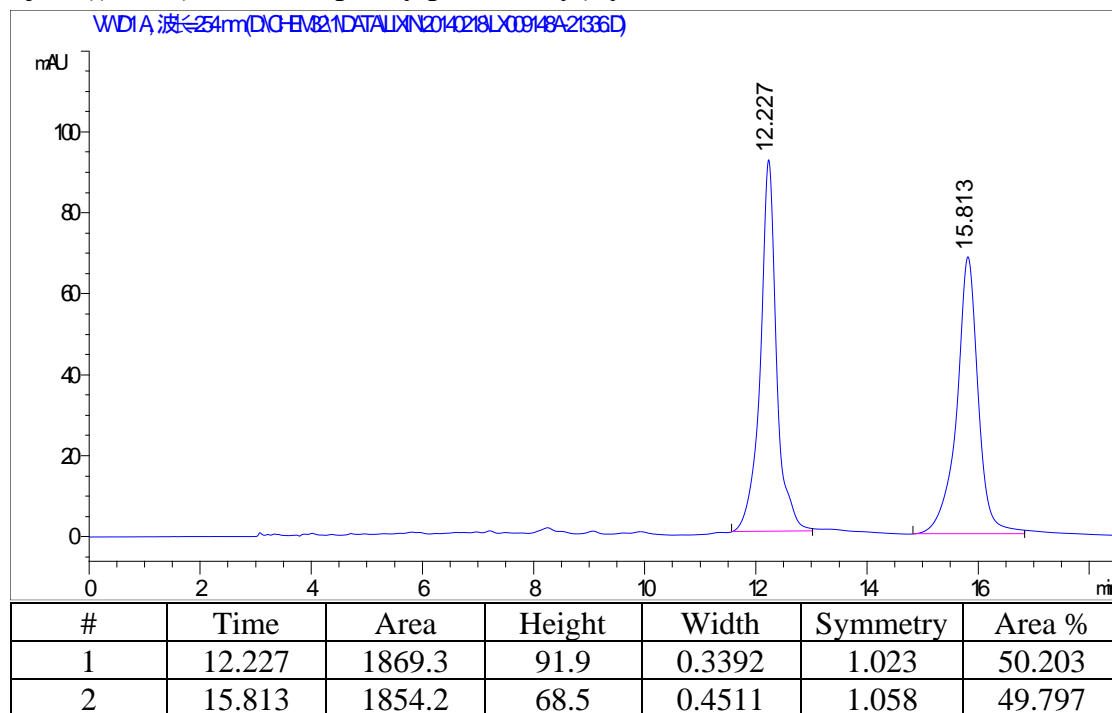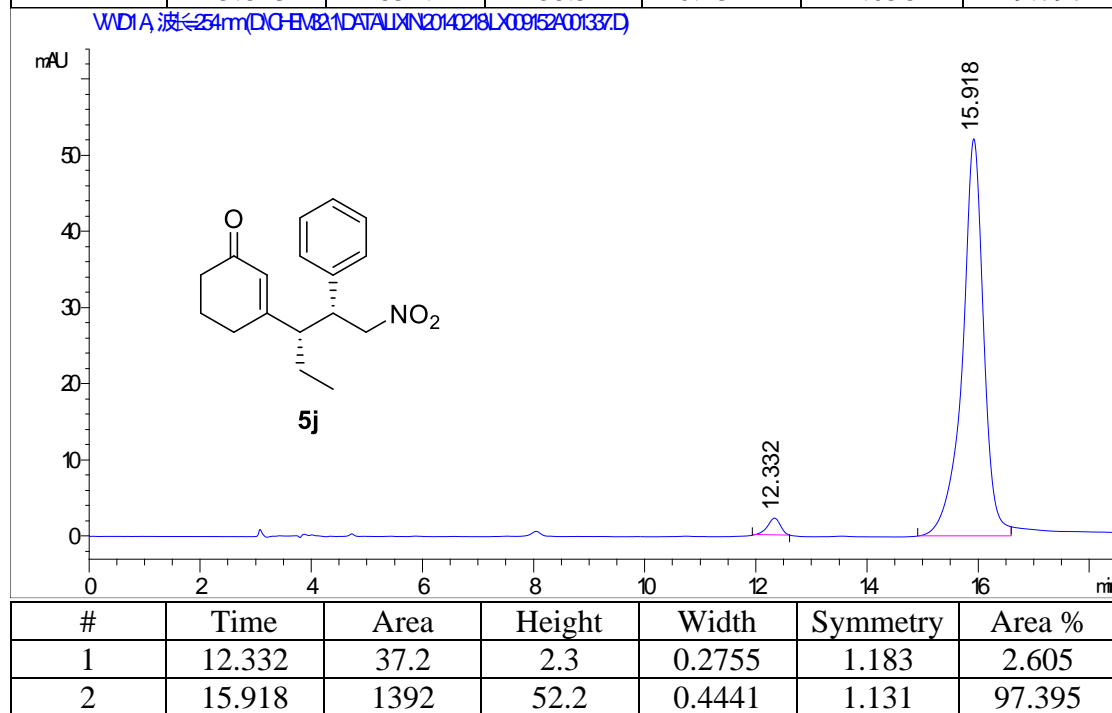

**5k: 3-((2R,3S)-1-nitro-2-phenylhexan-3-yl)cyclohex-2-en-1-one**

WD1A Wavelength=220nm(DI-FLOZCO20210510YL-155CR002872D)

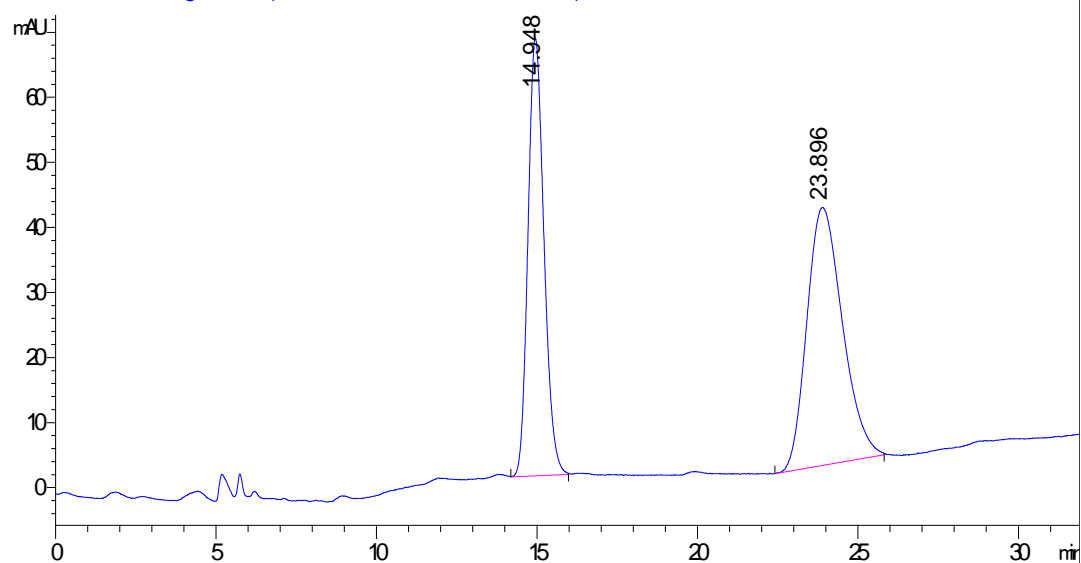

| # | Time   | Area   | Height | Width  | Symmetry | Area % |
|---|--------|--------|--------|--------|----------|--------|
| 1 | 14.948 | 2327.6 | 67.3   | 0.5318 | 0.805    | 43.245 |
| 2 | 23.896 | 3054.7 | 39.7   | 0.9258 | 0.769    | 56.755 |

WD1A Wavelength=220nm(DI-FLOZCO20210510YL-155CR002873D)

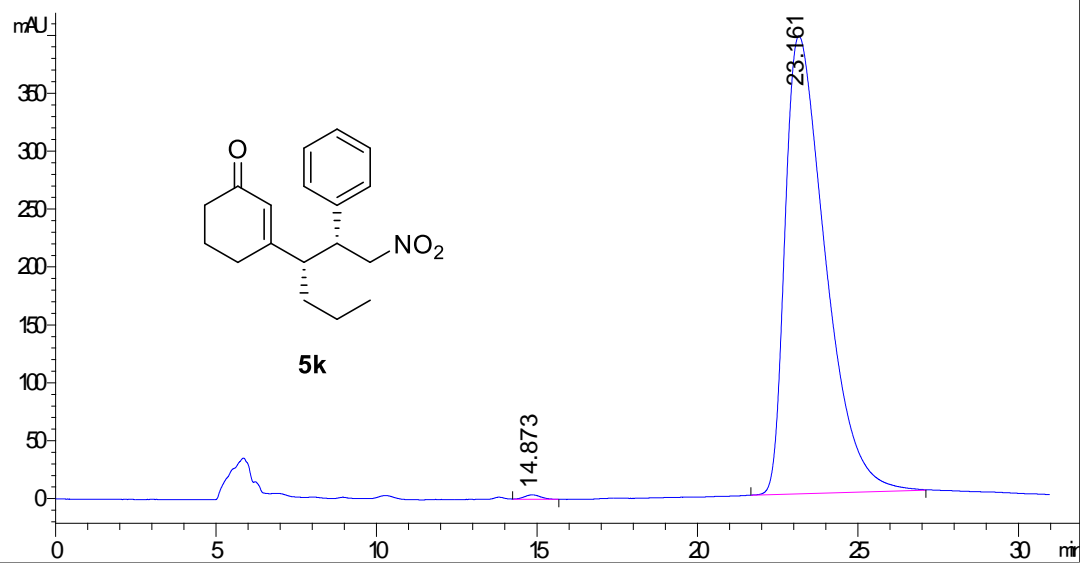

| # | Time   | Area    | Height | Width  | Symmetry | Area % |
|---|--------|---------|--------|--------|----------|--------|
| 1 | 14.873 | 144.4   | 3.9    | 0.4457 | 1.054    | 0.416  |
| 2 | 23.161 | 34533.3 | 395.4  | 1.287  | 0.489    | 99.584 |

**5l: 3-((2R,3S)-1-nitro-2-phenylheptan-3-yl)cyclohex-2-en-1-one**

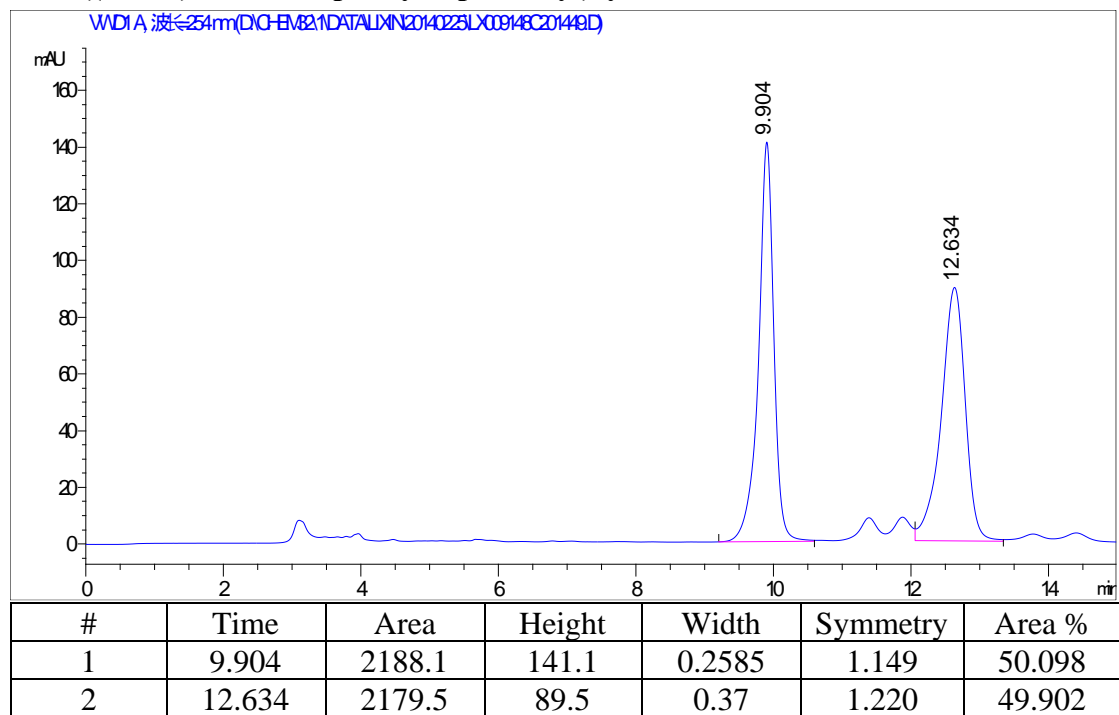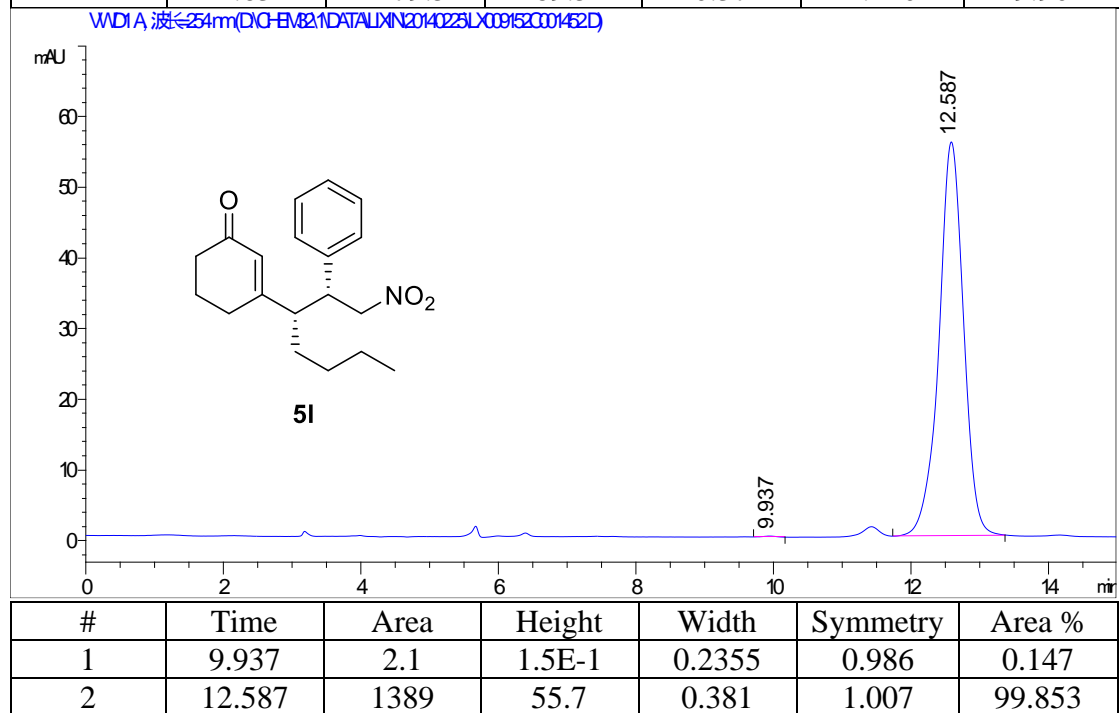

**5m: 3-((2R,3S)-1-nitro-2-phenyloctan-3-yl)cyclohex-2-en-1-one**

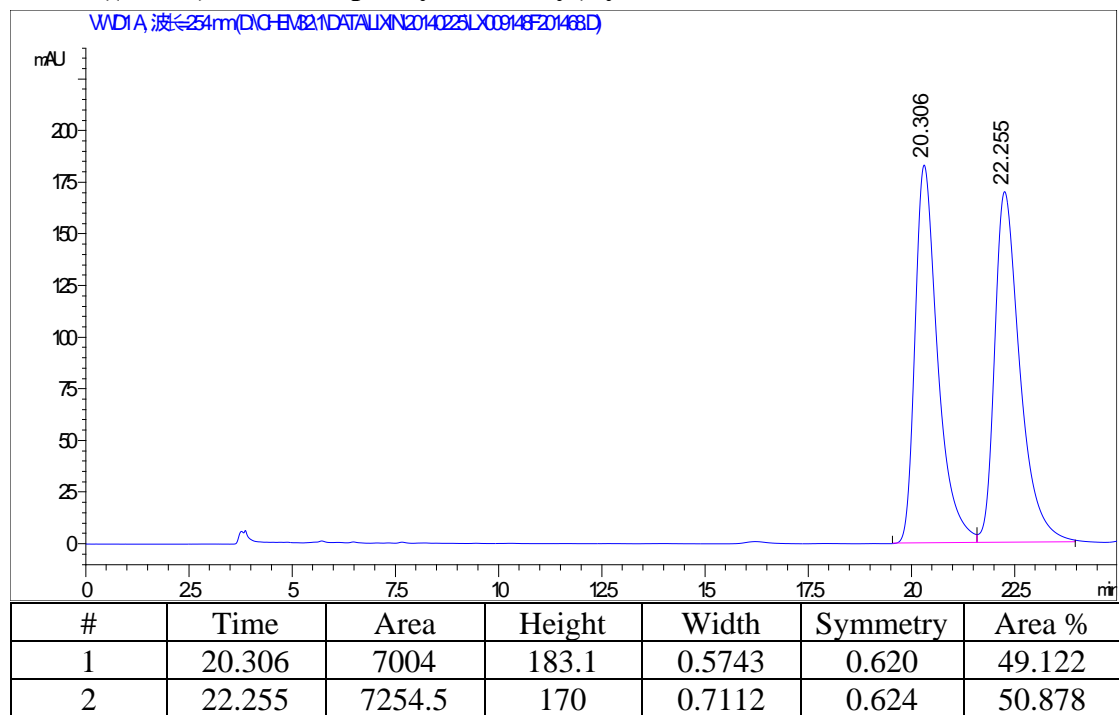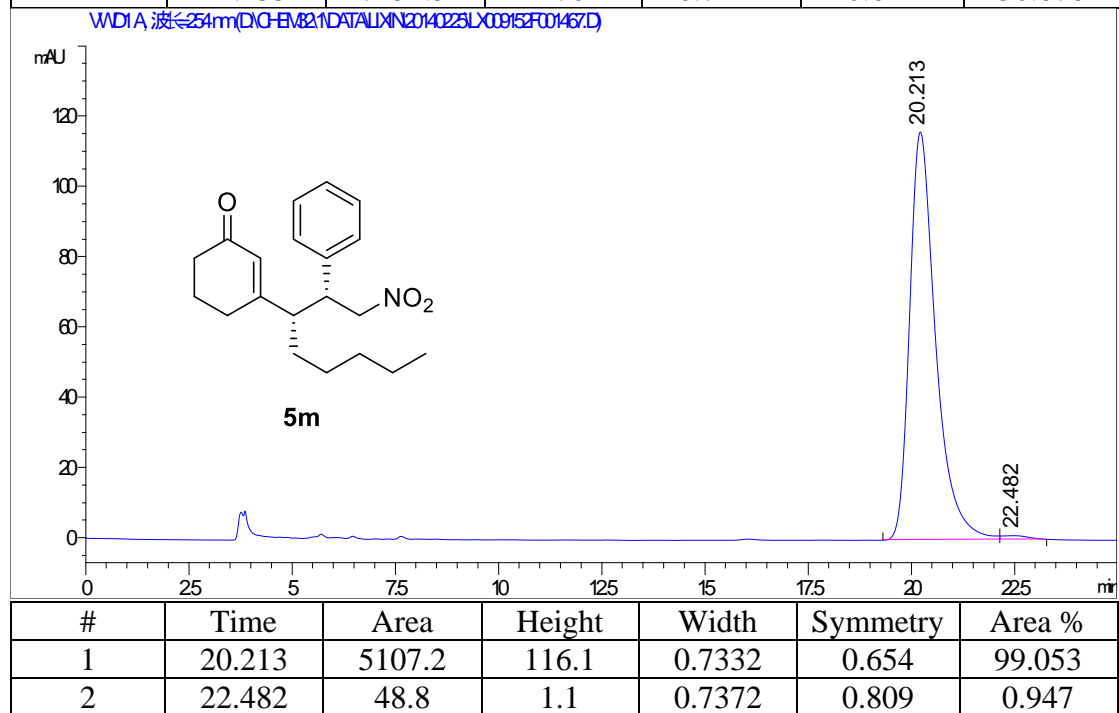

**5n: 3-((1S,2R)-3-nitro-1,2-diphenylpropyl)cyclohex-2-en-1-one**

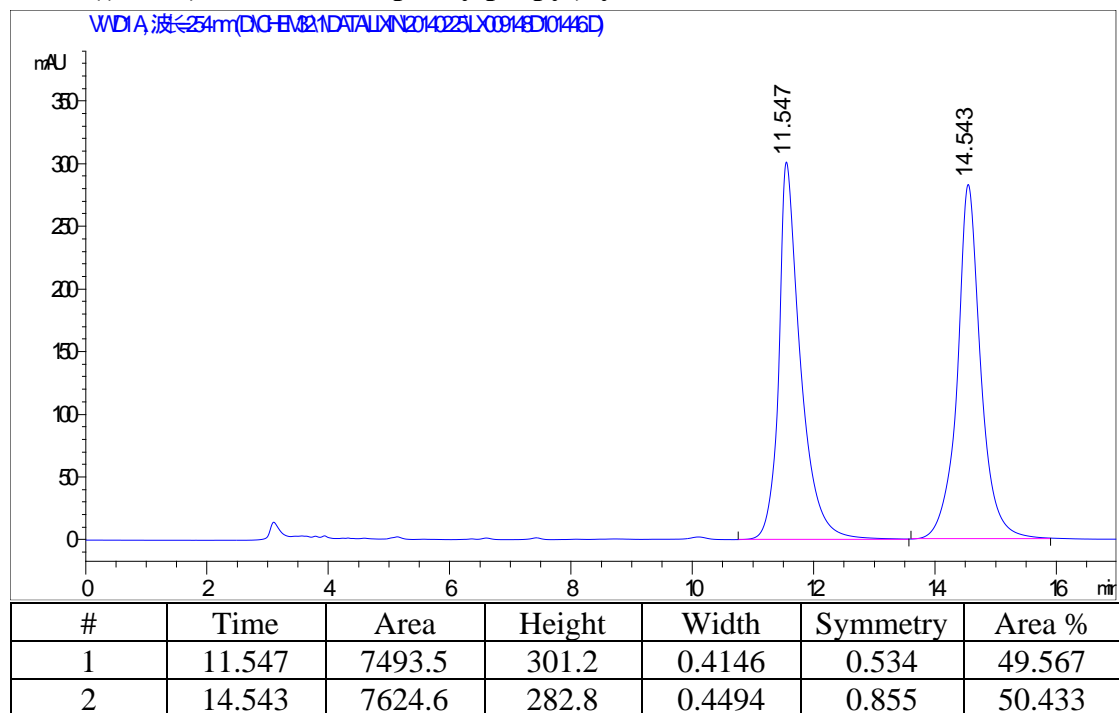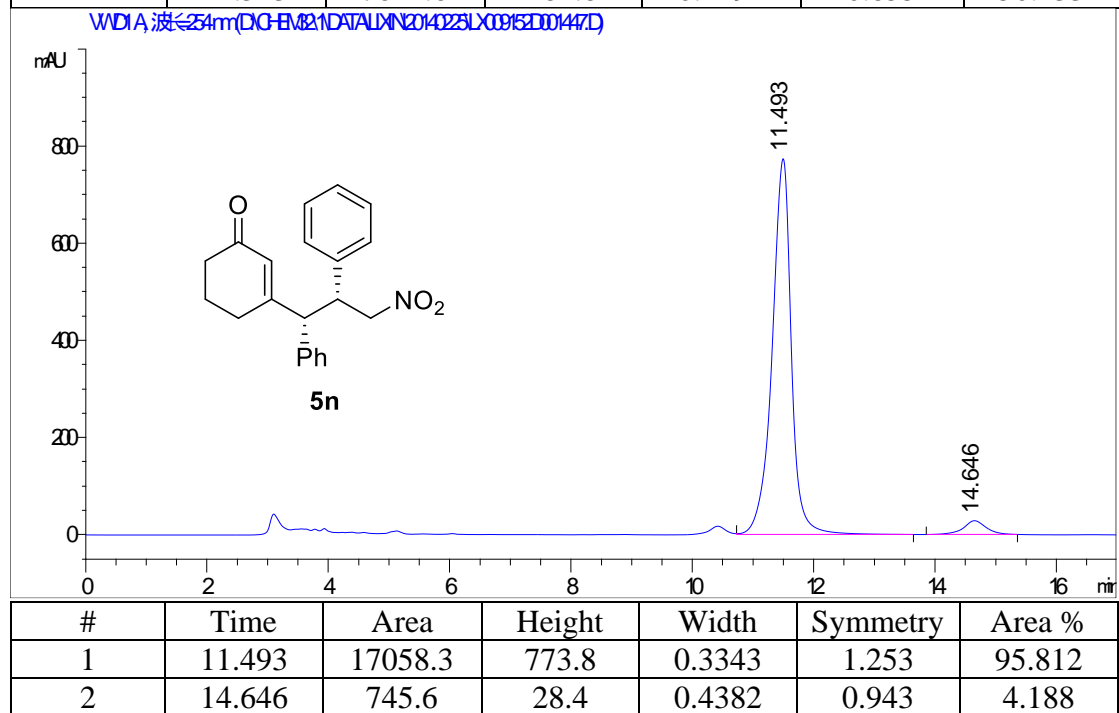

**5o: 3-((2S,3R)-4-nitro-1,3-diphenylbutan-2-yl)cyclohex-2-en-1-one**

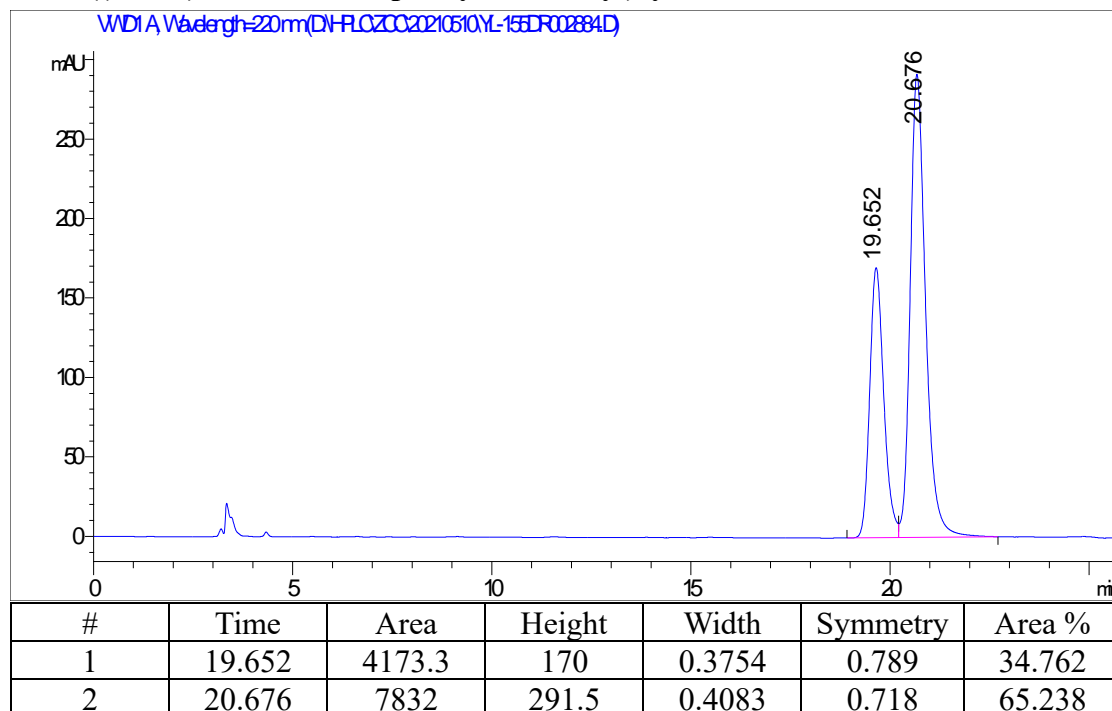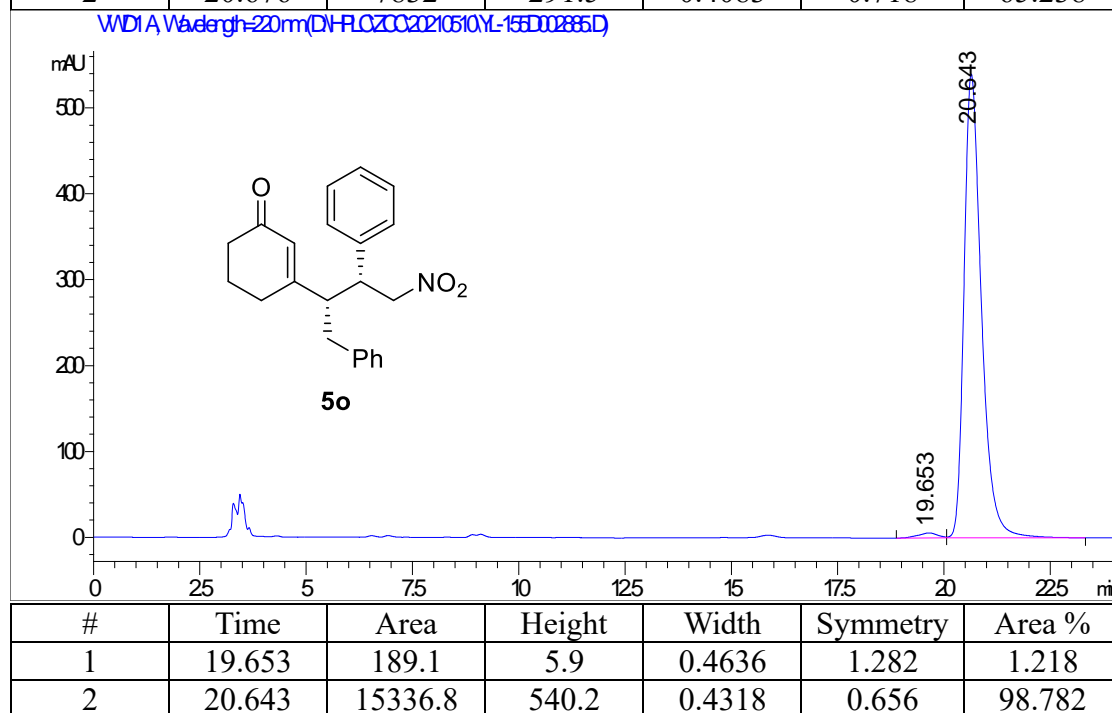



**5p: 3-((2R,3S)-2-(4-bromophenyl)-1-nitrohexan-3-yl)cyclohex-2-en-1-one**

WD1A Wavelength=220nm(DHFLCZC020210510YL-155E002881.D)

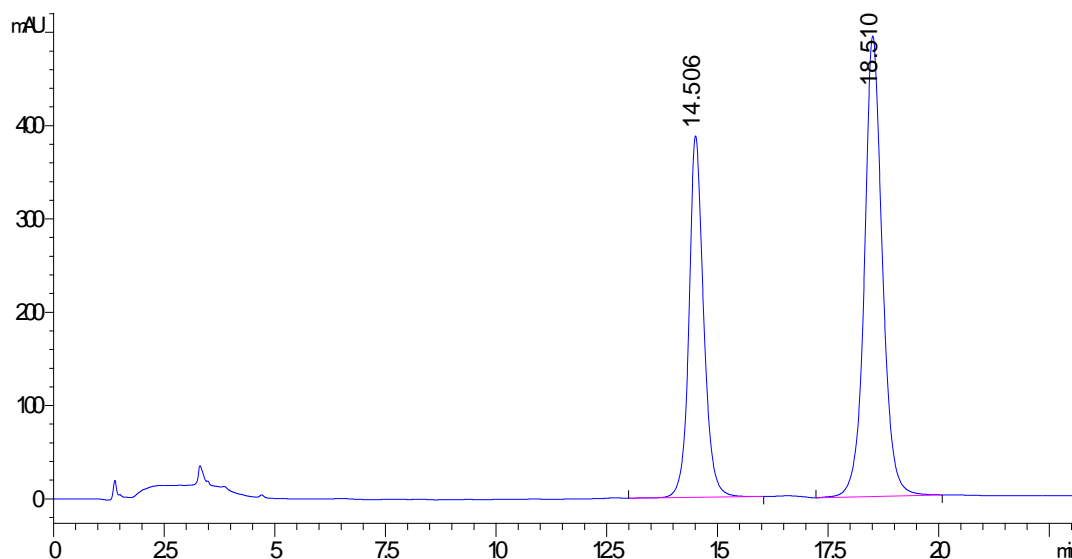

| # | Time   | Area    | Height | Width  | Symmetry | Area % |
|---|--------|---------|--------|--------|----------|--------|
| 1 | 14.506 | 8934.1  | 387.7  | 0.3447 | 0.783    | 39.039 |
| 2 | 18.51  | 13951.3 | 493.6  | 0.4245 | 0.844    | 60.961 |

WD1A Wavelength=220nm(DHFLCZC020210510YL-155E002882.D)

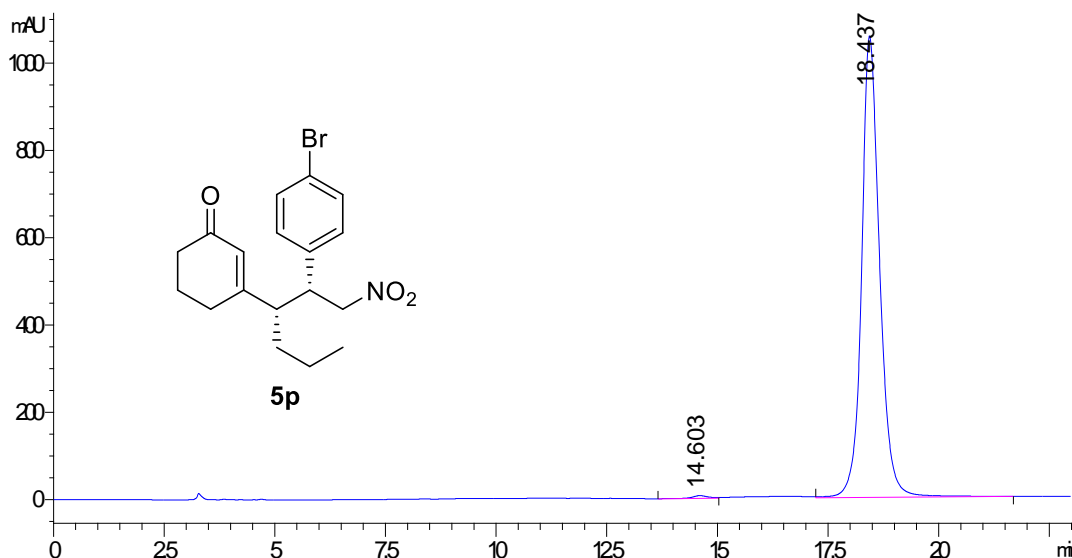

| # | Time   | Area    | Height | Width  | Symmetry | Area % |
|---|--------|---------|--------|--------|----------|--------|
| 1 | 14.603 | 172.9   | 6.6    | 0.3769 | 0.811    | 0.575  |
| 2 | 18.437 | 29876.3 | 1057.1 | 0.4245 | 0.754    | 99.425 |

**6a: (R)-3-ethyl-4-((R)-2-nitro-1-phenylethyl)cyclohex-2-en-1-one**

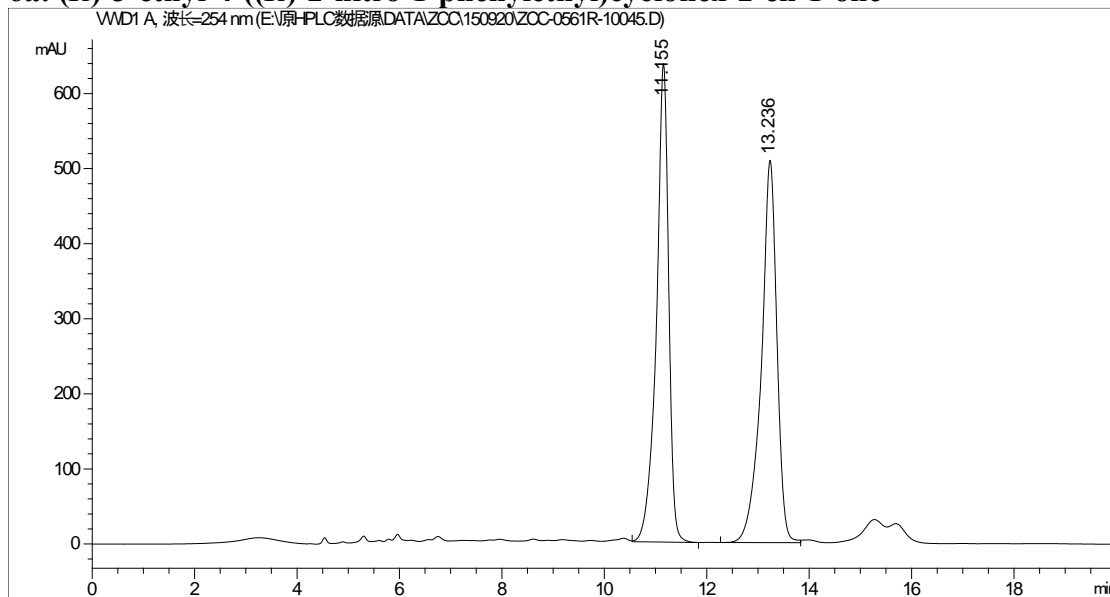

| # | Time   | Area    | Height | Width  | Symmetry | Area % |
|---|--------|---------|--------|--------|----------|--------|
| 1 | 11.155 | 10546.4 | 637.3  | 0.2426 | 1.329    | 49.540 |
| 2 | 13.236 | 10742.2 | 509.3  | 0.3087 | 1.267    | 50.460 |

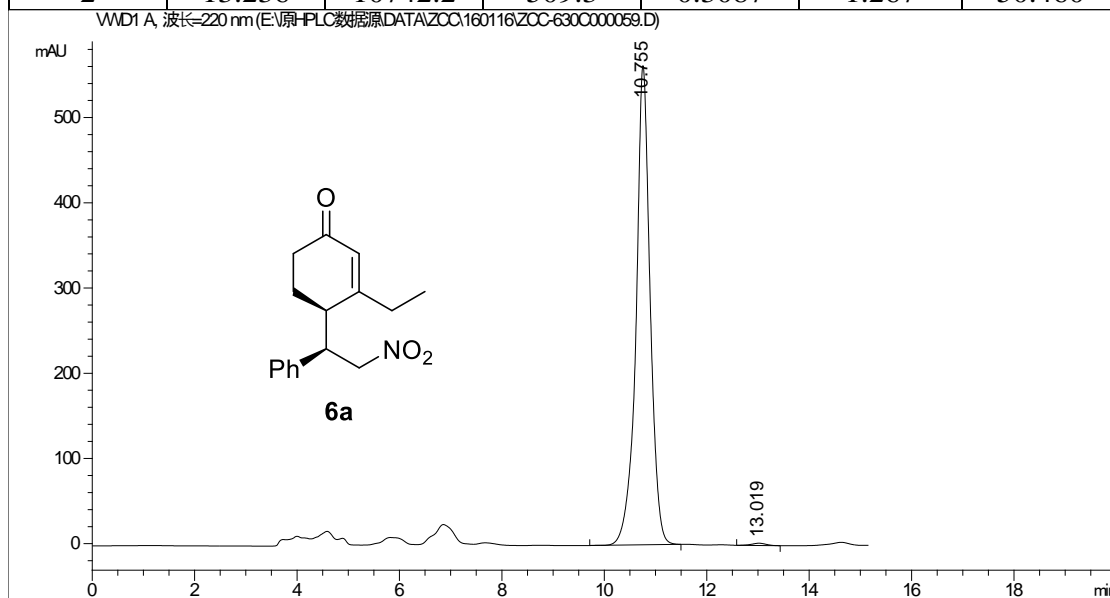

| # | Time   | Area    | Height | Width  | Symmetry | Area % |
|---|--------|---------|--------|--------|----------|--------|
| 1 | 10.755 | 10766.5 | 562.2  | 0.2802 | 0.967    | 99.519 |
| 2 | 13.019 | 52      | 2.7    | 0.2877 | 0.997    | 0.481  |

**6b: (R)-3-ethyl-4-((R)-2-nitro-1-(p-tolyl)ethyl)cyclohex-2-en-1-one**

WD1A Wavelength=220nm(DI-FLOZCO20210510YL-643A002895D)

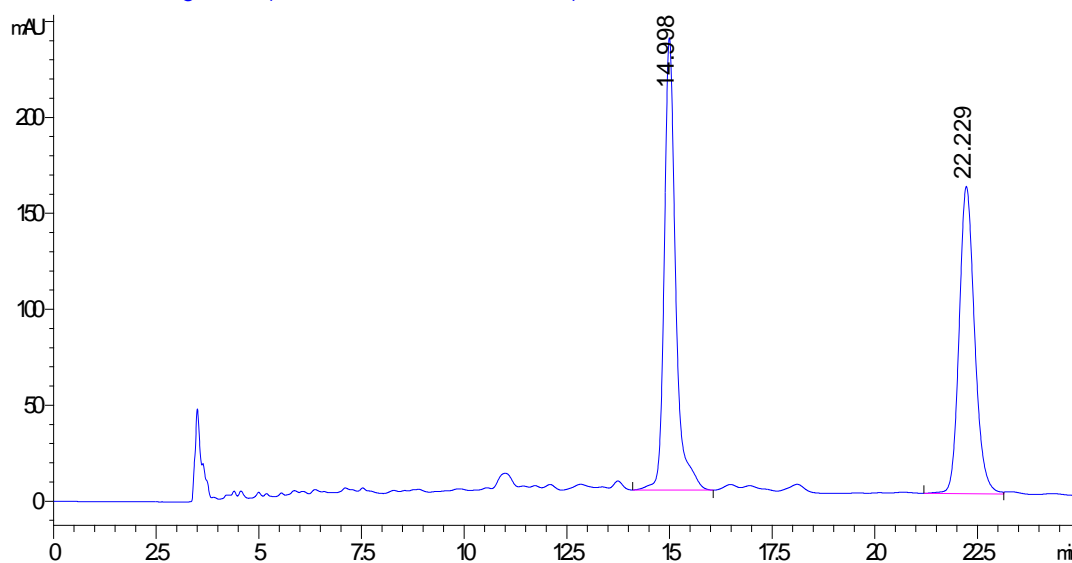

| # | Time   | Area   | Height | Width  | Symmetry | Area % |
|---|--------|--------|--------|--------|----------|--------|
| 1 | 14.998 | 4537.9 | 235.6  | 0.2888 | 0.763    | 51.928 |
| 2 | 22.229 | 4200.9 | 160.2  | 0.4021 | 0.822    | 48.072 |

WD1A Wavelength=220nm(DI-FLOZCO20210510YL-643A002894D)

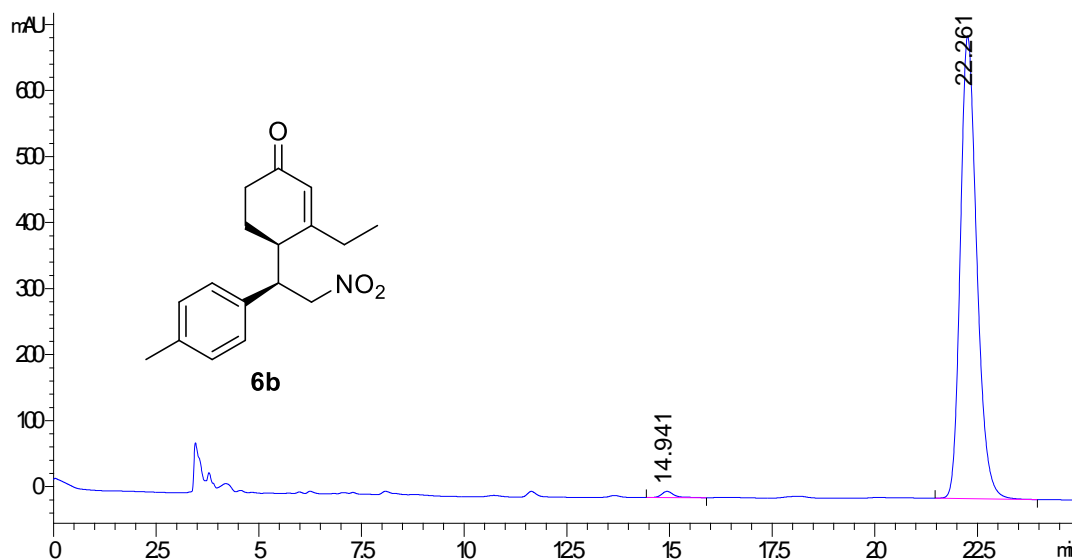

| # | Time   | Area    | Height | Width  | Symmetry | Area % |
|---|--------|---------|--------|--------|----------|--------|
| 1 | 14.941 | 191.6   | 9.3    | 0.3048 | 0.721    | 0.972  |
| 2 | 22.261 | 19524.6 | 700.7  | 0.4286 | 0.749    | 99.028 |

**6c: (R)-3-ethyl-4-((R)-1-(4-methoxyphenyl)-2-nitroethyl)cyclohex-2-en-1-one**

WD1A Wavelength=220nm(DI-FLOZCO20210518YL-643B002914D)

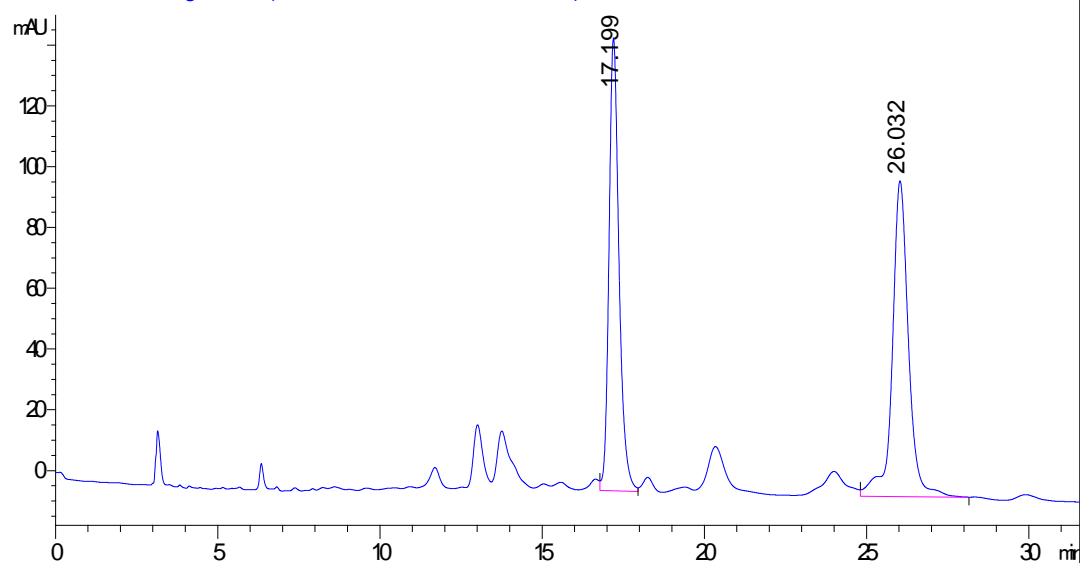

| # | Time   | Area   | Height | Width  | Symmetry | Area % |
|---|--------|--------|--------|--------|----------|--------|
| 1 | 17.199 | 3204.2 | 149.1  | 0.3252 | 0.759    | 47.013 |
| 2 | 26.032 | 3611.5 | 103.9  | 0.5207 | 0.906    | 52.987 |

WD1A Wavelength=220nm(DI-FLOZCO20210518YL-643B002915D)

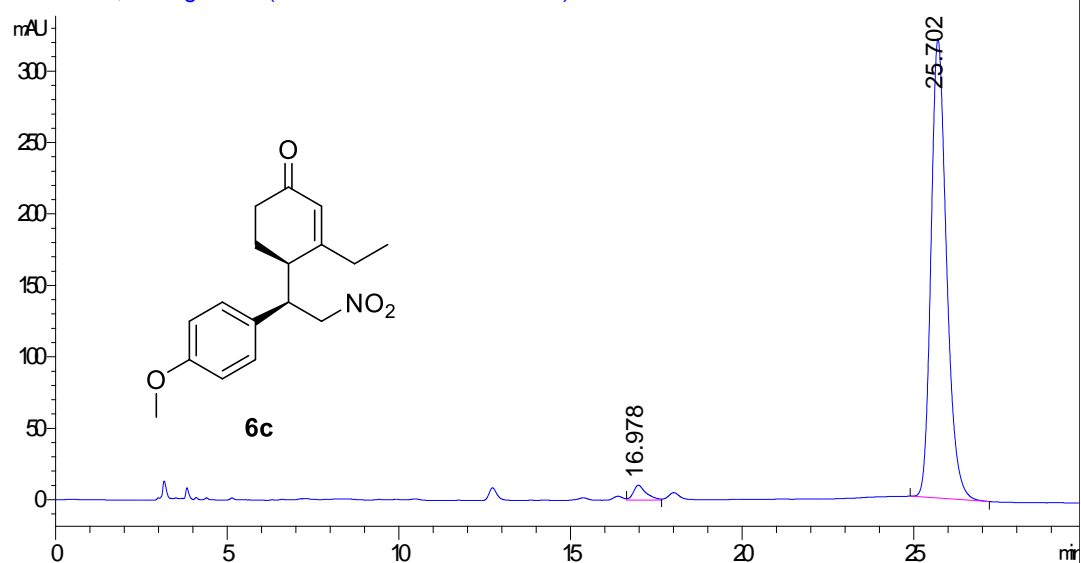

| # | Time   | Area    | Height | Width  | Symmetry | Area % |
|---|--------|---------|--------|--------|----------|--------|
| 1 | 16.978 | 268     | 10.4   | 0.3737 | 0.613    | 2.583  |
| 2 | 25.702 | 10108.4 | 321.4  | 0.4835 | 0.752    | 97.417 |

**6d: (R)-3-ethyl-4-((R)-1-(4-fluorophenyl)-2-nitroethyl)cyclohex-2-en-1-one**

WDIA; 波長20nm(DIG-EM&1DATAZCC160817ZCG64CR0005D)

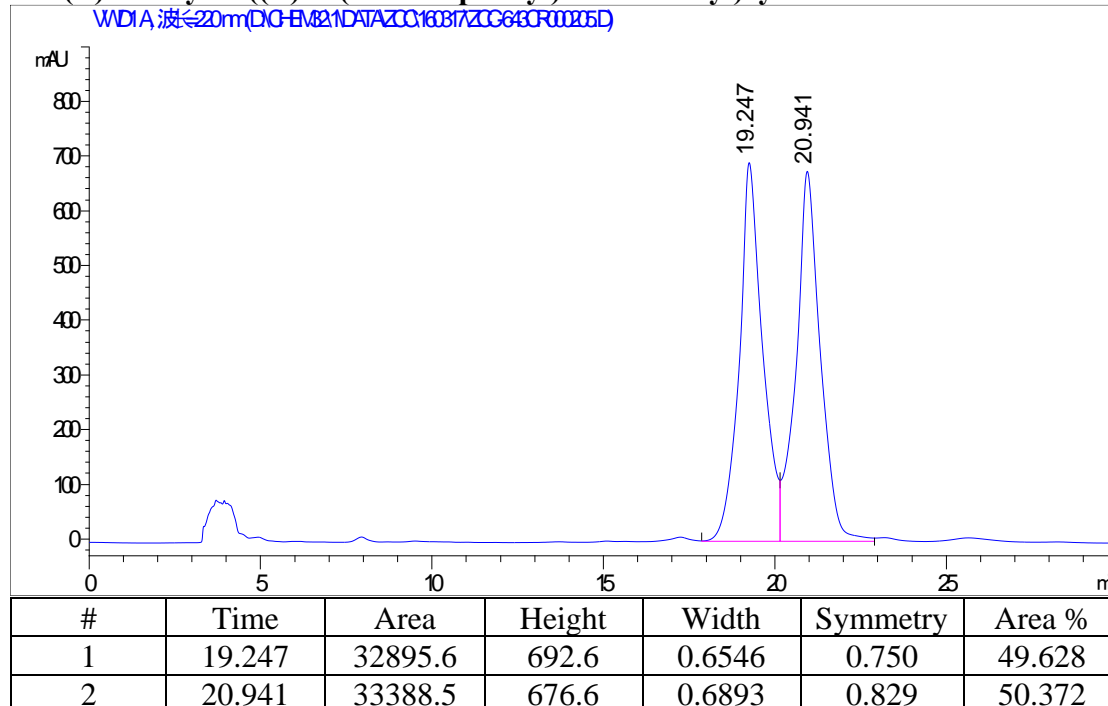

WDIA; 波長20nm(DIG-EM&1DATAZCC16025ZCG64CR0005D)

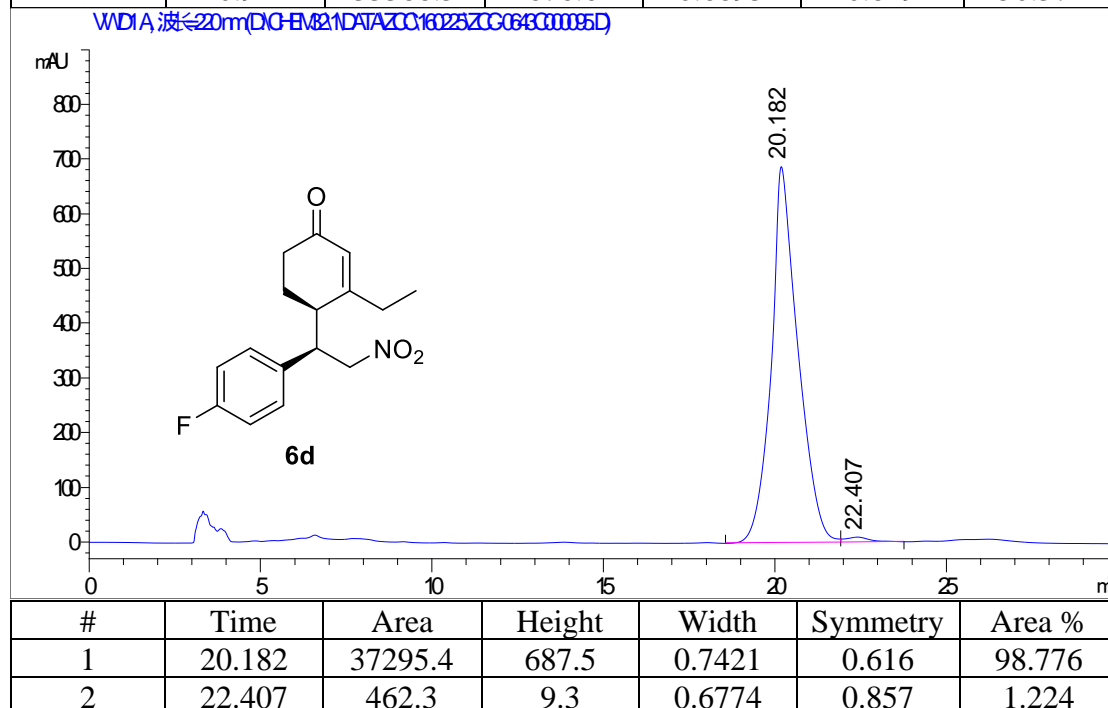

**6e: (R)-4-((R)-1-(4-chlorophenyl)-2-nitroethyl)-3-ethylcyclohex-2-en-1-one**

WD1A Wavelength=220nm(DI-FLOZCO20210518YL-643DR02916D)

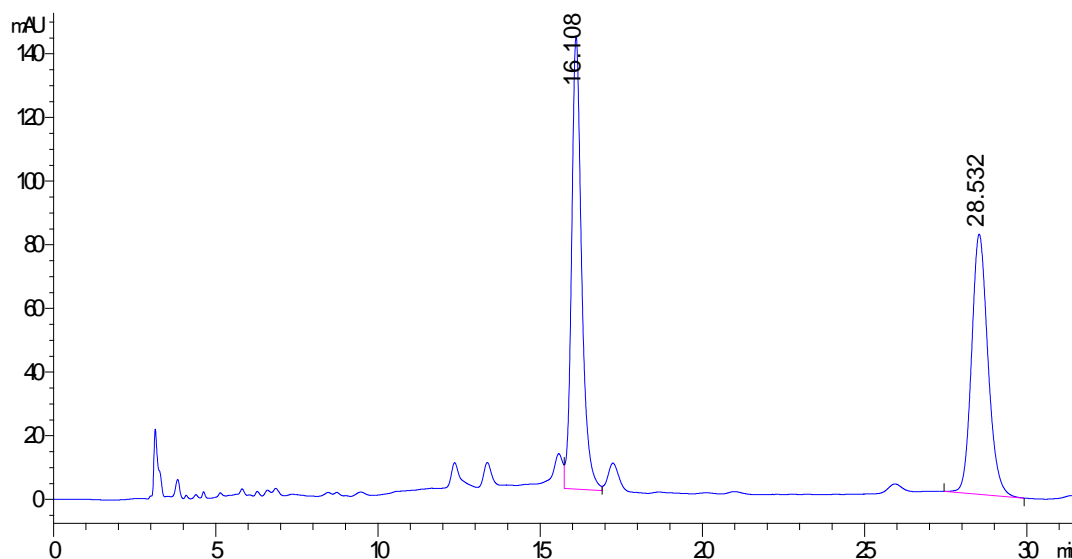

| # | Time   | Area   | Height | Width  | Symmetry | Area % |
|---|--------|--------|--------|--------|----------|--------|
| 1 | 16.108 | 3073.8 | 142.3  | 0.3248 | 0.754    | 51.755 |
| 2 | 28.532 | 2865.4 | 81.8   | 0.5371 | 0.825    | 48.245 |

WD1A Wavelength=220nm(DI-FLOZCO20210518YL-643DR02917D)

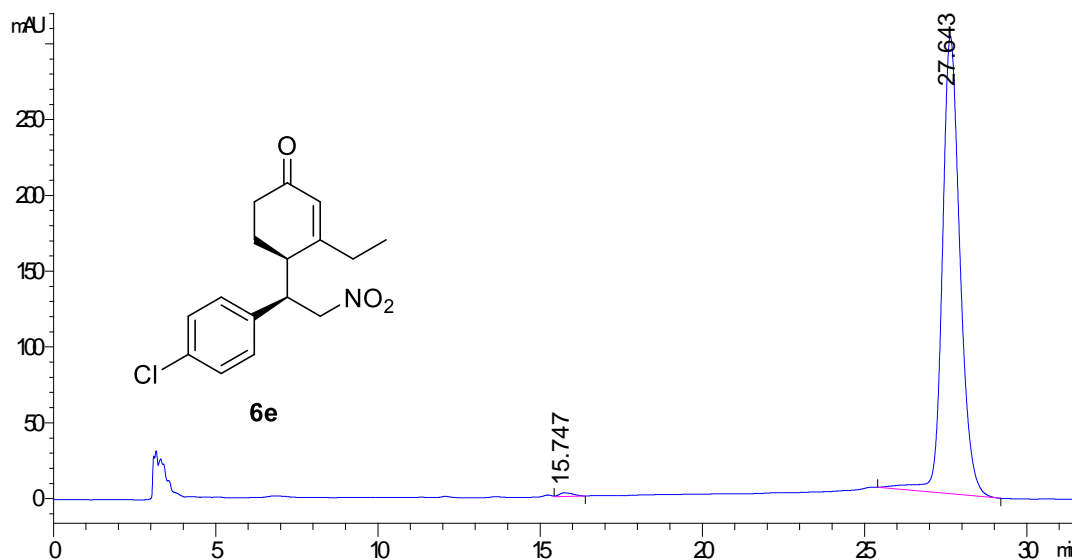

| # | Time   | Area    | Height | Width  | Symmetry | Area % |
|---|--------|---------|--------|--------|----------|--------|
| 1 | 15.747 | 73.2    | 2.4    | 0.4082 | 0.594    | 0.635  |
| 2 | 27.643 | 11459.2 | 302    | 0.5768 | 0.809    | 99.365 |

**6f: (R)-4-((R)-1-(4-bromophenyl)-2-nitroethyl)-3-ethylcyclohex-2-en-1-one**

WD1A Wavelength=220nm(DI-FLOZCO20210510YL-647A002901.D)

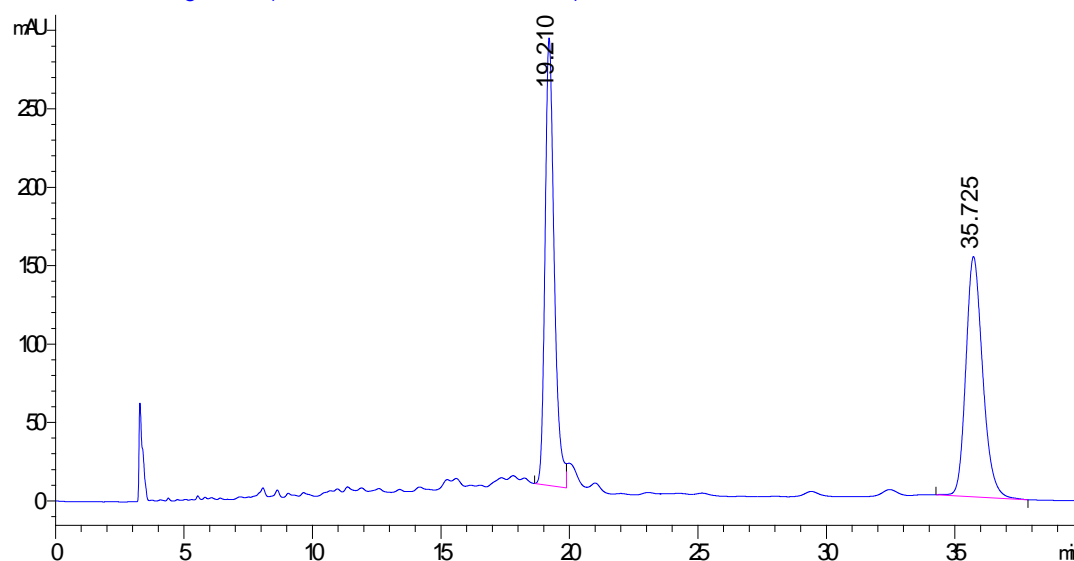

| # | Time   | Area   | Height | Width  | Symmetry | Area % |
|---|--------|--------|--------|--------|----------|--------|
| 1 | 19.21  | 7070.1 | 285.3  | 0.3751 | 0.73     | 50.360 |
| 2 | 35.725 | 6969   | 153.2  | 0.6985 | 0.782    | 49.640 |

WD1A Wavelength=220nm(DI-FLOZCO20210510YL-647A002902.D)

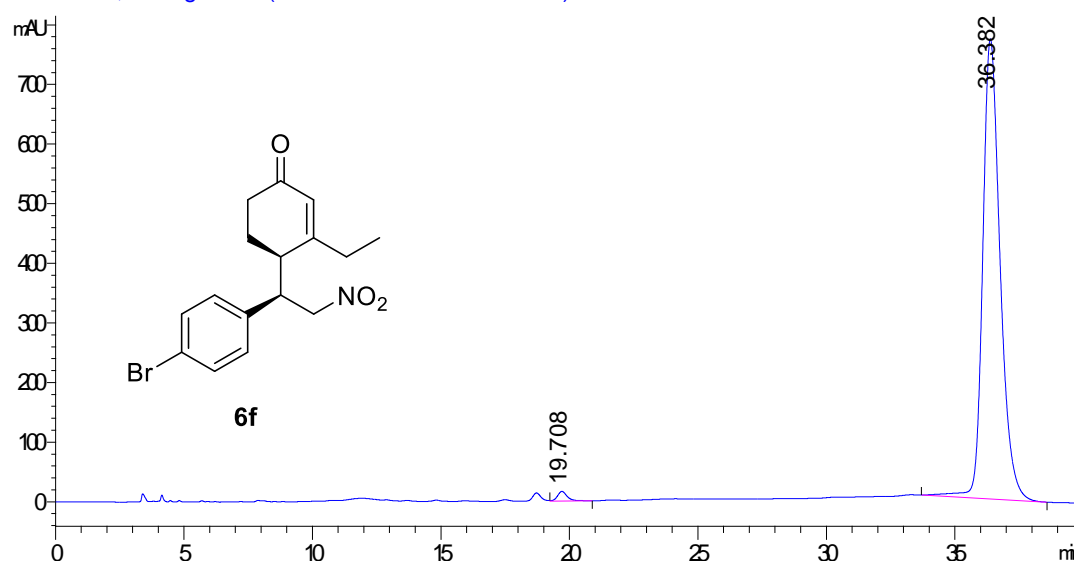

| # | Time   | Area    | Height | Width  | Symmetry | Area % |
|---|--------|---------|--------|--------|----------|--------|
| 1 | 19.708 | 420     | 16.1   | 0.3936 | 0.788    | 1.144  |
| 2 | 36.382 | 36298.6 | 771.6  | 0.7179 | 0.75     | 98.856 |

**6g: (R)-3-ethyl-4-((R)-2-nitro-1-(3-nitrophenyl)ethyl)cyclohex-2-en-1-one**

WDIA, 波長20nm(D:\G-EM\21\DATA\ZCC160228\ZCG0647\B00102D)

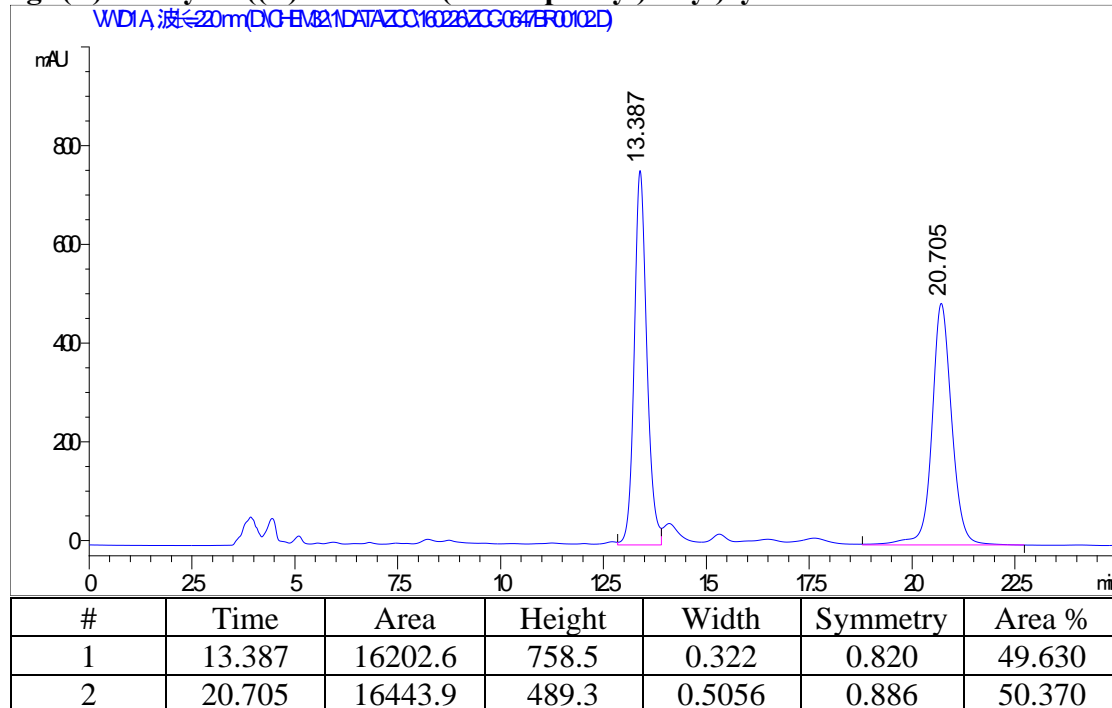

WDIA, 波長20nm(D:\G-EM\21\DATA\ZCC160228\ZCG0647\B00103D)

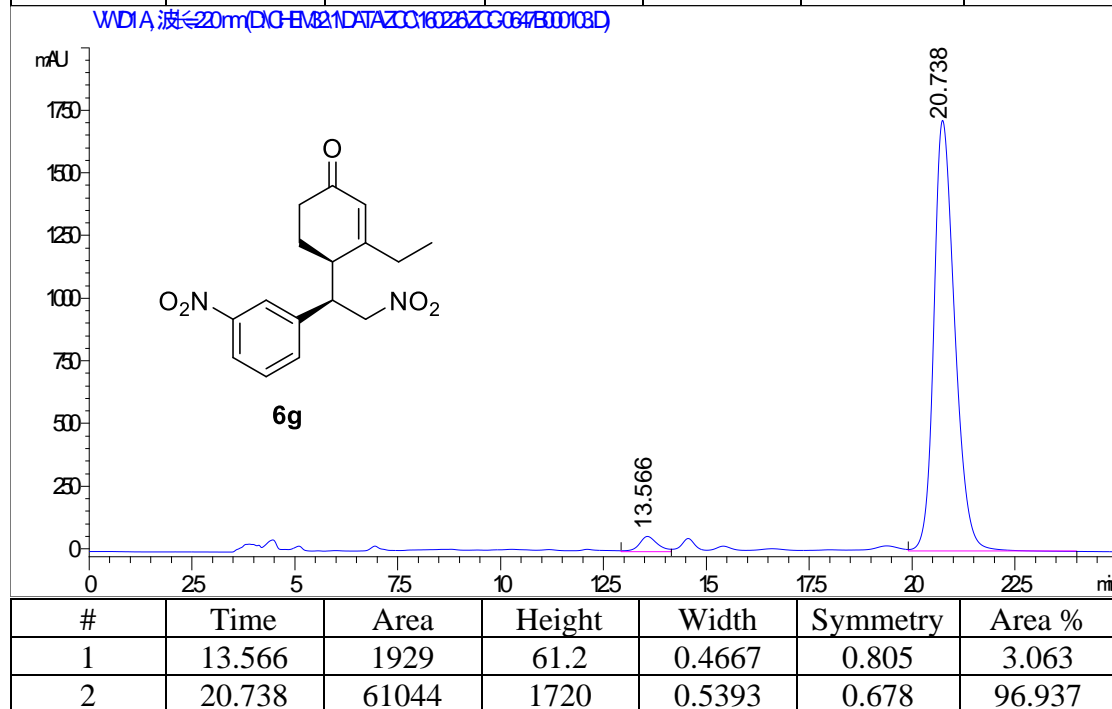



**6h: (R)-3-ethyl-4-((R)-1-(naphthalen-2-yl)-2-nitroethyl)cyclohex-2-en-1-one**

WDIA, 波長220nm(DIG-EM81DATAZCC16080AZCG647C000131.D)

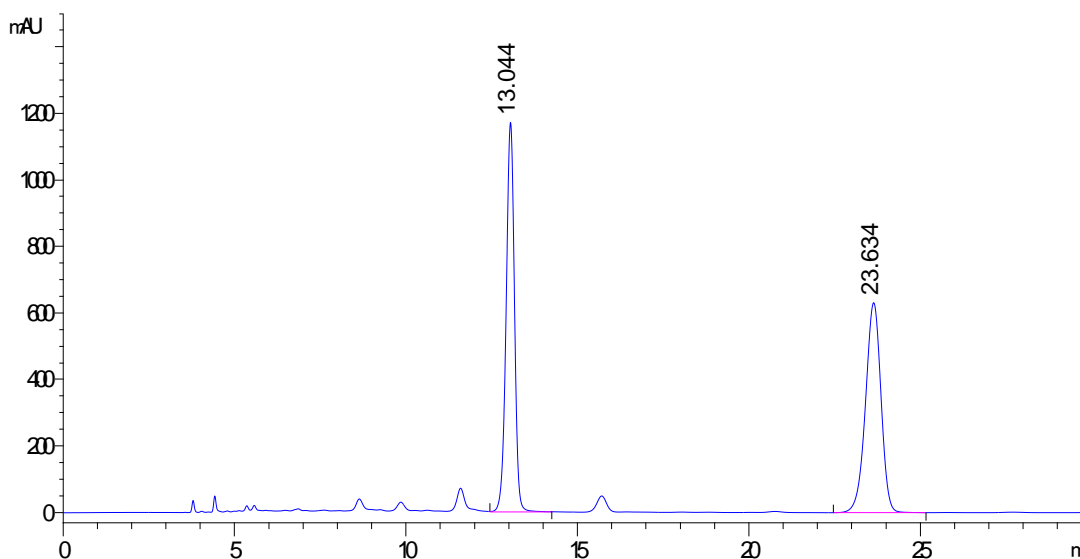

| # | Time   | Area    | Height | Width  | Symmetry | Area % |
|---|--------|---------|--------|--------|----------|--------|
| 1 | 13.044 | 19741.4 | 1171.3 | 0.2607 | 1.072    | 49.932 |
| 2 | 23.634 | 19794.8 | 631.3  | 0.4881 | 1.092    | 50.068 |

WDIA, 波長220nm(DIG-EM81DATAZCC16080AZCG647C000135.D)

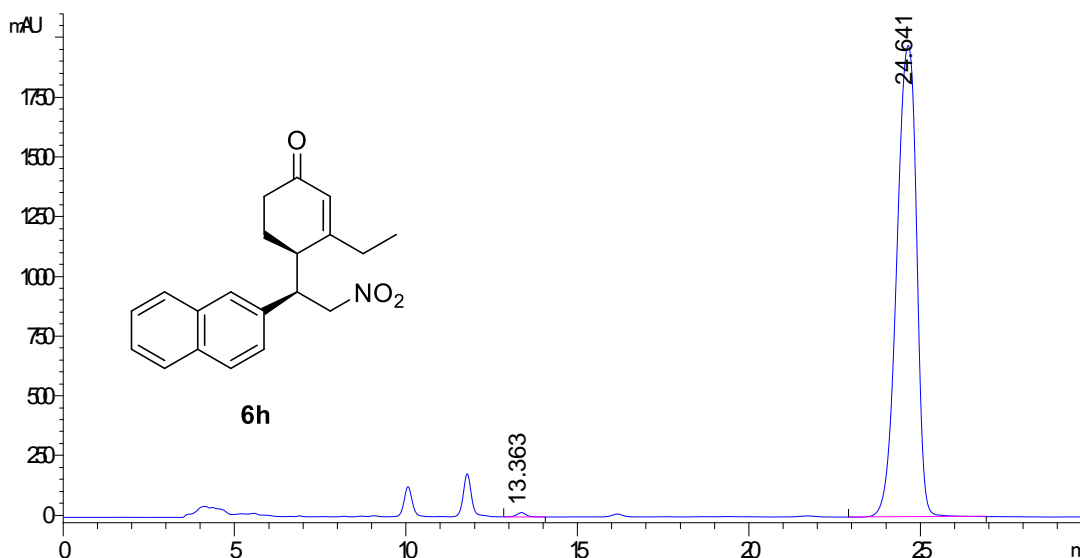

| # | Time   | Area    | Height | Width  | Symmetry | Area % |
|---|--------|---------|--------|--------|----------|--------|
| 1 | 13.363 | 381.6   | 18.6   | 0.306  | 1.020    | 0.481  |
| 2 | 24.641 | 79009.4 | 1973.1 | 0.6404 | 1.301    | 99.519 |

**6i: (R)-3-ethyl-4-((S)-1-(furan-2-yl)-2-nitroethyl)cyclohex-2-en-1-one**

WDIA, 波長220nm(DIG-EM81DATAZCC16087ZCG647D000137D)

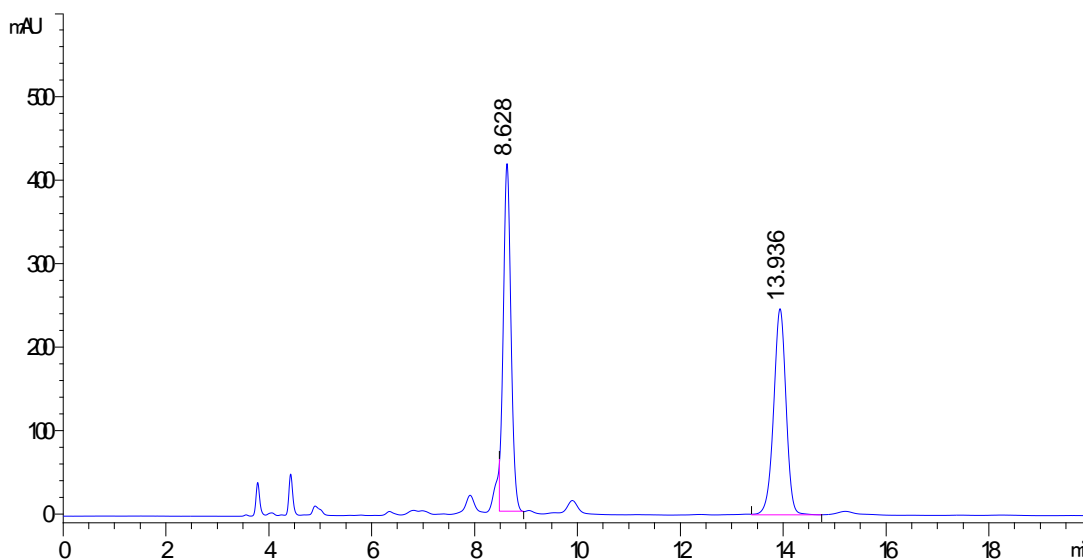

| # | Time   | Area   | Height | Width  | Symmetry | Area % |
|---|--------|--------|--------|--------|----------|--------|
| 1 | 8.628  | 4311   | 417.1  | 0.1722 | 0.901    | 50.874 |
| 2 | 13.936 | 4162.9 | 247.5  | 0.2588 | 1.033    | 49.126 |

WDIA, 波長220nm(DIG-EM81DATAZCC16087ZCG647D000138D)

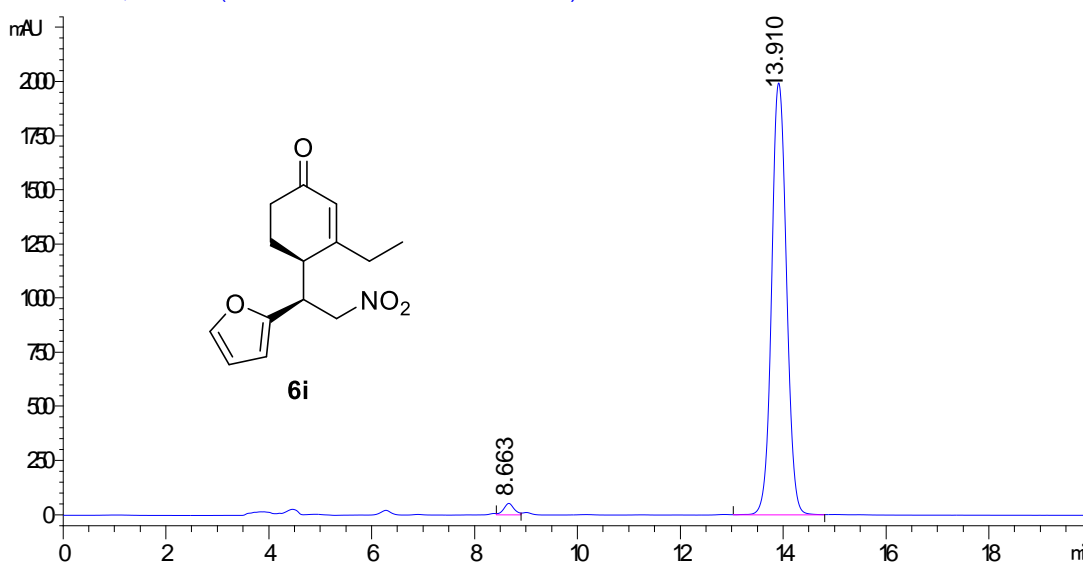

| # | Time  | Area    | Height | Width  | Symmetry | Area % |
|---|-------|---------|--------|--------|----------|--------|
| 1 | 8.663 | 777.9   | 53.9   | 0.2135 | 0.923    | 1.901  |
| 2 | 13.91 | 40153.5 | 1995.9 | 0.3133 | 0.875    | 98.099 |

**6j: (R)-4-((R)-2-nitro-1-phenylethyl)-3-propylcyclohex-2-en-1-one**

WDIA, 波長220nm(DIG-EM&1\DATA\ZCC\160817\ZCG661A\000206.D)

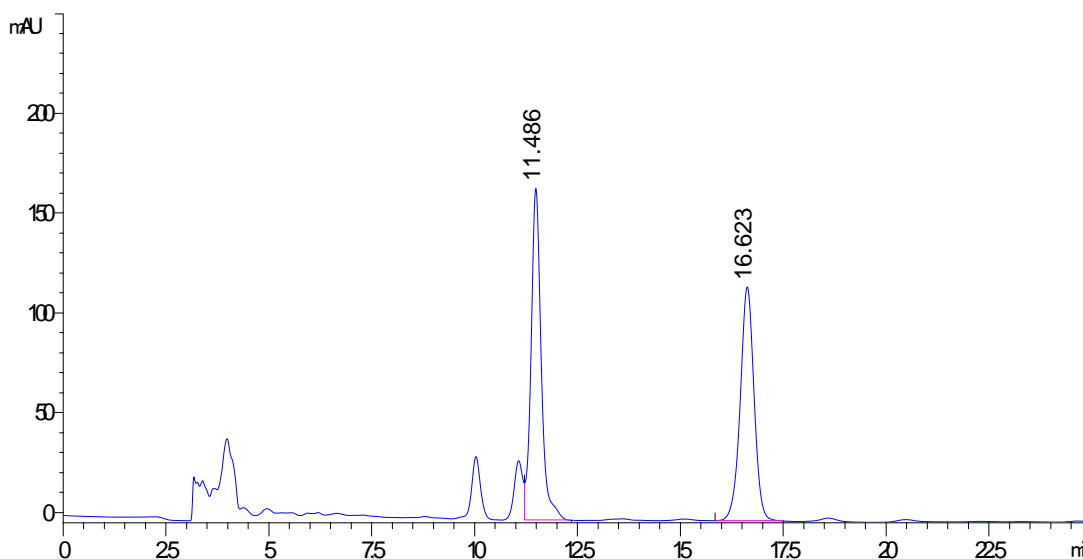

| # | Time   | Area   | Height | Width  | Symmetry | Area % |
|---|--------|--------|--------|--------|----------|--------|
| 1 | 11.486 | 2856   | 166.3  | 0.2572 | 0.829    | 50.976 |
| 2 | 16.623 | 2746.6 | 117.3  | 0.3561 | 1.007    | 49.024 |

WDIA, 波長220nm(DIG-EM&1\DATA\ZCC\160817\ZCG661A\000207.D)

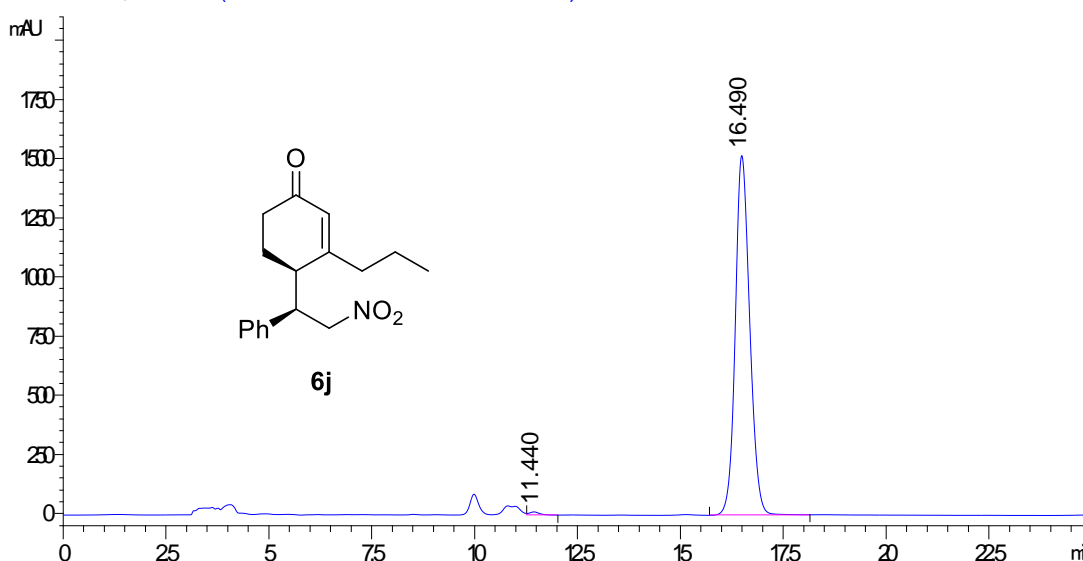

| # | Time  | Area    | Height | Width  | Symmetry | Area % |
|---|-------|---------|--------|--------|----------|--------|
| 1 | 11.44 | 271.2   | 14.2   | 0.2758 | 0.668    | 0.723  |
| 2 | 16.49 | 37255.8 | 1520.1 | 0.3733 | 0.781    | 99.277 |

**6k: (R)-3-butyl-4-((R)-2-nitro-1-phenylethyl)cyclohex-2-en-1-one**

WDIA, 波長220nm(DIC-EM&1DATAZCC160811ZCG659A000152D)

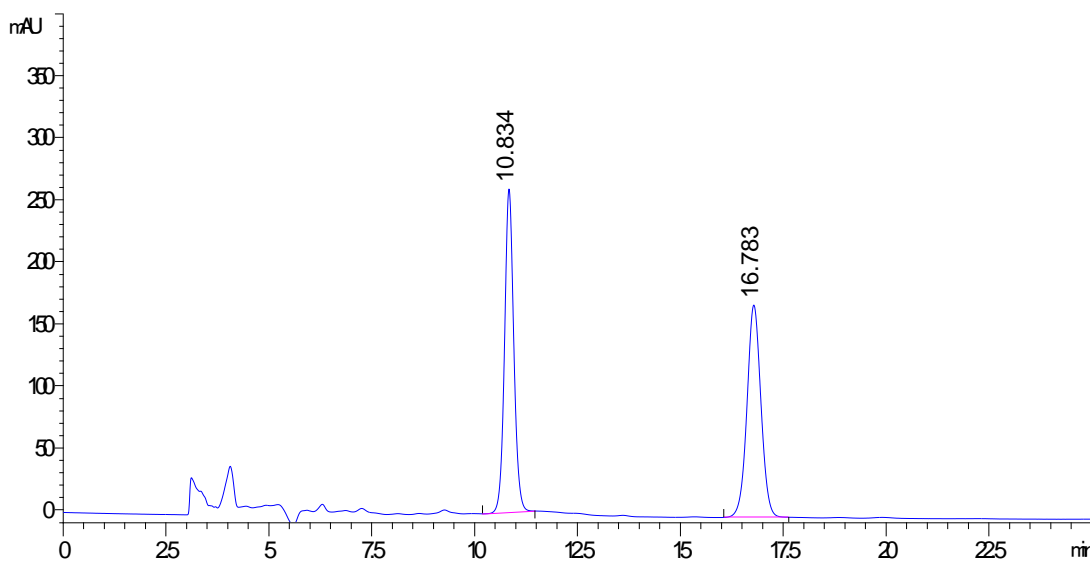

| # | Time   | Area   | Height | Width  | Symmetry | Area % |
|---|--------|--------|--------|--------|----------|--------|
| 1 | 10.834 | 4077.8 | 260.8  | 0.2377 | 0.908    | 50.274 |
| 2 | 16.783 | 4033.4 | 171.1  | 0.3624 | 0.942    | 49.726 |

WDIA, 波長220nm(DIC-EM&1DATAZCC160811ZCG659A000153D)

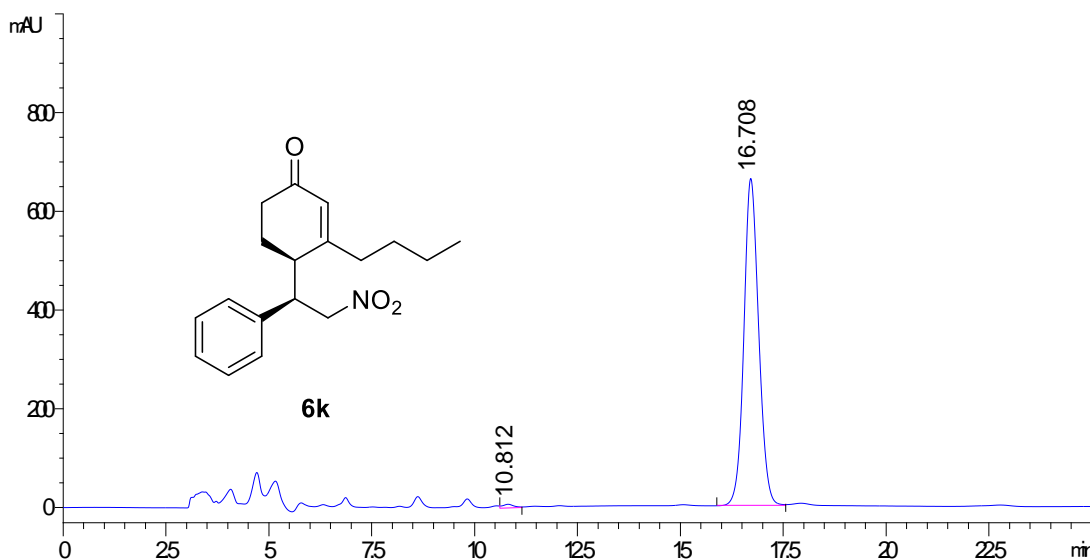

| # | Time   | Area    | Height | Width  | Symmetry | Area % |
|---|--------|---------|--------|--------|----------|--------|
| 1 | 10.812 | 158.7   | 7.9    | 0.287  | 0.795    | 0.947  |
| 2 | 16.708 | 16602.6 | 662.5  | 0.3826 | 0.840    | 99.053 |

**6l: (R)-4-((R)-2-nitro-1-phenylethyl)-3-pentylcyclohex-2-en-1-one**

WDIA, 波長=220nm(DIC-EM&1DATAZCC16081ZCG689B000154D)

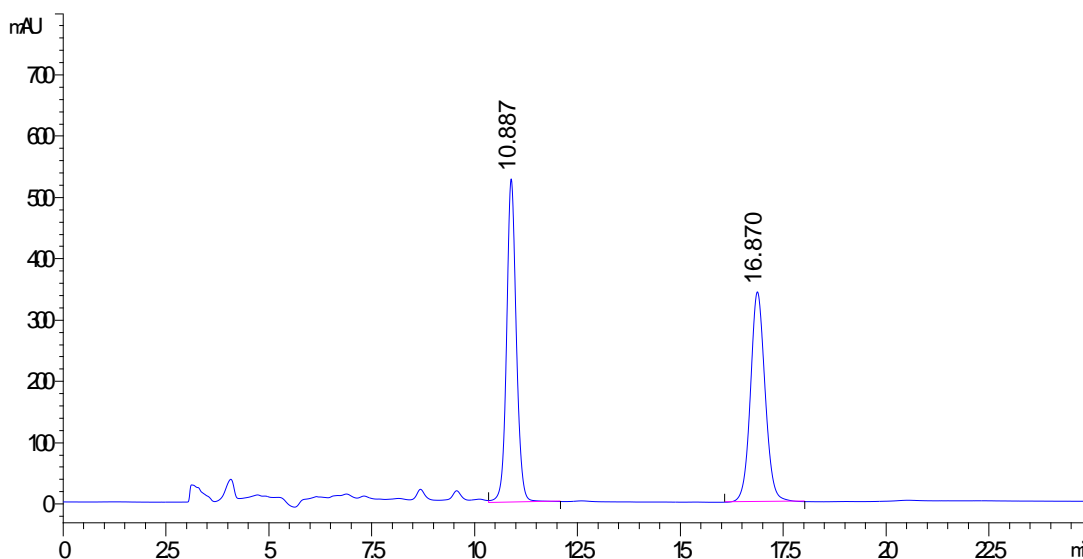

| # | Time   | Area   | Height | Width  | Symmetry | Area % |
|---|--------|--------|--------|--------|----------|--------|
| 1 | 10.887 | 8715.1 | 528    | 0.2493 | 0.874    | 50.621 |
| 2 | 16.87  | 8501.2 | 342.7  | 0.3796 | 0.867    | 49.379 |

WDIA, 波長=220nm(DIC-EM&1DATAZCC16081ZCG689B000155D)

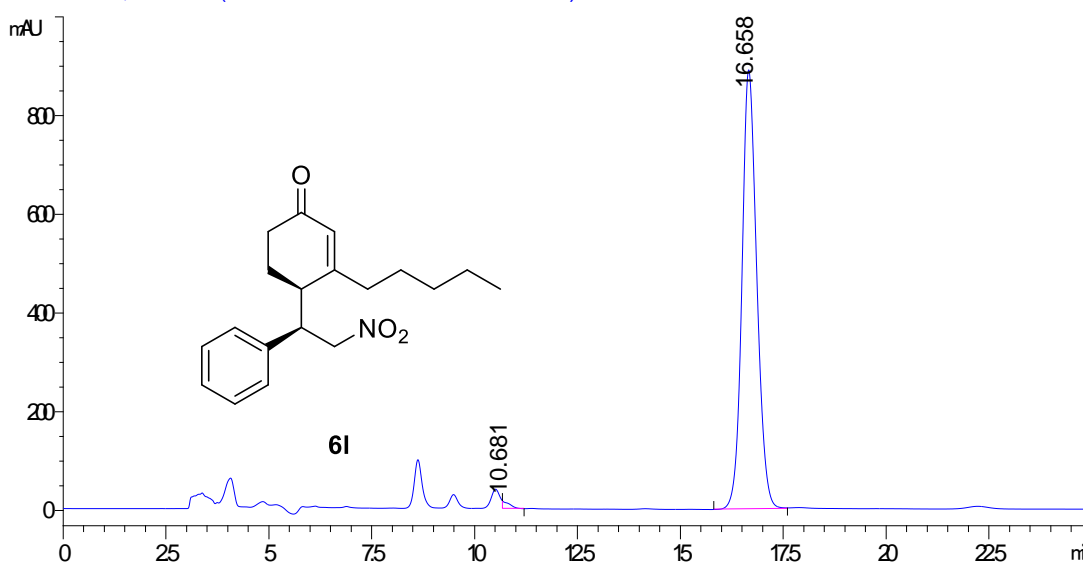

| # | Time   | Area    | Height | Width  | Symmetry | Area % |
|---|--------|---------|--------|--------|----------|--------|
| 1 | 10.681 | 183.3   | 15.5   | 0.1973 | 0.589    | 0.814  |
| 2 | 16.658 | 22339.3 | 889.4  | 0.3818 | 0.803    | 99.186 |

**6m: (R)-3-hexyl-4-((R)-2-nitro-1-phenylethyl)cyclohex-2-en-1-one**

WDIA, 波長=20nm(DIG-EM&1DATAZCC16081ZCG689C00166D)

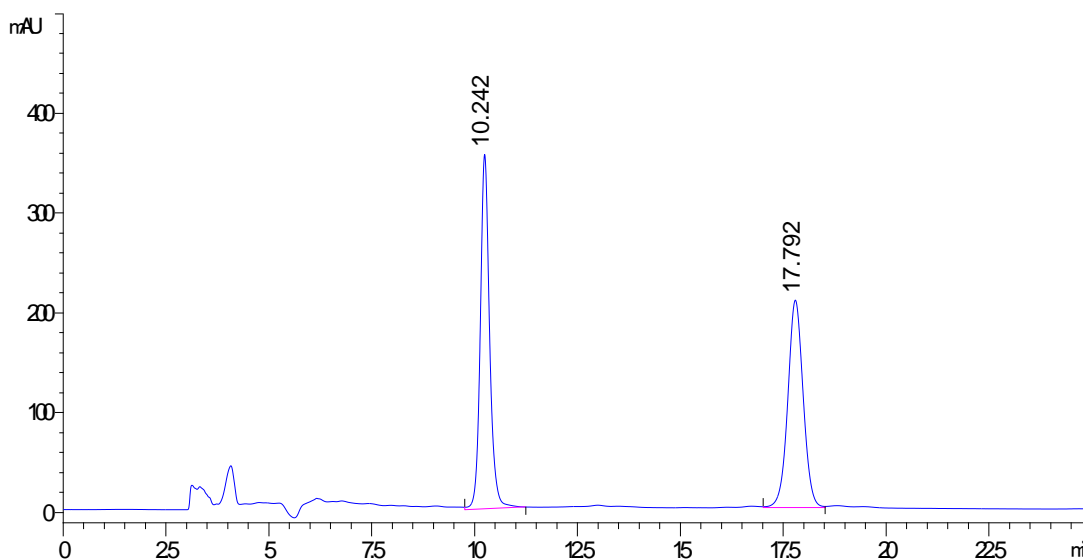

| # | Time   | Area   | Height | Width  | Symmetry | Area % |
|---|--------|--------|--------|--------|----------|--------|
| 1 | 10.242 | 5612.1 | 355.5  | 0.2366 | 0.836    | 50.833 |
| 2 | 17.792 | 5428.1 | 208.3  | 0.3986 | 0.940    | 49.167 |

WDIA, 波長=20nm(DIG-EM&1DATAZCC16081ZCG689C00168D)

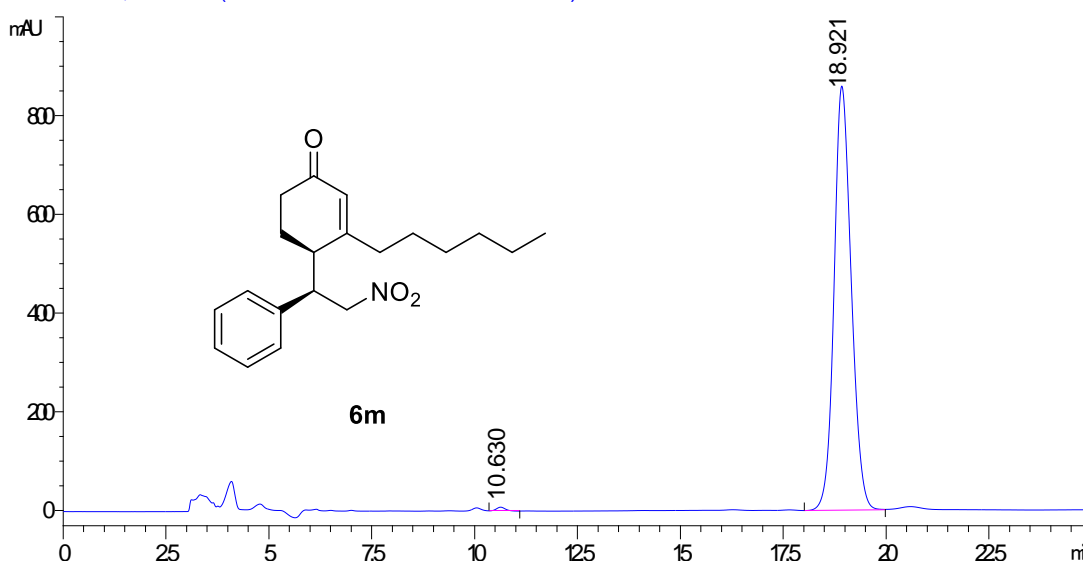

| # | Time   | Area  | Height | Width  | Symmetry | Area % |
|---|--------|-------|--------|--------|----------|--------|
| 1 | 10.63  | 129.5 | 8      | 0.2447 | 0.874    | 0.516  |
| 2 | 18.921 | 24969 | 858.9  | 0.444  | 0.791    | 99.484 |

**6n: (R)-3-benzyl-4-((R)-2-nitro-1-phenylethyl)cyclohex-2-en-1-one**

WDIA, 波長220nm(DIG-EM&1DATAZCC16081ZCG689D00189D)

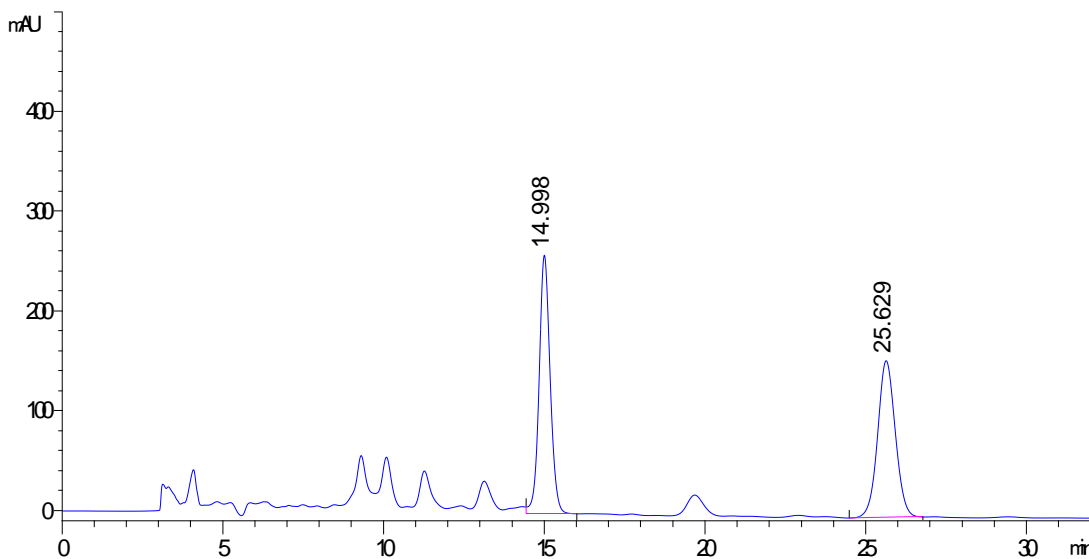

| # | Time   | Area   | Height | Width  | Symmetry | Area % |
|---|--------|--------|--------|--------|----------|--------|
| 1 | 14.998 | 6201.1 | 259.4  | 0.3633 | 0.886    | 50.836 |
| 2 | 25.629 | 5997.1 | 157.1  | 0.5865 | 0.908    | 49.164 |

WDIA, 波長220nm(DIG-EM&1DATAZCC16081ZCG689D00160D)

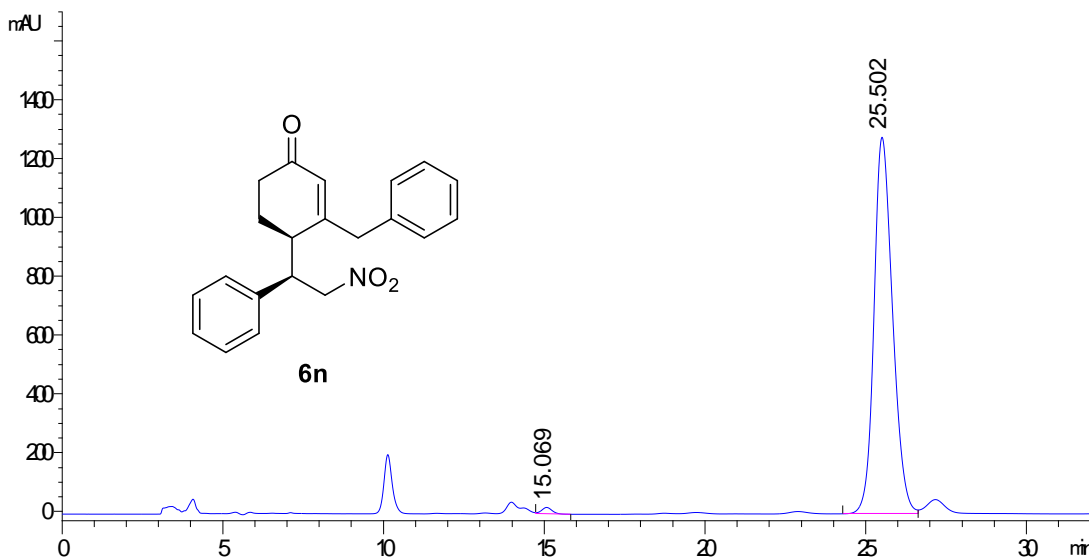

| # | Time   | Area    | Height | Width  | Symmetry | Area % |
|---|--------|---------|--------|--------|----------|--------|
| 1 | 15.069 | 538.2   | 22.8   | 0.3565 | 0.928    | 1.037  |
| 2 | 25.502 | 51372.1 | 1279.9 | 0.6124 | 0.739    | 98.963 |

**6o: (R)-4-((R)-2-nitro-1-phenylethyl)-3-phenethylcyclohex-2-en-1-one**

WDIA 波長220nm(D:\G-EM\21\DATA\ZCC\160817\ZCG661E00028D)

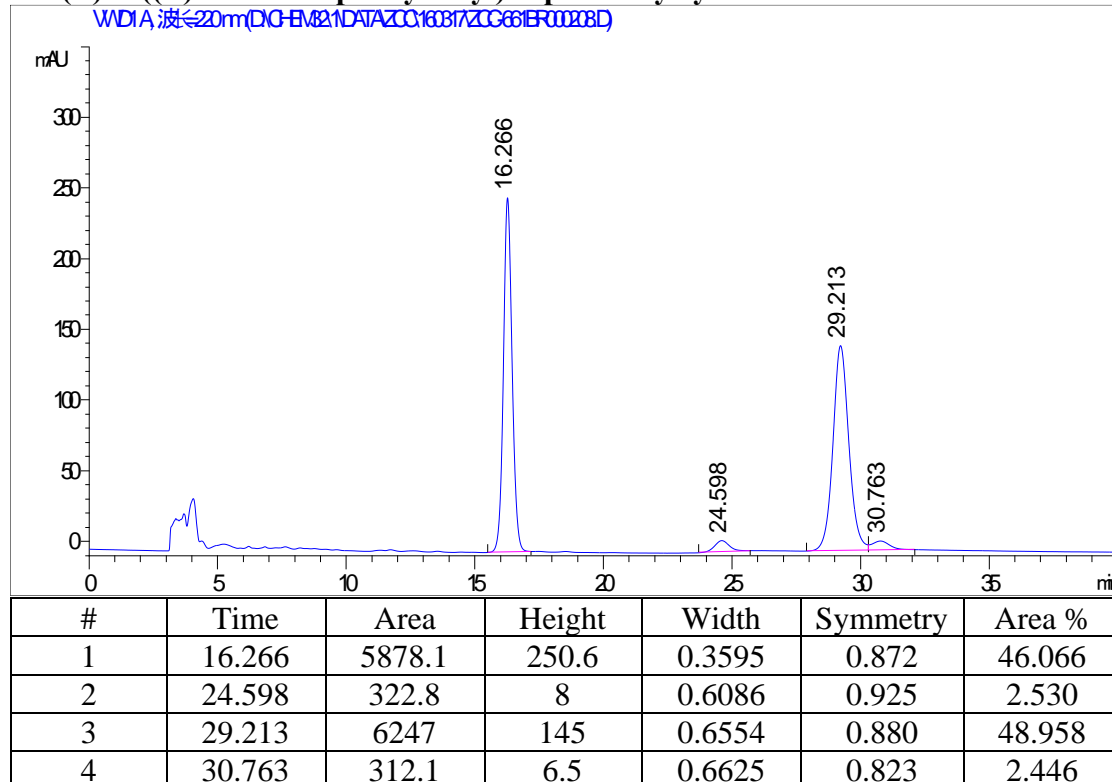

WDIA 波長220nm(D:\G-EM\21\DATA\ZCC\160817\ZCG661E00029D)

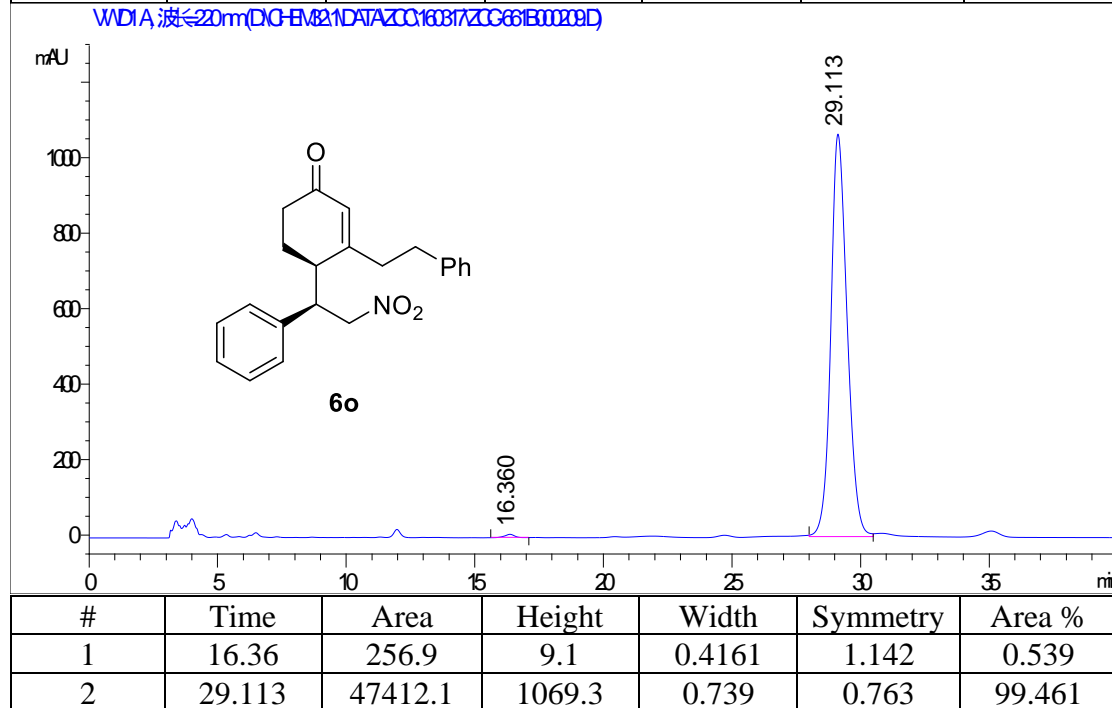



**6p: (R)-4-((R)-1-(4-bromophenyl)-2-nitroethyl)-3-butylcyclohex-2-en-1-one**

WDIA, 波長220nm(D:\G-EM\21DATA\ZC\160817ZCG661C00021.D)

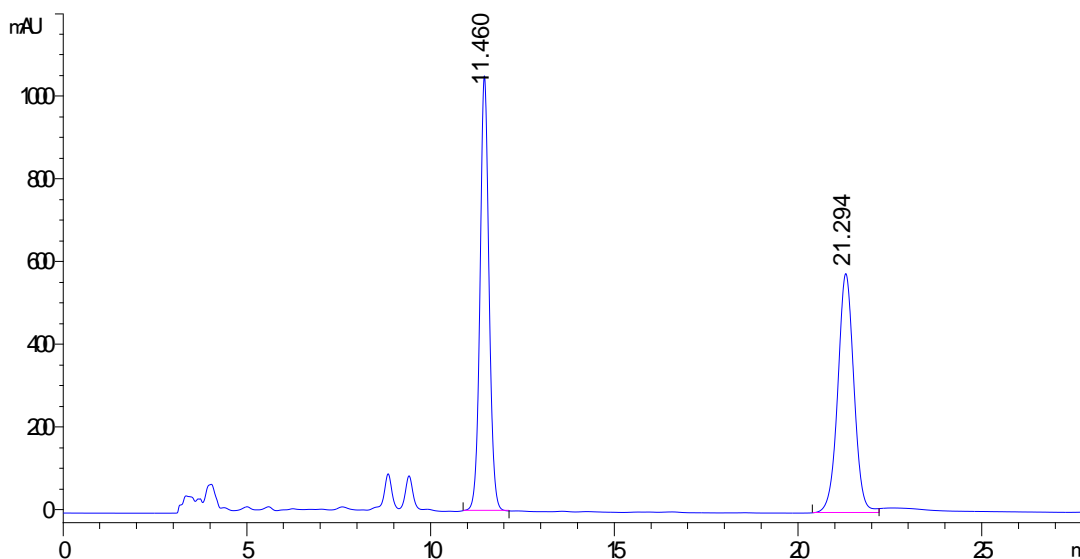

| # | Time   | Area    | Height | Width  | Symmetry | Area % |
|---|--------|---------|--------|--------|----------|--------|
| 1 | 11.46  | 17919.5 | 1052.2 | 0.2838 | 0.923    | 50.349 |
| 2 | 21.294 | 17671.3 | 578.8  | 0.5089 | 0.948    | 49.651 |

WDIA, 波長220nm(D:\G-EM\21DATA\ZC\160817ZCG661C00021.D)

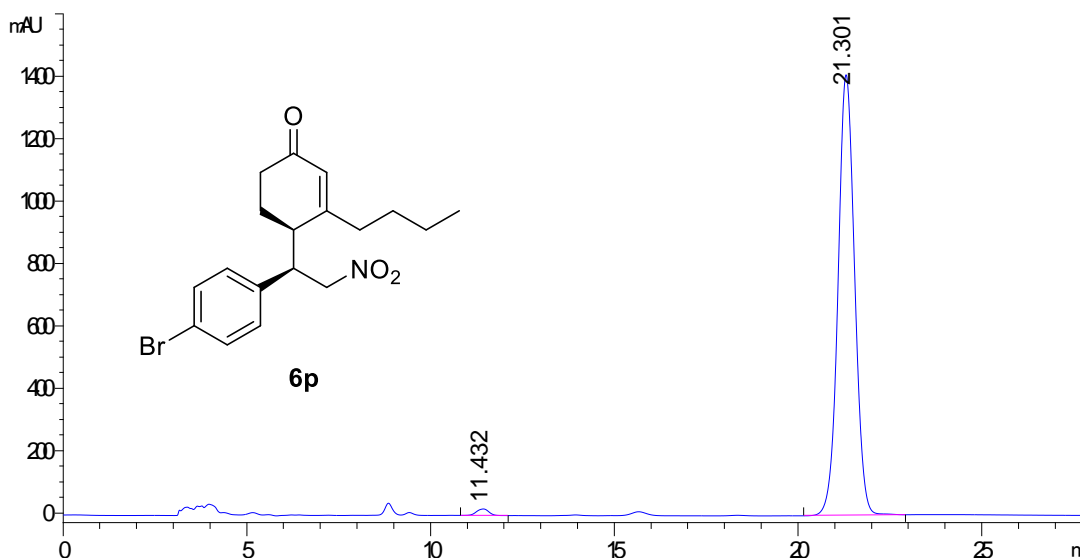

| # | Time   | Area    | Height | Width  | Symmetry | Area % |
|---|--------|---------|--------|--------|----------|--------|
| 1 | 11.432 | 493.6   | 21     | 0.3764 | 1.225    | 1.101  |
| 2 | 21.301 | 44323.6 | 1411.9 | 0.4842 | 0.906    | 98.899 |

**6q: (R)-6-((R)-2-nitro-1-phenylethyl)-5,6-dihydro-[1,1'-biphenyl]-3(4H)-one**

WDA\Adergh-254m(DHRC\CC2019\23\ZCY102A\097D)

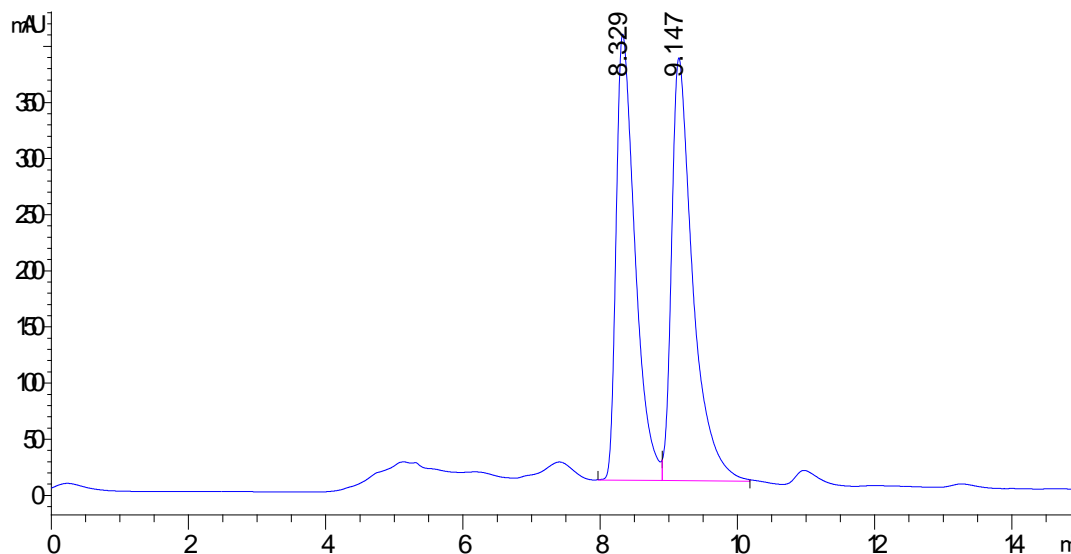

| # | Time  | Area   | Height | Width  | Symmetry | Area % |
|---|-------|--------|--------|--------|----------|--------|
| 1 | 8.329 | 7624   | 397.4  | 0.3197 | 0        | 48.483 |
| 2 | 9.147 | 8101.1 | 376.6  | 0.3585 | 0.496    | 51.517 |

WDA\Adergh-254m(DHRC\CC2019\23\ZCY102A\096D)

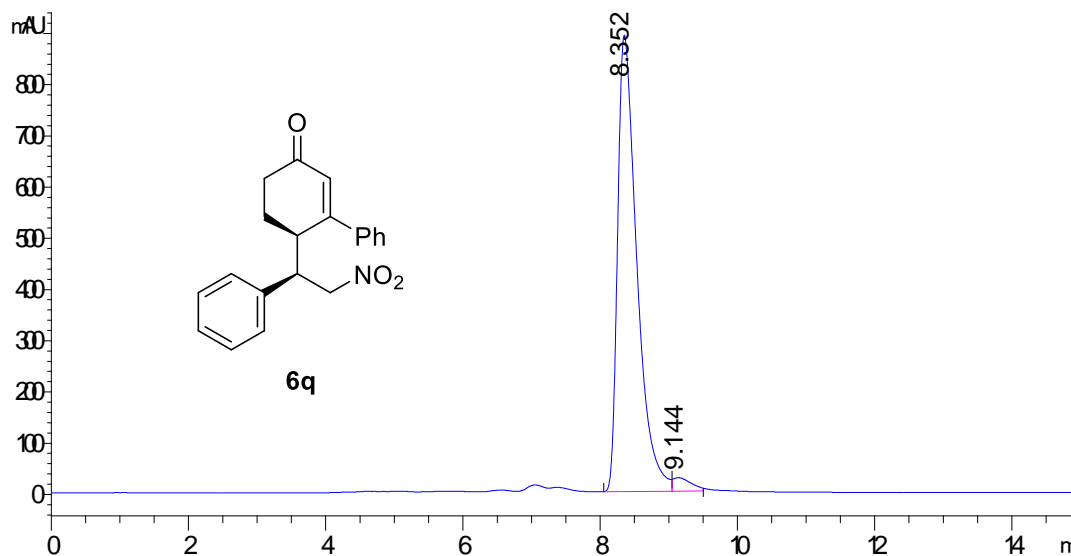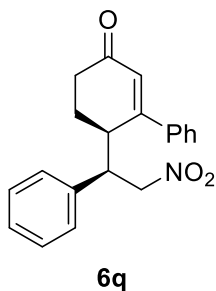

| # | Time  | Area    | Height | Width  | Symmetry | Area % |
|---|-------|---------|--------|--------|----------|--------|
| 1 | 8.352 | 17335.2 | 891.1  | 0.3242 | 0        | 97.278 |
| 2 | 9.144 | 485.1   | 26.3   | 0.3069 | 0.423    | 2.722  |

**6r: (R)-3',5'-dimethoxy-6-((R)-2-nitro-1-phenylethyl)-5,6-dihydro-[1,1'-biphenyl]-3(4H)-one**

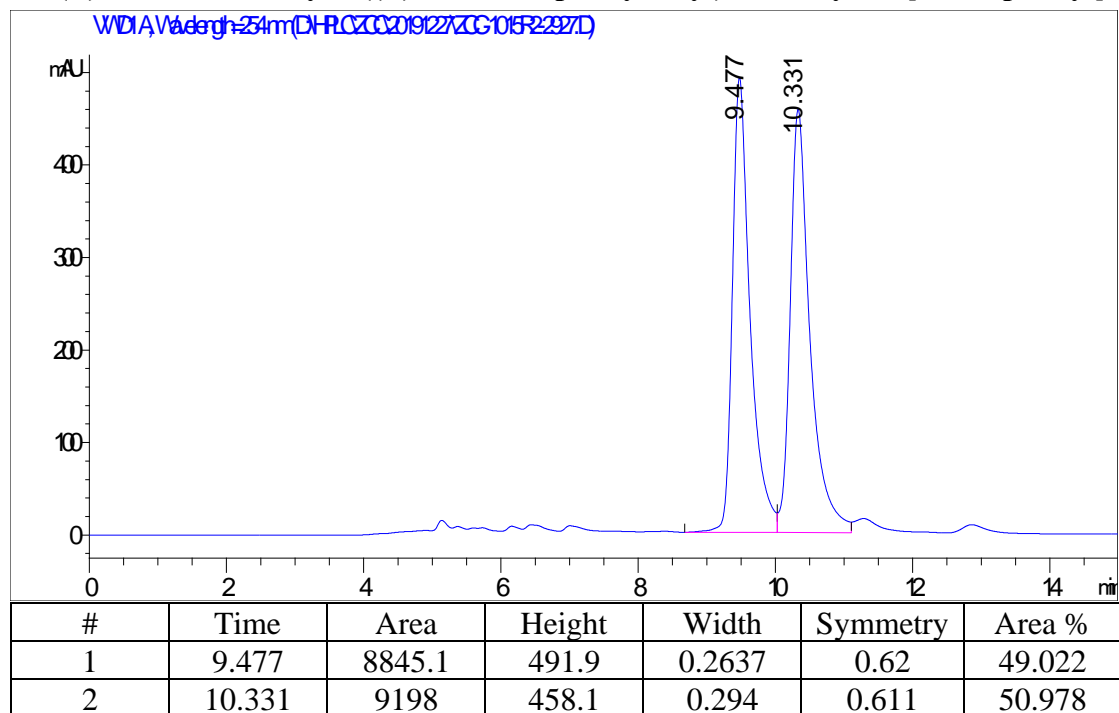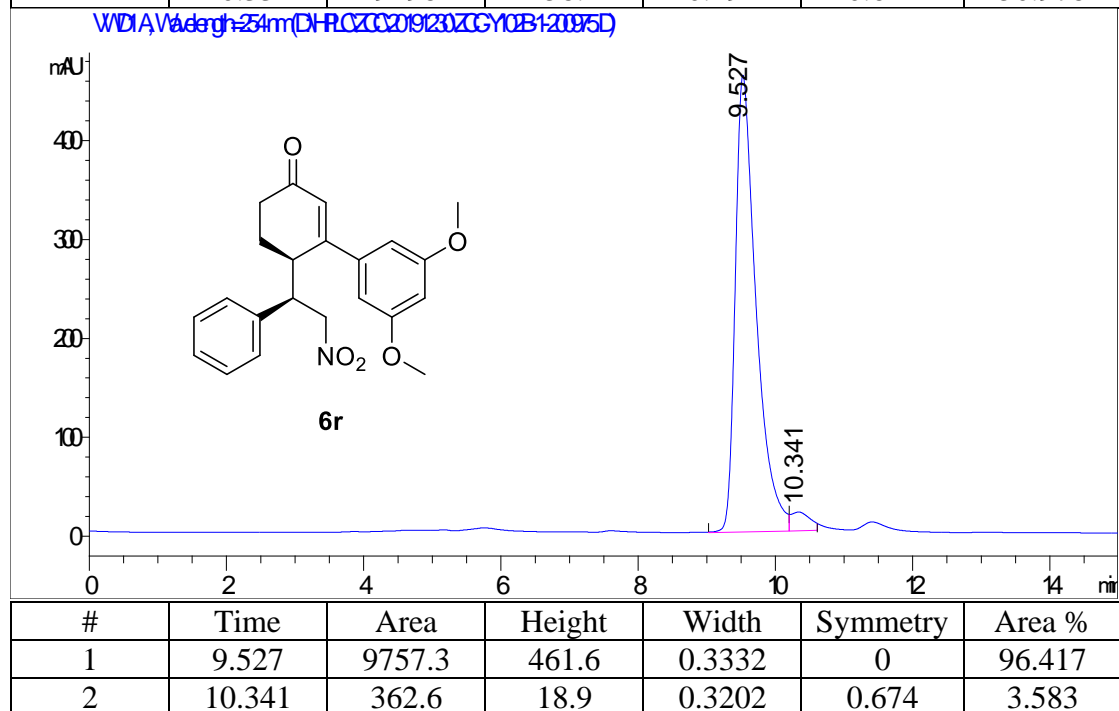

**6s: (R)-6-((R)-2-nitro-1-phenylethyl)-3',5'-bis(trifluoromethyl)-5,6-dihydro-[1,1'-biphenyl]-3(4H)-one**

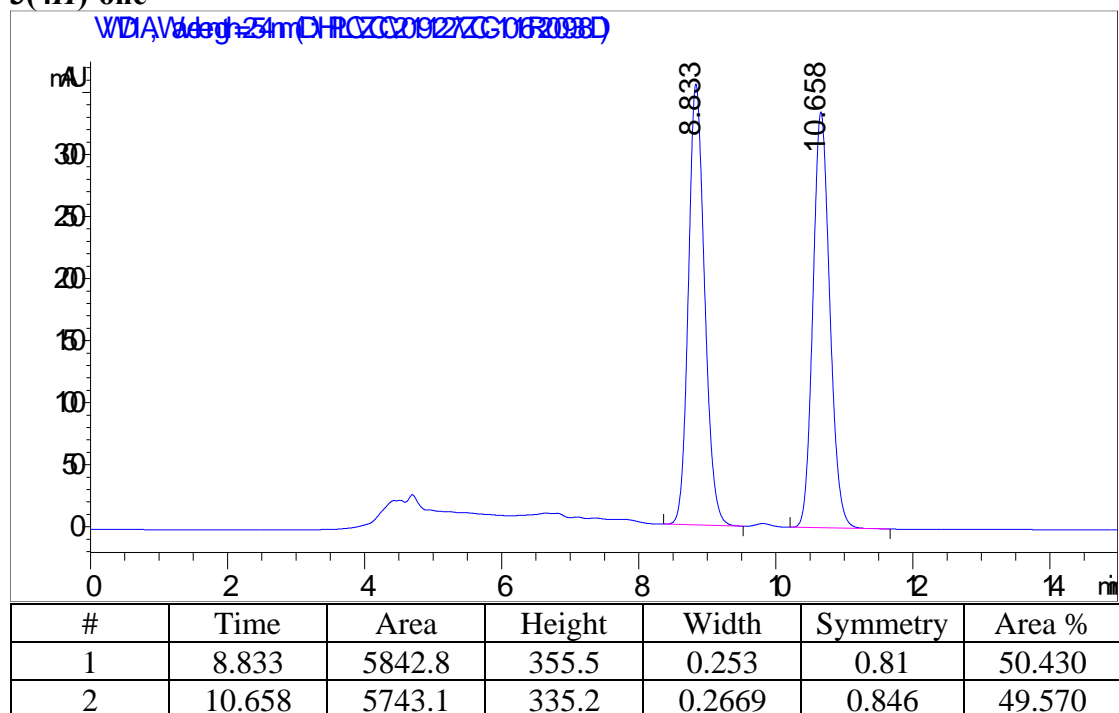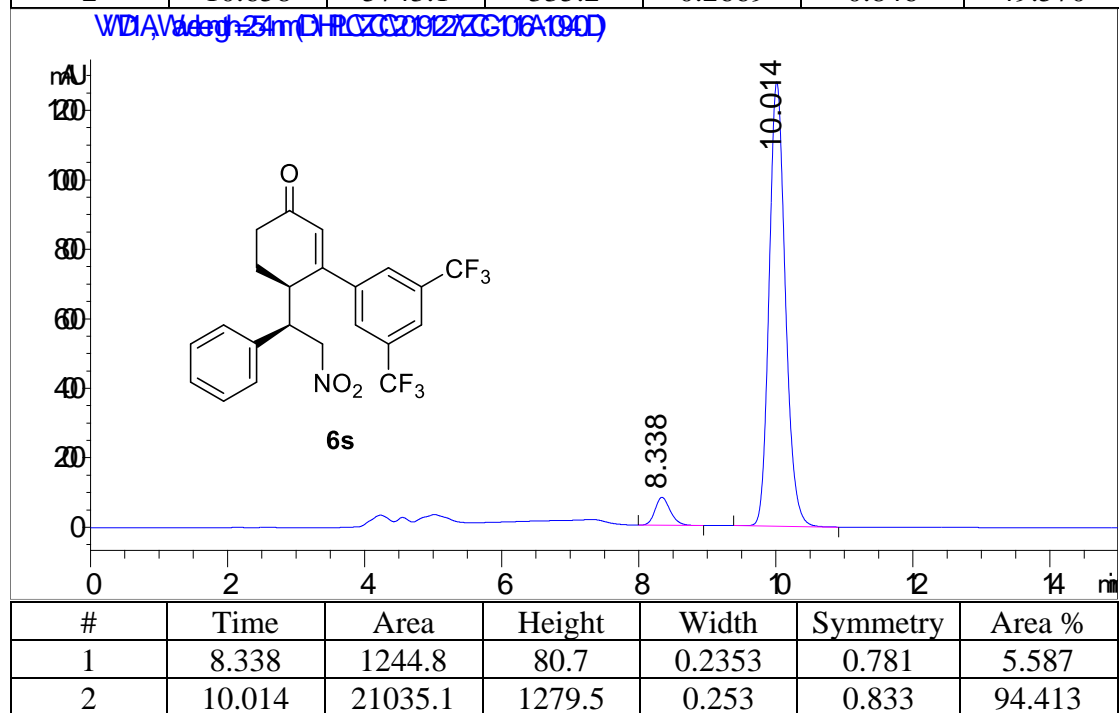

**6t: (R)-6-((R)-1-(4-bromophenyl)-2-nitroethyl)-5,6-dihydro-[1,1'-biphenyl]-3(4H)-one**

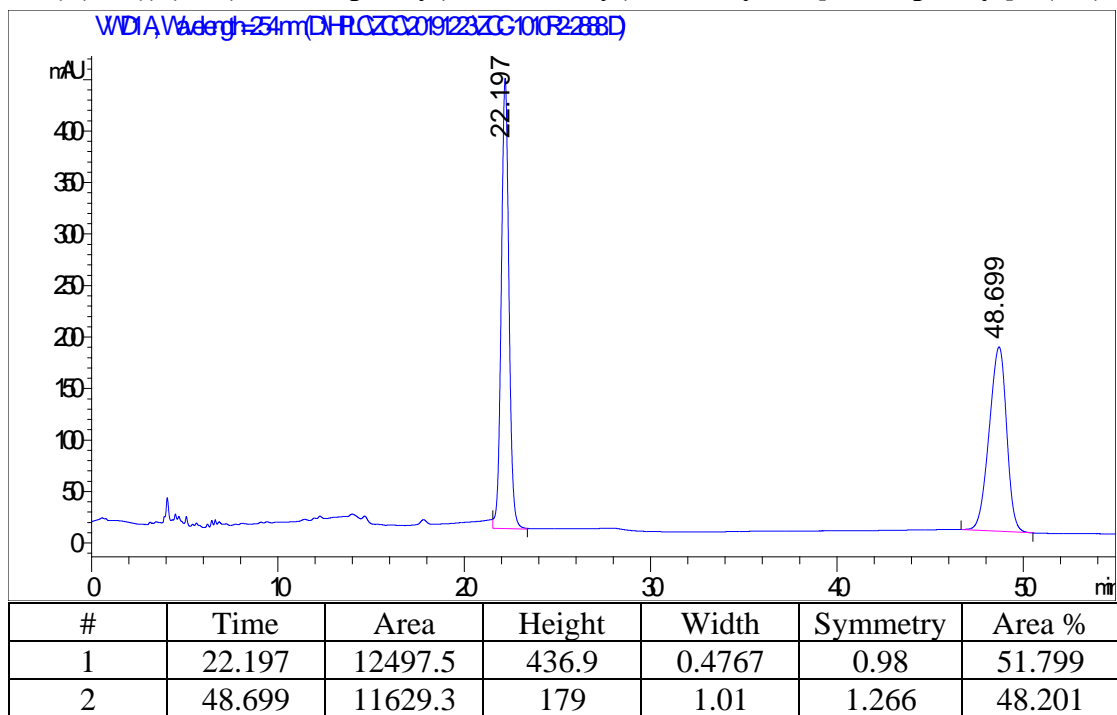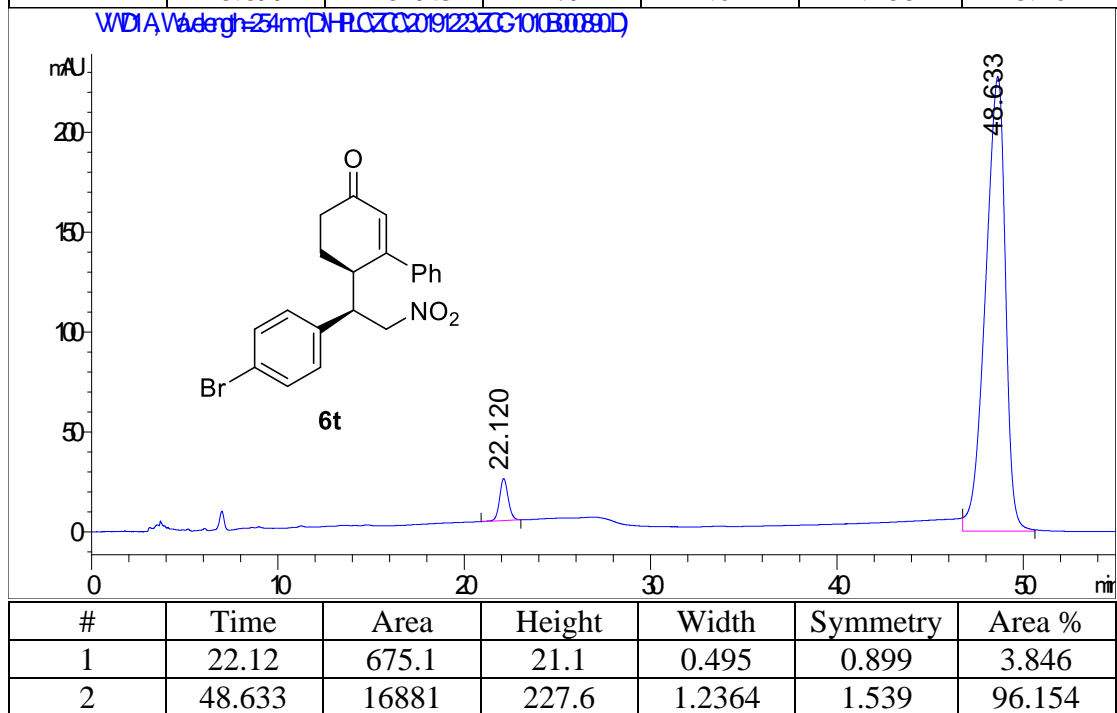

**6u: (R)-4-((R)-2-nitro-1-phenylethyl)-3-(phenylethynyl)cyclohex-2-en-1-one**

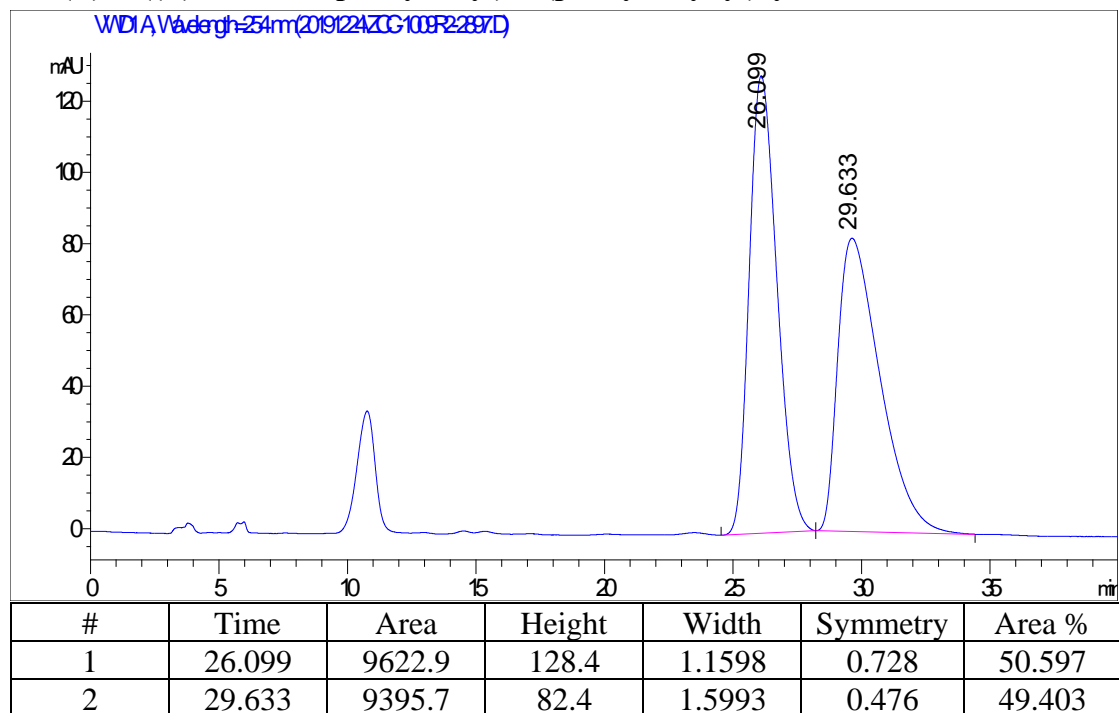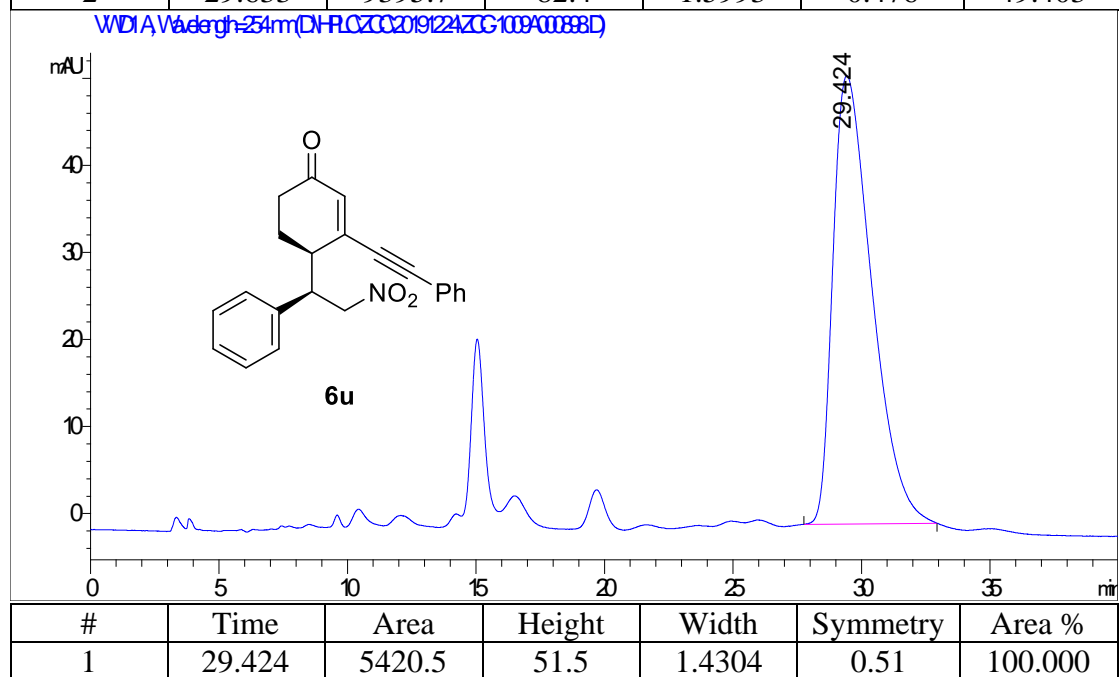

**7a: (S)-3-ethyl-4-((R)-2-nitro-1-phenylethyl)cyclohex-2-en-1-one**

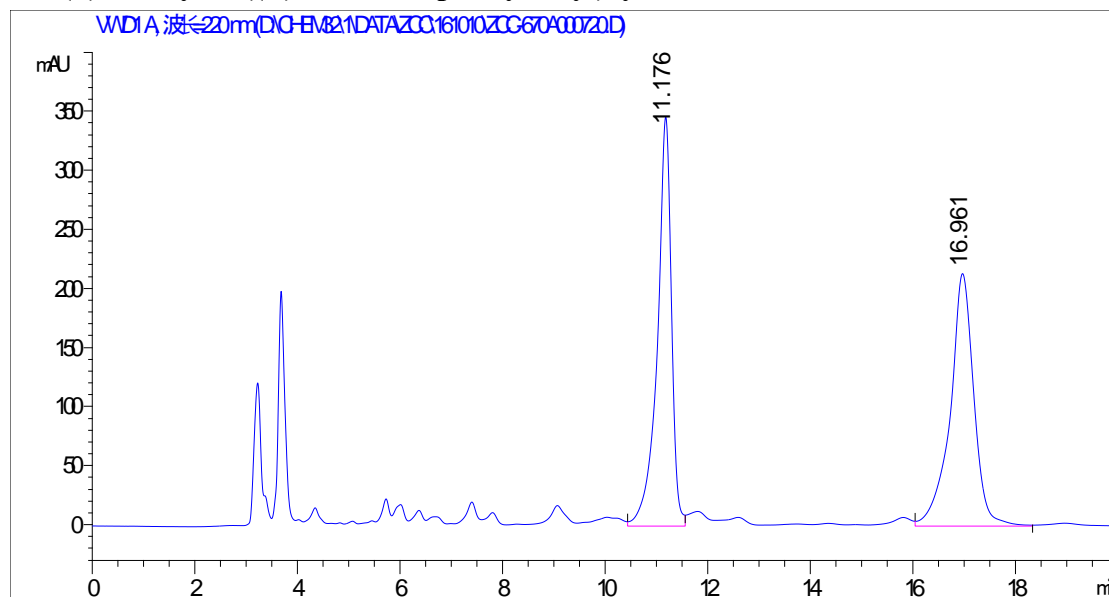

| # | Time   | Area   | Height | Width  | Symmetry | Area % |
|---|--------|--------|--------|--------|----------|--------|
| 1 | 11.176 | 6651.8 | 346.8  | 0.2791 | 1.456    | 48.974 |
| 2 | 16.961 | 6930.7 | 214.3  | 0.472  | 1.074    | 51.026 |

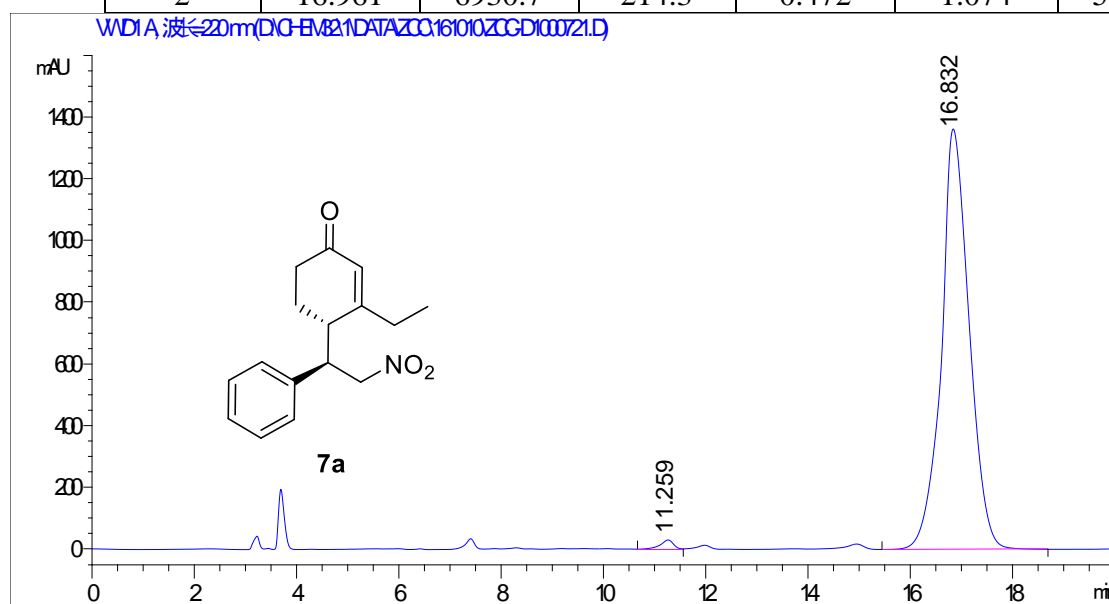

| # | Time   | Area    | Height | Width  | Symmetry | Area % |
|---|--------|---------|--------|--------|----------|--------|
| 1 | 11.259 | 597.8   | 31     | 0.2786 | 1.514    | 1.150  |
| 2 | 16.832 | 51367.3 | 1361.8 | 0.5624 | 0.752    | 98.850 |

**7c: (S)-3-ethyl-4-((R)-1-(4-methoxyphenyl)-2-nitroethyl)cyclohex-2-en-1-one**

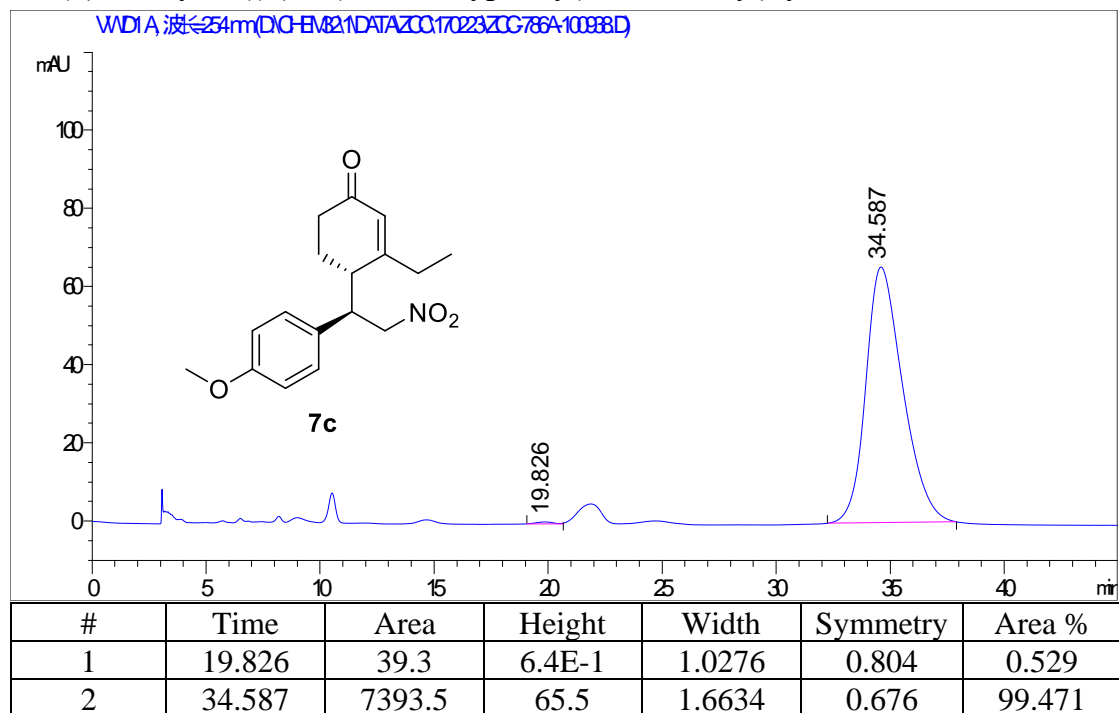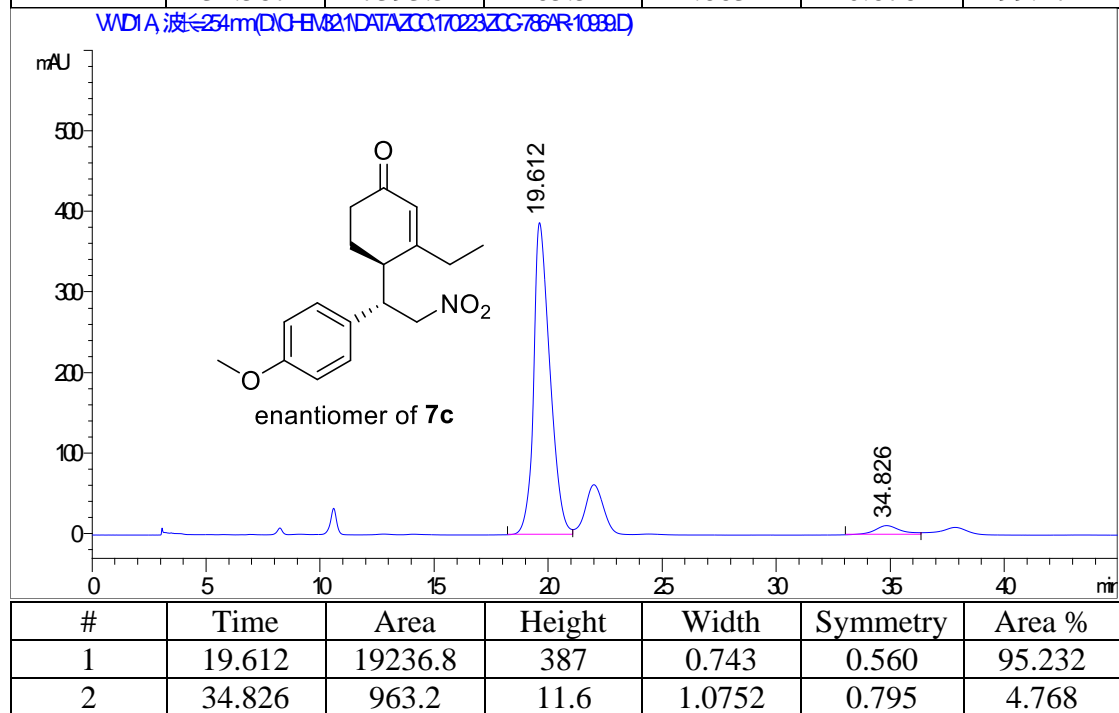



7d: (S)-3-ethyl-4-((R)-1-(4-fluorophenyl)-2-nitroethyl)cyclohex-2-en-1-one

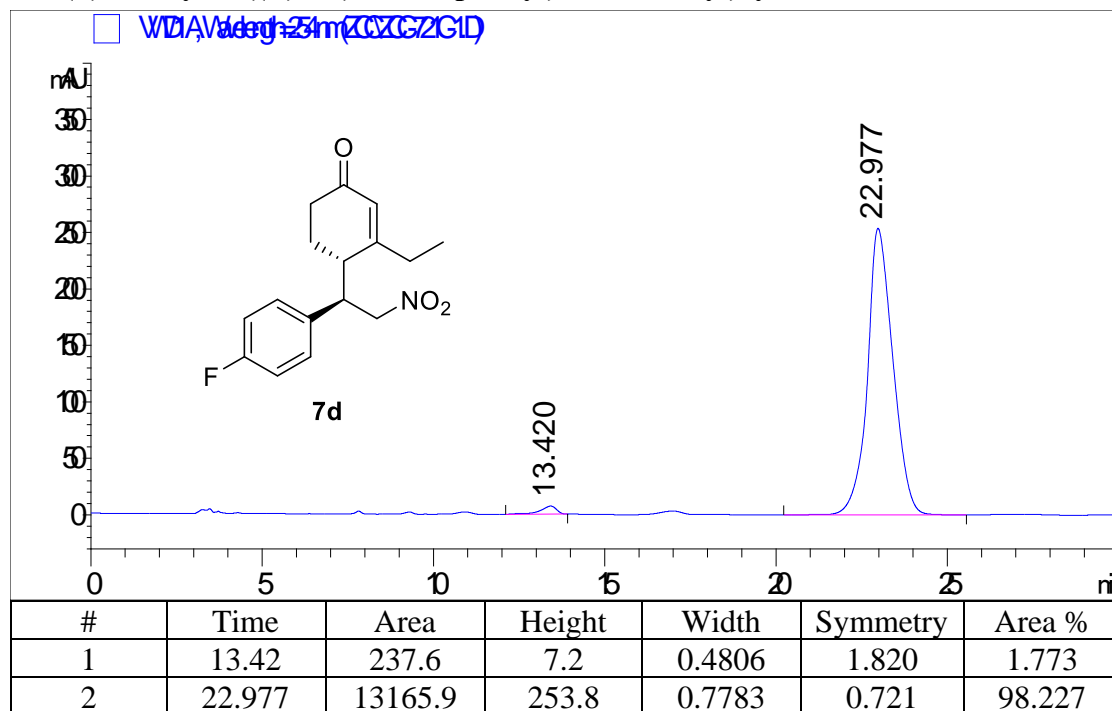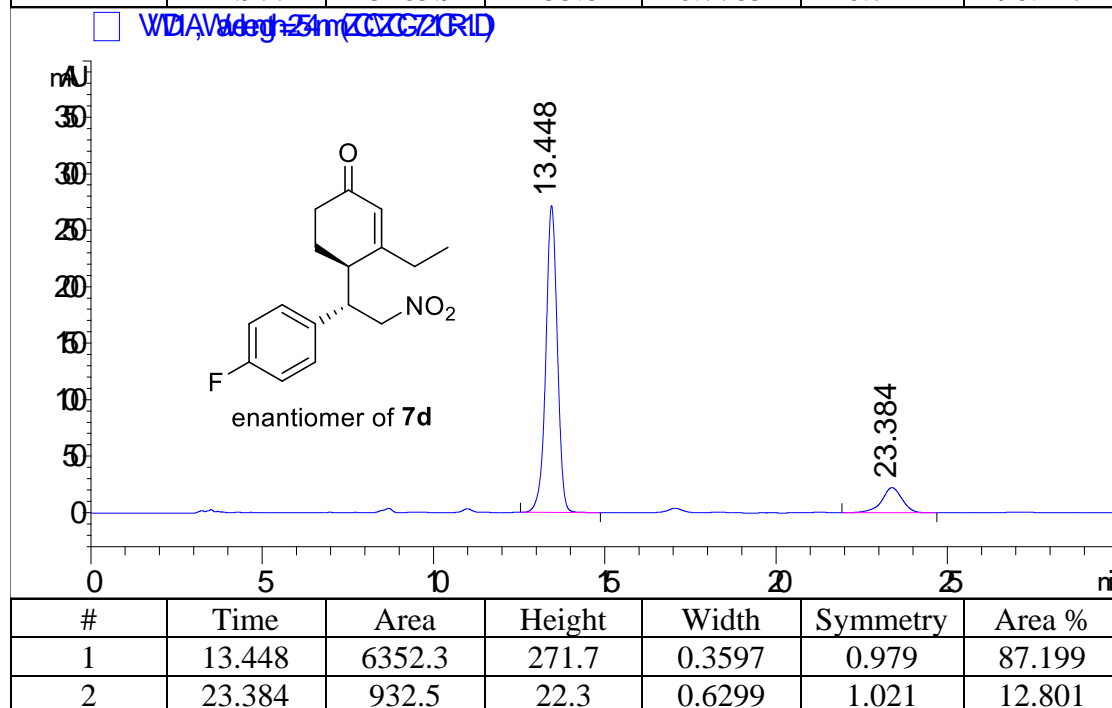

**7e: (S)-4-((R)-1-(4-chlorophenyl)-2-nitroethyl)-3-ethylcyclohex-2-en-1-one**

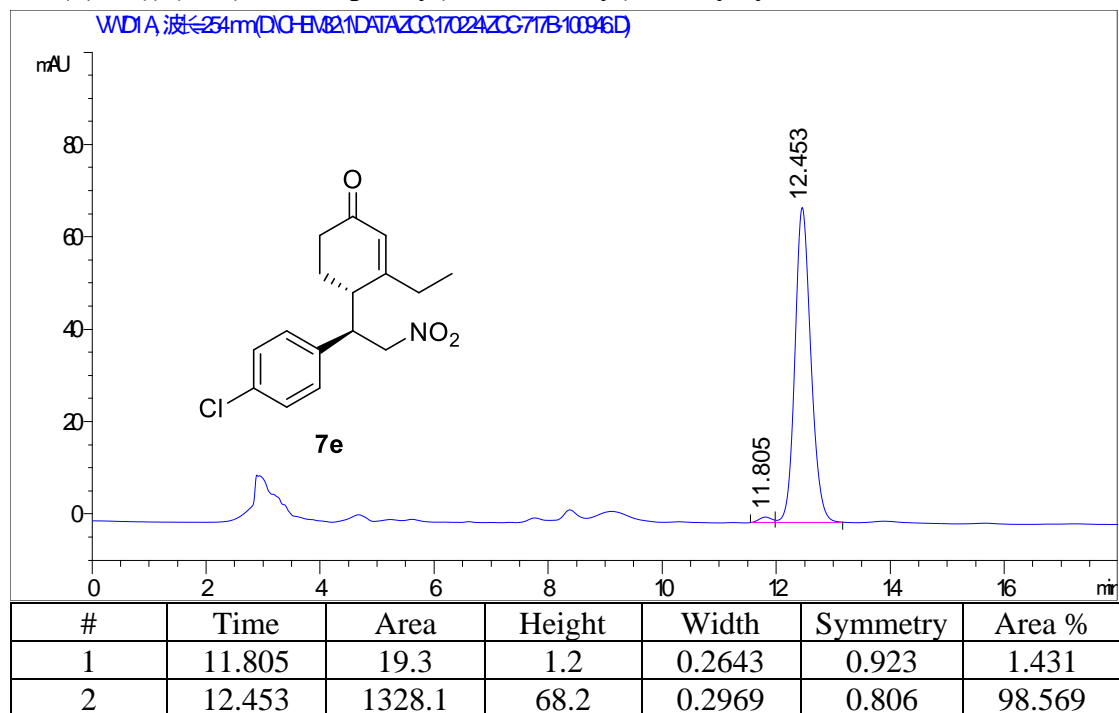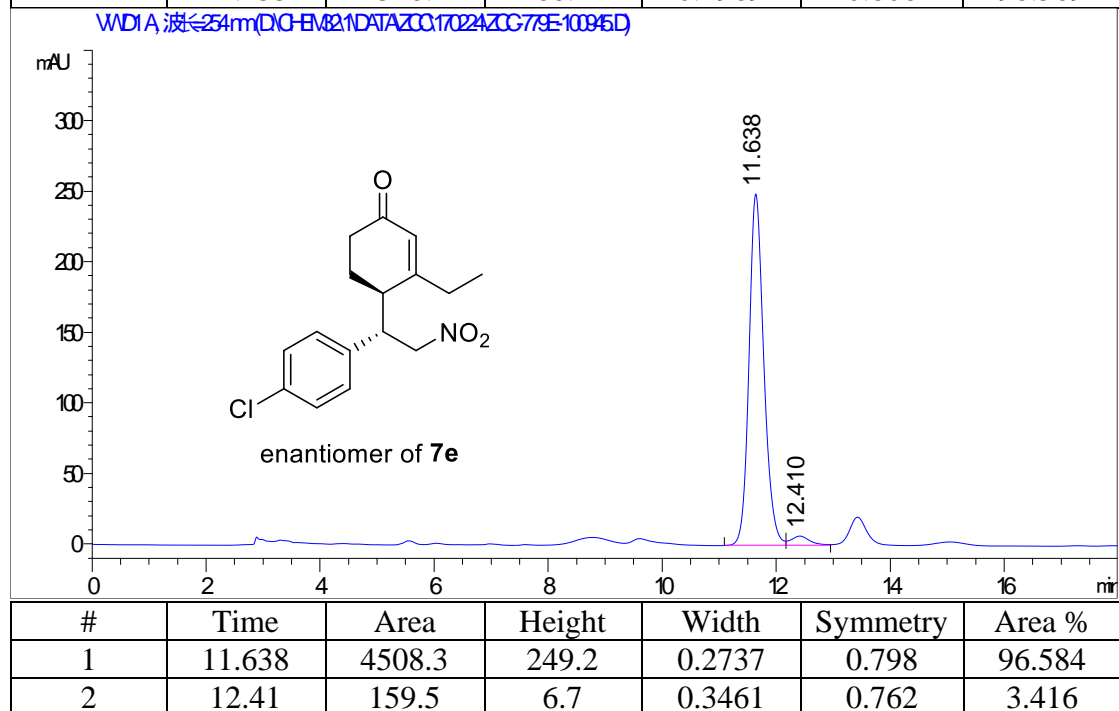

7f: (S)-4-((R)-1-(4-bromophenyl)-2-nitroethyl)-3-ethylcyclohex-2-en-1-one

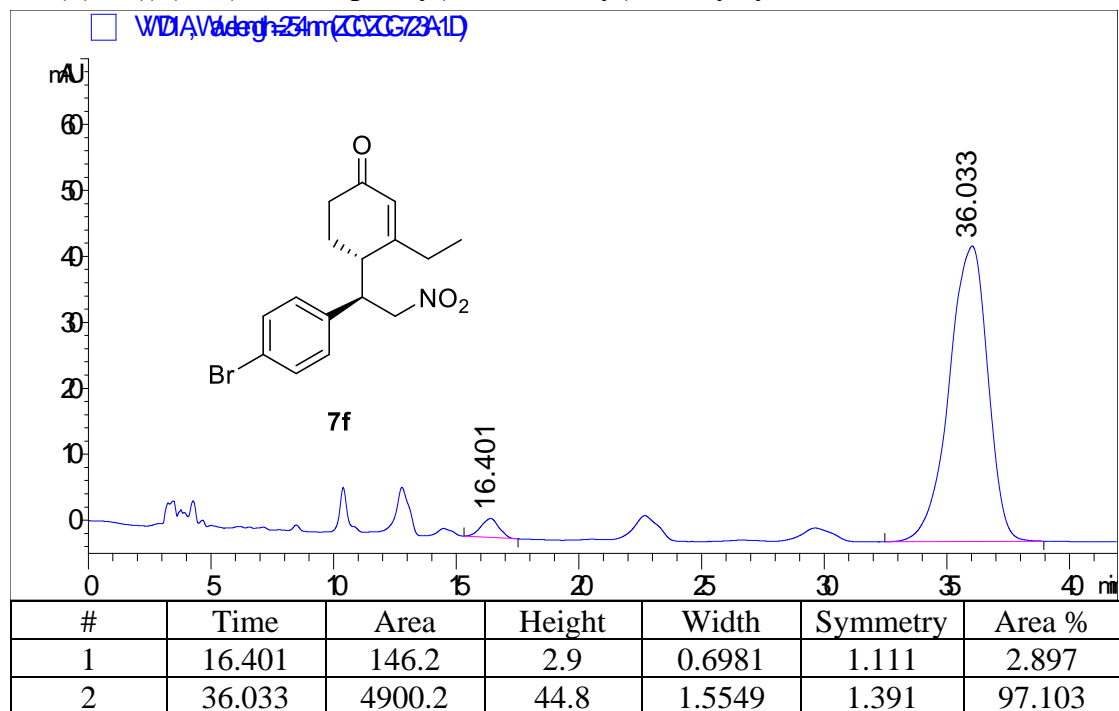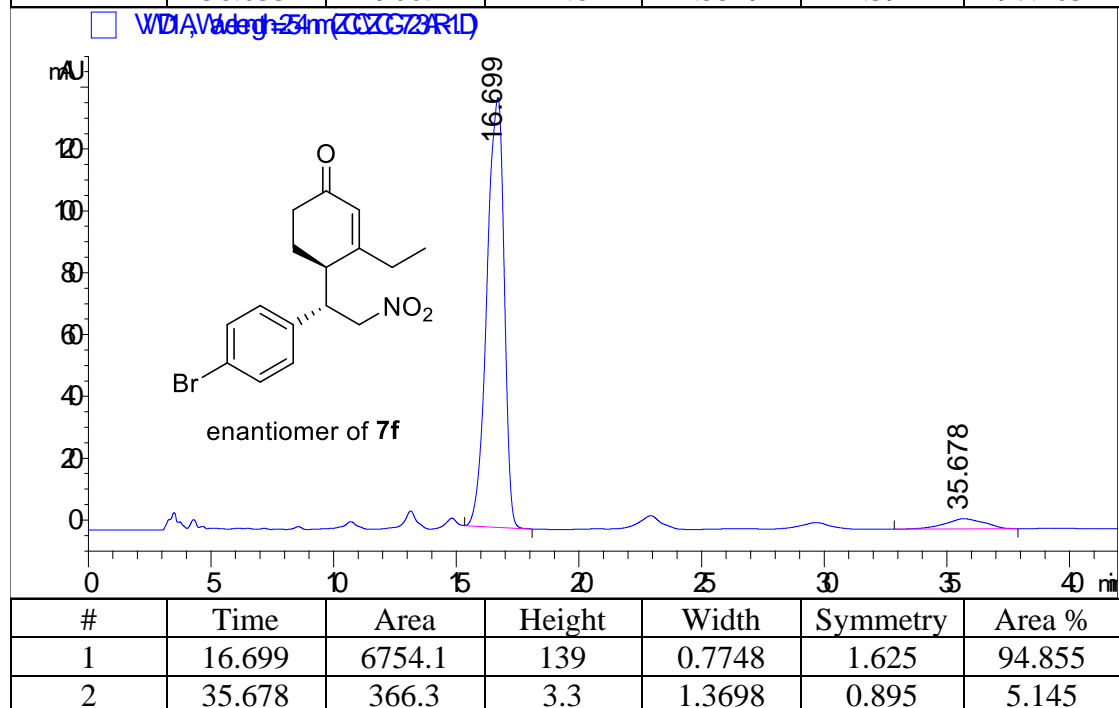

**7h: (S)-3-ethyl-4-((R)-1-(naphthalen-2-yl)-2-nitroethyl)cyclohex-2-en-1-one**

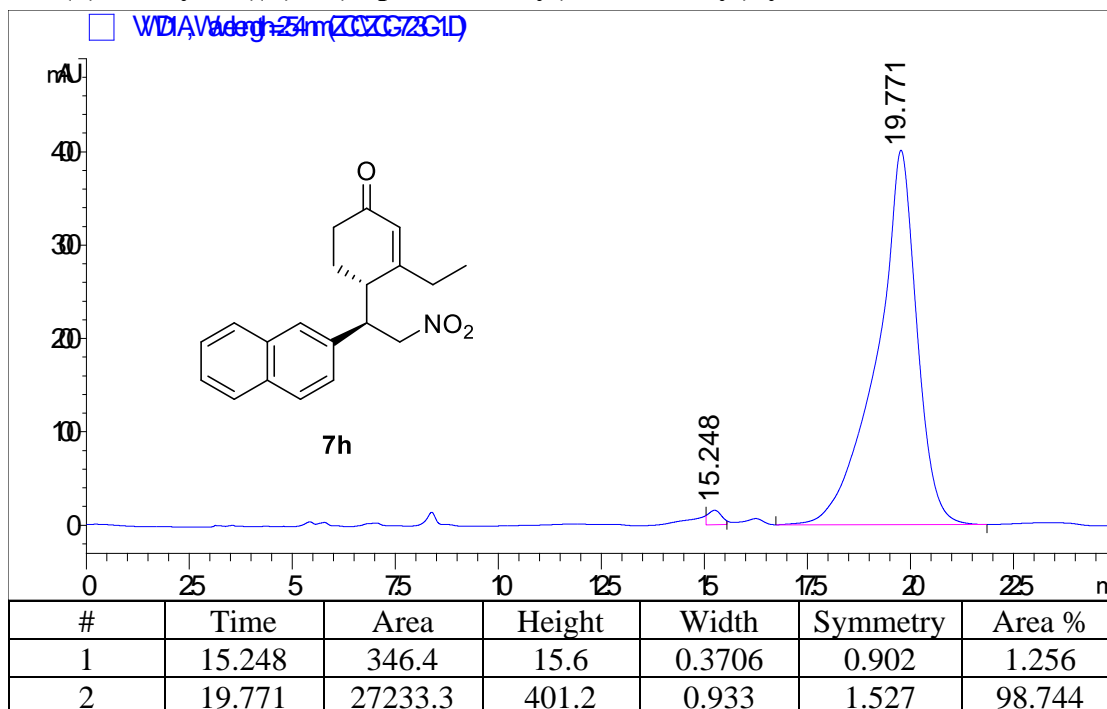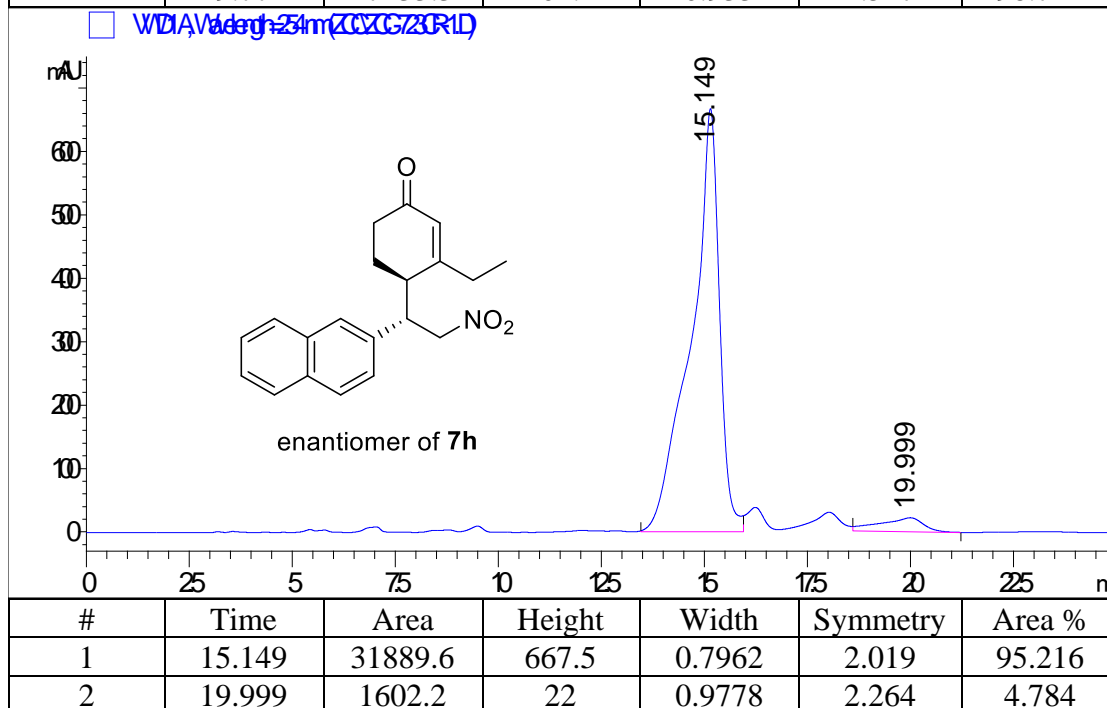

7i: (S)-3-ethyl-4-((S)-1-(furan-2-yl)-2-nitroethyl)cyclohex-2-en-1-one

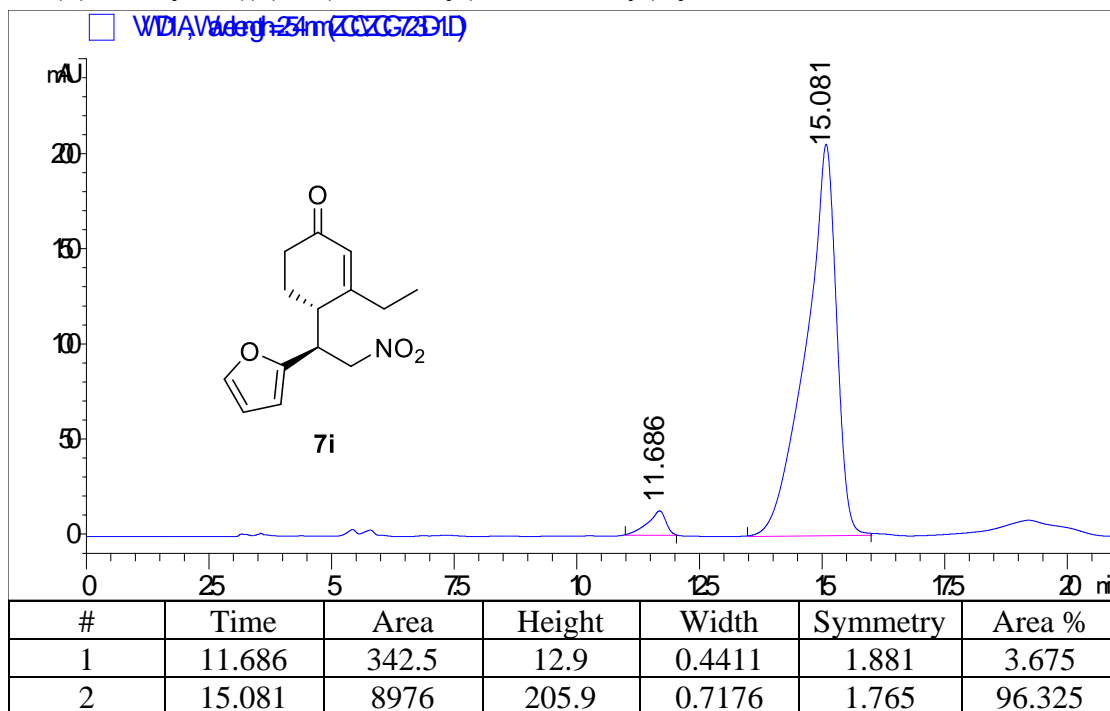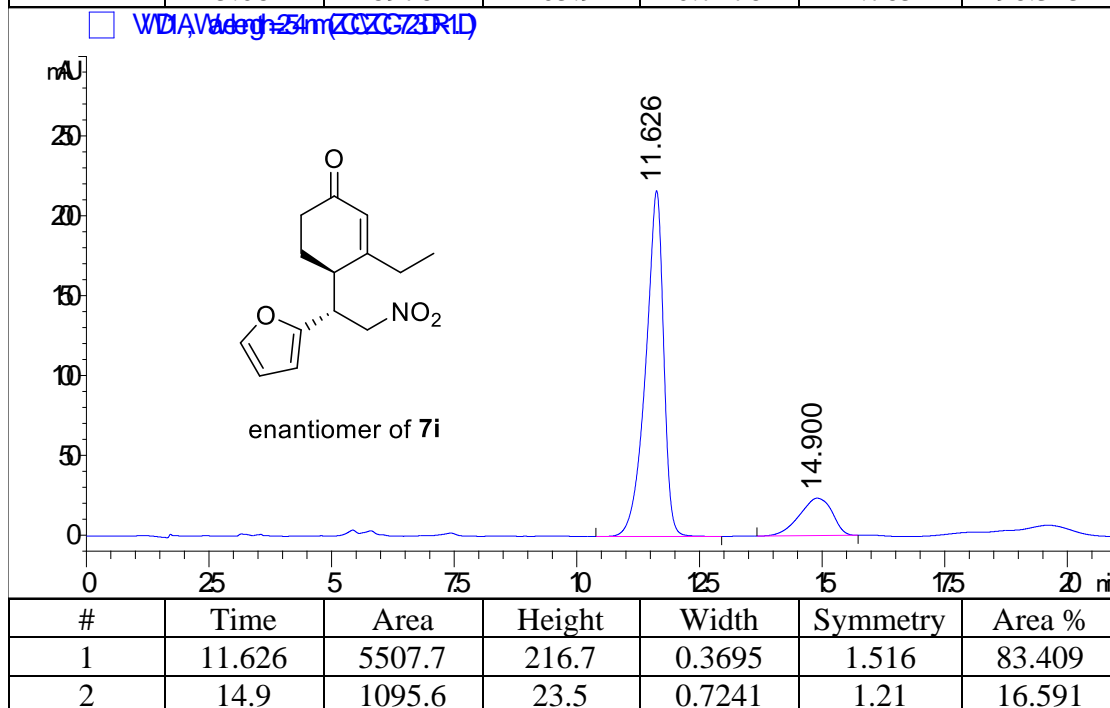

**7j: (S)-4-((R)-2-nitro-1-phenylethyl)-3-propylcyclohex-2-en-1-one**

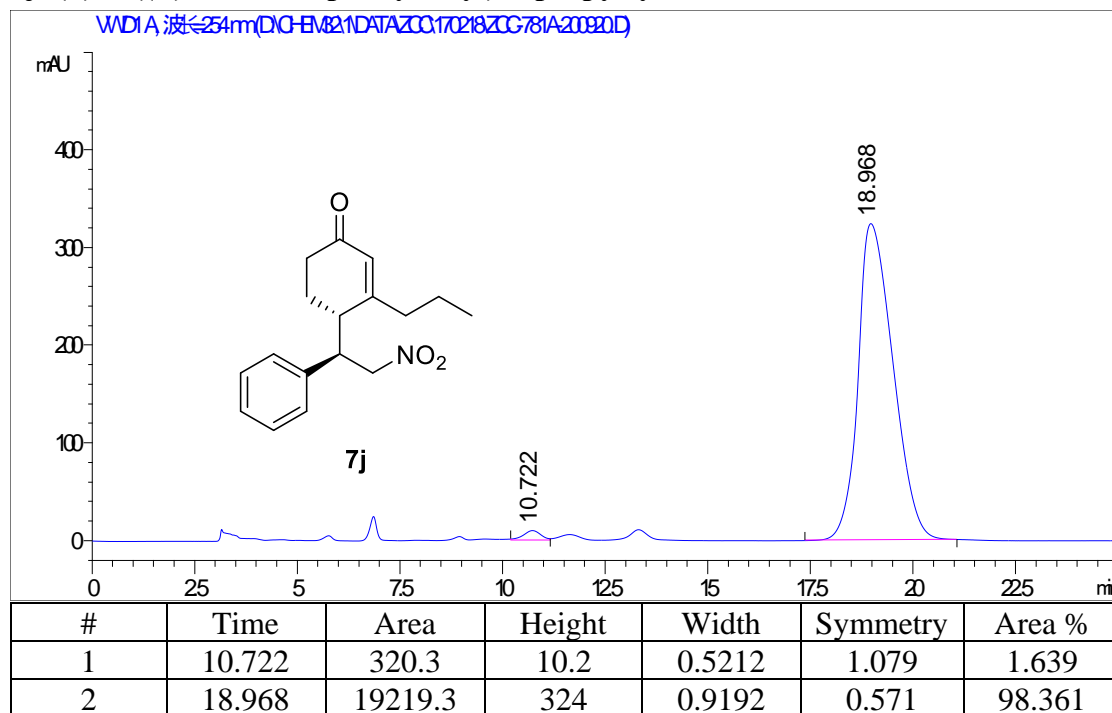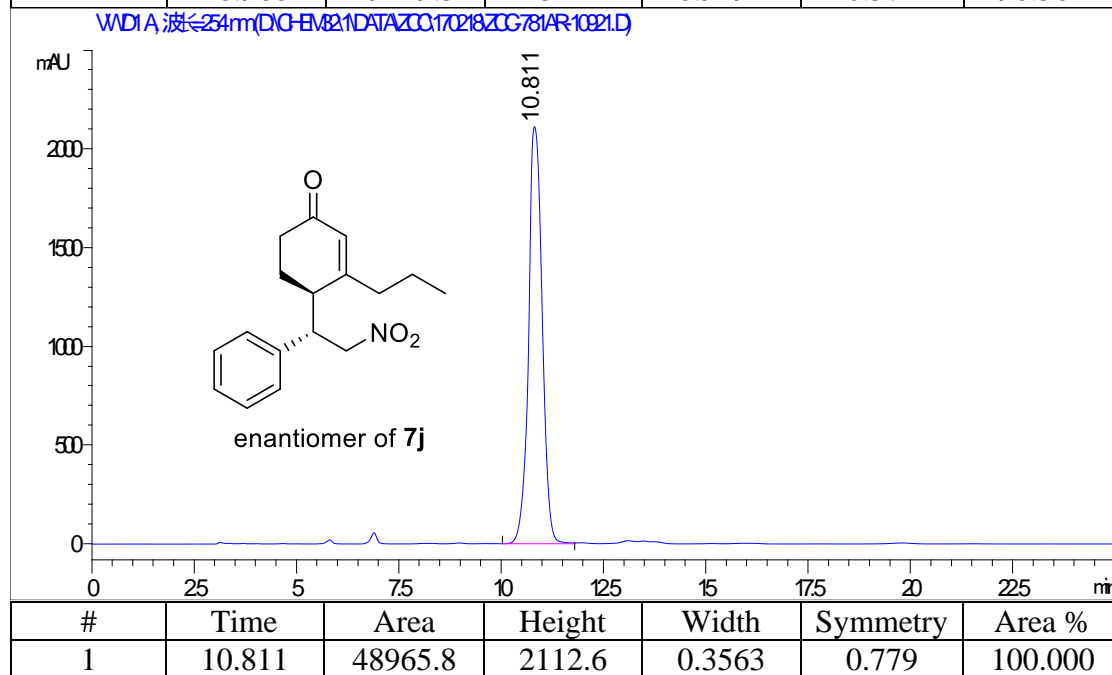

**7k: (S)-3-butyl-4-((R)-2-nitro-1-phenylethyl)cyclohex-2-en-1-one**

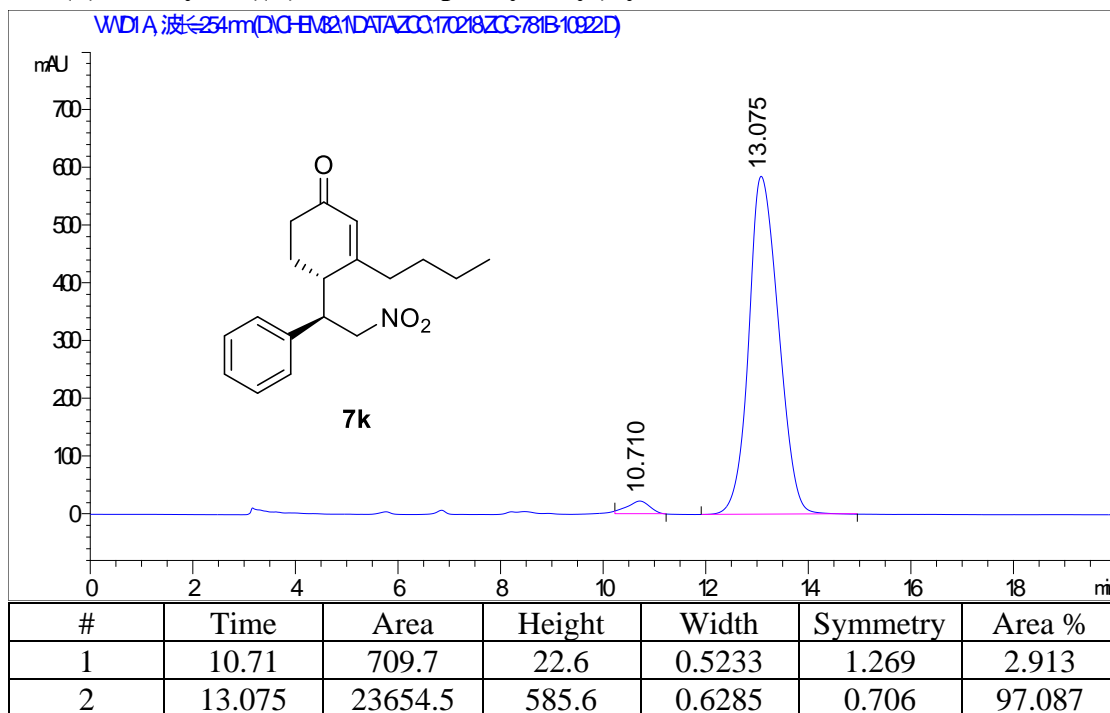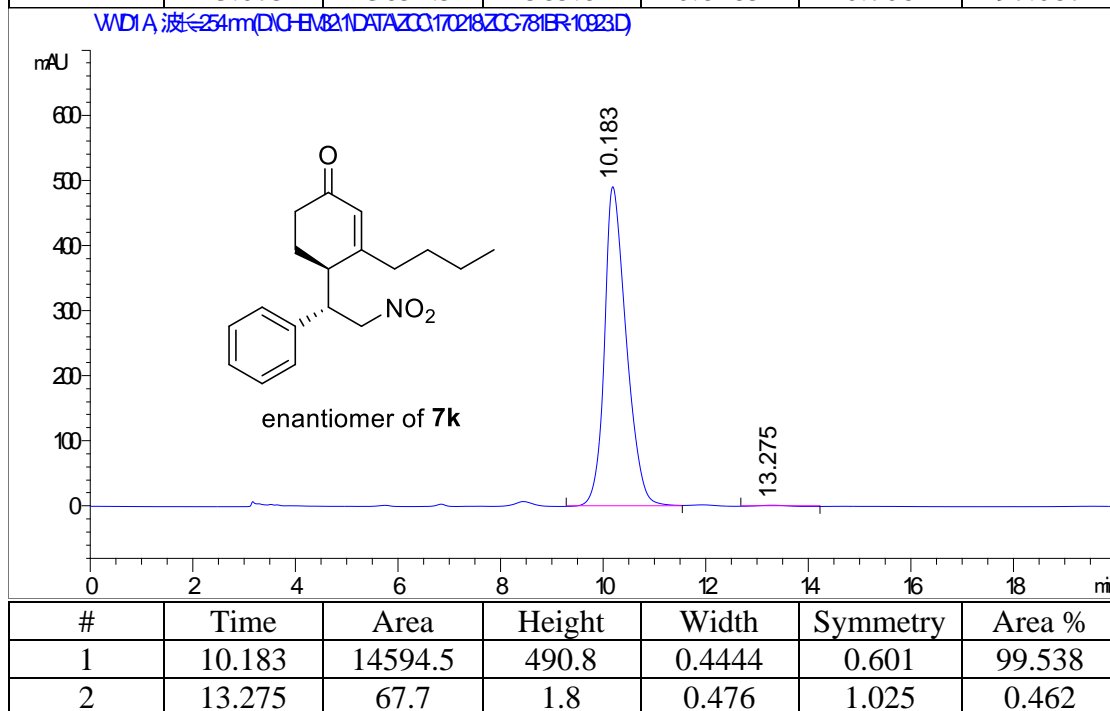

**71: (S)-4-((R)-2-nitro-1-phenylethyl)-3-pentylcyclohex-2-en-1-one**

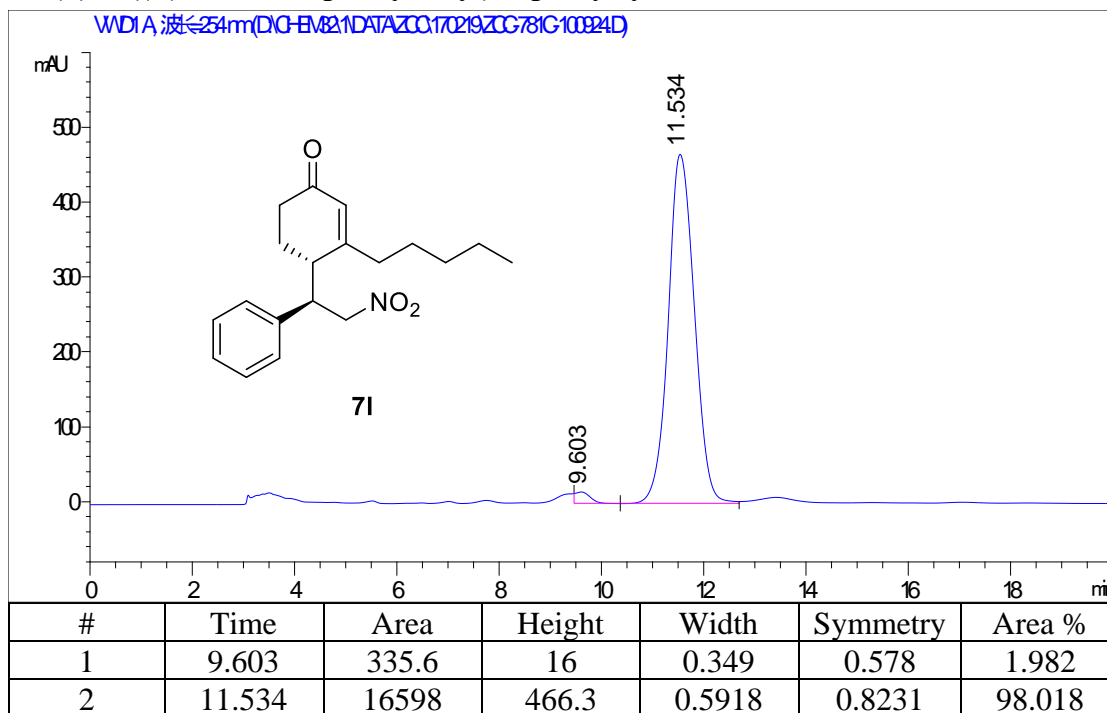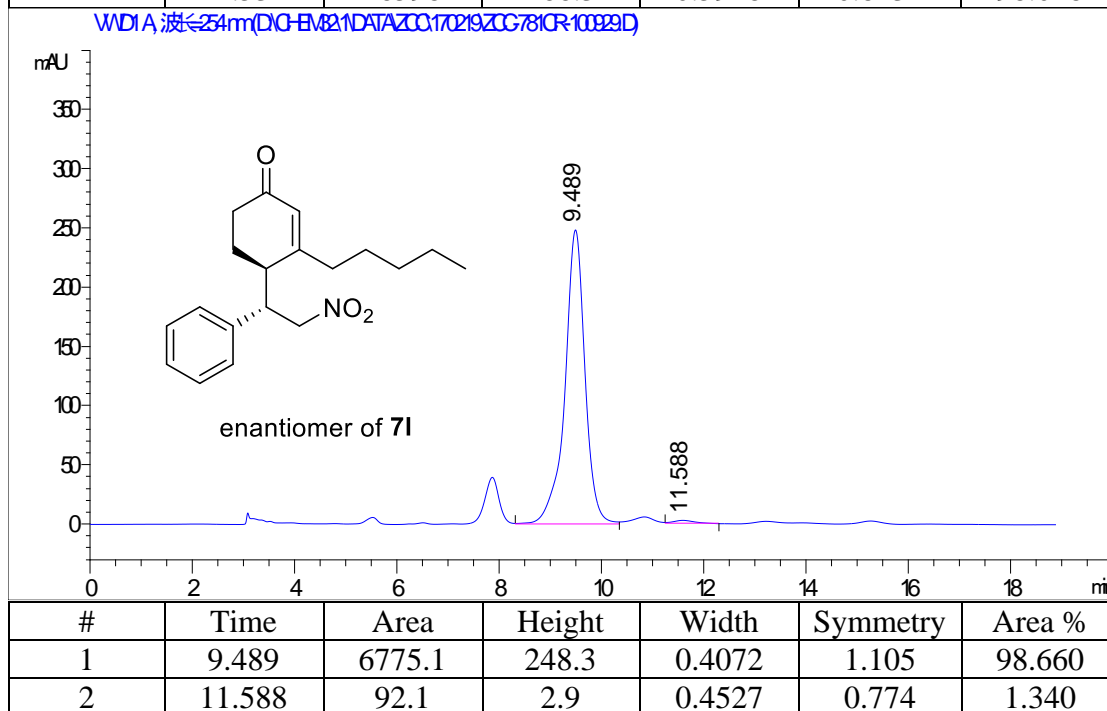



**7m: (S)-3-hexyl-4-((R)-2-nitro-1-phenylethyl)cyclohex-2-en-1-one**

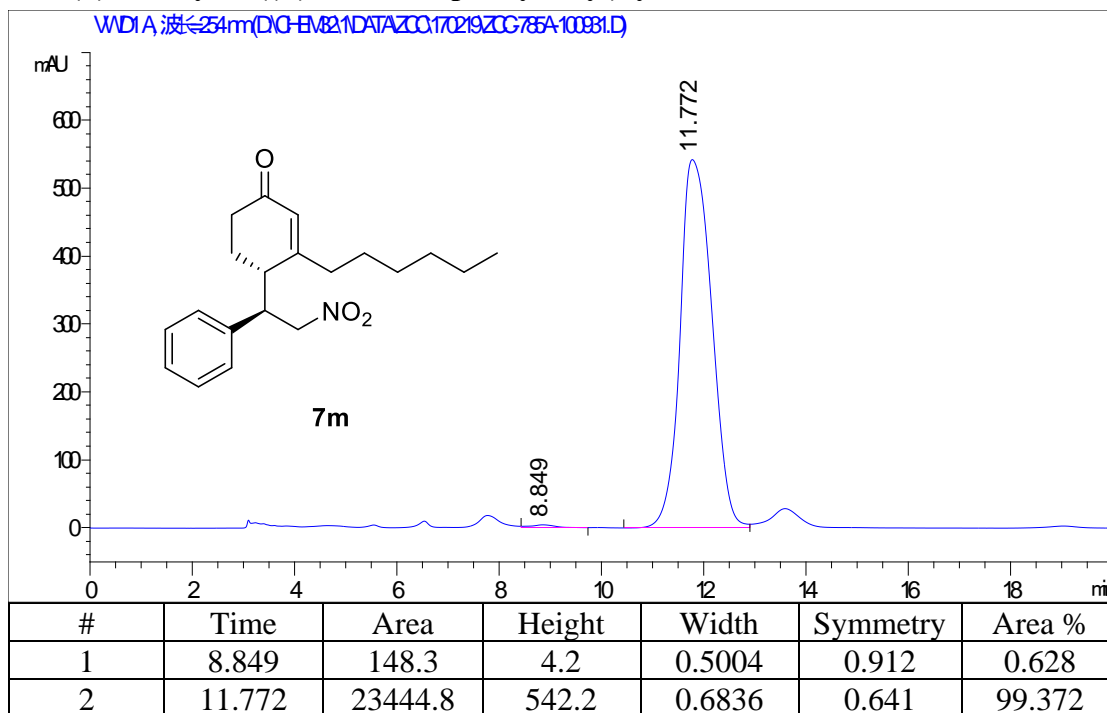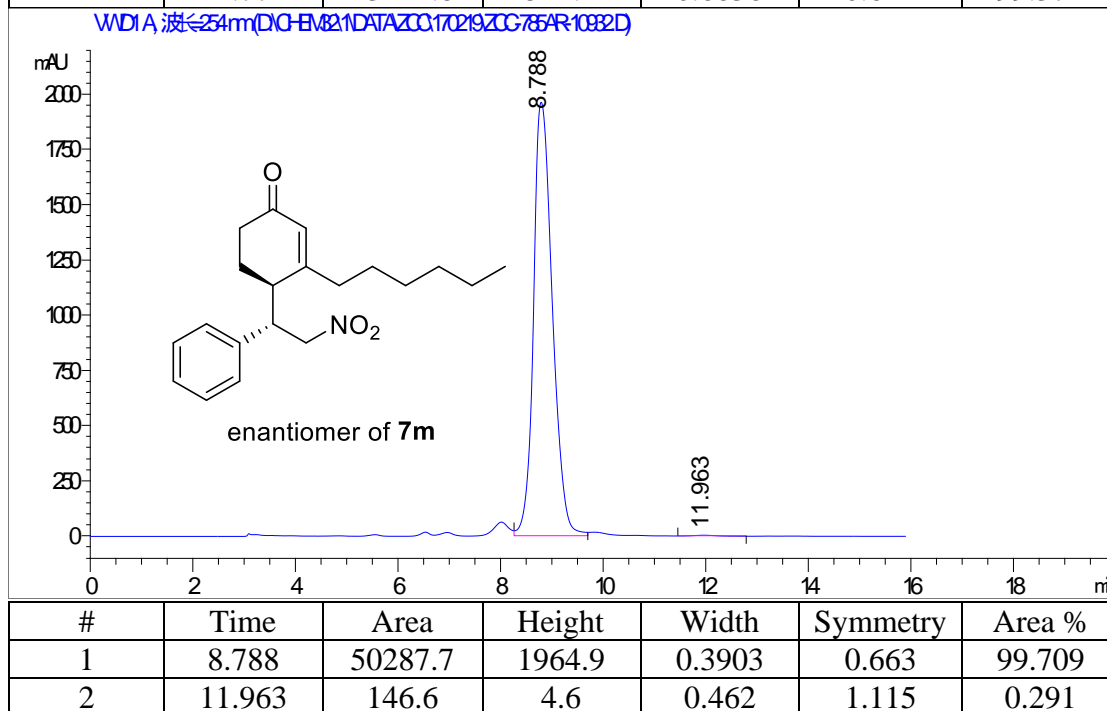

**7n: (S)-3-benzyl-4-((R)-2-nitro-1-phenylethyl)cyclohex-2-en-1-one**

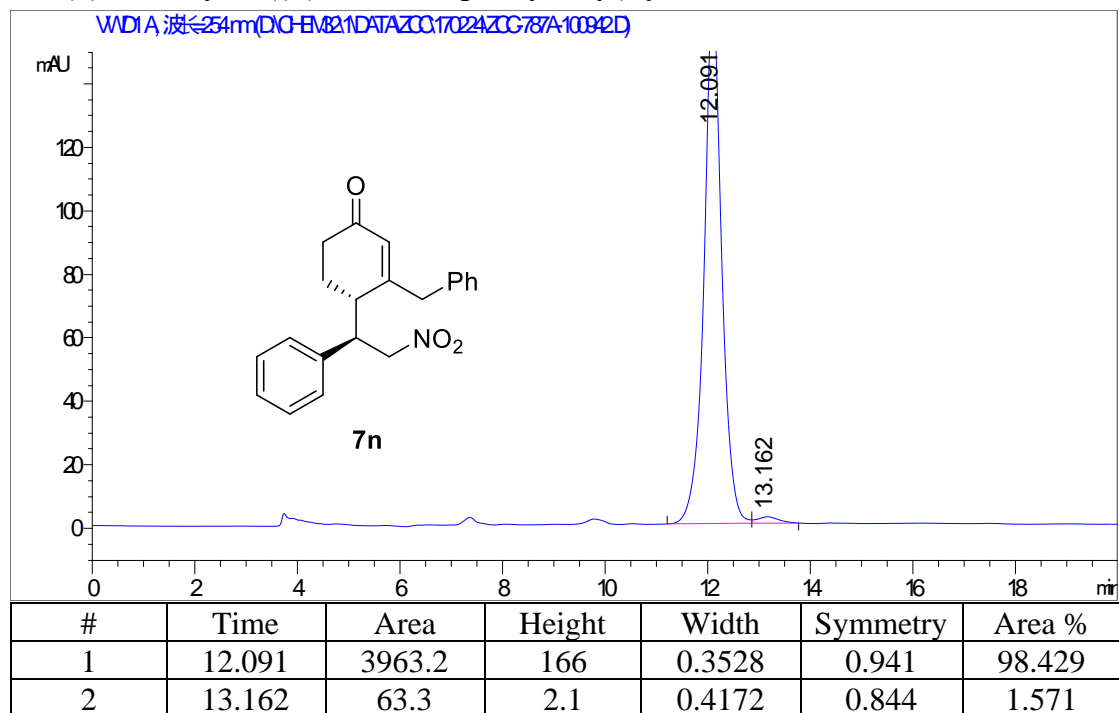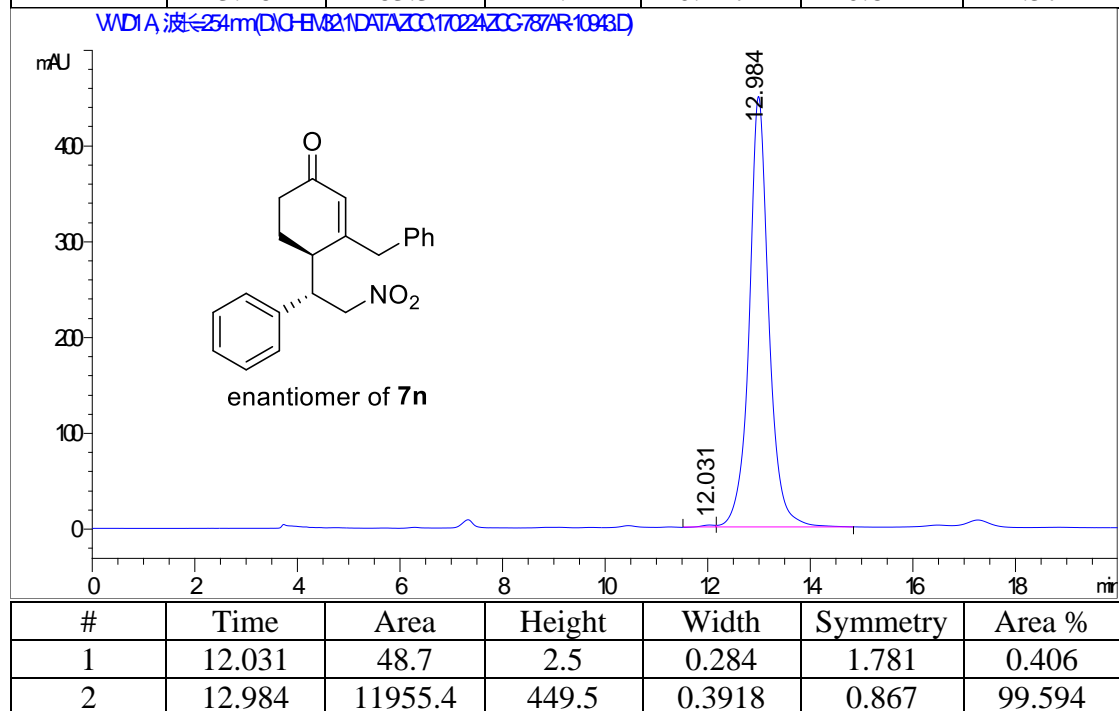

**7o: (S)-4-((R)-2-nitro-1-phenylethyl)-3-phenethylcyclohex-2-en-1-one**

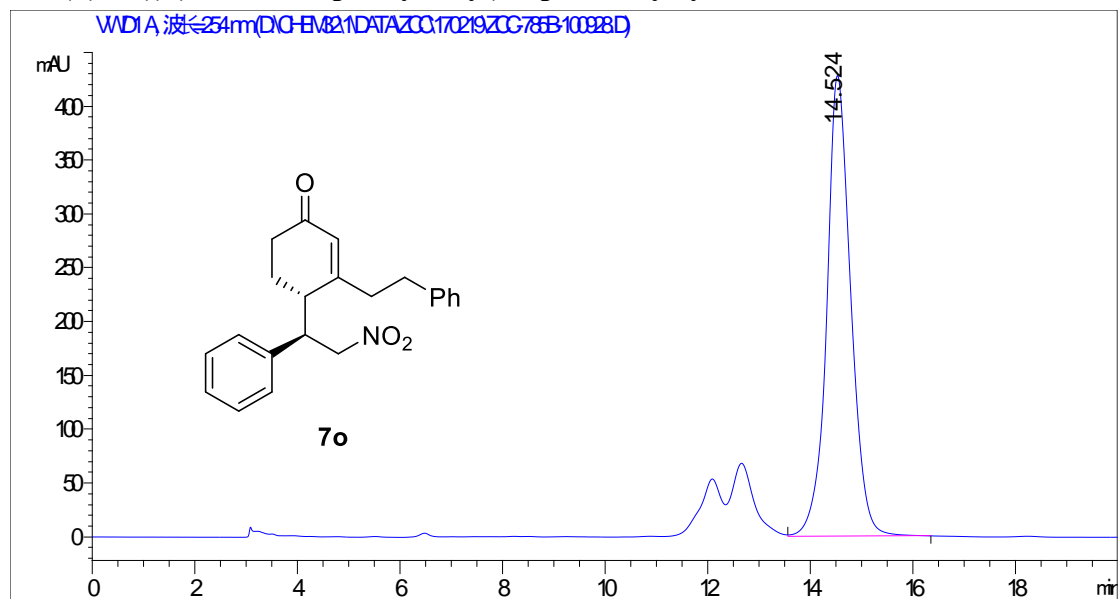

| # | Time   | Area    | Height | Width  | Symmetry | Area %  |
|---|--------|---------|--------|--------|----------|---------|
| 1 | 14.524 | 13930.6 | 428    | 0.4874 | 0.801    | 100.000 |

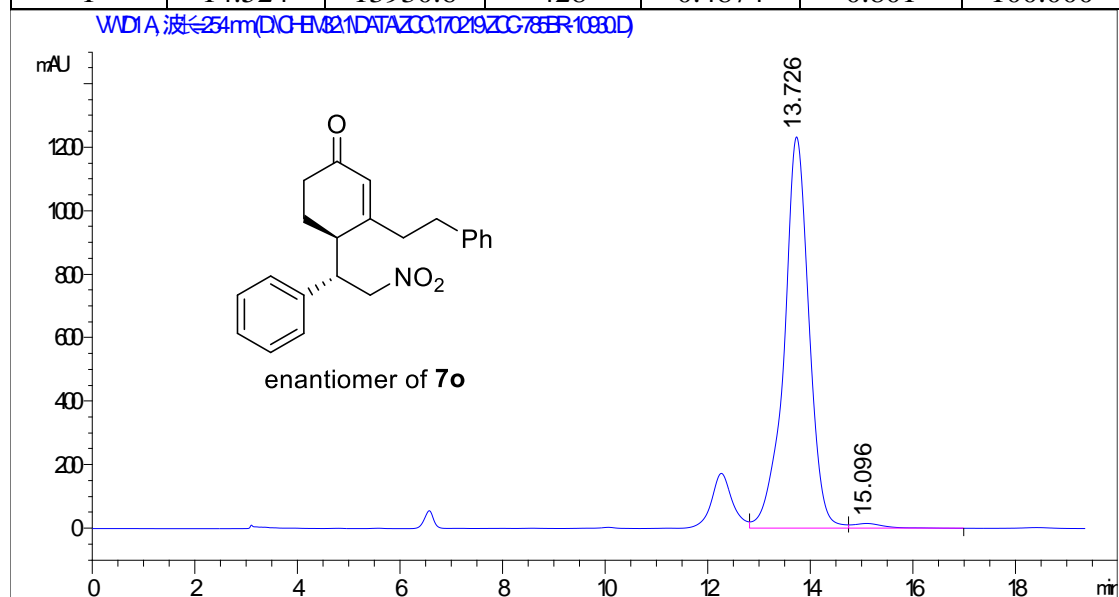

| # | Time   | Area    | Height | Width  | Symmetry | Area % |
|---|--------|---------|--------|--------|----------|--------|
| 1 | 13.726 | 41541.2 | 1233   | 0.5023 | 1.002    | 98.419 |
| 2 | 15.096 | 667.3   | 15.4   | 0.6011 | 0.667    | 1.581  |

**7p: (S)-4-((R)-1-(4-bromophenyl)-2-nitroethyl)-3-butylcyclohex-2-en-1-one**

WDIA; 波長=254nm(DIG-EM81\DATA\00170223\ZC78\B-10086.D)

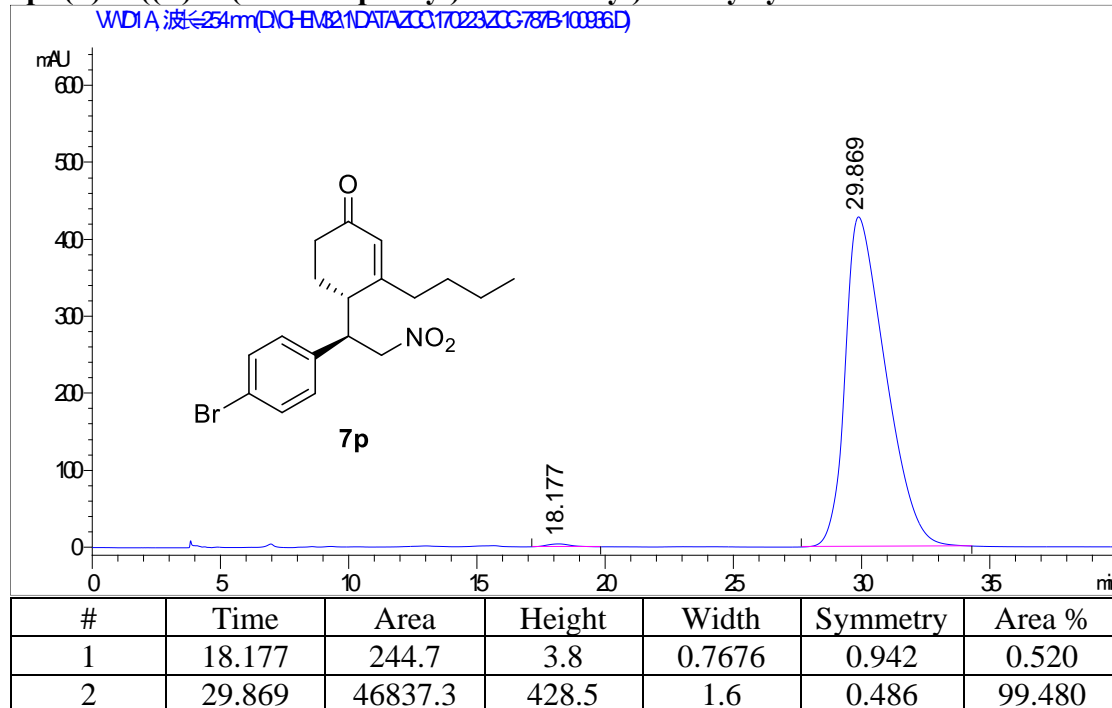

WDIA; 波長=254nm(DIG-EM81\DATA\00170223\ZC78\B-10387.D)

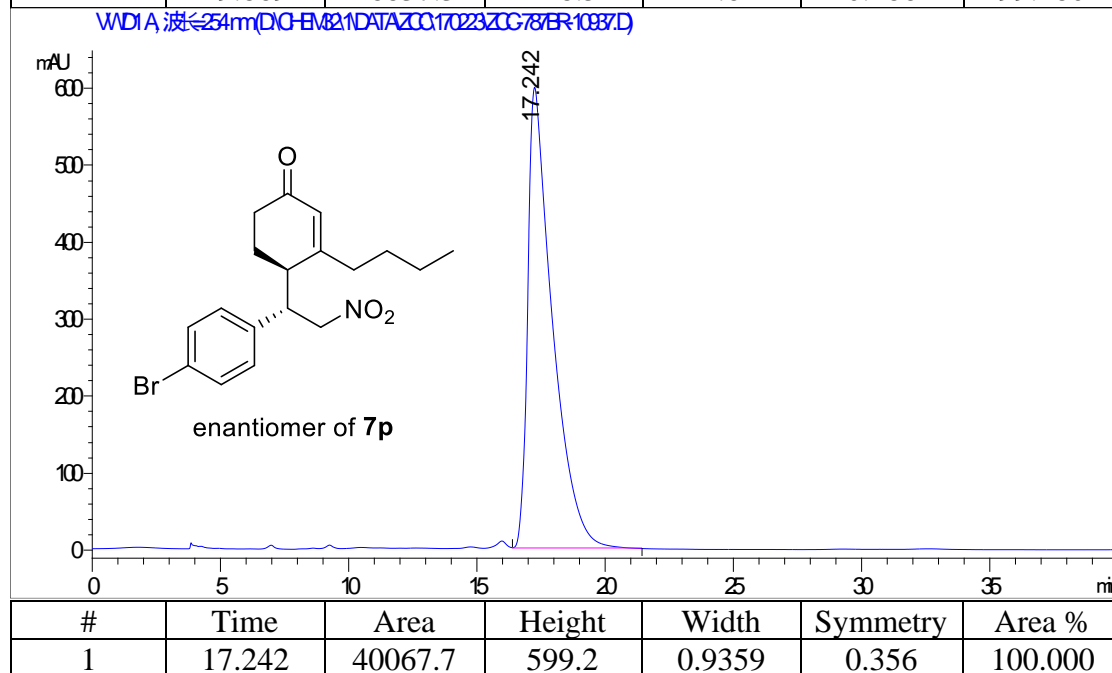

7q: (S)-6-((R)-2-nitro-1-phenylethyl)-5,6-dihydro-[1,1'-biphenyl]-3(4H)-one

WDA, Verh. 5:1 (CHCC0924ZG10082)

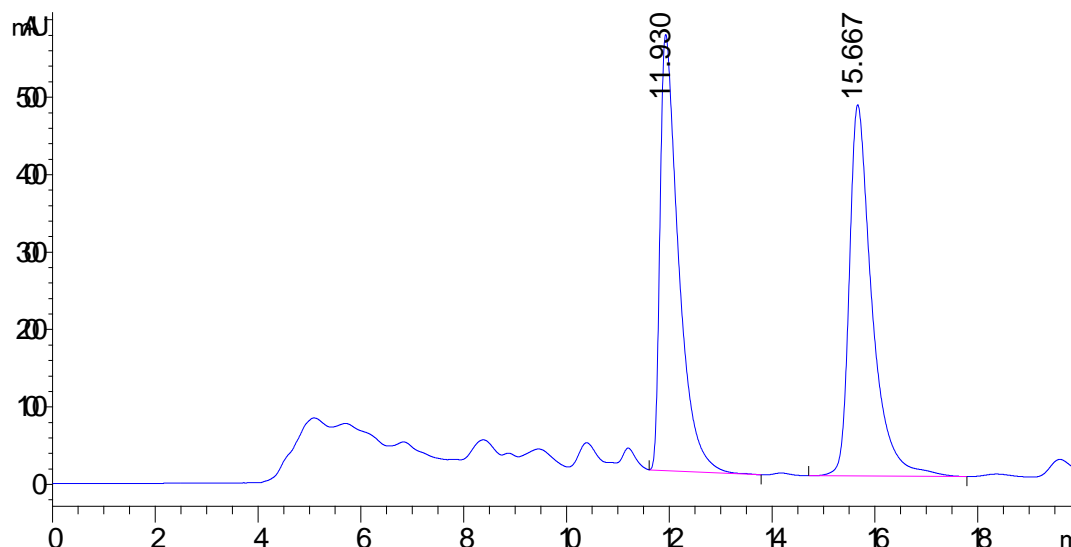

| # | Time   | Area    | Height | Width  | Symmetry | Area % |
|---|--------|---------|--------|--------|----------|--------|
| 1 | 11.93  | 14121.5 | 563.2  | 0.3698 | 0.4      | 48.979 |
| 2 | 15.667 | 14710.3 | 479.5  | 0.4527 | 0.549    | 51.021 |

WDA, Verh. 5:1 (CHCC0924ZG10083)

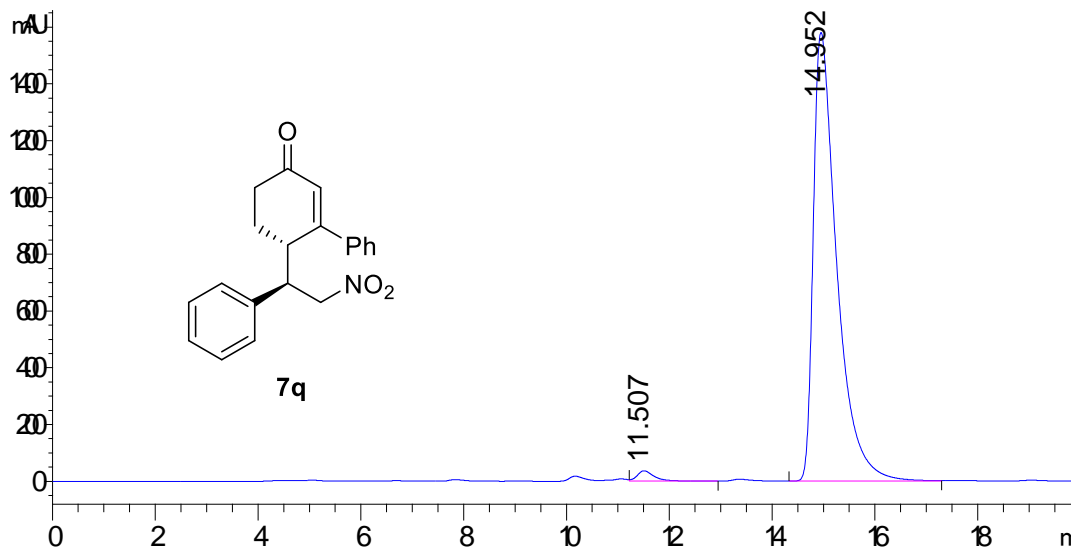

| # | Time   | Area    | Height | Width  | Symmetry | Area % |
|---|--------|---------|--------|--------|----------|--------|
| 1 | 11.507 | 855.8   | 36.9   | 0.3437 | 0.618    | 1.677  |
| 2 | 14.952 | 50162.1 | 1580.4 | 0.4738 | 0.443    | 98.323 |

**7r: (S)-3',5'-dimethoxy-6-((R)-2-nitro-1-phenylethyl)-5,6-dihydro-[1,1'-biphenyl]-3(4H)-one**

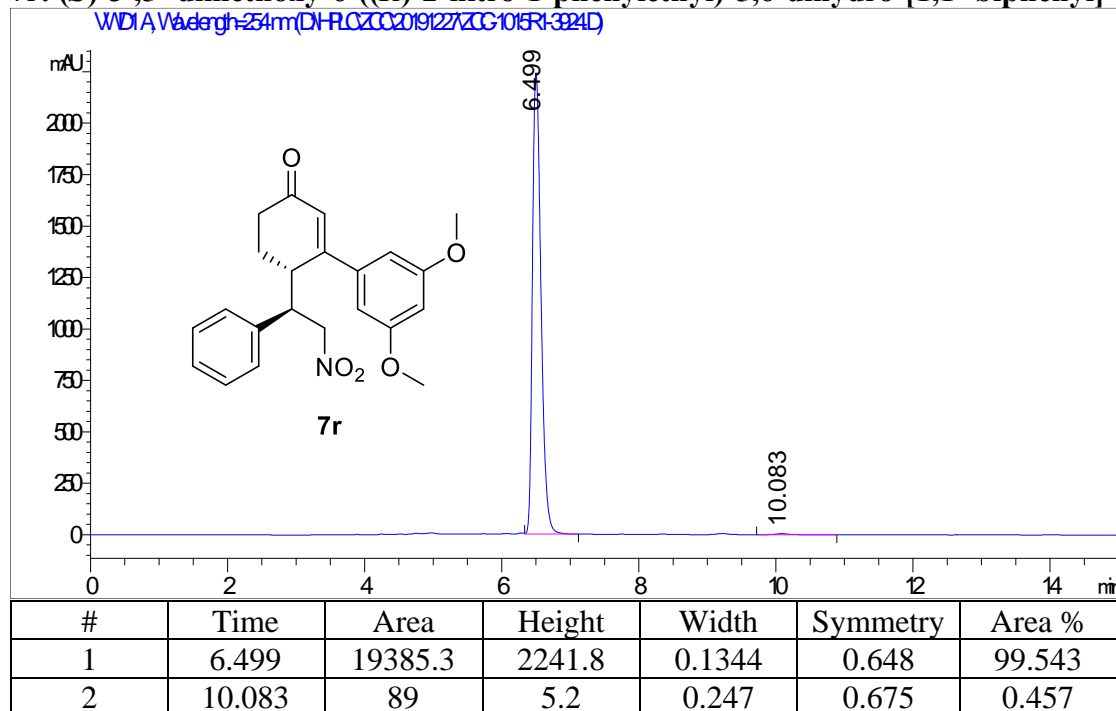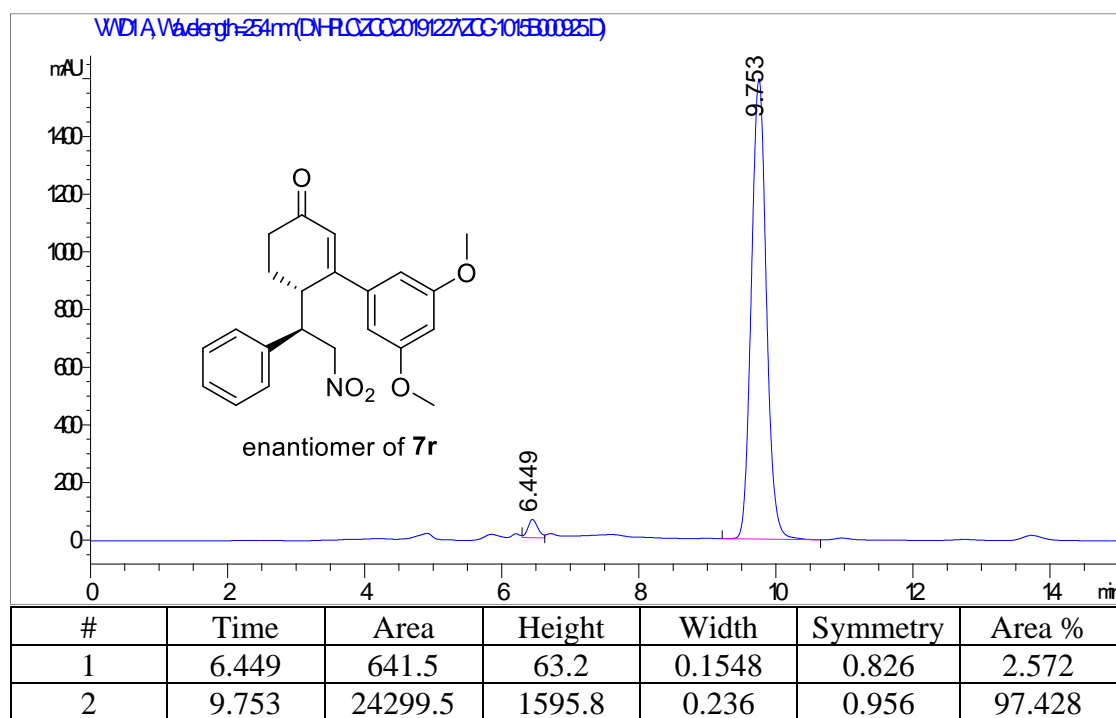

7s: (S)-6-((R)-2-nitro-1-phenylethyl)-3',5'-bis(trifluoromethyl)-5,6-dihydro-[1,1'-biphenyl]-3(4H)-one

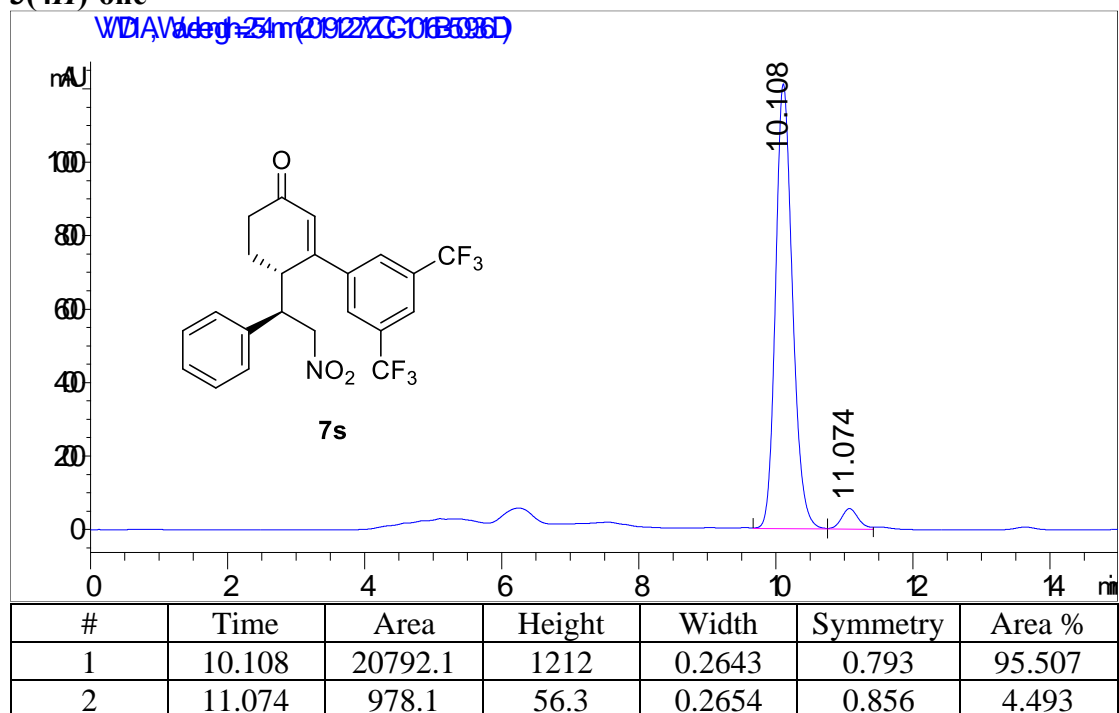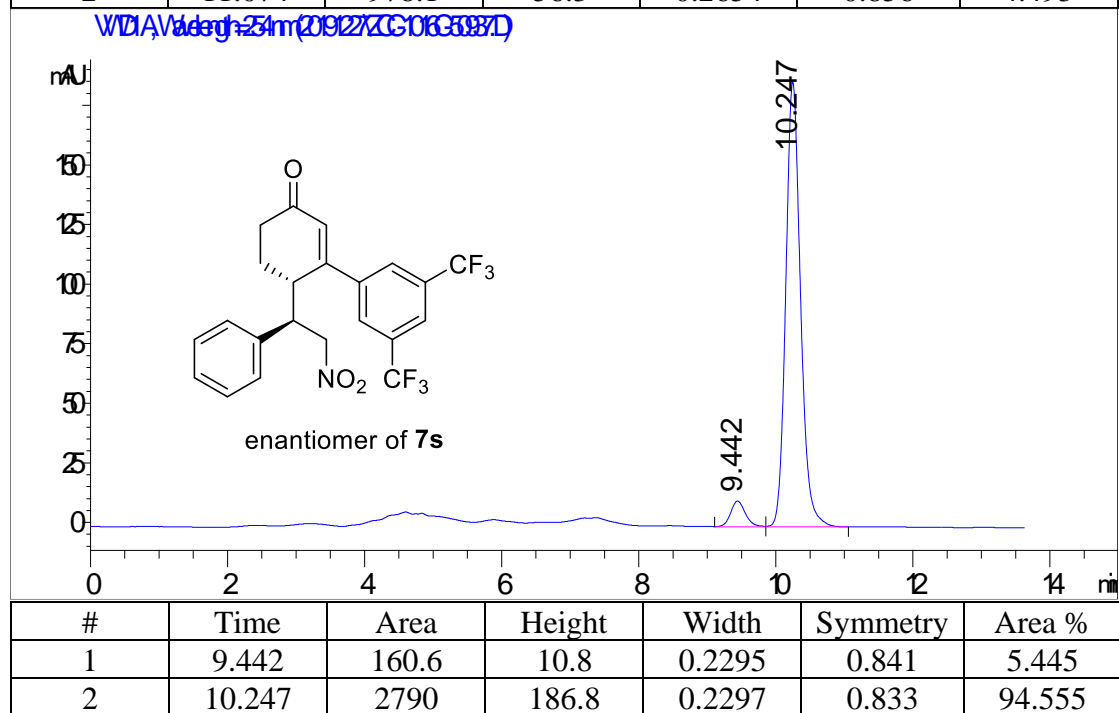

7t: (S)-6-((R)-1-(4-bromophenyl)-2-nitroethyl)-5,6-dihydro-[1,1'-biphenyl]-3(4H)-one

WDIA, Wavelength=254nm(D:\R020019123\ZC1010889D)

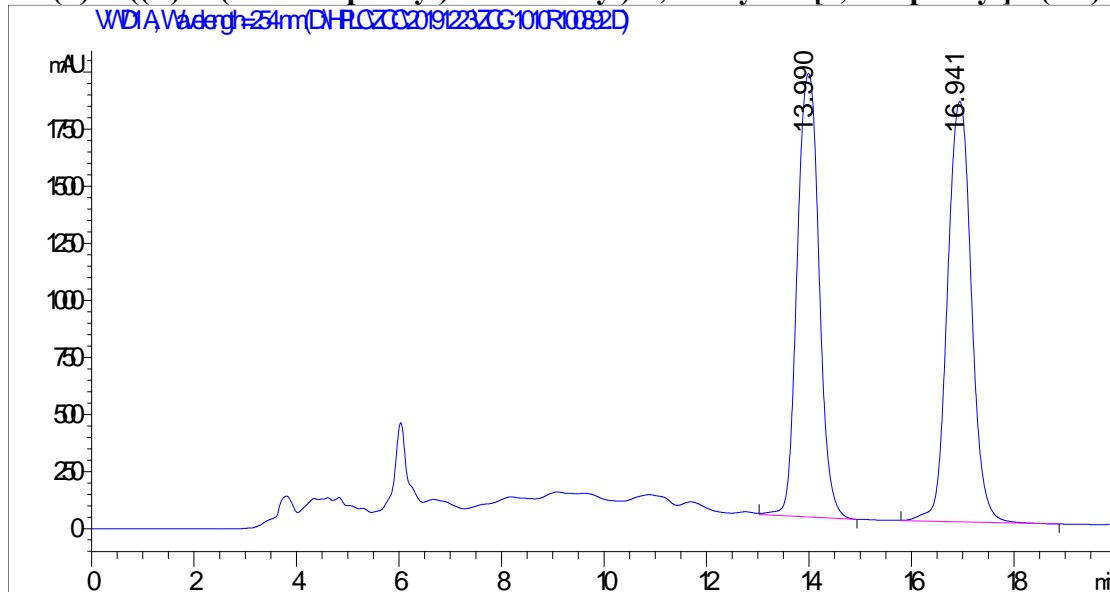

| # | Time   | Area    | Height | Width  | Symmetry | Area % |
|---|--------|---------|--------|--------|----------|--------|
| 1 | 13.99  | 57537.4 | 1943.4 | 0.4722 | 1.01     | 49.074 |
| 2 | 16.941 | 59709.3 | 1841.9 | 0.5138 | 0.997    | 50.926 |

WDIA, Wavelength=254nm(D:\R020019123\ZC1010889D)

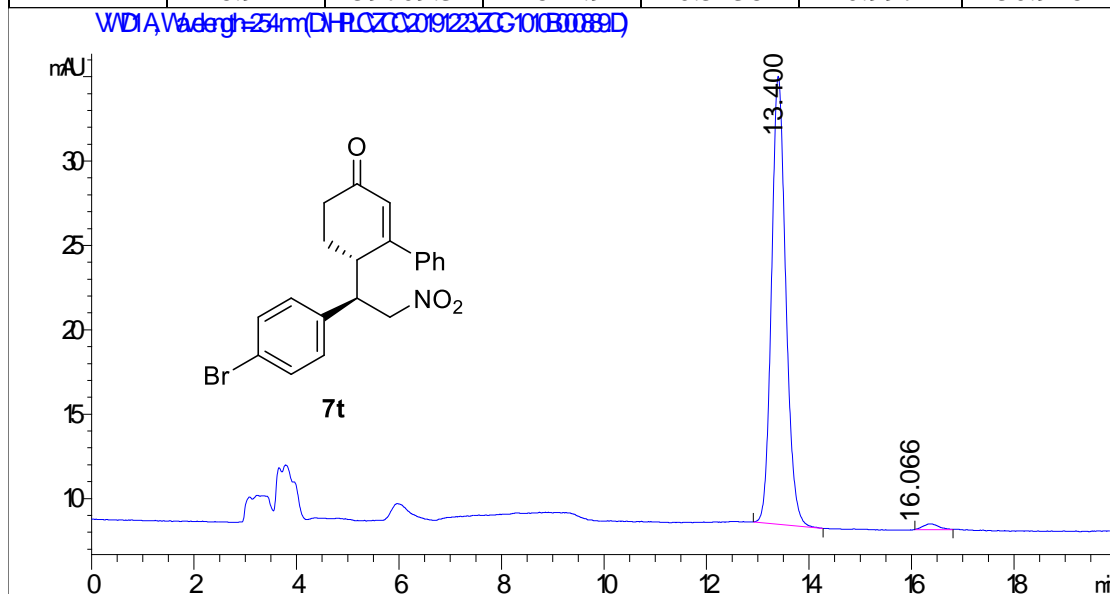

| # | Time   | Area  | Height | Width  | Symmetry | Area % |
|---|--------|-------|--------|--------|----------|--------|
| 1 | 13.4   | 513.6 | 26.5   | 0.2957 | 0.837    | 98.623 |
| 2 | 16.066 | 7.2   | 4.7E-3 | 0.3495 | 1.063    | 1.377  |



**7u: (S)-4-((R)-2-nitro-1-phenylethyl)-3-(phenylethynyl)cyclohex-2-en-1-one**

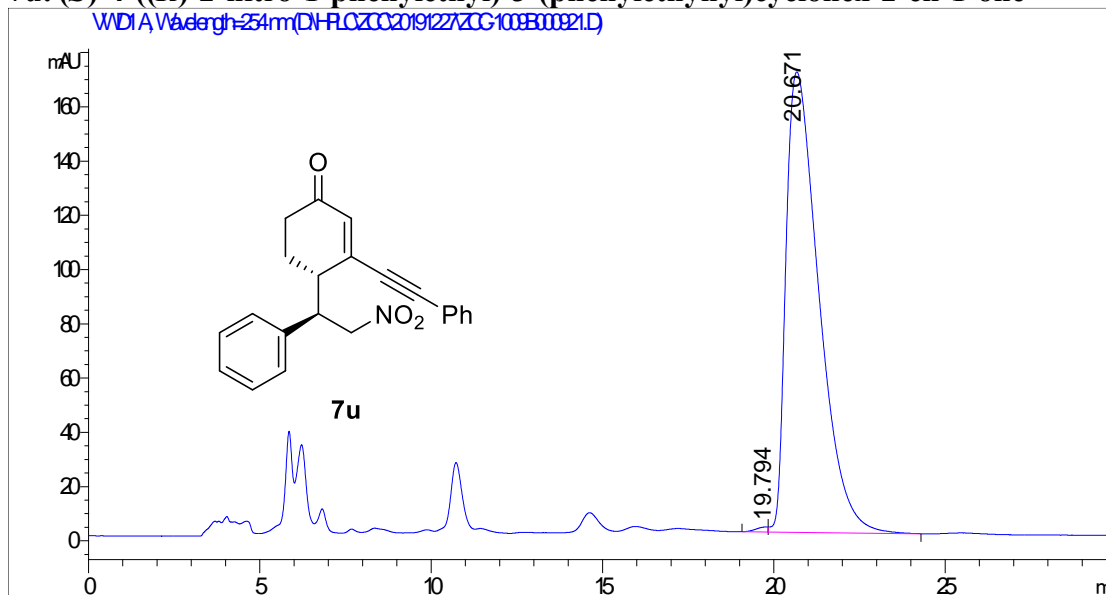

| # | Time   | Area    | Height | Width  | Symmetry | Area % |
|---|--------|---------|--------|--------|----------|--------|
| 1 | 19.794 | 44.4    | 1.9    | 0.2812 | 8.949    | 0.391  |
| 2 | 20.671 | 11305.4 | 169.8  | 1.0028 | 0.455    | 99.609 |

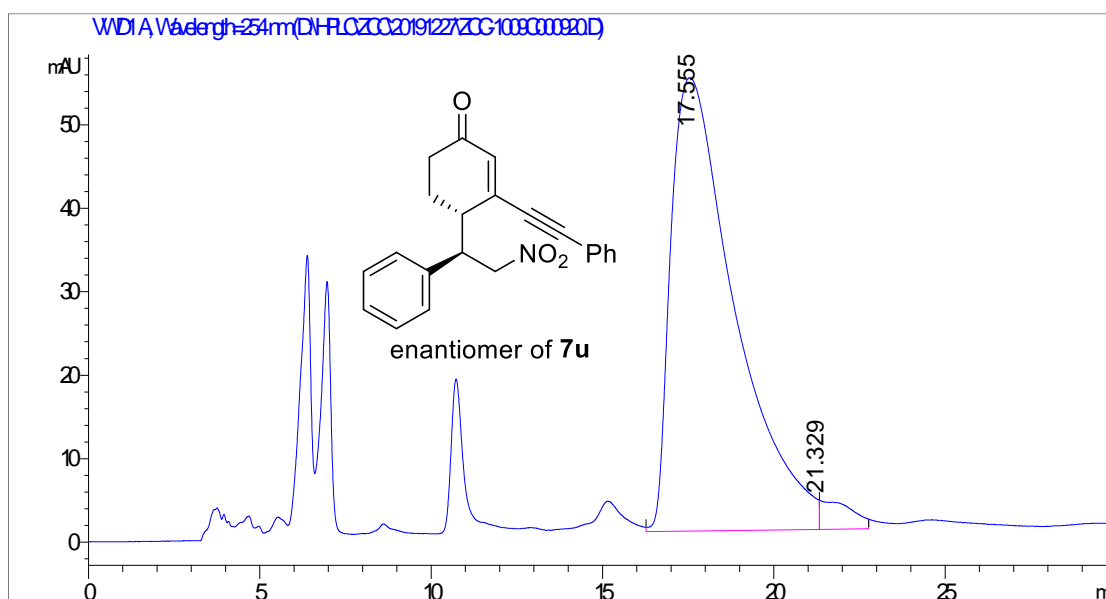

| # | Time   | Area   | Height | Width  | Symmetry | Area % |
|---|--------|--------|--------|--------|----------|--------|
| 1 | 17.555 | 7043.1 | 54.3   | 2.1601 | 0.413    | 96.951 |
| 2 | 21.329 | 221.5  | 3.5    | 1.058  | 0        | 3.049  |

**10: 2-((1S,2R)-2-(3-oxocyclohex-1-en-1-yl)-1-phenylpropyl)malononitrile**

WDIA, Wavelength=254nm (D:\RCC\2019231\CG107A01004D)

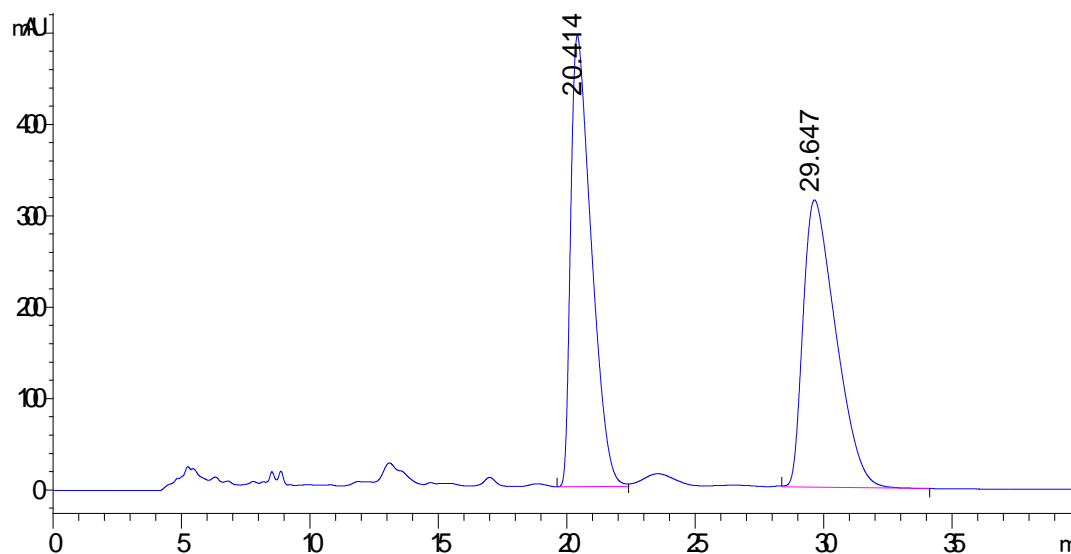

| # | Time   | Area    | Height | Width  | Symmetry | Area % |
|---|--------|---------|--------|--------|----------|--------|
| 1 | 20.414 | 27558.1 | 493.7  | 0.8335 | 0.442    | 49.719 |
| 2 | 29.647 | 27869.6 | 314.5  | 1.2889 | 0.502    | 50.281 |

WDIA, Wavelength=254nm (D:\RCC\2019231\CG107A01002D)

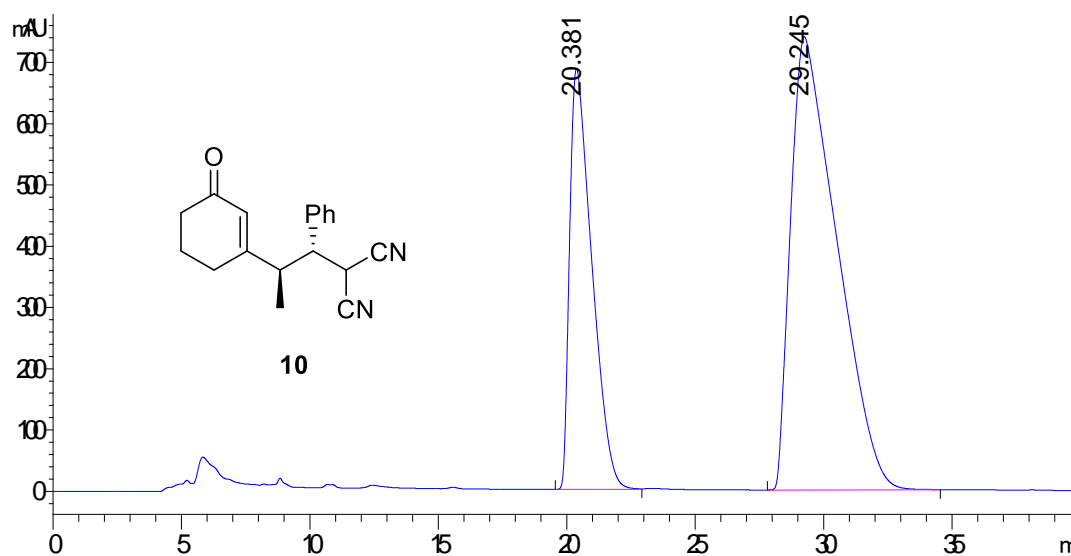

| # | Time   | Area    | Height | Width  | Symmetry | Area % |
|---|--------|---------|--------|--------|----------|--------|
| 1 | 20.381 | 41314.7 | 686.9  | 0.9058 | 0.418    | 30.971 |
| 2 | 29.245 | 92081.2 | 739.9  | 1.7319 | 0.395    | 69.029 |

**11: 2-((1S,2S)-2-(3-oxocyclohex-1-en-1-yl)-1-phenylpropyl)malononitrile**

WDIA, Wavelength=254nm (D:\R000002019231\ZG1017\B01001D)

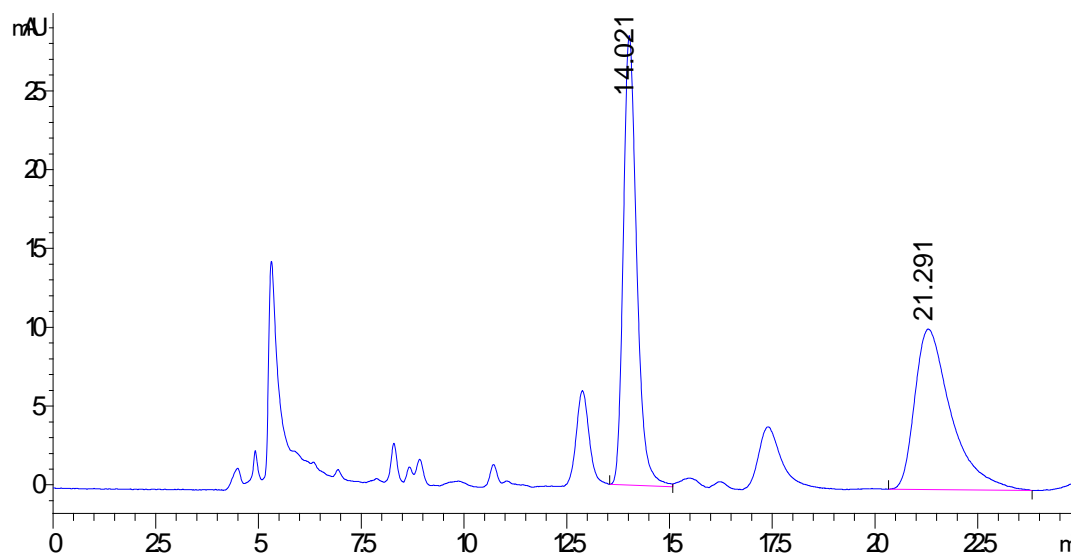

| # | Time   | Area  | Height | Width  | Symmetry | Area % |
|---|--------|-------|--------|--------|----------|--------|
| 1 | 14.021 | 647   | 28.5   | 0.3463 | 0.735    | 50.889 |
| 2 | 21.291 | 624.4 | 10.2   | 0.8292 | 0.541    | 49.111 |

WDIA, Wavelength=254nm (D:\R000002019231\ZG1017\B01003D)

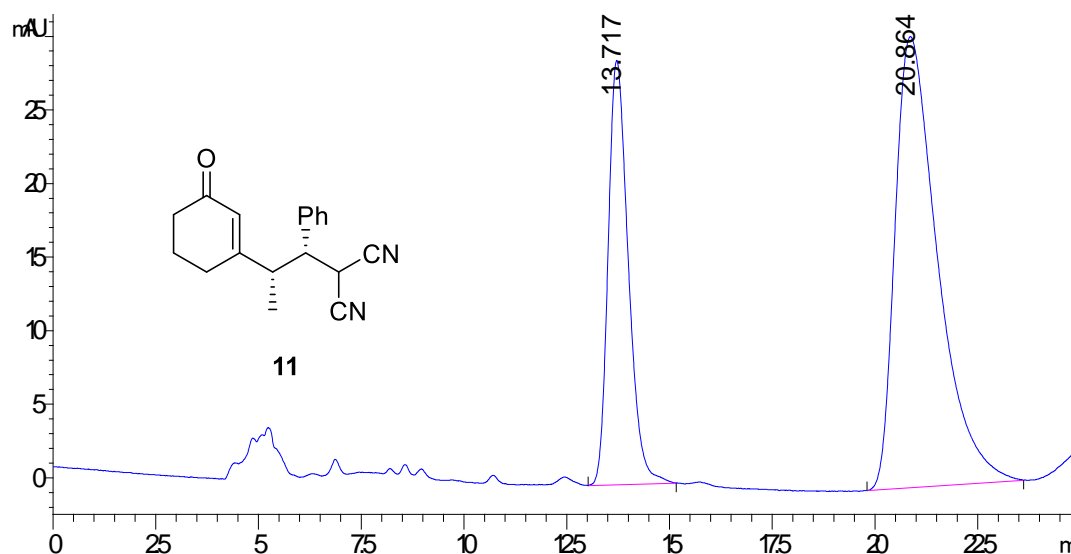

| # | Time   | Area   | Height | Width  | Symmetry | Area % |
|---|--------|--------|--------|--------|----------|--------|
| 1 | 13.717 | 983.6  | 28.8   | 0.5204 | 0.695    | 30.162 |
| 2 | 20.864 | 2277.5 | 30.8   | 1.1791 | 0        | 69.838 |

**12a: (S)-3-((R)-4-oxo-2-((E)-styryl)cyclohex-2-en-1-yl)-1-phenylpyrrolidine-2,5-dione**

WVD1A 波长=254nm(DIC-EM821\DATA\ZCC\150128\ZCC-141R-100063D)

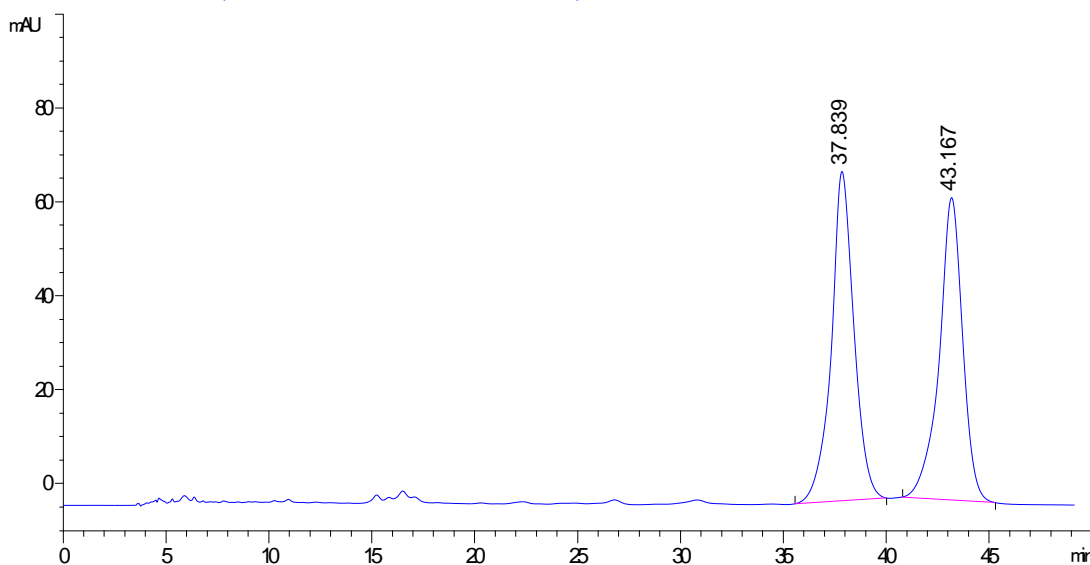

| # | Time   | Area   | Height | Width  | Symmetry | Area % |
|---|--------|--------|--------|--------|----------|--------|
| 1 | 37.839 | 5377.4 | 70.2   | 1.0991 | 0.897    | 51.227 |
| 2 | 43.167 | 5119.8 | 64.5   | 1.1709 | 1.123    | 48.773 |

WVD1A 波长=254nm(DIC-EM821\DATA\ZCC\150128\ZCC-141-100064D)

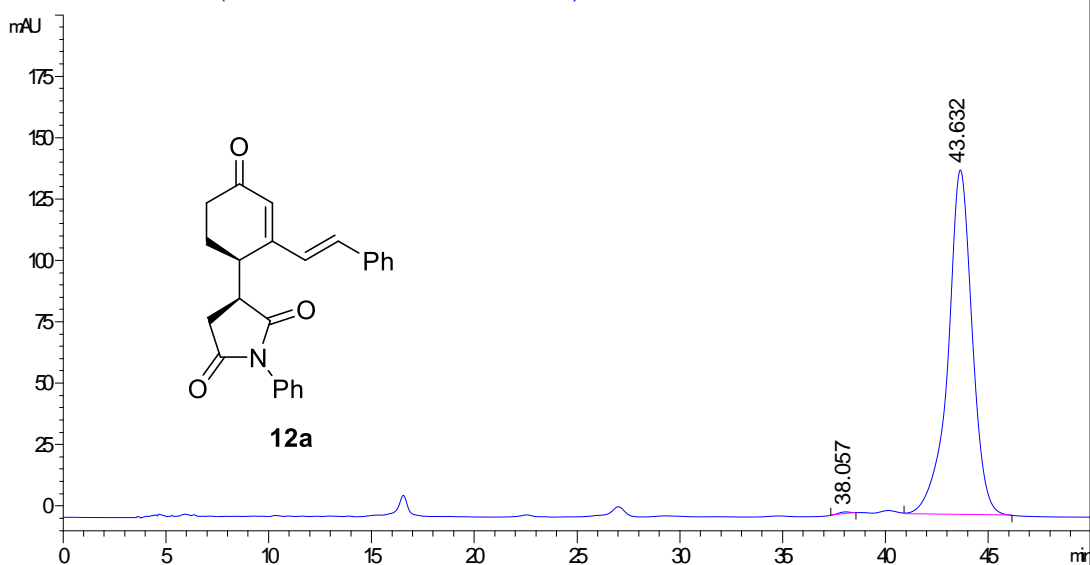

| # | Time   | Area  | Height | Width  | Symmetry | Area % |
|---|--------|-------|--------|--------|----------|--------|
| 1 | 38.057 | 39.3  | 8.8E-1 | 0.7473 | 1.645    | 0.342  |
| 2 | 43.632 | 11473 | 140.4  | 1.2085 | 1.039    | 99.658 |

**12b: (S)-3-((R)-2-((E)-4-chlorostyryl)-4-oxocyclohex-2-en-1-yl)-1-phenylpyrrolidine-2,5-dione**

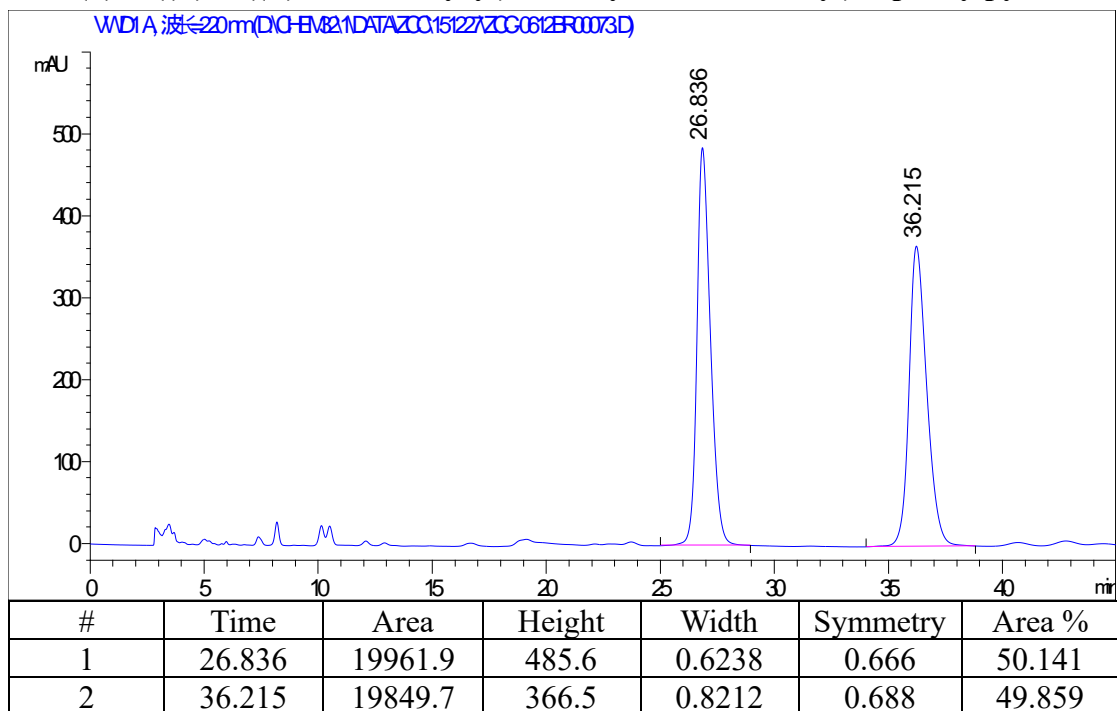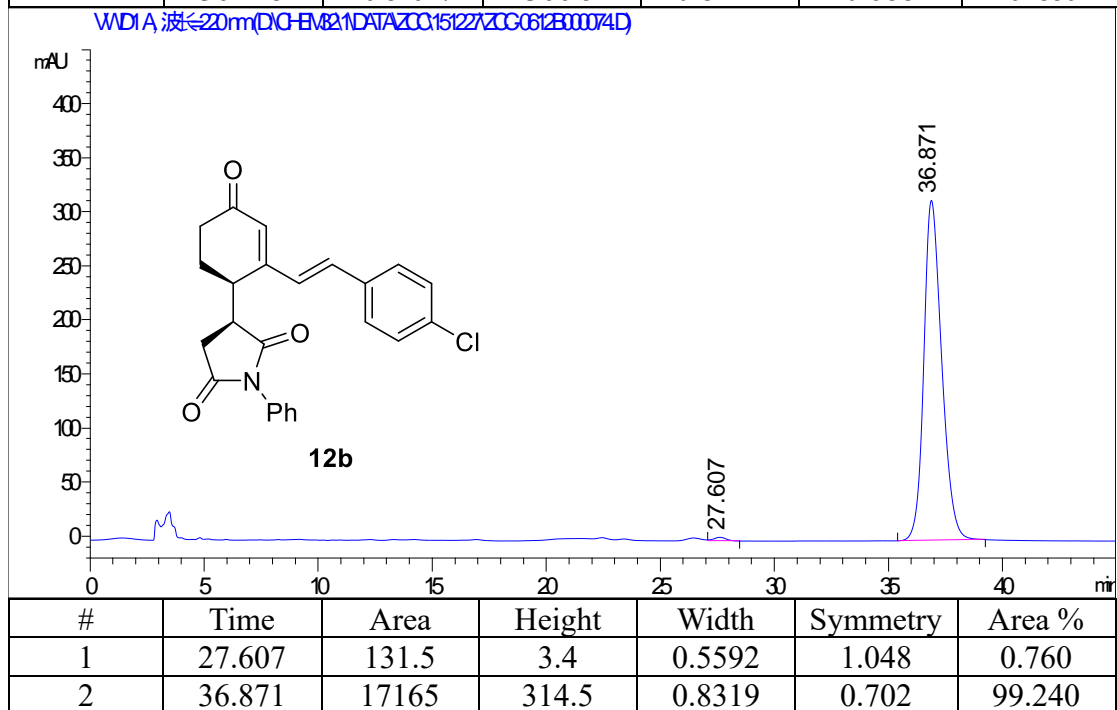

**14: (2R,3R,4R,5R,6S)-5-methyl-3-nitro-8-oxo-2,4-diphenylspiro[5.5]undecane-1,1-dicarbonitrile**

WD1A Wavelength=220nm(DI-FLOZCO20210510YL-157FR302877.D)

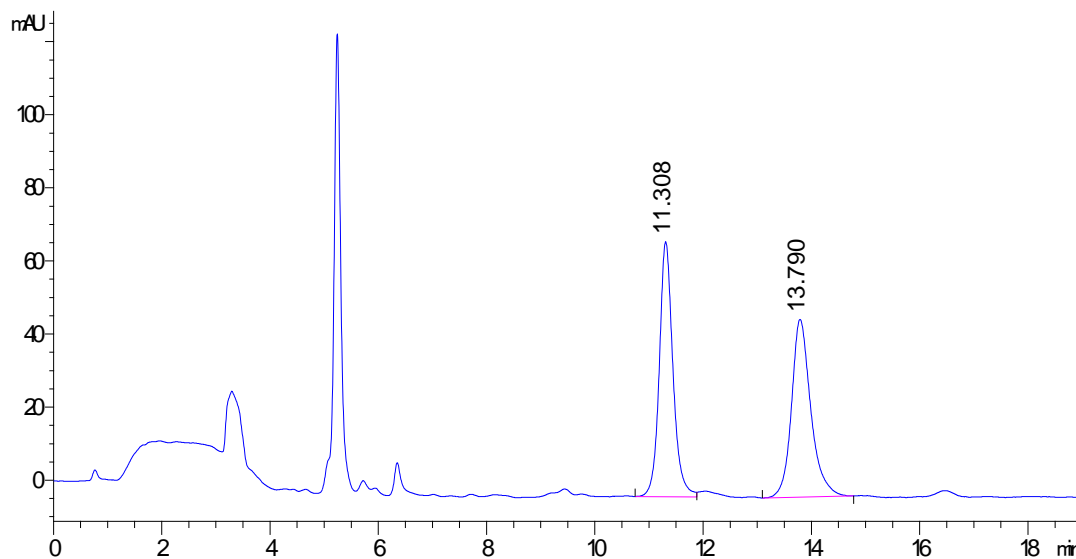

| # | Time   | Area   | Height | Width  | Symmetry | Area % |
|---|--------|--------|--------|--------|----------|--------|
| 1 | 11.308 | 1224   | 69.8   | 0.2658 | 0.83     | 50.388 |
| 2 | 13.79  | 1205.2 | 48.6   | 0.3721 | 0.755    | 49.612 |

WD1A Wavelength=220nm(DI-FLOZCO20210510YL-157F202876.D)

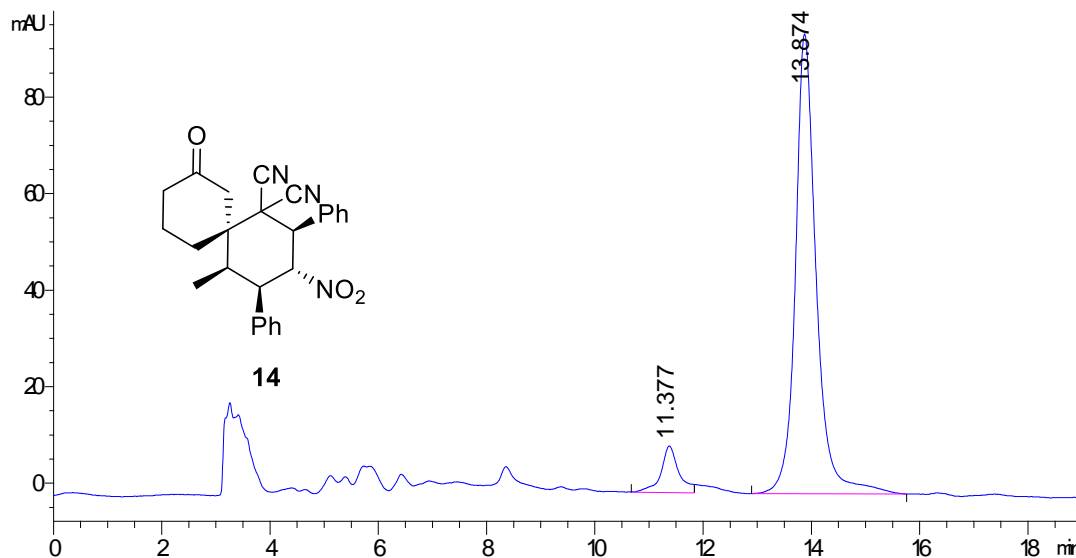

| # | Time   | Area | Height | Width  | Symmetry | Area % |
|---|--------|------|--------|--------|----------|--------|
| 1 | 11.377 | 221  | 9.6    | 0.3299 | 0.89     | 7.974  |
| 2 | 13.874 | 2550 | 95.3   | 0.3967 | 0.736    | 92.026 |

**15: (2R,3R,4R,5S,6R)-5-methyl-3-nitro-8-oxo-2,4-diphenylspiro[5.5]undecane-1,1-dicarbonitrile**

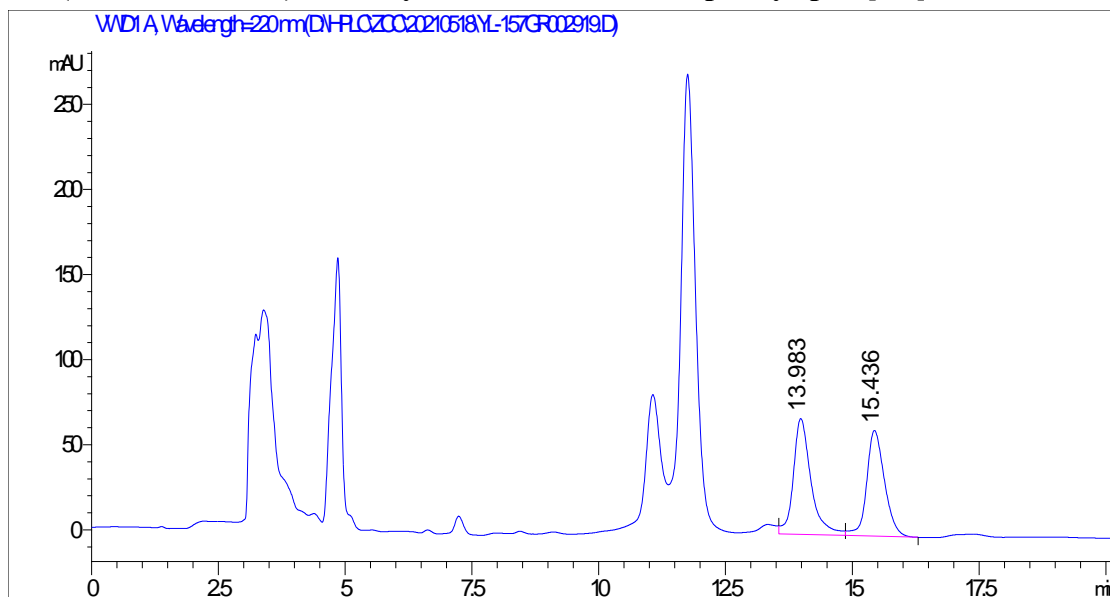

| # | Time   | Area   | Height | Width  | Symmetry | Area % |
|---|--------|--------|--------|--------|----------|--------|
| 1 | 13.983 | 1655.7 | 68.1   | 0.3622 | 0.685    | 52.061 |
| 2 | 15.436 | 1524.7 | 62.2   | 0.3721 | 0.761    | 47.939 |

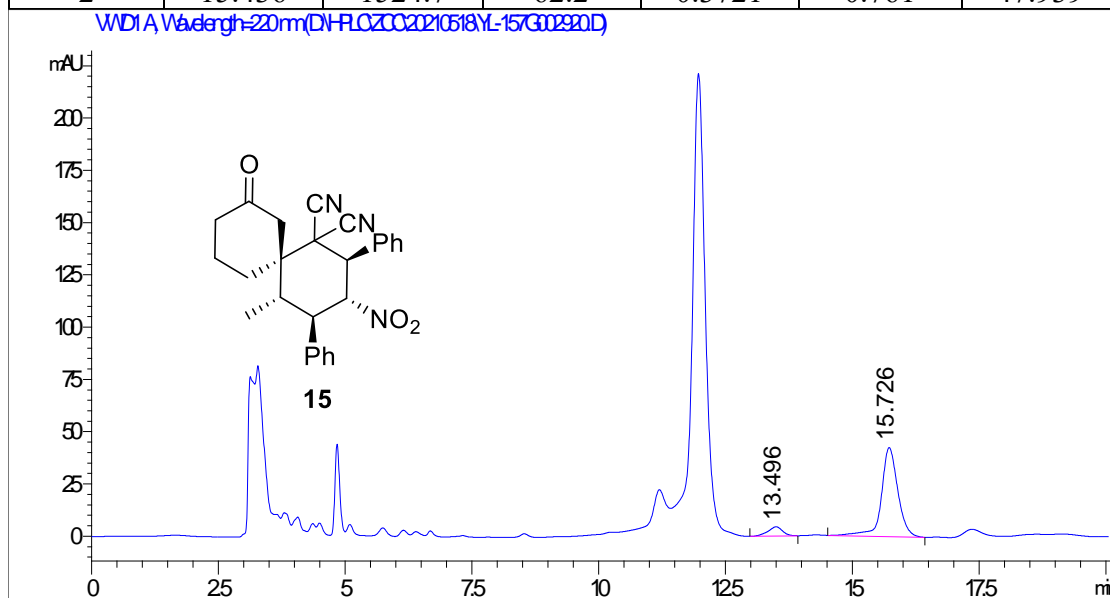

| # | Time   | Area | Height | Width  | Symmetry | Area % |
|---|--------|------|--------|--------|----------|--------|
| 1 | 13.496 | 89.1 | 4.4    | 0.2931 | 1.254    | 8.490  |
| 2 | 15.726 | 960  | 42.5   | 0.3377 | 0.907    | 91.510 |

**16:(2R,3R,4R,4aR,8aR)-8a-ethyl-3-nitro-7-oxo-2,4-diphenyloctahydronaphthalene-1,1(2H)-dicarbonitrile**

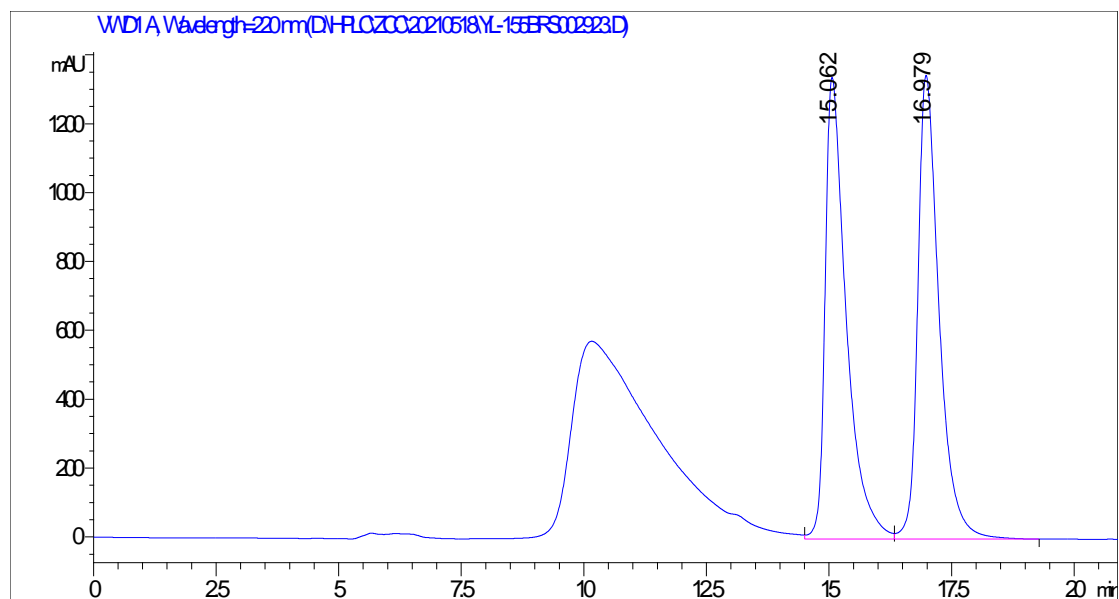

| # | Time   | Area    | Height | Width  | Symmetry | Area % |
|---|--------|---------|--------|--------|----------|--------|
| 1 | 15.062 | 40246.7 | 1340.2 | 0.4437 | 0.456    | 49.703 |
| 2 | 16.979 | 40728.1 | 1346.9 | 0.4548 | 0.594    | 50.297 |

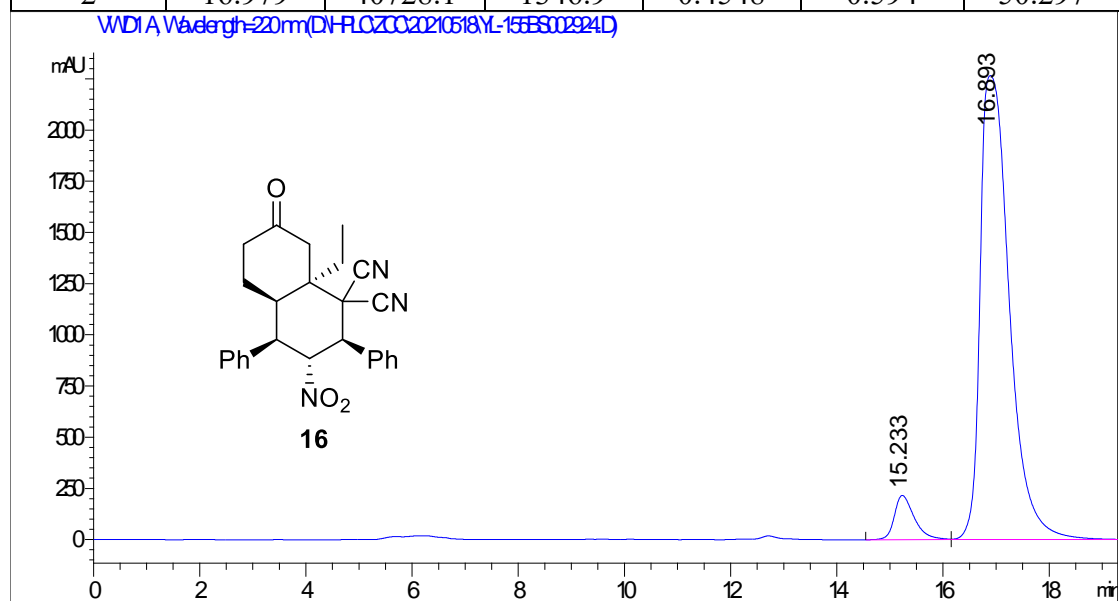

| # | Time   | Area    | Height | Width  | Symmetry | Area % |
|---|--------|---------|--------|--------|----------|--------|
| 1 | 15.233 | 5641.9  | 216.6  | 0.3928 | 0.625    | 6.126  |
| 2 | 16.893 | 86461.2 | 2265.4 | 0.5881 | 0.506    | 93.874 |



**17: (2R,3R,4R,4aS,8aS)-8a-ethyl-3-nitro-7-oxo-2,4-diphenyloctahydronaphthalene-1,1(2H)-dicarbonitrile**

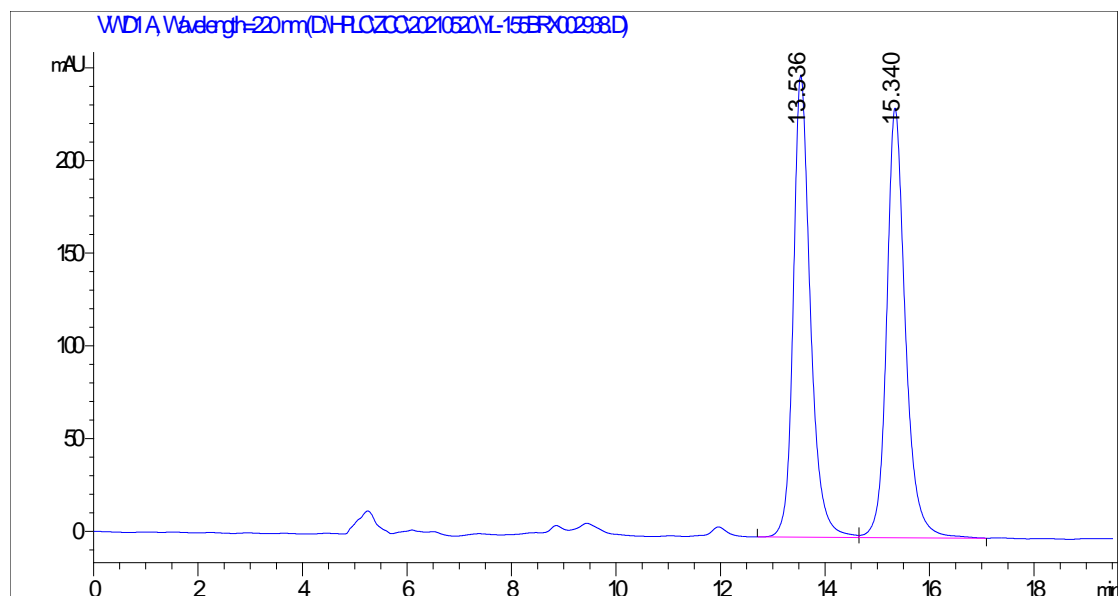

| # | Time   | Area   | Height | Width  | Symmetry | Area % |
|---|--------|--------|--------|--------|----------|--------|
| 1 | 13.536 | 5655.4 | 249.2  | 0.3406 | 0.732    | 49.529 |
| 2 | 15.34  | 5762.9 | 231.7  | 0.3733 | 0.765    | 50.471 |

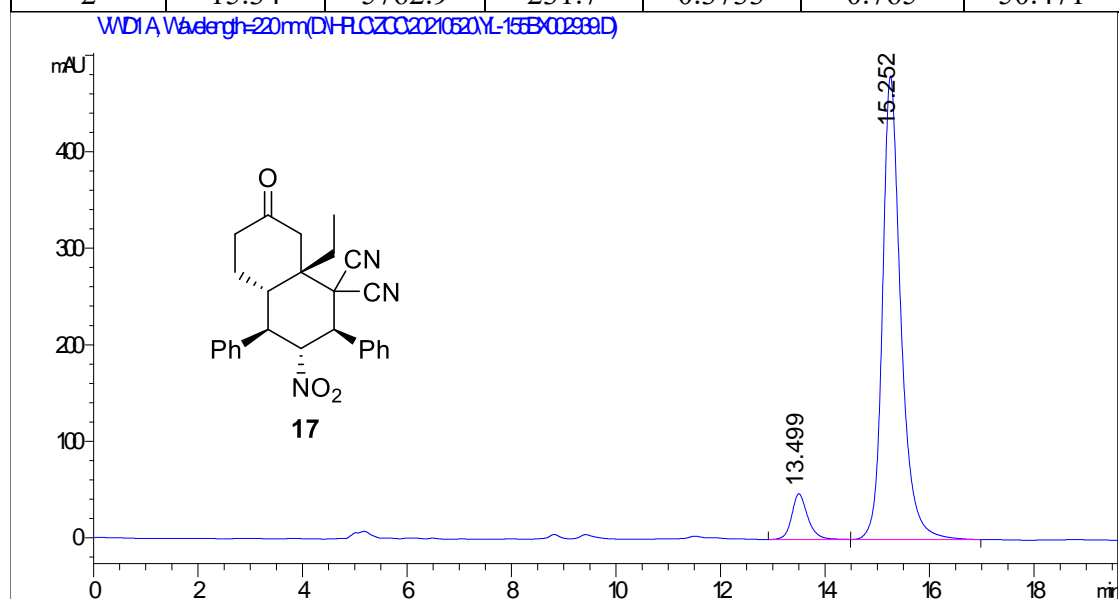

| # | Time   | Area    | Height | Width  | Symmetry | Area % |
|---|--------|---------|--------|--------|----------|--------|
| 1 | 13.499 | 1012.9  | 47.3   | 0.3225 | 0.768    | 7.952  |
| 2 | 15.252 | 11725.5 | 480.4  | 0.3635 | 0.712    | 92.048 |

## G: Determination of Absolute Configuration

The absolute configuration of compound **4p** (CCDC 1957050), **5f** (CCDC 1957048), **6p** (CCDC 1957049), **7p** (CCDC 1957051), **12b** (CDCC 1978462), **14** (CDCC 1978463) and **16** (CDCC 1978464) were unambiguously assigned by single crystal X-ray analysis.

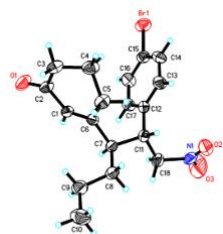

CCDC 1957050

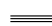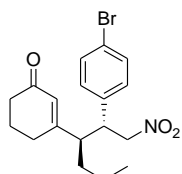

**4p**

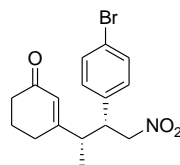

**5f**

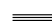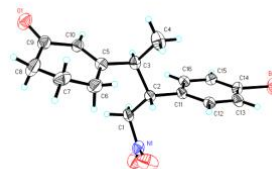

CCDC 1957048

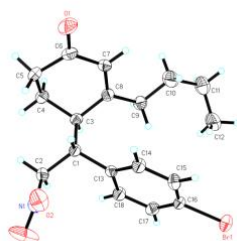

CCDC 1957049

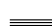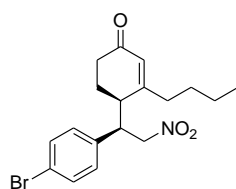

**6p**

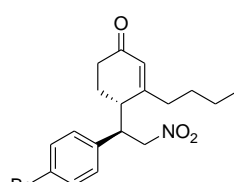

**7p**

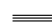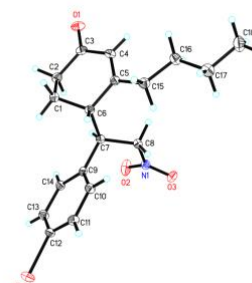

CCDC 1957051

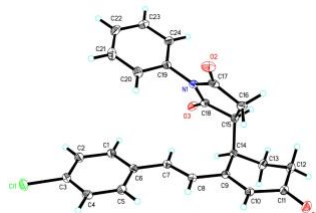

CCDC 1978462

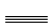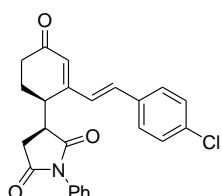

**12b**

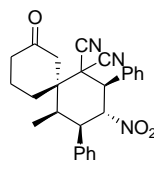

**14**

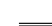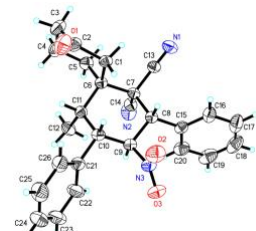

CCDC 1978463

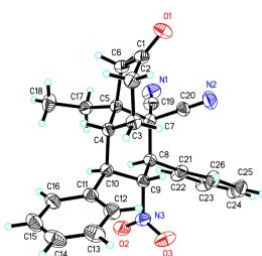

CCDC 1978464

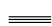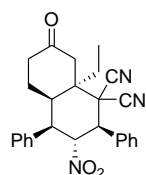

**16**

Crystal data and structure refinement for **4p** (CCDC 1957050)

|                                   |                                                   |          |
|-----------------------------------|---------------------------------------------------|----------|
| Identification code               | <b>4p</b>                                         |          |
| Empirical formula                 | C <sub>18</sub> H <sub>22</sub> BrNO <sub>3</sub> |          |
| Formula weight                    | 380.27                                            |          |
| Temperature                       | 293(2) K                                          |          |
| Wavelength                        | 0.71073 Å                                         |          |
| Crystal system                    | Orthorhombic                                      |          |
| Space group                       | P 21 21 21                                        |          |
| Unit cell dimensions              | a = 8.9889(10) Å                                  | a = 90°. |
|                                   | b = 10.1859(11) Å                                 | b = 90°. |
|                                   | c = 20.073(2) Å                                   | g = 90°. |
| Volume                            | 1837.9(3) Å <sup>3</sup>                          |          |
| Z                                 | 4                                                 |          |
| Density (calculated)              | 1.374 Mg/m <sup>3</sup>                           |          |
| Absorption coefficient            | 2.250 mm <sup>-1</sup>                            |          |
| F(000)                            | 784                                               |          |
| Crystal size                      | 0.211 x 0.175 x 0.123 mm <sup>3</sup>             |          |
| Theta range for data collection   | 2.029 to 25.999°.                                 |          |
| Index ranges                      | -11 ≤ h ≤ 9, -12 ≤ k ≤ 11, -24 ≤ l ≤ 20           |          |
| Reflections collected             | 11129                                             |          |
| Independent reflections           | 3617 [R(int) = 0.0387]                            |          |
| Completeness to theta = 25.242°   | 99.9 %                                            |          |
| Absorption correction             | Semi-empirical from equivalents                   |          |
| Max. and min. transmission        | 0.7457 and 0.5215                                 |          |
| Refinement method                 | Full-matrix least-squares on F <sup>2</sup>       |          |
| Data / restraints / parameters    | 3617 / 36 / 242                                   |          |
| Goodness-of-fit on F <sup>2</sup> | 1.035                                             |          |
| Final R indices [I > 2σ(I)]       | R1 = 0.0416, wR2 = 0.0934                         |          |
| R indices (all data)              | R1 = 0.0626, wR2 = 0.1018                         |          |
| Absolute structure parameter      | 0.005(8)                                          |          |
| Extinction coefficient            | n/a                                               |          |
| Largest diff. peak and hole       | 0.407 and -0.223 e.Å <sup>-3</sup>                |          |

Crystal data and structure refinement for **5f** (CCDC 1957048)

|                     |                                                   |
|---------------------|---------------------------------------------------|
| Identification code | <b>5f</b>                                         |
| Empirical formula   | C <sub>16</sub> H <sub>18</sub> BrNO <sub>3</sub> |
| Formula weight      | 352.22                                            |
| Temperature         | 293(2) K                                          |

|                                   |                                                                                                      |
|-----------------------------------|------------------------------------------------------------------------------------------------------|
| Wavelength                        | 0.71073 Å                                                                                            |
| Crystal system                    | Orthorhombic                                                                                         |
| Space group                       | P 21 21 21                                                                                           |
| Unit cell dimensions              | a = 8.4827(10) Å      a = 90°.<br>b = 10.4094(12) Å      b = 90°.<br>c = 17.8022(19) Å      g = 90°. |
| Volume                            | 1571.9(3) Å <sup>3</sup>                                                                             |
| Z                                 | 4                                                                                                    |
| Density (calculated)              | 1.488 Mg/m <sup>3</sup>                                                                              |
| Absorption coefficient            | 2.624 mm <sup>-1</sup>                                                                               |
| F(000)                            | 720                                                                                                  |
| Crystal size                      | 0.211 x 0.175 x 0.123 mm <sup>3</sup>                                                                |
| Theta range for data collection   | 2.266 to 25.997°.                                                                                    |
| Index ranges                      | -9<=h<=10, -12<=k<=12, -21<=l<=16                                                                    |
| Reflections collected             | 9482                                                                                                 |
| Independent reflections           | 3090 [R(int) = 0.0523]                                                                               |
| Completeness to theta = 25.242°   | 100.0 %                                                                                              |
| Absorption correction             | Semi-empirical from equivalents                                                                      |
| Max. and min. transmission        | 0.7457 and 0.5346                                                                                    |
| Refinement method                 | Full-matrix least-squares on F <sup>2</sup>                                                          |
| Data / restraints / parameters    | 3090 / 1 / 192                                                                                       |
| Goodness-of-fit on F <sup>2</sup> | 1.009                                                                                                |
| Final R indices [I>2sigma(I)]     | R1 = 0.0355, wR2 = 0.0811                                                                            |
| R indices (all data)              | R1 = 0.0488, wR2 = 0.0863                                                                            |
| Absolute structure parameter      | 0.016(9)                                                                                             |
| Extinction coefficient            | 0.0097(14)                                                                                           |
| Largest diff. peak and hole       | 0.238 and -0.292 e.Å <sup>-3</sup>                                                                   |

Crystal data and structure refinement for **6p** (CCDC 1957049)

|                      |                                                                           |
|----------------------|---------------------------------------------------------------------------|
| Identification code  | <b>6p</b>                                                                 |
| Empirical formula    | C <sub>18</sub> H <sub>22</sub> BrNO <sub>3</sub>                         |
| Formula weight       | 380.27                                                                    |
| Temperature          | 173(2) K                                                                  |
| Wavelength           | 0.71073 Å                                                                 |
| Crystal system       | Monoclinic                                                                |
| Space group          | P 21                                                                      |
| Unit cell dimensions | a = 10.5022(3) Å      α = 90°.<br>b = 7.3534(2) Å      β = 101.5450(10)°. |

|                                         |                                                                  |                       |
|-----------------------------------------|------------------------------------------------------------------|-----------------------|
|                                         | $c = 11.4093(3) \text{ \AA}$                                     | $\gamma = 90^\circ$ . |
| Volume                                  | 863.28(4) $\text{\AA}^3$                                         |                       |
| Z                                       | 2                                                                |                       |
| Density (calculated)                    | 1.463 $\text{Mg/m}^3$                                            |                       |
| Absorption coefficient                  | 2.395 $\text{mm}^{-1}$                                           |                       |
| F(000)                                  | 392                                                              |                       |
| Crystal size                            | 0.180 x 0.150 x 0.120 $\text{mm}^3$                              |                       |
| Theta range for data collection         | 2.947 to 25.992 $^\circ$ .                                       |                       |
| Index ranges                            | -12 $\leq h \leq 12$ , -8 $\leq k \leq 9$ , -14 $\leq l \leq 14$ |                       |
| Reflections collected                   | 14120                                                            |                       |
| Independent reflections                 | 3291 [R(int) = 0.0364]                                           |                       |
| Completeness to theta = 25.242 $^\circ$ | 99.2 %                                                           |                       |
| Absorption correction                   | Semi-empirical from equivalents                                  |                       |
| Max. and min. transmission              | 0.7456 and 0.4350                                                |                       |
| Refinement method                       | Full-matrix least-squares on $F^2$                               |                       |
| Data / restraints / parameters          | 3291 / 1 / 210                                                   |                       |
| Goodness-of-fit on $F^2$                | 1.039                                                            |                       |
| Final R indices [I > 2 $\sigma$ (I)]    | R1 = 0.0232, wR2 = 0.0563                                        |                       |
| R indices (all data)                    | R1 = 0.0244, wR2 = 0.0568                                        |                       |
| Absolute structure parameter            | 0.032(5)                                                         |                       |
| Largest diff. peak and hole             | 0.387 and -0.391 $\text{e.\AA}^{-3}$                             |                       |

Crystal data and structure refinement for **7p** (CCDC 1957051)

|                        |                                           |                       |
|------------------------|-------------------------------------------|-----------------------|
| Identification code    | <b>7p</b>                                 |                       |
| Empirical formula      | $\text{C}_{18}\text{H}_{22}\text{BrNO}_3$ |                       |
| Formula weight         | 380.27                                    |                       |
| Temperature            | 293(2) K                                  |                       |
| Wavelength             | 0.71073 $\text{\AA}$                      |                       |
| Crystal system         | Orthorhombic                              |                       |
| Space group            | P 21 21 21                                |                       |
| Unit cell dimensions   | $a = 5.5537(11) \text{ \AA}$              | $\alpha = 90^\circ$ . |
|                        | $b = 10.753(2) \text{ \AA}$               | $\beta = 90^\circ$ .  |
|                        | $c = 29.963(5) \text{ \AA}$               | $\gamma = 90^\circ$ . |
| Volume                 | 1789.3(6) $\text{\AA}^3$                  |                       |
| Z                      | 4                                         |                       |
| Density (calculated)   | 1.412 $\text{Mg/m}^3$                     |                       |
| Absorption coefficient | 2.311 $\text{mm}^{-1}$                    |                       |

|                                   |                                             |
|-----------------------------------|---------------------------------------------|
| F(000)                            | 784                                         |
| Crystal size                      | 0.200 x 0.160 x 0.120 mm <sup>3</sup>       |
| Theta range for data collection   | 1.359 to 25.494°.                           |
| Index ranges                      | -6<=h<=6, -13<=k<=12, -36<=l<=31            |
| Reflections collected             | 10277                                       |
| Independent reflections           | 3326 [R(int) = 0.0498]                      |
| Completeness to theta = 25.242°   | 100.0 %                                     |
| Absorption correction             | Semi-empirical from equivalents             |
| Max. and min. transmission        | 0.7456 and 0.5127                           |
| Refinement method                 | Full-matrix least-squares on F <sup>2</sup> |
| Data / restraints / parameters    | 3326 / 40 / 228                             |
| Goodness-of-fit on F <sup>2</sup> | 1.026                                       |
| Final R indices [I>2sigma(I)]     | R1 = 0.0405, wR2 = 0.0927                   |
| R indices (all data)              | R1 = 0.0594, wR2 = 0.1000                   |
| Absolute structure parameter      | 0.020(9)                                    |
| Extinction coefficient            | n/a                                         |
| Largest diff. peak and hole       | 0.421 and -0.297 e.Å <sup>-3</sup>          |

Crystal data and structure refinement for **12b** (CCDC 1978462)

|                                 |                                                                                                    |
|---------------------------------|----------------------------------------------------------------------------------------------------|
| Identification code             | <b>12b</b>                                                                                         |
| Empirical formula               | C <sub>24</sub> H <sub>20</sub> ClNO <sub>3</sub>                                                  |
| Formula weight                  | 405.86                                                                                             |
| Temperature                     | 130 K                                                                                              |
| Wavelength                      | 0.71073 Å                                                                                          |
| Crystal system                  | Orthorhombic                                                                                       |
| Space group                     | P 21 21 21                                                                                         |
| Unit cell dimensions            | a = 10.9525(7) Å      a = 90°.<br>b = 13.3638(9) Å      b = 90°.<br>c = 13.3808(9) Å      γ = 90°. |
| Volume                          | 1958.5(2) Å <sup>3</sup>                                                                           |
| Z                               | 4                                                                                                  |
| Density (calculated)            | 1.376 Mg/m <sup>3</sup>                                                                            |
| Absorption coefficient          | 0.221 mm <sup>-1</sup>                                                                             |
| F(000)                          | 848                                                                                                |
| Crystal size                    | 0.35 x 0.3 x 0.22 mm <sup>3</sup>                                                                  |
| Theta range for data collection | 2.154 to 30.543°.                                                                                  |
| Index ranges                    | -15<=h<=15, -17<=k<=19, -19<=l<=18                                                                 |
| Reflections collected           | 19828                                                                                              |

|                                   |                                             |
|-----------------------------------|---------------------------------------------|
| Independent reflections           | 5979 [R(int) = 0.0274]                      |
| Completeness to theta = 25.242°   | 100.0 %                                     |
| Absorption correction             | Semi-empirical from equivalents             |
| Max. and min. transmission        | 0.7461 and 0.6990                           |
| Refinement method                 | Full-matrix least-squares on F <sup>2</sup> |
| Data / restraints / parameters    | 5979 / 0 / 262                              |
| Goodness-of-fit on F <sup>2</sup> | 1.034                                       |
| Final R indices [I>2sigma(I)]     | R1 = 0.0357, wR2 = 0.0836                   |
| R indices (all data)              | R1 = 0.0430, wR2 = 0.0876                   |
| Absolute structure parameter      | 0.012(18)                                   |
| Extinction coefficient            | n/a                                         |
| Largest diff. peak and hole       | 0.228 and -0.236 e.Å <sup>-3</sup>          |

Crystal data and structure refinement for **14** (CCDC 1978463)

|                                 |                                                                                                              |
|---------------------------------|--------------------------------------------------------------------------------------------------------------|
| Identification code             | <b>14</b>                                                                                                    |
| Empirical formula               | C <sub>26</sub> H <sub>25</sub> N <sub>3</sub> O <sub>3</sub>                                                |
| Formula weight                  | 427.49                                                                                                       |
| Temperature                     | 293(2) K                                                                                                     |
| Wavelength                      | 1.54178 Å                                                                                                    |
| Crystal system                  | Monoclinic                                                                                                   |
| Space group                     | P 21/n                                                                                                       |
| Unit cell dimensions            | a = 6.56750(10) Å      a = 90°.<br>b = 28.7020(6) Å      b = 99.5090(10)°.<br>c = 12.4932(3) Å      γ = 90°. |
| Volume                          | 2322.61(8) Å <sup>3</sup>                                                                                    |
| Z                               | 4                                                                                                            |
| Density (calculated)            | 1.223 Mg/m <sup>3</sup>                                                                                      |
| Absorption coefficient          | 0.652 mm <sup>-1</sup>                                                                                       |
| F(000)                          | 904                                                                                                          |
| Crystal size                    | 0.200 x 0.140 x 0.100 mm <sup>3</sup>                                                                        |
| Theta range for data collection | 3.904 to 67.466°.                                                                                            |
| Index ranges                    | -7<=h<=7, -34<=k<=34, -14<=l<=14                                                                             |
| Reflections collected           | 31317                                                                                                        |
| Independent reflections         | 4115 [R(int) = 0.0595]                                                                                       |
| Completeness to theta = 67.679° | 98.3 %                                                                                                       |
| Absorption correction           | Semi-empirical from equivalents                                                                              |
| Max. and min. transmission      | 0.7456 and 0.6132                                                                                            |
| Refinement method               | Full-matrix least-squares on F <sup>2</sup>                                                                  |

|                                      |                                    |
|--------------------------------------|------------------------------------|
| Data / restraints / parameters       | 4115 / 1 / 291                     |
| Goodness-of-fit on $F^2$             | 1.031                              |
| Final R indices [ $I > 2\sigma(I)$ ] | R1 = 0.0453, wR2 = 0.1129          |
| R indices (all data)                 | R1 = 0.0543, wR2 = 0.1208          |
| Extinction coefficient               | 0.0066(10)                         |
| Largest diff. peak and hole          | 0.171 and -0.136 e.Å <sup>-3</sup> |

Crystal data and structure refinement for **16** (CCDC 1978464)

|                                      |                                                                                                    |
|--------------------------------------|----------------------------------------------------------------------------------------------------|
| Identification code                  | <b>16</b>                                                                                          |
| Empirical formula                    | C <sub>28</sub> H <sub>28</sub> N <sub>4</sub> O <sub>3</sub>                                      |
| Formula weight                       | 468.54                                                                                             |
| Temperature                          | 293(2) K                                                                                           |
| Wavelength                           | 1.54178 Å                                                                                          |
| Crystal system                       | Hexagonal                                                                                          |
| Space group                          | P 63                                                                                               |
| Unit cell dimensions                 | a = 24.6130(6) Å      a = 90°.<br>b = 24.6130(6) Å      b = 90°.<br>c = 8.0200(2) Å      γ = 120°. |
| Volume                               | 4207.6(2) Å <sup>3</sup>                                                                           |
| Z                                    | 6                                                                                                  |
| Density (calculated)                 | 1.109 Mg/m <sup>3</sup>                                                                            |
| Absorption coefficient               | 0.590 mm <sup>-1</sup>                                                                             |
| F(000)                               | 1488                                                                                               |
| Crystal size                         | 0.200 x 0.160 x 0.120 mm <sup>3</sup>                                                              |
| Theta range for data collection      | 5.491 to 66.976°.                                                                                  |
| Index ranges                         | -29 ≤ h ≤ 27, -28 ≤ k ≤ 28, -8 ≤ l ≤ 9                                                             |
| Reflections collected                | 69597                                                                                              |
| Independent reflections              | 4925 [R(int) = 0.0583]                                                                             |
| Completeness to theta = 67.679°      | 97.6 %                                                                                             |
| Absorption correction                | Semi-empirical from equivalents                                                                    |
| Max. and min. transmission           | 0.7533 and 0.5333                                                                                  |
| Refinement method                    | Full-matrix least-squares on $F^2$                                                                 |
| Data / restraints / parameters       | 4925 / 1 / 319                                                                                     |
| Goodness-of-fit on $F^2$             | 1.085                                                                                              |
| Final R indices [ $I > 2\sigma(I)$ ] | R1 = 0.0363, wR2 = 0.0939                                                                          |
| R indices (all data)                 | R1 = 0.0388, wR2 = 0.0956                                                                          |
| Absolute structure parameter         | 0.04(8)                                                                                            |
| Extinction coefficient               | 0.0045(5)                                                                                          |
| Largest diff. peak and hole          | 0.129 and -0.135 e.Å <sup>-3</sup>                                                                 |



## H. DFT Calculations details

To make the calculation more efficiently, the reaction models were simplified and named as followings:

### Simplified reaction models

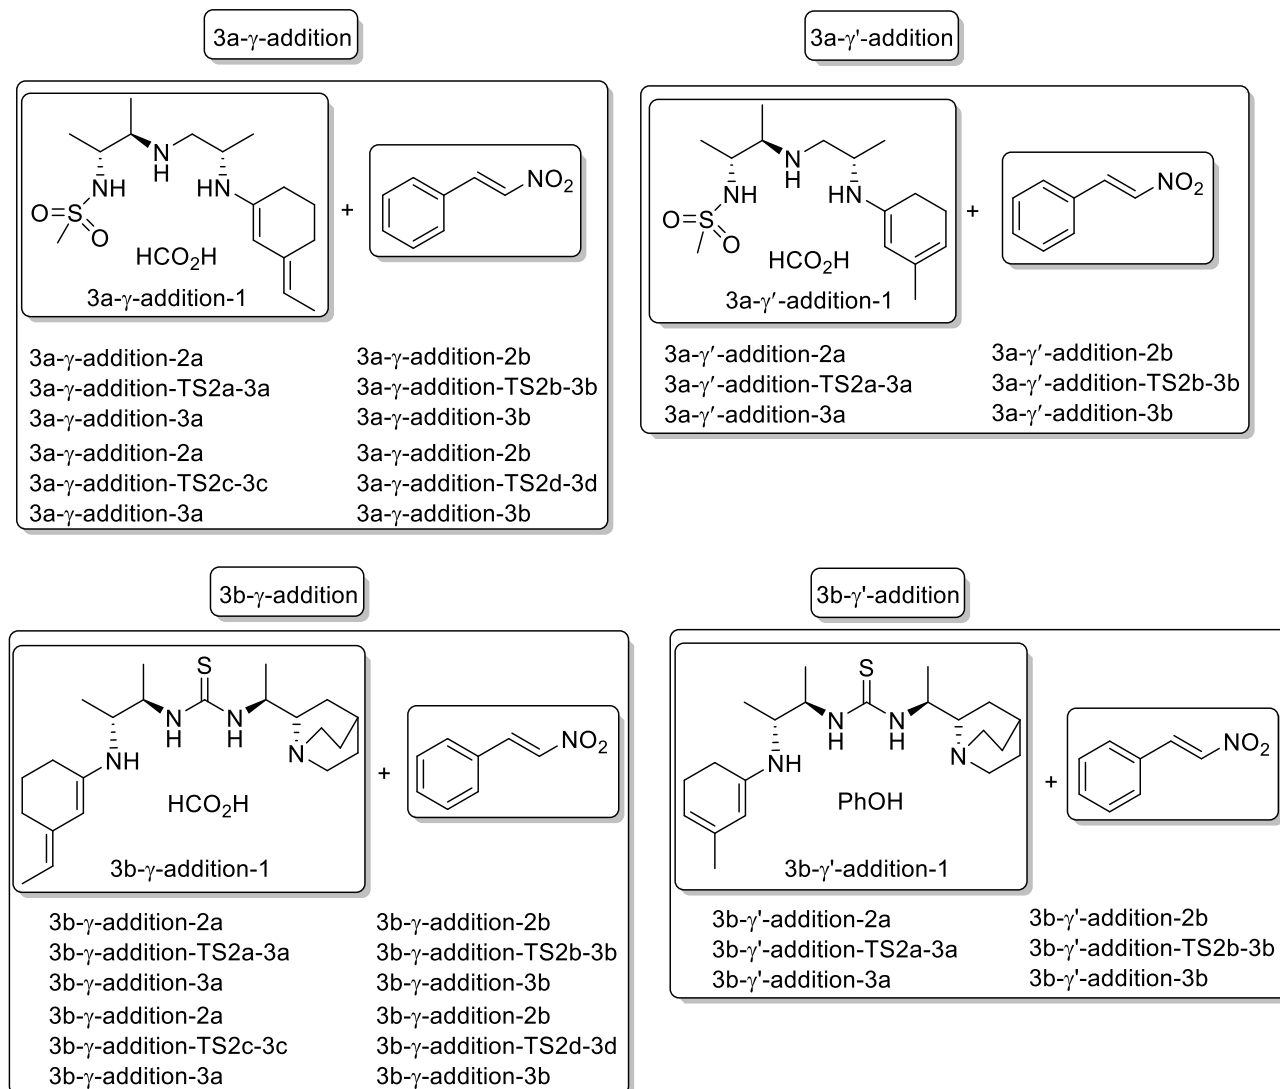

All the structure were optimized with the Gaussian 09 program using the M06-2X functional together with the 6-31+G(d) basis set, the -D3 dispersion correction, and the SMD continuum solvent model with parameters for toluene, followed by frequency calculations at the same level of theory. Gas-phase single point energy calculations at these optimized structures were performed using M06-2X-D3 and the larger 6-311+G(2d,p) basis set. Combining the gas-phase 6-31+G(d) and 6-311+G(2d,p) electronic energies, the SMD-corrected 6-31+G(d) energy, and the free-energy correction yields the solution-phase free energies that were used to compare the various reaction pathways. That is, the relative free energy was calculated using the following equation:

$$\Delta G_A = \Delta E^{elec} + \Delta E^{thermal} - T\Delta S + \Delta G^{solv}$$

where  $\Delta G$  is the free energy change relative to the separated reactants for species A;  $\Delta E^{elec}$  is the total electronic energy change in vacuum;  $\Delta E^{thermal}$  is the total internal thermal energy change including the

contributions due to translation, rotational, and vibrational motions;  $\Delta S$  is the total solute entropy change; and  $\Delta G^{solv}$  is the solvation free energy change in a specific solvent. Unless we specify otherwise, the Gibbs free energy should be taken as referring to combination of the single-point electronic energies at M06-2X-D3/6-311+G(2d,p) level of theory and the SMD solvation free energies and the vibrational free-energy corrections at M06-2X-D3/6-31+G(d) level.

Gaussian 09, Revision E.01, Frisch, M. J.; Trucks, G. W.; Schlegel, H. B.; Scuseria, G. E.; Robb, M. A.; Cheeseman, J. R.; Scalmani, G.; Barone, V.; Mennucci, B.; Petersson, G. A.; Nakatsuji, H.; Caricato, M.; Li, X.; Hratchian, H. P.; Izmaylov, A. F.; Bloino, J.; Zheng, G.; Sonnenberg, J. L.; Hada, M.; Ehara, M.; Toyota, K.; Fukuda, R.; Hasegawa, J.; Ishida, M.; Nakajima, T.; Honda, Y.; Kitao, O.; Nakai, H.; Vreven, T.; Montgomery, J. A., Jr.; Peralta, J. E.; Ogliaro, F.; Bearpark, M.; Heyd, J. J.; Brothers, E.; Kudin, K. N.; Staroverov, V. N.; Kobayashi, R.; Normand, J.; Raghavachari, K.; Rendell, A.; Burant, J. C.; Iyengar, S. S.; Tomasi, J.; Cossi, M.; Rega, N.; Millam, J. M.; Klene, M.; Knox, J. E.; Cross, J. B.; Bakken, V.; Adamo, C.; Jaramillo, J.; Gomperts, R.; Stratmann, R. E.; Yazyev, O.; Austin, A. J.; Cammi, R.; Pomelli, C.; Ochterski, J. W.; Martin, R. L.; Morokuma, K.; Zakrzewski, V. G.; Voth, G. A.; Salvador, P.; Dannenberg, J. J.; Dapprich, S.; Daniels, A. D.; Farkas, Ö.; Foresman, J. B.; Ortiz, J. V.; Cioslowski, J.; Fox, D. J. Gaussian, Inc., Wallingford CT, **2009**.

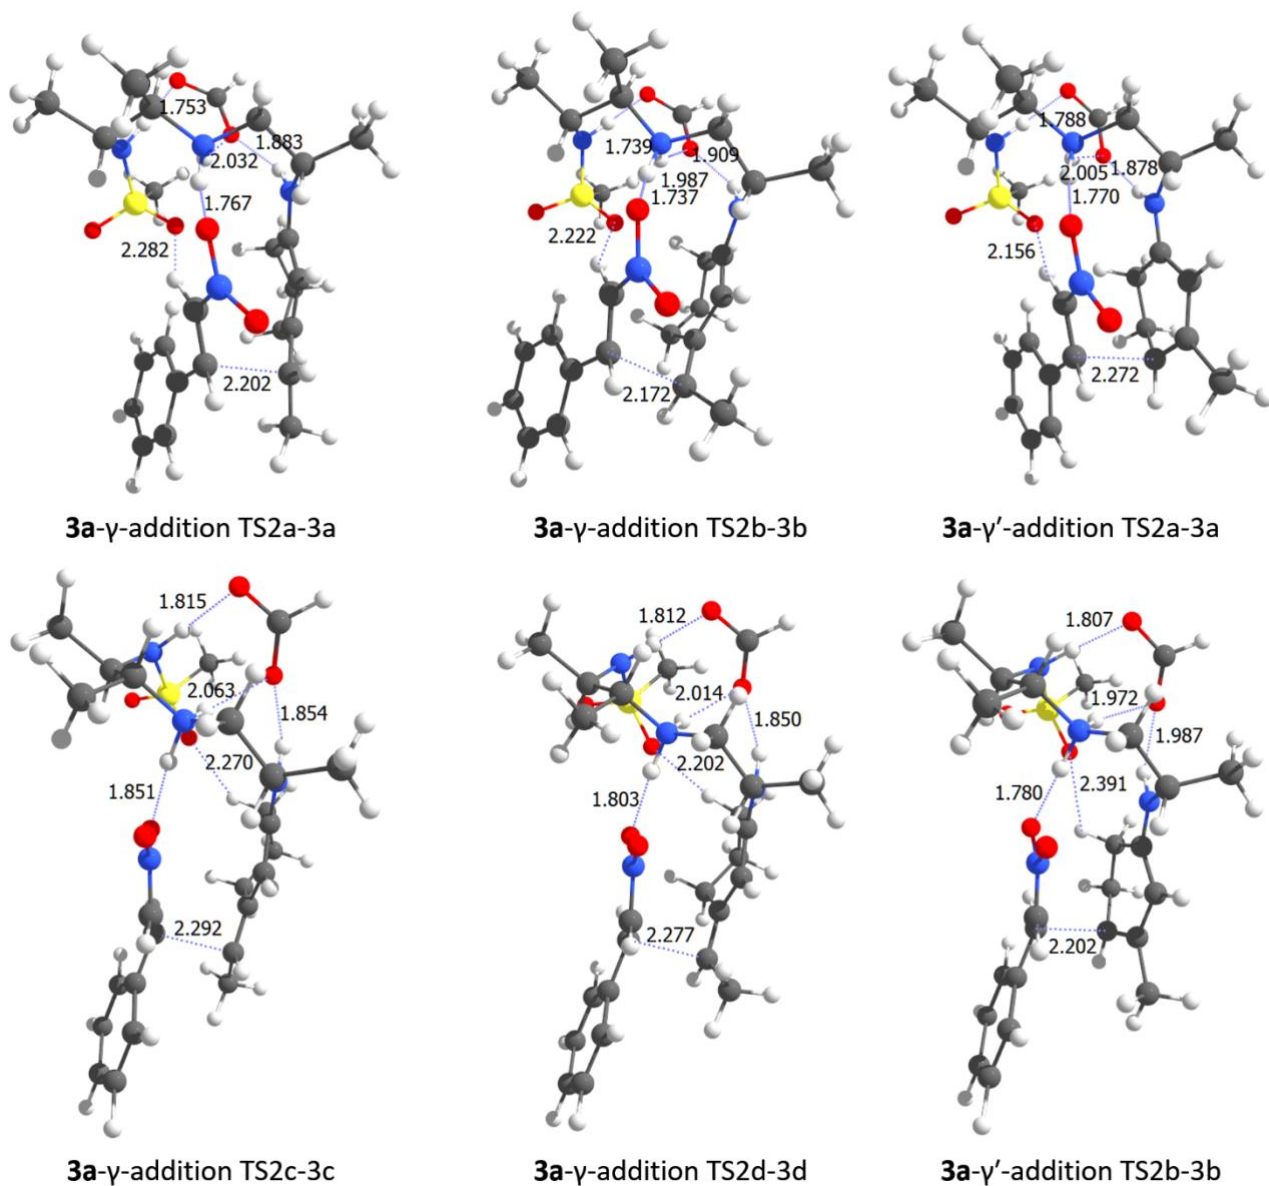

Figure S7. Optimized geometries of the transition states for 3a- $\gamma/\gamma'$ -addition. The bond lengths are in angstrom.

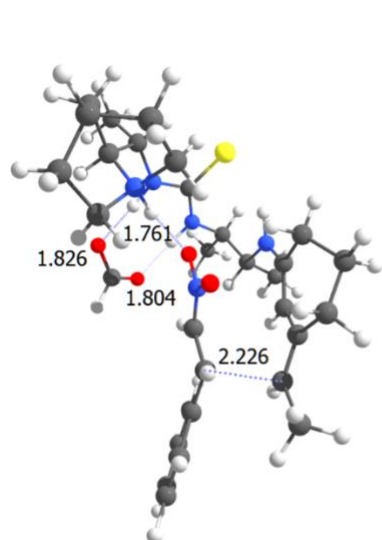

**3b- $\gamma$ -addition TS2a-3a**

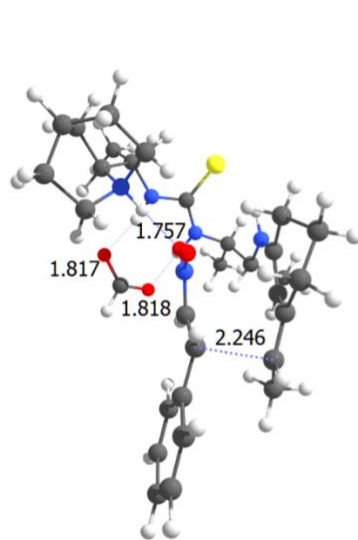

**3b- $\gamma$ -addition TS2b-3b**

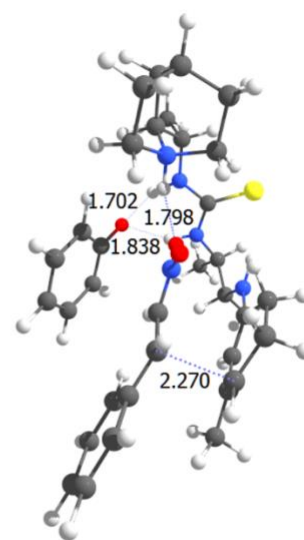

**3b- $\gamma'$ -addition TS2a-3a**

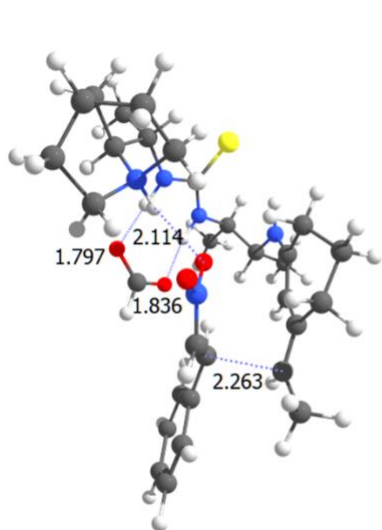

**3b- $\gamma$ -addition TS2c-3c**

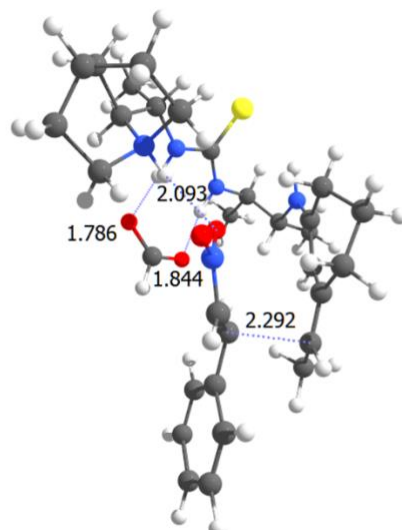

**3b- $\gamma$ -addition TS2d-3d**

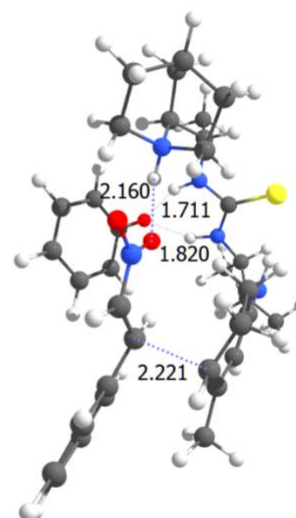

**3b- $\gamma'$ -addition TS2b-3b**

Figure S8. Optimized geometries of the transition states for 3b- $\gamma/\gamma'$ -addition. The bond lengths are in angstrom.

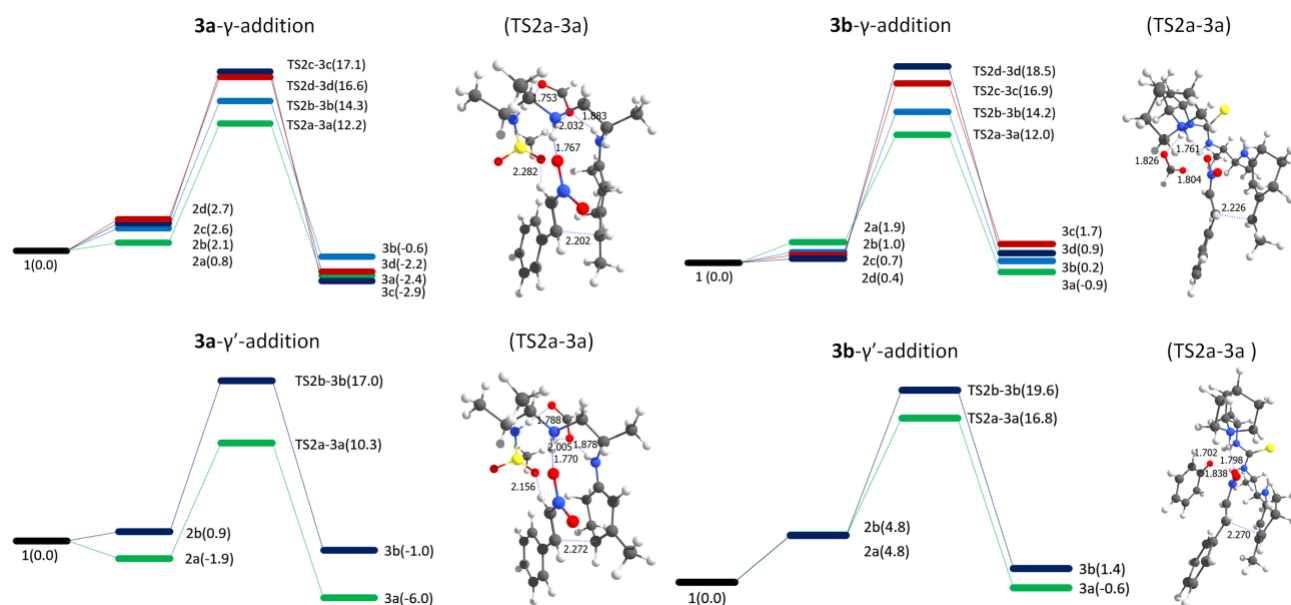

Figure S9. Gibbs free energy profiles for the four additions. All the energies are in kcal/mol, and relative to the catalyst-die namine-additive plus a free nitrostyrene.

|                                          |          |          |          |                                           |          |          |          |
|------------------------------------------|----------|----------|----------|-------------------------------------------|----------|----------|----------|
| nitroethylene                            |          |          |          | H                                         | 1.17321  | 2.94275  | 0.98476  |
| Geometry with 18 atoms:                  |          |          |          | H                                         | 0.99609  | 3.39137  | -0.72971 |
| N                                        | 2.98034  | 0.03463  | 0.00865  | H                                         | 0.80878  | 0.80740  | -0.99430 |
| C                                        | 1.59180  | 0.45278  | 0.03396  | H                                         | 3.41116  | 1.72778  | 0.02711  |
| C                                        | 0.61748  | -0.45904 | -0.03419 | H                                         | 2.82446  | -0.25443 | -2.21963 |
| O                                        | 3.25326  | -1.15338 | -0.07624 | H                                         | 3.00818  | -0.89584 | 0.72060  |
| O                                        | 3.81232  | 0.92942  | 0.07648  | H                                         | -3.22095 | 1.74417  | -0.68594 |
| C                                        | -0.81989 | -0.18032 | -0.02090 | H                                         | -5.23854 | 1.18286  | -1.71216 |
| C                                        | -1.34413 | 1.12198  | -0.05606 | H                                         | -7.37212 | -0.22411 | -1.48380 |
| C                                        | -1.70405 | -1.26702 | 0.02789  | H                                         | -6.39970 | -0.78927 | -2.83717 |
| C                                        | -2.71778 | 1.32550  | -0.03539 | H                                         | -6.38579 | -1.68450 | -1.31697 |
| C                                        | -3.08097 | -1.06160 | 0.05051  | H                                         | 3.91376  | 2.25034  | -2.48475 |
| C                                        | -3.58979 | 0.23492  | 0.02008  | H                                         | 2.16614  | 2.19399  | -2.74344 |
| H                                        | 1.49543  | 1.52670  | 0.11604  | H                                         | 2.88806  | 3.41904  | -1.67140 |
| H                                        | 0.91421  | -1.50442 | -0.09647 | H                                         | 5.23965  | 0.05121  | -0.35723 |
| H                                        | -0.67790 | 1.97844  | -0.10810 | H                                         | 5.06382  | -1.11533 | -1.67979 |
| H                                        | -1.30461 | -2.27805 | 0.05067  | H                                         | 5.20476  | 0.61445  | -2.04391 |
| H                                        | -3.11270 | 2.33669  | -0.06577 | H                                         | -1.41735 | -1.40701 | 1.05370  |
| H                                        | -3.75410 | -1.91280 | 0.09018  | H                                         | -1.76524 | -0.51598 | 2.53583  |
| H                                        | -4.66333 | 0.39954  | 0.03557  | H                                         | -3.42918 | -2.38942 | 2.06261  |
|                                          |          |          |          | H                                         | -4.17973 | -0.79952 | 2.23915  |
| <b>3a-<math>\gamma</math>-addition-1</b> |          |          |          | H                                         | -3.47380 | -2.14828 | -0.41470 |
| Geometry with 58 atoms:                  |          |          |          | H                                         | -5.09802 | -2.02084 | 0.26403  |
| C                                        | -0.76543 | 2.47725  | 0.09176  | C                                         | -1.40557 | 3.79505  | 0.53185  |
| N                                        | -1.10877 | 1.36532  | 0.94540  | H                                         | -1.03525 | 4.08392  | 1.52182  |
| C                                        | -2.18547 | 0.53827  | 0.72362  | H                                         | -1.18800 | 4.60318  | -0.17614 |
| C                                        | 0.75342  | 2.63805  | 0.01997  | H                                         | -2.49074 | 3.67831  | 0.59984  |
| N                                        | 1.39934  | 1.34259  | -0.33873 | H                                         | 1.39621  | 0.77082  | 0.55342  |
| C                                        | 2.81483  | 1.39983  | -0.83385 | O                                         | 1.32929  | 0.46356  | 2.20156  |
| C                                        | 3.26700  | -0.02558 | -1.23980 | C                                         | 2.29921  | -0.01254 | 2.86398  |
| N                                        | 2.81584  | -1.04574 | -0.29710 | O                                         | 3.30000  | -0.59208 | 2.39728  |
| C                                        | -2.14617 | -0.73538 | 1.52974  | H                                         | 2.23564  | 0.09663  | 3.96482  |
| C                                        | -3.18966 | 0.79590  | -0.15274 | H                                         | 2.20172  | -3.38103 | 1.10614  |
| C                                        | -4.26077 | -0.15863 | -0.45008 | H                                         | 1.01805  | -2.12060 | 1.62888  |
| S                                        | 1.52369  | -1.98520 | -0.67743 | H                                         | 0.46452  | -3.54761 | 0.68308  |
| O                                        | 0.32839  | -1.16308 | -0.95547 |                                           |          |          |          |
| O                                        | 1.89377  | -2.92434 | -1.73544 | <b>3a-<math>\gamma</math>-addition-2a</b> |          |          |          |
| C                                        | 1.28410  | -2.84541 | 0.85608  | Geometry with 76 atoms:                   |          |          |          |
| C                                        | -5.26221 | 0.17670  | -1.28846 | C                                         | 1.35141  | -2.92894 | -0.10496 |
| C                                        | -3.51672 | -1.39897 | 1.60232  | N                                         | 0.83686  | -2.14161 | -1.20334 |
| C                                        | -4.12911 | -1.51771 | 0.20519  | C                                         | -0.48344 | -1.83126 | -1.39068 |
| C                                        | 4.78878  | -0.11323 | -1.34224 | C                                         | 2.65909  | -2.32355 | 0.41277  |
| C                                        | 2.94647  | 2.37736  | -1.99467 | N                                         | 2.48608  | -0.85934 | 0.63707  |
| C                                        | -6.40749 | -0.67911 | -1.74473 | C                                         | 3.58547  | -0.15025 | 1.37769  |
| H                                        | -1.11683 | 2.23083  | -0.92252 | C                                         | 3.25232  | 1.35760  | 1.41811  |
| H                                        | -0.44973 | 1.08895  | 1.66858  | N                                         | 3.08715  | 1.89599  | 0.06245  |



|   |          |          |          |                                           |          |          |          |
|---|----------|----------|----------|-------------------------------------------|----------|----------|----------|
| H | 0.77749  | -2.93423 | 0.74358  | H                                         | 1.11566  | -4.88165 | -0.76688 |
| H | 1.71906  | -1.80096 | -1.82309 | H                                         | 2.19194  | -0.29292 | -0.13749 |
| H | 3.59904  | -2.12954 | -0.10827 | O                                         | 3.01352  | -0.44304 | -1.99014 |
| H | 3.01177  | -2.58673 | 1.51487  | C                                         | 4.22468  | -0.10890 | -2.12695 |
| H | 1.45142  | -0.70053 | 1.32209  | O                                         | 4.81003  | 0.80517  | -1.50710 |
| H | 4.30792  | 0.00955  | 1.00264  | H                                         | 4.81905  | -0.67902 | -2.87171 |
| H | 1.91695  | 1.68737  | 1.90389  | H                                         | 2.53170  | 3.41404  | -2.33956 |
| H | 3.56932  | 1.61342  | -0.56864 | H                                         | 2.24668  | 1.65847  | -2.69362 |
| H | -1.14103 | -2.84182 | 0.31520  | H                                         | 0.89446  | 2.84224  | -2.80590 |
| H | -3.29770 | -2.56649 | 1.03209  |                                           |          |          |          |
| H | -5.50964 | -2.50233 | -0.49354 |                                           |          |          |          |
| H | -5.54442 | -1.53794 | 0.98180  | <b>3a-<math>\gamma</math>-addition-3a</b> |          |          |          |
| H | -5.24101 | -0.75251 | -0.57252 | Geometry with 76 atoms:                   |          |          |          |
| N | -0.95048 | -1.27858 | 2.36955  | C                                         | 2.00942  | -2.73182 | 0.39262  |
| C | -1.51009 | -0.27334 | 1.63828  | N                                         | 1.60000  | -2.29320 | -0.94870 |
| C | -2.89646 | -0.21213 | 1.46375  | C                                         | 0.39028  | -2.11098 | -1.40642 |
| O | -1.64523 | -2.18775 | 2.85595  | C                                         | 2.87286  | -1.64041 | 1.02487  |
| O | 0.31263  | -1.28209 | 2.54103  | N                                         | 2.11084  | -0.37666 | 1.13443  |
| C | -3.48509 | 0.98070  | 0.82873  | C                                         | 2.86649  | 0.75757  | 1.75923  |
| C | -2.76672 | 1.75246  | -0.09965 | C                                         | 2.15587  | 2.07687  | 1.40468  |
| C | -4.78678 | 1.37798  | 1.16702  | N                                         | 2.24257  | 2.31624  | -0.04687 |
| C | -3.33936 | 2.88567  | -0.66908 | C                                         | 0.25945  | -1.53299 | -2.78810 |
| C | -5.35991 | 2.50988  | 0.59305  | C                                         | -0.77360 | -2.37035 | -0.61392 |
| C | -4.63812 | 3.26699  | -0.32920 | C                                         | -1.96757 | -1.80867 | -0.93609 |
| H | -0.79861 | 0.39885  | 1.17935  | S                                         | 0.88064  | 2.17286  | -0.94309 |
| H | -3.50410 | -0.69658 | 2.22461  | O                                         | 0.29049  | 0.81860  | -0.82422 |
| H | -1.75026 | 1.47365  | -0.37013 | O                                         | -0.04134 | 3.26353  | -0.62333 |
| H | -5.34770 | 0.79924  | 1.89719  | C                                         | 1.53564  | 2.36581  | -2.58032 |
| H | -2.76353 | 3.47906  | -1.37426 | C                                         | -3.06181 | -1.90718 | 0.09667  |
| H | -6.36778 | 2.80432  | 0.87201  | C                                         | -1.17691 | -1.60499 | -3.29675 |
| H | -5.08095 | 4.15385  | -0.77367 | C                                         | -2.15033 | -1.08450 | -2.23884 |
| H | 4.27972  | 0.17788  | 3.49119  | C                                         | 2.75770  | 3.27477  | 2.13297  |
| H | 2.54440  | -0.21666 | 3.52470  | C                                         | 2.97700  | 0.53738  | 3.26329  |
| H | 3.74397  | -1.42691 | 3.03109  | C                                         | -4.46544 | -2.04176 | -0.49151 |
| H | 4.89990  | 2.38950  | 1.88671  | H                                         | 1.11960  | -2.86433 | 1.01415  |
| H | 3.57452  | 3.55479  | 2.06133  | H                                         | 2.36658  | -1.91416 | -1.52889 |
| H | 3.83572  | 2.33062  | 3.31663  | H                                         | 3.78034  | -1.45975 | 0.43879  |
| H | -0.42410 | -0.02059 | -2.36484 | H                                         | 3.14954  | -1.96772 | 2.02895  |
| H | 0.24455  | -1.28580 | -3.39945 | H                                         | 1.21395  | -0.59903 | 1.77971  |
| H | -2.12279 | -0.72100 | -4.06103 | H                                         | 3.86269  | 0.77036  | 1.29657  |
| H | -1.97768 | -2.39981 | -3.53389 | H                                         | 1.09610  | 1.98581  | 1.68463  |
| H | -3.07283 | -0.03891 | -1.91789 | H                                         | 3.09983  | 1.94070  | -0.51796 |
| H | -3.96136 | -1.45371 | -2.45851 | H                                         | -0.68701 | -2.89240 | 0.33503  |
| C | 1.97709  | -4.32167 | -0.39184 | H                                         | -2.84007 | -2.80769 | 0.67702  |
| H | 2.74489  | -4.30229 | -1.17348 | H                                         | -4.51633 | -2.89978 | -1.17149 |
| H | 2.37796  | -4.84742 | 0.48105  | H                                         | -5.18906 | -2.21423 | 0.31261  |
|   |          |          |          | H                                         | -4.78515 | -1.14874 | -1.03632 |



|                                           |          |          |          |   |          |          |          |
|-------------------------------------------|----------|----------|----------|---|----------|----------|----------|
| N                                         | -0.89180 | -1.37273 | 2.31476  | N | 0.86345  | 2.15123  | 1.35001  |
| C                                         | -1.62062 | -0.46711 | 1.72201  | C | -0.43951 | 1.77946  | 1.55378  |
| C                                         | -2.99222 | -0.74945 | 1.18138  | C | 2.61882  | 2.32414  | -0.34454 |
| O                                         | -1.24994 | -2.58892 | 2.44199  | N | 2.42953  | 0.86732  | -0.60266 |
| O                                         | 0.29692  | -1.03130 | 2.79938  | C | 3.51122  | 0.16899  | -1.38043 |
| C                                         | -3.63996 | 0.54208  | 0.71398  | C | 3.13675  | -1.32415 | -1.50774 |
| C                                         | -2.92262 | 1.49484  | -0.01803 | N | 2.96570  | -1.93836 | -0.18505 |
| C                                         | -4.98443 | 0.79944  | 1.00374  | C | -0.60995 | 0.79856  | 2.68983  |
| C                                         | -3.53467 | 2.66806  | -0.45714 | C | -1.50022 | 2.22978  | 0.82245  |
| C                                         | -5.60284 | 1.96714  | 0.55959  | C | -2.85414 | 1.71946  | 1.01358  |
| C                                         | -4.87940 | 2.90535  | -0.17613 | S | 1.44377  | -2.27728 | 0.32233  |
| H                                         | -1.19418 | 0.52604  | 1.70014  | O | 0.58194  | -1.07700 | 0.28714  |
| H                                         | -3.60347 | -1.15558 | 2.00176  | O | 0.91764  | -3.42173 | -0.42572 |
| H                                         | -1.86949 | 1.33280  | -0.23570 | C | 1.73916  | -2.71331 | 2.01539  |
| H                                         | -5.55213 | 0.07911  | 1.58956  | C | -3.94539 | 2.17866  | 0.36269  |
| H                                         | -2.94691 | 3.39920  | -1.00576 | C | -2.05482 | 0.72852  | 3.17348  |
| H                                         | -6.64752 | 2.14851  | 0.79797  | C | -2.98442 | 0.55740  | 1.97385  |
| H                                         | -5.35666 | 3.82109  | -0.51444 | C | 4.19123  | -2.11831 | -2.27618 |
| H                                         | 3.66760  | 1.26524  | 3.69495  | C | 3.71436  | 0.82910  | -2.73676 |
| H                                         | 1.99953  | 0.63644  | 3.74653  | C | -4.01103 | 3.28810  | -0.64739 |
| H                                         | 3.36840  | -0.45649 | 3.49638  | H | 0.57552  | 2.85832  | -0.56508 |
| H                                         | 3.83409  | 3.34189  | 1.93488  | H | 1.56732  | 1.73325  | 1.95503  |
| H                                         | 2.28400  | 4.18693  | 1.76215  | H | 3.45667  | 2.41383  | 0.35479  |
| H                                         | 2.59685  | 3.21401  | 3.21254  | H | 2.86388  | 2.82927  | -1.27858 |
| H                                         | 0.59277  | -0.49071 | -2.70954 | H | 1.51929  | 0.72293  | -1.06712 |
| H                                         | 0.95703  | -2.04699 | -3.45846 | H | 4.41700  | 0.25234  | -0.76599 |
| H                                         | -1.26777 | -1.02084 | -4.21718 | H | 2.18109  | -1.39418 | -2.04812 |
| H                                         | -1.43281 | -2.64320 | -3.54107 | H | 3.61992  | -1.60850 | 0.56615  |
| H                                         | -1.97701 | -0.01256 | -2.06129 | H | -1.34598 | 2.99718  | 0.06920  |
| H                                         | -3.18415 | -1.18000 | -2.58331 | H | -4.89859 | 1.70095  | 0.59630  |
| C                                         | 2.77892  | -4.04283 | 0.28504  | H | -3.03748 | 3.74203  | -0.84613 |
| H                                         | 3.66967  | -3.92064 | -0.34169 | H | -4.40280 | 2.93085  | -1.60952 |
| H                                         | 3.09425  | -4.37585 | 1.27811  | H | -4.68799 | 4.08360  | -0.30911 |
| H                                         | 2.14628  | -4.81873 | -0.15460 | N | -1.02424 | 1.23687  | -2.33081 |
| H                                         | 1.78816  | -0.10174 | 0.19253  | C | -1.53423 | 0.05409  | -1.70080 |
| O                                         | 3.20936  | -0.33492 | -1.82042 | C | -2.85549 | -0.15835 | -1.63542 |
| C                                         | 4.33823  | 0.22682  | -1.74643 | O | -1.77600 | 2.08393  | -2.77757 |
| O                                         | 4.58109  | 1.32611  | -1.20354 | O | 0.21042  | 1.33855  | -2.39139 |
| H                                         | 5.19486  | -0.30620 | -2.21164 | C | -3.45783 | -1.32459 | -0.99201 |
| H                                         | 2.05124  | 3.32609  | -2.63883 | C | -2.69024 | -2.41158 | -0.53975 |
| H                                         | 2.20969  | 1.52743  | -2.77799 | C | -4.84475 | -1.33598 | -0.78976 |
| H                                         | 0.67597  | 2.35127  | -3.25574 | C | -3.30329 | -3.47476 | 0.11138  |
|                                           |          |          |          | C | -5.45503 | -2.39965 | -0.13089 |
|                                           |          |          |          | C | -4.68450 | -3.46941 | 0.32263  |
|                                           |          |          |          | H | -0.75135 | -0.55536 | -1.26911 |
|                                           |          |          |          | H | -3.52605 | 0.58089  | -2.06801 |
| <b>3a-<math>\gamma</math>-addition-2b</b> |          |          |          |   |          |          |          |
| Geometry with 76 atoms:                   |          |          |          |   |          |          |          |
| C                                         | 1.33214  | 2.92829  | 0.22389  |   |          |          |          |

|                                                |          |          |          |   |          |          |          |
|------------------------------------------------|----------|----------|----------|---|----------|----------|----------|
| H                                              | -1.61402 | -2.43222 | -0.69324 | C | 1.69387  | -2.73704 | 2.14495  |
| H                                              | -5.43910 | -0.49495 | -1.13948 | C | -3.52249 | 1.81642  | 0.36434  |
| H                                              | -2.70098 | -4.31230 | 0.45173  | C | -1.51796 | 0.80415  | 3.36014  |
| H                                              | -6.52934 | -2.39356 | 0.02844  | C | -2.43287 | 0.48157  | 2.18074  |
| H                                              | -5.15923 | -4.30154 | 0.83483  | C | 3.51532  | -2.57590 | -2.47091 |
| H                                              | 4.49887  | 0.30630  | -3.28668 | C | 3.39695  | 0.36532  | -3.03256 |
| H                                              | 2.79349  | 0.79983  | -3.33095 | C | -3.76984 | 3.09263  | -0.40182 |
| H                                              | 4.03810  | 1.86774  | -2.64424 | H | 0.76229  | 2.89193  | -0.62368 |
| H                                              | 5.17811  | -1.99043 | -1.81621 | H | 1.97997  | 1.83301  | 1.84946  |
| H                                              | 3.92811  | -3.17768 | -2.23123 | H | 3.64897  | 2.08157  | -0.01503 |
| H                                              | 4.24586  | -1.82183 | -3.32655 | H | 2.94043  | 2.54226  | -1.58954 |
| H                                              | -0.27772 | -0.18377 | 2.32779  | H | 1.37862  | 0.69120  | -1.29115 |
| H                                              | 0.06402  | 1.08269  | 3.50820  | H | 4.20398  | -0.17262 | -1.08805 |
| H                                              | -2.17253 | -0.10530 | 3.87451  | H | 1.66073  | -1.59903 | -1.99895 |
| H                                              | -2.31302 | 1.64956  | 3.71191  | H | 3.41637  | -1.80778 | 0.40097  |
| H                                              | -2.69975 | -0.36944 | 1.45070  | H | -1.10109 | 2.97092  | 0.13872  |
| H                                              | -4.02778 | 0.44255  | 2.28813  | H | -4.42776 | 1.30511  | 0.68926  |
| C                                              | 1.54896  | 4.39976  | 0.57415  | H | -2.87514 | 3.48005  | -0.89022 |
| H                                              | 2.31492  | 4.49948  | 1.35130  | H | -4.52099 | 2.93863  | -1.18466 |
| H                                              | 1.85906  | 4.97816  | -0.30341 | H | -4.16203 | 3.86295  | 0.27550  |
| H                                              | 0.61756  | 4.82628  | 0.95791  | N | -1.00911 | 1.36514  | -2.20559 |
| H                                              | 2.36475  | 0.42374  | 0.34006  | C | -1.60162 | 0.38572  | -1.46570 |
| O                                              | 3.01879  | 0.41044  | 2.05859  | C | -2.97768 | 0.41295  | -1.20121 |
| C                                              | 4.14812  | -0.07846 | 2.34485  | O | -1.64336 | 2.34239  | -2.63819 |
| O                                              | 4.72698  | -1.00717 | 1.73949  | O | 0.23508  | 1.25447  | -2.47037 |
| H                                              | 4.66737  | 0.35613  | 3.22374  | C | -3.65874 | -0.82190 | -0.74877 |
| H                                              | 2.47541  | -3.51846 | 2.05086  | C | -2.95747 | -1.94430 | -0.28341 |
| H                                              | 2.08389  | -1.82016 | 2.54169  | C | -5.05943 | -0.88513 | -0.80735 |
| H                                              | 0.77847  | -3.05176 | 2.41186  | C | -3.64249 | -3.08938 | 0.11779  |
| <b>3a-<math>\gamma</math>-addition-TS2b-3b</b> |          |          |          | C | -5.74278 | -2.02812 | -0.40709 |
| Geometry with 76 atoms:                        |          |          |          | C | -5.03446 | -3.13644 | 0.06105  |
| C                                              | 1.61850  | 2.89324  | 0.05643  | H | -0.91326 | -0.35068 | -1.07890 |
| N                                              | 1.21904  | 2.23272  | 1.29263  | H | -3.56491 | 1.05871  | -1.85042 |
| C                                              | -0.01974 | 1.86037  | 1.63015  | H | -1.87145 | -1.94077 | -0.23962 |
| C                                              | 2.73521  | 2.09249  | -0.61819 | H | -5.61325 | -0.02214 | -1.17352 |
| N                                              | 2.31255  | 0.68048  | -0.81818 | H | -3.07869 | -3.95092 | 0.46532  |
| C                                              | 3.24476  | -0.18541 | -1.62167 | H | -6.82730 | -2.05760 | -0.46548 |
| C                                              | 2.68880  | -1.62497 | -1.60868 | H | -5.56519 | -4.03270 | 0.36987  |
| N                                              | 2.65626  | -2.14818 | -0.23431 | H | 4.10370  | -0.24972 | -3.59275 |
| C                                              | -0.09097 | 0.98364  | 2.85605  | H | 2.43495  | 0.36728  | -3.55733 |
| C                                              | -1.16791 | 2.23268  | 0.93109  | H | 3.79699  | 1.38155  | -3.03462 |
| C                                              | -2.40145 | 1.59662  | 1.16854  | H | 4.56836  | -2.55396 | -2.16629 |
| S                                              | 1.19725  | -2.32747 | 0.49234  | H | 3.13842  | -3.59111 | -2.32662 |
| O                                              | 0.44922  | -1.05212 | 0.52972  | H | 3.44496  | -2.33020 | -3.53347 |
| O                                              | 0.47265  | -3.44085 | -0.12136 | H | 0.33625  | 0.01492  | 2.56798  |
|                                                |          |          |          | H | 0.56161  | 1.40784  | 3.62828  |

|   |          |          |          |
|---|----------|----------|----------|
| H | -1.54902 | -0.00141 | 4.10058  |
| H | -1.86427 | 1.72003  | 3.85477  |
| H | -2.06927 | -0.43704 | 1.69114  |
| H | -3.46071 | 0.28879  | 2.50387  |
| C | 2.07018  | 4.32711  | 0.31525  |
| H | 2.92786  | 4.34454  | 0.99696  |
| H | 2.35511  | 4.82008  | -0.61978 |
| H | 1.25616  | 4.89680  | 0.77250  |
| H | 2.20057  | 0.26382  | 0.12548  |
| O | 3.12358  | 0.30427  | 1.88518  |
| C | 4.27476  | -0.20250 | 2.00576  |
| O | 4.71612  | -1.18912 | 1.37723  |
| H | 4.95310  | 0.27158  | 2.74561  |
| H | 2.32825  | -3.62458 | 2.11445  |
| H | 2.21822  | -1.87616 | 2.56690  |
| H | 0.77223  | -2.94179 | 2.69598  |

### 3a- $\gamma$ -addition-3b

Geometry with 76 atoms:

|   |          |          |          |
|---|----------|----------|----------|
| C | 1.90522  | 2.71326  | -0.49793 |
| N | 1.60937  | 2.29732  | 0.88000  |
| C | 0.44338  | 2.08948  | 1.43121  |
| C | 2.80238  | 1.65362  | -1.13872 |
| N | 2.10426  | 0.35034  | -1.16868 |
| C | 2.86400  | -0.77691 | -1.79652 |
| C | 2.15094  | -2.09439 | -1.43470 |
| N | 2.23721  | -2.32700 | 0.01717  |
| C | 0.44546  | 1.51152  | 2.82003  |
| C | -0.78667 | 2.31508  | 0.73098  |
| C | -1.92295 | 1.70433  | 1.15121  |
| S | 0.88229  | -2.17332 | 0.92244  |
| O | 0.29289  | -0.81989 | 0.80534  |
| O | -0.04453 | -3.26466 | 0.61897  |
| C | 1.55810  | -2.35902 | 2.55277  |
| C | -3.14538 | 1.72203  | 0.27317  |
| C | -0.94536 | 1.51142  | 3.44292  |
| C | -1.97378 | 0.96439  | 2.45578  |
| C | 2.74668  | -3.29890 | -2.15711 |
| C | 2.96322  | -0.56263 | -3.30190 |
| C | -3.50738 | 3.14214  | -0.18592 |
| H | 0.97199  | 2.75791  | -1.06741 |
| H | 2.42363  | 1.94433  | 1.40799  |
| H | 3.74662  | 1.54463  | -0.59329 |
| H | 3.00859  | 1.96485  | -2.16432 |
| H | 1.16224  | 0.51014  | -1.77115 |
| H | 3.86346  | -0.78743 | -1.34043 |

|   |          |          |          |
|---|----------|----------|----------|
| H | 1.09117  | -1.99919 | -1.71361 |
| H | 3.10329  | -1.96891 | 0.48454  |
| H | -0.78541 | 2.83173  | -0.22517 |
| H | -3.98319 | 1.35246  | 0.87454  |
| H | -2.77254 | 3.53213  | -0.89217 |
| H | -4.48068 | 3.12048  | -0.68883 |
| H | -3.58745 | 3.81849  | 0.67234  |
| N | -0.95814 | 1.25120  | -2.17700 |
| C | -1.68033 | 0.39413  | -1.51125 |
| C | -3.03919 | 0.72020  | -0.96326 |
| O | -1.26850 | 2.48057  | -2.31043 |
| O | 0.17461  | 0.84310  | -2.74009 |
| C | -3.76210 | -0.57042 | -0.61461 |
| C | -3.12014 | -1.59953 | 0.08492  |
| C | -5.11252 | -0.72338 | -0.94211 |
| C | -3.81373 | -2.75483 | 0.44253  |
| C | -5.80931 | -1.87664 | -0.58278 |
| C | -5.16112 | -2.89690 | 0.11235  |
| H | -1.28162 | -0.60979 | -1.47851 |
| H | -3.59769 | 1.22514  | -1.76444 |
| H | -2.06562 | -1.51236 | 0.34084  |
| H | -5.62166 | 0.06723  | -1.49025 |
| H | -3.29161 | -3.54817 | 0.97065  |
| H | -6.85677 | -1.98034 | -0.85334 |
| H | -5.70017 | -3.79953 | 0.38636  |
| H | 3.62343  | -1.31434 | -3.74015 |
| H | 1.97685  | -0.63220 | -3.77298 |
| H | 3.38828  | 0.41492  | -3.54334 |
| H | 3.82416  | -3.36695 | -1.96498 |
| H | 2.27336  | -4.20715 | -1.77629 |
| H | 2.57920  | -3.24694 | -3.23606 |
| H | 0.82815  | 0.48884  | 2.71610  |
| H | 1.16683  | 2.06255  | 3.43344  |
| H | -0.93606 | 0.91329  | 4.35881  |
| H | -1.22752 | 2.53384  | 3.72234  |
| H | -1.78008 | -0.09914 | 2.24507  |
| H | -2.98666 | 1.02232  | 2.86859  |
| C | 2.58261  | 4.07803  | -0.49101 |
| H | 3.51478  | 4.04964  | 0.08444  |
| H | 2.81266  | 4.38635  | -1.51506 |
| H | 1.92054  | 4.82625  | -0.04654 |
| H | 1.84881  | 0.09274  | -0.20257 |
| O | 3.26311  | 0.34616  | 1.69242  |
| C | 4.37979  | -0.24316 | 1.64636  |
| O | 4.59760  | -1.37425 | 1.16204  |
| H | 5.24808  | 0.29535  | 2.08254  |

|                                           |          |          |          |                                                |          |          |          |
|-------------------------------------------|----------|----------|----------|------------------------------------------------|----------|----------|----------|
| H                                         | 2.05359  | -3.32936 | 2.61826  | H                                              | 3.59501  | 2.69735  | -1.87465 |
| H                                         | 2.25620  | -1.53531 | 2.72743  | C                                              | -0.90780 | 2.44766  | 3.34207  |
| H                                         | 0.71090  | -2.31407 | 3.24262  | H                                              | -1.73259 | 3.15965  | 3.22542  |
| <b>3a-<math>\gamma</math>-addition-2c</b> |          |          |          | H                                              | -0.98015 | 1.98453  | 4.33301  |
| Geometry with 76 atoms:                   |          |          |          | H                                              | 0.03231  | 3.00458  | 3.28837  |
| C                                         | -0.95548 | 1.39808  | 2.23140  | H                                              | -2.72311 | 0.35585  | 0.36267  |
| N                                         | -0.82166 | 1.96026  | 0.90865  | H                                              | -4.67828 | 0.32106  | -3.43836 |
| C                                         | 0.36977  | 2.13801  | 0.25658  | H                                              | -3.79825 | 1.50138  | -2.37577 |
| C                                         | -2.25210 | 0.58927  | 2.32484  | H                                              | -3.06551 | 0.94674  | -3.92037 |
| N                                         | -2.40506 | -0.28388 | 1.12418  | N                                              | 0.97544  | -1.51797 | 1.48049  |
| C                                         | -3.36194 | -1.43325 | 1.26748  | C                                              | 2.39658  | -1.63877 | 1.30734  |
| C                                         | -3.60802 | -2.06803 | -0.11752 | C                                              | 2.94348  | -1.36778 | 0.11463  |
| N                                         | -4.02060 | -1.06358 | -1.10929 | O                                              | 0.25469  | -1.33451 | 0.50282  |
| C                                         | 0.20973  | 2.60003  | -1.17193 | O                                              | 0.54287  | -1.60689 | 2.62521  |
| C                                         | 1.59658  | 1.90080  | 0.79607  | C                                              | 4.36503  | -1.44917 | -0.21055 |
| C                                         | 2.84132  | 2.00720  | 0.03236  | C                                              | 5.34843  | -1.76906 | 0.73954  |
| S                                         | -2.88880 | -0.66467 | -2.25125 | C                                              | 4.75333  | -1.19631 | -1.53354 |
| O                                         | -1.65023 | -0.16528 | -1.63445 | C                                              | 6.68398  | -1.84491 | 0.36631  |
| O                                         | -2.73629 | -1.80871 | -3.15183 | C                                              | 6.09263  | -1.27168 | -1.90611 |
| C                                         | -3.70851 | 0.67101  | -3.08073 | C                                              | 7.05926  | -1.59891 | -0.95766 |
| C                                         | 4.03927  | 1.83433  | 0.62951  | H                                              | 2.89594  | -1.92044 | 2.22371  |
| C                                         | 1.49726  | 3.20890  | -1.71526 | H                                              | 2.27116  | -1.06953 | -0.68860 |
| C                                         | 2.68013  | 2.27708  | -1.44894 | H                                              | 5.07336  | -1.95268 | 1.77455  |
| C                                         | -4.67535 | -3.15824 | -0.05383 | H                                              | 3.99539  | -0.94219 | -2.27078 |
| C                                         | -2.81350 | -2.45884 | 2.25184  | H                                              | 7.43797  | -2.09117 | 1.10822  |
| H                                         | -0.12703 | 0.69463  | 2.37621  | H                                              | 6.37936  | -1.07293 | -2.93453 |
| H                                         | -1.67009 | 2.28810  | 0.45077  | H                                              | 8.10536  | -1.65716 | -1.24443 |
| H                                         | -3.13395 | 1.23690  | 2.35362  | O                                              | -3.49308 | 1.99738  | -0.13435 |
| H                                         | -2.23346 | -0.02492 | 3.22516  | C                                              | -4.71109 | 1.98159  | 0.20114  |
| H                                         | -1.47928 | -0.63240 | 0.81817  | O                                              | -5.42856 | 0.96201  | 0.30189  |
| H                                         | -4.29807 | -0.99108 | 1.62806  | H                                              | -5.18143 | 2.96289  | 0.42080  |
| H                                         | -2.66377 | -2.51649 | -0.45802 | C                                              | 5.40118  | 1.89347  | 0.00119  |
| H                                         | -4.54495 | -0.26091 | -0.70793 | H                                              | 5.36744  | 2.02956  | -1.08287 |
| H                                         | 1.68928  | 1.62007  | 1.84453  | H                                              | 5.99560  | 2.71595  | 0.42245  |
| H                                         | -3.56945 | -3.22129 | 2.45039  | H                                              | 5.96252  | 0.96997  | 0.19681  |
| H                                         | -1.92268 | -2.94924 | 1.84310  | H                                              | 4.03289  | 1.61944  | 1.70109  |
| H                                         | -2.54531 | -2.01611 | 3.21338  | <b>3a-<math>\gamma</math>-addition-TS2c-3c</b> |          |          |          |
| H                                         | -5.61177 | -2.75172 | 0.34562  | Geometry with 76 atoms:                        |          |          |          |
| H                                         | -4.86511 | -3.52050 | -1.06711 | C                                              | 0.90554  | -0.99999 | 2.43484  |
| H                                         | -4.36399 | -4.00663 | 0.56145  | N                                              | 0.92553  | -1.79949 | 1.21931  |
| H                                         | -0.09978 | 1.73352  | -1.77218 | C                                              | -0.14096 | -2.14657 | 0.49061  |
| H                                         | -0.61406 | 3.32363  | -1.22449 | C                                              | 1.94439  | 0.13043  | 2.36704  |
| H                                         | 1.39750  | 3.39698  | -2.78999 | N                                              | 2.06467  | 0.71246  | 1.00097  |
| H                                         | 1.68289  | 4.17542  | -1.22927 | C                                              | 2.87870  | 1.97981  | 0.94748  |
| H                                         | 2.49161  | 1.32329  | -1.96817 | C                                              | 3.30707  | 2.24074  | -0.50660 |





|   |          |          |          |   |          |          |          |
|---|----------|----------|----------|---|----------|----------|----------|
| H | 5.01182  | -3.59466 | -0.12322 | C | 0.91348  | 1.99444  | -1.78892 |
| H | 4.41319  | -3.61480 | -1.79171 | N | 0.96920  | 2.26918  | -0.35969 |
| H | 0.14275  | 1.11118  | 2.26203  | C | -0.07924 | 2.26237  | 0.46979  |
| H | 0.55845  | 2.81790  | 2.19652  | C | 1.97109  | 0.95668  | -2.18643 |
| H | -1.38571 | 2.28515  | 3.77081  | N | 2.05184  | -0.16685 | -1.21175 |
| H | -1.76715 | 3.50000  | 2.54415  | C | 2.82901  | -1.35864 | -1.70982 |
| H | -2.41118 | 0.52185  | 2.33997  | C | 3.18083  | -2.26613 | -0.51868 |
| H | -3.60144 | 1.77572  | 2.71125  | N | 3.98108  | -1.53017 | 0.47649  |
| C | 0.76101  | 3.27233  | -2.43692 | C | 0.27429  | 2.26557  | 1.93528  |
| H | 1.59790  | 3.92050  | -2.15381 | C | -1.40425 | 2.20506  | 0.04553  |
| H | 0.78897  | 3.11447  | -3.52121 | C | -2.42699 | 1.79650  | 0.92967  |
| H | -0.17001 | 3.78949  | -2.18652 | S | 3.22450  | -1.24717 | 1.92048  |
| H | 2.67017  | 0.41564  | -0.25045 | O | 1.98162  | -0.48250 | 1.72798  |
| H | 4.86818  | -0.61282 | 3.26870  | O | 3.08760  | -2.52365 | 2.62195  |
| H | 3.92044  | 0.80118  | 2.63562  | C | 4.42211  | -0.22527 | 2.73898  |
| H | 3.27702  | -0.19285 | 3.98846  | C | -3.72308 | 1.54363  | 0.49372  |
| N | -1.09084 | -1.05203 | -1.73032 | C | -0.94766 | 2.44319  | 2.82770  |
| C | -2.50768 | -1.21801 | -1.55632 | C | -2.04951 | 1.49426  | 2.35992  |
| C | -3.01979 | -1.31021 | -0.32158 | C | 3.95271  | -3.50815 | -0.95661 |
| O | -0.34082 | -1.14392 | -0.76216 | C | 2.03554  | -2.10888 | -2.77095 |
| O | -0.69277 | -0.81592 | -2.86662 | H | -0.06235 | 1.55126  | -1.99734 |
| C | -4.43733 | -1.45058 | -0.00021 | H | 1.90716  | 2.36007  | 0.04554  |
| C | -5.44765 | -1.36879 | -0.97173 | H | 2.97176  | 1.39475  | -2.24372 |
| C | -4.79500 | -1.63868 | 1.34213  | H | 1.70072  | 0.55556  | -3.16395 |
| C | -6.78272 | -1.46562 | -0.60150 | H | 1.09438  | -0.46573 | -0.91319 |
| C | -6.13265 | -1.74044 | 1.71092  | H | 3.75698  | -0.94783 | -2.12556 |
| C | -7.12862 | -1.64959 | 0.73978  | H | 2.24022  | -2.58384 | -0.04664 |
| H | -3.03471 | -1.22074 | -2.50002 | H | 4.48810  | -0.70544 | 0.09506  |
| H | -2.32260 | -1.27543 | 0.51428  | H | -1.64554 | 2.35579  | -1.00193 |
| H | -5.19436 | -1.20917 | -2.01645 | H | 2.68517  | -2.83832 | -3.25979 |
| H | -4.01450 | -1.69758 | 2.09695  | H | 1.18507  | -2.63448 | -2.32387 |
| H | -7.55858 | -1.39045 | -1.35782 | H | 1.64483  | -1.44526 | -3.54441 |
| H | -6.39678 | -1.88434 | 2.75437  | H | 4.85456  | -3.22421 | -1.51168 |
| H | -8.17449 | -1.72012 | 1.02476  | H | 4.25920  | -4.06129 | -0.06558 |
| O | 3.44703  | 1.88928  | 0.67685  | H | 3.34263  | -4.16726 | -1.58019 |
| C | 4.62237  | 2.02564  | 0.23350  | H | 0.76255  | 1.30410  | 2.14358  |
| O | 5.32839  | 1.11552  | -0.25429 | H | 1.02547  | 3.04492  | 2.11460  |
| H | 5.06192  | 3.04371  | 0.28643  | H | -0.67752 | 2.23373  | 3.86726  |
| C | -4.39676 | 1.98486  | -1.32053 | H | -1.30985 | 3.47758  | 2.78072  |
| H | -4.02934 | 2.94572  | -1.70504 | H | -1.67061 | 0.46167  | 2.42174  |
| H | -3.91439 | 1.20039  | -1.92505 | H | -2.93441 | 1.55634  | 3.00168  |
| H | -5.47132 | 1.94014  | -1.52069 | C | 1.09319  | 3.26417  | -2.61562 |
| H | -4.96495 | 1.66185  | 0.80660  | H | 2.05319  | 3.73885  | -2.38331 |
|   |          |          |          | H | 1.06654  | 3.03865  | -3.68718 |
|   |          |          |          | H | 0.29381  | 3.97667  | -2.39161 |
|   |          |          |          | H | 2.50816  | 0.22018  | -0.36138 |

**3a**- $\gamma$ -addition-TS2d-3d

Geometry with 76 atoms:

|                                           |          |          |          |   |          |          |          |
|-------------------------------------------|----------|----------|----------|---|----------|----------|----------|
| H                                         | 5.37614  | -0.75445 | 2.76171  | O | 2.35449  | -2.91761 | 2.18698  |
| H                                         | 4.48465  | 0.72415  | 2.20280  | C | 4.06547  | -0.92189 | 2.63004  |
| H                                         | 4.04339  | -0.07045 | 3.75253  | C | -3.26001 | 1.13482  | 0.92029  |
| N                                         | -1.29584 | -0.68283 | -1.38055 | C | -0.24920 | 1.59370  | 3.20427  |
| C                                         | -2.66784 | -0.62411 | -1.29406 | C | -1.21375 | 0.68356  | 2.43672  |
| C                                         | -3.31900 | -0.62649 | -0.06628 | C | 3.28609  | -3.57784 | -1.47153 |
| O                                         | -0.58144 | -0.82937 | -0.35667 | C | 1.70527  | -1.67986 | -3.16134 |
| O                                         | -0.76175 | -0.62716 | -2.51085 | H | 0.00378  | 2.02041  | -1.68599 |
| C                                         | -4.73357 | -1.02904 | 0.06067  | H | 2.24958  | 2.35916  | 0.23262  |
| C                                         | -5.62258 | -1.03754 | -1.02385 | H | 2.98788  | 1.55759  | -2.13450 |
| C                                         | -5.20383 | -1.43995 | 1.31713  | H | 1.58799  | 1.04483  | -3.11832 |
| C                                         | -6.94285 | -1.44526 | -0.85256 | H | 0.82754  | -0.25867 | -1.08325 |
| C                                         | -6.52096 | -1.85273 | 1.48681  | H | 3.52001  | -0.87501 | -2.27605 |
| C                                         | -7.39722 | -1.85522 | 0.40078  | H | 1.66523  | -2.53614 | -0.51554 |
| H                                         | -3.14504 | -0.57934 | -2.26154 | H | 4.17017  | -1.06452 | -0.02568 |
| H                                         | -2.69743 | -0.82576 | 0.80219  | H | -1.44170 | 2.78254  | -0.31852 |
| H                                         | -5.28827 | -0.72588 | -2.00942 | H | 2.27509  | -2.43104 | -3.71357 |
| H                                         | -4.52144 | -1.43564 | 2.16494  | H | 0.75378  | -2.11141 | -2.83529 |
| H                                         | -7.61787 | -1.44659 | -1.70376 | H | 1.47117  | -0.86703 | -3.85134 |
| H                                         | -6.86382 | -2.17584 | 2.46560  | H | 4.24894  | -3.35798 | -1.94812 |
| H                                         | -8.42630 | -2.17817 | 0.52958  | H | 3.46118  | -4.28129 | -0.65386 |
| O                                         | 3.64212  | 1.75839  | 0.27374  | H | 2.62771  | -4.05479 | -2.20257 |
| C                                         | 4.74940  | 1.70256  | -0.33168 | H | 1.72601  | 1.56427  | 2.27251  |
| O                                         | 5.28855  | 0.66612  | -0.77768 | H | 1.11905  | 3.18967  | 2.61989  |
| H                                         | 5.28943  | 2.66212  | -0.47714 | H | 0.23915  | 1.02818  | 4.00261  |
| C                                         | -4.26320 | 2.06532  | -0.80704 | H | -0.82341 | 2.39885  | 3.67577  |
| H                                         | -4.29085 | 3.16317  | -0.81070 | H | -0.66780 | -0.17702 | 2.02428  |
| H                                         | -3.65056 | 1.75654  | -1.66412 | H | -1.99118 | 0.30031  | 3.10547  |
| H                                         | -5.28417 | 1.70894  | -0.97387 | C | 1.31825  | 3.67683  | -2.16783 |
| H                                         | -4.45690 | 1.31730  | 1.26445  | H | 2.34495  | 4.00033  | -1.96282 |
| <b>3a-<math>\gamma</math>-addition-3d</b> |          |          |          | H | 1.18595  | 3.60301  | -3.25161 |
| Geometry with 76 atoms:                   |          |          |          | H | 0.63136  | 4.43855  | -1.78749 |
| C                                         | 1.03659  | 2.32974  | -1.51449 | H | 2.32449  | 0.16509  | -0.41259 |
| N                                         | 1.25596  | 2.40561  | -0.06501 | H | 4.91150  | -1.61085 | 2.61079  |
| C                                         | 0.34855  | 2.31379  | 0.86305  | H | 4.31800  | 0.05456  | 2.20951  |
| C                                         | 1.93962  | 1.24054  | -2.10527 | H | 3.67666  | -0.81723 | 3.64628  |
| N                                         | 1.86555  | -0.01527 | -1.32146 | N | -1.39143 | -0.11915 | -1.55684 |
| C                                         | 2.51878  | -1.20228 | -1.96575 | C | -2.66446 | 0.07552  | -1.32533 |
| C                                         | 2.66804  | -2.30475 | -0.90198 | C | -3.26548 | -0.16940 | 0.02387  |
| N                                         | 3.50344  | -1.82650 | 0.21621  | O | -0.60420 | -0.56367 | -0.61047 |
| C                                         | 0.82662  | 2.18673  | 2.28360  | O | -0.85333 | 0.12798  | -2.69796 |
| C                                         | -1.06383 | 2.28245  | 0.56773  | C | -4.67342 | -0.73811 | -0.03671 |
| C                                         | -1.83564 | 1.43982  | 1.29457  | C | -5.60801 | -0.35355 | -1.00423 |
| S                                         | 2.74347  | -1.60826 | 1.66378  | C | -5.07255 | -1.65553 | 0.94183  |
| O                                         | 1.66234  | -0.61034 | 1.56849  | C | -6.90275 | -0.87179 | -0.99315 |
|                                           |          |          |          | C | -6.36469 | -2.17666 | 0.95698  |



|                                           |          |          |          |                                            |          |          |          |
|-------------------------------------------|----------|----------|----------|--------------------------------------------|----------|----------|----------|
| C                                         | -7.28653 | -1.78491 | -0.01297 | H                                          | 2.98374  | -0.17653 | -2.01771 |
| H                                         | -3.22122 | 0.43064  | -2.18112 | H                                          | 2.82868  | -0.58083 | 0.91022  |
| H                                         | -2.63180 | -0.90336 | 0.53395  | H                                          | -3.56476 | 1.47443  | -1.08944 |
| H                                         | -5.33260 | 0.35750  | -1.77866 | H                                          | 3.46063  | 2.40171  | -2.44318 |
| H                                         | -4.35486 | -1.97162 | 1.69708  | H                                          | 1.79007  | 1.92126  | -2.76158 |
| H                                         | -7.61143 | -0.56026 | -1.75585 | H                                          | 2.14856  | 3.38815  | -1.81927 |
| H                                         | -6.64864 | -2.89359 | 1.72273  | H                                          | 5.01179  | 0.66395  | 0.11485  |
| H                                         | -8.29420 | -2.19089 | -0.00720 | H                                          | 5.27172  | -0.49612 | -1.20353 |
| O                                         | 3.74413  | 1.51011  | 0.46353  | H                                          | 5.07004  | 1.22936  | -1.57030 |
| C                                         | 4.83411  | 1.33922  | -0.15878 | H                                          | -2.16683 | -1.82999 | 0.46004  |
| O                                         | 5.25670  | 0.25627  | -0.60933 | H                                          | -2.22255 | -1.07185 | 2.05430  |
| H                                         | 5.46727  | 2.23862  | -0.31149 | H                                          | -4.18132 | -2.63482 | 1.59466  |
| C                                         | -3.99321 | 2.30047  | 0.26057  | H                                          | -4.65543 | -0.99885 | 2.04648  |
| H                                         | -3.90992 | 3.20562  | 0.87132  | H                                          | -5.75921 | -2.12793 | -0.25406 |
| H                                         | -3.59618 | 2.52277  | -0.73569 | C                                          | -1.97008 | 3.41812  | 0.54246  |
| H                                         | -5.05636 | 2.06669  | 0.15136  | H                                          | -1.70967 | 3.60383  | 1.59036  |
| H                                         | -3.78766 | 0.86721  | 1.84533  | H                                          | -1.73566 | 4.31420  | -0.04334 |
| <b>3a-<math>\gamma'</math>-addition-1</b> |          |          |          | H                                          | -3.04788 | 3.24278  | 0.48868  |
| Geometry with 55 atoms:                   |          |          |          | H                                          | 1.05923  | 0.59733  | 0.54510  |
| C                                         | -1.21075 | 2.19733  | 0.01859  | O                                          | 0.74623  | 0.07820  | 2.16150  |
| N                                         | -1.55868 | 0.97240  | 0.69911  | C                                          | 1.76943  | 0.41147  | 2.83486  |
| C                                         | -2.66339 | 0.22418  | 0.39446  | O                                          | 2.91340  | 0.58260  | 2.36948  |
| C                                         | 0.29251  | 2.44032  | 0.13140  | H                                          | 1.61956  | 0.55397  | 3.92357  |
| N                                         | 1.06442  | 1.23605  | -0.29714 | H                                          | 2.42436  | -3.28419 | 1.31990  |
| C                                         | 2.47215  | 1.50022  | -0.74948 | H                                          | 1.01272  | -2.19439 | 1.64900  |
| C                                         | 3.23587  | 0.17453  | -1.00807 | H                                          | 0.79540  | -3.70352 | 0.69204  |
| N                                         | 2.89655  | -0.89851 | -0.07052 | H                                          | -4.81537 | -0.14709 | -2.98672 |
| C                                         | -2.73069 | -1.11961 | 1.08408  | H                                          | -6.25208 | -0.89088 | -2.25284 |
| C                                         | -3.60827 | 0.54349  | -0.52919 | H                                          | -5.94602 | 0.84731  | -2.06666 |
| C                                         | -4.68397 | -0.40292 | -0.84894 | <b>3a-<math>\gamma'</math>-addition-2a</b> |          |          |          |
| S                                         | 1.78576  | -2.02055 | -0.57072 | Geometry with 73 atoms:                    |          |          |          |
| O                                         | 0.53577  | -1.37884 | -1.01804 | C                                          | 1.06758  | -2.90376 | -0.54415 |
| O                                         | 2.42988  | -2.89660 | -1.54677 | N                                          | 0.31702  | -1.86235 | -1.21250 |
| C                                         | 1.47876  | -2.88885 | 0.94465  | C                                          | -1.05129 | -1.78681 | -1.20055 |
| C                                         | -5.46927 | -0.14073 | -2.10579 | C                                          | 2.45740  | -2.37229 | -0.18144 |
| C                                         | -4.17320 | -1.59454 | 1.25331  | N                                          | 2.34699  | -0.98686 | 0.36641  |
| C                                         | -4.94935 | -1.43684 | -0.02991 | C                                          | 3.50289  | -0.51562 | 1.20240  |
| C                                         | 4.74176  | 0.41540  | -0.91723 | C                                          | 3.38615  | 1.00590  | 1.41958  |
| C                                         | 2.45877  | 2.35834  | -2.00984 | N                                          | 3.27355  | 1.72371  | 0.13852  |
| H                                         | -1.44667 | 2.06021  | -1.04881 | C                                          | -1.61025 | -0.55097 | -1.87002 |
| H                                         | -0.96540 | 0.65733  | 1.46377  | C                                          | -1.88363 | -2.63663 | -0.54058 |
| H                                         | 0.58760  | 2.64514  | 1.16657  | C                                          | -3.31872 | -2.35130 | -0.44374 |
| H                                         | 0.57015  | 3.29347  | -0.48753 | S                                          | 1.79858  | 2.38504  | -0.19305 |
| H                                         | 0.55428  | 0.69987  | -1.01444 | O                                          | 0.73629  | 1.35928  | -0.20067 |
| H                                         | 2.94832  | 2.01949  | 0.08967  | O                                          | 1.57467  | 3.50512  | 0.72141  |



|   |          |          |          |   |          |          |          |
|---|----------|----------|----------|---|----------|----------|----------|
| C | -1.59529 | -0.22473 | 1.22798  | C | 1.31597  | -2.94501 | -0.38635 |
| C | -2.95334 | -0.02985 | 1.02041  | N | 0.54677  | -2.02983 | -1.23844 |
| O | -1.96538 | -2.12472 | 2.42651  | C | -0.75970 | -1.92626 | -1.25895 |
| O | 0.08594  | -1.46578 | 2.12420  | C | 2.53482  | -2.20390 | 0.17291  |
| C | -3.48305 | 1.25881  | 0.53287  | N | 2.16237  | -0.85568 | 0.67156  |
| C | -2.65990 | 2.25054  | -0.02185 | C | 3.19868  | -0.21592 | 1.55027  |
| C | -4.85991 | 1.50490  | 0.63086  | C | 2.95189  | 1.30107  | 1.58234  |
| C | -3.20627 | 3.45224  | -0.46391 | N | 3.06638  | 1.86002  | 0.21910  |
| C | -5.40504 | 2.70569  | 0.18639  | C | -1.33835 | -0.75634 | -2.01123 |
| C | -4.57832 | 3.68430  | -0.36618 | C | -1.61305 | -2.89292 | -0.63485 |
| H | -0.79791 | 0.40820  | 0.86530  | C | -2.88334 | -2.55985 | -0.28227 |
| H | -3.62580 | -0.61622 | 1.64004  | S | 1.67890  | 2.47423  | -0.42746 |
| H | -1.58678 | 2.09439  | -0.10245 | O | 0.64616  | 1.42772  | -0.57131 |
| H | -5.50607 | 0.74360  | 1.06361  | O | 1.28150  | 3.64698  | 0.34834  |
| H | -2.55248 | 4.21303  | -0.88159 | C | 2.23094  | 2.95195  | -2.04308 |
| H | -6.47385 | 2.87932  | 0.27470  | C | -3.79992 | -3.52010 | 0.39598  |
| H | -4.99930 | 4.62370  | -0.71314 | C | -2.86250 | -0.69694 | -1.90847 |
| H | 4.23773  | -0.86021 | 3.29382  | C | -3.38018 | -1.17073 | -0.54527 |
| H | 2.45947  | -0.80860 | 3.30888  | C | 3.93202  | 2.02138  | 2.50219  |
| H | 3.31480  | -2.18734 | 2.60267  | C | 3.14323  | -0.83424 | 2.94203  |
| H | 5.24343  | 1.54625  | 2.01427  | H | 0.67398  | -3.21048 | 0.45892  |
| H | 4.11231  | 2.84279  | 2.44532  | H | 1.10685  | -1.36348 | -1.79747 |
| H | 4.20489  | 1.38905  | 3.45571  | H | 3.31839  | -2.07842 | -0.57898 |
| H | -1.01948 | 0.24611  | -1.42667 | H | 2.93580  | -2.78899 | 1.00269  |
| H | -1.05548 | -0.59954 | -2.95426 | H | 1.22746  | -0.92878 | 1.23568  |
| H | -3.31356 | 0.45669  | -2.01914 | H | 4.16828  | -0.40418 | 1.07139  |
| H | -3.34171 | -1.09074 | -2.85155 | H | 1.92993  | 1.47131  | 1.95106  |
| H | -4.67143 | -1.10944 | -0.60965 | H | 3.59987  | 1.26658  | -0.45201 |
| C | 1.57432  | -4.16665 | -1.39420 | H | -1.21090 | -3.86210 | -0.35598 |
| H | 2.13564  | -3.88611 | -2.29231 | N | -1.13675 | -1.22810 | 1.84640  |
| H | 2.17071  | -4.88215 | -0.81741 | C | -1.56173 | -0.26148 | 1.06081  |
| H | 0.65019  | -4.66107 | -1.70796 | C | -3.00370 | -0.21991 | 0.67347  |
| H | 2.12366  | -0.29213 | -0.31857 | O | -1.90325 | -2.15161 | 2.25024  |
| O | 2.41606  | -0.17023 | -2.29859 | O | 0.12208  | -1.26718 | 2.22555  |
| C | 3.66419  | -0.16502 | -2.48512 | C | -3.51127 | 1.18126  | 0.38268  |
| O | 4.52506  | 0.22083  | -1.66173 | C | -2.69463 | 2.18829  | -0.14303 |
| H | 4.02812  | -0.53386 | -3.46685 | C | -4.86303 | 1.46791  | 0.60456  |
| H | 2.98750  | 3.69317  | -1.80664 | C | -3.21847 | 3.44797  | -0.43383 |
| H | 2.28702  | 2.16643  | -2.49623 | C | -5.38992 | 2.72395  | 0.31122  |
| H | 1.23775  | 3.59444  | -2.20317 | C | -4.56665 | 3.72114  | -0.21098 |
| H | -3.26299 | -4.08648 | 1.09804  | H | -0.83203 | 0.49355  | 0.80484  |
| H | -4.57507 | -2.89740 | 1.14147  | H | -3.57205 | -0.62090 | 1.52269  |
| H | -4.49113 | -4.06164 | -0.18565 | H | -1.63784 | 2.00644  | -0.32301 |
|   |          |          |          | H | -5.50912 | 0.69765  | 1.02274  |
|   |          |          |          | H | -2.56225 | 4.21885  | -0.82910 |
|   |          |          |          | H | -6.44074 | 2.92626  | 0.50040  |

**3a- $\gamma'$ -addition-3a**

Geometry with 73 atoms:

|                                            |          |          |          |   |          |          |          |
|--------------------------------------------|----------|----------|----------|---|----------|----------|----------|
| H                                          | -4.97132 | 4.70468  | -0.43317 | C | 2.08769  | 1.31502  | -2.79963 |
| H                                          | 4.01846  | -0.53077 | 3.52082  | C | 3.29027  | 1.44581  | -1.90267 |
| H                                          | 2.23582  | -0.52391 | 3.46995  | C | -4.44267 | -2.76257 | 1.69596  |
| H                                          | 3.14526  | -1.92686 | 2.89913  | C | -2.43733 | -1.01526 | 3.17695  |
| H                                          | 4.96579  | 1.79032  | 2.21943  | H | -0.07508 | 2.39926  | 1.63335  |
| H                                          | 3.78195  | 3.09920  | 2.40372  | H | -1.33629 | 1.74523  | -0.94908 |
| H                                          | 3.77830  | 1.74537  | 3.54907  | H | -3.06572 | 2.18400  | 1.51930  |
| H                                          | -0.86626 | 0.15142  | -1.61950 | H | -1.90417 | 1.62081  | 2.73896  |
| H                                          | -1.02233 | -0.83919 | -3.05914 | H | -1.31275 | -0.10015 | 0.93371  |
| H                                          | -3.20322 | 0.32280  | -2.11028 | H | -4.04229 | -0.04939 | 2.06847  |
| H                                          | -3.30744 | -1.34293 | -2.67409 | H | -2.51301 | -2.38743 | 0.82843  |
| H                                          | -4.47689 | -1.18722 | -0.57578 | H | -4.47712 | -0.51390 | -0.29248 |
| C                                          | 1.74788  | -4.18598 | -1.15858 | H | 1.75870  | 2.81544  | 0.80352  |
| H                                          | 2.34465  | -3.90345 | -2.03254 | H | -3.14234 | -1.55962 | 3.80918  |
| H                                          | 2.35016  | -4.84160 | -0.52158 | H | -1.57703 | -1.66403 | 2.97659  |
| H                                          | 0.87482  | -4.74757 | -1.50368 | H | -2.08625 | -0.15378 | 3.74915  |
| H                                          | 1.99043  | -0.25905 | -0.15568 | H | -5.36301 | -2.21936 | 1.94030  |
| O                                          | 2.45925  | -0.33969 | -2.28202 | H | -4.69663 | -3.57730 | 1.01359  |
| C                                          | 3.71828  | -0.31580 | -2.37065 | H | -4.03177 | -3.19570 | 2.61219  |
| O                                          | 4.50609  | 0.14894  | -1.51762 | H | 0.87403  | -0.10058 | -1.67256 |
| H                                          | 4.16390  | -0.74356 | -3.29350 | H | -0.06308 | 1.03941  | -2.61383 |
| H                                          | 3.07393  | 3.63638  | -1.93628 | H | 2.25409  | 0.56793  | -3.58300 |
| H                                          | 2.49632  | 2.04879  | -2.59643 | H | 1.91645  | 2.27518  | -3.31421 |
| H                                          | 1.38323  | 3.45347  | -2.51680 | H | 4.28080  | 1.21925  | -2.29363 |
| H                                          | -3.29179 | -4.44620 | 0.67423  | C | -1.33475 | 3.95474  | 0.83477  |
| H                                          | -4.20763 | -3.05834 | 1.30188  | H | -2.18741 | 4.04749  | 0.15265  |
| H                                          | -4.64400 | -3.75654 | -0.26550 | H | -1.61021 | 4.39166  | 1.80222  |
| <b>3a-<math>\gamma'</math>-addition-2b</b> |          |          |          | H | -0.49562 | 4.52477  | 0.42382  |
| Geometry with 73 atoms:                    |          |          |          | H | -2.63431 | 0.48443  | 0.14555  |
| C                                          | -0.95048 | 2.48418  | 0.98463  | H | -4.93862 | -1.43505 | -2.91598 |
| N                                          | -0.58371 | 1.86683  | -0.27388 | H | -4.01892 | 0.11905  | -2.73322 |
| C                                          | 0.69755  | 1.78449  | -0.74672 | H | -3.41667 | -1.16692 | -3.83203 |
| C                                          | -2.09768 | 1.69767  | 1.66870  | N | 1.08307  | -0.44807 | 1.59449  |
| N                                          | -2.24019 | 0.32876  | 1.09912  | C | 2.51526  | -0.55474 | 1.55231  |
| C                                          | -3.11785 | -0.60672 | 1.87708  | C | 3.10851  | -1.11152 | 0.48734  |
| C                                          | -3.44679 | -1.83491 | 1.00482  | O | 0.39953  | -1.00603 | 0.74069  |
| N                                          | -3.99627 | -1.43484 | -0.30186 | O | 0.59292  | 0.20187  | 2.51548  |
| C                                          | 0.83925  | 0.95094  | -1.99904 | C | 4.54970  | -1.26260 | 0.29701  |
| C                                          | 1.81650  | 2.25165  | -0.12479 | C | 5.48336  | -1.00968 | 1.31414  |
| C                                          | 3.14599  | 1.93885  | -0.65705 | C | 5.01033  | -1.66409 | -0.96555 |
| S                                          | -2.98833 | -1.66781 | -1.59978 | C | 6.84424  | -1.14140 | 1.06507  |
| O                                          | -1.73592 | -0.91024 | -1.46229 | C | 6.37278  | -1.79197 | -1.21491 |
| O                                          | -2.84779 | -3.11128 | -1.79554 | C | 7.29212  | -1.52772 | -0.20017 |
| C                                          | -3.95741 | -0.95776 | -2.90551 | H | 2.98004  | -0.10259 | 2.41765  |
| C                                          | 4.32227  | 2.20918  | 0.23990  | H | 2.46568  | -1.46476 | -0.31679 |
|                                            |          |          |          | H | 5.14818  | -0.71747 | 2.30559  |

|   |          |          |          |
|---|----------|----------|----------|
| H | 4.28831  | -1.85806 | -1.75550 |
| H | 7.55948  | -0.94554 | 1.85848  |
| H | 6.71672  | -2.09741 | -2.19861 |
| H | 8.35678  | -1.62780 | -0.39144 |
| O | -3.34305 | 1.69544  | -1.10153 |
| C | -4.51409 | 1.90983  | -0.68487 |
| O | -5.18908 | 1.13767  | 0.03481  |
| H | -4.98562 | 2.86900  | -0.98614 |
| H | 4.20783  | 1.70294  | 1.20762  |
| H | 5.26119  | 1.87608  | -0.21372 |
| H | 4.40519  | 3.28288  | 0.45383  |

**3a- $\gamma'$ -addition-TS2b-3b**

Geometry with 73 atoms:

|   |          |          |          |
|---|----------|----------|----------|
| C | -1.02548 | 2.66489  | 0.48844  |
| N | -0.63381 | 1.86762  | -0.67224 |
| C | 0.61698  | 1.66327  | -1.08220 |
| C | -2.06134 | 1.91459  | 1.36678  |
| N | -2.12760 | 0.46162  | 1.06221  |
| C | -2.95275 | -0.36099 | 2.00847  |
| C | -3.22723 | -1.72051 | 1.33892  |
| N | -3.90256 | -1.52860 | 0.04097  |
| C | 0.78939  | 0.49970  | -2.02325 |
| C | 1.71756  | 2.37551  | -0.59370 |
| C | 3.02758  | 1.94363  | -0.85279 |
| S | -3.01407 | -1.91619 | -1.30300 |
| O | -1.80517 | -1.08472 | -1.42168 |
| O | -2.79877 | -3.36302 | -1.29631 |
| C | -4.14781 | -1.46290 | -2.59116 |
| C | 4.15239  | 2.63372  | -0.14215 |
| C | 2.21276  | 0.32584  | -2.55314 |
| C | 3.26184  | 0.76680  | -1.56408 |
| C | -4.08272 | -2.62684 | 2.21848  |
| C | -2.23565 | -0.51825 | 3.34186  |
| H | -0.12466 | 2.77174  | 1.09518  |
| H | -1.39014 | 1.42183  | -1.19795 |
| H | -3.07076 | 2.30445  | 1.21253  |
| H | -1.78469 | 2.03827  | 2.41391  |
| H | -1.17077 | 0.04042  | 0.99129  |
| H | -3.90170 | 0.17644  | 2.12485  |
| H | -2.25910 | -2.20955 | 1.15936  |
| H | -4.41491 | -0.62651 | -0.04454 |
| H | 1.56923  | 3.23195  | 0.05714  |
| H | -2.91265 | -0.96660 | 4.07270  |
| H | -1.35193 | -1.15598 | 3.23405  |
| H | -1.90401 | 0.44155  | 3.74423  |

|   |          |          |          |
|---|----------|----------|----------|
| H | -5.01947 | -2.12551 | 2.48919  |
| H | -4.32767 | -3.53238 | 1.65822  |
| H | -3.55674 | -2.91700 | 3.13227  |
| H | 0.47840  | -0.37764 | -1.44034 |
| H | 0.06687  | 0.58334  | -2.84292 |
| H | 2.36531  | -0.71781 | -2.85086 |
| H | 2.34659  | 0.92888  | -3.46324 |
| H | 4.29282  | 0.53389  | -1.81795 |
| C | -1.55780 | 4.03461  | 0.08153  |
| H | -2.42595 | 3.91639  | -0.57496 |
| H | -1.85751 | 4.60758  | 0.96613  |
| H | -0.78789 | 4.60055  | -0.45219 |
| H | -2.54365 | 0.39969  | 0.11385  |
| H | -5.09043 | -1.98934 | -2.43417 |
| H | -4.27008 | -0.37768 | -2.57117 |
| H | -3.68089 | -1.77531 | -3.52870 |
| N | 1.13694  | -0.01034 | 1.44615  |
| C | 2.48763  | 0.01679  | 1.27083  |
| C | 3.11073  | -0.58458 | 0.16737  |
| O | 0.40145  | -0.75471 | 0.73526  |
| O | 0.60717  | 0.68826  | 2.34923  |
| C | 4.53494  | -0.98591 | 0.22115  |
| C | 5.44681  | -0.44316 | 1.13736  |
| C | 4.99448  | -1.95472 | -0.68365 |
| C | 6.77802  | -0.85301 | 1.14007  |
| C | 6.32276  | -2.36808 | -0.67810 |
| C | 7.22270  | -1.81492 | 0.23353  |
| H | 2.99065  | 0.62799  | 2.00666  |
| H | 2.47179  | -1.23998 | -0.42092 |
| H | 5.12177  | 0.29785  | 1.86209  |
| H | 4.29459  | -2.38722 | -1.39585 |
| H | 7.46970  | -0.42336 | 1.85934  |
| H | 6.65599  | -3.12454 | -1.38309 |
| H | 8.26039  | -2.13565 | 0.24165  |
| O | -3.37345 | 1.50224  | -1.29436 |
| C | -4.53982 | 1.71100  | -0.86635 |
| O | -5.14598 | 1.02584  | -0.00913 |
| H | -5.07974 | 2.58458  | -1.29031 |
| H | 4.06518  | 2.46045  | 0.94079  |
| H | 5.12937  | 2.27360  | -0.47331 |
| H | 4.10319  | 3.71766  | -0.29412 |

**3a- $\gamma'$ -addition-3b**

Geometry with 73 atoms:

|   |          |         |          |
|---|----------|---------|----------|
| C | -1.57734 | 2.94554 | 0.16329  |
| N | -0.98879 | 2.23806 | -0.98265 |





|   |          |          |          |
|---|----------|----------|----------|
| H | -3.72980 | -1.73855 | -1.91184 |
| H | -4.50999 | 0.51858  | -0.00310 |
| C | 0.27081  | 0.84972  | 3.09149  |
| C | 2.30706  | 1.29758  | 1.71945  |
| H | -0.47482 | 1.51608  | 3.54262  |
| H | -0.28212 | 0.01872  | 2.62580  |
| C | 3.04884  | 0.23968  | 2.39067  |
| C | 4.29447  | -0.09911 | 1.99359  |
| C | 2.33826  | -0.52043 | 3.49295  |
| H | -3.30181 | -4.17440 | 1.75288  |
| C | 1.23480  | 0.31205  | 4.14621  |
| H | 3.05998  | -0.84900 | 4.24922  |
| H | 1.68279  | 1.15552  | 4.68667  |
| H | 2.83085  | 1.83177  | 0.92939  |
| H | 0.69010  | -0.29315 | 4.87939  |
| H | -0.75210 | 2.47529  | 1.48226  |
| H | 1.89174  | -1.42981 | 3.06365  |
| C | 5.11579  | -1.21681 | 2.57950  |
| H | 5.94541  | -1.47671 | 1.91421  |
| H | 5.55728  | -0.94617 | 3.54962  |
| H | 4.52367  | -2.12665 | 2.74218  |
| H | 4.74992  | 0.47482  | 1.18580  |
| C | 4.08643  | -1.31583 | -1.26268 |
| C | 5.11244  | -2.23668 | -1.00843 |
| C | 4.30251  | -0.30517 | -2.21353 |
| C | 6.32508  | -2.15584 | -1.68748 |
| H | 4.95231  | -3.01748 | -0.26836 |
| C | 5.51354  | -0.22465 | -2.88973 |
| H | 3.52434  | 0.42297  | -2.42547 |
| C | 6.52839  | -1.14871 | -2.62955 |
| H | 7.11032  | -2.87729 | -1.48104 |
| H | 5.66848  | 0.56115  | -3.62325 |
| H | 7.47373  | -1.08149 | -3.16038 |
| C | -5.16568 | 0.50767  | -2.05691 |
| H | -4.77652 | 0.22823  | -3.04275 |
| H | -6.12255 | -0.00222 | -1.90425 |
| H | -5.34720 | 1.58609  | -2.05038 |
| H | -4.81691 | -0.78002 | 2.01112  |
| C | -0.14291 | 4.35522  | -1.97651 |
| H | 0.32212  | 5.31085  | -1.72158 |
| H | 0.55831  | 3.78321  | -2.59775 |
| H | -1.03716 | 4.55853  | -2.57233 |
| C | 1.60099  | 4.35183  | 0.43062  |
| H | 2.15320  | 4.69408  | -0.45031 |
| H | 1.00204  | 5.18497  | 0.81791  |
| H | 2.32689  | 4.07673  | 1.20117  |

|   |          |          |          |
|---|----------|----------|----------|
| H | -1.92405 | -1.35060 | -0.62047 |
| O | -1.06458 | -1.75572 | -2.23592 |
| C | -0.48370 | -0.92557 | -2.97735 |
| O | -0.74989 | 0.29631  | -3.10577 |
| H | 0.35659  | -1.31619 | -3.59388 |

### 3b- $\gamma$ -addition-TS2a-3a

Geometry with 88 atoms:

|   |          |          |          |
|---|----------|----------|----------|
| C | 3.00230  | -1.20157 | 0.00453  |
| C | 1.84342  | -0.55637 | -0.42245 |
| N | 0.67954  | -0.70715 | 0.28417  |
| O | -0.34614 | -0.07382 | -0.08685 |
| O | 0.62397  | -1.47953 | 1.27037  |
| H | 2.86786  | -2.03476 | 0.68997  |
| H | 1.74631  | 0.09569  | -1.28041 |
| C | -4.18297 | -0.01605 | -0.69144 |
| C | -3.82020 | -1.50580 | -0.68996 |
| N | -3.03138 | 0.73865  | -1.14523 |
| C | -4.89277 | -2.40693 | -0.04761 |
| C | -4.19654 | -3.50367 | 0.77290  |
| C | -3.09416 | -4.13890 | -0.08908 |
| C | -1.98438 | -3.09401 | -0.31648 |
| N | -2.52713 | -1.74377 | 0.04501  |
| C | -2.70040 | -1.64982 | 1.52935  |
| C | -3.54390 | -2.84967 | 2.00033  |
| H | -2.48353 | 0.29163  | -1.90332 |
| C | -2.57141 | 1.89244  | -0.62188 |
| S | -3.31477 | 2.65632  | 0.72940  |
| N | -1.48460 | 2.37277  | -1.23853 |
| H | -1.02775 | 1.75644  | -1.93858 |
| C | -0.75506 | 3.58486  | -0.91260 |
| C | 0.49496  | 3.24289  | -0.08191 |
| N | 0.06539  | 2.62309  | 1.17009  |
| C | 0.81820  | 1.82706  | 1.92045  |
| H | -2.91414 | -3.57896 | 2.52166  |
| H | -3.51146 | -4.46997 | -1.04636 |
| H | 1.06440  | 2.48750  | -0.64432 |
| H | -1.41282 | 4.22268  | -0.31242 |
| H | -3.17041 | -0.68644 | 1.74088  |
| H | -1.69254 | -1.63769 | 1.94869  |
| H | -1.65231 | -3.02038 | -1.35398 |
| H | -1.11454 | -3.25145 | 0.32698  |
| H | -4.92110 | -4.26039 | 1.08591  |
| H | -5.52149 | -2.84276 | -0.83011 |
| H | -5.54505 | -1.81269 | 0.60578  |
| H | -3.60447 | -1.81331 | -1.71906 |



|   |          |          |          |                                           |          |          |          |
|---|----------|----------|----------|-------------------------------------------|----------|----------|----------|
| H | -4.42082 | 0.31277  | 0.32494  | O                                         | -1.52713 | -1.04393 | -2.70074 |
| C | 0.14186  | 1.13396  | 3.06786  | C                                         | -0.43060 | -0.53247 | -3.05598 |
| C | 2.15050  | 1.52845  | 1.62569  | O                                         | -0.12881 | 0.68201  | -3.07485 |
| H | -0.65334 | 1.77126  | 3.47024  | H                                         | 0.35354  | -1.24665 | -3.39656 |
| H | -0.33345 | 0.23521  | 2.64552  |                                           |          |          |          |
| C | 2.83896  | 0.49177  | 2.28056  | <b>3b-<math>\gamma</math>-addition-3a</b> |          |          |          |
| C | 3.96069  | -0.06089 | 1.65829  | Geometry with 88 atoms:                   |          |          |          |
| C | 2.27924  | -0.10725 | 3.55180  | C                                         | 3.28615  | -0.62344 | 0.30761  |
| H | -2.67558 | -5.01933 | 0.40808  | C                                         | 2.01765  | -0.38726 | -0.44905 |
| C | 1.15191  | 0.74074  | 4.14326  | N                                         | 0.86442  | -0.48444 | 0.16705  |
| H | 3.08908  | -0.21504 | 4.28466  | O                                         | -0.23655 | -0.10835 | -0.41242 |
| H | 1.57204  | 1.65088  | 4.58933  | O                                         | 0.78862  | -0.91624 | 1.37722  |
| H | 2.62755  | 1.99069  | 0.76671  | H                                         | 3.09698  | -1.40013 | 1.05774  |
| H | 0.64827  | 0.19036  | 4.94430  | H                                         | 1.97623  | -0.03266 | -1.47094 |
| H | -0.93383 | 2.67607  | 1.38645  | C                                         | -4.09056 | -0.72063 | -0.31906 |
| H | 1.91393  | -1.11887 | 3.33321  | C                                         | -3.36983 | -2.07180 | -0.30938 |
| C | 4.82411  | -1.09267 | 2.33038  | N                                         | -3.22334 | 0.23441  | -0.98066 |
| H | 5.54741  | -1.51510 | 1.62632  | C                                         | -4.14165 | -3.19929 | 0.40236  |
| H | 5.39727  | -0.65733 | 3.16100  | C                                         | -3.13277 | -4.10995 | 1.12038  |
| H | 4.22951  | -1.91726 | 2.74257  | C                                         | -1.97573 | -4.42413 | 0.15901  |
| H | 4.44856  | 0.56436  | 0.91205  | C                                         | -1.17834 | -3.12821 | -0.08415 |
| C | 4.16503  | -1.27941 | -0.90374 | N                                         | -2.01844 | -1.96266 | 0.34451  |
| C | 4.99654  | -2.40694 | -0.87574 | C                                         | -2.13323 | -1.94057 | 1.83656  |
| C | 4.46256  | -0.24898 | -1.80889 | C                                         | -2.56938 | -3.33652 | 2.32111  |
| C | 6.08932  | -2.50882 | -1.73478 | H                                         | -2.72274 | -0.14477 | -1.81079 |
| H | 4.77439  | -3.21429 | -0.18127 | C                                         | -2.94163 | 1.48303  | -0.58034 |
| C | 5.55213  | -0.35053 | -2.66659 | S                                         | -3.63405 | 2.18571  | 0.83679  |
| H | 3.83916  | 0.64162  | -1.83911 | N                                         | -2.07623 | 2.12595  | -1.37587 |
| C | 6.37060  | -1.48161 | -2.63341 | H                                         | -1.63598 | 1.57322  | -2.14070 |
| H | 6.71835  | -3.39413 | -1.70398 | C                                         | -1.56474 | 3.47272  | -1.21919 |
| H | 5.76438  | 0.45536  | -3.36354 | C                                         | -0.20620 | 3.43225  | -0.49579 |
| H | 7.22107  | -1.55918 | -3.30470 | N                                         | -0.43369 | 2.89195  | 0.85523  |
| C | -5.39411 | 0.22715  | -1.59188 | C                                         | 0.45018  | 2.31288  | 1.61548  |
| H | -5.16584 | -0.06391 | -2.62364 | H                                         | -1.71830 | -3.87699 | 2.75113  |
| H | -6.27048 | -0.33537 | -1.25221 | H                                         | -2.36782 | -4.81846 | -0.78497 |
| H | -5.64515 | 1.29150  | -1.58124 | H                                         | 0.42582  | 2.71299  | -1.03193 |
| H | -4.30772 | -2.51031 | 2.70665  | H                                         | -2.27509 | 4.04410  | -0.61031 |
| C | -0.39087 | 4.29611  | -2.21393 | H                                         | -2.85812 | -1.16332 | 2.09085  |
| H | 0.06042  | 5.27345  | -2.02393 | H                                         | -1.15320 | -1.63799 | 2.20645  |
| H | 0.30881  | 3.69311  | -2.80512 | H                                         | -0.93591 | -2.95532 | -1.13589 |
| H | -1.29561 | 4.44630  | -2.80954 | H                                         | -0.26195 | -3.07226 | 0.50935  |
| C | 1.36433  | 4.46955  | 0.19911  | H                                         | -3.61889 | -5.03230 | 1.45059  |
| H | 1.88532  | 4.79848  | -0.70448 | H                                         | -4.72591 | -3.75947 | -0.33443 |
| H | 0.74714  | 5.29675  | 0.56963  | H                                         | -4.84786 | -2.78105 | 1.13244  |
| H | 2.11763  | 4.24562  | 0.96002  | H                                         | -3.14882 | -2.34523 | -1.34634 |
| H | -1.81632 | -1.03201 | -0.23290 | H                                         | -4.26299 | -0.37227 | 0.70400  |

|   |          |          |          |
|---|----------|----------|----------|
| C | 0.00163  | 1.71960  | 2.91646  |
| C | 1.80336  | 2.10404  | 1.18250  |
| H | -0.83239 | 2.29768  | 3.32644  |
| H | -0.36525 | 0.71456  | 2.66216  |
| C | 2.62339  | 1.26116  | 1.86459  |
| C | 3.78251  | 0.65951  | 1.11708  |
| C | 2.33277  | 0.83827  | 3.27496  |
| H | -1.31825 | -5.18801 | 0.58590  |
| C | 1.17273  | 1.62014  | 3.89118  |
| H | 3.23950  | 0.97171  | 3.87822  |
| H | 1.51182  | 2.63008  | 4.15461  |
| H | 2.08950  | 2.42984  | 0.18792  |
| H | 0.84343  | 1.13800  | 4.81606  |
| H | -1.41802 | 2.86524  | 1.16572  |
| H | 2.11712  | -0.23852 | 3.25638  |
| C | 4.97913  | 0.30267  | 1.99664  |
| H | 5.82507  | -0.01211 | 1.37919  |
| H | 5.30212  | 1.16213  | 2.59430  |
| H | 4.73956  | -0.52021 | 2.68037  |
| H | 4.09655  | 1.38942  | 0.35900  |
| C | 4.39488  | -1.09268 | -0.61446 |
| C | 5.06450  | -2.29337 | -0.36589 |
| C | 4.78052  | -0.32984 | -1.72316 |
| C | 6.09423  | -2.72579 | -1.20175 |
| H | 4.77440  | -2.89564 | 0.49248  |
| C | 5.80661  | -0.75821 | -2.56215 |
| H | 4.27046  | 0.60745  | -1.93958 |
| C | 6.46882  | -1.95858 | -2.30299 |
| H | 6.60198  | -3.66341 | -0.99218 |
| H | 6.08700  | -0.15606 | -3.42201 |
| H | 7.26866  | -2.29368 | -2.95730 |
| C | -5.42997 | -0.83560 | -1.04684 |
| H | -5.27499 | -1.17398 | -2.07793 |
| H | -6.10529 | -1.53541 | -0.54354 |
| H | -5.91226 | 0.14566  | -1.07536 |
| H | -3.32594 | -3.23565 | 3.10579  |
| C | -1.43994 | 4.10823  | -2.60188 |
| H | -1.17151 | 5.16574  | -2.53349 |
| H | -0.68569 | 3.58666  | -3.20253 |
| H | -2.39866 | 4.02961  | -3.12142 |
| C | 0.46937  | 4.79819  | -0.39652 |
| H | 0.81221  | 5.13141  | -1.37926 |
| H | -0.22875 | 5.54295  | 0.00321  |
| H | 1.33909  | 4.75707  | 0.26667  |
| H | -1.47363 | -1.10017 | 0.02588  |
| O | -1.77637 | -1.25356 | -2.83782 |

|   |          |          |          |
|---|----------|----------|----------|
| C | -0.83266 | -0.55608 | -3.29489 |
| O | -0.80290 | 0.68961  | -3.42557 |
| H | 0.06924  | -1.11442 | -3.63438 |

### 3b- $\gamma$ -addition-2b

Geometry with 88 atoms:

|   |          |          |          |
|---|----------|----------|----------|
| C | 2.74820  | -1.71569 | -0.18865 |
| C | 1.74366  | -0.88699 | -0.49606 |
| N | 0.51981  | -0.93367 | 0.26006  |
| O | -0.31514 | -0.07378 | 0.01226  |
| O | 0.34291  | -1.81908 | 1.09452  |
| H | 2.59939  | -2.39732 | 0.64624  |
| H | 1.71555  | -0.11815 | -1.25705 |
| C | -4.16812 | 0.09257  | -0.95331 |
| C | -3.99845 | -1.42026 | -0.74448 |
| N | -2.88937 | 0.69632  | -1.27373 |
| C | -5.22383 | -2.07929 | -0.06853 |
| C | -4.82745 | -2.58177 | 1.32728  |
| C | -3.78673 | -3.70007 | 1.17988  |
| C | -2.64636 | -3.19509 | 0.27575  |
| N | -2.78807 | -1.71278 | 0.10259  |
| C | -2.85572 | -1.04464 | 1.44105  |
| C | -4.19514 | -1.41765 | 2.10362  |
| H | -2.33930 | 0.28337  | -2.04195 |
| C | -2.42066 | 1.86782  | -0.78641 |
| S | -3.19224 | 2.72526  | 0.47983  |
| N | -1.28159 | 2.27515  | -1.36703 |
| H | -0.86115 | 1.61410  | -2.02808 |
| C | -0.52559 | 3.48727  | -1.08898 |
| C | 0.71985  | 3.16369  | -0.24479 |
| N | 0.30253  | 2.65241  | 1.04901  |
| C | 1.07257  | 1.80742  | 1.79592  |
| H | -4.02346 | -1.70035 | 3.14678  |
| H | -4.24092 | -4.59330 | 0.74008  |
| H | 1.27355  | 2.36515  | -0.77017 |
| H | -1.17640 | 4.15133  | -0.51087 |
| H | -2.73431 | 0.03004  | 1.28999  |
| H | -1.98958 | -1.40840 | 1.99749  |
| H | -2.66693 | -3.62293 | -0.72830 |
| H | -1.65336 | -3.36340 | 0.69654  |
| H | -5.71193 | -2.95204 | 1.85319  |
| H | -5.60198 | -2.90612 | -0.67909 |
| H | -6.03152 | -1.34511 | 0.02378  |
| H | -3.76447 | -1.88491 | -1.70887 |
| H | -4.52174 | 0.55325  | -0.02576 |
| C | 0.36228  | 1.18166  | 2.97149  |





|   |          |          |          |
|---|----------|----------|----------|
| H | -0.26255 | 0.74160  | 2.67703  |
| C | 2.63923  | 1.44210  | 1.73015  |
| C | 3.79818  | 0.85701  | 0.97125  |
| C | 2.44200  | 1.02508  | 3.15826  |
| C | 4.37229  | 1.78305  | -0.10305 |
| H | -1.10285 | -5.24519 | 0.56046  |
| C | 1.27373  | 1.74937  | 3.82692  |
| H | 3.37555  | 1.21287  | 3.70473  |
| H | 1.56741  | 2.77972  | 4.06423  |
| H | 1.94775  | 2.55057  | 0.06689  |
| H | 1.01704  | 1.25971  | 4.77056  |
| H | -1.50462 | 2.85185  | 1.22369  |
| H | 5.33290  | 1.39828  | -0.45594 |
| H | 4.53383  | 2.79184  | 0.29144  |
| H | 4.59216  | 0.60315  | 1.68526  |
| H | 3.71183  | 1.85718  | -0.97443 |
| H | 2.28105  | -0.06134 | 3.16352  |
| C | 0.20676  | 4.88946  | -0.39024 |
| H | 1.10825  | 4.88866  | 0.23057  |
| H | 0.48251  | 5.25511  | -1.38263 |
| H | -0.51356 | 5.58682  | 0.05309  |
| C | -1.72934 | 4.09935  | -2.54133 |
| H | -1.52211 | 5.17026  | -2.46871 |
| H | -0.96525 | 3.63044  | -3.17231 |
| H | -2.69839 | 3.96827  | -3.03019 |
| C | -5.39600 | -1.04059 | -0.98001 |
| H | -5.92278 | -0.08207 | -0.98463 |
| H | -5.23429 | -1.35044 | -2.01900 |
| H | -6.03423 | -1.78096 | -0.48639 |
| H | -3.17365 | -3.41953 | 3.12301  |
| C | 4.46256  | -1.15494 | -0.42612 |
| C | 5.50143  | -1.75445 | 0.29650  |
| C | 4.55653  | -1.12577 | -1.82058 |
| C | 6.60541  | -2.30469 | -0.34979 |
| H | 5.43756  | -1.79650 | 1.38275  |
| C | 5.66070  | -1.67613 | -2.47274 |
| H | 3.76497  | -0.67642 | -2.41312 |
| C | 6.68990  | -2.26504 | -1.74169 |
| H | 7.39599  | -2.77141 | 0.23179  |
| H | 5.71182  | -1.64463 | -3.55773 |
| H | 7.54719  | -2.69647 | -2.25079 |
| H | -1.42729 | -1.16035 | 0.06717  |
| O | -1.77050 | -1.26992 | -2.82997 |
| C | -0.85353 | -0.53129 | -3.27558 |
| O | -0.86831 | 0.71659  | -3.38738 |
| H | 0.06814  | -1.05149 | -3.62386 |

### 3b- $\gamma$ -addition-2c

Geometry with 88 atoms:

|   |          |          |          |
|---|----------|----------|----------|
| C | 1.98045  | -0.15587 | -1.30840 |
| C | 1.74705  | -1.41484 | -1.69036 |
| N | 0.52208  | -2.06023 | -1.29842 |
| O | 0.29732  | -3.16857 | -1.77341 |
| O | -0.23754 | -1.49892 | -0.51541 |
| H | 1.19902  | 0.35559  | -0.74845 |
| H | 2.37113  | -2.05136 | -2.30274 |
| C | -3.47146 | 1.75356  | -0.11193 |
| C | -3.78273 | 0.67256  | -1.15906 |
| N | -2.03438 | 1.92266  | -0.00636 |
| C | -5.24973 | 0.18640  | -1.11858 |
| C | -5.29090 | -1.27117 | -0.63660 |
| C | -4.59823 | -2.16476 | -1.67626 |
| C | -3.21482 | -1.56778 | -1.99464 |
| N | -2.89219 | -0.52694 | -0.96513 |
| C | -3.02512 | -1.11411 | 0.40566  |
| C | -4.51772 | -1.36552 | 0.68739  |
| H | -1.51338 | 2.10537  | -0.87975 |
| C | -1.33625 | 2.11234  | 1.13546  |
| S | -2.03946 | 1.96498  | 2.68709  |
| N | -0.03738 | 2.40563  | 0.92968  |
| H | 0.25069  | 2.47166  | -0.05069 |
| C | 0.98255  | 2.68685  | 1.93499  |
| C | 1.85698  | 1.43907  | 2.15894  |
| N | 1.01835  | 0.38714  | 2.70429  |
| C | 1.13894  | -0.93584 | 2.37628  |
| H | -4.64360 | -2.35479 | 1.13742  |
| H | -5.19496 | -2.22469 | -2.59140 |
| H | 2.22080  | 1.11398  | 1.17120  |
| H | 0.45947  | 2.92105  | 2.86880  |
| H | -2.56581 | -0.42257 | 1.11625  |
| H | -2.43909 | -2.03457 | 0.39214  |
| H | -3.17164 | -1.06313 | -2.96154 |
| H | -2.40606 | -2.30160 | -1.95521 |
| H | -6.32817 | -1.58654 | -0.49412 |
| H | -5.71120 | 0.27535  | -2.10773 |
| H | -5.82753 | 0.81421  | -0.43197 |
| H | -3.50520 | 1.05157  | -2.14888 |
| H | -3.83929 | 1.43463  | 0.86797  |
| C | -0.02750 | -1.78732 | 2.81646  |
| C | 2.19260  | -1.48111 | 1.70785  |
| H | -0.40353 | -1.41198 | 3.77643  |
| H | -0.83720 | -1.65994 | 2.08528  |

|   |          |          |          |
|---|----------|----------|----------|
| C | 2.18978  | -2.86089 | 1.24019  |
| C | 3.15900  | -3.33282 | 0.42616  |
| C | 1.00803  | -3.72910 | 1.62023  |
| C | 3.17612  | -4.71059 | -0.18038 |
| H | -4.49607 | -3.18186 | -1.28330 |
| C | 0.35700  | -3.25904 | 2.91962  |
| H | 1.32428  | -4.77446 | 1.70863  |
| H | 1.06214  | -3.39103 | 3.75016  |
| H | 3.04541  | -0.86536 | 1.42684  |
| H | -0.52831 | -3.86449 | 3.14387  |
| H | 0.10474  | 0.67731  | 3.04433  |
| H | 3.96367  | -4.79447 | -0.93559 |
| H | 2.22363  | -4.95146 | -0.67146 |
| H | 3.98276  | -2.66418 | 0.17264  |
| H | 3.36135  | -5.49593 | 0.56585  |
| H | 0.26161  | -3.69657 | 0.81017  |
| C | 1.79204  | 3.90067  | 1.48801  |
| H | 2.46372  | 4.23712  | 2.28203  |
| H | 2.40059  | 3.66742  | 0.60528  |
| H | 1.11877  | 4.72537  | 1.23694  |
| C | 3.06276  | 1.70466  | 3.06073  |
| H | 3.80682  | 2.33839  | 2.56738  |
| H | 2.74628  | 2.18729  | 3.99349  |
| H | 3.54271  | 0.75544  | 3.31857  |
| C | -4.13913 | 3.07331  | -0.49907 |
| H | -3.72093 | 3.44852  | -1.44022 |
| H | -5.22186 | 2.96501  | -0.61971 |
| H | -3.95473 | 3.81692  | 0.28144  |
| H | -4.90176 | -0.62925 | 1.40262  |
| C | 3.20991  | 0.58247  | -1.61764 |
| C | 3.16080  | 1.98193  | -1.70089 |
| C | 4.43367  | -0.07314 | -1.81974 |
| C | 4.31139  | 2.70952  | -1.99208 |
| H | 2.20291  | 2.48427  | -1.57991 |
| C | 5.58259  | 0.65812  | -2.10408 |
| H | 4.48822  | -1.15534 | -1.73006 |
| C | 5.52395  | 2.05005  | -2.19234 |
| H | 4.25937  | 3.79221  | -2.06657 |
| H | 6.52759  | 0.14292  | -2.25025 |
| H | 6.42281  | 2.61801  | -2.41503 |
| H | -1.92025 | -0.21582 | -1.16726 |
| O | -1.01684 | 0.40825  | -2.68108 |
| C | -0.22724 | 1.37222  | -2.80841 |
| O | -0.09511 | 2.34987  | -2.02166 |
| H | 0.42488  | 1.37020  | -3.70831 |

### 3b- $\gamma$ -addition-TS2c-3c

Geometry with 88 atoms:

|   |          |          |          |
|---|----------|----------|----------|
| C | 2.75535  | -1.05797 | -0.07240 |
| C | 2.18802  | -2.19662 | 0.48712  |
| N | 0.88084  | -2.17967 | 0.91847  |
| O | 0.40339  | -3.21038 | 1.44357  |
| O | 0.17516  | -1.15351 | 0.76394  |
| H | 2.07778  | -0.23095 | -0.27786 |
| H | 2.66956  | -3.15600 | 0.60805  |
| C | -3.92506 | 0.11634  | -0.70949 |
| C | -3.67062 | -1.38034 | -0.89822 |
| N | -2.70139 | 0.84137  | -1.00164 |
| C | -4.87380 | -2.24805 | -0.47445 |
| C | -4.36069 | -3.53030 | 0.19521  |
| C | -3.26696 | -4.13747 | -0.69458 |
| C | -2.04282 | -3.20589 | -0.66482 |
| N | -2.47078 | -1.86719 | -0.12374 |
| C | -2.76311 | -1.98370 | 1.34263  |
| C | -3.74139 | -3.15492 | 1.54990  |
| H | -2.05869 | 0.39974  | -1.68386 |
| C | -2.44055 | 2.10631  | -0.60791 |
| S | -3.41033 | 2.91891  | 0.54915  |
| N | -1.35628 | 2.64705  | -1.18877 |
| H | -0.72196 | 1.99640  | -1.68748 |
| C | -0.77510 | 3.94599  | -0.88542 |
| C | 0.44700  | 3.74095  | 0.02565  |
| N | 0.00216  | 3.03226  | 1.21989  |
| C | 0.70414  | 2.07546  | 1.84326  |
| H | -3.21414 | -4.01735 | 1.97249  |
| H | -3.64059 | -4.25667 | -1.71759 |
| H | 1.13374  | 3.07521  | -0.51423 |
| H | -1.53110 | 4.53010  | -0.35101 |
| H | -3.17368 | -1.02411 | 1.66516  |
| H | -1.80145 | -2.13804 | 1.83220  |
| H | -1.60882 | -3.00933 | -1.64606 |
| H | -1.26155 | -3.56135 | 0.01011  |
| H | -5.18098 | -4.23962 | 0.33399  |
| H | -5.48165 | -2.48092 | -1.35396 |
| H | -5.50877 | -1.69092 | 0.22652  |
| H | -3.40318 | -1.56115 | -1.94578 |
| H | -4.20601 | 0.32248  | 0.32895  |
| C | -0.04066 | 1.26522  | 2.86784  |
| C | 2.02308  | 1.77738  | 1.54824  |
| H | -0.83077 | 1.87423  | 3.32203  |
| H | -0.52577 | 0.43699  | 2.32876  |
| C | 2.66803  | 0.64441  | 2.10402  |

|   |          |          |          |
|---|----------|----------|----------|
| C | 3.82499  | 0.12928  | 1.53005  |
| C | 2.04513  | -0.07874 | 3.27004  |
| C | 4.66309  | -0.91747 | 2.20783  |
| H | -2.97925 | -5.12872 | -0.33146 |
| C | 0.91101  | 0.70909  | 3.92227  |
| H | 2.82238  | -0.30273 | 4.01090  |
| H | 1.33376  | 1.54113  | 4.49925  |
| H | 2.55343  | 2.33235  | 0.77935  |
| H | 0.36446  | 0.07012  | 4.62325  |
| H | -0.98680 | 3.11596  | 1.45400  |
| H | 5.50411  | -1.21372 | 1.57499  |
| H | 4.07663  | -1.81639 | 2.44243  |
| H | 4.31672  | 0.74916  | 0.78227  |
| H | 5.08245  | -0.54884 | 3.15412  |
| H | 1.68426  | -1.05851 | 2.91846  |
| C | -0.40662 | 4.64883  | -2.18823 |
| H | -0.05996 | 5.66930  | -2.00205 |
| H | 0.38428  | 4.10297  | -2.71682 |
| H | -1.28394 | 4.69796  | -2.83918 |
| C | 1.16191  | 5.03906  | 0.39433  |
| H | 1.65958  | 5.48223  | -0.47329 |
| H | 0.45102  | 5.76749  | 0.80219  |
| H | 1.92257  | 4.84365  | 1.15698  |
| C | -5.06919 | 0.55671  | -1.62640 |
| H | -4.82269 | 0.34127  | -2.67251 |
| H | -6.00770 | 0.05318  | -1.37282 |
| H | -5.22217 | 1.63354  | -1.51775 |
| H | -4.51982 | -2.86320 | 2.26154  |
| C | 3.92346  | -1.15633 | -0.96887 |
| C | 4.07077  | -0.18268 | -1.96829 |
| C | 4.86148  | -2.19526 | -0.88774 |
| C | 5.13662  | -0.24419 | -2.86206 |
| H | 3.32142  | 0.60356  | -2.05053 |
| C | 5.93041  | -2.24954 | -1.77697 |
| H | 4.76062  | -2.96368 | -0.12554 |
| C | 6.07256  | -1.27421 | -2.76542 |
| H | 5.23372  | 0.50983  | -3.63808 |
| H | 6.65319  | -3.05718 | -1.70115 |
| H | 6.90575  | -1.32177 | -3.46094 |
| H | -1.67042 | -1.22738 | -0.26383 |
| O | -0.91504 | -0.84342 | -2.29706 |
| C | 0.26204  | -0.38723 | -2.27044 |
| O | 0.60684  | 0.80616  | -2.12237 |
| H | 1.07578  | -1.13513 | -2.40471 |

3b- $\gamma$ -addition-3c

| Geometry with 88 atoms: |          |          |          |
|-------------------------|----------|----------|----------|
| C                       | 2.81509  | -0.64488 | 0.28980  |
| C                       | 2.18527  | -1.74443 | 1.08299  |
| N                       | 0.90100  | -1.75057 | 1.35342  |
| O                       | 0.37744  | -2.67256 | 2.08301  |
| O                       | 0.12232  | -0.79859 | 0.92290  |
| H                       | 2.03882  | -0.20723 | -0.34597 |
| H                       | 2.73152  | -2.57639 | 1.50575  |
| C                       | -3.57473 | -0.28922 | -0.84308 |
| C                       | -3.24773 | -1.78341 | -0.81359 |
| N                       | -2.34475 | 0.44425  | -1.09391 |
| C                       | -4.47232 | -2.65929 | -0.47635 |
| C                       | -4.01206 | -3.86608 | 0.35444  |
| C                       | -2.77522 | -4.47748 | -0.31937 |
| C                       | -1.60543 | -3.48528 | -0.18560 |
| N                       | -2.16294 | -2.13280 | 0.17029  |
| C                       | -2.67689 | -2.14892 | 1.57874  |
| C                       | -3.60864 | -3.36193 | 1.74797  |
| H                       | -1.62797 | -0.07282 | -1.64581 |
| C                       | -2.17692 | 1.76001  | -0.89103 |
| S                       | -3.36515 | 2.73920  | -0.12926 |
| N                       | -0.99213 | 2.24830  | -1.31646 |
| H                       | -0.32290 | 1.57372  | -1.73747 |
| C                       | -0.69724 | 3.65785  | -1.45770 |
| C                       | -0.09263 | 4.30884  | -0.17059 |
| N                       | -0.47848 | 3.56564  | 1.02488  |
| C                       | 0.18381  | 2.59660  | 1.59627  |
| H                       | -3.10003 | -4.15869 | 2.30204  |
| H                       | -2.98880 | -4.68972 | -1.37312 |
| H                       | 0.99809  | 4.27712  | -0.23055 |
| H                       | -1.63914 | 4.17667  | -1.66592 |
| H                       | -3.19102 | -1.19768 | 1.73963  |
| H                       | -1.78963 | -2.18772 | 2.21297  |
| H                       | -1.04337 | -3.34270 | -1.11072 |
| H                       | -0.91494 | -3.73754 | 0.62199  |
| H                       | -4.81530 | -4.60445 | 0.43020  |
| H                       | -4.95370 | -2.98106 | -1.40510 |
| H                       | -5.21062 | -2.07637 | 0.09087  |
| H                       | -2.82917 | -2.05812 | -1.78767 |
| H                       | -3.98113 | 0.03354  | 0.12238  |
| C                       | -0.46159 | 1.85576  | 2.72287  |
| C                       | 1.47670  | 2.16118  | 1.15432  |
| H                       | -1.31946 | 2.41133  | 3.11394  |
| H                       | -0.81336 | 0.90340  | 2.29390  |
| C                       | 2.15653  | 1.20518  | 1.84076  |
| C                       | 3.34485  | 0.55310  | 1.18258  |

|   |          |          |          |   |          |          |          |
|---|----------|----------|----------|---|----------|----------|----------|
| C | 1.73047  | 0.74387  | 3.20406  | C | 2.01172  | -0.90726 | -1.02900 |
| C | 4.44377  | 0.13531  | 2.15737  | C | 1.35352  | -1.97225 | -0.55710 |
| H | -2.50711 | -5.42510 | 0.15812  | N | 0.07647  | -1.76755 | 0.06678  |
| C | 0.58533  | 1.56283  | 3.79577  | O | -0.52074 | -2.77223 | 0.45185  |
| H | 2.60084  | 0.77210  | 3.87011  | O | -0.36129 | -0.63306 | 0.20444  |
| H | 0.96965  | 2.50781  | 4.20013  | H | 1.50097  | 0.05136  | -0.95761 |
| H | 1.85109  | 2.48691  | 0.18903  | H | 1.65372  | -3.01077 | -0.56363 |
| H | 0.12308  | 1.01658  | 4.62259  | C | -3.92814 | 1.09250  | -0.73094 |
| H | -1.45839 | 3.68005  | 1.29693  | C | -4.23479 | -0.38145 | -1.02689 |
| H | 5.33162  | -0.18689 | 1.60673  | N | -2.50371 | 1.33603  | -0.86411 |
| H | 4.12403  | -0.69199 | 2.80125  | C | -5.65511 | -0.80858 | -0.58707 |
| H | 3.76024  | 1.27763  | 0.47000  | C | -5.55092 | -1.79351 | 0.58734  |
| H | 4.73922  | 0.97286  | 2.79926  | C | -4.87887 | -3.08420 | 0.09850  |
| H | 1.44914  | -0.31634 | 3.13187  | C | -3.58248 | -2.70999 | -0.64302 |
| C | 0.27081  | 3.84451  | -2.62236 | N | -3.24723 | -1.28186 | -0.33400 |
| H | 0.55467  | 4.89719  | -2.72336 | C | -3.22513 | -1.06421 | 1.14829  |
| H | 1.18085  | 3.25320  | -2.46773 | C | -4.66878 | -1.16188 | 1.67488  |
| H | -0.18929 | 3.51760  | -3.55898 | H | -2.03744 | 1.01839  | -1.72655 |
| C | -0.55114 | 5.75399  | -0.02397 | C | -1.78098 | 2.17837  | -0.09001 |
| H | -0.31712 | 6.31371  | -0.93464 | S | -2.38036 | 2.83816  | 1.37011  |
| H | -1.63587 | 5.79543  | 0.12774  | N | -0.54269 | 2.41923  | -0.55375 |
| H | -0.05462 | 6.24351  | 0.81888  | H | -0.27941 | 1.90991  | -1.40343 |
| C | -4.61262 | -0.02804 | -1.93884 | C | 0.41940  | 3.37929  | -0.02935 |
| H | -4.23613 | -0.38362 | -2.90502 | C | 1.56785  | 2.65398  | 0.68976  |
| H | -5.56082 | -0.53039 | -1.72233 | N | 1.02350  | 1.87809  | 1.78833  |
| H | -4.80581 | 1.04475  | -2.01128 | C | 1.58867  | 0.70763  | 2.21840  |
| H | -4.49305 | -3.07239 | 2.32438  | H | -4.68683 | -1.76960 | 2.58459  |
| C | 3.93197  | -1.13510 | -0.61614 | H | -5.54318 | -3.63734 | -0.57255 |
| C | 4.05479  | -0.57746 | -1.89493 | H | 2.02421  | 1.95861  | -0.03540 |
| C | 4.85991  | -2.10463 | -0.21981 | H | -0.10975 | 3.99943  | 0.70154  |
| C | 5.08058  | -0.97462 | -2.75203 | H | -2.75972 | -0.09477 | 1.33785  |
| H | 3.31395  | 0.15071  | -2.22453 | H | -2.57124 | -1.83952 | 1.55158  |
| C | 5.88654  | -2.50356 | -1.07492 | H | -3.67600 | -2.77306 | -1.72904 |
| H | 4.78758  | -2.55895 | 0.76529  | H | -2.72105 | -3.30554 | -0.33889 |
| C | 6.00184  | -1.93852 | -2.34430 | H | -6.54775 | -2.00709 | 0.98292  |
| H | 5.15229  | -0.53763 | -3.74462 | H | -6.19490 | -1.26690 | -1.42264 |
| H | 6.59516  | -3.25976 | -0.74738 | H | -6.22383 | 0.07393  | -0.27588 |
| H | 6.79903  | -2.25279 | -3.01244 | H | -4.06466 | -0.56937 | -2.09313 |
| H | -1.35313 | -1.46350 | 0.15663  | H | -4.20219 | 1.32432  | 0.30254  |
| O | -0.59620 | -1.32377 | -2.28095 | C | 0.73674  | -0.06890 | 3.19611  |
| C | 0.55648  | -0.82415 | -2.35396 | C | 2.82278  | 0.27033  | 1.83501  |
| O | 0.85098  | 0.39570  | -2.36899 | H | 0.26360  | 0.63984  | 3.88760  |
| H | 1.40071  | -1.54532 | -2.42124 | H | -0.07798 | -0.55360 | 2.63912  |
|   |          |          |          | C | 3.35819  | -1.02465 | 2.23678  |
|   |          |          |          | C | 4.61441  | -1.42572 | 1.94798  |
|   |          |          |          | C | 2.40198  | -1.92553 | 2.98811  |

**3b**- $\gamma$ -addition-2d

Geometry with 88 atoms:



|                                                |          |          |          |   |          |          |          |
|------------------------------------------------|----------|----------|----------|---|----------|----------|----------|
| C                                              | 5.65002  | -0.60316 | 1.22702  | C | 2.22106  | -2.12600 | 0.71222  |
| H                                              | -4.65836 | -3.73526 | 0.95142  | N | 0.88310  | -2.06244 | 1.02859  |
| C                                              | 1.54746  | -1.11213 | 3.96101  | O | 0.36569  | -3.02586 | 1.63877  |
| H                                              | 2.95530  | -2.71376 | 3.51016  | O | 0.19567  | -1.06803 | 0.69699  |
| H                                              | 2.20138  | -0.61156 | 4.68632  | H | 2.22520  | -0.29742 | -0.36466 |
| H                                              | 3.43729  | 0.89157  | 1.18965  | H | 2.68723  | -3.05667 | 1.00338  |
| H                                              | 0.87401  | -1.76766 | 4.52413  | C | -3.96844 | -0.02378 | -0.70325 |
| H                                              | 0.02928  | 1.99393  | 1.97199  | C | -3.67270 | -1.51839 | -0.83772 |
| H                                              | 6.44624  | -1.24011 | 0.82864  | N | -2.76380 | 0.72115  | -1.02061 |
| H                                              | 6.12366  | 0.12765  | 1.89793  | C | -4.85287 | -2.40288 | -0.38671 |
| H                                              | 4.92615  | -2.41123 | 2.29438  | C | -4.30787 | -3.64359 | 0.33389  |
| H                                              | 5.23030  | -0.04124 | 0.38333  | C | -3.19259 | -4.25403 | -0.52620 |
| H                                              | 1.72843  | -2.42517 | 2.27326  | C | -1.99593 | -3.28717 | -0.52931 |
| C                                              | 0.91285  | 4.25188  | -1.18107 | N | -2.46326 | -1.94140 | -0.04202 |
| H                                              | 1.55813  | 5.05750  | -0.82171 | C | -2.76008 | -2.00707 | 1.42664  |
| H                                              | 1.47684  | 3.65702  | -1.91125 | C | -3.70721 | -3.19695 | 1.67550  |
| H                                              | 0.05916  | 4.70128  | -1.69641 | H | -2.11752 | 0.27659  | -1.69855 |
| C                                              | 2.64328  | 3.62272  | 1.18852  | C | -2.53377 | 2.00360  | -0.66883 |
| H                                              | 3.24449  | 4.02209  | 0.36537  | S | -3.51808 | 2.82823  | 0.46795  |
| H                                              | 2.18068  | 4.45880  | 1.72691  | N | -1.46497 | 2.55205  | -1.26977 |
| H                                              | 3.31612  | 3.10984  | 1.88197  | H | -0.81572 | 1.90448  | -1.75333 |
| C                                              | -4.72022 | 1.99483  | -1.67838 | C | -0.94091 | 3.88868  | -1.03796 |
| H                                              | -4.40771 | 1.82361  | -2.71496 | C | 0.29094  | 3.79132  | -0.12233 |
| H                                              | -5.79833 | 1.81835  | -1.60699 | N | -0.11356 | 3.11490  | 1.10625  |
| H                                              | -4.52848 | 3.04208  | -1.42813 | C | 0.63132  | 2.20752  | 1.75165  |
| H                                              | -5.04800 | -0.16770 | 1.93787  | H | -3.15881 | -4.02632 | 2.13554  |
| C                                              | 3.33850  | -0.91679 | -1.63789 | H | -3.55695 | -4.42538 | -1.54522 |
| C                                              | 3.77244  | 0.24432  | -2.29324 | H | 1.01134  | 3.13736  | -0.63166 |
| C                                              | 4.19898  | -2.02355 | -1.56408 | H | -1.72171 | 4.46644  | -0.53337 |
| C                                              | 5.03562  | 0.29928  | -2.87459 | H | -3.20036 | -1.04791 | 1.70844  |
| H                                              | 3.10460  | 1.10097  | -2.35249 | H | -1.79798 | -2.11631 | 1.92762  |
| C                                              | 5.45972  | -1.96691 | -2.14457 | H | -1.56481 | -3.11571 | -1.51652 |
| H                                              | 3.89391  | -2.91626 | -1.02534 | H | -1.20711 | -3.59365 | 0.16047  |
| C                                              | 5.88111  | -0.80670 | -2.79924 | H | -5.10883 | -4.36963 | 0.49693  |
| H                                              | 5.35991  | 1.20265  | -3.38267 | H | -5.44963 | -2.68540 | -1.25921 |
| H                                              | 6.12390  | -2.82366 | -2.07619 | H | -5.50664 | -1.83808 | 0.29042  |
| H                                              | 6.87080  | -0.76468 | -3.24539 | H | -3.39545 | -1.72854 | -1.87698 |
| H                                              | -2.31947 | -1.08942 | -0.76524 | H | -4.25654 | 0.21292  | 0.32647  |
| O                                              | -1.43343 | -1.35286 | -2.36738 | C | -0.06836 | 1.38764  | 2.79877  |
| C                                              | -0.60569 | -0.60149 | -2.93924 | C | 1.96230  | 1.96668  | 1.45265  |
| O                                              | -0.52470 | 0.64967  | -2.84543 | H | -0.87560 | 1.97270  | 3.25434  |
| H                                              | 0.13111  | -1.09581 | -3.60996 | H | -0.52952 | 0.53294  | 2.27854  |
| <b>3b-<math>\gamma</math>-addition-TS3d-3d</b> |          |          |          | C | 2.65738  | 0.86539  | 2.01033  |
| Geometry with 88 atoms:                        |          |          |          | C | 3.84785  | 0.40828  | 1.45694  |
| C                                              | 2.85557  | -1.09184 | 0.03625  | C | 2.06308  | 0.12059  | 3.17989  |
|                                                |          |          |          | C | 4.66299  | 1.24881  | 0.50852  |

|                                           |          |          |          |   |          |          |          |
|-------------------------------------------|----------|----------|----------|---|----------|----------|----------|
| H                                         | -2.87849 | -5.22124 | -0.12229 | N | 0.75465  | -1.74347 | 1.32612  |
| C                                         | 0.92063  | 0.88419  | 3.84653  | O | 0.15142  | -2.60826 | 2.06679  |
| H                                         | 2.85568  | -0.09348 | 3.90593  | O | 0.04523  | -0.77128 | 0.82508  |
| H                                         | 1.32632  | 1.74004  | 4.40044  | H | 2.12881  | -0.29074 | -0.35223 |
| H                                         | 2.45087  | 2.54973  | 0.68082  | H | 2.53138  | -2.66193 | 1.58960  |
| H                                         | 0.40851  | 0.23982  | 4.56828  | C | -3.58353 | -0.12874 | -0.91708 |
| H                                         | -1.10528 | 3.15915  | 1.34108  | C | -3.36447 | -1.64013 | -0.83021 |
| H                                         | 5.56921  | 0.72374  | 0.19493  | N | -2.29924 | 0.51231  | -1.14404 |
| H                                         | 4.96930  | 2.18854  | 0.98874  | C | -4.65856 | -2.40843 | -0.49025 |
| H                                         | 4.38170  | -0.36580 | 2.00666  | C | -4.31012 | -3.61105 | 0.39748  |
| H                                         | 4.10620  | 1.51512  | -0.39884 | C | -3.11268 | -4.34170 | -0.22693 |
| H                                         | 1.70745  | -0.86070 | 2.83351  | C | -1.87271 | -3.43710 | -0.10510 |
| C                                         | -0.60931 | 4.53510  | -2.37960 | N | -2.32703 | -2.03201 | 0.18861  |
| H                                         | -0.30452 | 5.57770  | -2.25224 | C | -2.86845 | -1.95413 | 1.58419  |
| H                                         | 0.19959  | 3.99430  | -2.88563 | C | -3.89325 | -3.08560 | 1.77928  |
| H                                         | -1.49204 | 4.51399  | -3.02486 | H | -1.60970 | -0.06270 | -1.67345 |
| C                                         | 0.93571  | 5.14244  | 0.17836  | C | -2.04010 | 1.81098  | -0.93924 |
| H                                         | 1.39630  | 5.57147  | -0.71654 | S | -3.18354 | 2.88489  | -0.23830 |
| H                                         | 0.18937  | 5.84814  | 0.56210  | N | -0.80285 | 2.20694  | -1.31171 |
| H                                         | 1.71475  | 5.02524  | 0.93846  | H | -0.17330 | 1.48219  | -1.70622 |
| C                                         | -5.12200 | 0.35224  | -1.63694 | C | -0.41970 | 3.59276  | -1.47987 |
| H                                         | -4.86720 | 0.10708  | -2.67451 | C | 0.13882  | 4.26306  | -0.18009 |
| H                                         | -6.04698 | -0.16789 | -1.36729 | N | -0.31791 | 3.56562  | 1.01903  |
| H                                         | -5.30513 | 1.42762  | -1.56719 | C | 0.28193  | 2.57390  | 1.61927  |
| H                                         | -4.49788 | -2.89855 | 2.37064  | H | -3.45680 | -3.89734 | 2.37215  |
| C                                         | 4.10055  | -1.38370 | -0.70280 | H | -3.32368 | -4.57612 | -1.27655 |
| C                                         | 4.28083  | -0.81093 | -1.96831 | H | 1.23024  | 4.20705  | -0.18553 |
| C                                         | 5.09678  | -2.22484 | -0.18745 | H | -1.31678 | 4.15359  | -1.76248 |
| C                                         | 5.43146  | -1.08038 | -2.70749 | H | -3.31224 | -0.96172 | 1.69754  |
| H                                         | 3.51005  | -0.15576 | -2.36986 | H | -1.99954 | -2.03370 | 2.23977  |
| C                                         | 6.24799  | -2.48520 | -0.92223 | H | -1.28399 | -3.37529 | -1.02240 |
| H                                         | 4.98028  | -2.65774 | 0.80362  | H | -1.21764 | -3.71040 | 0.72396  |
| C                                         | 6.41870  | -1.91426 | -2.18613 | H | -5.16969 | -4.28175 | 0.48376  |
| H                                         | 5.55677  | -0.63361 | -3.68974 | H | -5.14201 | -2.73153 | -1.41747 |
| H                                         | 7.01677  | -3.13201 | -0.50869 | H | -5.36360 | -1.74980 | 0.03497  |
| H                                         | 7.31900  | -2.11979 | -2.75822 | H | -2.94838 | -1.98082 | -1.78372 |
| H                                         | -1.68060 | -1.28461 | -0.20413 | H | -3.99937 | 0.25137  | 0.02304  |
| O                                         | -0.96850 | -0.95752 | -2.28758 | C | -0.41015 | 1.88862  | 2.75305  |
| C                                         | 0.20299  | -0.48696 | -2.24947 | C | 1.55425  | 2.06813  | 1.19344  |
| O                                         | 0.53263  | 0.71573  | -2.16639 | H | -1.23247 | 2.50095  | 3.13512  |
| H                                         | 1.02551  | -1.23578 | -2.30887 | H | -0.82182 | 0.95683  | 2.33268  |
| <b>3b-<math>\gamma</math>-addition-3d</b> |          |          |          | C | 2.17865  | 1.08741  | 1.89370  |
| Geometry with 88 atoms:                   |          |          |          | C | 3.36036  | 0.36833  | 1.29501  |
| C                                         | 2.80821  | -0.77625 | 0.35694  | C | 1.70436  | 0.64746  | 3.24774  |
| C                                         | 2.04663  | -1.81709 | 1.11753  | C | 4.30078  | 1.30480  | 0.52751  |
|                                           |          |          |          | H | -2.92680 | -5.28853 | 0.28970  |

|                                           |          |          |          |   |          |          |          |
|-------------------------------------------|----------|----------|----------|---|----------|----------|----------|
| C                                         | 0.61358  | 1.54104  | 3.83320  | C | -4.61939 | 0.05517  | -0.66751 |
| H                                         | 2.57320  | 0.60132  | 3.91668  | C | -4.32354 | 1.20553  | -1.64114 |
| H                                         | 1.05548  | 2.46364  | 4.23027  | C | -4.01353 | 2.47547  | -0.83682 |
| H                                         | 1.94432  | 2.37334  | 0.22993  | C | -2.93375 | 2.14324  | 0.21042  |
| H                                         | 0.11526  | 1.03191  | 4.66266  | N | -2.33438 | 0.80747  | -0.12718 |
| H                                         | -1.29493 | 3.74101  | 1.26780  | C | -1.85942 | 0.80907  | -1.55219 |
| H                                         | 5.23782  | 0.79211  | 0.29478  | C | -3.08898 | 0.83600  | -2.47675 |
| H                                         | 4.53586  | 2.19734  | 1.11749  | H | -1.34086 | -1.55721 | 1.42371  |
| H                                         | 3.92026  | -0.11174 | 2.10881  | C | -0.36154 | -2.35730 | -0.15645 |
| H                                         | 3.86319  | 1.62297  | -0.42581 | S | -0.32356 | -2.83223 | -1.80156 |
| H                                         | 1.34443  | -0.38784 | 3.15865  | N | 0.66946  | -2.49277 | 0.69108  |
| C                                         | 0.62312  | 3.68830  | -2.58932 | H | 0.52614  | -2.07080 | 1.62392  |
| H                                         | 0.95812  | 4.72330  | -2.71461 | C | 1.99786  | -3.00769 | 0.38997  |
| H                                         | 1.49638  | 3.06736  | -2.35696 | C | 2.98290  | -1.84305 | 0.17630  |
| H                                         | 0.20597  | 3.34092  | -3.53852 | N | 2.50590  | -1.03422 | -0.92923 |
| C                                         | -0.28676 | 5.72291  | -0.09607 | C | 2.80464  | 0.28455  | -1.09780 |
| H                                         | 0.01110  | 6.24915  | -1.00805 | H | -2.93095 | 1.56773  | -3.27431 |
| H                                         | -1.37624 | 5.79822  | -0.00373 | H | -4.91267 | 2.84301  | -0.33387 |
| H                                         | 0.17995  | 6.22279  | 0.75777  | H | 2.96213  | -1.21803 | 1.08479  |
| C                                         | -4.56246 | 0.17078  | -2.05617 | H | 1.92315  | -3.57887 | -0.54175 |
| H                                         | -4.17664 | -0.23360 | -2.99916 | H | -1.22856 | -0.07231 | -1.69753 |
| H                                         | -5.54955 | -0.26143 | -1.86328 | H | -1.23880 | 1.70304  | -1.65399 |
| H                                         | -4.67971 | 1.25199  | -2.16086 | H | -3.33383 | 2.05492  | 1.22323  |
| H                                         | -4.76254 | -2.70790 | 2.32724  | H | -2.11141 | 2.86043  | 0.23110  |
| C                                         | 3.95106  | -1.40177 | -0.42078 | H | -5.18586 | 1.36987  | -2.29261 |
| C                                         | 4.06215  | -1.17107 | -1.79517 | H | -5.44058 | 0.32652  | 0.00376  |
| C                                         | 4.92942  | -2.17603 | 0.21353  | H | -4.93641 | -0.82735 | -1.23188 |
| C                                         | 5.12626  | -1.70639 | -2.52168 | H | -3.52771 | -0.22047 | 1.22316  |
| H                                         | 3.30269  | -0.56733 | -2.29087 | H | -2.65181 | -1.77817 | -1.26180 |
| C                                         | 5.99384  | -2.71018 | -0.50962 | C | 2.01847  | 0.99093  | -2.17770 |
| H                                         | 4.86448  | -2.36171 | 1.28442  | C | 3.64145  | 1.01659  | -0.31111 |
| C                                         | 6.09555  | -2.47676 | -1.88173 | H | 1.72304  | 0.28317  | -2.96136 |
| H                                         | 5.19585  | -1.52008 | -3.59020 | H | 1.09210  | 1.35960  | -1.70642 |
| H                                         | 6.74545  | -3.30899 | -0.00179 | C | 3.77476  | 2.46114  | -0.51698 |
| H                                         | 6.92475  | -2.89465 | -2.44619 | C | 3.35296  | 3.03410  | -1.66166 |
| H                                         | -1.46622 | -1.42366 | 0.16634  | H | -3.66473 | 3.26748  | -1.50779 |
| O                                         | -0.68102 | -1.40549 | -2.25709 | C | 2.79663  | 2.16765  | -2.76340 |
| C                                         | 0.51262  | -1.00665 | -2.24617 | H | 3.46791  | 4.10381  | -1.82406 |
| O                                         | 0.91436  | 0.17873  | -2.33462 | H | 3.62257  | 1.77547  | -3.37980 |
| H                                         | 1.29027  | -1.79817 | -2.15783 | H | 4.15758  | 0.56760  | 0.53362  |
| <b>3b-<math>\gamma'</math>-addition-1</b> |          |          |          | H | 2.15020  | 2.74432  | -3.43354 |
| Geometry with 75 atoms:                   |          |          |          | H | 1.82162  | -1.45245 | -1.55352 |
| C                                         | -2.76163 | -1.66527 | -0.17877 | C | -3.68098 | -2.76580 | 0.35419  |
| C                                         | -3.34639 | -0.28246 | 0.14269  | H | -3.75146 | -2.70637 | 1.44629  |
| N                                         | -1.44342 | -1.76686 | 0.40961  | H | -4.69002 | -2.70135 | -0.06517 |
|                                           |          |          |          | H | -3.26353 | -3.74126 | 0.08928  |

|   |          |          |          |   |          |          |          |
|---|----------|----------|----------|---|----------|----------|----------|
| H | -3.23042 | -0.14158 | -2.95068 | H | 2.31149  | 0.22499  | 1.88769  |
| C | 2.43048  | -3.93066 | 1.52561  | C | 2.11959  | 1.97278  | 0.88221  |
| H | 3.37331  | -4.43169 | 1.29163  | S | 2.71416  | 3.13140  | -0.23220 |
| H | 2.55926  | -3.36850 | 2.45886  | N | 0.94971  | 2.10181  | 1.52572  |
| H | 1.66746  | -4.69682 | 1.68938  | H | 0.70228  | 1.31737  | 2.15238  |
| C | 4.41352  | -2.33053 | -0.06615 | C | 0.09879  | 3.28253  | 1.55946  |
| H | 4.86191  | -2.73563 | 0.84625  | C | -1.17495 | 3.07921  | 0.72072  |
| H | 4.42500  | -3.10747 | -0.84041 | N | -0.79554 | 2.78678  | -0.64919 |
| H | 5.03765  | -1.50098 | -0.41154 | C | -1.60910 | 2.12094  | -1.51879 |
| H | -1.50761 | 0.66021  | 0.48121  | H | 4.70210  | -0.57614 | -3.56202 |
| C | 4.38930  | 3.24962  | 0.60753  | H | 5.14559  | -3.70645 | -1.50641 |
| H | 5.39938  | 2.88374  | 0.83153  | H | -1.71359 | 2.20478  | 1.13135  |
| H | 4.45677  | 4.31418  | 0.36312  | H | 0.66786  | 4.10594  | 1.11545  |
| H | 3.79877  | 3.13990  | 1.52630  | H | 3.05285  | 0.70825  | -1.60112 |
| O | -0.46259 | -0.97192 | 2.82155  | H | 2.55847  | -0.66661 | -2.59970 |
| C | -0.34535 | 0.30248  | 2.60559  | H | 3.27001  | -3.21869 | -0.19110 |
| C | -1.02706 | 1.26982  | 3.40443  | H | 2.40250  | -2.83822 | -1.68979 |
| C | 0.44233  | 0.82916  | 1.53425  | H | 6.44795  | -1.74337 | -2.25560 |
| C | -0.88389 | 2.63460  | 3.18290  | H | 6.14718  | -2.03966 | 0.22583  |
| H | -1.63756 | 0.90258  | 4.22677  | H | 6.31758  | -0.34336 | -0.22960 |
| C | 0.57841  | 2.20386  | 1.32727  | H | 4.06680  | -1.58112 | 1.15450  |
| H | 0.99147  | 0.13423  | 0.89934  | H | 4.46819  | 1.24079  | 0.05530  |
| C | -0.07871 | 3.12425  | 2.14633  | C | -0.99654 | 1.81300  | -2.86849 |
| H | -1.40317 | 3.33393  | 3.83633  | C | -2.91653 | 1.80580  | -1.29668 |
| H | 1.22578  | 2.55193  | 0.52185  | H | -1.19573 | 2.67427  | -3.52346 |
| H | 0.04212  | 4.19254  | 1.99091  | H | 0.09299  | 1.72806  | -2.77305 |

### 3b- $\gamma'$ -addition-2a

Geometry with 93 atoms:

|   |          |          |          |   |          |          |          |
|---|----------|----------|----------|---|----------|----------|----------|
| C | -2.49453 | -1.70480 | -0.52219 | C | -3.69193 | 1.07933  | -2.30332 |
| C | -1.49084 | -0.88073 | -0.19662 | C | -3.08172 | 0.48796  | -3.34955 |
| N | -0.20270 | -1.05019 | -0.78848 | H | 4.38576  | -3.04530 | -2.95469 |
| O | 0.61213  | -0.14840 | -0.57876 | C | -1.58177 | 0.54482  | -3.49390 |
| O | 0.06108  | -2.03468 | -1.46981 | H | -3.66087 | -0.07226 | -4.08122 |
| H | -2.29779 | -2.49902 | -1.23948 | H | -1.29111 | 0.49634  | -4.54918 |
| H | -1.52228 | -0.01436 | 0.44726  | H | -3.42020 | 2.09221  | -0.37652 |
| C | 4.16017  | 0.54381  | 0.84123  | H | -1.13550 | -0.34261 | -3.01893 |
| C | 4.29040  | -0.89576 | 0.32763  | H | 0.20181  | 2.76284  | -0.84682 |
| N | 2.77274  | 0.81619  | 1.15952  | C | -3.85588 | -1.57840 | -0.01109 |
| C | 5.66187  | -1.21725 | -0.30944 | C | -4.87930 | -2.30344 | -0.63863 |
| C | 5.47312  | -1.57546 | -1.78998 | C | -4.17709 | -0.74243 | 1.07108  |
| C | 4.60901  | -2.83938 | -1.90293 | C | -6.19721 | -2.18731 | -0.20771 |
| C | 3.30259  | -2.62794 | -1.11000 | H | -4.63230 | -2.94781 | -1.47920 |
| N | 3.22454  | -1.18848 | -0.69869 | C | -5.49347 | -0.63348 | 1.50547  |
| C | 3.32508  | -0.30424 | -1.91014 | H | -3.39140 | -0.19956 | 1.58950  |
| C | 4.74898  | -0.41159 | -2.48143 | C | -6.50638 | -1.35215 | 0.86584  |
|   |          |          |          | H | -6.98242 | -2.74647 | -0.70805 |
|   |          |          |          | H | -5.73162 | 0.00912  | 2.34820  |
|   |          |          |          | H | -7.53370 | -1.26300 | 1.20765  |

|   |          |          |          |   |          |          |          |
|---|----------|----------|----------|---|----------|----------|----------|
| C | 5.04506  | 0.74048  | 2.07325  | C | 2.60262  | -3.09773 | -0.50168 |
| H | 4.69557  | 0.10728  | 2.89684  | N | 2.86347  | -1.62259 | -0.47168 |
| H | 6.09376  | 0.50062  | 1.86888  | C | 3.03855  | -1.10763 | -1.87246 |
| H | 4.98977  | 1.78394  | 2.39603  | C | 4.36148  | -1.64730 | -2.43994 |
| H | 5.29534  | 0.52356  | -2.31547 | H | 2.58006  | 0.47535  | 1.76971  |
| C | -0.22045 | 3.60343  | 3.01838  | C | 2.54021  | 1.92588  | 0.35985  |
| H | -0.75187 | 4.55405  | 3.11081  | S | 3.14111  | 2.64745  | -1.07970 |
| H | -0.83822 | 2.81462  | 3.46646  | N | 1.48888  | 2.41079  | 1.03940  |
| H | 0.70789  | 3.67382  | 3.59241  | H | 1.20265  | 1.85221  | 1.86240  |
| C | -2.08700 | 4.30818  | 0.78269  | C | 0.80781  | 3.66745  | 0.79719  |
| H | -2.60106 | 4.38300  | 1.74606  | C | -0.56453 | 3.45625  | 0.12995  |
| H | -1.49924 | 5.22051  | 0.62500  | N | -0.39156 | 2.64106  | -1.06774 |
| H | -2.84460 | 4.25907  | -0.00414 | C | -1.36790 | 1.94504  | -1.65648 |
| H | 2.29997  | -0.98353 | -0.28355 | H | 4.20040  | -2.02557 | -3.45405 |
| O | 1.03465  | -0.30994 | 2.93403  | H | 4.09628  | -4.65315 | -0.75227 |
| C | -5.18161 | 1.01212  | -2.09875 | H | -1.20151 | 2.88402  | 0.82316  |
| H | -5.62596 | 2.01486  | -2.14236 | H | 1.43258  | 4.24841  | 0.11096  |
| H | -5.66433 | 0.38807  | -2.85753 | H | 2.99592  | -0.01632 | -1.82595 |
| H | -5.42106 | 0.59818  | -1.11082 | H | 2.16090  | -1.45919 | -2.41807 |
| C | 0.31655  | -1.34840 | 2.63632  | H | 2.56854  | -3.43114 | 0.53854  |
| C | 0.81639  | -2.41007 | 1.82859  | H | 1.61452  | -3.23208 | -0.94399 |
| C | -1.02221 | -1.50495 | 3.10265  | H | 5.73478  | -3.26228 | -1.96408 |
| C | 0.04074  | -3.51657 | 1.49809  | H | 5.57733  | -2.91389 | 0.53266  |
| H | 1.85149  | -2.34275 | 1.49140  | H | 6.10942  | -1.46705 | -0.32378 |
| C | -1.78192 | -2.62262 | 2.78036  | H | 3.77525  | -1.72563 | 1.38830  |
| H | -1.42850 | -0.72192 | 3.74097  | H | 4.62391  | 0.57174  | -0.43929 |
| C | -1.27038 | -3.63922 | 1.96554  | C | -0.92946 | 1.09763  | -2.82842 |
| H | 0.46497  | -4.29699 | 0.86781  | C | -2.70906 | 2.03636  | -1.29158 |
| H | -2.79840 | -2.70240 | 3.16237  | H | -0.63542 | 1.79491  | -3.62211 |
| H | -1.87421 | -4.50500 | 1.70983  | H | -0.00945 | 0.56947  | -2.54570 |

**3b- $\gamma'$ -addition-TS2a-3a**

Geometry with 93 atoms:

|   |          |          |          |   |          |          |          |
|---|----------|----------|----------|---|----------|----------|----------|
| C | -2.74993 | -1.29815 | -0.85809 | C | -3.28860 | 0.07032  | -2.58785 |
| C | -1.68897 | -0.69278 | -0.20142 | H | 3.35647  | -4.13075 | -2.26643 |
| N | -0.39766 | -0.87462 | -0.63217 | C | -1.99096 | 0.10837  | -3.36287 |
| O | 0.50153  | -0.17053 | -0.11537 | H | -4.06383 | -0.58050 | -2.99087 |
| O | -0.10859 | -1.71280 | -1.51631 | H | -2.25046 | 0.39757  | -4.38955 |
| H | -2.49392 | -2.02881 | -1.62154 | H | -3.02082 | 2.75268  | -0.53803 |
| H | -1.75085 | -0.05458 | 0.66870  | H | -1.55917 | -0.89394 | -3.43162 |
| C | 4.30168  | 0.16343  | 0.52402  | H | 0.56743  | 2.47818  | -1.37833 |
| C | 4.06205  | -1.34665 | 0.39976  | C | -4.06033 | -1.47312 | -0.21020 |
| N | 3.05481  | 0.79878  | 0.89255  | C | -4.98175 | -2.37555 | -0.76221 |
| C | 5.25892  | -2.14050 | -0.17426 | C | -4.42508 | -0.76455 | 0.94386  |
| C | 4.86703  | -2.76743 | -1.51936 | C | -6.23228 | -2.56512 | -0.18157 |
| C | 3.73230  | -3.77872 | -1.30003 | H | -4.70775 | -2.93339 | -1.65550 |
|   |          |          |          | C | -5.67577 | -0.95444 | 1.52524  |
|   |          |          |          | H | -3.73154 | -0.05982 | 1.39360  |

|                                            |          |          |          |   |          |          |          |
|--------------------------------------------|----------|----------|----------|---|----------|----------|----------|
| C                                          | -6.58480 | -1.85227 | 0.96559  | N | 2.99506  | 0.95140  | 0.87731  |
| H                                          | -6.93105 | -3.27185 | -0.62044 | C | 5.26101  | -1.95020 | -0.18085 |
| H                                          | -5.94056 | -0.39772 | 2.42016  | C | 4.82412  | -3.08679 | -1.11501 |
| H                                          | -7.55926 | -1.99939 | 1.42254  | C | 3.70614  | -3.88061 | -0.42387 |
| C                                          | 5.36925  | 0.44560  | 1.58360  | C | 2.46079  | -2.97906 | -0.33578 |
| H                                          | 5.02945  | 0.09732  | 2.56577  | N | 2.86596  | -1.55632 | -0.57506 |
| H                                          | 6.32283  | -0.03911 | 1.35157  | C | 3.22780  | -1.38563 | -2.01500 |
| H                                          | 5.53961  | 1.52419  | 1.64392  | C | 4.26136  | -2.46363 | -2.40200 |
| H                                          | 5.10778  | -0.84719 | -2.50246 | H | 2.57211  | 0.67635  | 1.79217  |
| C                                          | 0.67153  | 4.41235  | 2.12378  | C | 2.39484  | 1.98862  | 0.27234  |
| H                                          | 0.25391  | 5.41251  | 1.98155  | S | 2.87284  | 2.59895  | -1.26716 |
| H                                          | 0.02386  | 3.85907  | 2.81526  | N | 1.35786  | 2.49784  | 0.96232  |
| H                                          | 1.65559  | 4.51538  | 2.58922  | H | 1.15976  | 2.01948  | 1.86471  |
| C                                          | -1.21696 | 4.80180  | -0.20560 | C | 0.66434  | 3.73236  | 0.66699  |
| H                                          | -1.61351 | 5.28435  | 0.69253  | C | -0.67555 | 3.50293  | -0.06942 |
| H                                          | -0.48151 | 5.47204  | -0.66605 | N | -0.46911 | 2.53340  | -1.15641 |
| H                                          | -2.04010 | 4.67628  | -0.91358 | C | -1.39130 | 1.83428  | -1.75270 |
| H                                          | 2.02815  | -1.12103 | -0.09564 | H | 3.79600  | -3.23955 | -3.02038 |
| O                                          | 1.41504  | 0.43211  | 3.01015  | H | 4.03271  | -4.19471 | 0.57403  |
| C                                          | -5.11593 | 1.33250  | -1.41415 | H | -1.39331 | 3.05246  | 0.62900  |
| H                                          | -5.58010 | 2.09373  | -2.05497 | H | 1.30886  | 4.32400  | 0.00858  |
| H                                          | -5.68802 | 0.40663  | -1.52680 | H | 3.60783  | -0.36867 | -2.13573 |
| H                                          | -5.20866 | 1.67482  | -0.37806 | H | 2.28884  | -1.46499 | -2.56678 |
| C                                          | 0.43083  | -0.41592 | 2.99285  | H | 1.97312  | -3.01383 | 0.64187  |
| C                                          | 0.58145  | -1.74657 | 2.50848  | H | 1.70859  | -3.20572 | -1.09290 |
| C                                          | -0.86772 | -0.07133 | 3.46224  | H | 5.67317  | -3.73665 | -1.34489 |
| C                                          | -0.48096 | -2.64167 | 2.46829  | H | 5.83638  | -2.33593 | 0.66672  |
| H                                          | 1.57087  | -2.04923 | 2.16498  | H | 5.91052  | -1.25356 | -0.72793 |
| C                                          | -1.91882 | -0.98401 | 3.43933  | H | 3.70981  | -1.58983 | 1.31915  |
| H                                          | -1.01123 | 0.93080  | 3.86275  | H | 4.48907  | 0.71670  | -0.52233 |
| C                                          | -1.74861 | -2.27581 | 2.93438  | C | -0.96622 | 0.95525  | -2.89635 |
| H                                          | -0.32123 | -3.64347 | 2.07115  | C | -2.80126 | 1.98165  | -1.44622 |
| H                                          | -2.89345 | -0.68128 | 3.82047  | H | -0.70511 | 1.63366  | -3.71883 |
| H                                          | -2.57970 | -2.97440 | 2.90017  | H | -0.04123 | 0.43385  | -2.62390 |
| <b>3b-<math>\gamma'</math>-addition-3a</b> |          |          |          | C | -3.68154 | 1.01208  | -1.79165 |
| Geometry with 93 atoms:                    |          |          |          | C | -3.16344 | -0.29062 | -2.32363 |
| C                                          | -2.69278 | -1.23467 | -1.13670 | H | 3.46587  | -4.78604 | -0.98969 |
| C                                          | -1.54819 | -0.65975 | -0.37303 | C | -2.05457 | -0.03073 | -3.35800 |
| N                                          | -0.30946 | -0.88856 | -0.74018 | H | -3.98302 | -0.82360 | -2.82130 |
| O                                          | 0.64814  | -0.23643 | -0.15313 | H | -2.54013 | 0.36962  | -4.25473 |
| O                                          | 0.00598  | -1.67230 | -1.70424 | H | -3.14646 | 2.87632  | -0.93748 |
| H                                          | -2.33399 | -2.14142 | -1.63626 | H | -1.58185 | -0.97794 | -3.62963 |
| H                                          | -1.64150 | -0.03498 | 0.50609  | H | 0.51063  | 2.38750  | -1.44685 |
| C                                          | 4.21758  | 0.30470  | 0.45373  | C | -3.87374 | -1.60356 | -0.25800 |
| C                                          | 4.00920  | -1.20853 | 0.33379  | C | -4.64667 | -2.72186 | -0.58734 |
|                                            |          |          |          | C | -4.25948 | -0.83007 | 0.84226  |

|                                            |          |          |          |   |          |          |          |
|--------------------------------------------|----------|----------|----------|---|----------|----------|----------|
| C                                          | -5.77568 | -3.06180 | 0.15703  | H | 1.74446  | -0.38040 | -0.55314 |
| H                                          | -4.35523 | -3.33698 | -1.43683 | H | 1.81760  | -2.59221 | 1.61547  |
| C                                          | -5.38705 | -1.16533 | 1.59019  | C | 3.64704  | -1.42239 | -0.24466 |
| H                                          | -3.67943 | 0.04463  | 1.12525  | C | 4.23109  | -0.80116 | -1.35779 |
| C                                          | -6.15022 | -2.28207 | 1.25054  | C | 4.41484  | -2.32009 | 0.51367  |
| H                                          | -6.35720 | -3.93897 | -0.11327 | C | 5.54962  | -1.07149 | -1.71199 |
| H                                          | -5.66600 | -0.55484 | 2.44514  | H | 3.63895  | -0.10396 | -1.94689 |
| H                                          | -7.02541 | -2.54614 | 1.83743  | C | 5.73211  | -2.58790 | 0.16114  |
| C                                          | 5.33504  | 0.60064  | 1.45701  | H | 3.99014  | -2.79824 | 1.39151  |
| H                                          | 5.06841  | 0.22065  | 2.45051  | C | 6.30248  | -1.96656 | -0.95216 |
| H                                          | 6.28571  | 0.15110  | 1.15343  | H | 5.98916  | -0.58468 | -2.57755 |
| H                                          | 5.47522  | 1.68256  | 1.53290  | H | 6.32033  | -3.27751 | 0.75951  |
| H                                          | 5.06534  | -2.01203 | -2.99183 | H | 7.33319  | -2.17783 | -1.22251 |
| C                                          | 0.43696  | 4.48510  | 1.97666  | C | -4.03359 | 0.98752  | -0.71385 |
| H                                          | -0.02398 | 5.46204  | 1.80956  | C | -4.40813 | -0.37598 | -0.12165 |
| H                                          | -0.20716 | 3.90594  | 2.64875  | N | -2.66789 | 0.95302  | -1.19902 |
| H                                          | 1.39582  | 4.64081  | 2.47844  | C | -5.69866 | -0.34975 | 0.73048  |
| C                                          | -1.20461 | 4.82151  | -0.64044 | C | -5.35518 | -0.64480 | 2.19743  |
| H                                          | -1.50026 | 5.50061  | 0.16328  | C | -4.80695 | -2.07502 | 2.30886  |
| H                                          | -0.42400 | 5.30713  | -1.23677 | C | -3.68753 | -2.26067 | 1.26648  |
| H                                          | -2.07332 | 4.67119  | -1.28635 | N | -3.29428 | -0.90986 | 0.74455  |
| H                                          | 1.98563  | -0.94527 | -0.37584 | C | -2.96664 | 0.01343  | 1.88571  |
| O                                          | 1.43269  | 0.79663  | 3.11218  | C | -4.26330 | 0.33668  | 2.64642  |
| C                                          | -5.15808 | 1.19021  | -1.62594 | H | -2.43905 | 0.29864  | -1.98607 |
| H                                          | -5.60819 | 1.31968  | -2.61997 | C | -1.77612 | 1.96070  | -1.03864 |
| H                                          | -5.62106 | 0.30363  | -1.18200 | S | -2.05584 | 3.28706  | 0.01228  |
| H                                          | -5.40332 | 2.06761  | -1.02084 | N | -0.64341 | 1.81109  | -1.74865 |
| C                                          | 0.40829  | -0.00629 | 3.13707  | H | -0.63233 | 0.99101  | -2.37611 |
| C                                          | 0.52469  | -1.39153 | 2.83672  | C | 0.35629  | 2.84824  | -1.97500 |
| C                                          | -0.89854 | 0.45048  | 3.46399  | C | 1.61270  | 2.68242  | -1.09449 |
| C                                          | -0.57622 | -2.23833 | 2.83179  | N | 1.21331  | 2.47891  | 0.28203  |
| H                                          | 1.51753  | -1.76985 | 2.59589  | C | 2.02073  | 1.97720  | 1.25355  |
| C                                          | -1.99308 | -0.41160 | 3.47340  | H | -4.08755 | 0.25085  | 3.72288  |
| H                                          | -1.01833 | 1.49898  | 3.73250  | H | -5.59903 | -2.80857 | 2.13183  |
| C                                          | -1.85357 | -1.76252 | 3.14956  | H | 2.15430  | 1.77799  | -1.42475 |
| H                                          | -0.44195 | -3.28845 | 2.57580  | H | -0.10874 | 3.80286  | -1.70607 |
| H                                          | -2.97491 | -0.02061 | 3.73909  | H | -2.48121 | 0.89677  | 1.46377  |
| H                                          | -2.71476 | -2.42448 | 3.13643  | H | -2.23683 | -0.52396 | 2.49486  |
|                                            |          |          |          | H | -4.01371 | -2.84238 | 0.40072  |
|                                            |          |          |          | H | -2.78511 | -2.71559 | 1.67536  |
|                                            |          |          |          | H | -6.24807 | -0.53080 | 2.81801  |
|                                            |          |          |          | H | -6.42149 | -1.08010 | 0.35225  |
|                                            |          |          |          | H | -6.16423 | 0.63862  | 0.65500  |
|                                            |          |          |          | H | -4.49231 | -1.10133 | -0.93813 |
|                                            |          |          |          | H | -4.08781 | 1.74941  | 0.06943  |
|                                            |          |          |          | C | 1.31342  | 1.58734  | 2.53195  |
| <b>3b-<math>\gamma'</math>-addition-2b</b> |          |          |          |   |          |          |          |
| Geometry with 93 atoms:                    |          |          |          |   |          |          |          |
| C                                          | 2.24447  | -1.13529 | 0.05212  |   |          |          |          |
| C                                          | 1.50765  | -1.79532 | 0.95505  |   |          |          |          |
| N                                          | 0.10391  | -1.52698 | 1.06014  |   |          |          |          |
| O                                          | -0.52781 | -2.18965 | 1.88386  |   |          |          |          |
| O                                          | -0.41500 | -0.66777 | 0.35544  |   |          |          |          |

|                                                 |          |          |          |   |          |          |          |
|-------------------------------------------------|----------|----------|----------|---|----------|----------|----------|
| C                                               | 3.35258  | 1.70811  | 1.12257  | C | -2.12672 | -2.28569 | -0.87911 |
| H                                               | 0.43505  | 2.22579  | 2.68594  | N | -0.74964 | -2.31865 | -0.90117 |
| H                                               | 0.93826  | 0.56150  | 2.38891  | O | -0.18390 | -3.32912 | -1.37974 |
| C                                               | 4.10739  | 1.09992  | 2.21856  | O | -0.07929 | -1.37268 | -0.42931 |
| C                                               | 3.57382  | 0.99954  | 3.45300  | H | -2.20043 | -0.40070 | 0.05298  |
| H                                               | -4.41894 | -2.24762 | 3.31828  | H | -2.58081 | -3.19595 | -1.24341 |
| C                                               | 2.23623  | 1.62912  | 3.74828  | C | -4.19259 | -1.29844 | 0.09544  |
| H                                               | 4.15428  | 0.58009  | 4.27258  | C | -4.59325 | -0.48456 | 1.16244  |
| H                                               | 2.39486  | 2.68125  | 4.03860  | C | -5.11445 | -2.20887 | -0.44018 |
| H                                               | 3.87688  | 1.90007  | 0.18993  | C | -5.87789 | -0.58441 | 1.69221  |
| H                                               | 1.74443  | 1.14319  | 4.59770  | H | -3.88738 | 0.23409  | 1.57494  |
| H                                               | 0.24048  | 2.65967  | 0.51461  | C | -6.40129 | -2.30125 | 0.08131  |
| C                                               | -4.99955 | 1.34826  | -1.84294 | H | -4.83083 | -2.83909 | -1.27981 |
| H                                               | -4.89220 | 0.64176  | -2.67417 | C | -6.78737 | -1.49185 | 1.15182  |
| H                                               | -6.04247 | 1.33739  | -1.50924 | H | -6.16757 | 0.04848  | 2.52641  |
| H                                               | -4.76896 | 2.35131  | -2.21273 | H | -7.10600 | -3.00862 | -0.34691 |
| H                                               | -4.57538 | 1.36775  | 2.44531  | H | -7.79026 | -1.57122 | 1.56139  |
| C                                               | 0.71118  | 2.85222  | -3.46009 | C | 4.14954  | 0.39268  | 0.26075  |
| H                                               | 1.37502  | 3.68448  | -3.70729 | C | 4.05882  | -1.13233 | 0.36258  |
| H                                               | 1.20797  | 1.91632  | -3.74605 | N | 2.89797  | 0.98262  | 0.70015  |
| H                                               | -0.19730 | 2.95009  | -4.06158 | C | 5.22573  | -1.86970 | -0.33872 |
| C                                               | 2.52927  | 3.90344  | -1.24887 | C | 4.69658  | -2.64273 | -1.55559 |
| H                                               | 3.06647  | 3.88839  | -2.20241 | C | 3.74839  | -3.75133 | -1.07725 |
| H                                               | 1.93767  | 4.82526  | -1.19466 | C | 2.74013  | -3.14381 | -0.08711 |
| H                                               | 3.26838  | 3.93592  | -0.44464 | N | 2.77307  | -1.64843 | -0.23181 |
| H                                               | -2.43396 | -0.99796 | 0.17440  | C | 2.62135  | -1.26730 | -1.68001 |
| C                                               | 5.52696  | 0.69443  | 1.91964  | C | 3.90115  | -1.66707 | -2.43291 |
| H                                               | 6.14904  | 1.59034  | 1.78861  | H | 2.57544  | 0.77744  | 1.67616  |
| H                                               | 5.95697  | 0.10056  | 2.73254  | C | 2.39884  | 2.13936  | 0.19945  |
| H                                               | 5.59926  | 0.11883  | 0.99062  | S | 2.92458  | 2.79912  | -1.29533 |
| O                                               | -1.48256 | -0.50404 | -3.14124 | N | 1.43429  | 2.69420  | 0.95336  |
| C                                               | -1.03382 | -1.59326 | -2.59913 | H | 1.20942  | 2.18097  | 1.82730  |
| C                                               | -1.88218 | -2.48838 | -1.88185 | C | 0.82510  | 3.99995  | 0.74073  |
| C                                               | 0.34052  | -1.96523 | -2.67484 | C | -0.55088 | 3.88952  | 0.04573  |
| C                                               | -1.38197 | -3.62055 | -1.24477 | N | -0.41663 | 2.98879  | -1.09273 |
| H                                               | -2.95189 | -2.28125 | -1.88377 | C | -1.35753 | 2.14085  | -1.51788 |
| C                                               | 0.82002  | -3.10990 | -2.05404 | H | 3.62953  | -2.13671 | -3.38315 |
| H                                               | 1.00623  | -1.32300 | -3.24987 | H | 4.30493  | -4.55503 | -0.58591 |
| C                                               | -0.02421 | -3.94251 | -1.31051 | H | -1.25304 | 3.41693  | 0.74818  |
| H                                               | -2.06239 | -4.27517 | -0.70089 | H | 1.49284  | 4.56557  | 0.08207  |
| H                                               | 1.87900  | -3.35290 | -2.13346 | H | 2.41497  | -0.19423 | -1.71667 |
| H                                               | 0.36225  | -4.82930 | -0.81668 | H | 1.73915  | -1.80715 | -2.02751 |
|                                                 |          |          |          | H | 2.99753  | -3.35379 | 0.95381  |
|                                                 |          |          |          | H | 1.71077  | -3.45287 | -0.27480 |
|                                                 |          |          |          | H | 5.53279  | -3.06771 | -2.11748 |
|                                                 |          |          |          | H | 5.72194  | -2.55009 | 0.36140  |
| <b>3b-<math>\gamma'</math>-addition-TS2b-3b</b> |          |          |          |   |          |          |          |
| Geometry with 93 atoms:                         |          |          |          |   |          |          |          |
| C                                               | -2.81210 | -1.16840 | -0.41924 |   |          |          |          |



|   |          |          |          |
|---|----------|----------|----------|
| H | 5.97203  | -1.14018 | -0.66918 |
| H | 4.00229  | -1.40692 | 1.42068  |
| H | 4.30619  | 0.68176  | -0.78286 |
| C | -0.84024 | 0.96685  | -2.30490 |
| C | -2.70093 | 2.24733  | -1.18335 |
| H | -0.11197 | 1.31610  | -3.04674 |
| H | -0.27882 | 0.36127  | -1.57717 |
| C | -3.63061 | 1.24950  | -1.56598 |
| C | -3.21939 | 0.08537  | -2.20616 |
| H | 3.22291  | -4.18971 | -1.93265 |
| C | -1.91844 | 0.10155  | -2.96280 |
| H | -3.99403 | -0.57579 | -2.59164 |
| H | -2.12843 | 0.48023  | -3.97405 |
| H | -3.05624 | 3.10433  | -0.61850 |
| H | -1.53755 | -0.92029 | -3.09194 |
| H | 0.53530  | 2.83922  | -1.43307 |
| C | 5.31080  | 0.90853  | 1.11337  |
| H | 5.12714  | 0.69117  | 2.17203  |
| H | 6.26679  | 0.45950  | 0.82574  |
| H | 5.39462  | 1.99263  | 0.99431  |
| H | 4.50672  | -0.78326 | -2.66343 |
| C | 0.71343  | 4.70384  | 2.09020  |
| H | 0.32339  | 5.71875  | 1.97847  |
| H | 0.05020  | 4.14853  | 2.76454  |
| H | 1.69923  | 4.76732  | 2.55946  |
| C | -1.08252 | 5.25770  | -0.38205 |
| H | -1.34689 | 5.87307  | 0.48281  |
| H | -0.32813 | 5.78849  | -0.97439 |
| H | -1.97689 | 5.14325  | -1.00172 |
| H | 1.95877  | -1.26608 | 0.27912  |
| C | -5.08160 | 1.48217  | -1.25164 |
| H | -5.48420 | 2.20694  | -1.97209 |
| H | -5.67237 | 0.56573  | -1.33070 |
| H | -5.21990 | 1.90681  | -0.25175 |
| O | 1.49102  | 0.81691  | 2.99846  |
| C | 0.78845  | -0.27293 | 2.87089  |
| C | 1.40118  | -1.55725 | 2.81616  |
| C | -0.63182 | -0.25828 | 2.77511  |
| C | 0.65536  | -2.72322 | 2.64760  |
| H | 2.47895  | -1.60885 | 2.96839  |
| C | -1.36185 | -1.42915 | 2.61984  |
| H | -1.13377 | 0.70655  | 2.84109  |
| C | -0.73337 | -2.67613 | 2.53685  |
| H | 1.16461  | -3.68583 | 2.62065  |
| H | -2.44733 | -1.38079 | 2.56240  |
| H | -1.31501 | -3.58371 | 2.40306  |

### 3b- $\gamma'$ -addition-3b

Geometry with 93 atoms:

|   |          |          |          |
|---|----------|----------|----------|
| C | -2.73691 | -0.95584 | -0.94884 |
| C | -2.00138 | -1.99736 | -1.72716 |
| N | -0.69120 | -1.95995 | -1.85196 |
| O | -0.05332 | -2.86598 | -2.49658 |
| O | -0.00317 | -1.00136 | -1.30866 |
| H | -1.98533 | -0.41200 | -0.36609 |
| H | -2.48653 | -2.83947 | -2.20288 |
| C | -3.72011 | -1.58123 | 0.02453  |
| C | -3.62861 | -1.30903 | 1.39212  |
| C | -4.74984 | -2.41550 | -0.42644 |
| C | -4.54814 | -1.85197 | 2.29079  |
| H | -2.82476 | -0.67331 | 1.75796  |
| C | -5.67039 | -2.95877 | 0.46708  |
| H | -4.83592 | -2.64363 | -1.48764 |
| C | -5.57391 | -2.67507 | 1.83059  |
| H | -4.45437 | -1.63460 | 3.35131  |
| H | -6.46193 | -3.60671 | 0.10008  |
| H | -6.28962 | -3.09958 | 2.52904  |
| C | 3.89357  | 0.54449  | 0.14292  |
| C | 3.74690  | -0.98001 | 0.23350  |
| N | 2.65111  | 1.13677  | 0.60975  |
| C | 5.00676  | -1.78205 | -0.17678 |
| C | 4.70303  | -2.64462 | -1.40880 |
| C | 3.61930  | -3.67443 | -1.05946 |
| C | 2.42666  | -2.94567 | -0.41171 |
| N | 2.60442  | -1.46758 | -0.61580 |
| C | 2.79357  | -1.19191 | -2.08348 |
| C | 4.17388  | -1.71589 | -2.50980 |
| H | 2.39127  | 0.92395  | 1.59713  |
| C | 2.07876  | 2.26638  | 0.15048  |
| S | 2.44904  | 2.96044  | -1.37292 |
| N | 1.14975  | 2.77056  | 0.99176  |
| H | 1.03381  | 2.23534  | 1.87683  |
| C | 0.52412  | 4.07747  | 0.88674  |
| C | -0.91336 | 3.96292  | 0.34043  |
| N | -0.85502 | 3.14037  | -0.87612 |
| C | -1.77385 | 2.32791  | -1.31609 |
| H | 4.08009  | -2.25227 | -3.45911 |
| H | 4.01311  | -4.42586 | -0.36826 |
| H | -1.51669 | 3.41253  | 1.07206  |
| H | 1.11211  | 4.67004  | 0.17694  |
| H | 2.66180  | -0.11856 | -2.23847 |
| H | 1.96451  | -1.70869 | -2.57044 |

|   |          |          |          |   |          |          |          |
|---|----------|----------|----------|---|----------|----------|----------|
| H | 2.36413  | -3.10383 | 0.66802  | H | 0.15737  | 5.77068  | 2.20470  |
| H | 1.47025  | -3.19919 | -0.87531 | H | -0.05921 | 4.18301  | 2.97785  |
| H | 5.61591  | -3.14821 | -1.73971 | H | 1.56930  | 4.78985  | 2.63044  |
| H | 5.34190  | -2.40486 | 0.65917  | C | -1.53686 | 5.32203  | 0.03362  |
| H | 5.82464  | -1.09743 | -0.41913 | H | -1.71531 | 5.88169  | 0.95529  |
| H | 3.44964  | -1.22358 | 1.26165  | H | -0.87442 | 5.90991  | -0.61159 |
| H | 4.05899  | 0.85509  | -0.89325 | H | -2.49610 | 5.20564  | -0.47988 |
| C | -1.40508 | 1.42938  | -2.45603 | H | 1.70798  | -1.02498 | -0.34615 |
| C | -3.08904 | 2.27068  | -0.72704 | C | -5.33628 | 1.24059  | -0.48662 |
| H | -0.92026 | 2.02501  | -3.23808 | H | -6.03906 | 1.26330  | -1.33011 |
| H | -0.64720 | 0.72846  | -2.06579 | H | -5.53848 | 0.31471  | 0.06317  |
| C | -3.94007 | 1.25242  | -1.01923 | H | -5.53725 | 2.09574  | 0.16376  |
| C | -3.47468 | 0.10049  | -1.86991 | O | 1.44158  | 0.93232  | 3.05685  |
| H | 3.29483  | -4.19727 | -1.96577 | C | 0.97581  | -0.28372 | 2.96140  |
| C | -2.59214 | 0.63984  | -2.99989 | C | 1.19291  | -1.25567 | 3.97743  |
| H | -4.35008 | -0.39660 | -2.30615 | C | 0.25806  | -0.72615 | 1.81332  |
| H | -3.20839 | 1.27806  | -3.64519 | C | 0.71991  | -2.55749 | 3.85077  |
| H | -3.40269 | 3.06162  | -0.05252 | H | 1.74062  | -0.94650 | 4.86507  |
| H | -2.22253 | -0.18963 | -3.60961 | C | -0.20250 | -2.03608 | 1.69484  |
| H | 0.05850  | 3.12875  | -1.35721 | H | 0.06460  | -0.01206 | 1.01217  |
| C | 5.04515  | 1.04323  | 1.02108  | C | 0.01652  | -2.96790 | 2.71177  |
| H | 4.89097  | 0.73603  | 2.06234  | H | 0.90137  | -3.26856 | 4.65510  |
| H | 6.01829  | 0.67369  | 0.68736  | H | -0.74015 | -2.32804 | 0.79306  |
| H | 5.07114  | 2.13632  | 0.98755  | H | -0.35263 | -3.98527 | 2.61958  |
| H | 4.87695  | -0.88941 | -2.66672 |   |          |          |          |
| C | 0.54260  | 4.74899  | 2.25689  |   |          |          |          |
